# Supplementary material for: Mechano-synthesis of a AgSrFeO3 catalyst for epoxidation of ethylene in a chemical looping set-up
Source: Royal Society of Chemistry journal article supplement (doi:10.1039/d4ma00485j), 2024-01-01
Supplement: d4ma00485j1.xlsx [file d4ma00485j1.xlsx]

## Sheet: Data proc with Conc vector
Index	Time	ms	Ethylene mbar	Carbon monoxide mbar	Argon mbar	Ethylene oxide mbar	Carbon dioxide mbar	Corrected Ethylene mbar	Corrected CO mbar	Corrected Ar mbar	Corrected CO2 mbar	Ethylene (ć )	CO (ć )	ETO (ć )	CO2 (ć )		Conv	Select	Yield
1	2022-03-07 10:10:30	4656	2.37628e-08	1.17731e-09	5.72973e-07	4.45581e-10	8.11529e-10	1.53983e-08	2.35462e-12	5.70108e-07	2.81601e-10	0.0268744	4.10948e-06	0.000777665	0.000491473		3.67549	75.836	2.78735
2	2022-03-07 10:11:01	35607	2.18104e-09	4.02212e-10	6.46432e-07	6.20318e-11	2.54401e-10	1.41331e-09	8.04424e-13	6.432e-07	8.82771e-11	0.00218633	1.24441e-06	9.59603e-05	0.000136561		7.01188	58.2062	4.08134
3	2022-03-07 10:11:45	79265	7.46543e-10	2.83881e-10	6.51538e-07	4.07134e-11	2.01539e-10	4.8376e-10	5.67762e-13	6.4828e-07	6.9934e-11	0.000742489	8.71418e-07	6.24881e-05	0.000107337		13.5717	53.5954	7.27383
4	2022-03-07 10:12:20	114911	5.33027e-10	2.41844e-10	6.49747e-07	3.34432e-11	1.80183e-10	3.45401e-10	4.83688e-13	6.46498e-07	6.25235e-11	0.000531594	7.44425e-07	5.14711e-05	9.62275e-05		15.8272	51.4932	8.14995
5	2022-03-07 10:12:56	150556	5.85992e-10	3.6681e-10	1.73847e-08	4.89168e-11	2.92169e-10	3.79723e-10	7.3362e-13	1.72978e-08	1.01383e-10	0.0218424	4.21992e-05	0.00281378	0.00583172		20.8412	48.9291	10.1974
6	2022-03-07 10:13:33	187221	4.92112e-10	3.74724e-10	6.86519e-09	4.04382e-11	2.64153e-10	3.18889e-10	7.49448e-13	6.83086e-09	9.16611e-11	0.0464501	0.000109166	0.00589032	0.0133516		21.3654	46.672	9.97164
7	2022-03-07 10:14:12	226486	3.88579e-10	3.58138e-10	4.26346e-09	3.52213e-11	2.42139e-10	2.51799e-10	7.16276e-13	4.24214e-09	8.40222e-11	0.0590598	0.000168003	0.0082612	0.0197075		23.5558	45.3938	10.6929
8	2022-03-07 10:14:50	264731	3.16167e-10	3.55169e-10	3.16398e-09	3.21414e-11	2.30606e-10	2.04876e-10	7.10338e-13	3.14816e-09	8.00203e-11	0.0647527	0.000224508	0.0101585	0.025291		26.1396	44.3289	11.5874
9	2022-03-07 10:15:28	302976	2.73694e-10	3.4447e-10	2.67782e-09	2.86046e-11	2.13604e-10	1.77354e-10	6.8894e-13	2.66443e-09	7.41206e-11	0.0662306	0.000257276	0.010682	0.0276795		27.1238	43.3342	11.7539
10	2022-03-07 10:16:07	341221	2.33102e-10	3.44808e-10	2.36393e-09	2.69276e-11	2.05363e-10	1.5105e-10	6.89616e-13	2.35211e-09	7.1261e-11	0.0638979	0.000291724	0.011391	0.0301451		29.4003	42.8082	12.5858
11	2022-03-07 10:16:45	379466	1.95026e-10	3.26021e-10	2.21725e-09	2.4897e-11	1.96821e-10	1.26377e-10	6.52042e-13	2.20616e-09	6.82969e-11	0.0569971	0.000294077	0.0112288	0.0308025		31.9634	41.9343	13.4036
12	2022-03-07 10:17:23	417711	1.83899e-10	3.24189e-10	2.10701e-09	2.37843e-11	1.82879e-10	1.19167e-10	6.48378e-13	2.09647e-09	6.3459e-11	0.0565572	0.000307724	0.0112882	0.030118		31.9066	42.5952	13.5907
13	2022-03-07 10:18:01	455956	1.7488e-10	3.20288e-10	2.04811e-09	2.26416e-11	1.76444e-10	1.13322e-10	6.40576e-13	2.03787e-09	6.12261e-11	0.0553302	0.000312764	0.0110549	0.0298939		32.1006	42.2616	13.5662
14	2022-03-07 10:18:40	494201	1.4492e-10	3.0017e-10	1.94334e-09	2.12151e-11	1.69375e-10	9.39082e-11	6.0034e-13	1.93362e-09	5.87731e-11	0.0483231	0.000308922	0.0109168	0.0302434		35.1508	41.6785	14.6503
15	2022-03-07 10:19:18	532446	1.57487e-10	3.20676e-10	1.91275e-09	2.07217e-11	1.64278e-10	1.02052e-10	6.41352e-13	1.90319e-09	5.70045e-11	0.0533533	0.000335304	0.0108335	0.0298024		32.682	41.8243	13.669
16	2022-03-07 10:19:56	570691	1.35697e-10	3.18066e-10	1.83142e-09	2.0053e-11	1.60971e-10	8.79317e-11	6.36132e-13	1.82226e-09	5.58569e-11	0.0480128	0.000347344	0.0109494	0.0304993		35.4541	41.518	14.7198
17	2022-03-07 10:20:34	608936	1.39943e-10	2.97037e-10	1.81353e-09	1.9451e-11	1.5539e-10	9.06831e-11	5.94074e-13	1.80446e-09	5.39203e-11	0.0500036	0.000327579	0.0107255	0.0297323		33.9965	41.6436	14.1574
18	2022-03-07 10:21:13	647181	1.31149e-10	3.06385e-10	1.76343e-09	1.85749e-11	1.5468e-10	8.49846e-11	6.1277e-13	1.75461e-09	5.3674e-11	0.0481928	0.000347488	0.0105334	0.0304373		34.9788	40.6291	14.2116
19	2022-03-07 10:21:51	685426	1.26e-10	2.99187e-10	1.78446e-09	1.83696e-11	1.48931e-10	8.1648e-11	5.98374e-13	1.77554e-09	5.16791e-11	0.045755	0.000335325	0.0102942	0.0289606		35.2803	41.2723	14.561
20	2022-03-07 10:22:29	723671	1.34987e-10	3.03937e-10	1.76207e-09	1.80245e-11	1.45773e-10	8.74716e-11	6.07874e-13	1.75326e-09	5.05832e-11	0.0496414	0.000344977	0.0102292	0.0287067		33.2745	41.3216	13.7495
21	2022-03-07 10:23:07	761916	1.04618e-10	2.8944e-10	1.70082e-09	1.71129e-11	1.46061e-10	6.77925e-11	5.7888e-13	1.69232e-09	5.06832e-11	0.0398587	0.000340353	0.0100616	0.0297993		38.6695	40.0359	15.4817
22	2022-03-07 10:23:46	800161	1.16916e-10	2.74892e-10	1.7241e-09	1.73042e-11	1.44165e-10	7.57616e-11	5.49784e-13	1.71548e-09	5.00253e-11	0.0439427	0.000318882	0.0100367	0.0290153		35.9869	40.6281	14.6208
23	2022-03-07 10:24:24	838406	9.73411e-11	2.83226e-10	1.66377e-09	1.67463e-11	1.42082e-10	6.3077e-11	5.66452e-13	1.65545e-09	4.93025e-11	0.0379121	0.000340463	0.0100653	0.029633		39.7877	40.1775	15.9857
24	2022-03-07 10:25:02	876651	1.05887e-10	2.67735e-10	1.64832e-09	1.66001e-11	1.39736e-10	6.86148e-11	5.3547e-13	1.64008e-09	4.84884e-11	0.0416271	0.000324858	0.0100709	0.0294169		37.4676	40.3777	15.1286
25	2022-03-07 10:25:40	914896	1.11574e-10	2.7913e-10	1.63144e-09	1.58917e-11	1.40844e-10	7.23e-11	5.5826e-13	1.62328e-09	4.88729e-11	0.0443166	0.000342188	0.0097409	0.0299569		35.9652	39.1351	14.075
26	2022-03-07 10:26:19	953141	1.02576e-10	2.56587e-10	1.65223e-09	1.54413e-11	1.36246e-10	6.64692e-11	5.13174e-13	1.64397e-09	4.72774e-11	0.04023	0.000310595	0.00934573	0.0286143		37.1781	39.2543	14.594
27	2022-03-07 10:26:57	991386	9.6954e-11	2.74298e-10	1.62942e-09	1.46253e-11	1.35834e-10	6.28262e-11	5.48596e-13	1.62127e-09	4.71344e-11	0.0385574	0.000336682	0.00897577	0.0289271		37.9758	38.0206	14.4386
28	2022-03-07 10:27:35	1029631	1.01899e-10	2.70889e-10	6.3457e-09	1.40373e-11	1.44338e-10	6.60306e-11	5.41778e-13	6.31397e-09	5.00853e-11	0.0104056	8.53772e-05	0.0022121	0.00789279		37.3414	35.6722	13.3205
29	2022-03-07 10:28:13	1067876	7.51316e-11	1.22089e-10	7.02422e-07	1.1897e-11	1.12136e-10	4.86853e-11	2.44178e-13	6.9891e-07	3.89112e-11	6.93106e-05	3.47623e-07	1.69371e-05	5.53957e-05		39.2648	37.7986	14.8416
30	2022-03-07 10:28:53	1107665	8.34951e-11	1.21505e-10	7.10036e-07	1.0937e-11	1.05221e-10	5.41048e-11	2.4301e-13	7.06486e-07	3.65117e-11	7.62001e-05	3.4225e-07	1.54034e-05	5.14223e-05		35.141	37.3094	13.1109
31	2022-03-07 10:29:29	1143311	4.10111e-11	1.03589e-10	7.10843e-07	4.60584e-11	1.91724e-09	2.65752e-11	2.07178e-13	7.07289e-07	6.65282e-10	3.73855e-05	2.91454e-07	6.47941e-05	0.000935906		93.4443	12.1589	11.3618
32	2022-03-07 10:30:15	1189407	2.74111e-08	4.75108e-10	6.85222e-07	4.18489e-10	6.81358e-10	1.77624e-08	9.50216e-13	6.81796e-07	2.36431e-10	0.0259221	1.38673e-06	0.000610735	0.000345043		2.93548	77.9048	2.28688
33	2022-03-07 10:30:45	1219480	2.85285e-08	4.49574e-10	6.8558e-07	4.65674e-10	8.64921e-10	1.84865e-08	8.99148e-13	6.82152e-07	3.00128e-10	0.0269647	1.31151e-06	0.000679241	0.000437772		3.22566	75.5734	2.43774
34	2022-03-07 10:31:15	1249555	1.65408e-08	3.93664e-10	6.86834e-07	4.87487e-10	8.07093e-10	1.07184e-08	7.87328e-13	6.834e-07	2.80061e-10	0.0156056	1.14631e-06	0.00070976	0.000407757		5.53404	77.6363	4.29642
35	2022-03-07 10:31:42	1276380	1.90026e-08	3.60093e-10	6.92657e-07	7.54585e-11	3.09711e-10	1.23137e-08	7.20186e-13	6.89194e-07	1.0747e-10	0.0177775	1.03974e-06	0.000108941	0.000155156		1.04116	58.2451	0.606422
36	2022-03-07 10:32:15	1309456	1.40332e-09	1.44254e-10	7.37628e-07	3.47601e-11	2.28097e-10	9.09351e-10	2.88508e-13	7.3394e-07	7.91497e-11	0.0012328	3.91129e-07	4.71242e-05	0.000107303		7.57033	46.6709	3.53314
37	2022-03-07 10:32:52	1346012	7.66269e-10	1.3248e-10	7.38882e-07	2.68072e-11	1.93284e-10	4.96542e-10	2.6496e-13	7.35188e-07	6.70695e-11	0.000672018	3.58596e-07	3.62808e-05	9.07717e-05		10.8568	44.3281	4.81264
38	2022-03-07 10:33:27	1381660	5.53774e-10	1.34006e-10	7.38882e-07	2.30082e-11	1.74649e-10	3.58846e-10	2.68012e-13	7.35188e-07	6.06032e-11	0.00048566	3.62726e-07	3.11392e-05	8.20201e-05		12.9627	43.0512	5.5806
39	2022-03-07 10:34:03	1417306	6.45418e-10	2.65842e-10	1.29475e-08	3.4444e-11	2.90605e-10	4.18231e-10	5.31684e-13	1.28828e-08	1.0084e-10	0.0323021	4.10646e-05	0.00266028	0.00778837		16.9123	40.4606	6.84281
40	2022-03-07 10:34:39	1453971	4.26634e-10	2.43021e-10	5.93505e-09	2.86315e-11	2.59727e-10	2.76459e-10	4.86042e-13	5.90537e-09	9.01253e-11	0.0465807	8.18935e-05	0.00482414	0.0151853		21.101	38.7241	8.17118
41	2022-03-07 10:35:19	1493236	3.3513e-10	2.62668e-10	3.84209e-09	2.52582e-11	2.42408e-10	2.17164e-10	5.25336e-13	3.82288e-09	8.41156e-11	0.0565224	0.000136732	0.00657408	0.0218932		23.7332	37.376	8.87053
42	2022-03-07 10:35:57	1531481	2.83498e-10	2.63549e-10	3.00673e-09	2.1959e-11	2.2146e-10	1.83707e-10	5.27098e-13	2.9917e-09	7.68466e-11	0.0610985	0.000175306	0.00730328	0.0255582		24.819	36.2086	8.98661
43	2022-03-07 10:36:35	1569726	2.46851e-10	2.4987e-10	2.57088e-09	2.03271e-11	2.08137e-10	1.59959e-10	4.9974e-13	2.55803e-09	7.22235e-11	0.0622197	0.000194385	0.00790667	0.0280929		26.1663	35.8574	9.38254
44	2022-03-07 10:37:13	1607971	2.00788e-10	2.43e-10	2.3223e-09	1.84018e-11	1.98366e-10	1.30111e-10	4.86e-13	2.31069e-09	6.8833e-11	0.0560266	0.000209275	0.00792395	0.02964		28.968	34.6803	10.0462
45	2022-03-07 10:37:52	1646216	1.95853e-10	2.54078e-10	2.17222e-09	1.72311e-11	1.89756e-10	1.26913e-10	5.08156e-13	2.16136e-09	6.58453e-11	0.0584254	0.000233934	0.00793248	0.0303125		28.4275	34.1834	9.71748
46	2022-03-07 10:38:30	1684461	1.73601e-10	2.47843e-10	2.06391e-09	1.59143e-11	1.75902e-10	1.12493e-10	4.95686e-13	2.05359e-09	6.1038e-11	0.054505	0.000240168	0.00771075	0.029574		29.327	34.0915	9.99802
47	2022-03-07 10:39:08	1722706	1.59594e-10	2.45683e-10	1.99349e-09	1.50059e-11	1.73031e-10	1.03417e-10	4.91366e-13	1.98352e-09	6.00418e-11	0.0518773	0.000246485	0.00752745	0.0301189		30.4477	33.1458	10.0921
48	2022-03-07 10:39:46	1760951	1.59357e-10	2.48242e-10	1.92818e-09	1.40212e-11	1.64e-10	1.03263e-10	4.96484e-13	1.91854e-09	5.6908e-11	0.0535548	0.000257488	0.00727173	0.0295138		29.2653	32.8185	9.60443
49	2022-03-07 10:40:25	1799196	1.356e-10	2.39212e-10	1.88642e-09	1.38621e-11	1.62349e-10	8.78688e-11	4.78424e-13	1.87699e-09	5.63351e-11	0.0465797	0.000253615	0.00734836	0.0298635		32.4801	32.7951	10.6519
50	2022-03-07 10:41:03	1837441	1.26774e-10	2.55706e-10	1.85171e-09	1.32364e-11	1.61072e-10	8.21496e-11	5.11412e-13	1.84245e-09	5.5892e-11	0.0443642	0.000276184	0.0071482	0.030184		33.5293	31.9426	10.7101
51	2022-03-07 10:41:41	1875686	1.49575e-10	2.61091e-10	1.80356e-09	1.26441e-11	1.52933e-10	9.69246e-11	5.22182e-13	1.79454e-09	5.30678e-11	0.0537407	0.000289528	0.00701063	0.0294239		28.922	32.0598	9.27234
52	2022-03-07 10:42:19	1913931	1.31633e-10	2.47095e-10	1.78158e-09	1.22378e-11	1.50629e-10	8.52982e-11	4.9419e-13	1.77267e-09	5.22683e-11	0.0478778	0.000277389	0.00686907	0.0293382		31.1652	31.6885	9.87579
53	2022-03-07 10:42:58	1952176	1.18206e-10	2.37175e-10	1.76746e-09	1.20045e-11	1.46929e-10	7.65975e-11	4.7435e-13	1.75862e-09	5.09844e-11	0.0433376	0.000268379	0.00679195	0.0288461		33.0039	31.8136	10.4997
54	2022-03-07 10:43:36	1990421	1.25925e-10	2.3097e-10	1.75167e-09	1.15422e-11	1.44813e-10	8.15994e-11	4.6194e-13	1.74291e-09	5.02501e-11	0.0465838	0.000263714	0.00658925	0.028687		31.1384	31.2812	9.74045
55	2022-03-07 10:44:14	2028666	1.11531e-10	2.46512e-10	1.69998e-09	1.11122e-11	1.39304e-10	7.22721e-11	4.93024e-13	1.69148e-09	4.83385e-11	0.0425135	0.000290018	0.00653667	0.0284347		32.9573	31.2773	10.3082
56	2022-03-07 10:44:52	2066911	1.0751e-10	2.50065e-10	1.68082e-09	1.11552e-11	1.38719e-10	6.96665e-11	5.0013e-13	1.67242e-09	4.81355e-11	0.0414479	0.000297551	0.00663676	0.0286381		33.739	31.447	10.6099
57	2022-03-07 10:45:31	2105156	9.63951e-11	2.54016e-10	1.68105e-09	1.05264e-11	1.36083e-10	6.2464e-11	5.08032e-13	1.67264e-09	4.72208e-11	0.0371577	0.000302211	0.0062618	0.0280901		35.5076	30.6082	10.8682
58	2022-03-07 10:46:09	2143401	1.05446e-10	2.42468e-10	1.65549e-09	1.04113e-11	1.36635e-10	6.8329e-11	4.84936e-13	1.64721e-09	4.74123e-11	0.0412742	0.000292926	0.00628895	0.0286395		33.4602	30.3007	10.1387
59	2022-03-07 10:46:47	2181646	1.10606e-10	2.37676e-10	1.63598e-09	1.04382e-11	1.3223e-10	7.16727e-11	4.75352e-13	1.6278e-09	4.58838e-11	0.0438102	0.000290561	0.0063804	0.0280467		31.9286	31.0496	9.91372
60	2022-03-07 10:47:25	2219891	8.98268e-11	2.43963e-10	1.63599e-09	9.84485e-12	1.33526e-10	5.82078e-11	4.87926e-13	1.62781e-09	4.63335e-11	0.0355795	0.000298245	0.00601767	0.0283214		36.3595	29.6036	10.7637
61	2022-03-07 10:48:04	2258136	8.62471e-11	2.42386e-10	1.61688e-09	9.7395e-12	1.32359e-10	5.58881e-11	4.84772e-13	1.6088e-09	4.59286e-11	0.0345654	0.000299819	0.00602364	0.0284057		37.0872	29.5619	10.9637
62	2022-03-07 10:48:42	2296381	1.02909e-10	2.13402e-10	6.80743e-07	7.48092e-12	1.13796e-10	6.6685e-11	4.26804e-13	6.77339e-07	3.94872e-11	9.79592e-05	6.26968e-07	1.09893e-05	5.8006e-05		29.1512	27.2649	7.94803
63	2022-03-07 10:49:22	2336170	8.39466e-11	1.02698e-10	6.9624e-07	7.85395e-12	1.15184e-10	5.43974e-11	2.05396e-13	6.92759e-07	3.99688e-11	7.81302e-05	2.95007e-07	1.12805e-05	5.74067e-05		33.9344	28.109	9.53862
64	2022-03-07 10:49:57	2371816	6.65853e-11	9.81619e-11	6.99644e-07	6.71767e-12	1.04236e-10	4.31473e-11	1.96324e-13	6.96146e-07	3.61699e-11	6.16703e-05	2.80605e-07	9.60155e-06	5.16976e-05		36.5929	26.9778	9.87195
65	2022-03-07 10:50:33	2407461	5.41261e-11	9.45793e-11	7.09498e-07	6.55999e-10	8.28686e-10	3.50737e-11	1.89159e-13	7.05951e-07	2.87554e-10	4.94345e-05	2.66609e-07	0.000924596	0.000405292		95.7993	82.0131	78.568
66	2022-03-07 10:51:19	2453967	1.37351e-08	3.3111e-10	6.69544e-07	4.87869e-10	6.49085e-10	8.90034e-09	6.6222e-13	6.66196e-07	2.25232e-10	0.0132931	9.89061e-07	0.000728659	0.000336397		6.32361	81.201	5.13484
67	2022-03-07 10:51:52	2486481	2.75501e-08	2.81107e-10	6.71963e-07	4.27971e-10	6.39351e-10	1.78525e-08	5.62214e-13	6.68603e-07	2.21855e-10	0.0265676	8.36674e-07	0.000636897	0.000330159		2.93165	79.3745	2.32699
68	2022-03-07 10:52:21	2515426	2.78209e-08	2.87372e-10	6.71694e-07	4.53664e-10	6.07669e-10	1.80279e-08	5.74744e-13	6.68336e-07	2.10861e-10	0.0268395	8.55663e-07	0.000675403	0.000313924		3.00948	81.1009	2.44072
69	2022-03-07 10:52:46	2540801	2.80876e-08	1.96253e-10	7.11828e-07	4.52865e-11	2.49736e-10	1.82008e-08	3.92506e-13	7.08269e-07	8.66584e-11	0.025569	5.51406e-07	6.362e-05	0.000121741		0.485588	50.9914	0.247608
70	2022-03-07 10:53:16	2570716	1.31537e-09	1.2689e-10	7.22578e-07	2.6919e-11	1.93678e-10	8.5236e-10	2.5378e-13	7.18965e-07	6.72063e-11	0.00117961	3.51215e-07	3.72541e-05	9.3009e-05		6.64276	44.3849	2.94838
71	2022-03-07 10:53:53	2607272	7.56347e-10	1.16724e-10	7.24728e-07	2.02583e-11	1.65329e-10	4.90113e-10	2.33448e-13	7.21104e-07	5.73692e-11	0.000676271	3.22118e-07	2.7953e-05	7.91596e-05		9.09906	41.2932	3.7573
72	2022-03-07 10:54:28	2642920	5.37982e-10	1.08031e-10	7.2634e-07	1.68742e-11	1.74236e-10	3.48612e-10	2.16062e-13	7.22708e-07	6.04599e-11	0.000479958	2.97467e-07	2.32318e-05	8.32391e-05		11.9276	35.7412	4.26305
73	2022-03-07 10:55:04	2678566	6.07503e-10	2.26026e-10	1.23826e-08	2.72652e-11	2.82423e-10	3.93662e-10	4.52052e-13	1.23207e-08	9.80008e-11	0.0317915	3.6507e-05	0.0022019	0.00791439		16.2695	35.6447	5.79921
74	2022-03-07 10:55:41	2715231	4.15024e-10	2.36428e-10	5.83062e-09	2.25341e-11	2.55308e-10	2.68936e-10	4.72856e-13	5.80147e-09	8.85919e-11	0.0461247	8.10988e-05	0.00386479	0.0151942		19.9601	33.5997	6.70654
75	2022-03-07 10:56:20	2754496	3.46106e-10	2.34984e-10	3.82372e-09	1.94069e-11	2.30223e-10	2.24277e-10	4.69968e-13	3.8046e-09	7.98874e-11	0.0586541	0.000122909	0.0050754	0.0208926		20.991	32.5698	6.83673
76	2022-03-07 10:56:58	2792741	2.65524e-10	2.4295e-10	2.96481e-09	1.70086e-11	2.09946e-10	1.7206e-10	4.859e-13	2.94999e-09	7.28513e-11	0.0580339	0.000163889	0.00573683	0.024572		23.7787	31.6868	7.53471
77	2022-03-07 10:57:36	2830986	2.62632e-10	2.27879e-10	2.54543e-09	1.49414e-11	1.99931e-10	1.70186e-10	4.55758e-13	2.5327e-09	6.93761e-11	0.0668592	0.00017905	0.00586989	0.0272551		22.658	29.9683	6.79022
78	2022-03-07 10:58:15	2869231	2.03905e-10	2.41926e-10	2.30242e-09	1.37793e-11	1.88476e-10	1.3213e-10	4.83852e-13	2.29091e-09	6.54012e-11	0.0573876	0.000210149	0.0059847	0.0284054		26.1231	29.4922	7.70429
79	2022-03-07 10:58:52	2906436	1.84684e-10	2.25851e-10	2.16443e-09	1.27731e-11	1.78148e-10	1.19675e-10	4.51702e-13	2.15361e-09	6.18174e-11	0.0552918	0.000208693	0.00590137	0.0285606		26.8412	29.0908	7.80834
80	2022-03-07 10:59:30	2944681	1.77901e-10	2.40502e-10	2.0677e-09	1.21012e-11	1.71227e-10	1.1528e-10	4.81004e-13	2.05736e-09	5.94158e-11	0.0557527	0.000232628	0.00585249	0.0287352		26.7271	28.7784	7.69163
81	2022-03-07 11:00:08	2982926	1.40652e-10	2.30305e-10	2.02088e-09	1.16433e-11	1.64355e-10	9.11425e-11	4.6061e-13	2.01078e-09	5.70312e-11	0.0451004	0.000227925	0.0057615	0.028221		30.7068	28.8278	8.85209
82	2022-03-07 11:00:47	3021171	1.37836e-10	2.42847e-10	1.8944e-09	1.08424e-11	1.58092e-10	8.93177e-11	4.85694e-13	1.88493e-09	5.48579e-11	0.0471483	0.000256384	0.0057234	0.0289579		30.1288	28.1517	8.48176
83	2022-03-07 11:01:25	3059416	1.56949e-10	2.27848e-10	1.85207e-09	1.01877e-11	1.58438e-10	1.01703e-10	4.55696e-13	1.84281e-09	5.4978e-11	0.0549131	0.000246047	0.00550071	0.0296846		27.1508	26.8773	7.29739
84	2022-03-07 11:02:03	3097661	1.3632e-10	2.31729e-10	1.84558e-09	1.01243e-11	1.50764e-10	8.83354e-11	4.63458e-13	1.83635e-09	5.23151e-11	0.0478632	0.000251118	0.0054857	0.0283462		29.2462	27.7275	8.10924
85	2022-03-07 11:02:41	3135906	1.32439e-10	2.37963e-10	1.80915e-09	9.58578e-12	1.4858e-10	8.58205e-11	4.75926e-13	1.8001e-09	5.15573e-11	0.0474369	0.000263066	0.0052985	0.0284981		29.321	26.9246	7.89454
86	2022-03-07 11:03:20	3174151	1.26344e-10	2.27787e-10	1.78605e-09	9.54063e-12	1.43921e-10	8.18709e-11	4.55574e-13	1.77712e-09	4.99406e-11	0.0458391	0.000255073	0.00534175	0.0279615		29.7906	27.464	8.18168
87	2022-03-07 11:03:58	3212396	1.24732e-10	2.31902e-10	1.75538e-09	8.92143e-12	1.41579e-10	8.08263e-11	4.63804e-13	1.7466e-09	4.91279e-11	0.0460449	0.000264219	0.00508234	0.0279871		29.4362	26.4595	7.78867
88	2022-03-07 11:04:36	3250641	1.20324e-10	2.16012e-10	1.74319e-09	8.7978e-12	1.39289e-10	7.797e-11	4.32024e-13	1.73447e-09	4.83333e-11	0.0447283	0.000247835	0.00504695	0.0277269		29.8519	26.515	7.91522
89	2022-03-07 11:05:14	3288886	1.24248e-10	2.49532e-10	1.69179e-09	8.7978e-12	1.35138e-10	8.05127e-11	4.99064e-13	1.68333e-09	4.68929e-11	0.0475902	0.000294992	0.00520029	0.0277179		28.7539	27.0753	7.78522
90	2022-03-07 11:05:53	3327131	1.11853e-10	2.37144e-10	1.65706e-09	8.6817e-12	1.33516e-10	7.24807e-11	4.74288e-13	1.64877e-09	4.63301e-11	0.0437406	0.000286223	0.00523922	0.0279592		30.6833	27.0594	8.30271
91	2022-03-07 11:06:31	3365376	1.22066e-10	2.38383e-10	1.65569e-09	8.16355e-12	1.29619e-10	7.90988e-11	4.76766e-13	1.64741e-09	4.49778e-11	0.0477739	0.000287956	0.0049306	0.0271656		28.0852	26.4271	7.42211
92	2022-03-07 11:07:09	3403621	1.10499e-10	2.29507e-10	1.63452e-09	7.88405e-12	1.284e-10	7.16034e-11	4.59014e-13	1.62635e-09	4.45548e-11	0.043807	0.000280825	0.00482346	0.0272586		29.7967	25.9421	7.72989
93	2022-03-07 11:07:47	3441866	1.07005e-10	2.14078e-10	1.63558e-09	7.9378e-12	1.29399e-10	6.93392e-11	4.28156e-13	1.6274e-09	4.49015e-11	0.0423943	0.000261776	0.0048532	0.0274529		30.6204	25.9383	7.94242
94	2022-03-07 11:08:26	3480111	1.0479e-10	2.17497e-10	1.61082e-09	7.9765e-12	1.28491e-10	6.79039e-11	4.34994e-13	1.60277e-09	4.45864e-11	0.0421549	0.000270045	0.00495183	0.0276793		30.9857	26.1635	8.10693
95	2022-03-07 11:09:04	3518356	9.35463e-11	2.23579e-10	1.61282e-09	7.60025e-12	1.2554e-10	6.0618e-11	4.47158e-13	1.60476e-09	4.35624e-11	0.0375851	0.000277252	0.0047124	0.0270101		32.8132	25.6722	8.42385
96	2022-03-07 11:09:42	3556601	9.56103e-11	2.07371e-10	6.85401e-07	5.4567e-12	1.06622e-10	6.19555e-11	4.14742e-13	6.81974e-07	3.69978e-11	9.0393e-05	6.05109e-07	7.96132e-06	5.39798e-05		28.0578	22.5829	6.33627
97	2022-03-07 11:10:22	3596390	8.89346e-11	1.14728e-10	6.99823e-07	5.80392e-12	1.10283e-10	5.76296e-11	2.29456e-13	6.96324e-07	3.82682e-11	8.23489e-05	3.27877e-07	8.29341e-06	5.46827e-05		30.3	23.1668	7.01954
98	2022-03-07 11:10:58	3632036	6.74776e-11	9.93705e-11	7.02601e-07	5.17612e-12	9.88229e-11	4.37255e-11	1.98741e-13	6.99088e-07	3.42915e-11	6.22337e-05	2.82865e-07	7.36708e-06	4.88066e-05		33.8962	23.0858	7.82521
99	2022-03-07 11:11:33	3667681	4.76331e-11	9.51219e-11	7.11111e-07	5.98863e-10	6.96931e-10	3.08662e-11	1.90244e-13	7.07555e-07	2.41835e-10	4.34057e-05	2.6753e-07	0.000842151	0.000340081		95.8886	83.1898	79.7695
100	2022-03-07 11:12:16	3710618	2.64046e-08	2.83482e-10	6.73397e-07	3.7877e-10	5.06926e-10	1.71102e-08	5.66964e-13	6.7003e-07	1.75903e-10	0.0254088	8.41946e-07	0.000562477	0.000261218		2.65688	81.1062	2.1549
101	2022-03-07 11:12:41	3735992	2.73687e-08	2.54037e-10	6.73934e-07	3.9818e-10	4.87282e-10	1.77349e-08	5.08074e-13	6.70564e-07	1.69087e-10	0.0263155	7.53893e-07	0.000590829	0.000250895		2.65112	82.4428	2.18565
102	2022-03-07 11:13:07	3761369	2.79062e-08	2.30356e-10	6.74651e-07	4.28502e-10	4.73691e-10	1.80832e-08	4.60712e-13	6.71278e-07	1.64371e-10	0.0268038	6.82889e-07	0.000635146	0.000243638		2.74774	83.8691	2.3045
103	2022-03-07 11:13:32	3786744	2.78209e-08	2.28166e-10	6.73665e-07	4.31761e-10	4.60033e-10	1.80279e-08	4.56332e-13	6.70297e-07	1.59631e-10	0.026761	6.77387e-07	0.000640914	0.00023696		2.76058	84.3605	2.32884
104	2022-03-07 11:14:00	3814710	2.71544e-09	1.17318e-10	7.24728e-07	2.89734e-11	1.86071e-10	1.75961e-09	2.34636e-13	7.21104e-07	6.45666e-11	0.00242795	3.23757e-07	3.99783e-05	8.90909e-05		3.37039	47.2079	1.59109
105	2022-03-07 11:14:30	3844136	1.04214e-09	1.11462e-10	7.26251e-07	2.10807e-11	1.63069e-10	6.75307e-10	2.22924e-13	7.2262e-07	5.65849e-11	0.000929853	3.06952e-07	2.90267e-05	7.79138e-05		6.82743	42.6005	2.90852
106	2022-03-07 11:15:06	3880692	6.64886e-10	1.01797e-10	7.28043e-07	1.65066e-11	1.42068e-10	4.30846e-10	2.03594e-13	7.24403e-07	4.92976e-11	0.000591787	2.79646e-07	2.26726e-05	6.77125e-05		8.73902	40.009	3.4964
107	2022-03-07 11:15:42	3916340	4.93026e-10	1.53745e-10	4.49298e-08	2.99484e-11	3.34258e-10	3.19481e-10	3.0749e-13	4.47052e-08	1.15988e-10	0.00711067	6.84379e-06	0.00066656	0.00258153		21.6146	33.9952	7.34792
108	2022-03-07 11:16:19	3953006	4.87683e-10	2.16545e-10	8.81375e-09	2.2146e-11	2.6613e-10	3.16019e-10	4.3309e-13	8.76968e-09	9.23471e-11	0.0358552	4.9138e-05	0.00251266	0.0104776		17.8222	32.3129	5.75887
109	2022-03-07 11:16:55	3989151	3.75937e-10	2.2406e-10	4.82773e-09	1.86437e-11	2.33458e-10	2.43607e-10	4.4812e-13	4.80359e-09	8.10099e-11	0.05046	9.28221e-05	0.00386179	0.0167801		19.5963	31.4011	6.15344
110	2022-03-07 11:17:34	4028416	3.07438e-10	2.19596e-10	3.39477e-09	1.58401e-11	2.19952e-10	1.9922e-10	4.39192e-13	3.3778e-09	7.63233e-11	0.0586843	0.000129373	0.00466603	0.0224826		21.3941	29.2138	6.25001
111	2022-03-07 11:18:12	4066661	2.60343e-10	2.36141e-10	2.74088e-09	1.41921e-11	1.99994e-10	1.68702e-10	4.72282e-13	2.72718e-09	6.93979e-11	0.0615504	0.00017231	0.00517794	0.0253196		22.5531	28.8885	6.51523
112	2022-03-07 11:18:50	4104906	2.25566e-10	2.37861e-10	2.42279e-09	1.3044e-11	1.85433e-10	1.46167e-10	4.75722e-13	2.41068e-09	6.43453e-11	0.0603299	0.000196353	0.00538388	0.0265583		23.721	28.6968	6.80718
113	2022-03-07 11:19:29	4143151	2.07571e-10	2.24418e-10	2.17448e-09	1.14444e-11	1.76141e-10	1.34506e-10	4.48836e-13	2.16361e-09	6.11209e-11	0.0618566	0.000206411	0.00526305	0.0281083		23.8941	27.1006	6.47545
114	2022-03-07 11:20:07	4181396	1.89855e-10	2.25207e-10	2.09918e-09	1.07607e-11	1.6578e-10	1.23026e-10	4.50414e-13	2.08868e-09	5.75257e-11	0.0586067	0.000214567	0.00512614	0.0274039		24.4195	27.0718	6.61079
115	2022-03-07 11:20:45	4219641	1.67022e-10	2.27981e-10	2.00999e-09	9.87388e-12	1.60117e-10	1.0823e-10	4.55962e-13	1.99994e-09	5.55606e-11	0.0538462	0.000226848	0.0049124	0.0276422		25.9267	26.0647	6.75773
116	2022-03-07 11:21:23	4257886	1.67334e-10	2.37779e-10	1.95115e-09	9.32025e-12	1.5636e-10	1.08432e-10	4.75558e-13	1.94139e-09	5.42569e-11	0.0555736	0.000243732	0.0047768	0.0278077		25.2803	25.4051	6.42249
117	2022-03-07 11:22:02	4296131	1.40663e-10	2.24551e-10	1.86738e-09	9.15685e-12	1.50491e-10	9.11496e-11	4.49102e-13	1.85804e-09	5.22204e-11	0.0488115	0.000240498	0.00490358	0.0279645		28.0253	25.8001	7.23055
118	2022-03-07 11:22:40	4334376	1.27419e-10	2.37267e-10	4.41738e-09	1.32386e-11	1.91475e-10	8.25675e-11	4.74534e-13	4.39529e-09	6.64418e-11	0.0186915	0.000107424	0.00299693	0.015041		36.125	28.3501	10.2415
119	2022-03-07 11:23:18	4372621	2.16117e-10	2.23067e-10	2.18395e-09	1.22292e-11	1.85596e-10	1.40044e-10	4.46134e-13	2.17303e-09	6.44018e-11	0.0641241	0.000204278	0.00559958	0.0294887		24.1764	27.3871	6.62122
120	2022-03-07 11:23:56	4410866	2.15666e-10	2.38844e-10	2.25368e-09	1.17906e-11	1.8347e-10	1.39752e-10	4.77688e-13	2.24241e-09	6.36641e-11	0.0620104	0.000211959	0.00523171	0.0282489		23.888	26.8814	6.42144
121	2022-03-07 11:24:35	4449111	2.35231e-10	2.33039e-10	2.27989e-09	1.18959e-11	1.83643e-10	1.5243e-10	4.66078e-13	2.26849e-09	6.37241e-11	0.0668584	0.00020443	0.00521775	0.0279505		22.3963	27.0417	6.05634
122	2022-03-07 11:25:13	4487356	1.11627e-10	2.3996e-10	8.48325e-09	5.44595e-12	2.39063e-10	7.23343e-11	4.7992e-13	8.44083e-09	8.29549e-11	0.00852672	5.65727e-05	0.000641965	0.00977867		39.468	11.547	4.55737
123	2022-03-07 11:25:51	4525601	1.61142e-11	2.18551e-10	8.70675e-09	5.54162e-12	2.52519e-10	1.0442e-11	4.37102e-13	8.66322e-09	8.76241e-11	0.0011993	5.02027e-05	0.000636474	0.0100639		82.6008	11.1789	9.23385
124	2022-03-07 11:26:29	4563846	8.62471e-11	2.19156e-10	5.37529e-09	9.36218e-12	2.08751e-10	5.58881e-11	4.38312e-13	5.34841e-09	7.24366e-11	0.0103972	8.1542e-05	0.00174171	0.0134758		45.0395	20.4416	9.20679
125	2022-03-07 11:27:08	4602091	2.10914e-10	2.29824e-10	2.11022e-09	9.56535e-12	1.49099e-10	1.36672e-10	4.59648e-13	2.09967e-09	5.17374e-11	0.0647668	0.00021782	0.00453287	0.0245175		20.6944	26.8209	5.5504
126	2022-03-07 11:27:46	4640336	1.21464e-10	2.24459e-10	1.83134e-09	7.66045e-12	1.28324e-10	7.87087e-11	4.48918e-13	1.82218e-09	4.45284e-11	0.0429787	0.000245131	0.00418298	0.0243147		27.6959	25.4085	7.03712
127	2022-03-07 11:28:24	4678581	1.1682e-10	2.26487e-10	1.81359e-09	6.81012e-12	1.25636e-10	7.56994e-11	4.52974e-13	1.80452e-09	4.35957e-11	0.0417401	0.000249766	0.00375505	0.0240383		27.5839	23.618	6.51475
128	2022-03-07 11:29:02	4716826	9.47288e-11	2.23814e-10	1.83332e-09	6.67467e-12	1.19143e-10	6.13843e-11	4.47628e-13	1.82415e-09	4.13426e-11	0.0334826	0.000244163	0.00364076	0.0225507		30.9933	24.2101	7.5035
129	2022-03-07 11:29:41	4755071	9.31163e-11	2.39652e-10	1.79651e-09	6.4629e-12	1.22833e-10	6.03394e-11	4.79304e-13	1.78753e-09	4.26231e-11	0.033587	0.000266797	0.00359748	0.0237255		31.7068	23.0702	7.31483
130	2022-03-07 11:30:19	4793316	9.74055e-11	2.38629e-10	1.80029e-09	6.3339e-12	1.19114e-10	6.31188e-11	4.77258e-13	1.79129e-09	4.13326e-11	0.0350603	0.000265101	0.00351827	0.0229588		30.1456	23.2532	7.00982
131	2022-03-07 11:30:57	4831561	9.05363e-11	1.53284e-10	6.47865e-07	4.6999e-12	1.09309e-10	5.86675e-11	3.06568e-13	6.44626e-07	3.79302e-11	9.05552e-05	4.73197e-07	7.25444e-06	5.85465e-05		28.8756	19.7323	5.69783
132	2022-03-07 11:31:37	4871350	7.45618e-11	1.00394e-10	6.71694e-07	4.99767e-12	1.03992e-10	4.8316e-11	2.00788e-13	6.68336e-07	3.60852e-11	7.19316e-05	2.98928e-07	7.4404e-06	5.37227e-05		32.3842	21.5969	6.99398
133	2022-03-07 11:32:12	4906996	6.21564e-11	8.33789e-11	6.72322e-07	4.39997e-12	9.50557e-11	4.02773e-11	1.66758e-13	6.6896e-07	3.29843e-11	5.99078e-05	2.48033e-07	6.54444e-06	4.90603e-05		34.2441	20.9767	7.18329
134	2022-03-07 11:32:48	4942641	4.94176e-11	8.34096e-11	6.5763e-07	4.74618e-10	4.54409e-10	3.20226e-11	1.66819e-13	6.54342e-07	1.5768e-10	4.8694e-05	2.53667e-07	0.00072171	0.00023977		94.5313	85.7421	81.0531
135	2022-03-07 11:33:31	4985168	1.73968e-08	2.40001e-10	6.46343e-07	4.3359e-10	3.78251e-10	1.12731e-08	4.80002e-13	6.43111e-07	1.31253e-10	0.0174414	7.42643e-07	0.000670836	0.00020307		4.24254	86.8124	3.68305
136	2022-03-07 11:33:58	5012084	1.98303e-08	2.15234e-10	6.53688e-07	4.44111e-10	3.56823e-10	1.285e-08	4.30468e-13	6.5042e-07	1.23818e-10	0.0196577	6.58522e-07	0.000679393	0.000189414		3.79024	87.7282	3.32511
137	2022-03-07 11:34:25	5039001	2.33919e-08	1.90981e-10	6.58257e-07	4.54781e-10	3.40132e-10	1.5158e-08	3.81962e-13	6.54966e-07	1.18026e-10	0.0230274	5.80263e-07	0.000690887	0.0001793		3.27965	88.4814	2.90188
138	2022-03-07 11:34:51	5065916	2.52899e-08	1.8322e-10	6.59063e-07	1.17436e-10	2.18902e-10	1.63879e-08	3.6644e-13	6.55768e-07	7.5959e-11	0.0248654	5.56001e-07	0.000178186	0.000115253		0.940546	75.4736	0.709864
139	2022-03-07 11:35:21	5095422	1.89199e-09	9.96571e-11	6.98122e-07	2.83015e-11	1.425e-10	1.22601e-09	1.99314e-13	6.94631e-07	4.94475e-11	0.00175615	2.85501e-07	4.05395e-05	7.08293e-05		4.15319	53.2735	2.21255
140	2022-03-07 11:35:57	5131977	7.83211e-10	1.01295e-10	6.97494e-07	1.85104e-11	1.22684e-10	5.07521e-10	2.0259e-13	6.94007e-07	4.25713e-11	0.000727635	2.90454e-07	2.65384e-05	6.10347e-05		7.28828	46.395	3.3814
141	2022-03-07 11:36:33	5167625	5.39724e-10	9.68724e-11	6.96598e-07	1.49898e-11	1.1432e-10	3.49741e-10	1.93745e-13	6.93115e-07	3.9669e-11	0.00050207	2.7813e-07	2.15186e-05	5.69468e-05		9.0784	42.9247	3.89687
142	2022-03-07 11:37:09	5203271	5.89539e-10	2.05396e-10	1.76635e-08	1.86931e-11	2.23989e-10	3.82021e-10	4.10792e-13	1.75752e-08	7.77242e-11	0.0216277	2.32565e-05	0.00105829	0.00440027		13.1339	32.3631	4.25054
143	2022-03-07 11:37:45	5239936	3.90557e-10	2.10873e-10	6.09388e-09	1.71161e-11	1.98405e-10	2.53081e-10	4.21746e-13	6.06341e-09	6.88465e-11	0.0415303	6.92081e-05	0.00280874	0.0112977		16.9767	33.0744	5.61494
144	2022-03-07 11:38:25	5279201	3.19048e-10	2.13678e-10	3.95197e-09	1.57906e-11	1.79851e-10	2.06743e-10	4.27356e-13	3.93221e-09	6.24083e-11	0.0523139	0.000108137	0.00399563	0.0157917		18.5895	33.4487	6.21796
145	2022-03-07 11:39:03	5317446	2.63202e-10	2.20333e-10	3.11572e-09	1.38804e-11	1.69211e-10	1.70555e-10	4.40666e-13	3.10014e-09	5.87162e-11	0.0547401	0.000141433	0.00445496	0.0188452		20.3066	31.9392	6.48575
146	2022-03-07 11:39:41	5355691	2.26136e-10	2.30694e-10	2.71518e-09	1.25151e-11	1.59532e-10	1.46536e-10	4.61388e-13	2.7016e-09	5.53576e-11	0.0539692	0.000169929	0.00460931	0.0203882		21.622	30.9591	6.69397
147	2022-03-07 11:40:19	5393936	2.05227e-10	2.18829e-10	2.4965e-09	1.18454e-11	1.52477e-10	1.32987e-10	4.37658e-13	2.48402e-09	5.29095e-11	0.0532694	0.000175309	0.0047448	0.0211935		22.4593	30.7521	6.90669
148	2022-03-07 11:40:58	5432181	1.84319e-10	2.1677e-10	2.34931e-09	1.04049e-11	1.46852e-10	1.19439e-10	4.3354e-13	2.33756e-09	5.09576e-11	0.0508399	0.000184539	0.00442892	0.0216905		23.2099	28.822	6.68957
149	2022-03-07 11:41:36	5470426	1.58207e-10	2.14529e-10	2.2021e-09	9.9803e-12	1.5193e-10	1.02518e-10	4.29058e-13	2.19109e-09	5.27197e-11	0.0465547	0.00019484	0.00453217	0.0239407		26.2846	27.3024	7.17631
150	2022-03-07 11:42:14	5508671	1.67678e-10	2.1893e-10	2.13304e-09	9.19663e-12	1.63294e-10	1.08655e-10	4.3786e-13	2.12237e-09	5.6663e-11	0.0509392	0.000205275	0.00431151	0.0265644		25.7831	24.3638	6.28175
151	2022-03-07 11:42:52	5546916	1.24904e-10	2.31533e-10	2.09234e-09	8.18075e-12	1.8694e-10	8.09378e-11	4.63066e-13	2.08188e-09	6.48682e-11	0.0386829	0.000221315	0.00390986	0.0310027		33.54	20.0281	6.71742
152	2022-03-07 11:43:31	5585161	1.34654e-10	2.14098e-10	1.98247e-09	7.0692e-12	2.23441e-10	8.72558e-11	4.28196e-13	1.97256e-09	7.7534e-11	0.0440137	0.000215991	0.00356585	0.0391098		34.5448	15.351	5.30298
153	2022-03-07 11:44:09	5623406	9.66853e-11	2.2919e-10	1.96043e-09	6.34572e-12	2.52644e-10	6.26521e-11	4.5838e-13	1.95063e-09	8.76675e-11	0.0319583	0.000233816	0.0032369	0.0447185		44.5855	12.5886	5.61267
154	2022-03-07 11:44:47	5661651	4.57304e-11	2.32384e-10	1.92863e-09	5.30942e-12	2.55082e-10	2.96333e-11	4.64768e-13	1.91899e-09	8.85135e-11	0.0153649	0.000240983	0.00275295	0.0458945		62.6934	10.6618	6.68425
155	2022-03-07 11:45:25	5699896	7.16916e-11	2.57866e-10	1.88951e-09	5.4481e-12	2.42355e-10	4.64562e-11	5.15732e-13	1.88006e-09	8.40972e-11	0.0245864	0.000272945	0.00288334	0.0445074		50.6891	11.4085	5.78289
156	2022-03-07 11:46:04	5738141	5.31694e-11	2.79356e-10	1.88221e-09	5.36962e-12	2.22549e-10	3.44538e-11	5.58712e-13	1.8728e-09	7.72245e-11	0.018305	0.000296838	0.00285283	0.0410286		56.2297	12.1317	6.8216
157	2022-03-07 11:46:42	5776386	6.75206e-11	3.01675e-10	1.84531e-09	5.35672e-12	2.08349e-10	4.37533e-11	6.0335e-13	1.83608e-09	7.22971e-11	0.0237106	0.000326964	0.00290288	0.0391788		48.8626	12.813	6.26075
158	2022-03-07 11:47:20	5814631	4.76116e-11	3.16981e-10	1.84637e-09	5.3879e-12	1.96893e-10	3.08523e-11	6.33962e-13	1.83714e-09	6.83219e-11	0.0167097	0.000343356	0.0029181	0.0370033		56.3728	13.5151	7.61884
159	2022-03-07 11:47:58	5852876	6.76926e-11	2.98102e-10	1.82712e-09	5.43412e-12	1.84434e-10	4.38648e-11	5.96204e-13	1.81798e-09	6.39986e-11	0.0240076	0.000326308	0.00297415	0.035027		46.2417	14.4021	6.65976
160	2022-03-07 11:48:37	5891121	7.10251e-11	2.97139e-10	1.82158e-09	5.77382e-12	1.75634e-10	4.60243e-11	5.94278e-13	1.81247e-09	6.0945e-11	0.0252661	0.000326243	0.00316968	0.0334572		44.2588	15.7999	6.99283
161	2022-03-07 11:49:15	5929366	6.96813e-11	2.72466e-10	1.78838e-09	5.676e-12	1.65248e-10	4.51535e-11	5.44932e-13	1.77944e-09	5.73411e-11	0.0252483	0.000304707	0.00317382	0.0320631		43.3972	16.3956	7.11524
162	2022-03-07 11:49:53	5967611	8.58493e-11	2.6579e-10	1.77471e-09	6.05655e-12	1.61432e-10	5.56303e-11	5.3158e-13	1.76584e-09	5.60169e-11	0.0313462	0.000299531	0.0034127	0.031564		38.1618	17.6417	6.73241
163	2022-03-07 11:50:31	6005856	7.42608e-11	2.7224e-10	1.81629e-09	6.1447e-12	1.54152e-10	4.8121e-11	5.4448e-13	1.80721e-09	5.34907e-11	0.0264941	0.000299776	0.00338311	0.0294506		40.7984	18.5292	7.55961
164	2022-03-07 11:51:10	6044101	7.38631e-11	2.56596e-10	1.77765e-09	6.02967e-12	1.50764e-10	4.78633e-11	5.13192e-13	1.76876e-09	5.23151e-11	0.026925	0.000288691	0.00339193	0.0294294		40.3997	18.585	7.50826
165	2022-03-07 11:51:48	6082346	7.74106e-11	2.47843e-10	3.82699e-07	4.86545e-12	1.46282e-10	5.01621e-11	4.95686e-13	3.80786e-07	5.07599e-11	0.000131074	1.29524e-06	1.27135e-05	0.000132636		37.8068	15.9558	6.0324
166	2022-03-07 11:52:28	6122135	5.61149e-11	1.49598e-10	6.61482e-07	4.96327e-12	1.30426e-10	3.63625e-11	2.99196e-13	6.58175e-07	4.52578e-11	5.49712e-05	4.52312e-07	7.50326e-06	6.84188e-05		43.276	17.891	7.7425
167	2022-03-07 11:53:03	6157781	4.44189e-11	1.2217e-10	6.63901e-07	4.53865e-12	1.14646e-10	2.87834e-11	2.4434e-13	6.60581e-07	3.97822e-11	4.3355e-05	3.68037e-07	6.83634e-06	5.99218e-05		46.0331	18.4859	8.50965
168	2022-03-07 11:53:39	6193426	3.66466e-11	9.79886e-11	6.65244e-07	4.13875e-12	1.23654e-10	2.3747e-11	1.95977e-13	6.61918e-07	4.29079e-11	3.56967e-05	2.94594e-07	6.2214e-06	6.44995e-05		51.9658	16.1099	8.37165
169	2022-03-07 11:54:21	6235953	2.18715e-08	8.68055e-10	6.42222e-07	4.53037e-10	1.06516e-09	1.41727e-08	1.73611e-12	6.39011e-07	3.69611e-10	0.0220683	2.70329e-06	0.000705421	0.000575518		4.31228	70.93	3.0587
170	2022-03-07 11:54:52	6266439	2.50381e-08	5.7881e-10	6.35951e-07	3.25318e-10	6.99833e-10	1.62247e-08	1.15762e-12	6.32771e-07	2.42842e-10	0.0255125	1.8203e-06	0.000511546	0.000381857		2.68305	72.7264	1.95128
171	2022-03-07 11:55:22	6296515	2.02973e-08	4.33674e-10	6.34069e-07	4.17444e-10	6.93509e-10	1.31527e-08	8.67348e-13	6.30899e-07	2.40648e-10	0.0207432	1.36791e-06	0.000658357	0.000379529		3.9311	77.5628	3.04907
172	2022-03-07 11:55:53	6327001	2.33624e-08	3.35061e-10	6.49657e-07	9.14793e-11	3.36461e-10	1.51388e-08	6.70122e-13	6.46409e-07	1.16752e-10	0.0233028	1.0315e-06	0.000140812	0.000179713		0.982341	60.9089	0.598333
173	2022-03-07 11:56:22	6356507	1.67976e-09	1.59877e-10	6.85848e-07	2.70491e-11	2.10864e-10	1.08848e-09	3.19754e-13	6.82419e-07	7.31698e-11	0.00158706	4.66217e-07	3.94389e-05	0.000106685		5.53633	42.4008	2.34744
174	2022-03-07 11:56:59	6393062	7.48145e-10	1.28887e-10	6.90686e-07	1.79202e-11	1.73061e-10	4.84798e-10	2.57774e-13	6.87233e-07	6.00522e-11	0.000701908	3.73214e-07	2.59455e-05	8.69457e-05		9.02188	37.2754	3.36294
175	2022-03-07 11:57:34	6428710	5.24706e-10	1.19222e-10	6.89252e-07	1.44985e-11	1.511e-10	3.40009e-10	2.38444e-13	6.85806e-07	5.24317e-11	0.000493302	3.45946e-07	2.10351e-05	7.60704e-05		10.7219	35.5063	3.80695
176	2022-03-07 11:58:10	6464356	3.58952e-10	1.85145e-10	3.8504e-08	1.93306e-11	2.83839e-10	2.32601e-10	3.7029e-13	3.83115e-08	9.84921e-11	0.00604095	9.61692e-06	0.000502041	0.00255797		22.817	28.1124	6.4144
177	2022-03-07 11:58:47	6501021	3.60328e-10	2.09348e-10	7.0027e-09	1.6197e-11	2.56494e-10	2.33493e-10	4.18696e-13	6.96769e-09	8.90034e-11	0.0333432	5.97907e-05	0.00231296	0.0127099		20.6888	26.5925	5.50169
178	2022-03-07 11:59:26	6540286	2.87443e-10	2.10986e-10	4.33758e-09	1.31354e-11	2.59848e-10	1.86263e-10	4.21972e-13	4.31589e-09	9.01673e-11	0.0429417	9.72828e-05	0.00302828	0.0207875		23.8789	22.4806	5.36811
179	2022-03-07 12:00:04	6578531	2.35757e-10	2.10884e-10	3.26543e-09	1.08951e-11	2.74557e-10	1.52771e-10	4.21768e-13	3.2491e-09	9.52713e-11	0.0467842	0.000129162	0.0033365	0.0291757		27.7722	18.5475	5.15105
180	2022-03-07 12:00:42	6616776	1.7674e-10	2.21685e-10	2.77863e-09	9.82765e-12	2.78094e-10	1.14528e-10	4.4337e-13	2.76474e-09	9.64986e-11	0.0412173	0.000159564	0.00353687	0.0347288		33.7325	16.8574	5.68644
181	2022-03-07 12:01:21	6655021	1.49661e-10	2.38782e-10	2.55212e-09	8.27213e-12	2.71706e-10	9.69803e-11	4.77564e-13	2.53936e-09	9.4282e-11	0.0379999	0.000187124	0.00324128	0.0369426		36.4614	14.8641	5.41965
182	2022-03-07 12:01:59	6693266	1.44017e-10	2.43512e-10	2.38333e-09	7.45512e-12	2.61834e-10	9.3323e-11	4.87024e-13	2.37141e-09	9.08564e-11	0.0391566	0.000204346	0.00312803	0.0381216		36.2765	14.0327	5.09056
183	2022-03-07 12:02:37	6731511	1.25506e-10	2.2409e-10	2.30325e-09	7.02942e-12	2.46309e-10	8.13279e-11	4.4818e-13	2.29173e-09	8.54692e-11	0.0353101	0.000194586	0.00305196	0.0371081		38.067	14.0622	5.35306
184	2022-03-07 12:03:15	6769756	9.47181e-11	2.40021e-10	2.2072e-09	7.13692e-12	2.37834e-10	6.13773e-11	4.80042e-13	2.19616e-09	8.25284e-11	0.0278078	0.000217489	0.00323347	0.0373905		44.2118	14.6726	6.48702
185	2022-03-07 12:03:54	6808001	1.1224e-10	3.48289e-10	2.34692e-08	1.25882e-11	3.16391e-10	7.27315e-11	6.96578e-13	2.33519e-08	1.09788e-10	0.00309902	2.96805e-05	0.000536371	0.00467795		48.2566	18.5584	8.95563
186	2022-03-07 12:04:33	6847266	1.76858e-10	2.59258e-10	3.83703e-09	9.60083e-12	2.72849e-10	1.14604e-10	5.18516e-13	3.81784e-09	9.46786e-11	0.0298679	0.000135135	0.00250215	0.024675		33.2935	16.7848	5.58827
187	2022-03-07 12:05:12	6886531	1.29892e-10	2.39273e-10	2.63791e-09	7.6841e-12	2.1212e-10	8.417e-11	4.78546e-13	2.62472e-09	7.36056e-11	0.0319078	0.000181411	0.00291295	0.027903		34.6994	17.1803	5.96146
188	2022-03-07 12:05:50	6924776	1.01372e-10	2.43512e-10	2.32166e-09	6.5016e-12	1.74563e-10	6.56891e-11	4.87024e-13	2.31005e-09	6.05734e-11	0.028294	0.000209774	0.00280041	0.0260905		36.0509	17.5568	6.32939
189	2022-03-07 12:06:29	6963021	7.24871e-11	2.22084e-10	2.15425e-09	5.79747e-12	1.43249e-10	4.69716e-11	4.44168e-13	2.14348e-09	4.97074e-11	0.0218042	0.000206182	0.00269118	0.0230741		39.66	18.7783	7.44746
190	2022-03-07 12:07:07	7001266	5.67276e-11	2.19484e-10	2.0831e-09	5.23095e-12	1.29245e-10	3.67595e-11	4.38968e-13	2.07268e-09	4.4848e-11	0.0176465	0.000210728	0.00251114	0.0215295		43.1266	18.7661	8.0932
191	2022-03-07 12:07:45	7039511	3.90869e-11	2.13587e-10	2.06723e-09	4.92457e-12	1.2327e-10	2.53283e-11	4.27174e-13	2.05689e-09	4.27747e-11	0.0122523	0.000206641	0.00238221	0.0206918		51.1544	18.5654	9.49703
192	2022-03-07 12:08:23	7077756	5.76629e-11	2.36253e-10	1.99713e-09	4.99875e-12	1.20309e-10	3.73656e-11	4.72506e-13	1.98714e-09	4.17472e-11	0.0187096	0.000236593	0.00250297	0.0209036		41.1327	19.146	7.87525
193	2022-03-07 12:09:02	7116001	5.88561e-11	2.25411e-10	1.97611e-09	5.2245e-12	1.22996e-10	3.81388e-11	4.50822e-13	1.96623e-09	4.26796e-11	0.0192999	0.000228136	0.00264383	0.0215978		41.2604	19.5019	8.04655
194	2022-03-07 12:09:39	7153206	5.45454e-11	2.15091e-10	1.94332e-09	5.05895e-12	1.26956e-10	3.53454e-11	4.30182e-13	1.9336e-09	4.40537e-11	0.0181882	0.000221364	0.00260325	0.0226693		43.5794	18.5303	8.07541
195	2022-03-07 12:10:17	7191451	5.90066e-11	2.19842e-10	1.90359e-09	5.21805e-12	1.31559e-10	3.82363e-11	4.39684e-13	1.89407e-09	4.5651e-11	0.0200864	0.000230976	0.00274116	0.0239815		42.5015	18.4622	7.84673
196	2022-03-07 12:10:55	7229696	5.87809e-11	2.30694e-10	1.901e-09	5.46315e-12	1.32412e-10	3.809e-11	4.61388e-13	1.89149e-09	4.5947e-11	0.0200368	0.000242708	0.00287383	0.0241699		42.9426	19.0571	8.18359
197	2022-03-07 12:11:33	7267941	7.83351e-11	2.17405e-10	1.87332e-09	5.28255e-12	1.32815e-10	5.07611e-11	4.3481e-13	1.86395e-09	4.60868e-11	0.0270969	0.000232107	0.00281989	0.0246017		35.9921	18.5071	6.6611
198	2022-03-07 12:12:12	7306186	6.28121e-11	2.22688e-10	1.84771e-09	5.55667e-12	1.34461e-10	4.07022e-11	4.45376e-13	1.83847e-09	4.6658e-11	0.0220285	0.000241042	0.00300733	0.0252518		41.6962	19.0896	7.95964
199	2022-03-07 12:12:50	7344431	8.44733e-11	2.09992e-10	1.85514e-09	5.62332e-12	1.28487e-10	5.47387e-11	4.19984e-13	1.84586e-09	4.4585e-11	0.0295065	0.000226389	0.00303121	0.0240332		33.9419	19.9935	6.78616
200	2022-03-07 12:13:28	7382676	1.10187e-10	1.35644e-10	6.46611e-07	4.76117e-12	1.21691e-10	7.14012e-11	2.71288e-13	6.43378e-07	4.22268e-11	0.000110424	4.19554e-07	7.36327e-06	6.53048e-05		26.7014	18.305	4.88769
201	2022-03-07 12:14:08	7422465	5.93399e-11	1.1655e-10	6.47417e-07	5.3707e-12	1.33991e-10	3.84523e-11	2.331e-13	6.4418e-07	4.64949e-11	5.93933e-05	3.60046e-07	8.29558e-06	7.1816e-05		42.7683	18.6906	7.99367
202	2022-03-07 12:14:44	7458111	3.8544e-10	1.83701e-10	6.68648e-07	1.02555e-11	1.66457e-10	2.49765e-10	3.67402e-13	6.65305e-07	5.77606e-11	0.000373538	5.4947e-07	1.53377e-05	8.63841e-05		13.6014	26.0825	3.54758
203	2022-03-07 12:15:19	7493756	1.26032e-10	1.31671e-10	6.70978e-07	7.53682e-12	1.44702e-10	8.16687e-11	2.63342e-13	6.67623e-07	5.02116e-11	0.000121716	3.92475e-07	1.12326e-05	7.48334e-05		28.6381	22.9961	6.58565
204	2022-03-07 12:15:55	7529401	7.67226e-11	9.99333e-11	6.73127e-07	1.04135e-11	2.21781e-10	4.97162e-11	1.99867e-13	6.69761e-07	7.6958e-11	7.38586e-05	2.96923e-07	1.54703e-05	0.000114329		49.6334	21.2553	10.5497
205	2022-03-07 12:16:37	7571928	2.29632e-08	6.20325e-10	6.48223e-07	4.37003e-10	6.87232e-10	1.48802e-08	1.24065e-12	6.44982e-07	2.3847e-10	0.0229553	1.91392e-06	0.000674155	0.000367882		3.60729	78.4765	2.83088
206	2022-03-07 12:17:08	7602413	2.5599e-08	4.87087e-10	6.40519e-07	3.44526e-10	6.22699e-10	1.65882e-08	9.74174e-13	6.37316e-07	2.16077e-10	0.025898	1.52091e-06	0.000537886	0.000337346		2.65856	76.0457	2.02172
207	2022-03-07 12:17:38	7632899	1.95253e-08	3.74406e-10	6.50194e-07	4.35541e-10	5.45323e-10	1.26524e-08	7.48812e-13	6.46943e-07	1.89227e-10	0.0194594	1.15167e-06	0.000669863	0.000291032		4.02436	82.0956	3.30383
208	2022-03-07 12:18:05	7659816	2.17472e-08	3.12578e-10	6.51807e-07	1.16388e-10	3.05334e-10	1.40922e-08	6.25156e-13	6.48548e-07	1.05951e-10	0.0216202	9.59112e-07	0.000178562	0.000162549		1.18972	68.5943	0.816079
209	2022-03-07 12:18:35	7689322	1.86246e-09	1.4963e-10	6.91044e-07	2.63256e-11	1.81555e-10	1.20687e-09	2.9926e-13	6.87589e-07	6.29996e-11	0.00174645	4.33055e-07	3.80954e-05	9.11658e-05		4.58355	45.4085	2.08132
210	2022-03-07 12:19:11	7725877	7.66699e-10	1.31098e-10	6.92298e-07	1.70774e-11	1.48772e-10	4.96821e-10	2.62196e-13	6.88837e-07	5.16239e-11	0.00071764	3.78733e-07	2.46677e-05	7.45689e-05		7.96909	39.696	3.16341
211	2022-03-07 12:19:47	7761525	5.28092e-10	1.2989e-10	6.91582e-07	1.35331e-11	1.29293e-10	3.42204e-10	2.5978e-13	6.88124e-07	4.48647e-11	0.000494813	3.75632e-07	1.95683e-05	6.48725e-05		9.54148	37.4927	3.57736
212	2022-03-07 12:20:23	7797171	5.32564e-10	1.92096e-10	1.93449e-08	1.88716e-11	2.60779e-10	3.45101e-10	3.84192e-13	1.92482e-08	9.04903e-11	0.0178394	1.98601e-05	0.000975534	0.00467773		15.7077	29.3453	4.60946
213	2022-03-07 12:20:59	7833836	3.6265e-10	2.11426e-10	6.48709e-09	1.66549e-11	2.27003e-10	2.34997e-10	4.22852e-13	6.45465e-09	7.877e-11	0.0362254	6.51836e-05	0.00256739	0.0121426		19.3139	29.608	5.71845
214	2022-03-07 12:21:39	7873101	3.15952e-10	2.15757e-10	4.19768e-09	1.39019e-11	1.96174e-10	2.04737e-10	4.31514e-13	4.17669e-09	6.80724e-11	0.0487738	0.000102798	0.00331181	0.0162167		19.0414	28.8698	5.4972
215	2022-03-07 12:22:17	7911346	2.69394e-10	2.15214e-10	3.29822e-09	1.26495e-11	1.71674e-10	1.74567e-10	4.30428e-13	3.28173e-09	5.95709e-11	0.0529277	0.000130503	0.00383525	0.0180615		19.6348	29.6587	5.82343
216	2022-03-07 12:22:55	7949591	2.30081e-10	1.99581e-10	2.85843e-09	1.16508e-11	1.55625e-10	1.49092e-10	3.99162e-13	2.84414e-09	5.40019e-11	0.0521589	0.000139644	0.00407594	0.0188921		20.6718	29.9882	6.19909
217	2022-03-07 12:23:33	7987836	2.01927e-10	1.99458e-10	2.61358e-09	1.06607e-11	1.4763e-10	1.30849e-10	3.98916e-13	2.60051e-09	5.12276e-11	0.0500649	0.000152632	0.00407896	0.0196006		21.7986	29.2282	6.37134
218	2022-03-07 12:24:12	8026081	1.70688e-10	2.02672e-10	2.46313e-09	9.73305e-12	1.39534e-10	1.10606e-10	4.05344e-13	2.45081e-09	4.84183e-11	0.0449046	0.000164565	0.0039515	0.0196572		23.5887	28.5052	6.72401
219	2022-03-07 12:24:50	8064326	1.77944e-10	2.08313e-10	2.33387e-09	9.34068e-12	1.33132e-10	1.15308e-10	4.16626e-13	2.3222e-09	4.61968e-11	0.0494062	0.000178513	0.00400223	0.0197941		22.0657	28.6108	6.31319
220	2022-03-07 12:25:28	8102571	1.5997e-10	2.07904e-10	2.24946e-09	8.7978e-12	1.29044e-10	1.03661e-10	4.15808e-13	2.23821e-09	4.47783e-11	0.0460824	0.000184848	0.00391107	0.0199062		23.2459	28.0231	6.51422
221	2022-03-07 12:26:06	8140816	1.43963e-10	2.05692e-10	2.18081e-09	8.16462e-12	1.25276e-10	9.3288e-11	4.11384e-13	2.16991e-09	4.34708e-11	0.0427768	0.000188638	0.00374385	0.0199333		24.3981	27.1198	6.61672
222	2022-03-07 12:26:45	8179061	1.44694e-10	2.12931e-10	2.11123e-09	7.81633e-12	1.1848e-10	9.37617e-11	4.25862e-13	2.10067e-09	4.11126e-11	0.0444109	0.000201713	0.00370226	0.0194733		23.3643	27.3436	6.38864
223	2022-03-07 12:27:23	8217306	1.48027e-10	2.20026e-10	2.08393e-09	7.91092e-12	1.21754e-10	9.59215e-11	4.40052e-13	2.07351e-09	4.22486e-11	0.0460291	0.000211164	0.00379615	0.0202735		23.3712	27.041	6.3198
224	2022-03-07 12:28:01	8255551	1.45726e-10	2.04004e-10	2.05184e-09	6.7682e-12	1.13187e-10	9.44304e-11	4.08008e-13	2.04158e-09	3.92759e-11	0.0460223	0.00019885	0.0032986	0.0191418		21.9845	25.4347	5.59168
225	2022-03-07 12:28:39	8293796	1.11326e-10	2.13955e-10	2.01149e-09	7.12725e-12	1.10096e-10	7.21392e-11	4.2791e-13	2.00143e-09	3.82033e-11	0.0358636	0.000212733	0.00354327	0.0189925		26.8232	26.9534	7.22976
226	2022-03-07 12:29:18	8332041	1.13573e-10	2.13259e-10	1.96737e-09	6.9359e-12	1.08047e-10	7.35953e-11	4.26518e-13	1.95753e-09	3.74923e-11	0.037408	0.000216796	0.00352547	0.0190571		26.0279	26.7844	6.97141
227	2022-03-07 12:29:56	8370286	1.12133e-10	2.03666e-10	1.95108e-09	6.57147e-12	1.08911e-10	7.26622e-11	4.07332e-13	1.94132e-09	3.77921e-11	0.037242	0.000208773	0.00336812	0.0193698		26.1063	25.5986	6.68285
228	2022-03-07 12:30:34	8408531	8.93001e-11	2.16412e-10	1.91918e-09	6.50052e-12	1.07519e-10	5.78665e-11	4.32824e-13	1.90958e-09	3.73091e-11	0.0301517	0.000225525	0.00338713	0.0194401		30.4807	25.6214	7.80956
229	2022-03-07 12:31:12	8446776	1.05543e-10	2.20149e-10	1.90328e-09	6.4973e-12	1.04716e-10	6.83919e-11	4.40298e-13	1.89376e-09	3.63365e-11	0.0359337	0.000231336	0.00341374	0.0190915		26.6792	26.1086	6.96556
230	2022-03-07 12:31:51	8485021	9.67713e-11	2.16986e-10	1.85365e-09	6.35862e-12	1.0559e-10	6.27078e-11	4.33972e-13	1.84438e-09	3.66397e-11	0.0338294	0.000234118	0.00343032	0.0197663		28.4184	25.5413	7.25843
231	2022-03-07 12:32:29	8523266	9.45353e-11	2.03522e-10	1.86972e-09	5.88562e-12	9.93464e-11	6.12589e-11	4.07044e-13	1.86037e-09	3.44732e-11	0.0327637	0.000217703	0.00314786	0.0184376		27.5768	25.2323	6.95826
232	2022-03-07 12:33:07	8561511	1.15014e-10	2.10341e-10	1.86188e-09	6.09417e-12	1.02854e-10	7.45291e-11	4.20682e-13	1.85257e-09	3.56903e-11	0.0400289	0.000225945	0.00327313	0.019169		24.473	25.235	6.17577
233	2022-03-07 12:33:45	8599756	9.60403e-11	2.29067e-10	1.86367e-09	6.15115e-12	1.02336e-10	6.22341e-11	4.58134e-13	1.85435e-09	3.55106e-11	0.0333933	0.000245824	0.00330056	0.0190541		27.9444	25.4859	7.12189
234	2022-03-07 12:34:24	8638001	8.87841e-11	2.19176e-10	1.85873e-09	5.96517e-12	1.03037e-10	5.75321e-11	4.38352e-13	1.84944e-09	3.57538e-11	0.0309524	0.000235834	0.00320927	0.0192356		29.4892	24.7916	7.31085
235	2022-03-07 12:35:02	8676246	1.02952e-10	2.1805e-10	1.71641e-07	4.4118e-12	1.09626e-10	6.67129e-11	4.361e-13	1.70783e-07	3.80402e-11	0.000388677	2.54077e-06	2.57036e-05	0.000221627		26.1722	18.6546	4.88232
236	2022-03-07 12:35:42	8716035	8.09796e-11	9.75476e-11	6.60855e-07	4.11187e-12	9.4245e-11	5.24748e-11	1.95095e-13	6.57551e-07	3.2703e-11	7.94044e-05	2.95216e-07	6.22205e-06	4.94859e-05		28.1519	19.9985	5.62994
237	2022-03-07 12:36:17	8751681	7.36373e-11	7.8352e-11	6.65872e-07	3.81625e-12	8.87064e-11	4.7717e-11	1.56704e-13	6.62543e-07	3.07811e-11	7.16609e-05	2.35337e-07	5.73121e-06	4.62268e-05		28.7829	19.7885	5.69571
238	2022-03-07 12:36:53	8787326	3.61091e-11	8.0932e-11	6.69276e-07	3.37335e-12	8.16564e-11	2.33987e-11	1.61864e-13	6.6593e-07	2.83348e-11	3.49612e-05	2.41849e-07	5.0403e-06	4.23365e-05		42.9583	19.1432	8.2236
239	2022-03-07 12:37:35	8829853	2.0736e-08	2.04136e-10	6.49657e-07	4.22216e-10	2.38841e-10	1.34369e-08	4.08272e-13	6.46409e-07	8.28778e-11	0.0206831	6.28442e-07	0.000649906	0.000127572		3.33693	91.0225	3.03735
240	2022-03-07 12:38:02	8856769	2.26731e-08	1.6257e-10	6.50105e-07	4.28565e-10	2.27713e-10	1.46922e-08	3.2514e-13	6.46854e-07	7.90164e-11	0.0225997	5.00135e-07	0.000659224	0.000121544		3.08854	91.5276	2.82687
241	2022-03-07 12:38:29	8883686	2.4041e-08	1.52219e-10	6.4679e-07	4.33846e-10	2.17207e-10	1.55786e-08	3.04438e-13	6.43556e-07	7.53708e-11	0.024086	4.70691e-07	0.000670768	0.000116531		2.93879	91.9782	2.70305
242	2022-03-07 12:38:56	8910601	2.52691e-08	1.63e-10	6.45626e-07	4.26175e-10	2.03737e-10	1.63744e-08	3.26e-13	6.42398e-07	7.06967e-11	0.025362	5.04936e-07	0.000660096	0.000109501		2.74225	92.3083	2.53132
243	2022-03-07 12:39:20	8934266	1.31834e-08	1.02493e-10	6.80832e-07	3.87613e-11	1.31553e-10	8.54284e-09	2.04986e-13	6.77428e-07	4.56489e-11	0.0125477	3.01082e-07	5.69323e-05	6.70487e-05		0.716927	62.8342	0.450475
244	2022-03-07 12:39:49	8963772	1.15811e-09	8.96036e-11	6.84953e-07	2.0483e-11	1.13288e-10	7.50455e-10	1.79207e-13	6.81528e-07	3.93109e-11	0.00109563	2.61634e-07	2.99042e-05	5.73922e-05		5.08776	50.9172	2.59054
245	2022-03-07 12:40:26	9000327	6.72174e-10	9.30846e-11	6.88178e-07	1.50532e-11	1.0405e-10	4.35569e-10	1.86169e-13	6.84737e-07	3.61053e-11	0.00063293	2.70525e-07	2.1874e-05	5.24651e-05		7.08218	45.3424	3.21123
246	2022-03-07 12:41:01	9035975	4.87995e-10	9.41595e-11	6.87551e-07	1.7702e-11	2.01332e-10	3.16221e-10	1.88319e-13	6.84113e-07	6.98622e-11	0.000459923	2.73898e-07	2.57465e-05	0.00010161		14.2912	33.5728	4.79797
247	2022-03-07 12:41:37	9071621	4.45533e-10	2.16904e-10	9.92183e-09	1.70538e-11	1.95246e-10	2.88705e-10	4.33808e-13	9.87222e-09	6.77504e-11	0.029098	4.37226e-05	0.00171882	0.00682841		15.0495	33.3434	5.01802
248	2022-03-07 12:42:14	9108286	3.64273e-10	2.25401e-10	5.12497e-09	1.47694e-11	1.77394e-10	2.36049e-10	4.50802e-13	5.09935e-09	6.15557e-11	0.0460586	8.79619e-05	0.00288185	0.0120109		16.2417	32.2669	5.24069
249	2022-03-07 12:42:53	9147551	2.89099e-10	2.02898e-10	3.63537e-09	1.31859e-11	1.61686e-10	1.87336e-10	4.05796e-13	3.61719e-09	5.6105e-11	0.0515315	0.000111624	0.00362711	0.0154331		18.1142	31.8182	5.76364
250	2022-03-07 12:43:31	9185796	2.50893e-10	2.11621e-10	3.01346e-09	1.18174e-11	1.49924e-10	1.62579e-10	4.23242e-13	2.99839e-09	5.20236e-11	0.0539508	0.000140451	0.00392154	0.0172638		18.9617	31.065	5.89045
251	2022-03-07 12:44:10	9224041	2.15268e-10	1.9914e-10	2.65638e-09	1.03619e-11	1.39947e-10	1.39494e-10	3.9828e-13	2.6431e-09	4.85616e-11	0.0525127	0.000149933	0.00390076	0.0182811		19.9855	29.7398	5.94365
252	2022-03-07 12:44:48	9262286	1.82835e-10	2.19238e-10	2.47738e-09	9.58578e-12	1.34941e-10	1.18477e-10	4.38476e-13	2.46499e-09	4.68245e-11	0.0478235	0.000176992	0.00386932	0.0189008		21.8975	28.8578	6.31914
253	2022-03-07 12:45:26	9300531	1.75762e-10	2.09942e-10	2.33448e-09	8.98163e-12	1.30363e-10	1.13894e-10	4.19884e-13	2.32281e-09	4.5236e-11	0.0487876	0.000179862	0.00384738	0.0193773		21.8317	28.2356	6.16433
254	2022-03-07 12:46:04	9338776	1.65205e-10	2.10074e-10	2.24721e-09	8.3248e-12	1.28026e-10	1.07053e-10	4.20148e-13	2.23597e-09	4.4425e-11	0.0476381	0.000186964	0.0037045	0.019769		22.313	27.0748	6.04121
255	2022-03-07 12:46:43	9377021	1.38717e-10	2.26138e-10	2.15885e-09	8.04423e-12	1.21902e-10	8.98886e-11	4.52276e-13	2.14806e-09	4.23e-11	0.0416373	0.000209499	0.00372616	0.0195938		24.659	27.3424	6.74235
256	2022-03-07 12:47:21	9415266	1.25355e-10	2.1721e-10	2.08155e-09	7.56692e-12	1.19124e-10	8.123e-11	4.3442e-13	2.07114e-09	4.1336e-11	0.0390238	0.0002087	0.00363523	0.0198583		25.9405	26.5953	6.89895
257	2022-03-07 12:47:59	9453511	1.16411e-10	2.0902e-10	2.05203e-09	7.18422e-12	1.15587e-10	7.54343e-11	4.1804e-13	2.04177e-09	4.01087e-11	0.0367608	0.00020372	0.00350103	0.0195459		26.6787	26.1743	6.98298
258	2022-03-07 12:48:37	9491756	1.16981e-10	2.1201e-10	2.03593e-09	6.66715e-12	1.15461e-10	7.58037e-11	4.2402e-13	2.02575e-09	4.0065e-11	0.037233	0.000208268	0.00327474	0.019679		26.2002	24.7742	6.4909
259	2022-03-07 12:49:16	9530001	1.16981e-10	2.2921e-10	1.97448e-09	6.5661e-12	1.11959e-10	7.58037e-11	4.5842e-13	1.96461e-09	3.88498e-11	0.0383917	0.000232173	0.00332548	0.019676		25.7001	25.0421	6.43585
260	2022-03-07 12:49:54	9568246	1.15164e-10	2.18777e-10	1.98618e-09	6.40807e-12	1.10187e-10	7.46263e-11	4.37554e-13	1.97625e-09	3.82349e-11	0.0375728	0.000220299	0.00322633	0.0192505		25.6492	24.8912	6.38441
261	2022-03-07 12:50:32	9606491	1.13863e-10	2.0644e-10	1.92834e-09	6.39517e-12	1.08489e-10	7.37832e-11	4.1288e-13	1.9187e-09	3.76457e-11	0.0382626	0.000214112	0.00331641	0.0195223		25.6275	25.1536	6.44625
262	2022-03-07 12:51:10	9644736	1.02683e-10	2.08007e-10	1.90675e-09	6.063e-12	1.08536e-10	6.65386e-11	4.16014e-13	1.89722e-09	3.7662e-11	0.0348963	0.00021818	0.00317976	0.0197519		27.3918	24.1535	6.61606
263	2022-03-07 12:51:48	9682981	9.55136e-11	2.11385e-10	1.91166e-09	5.9942e-12	1.08259e-10	6.18928e-11	4.2277e-13	1.9021e-09	3.75659e-11	0.0323765	0.000221153	0.0031356	0.0196509		28.7617	23.9878	6.8993
264	2022-03-07 12:52:27	9721226	9.98028e-11	2.0643e-10	1.8723e-09	5.79962e-12	1.06751e-10	6.46722e-11	4.1286e-13	1.86294e-09	3.70426e-11	0.0345416	0.00022051	0.00309759	0.0197845		27.4972	23.6455	6.50185
265	2022-03-07 12:53:05	9759471	9.06331e-11	2.13996e-10	1.88437e-09	5.7577e-12	1.07111e-10	5.87302e-11	4.27992e-13	1.87495e-09	3.71675e-11	0.031167	0.000227127	0.0030555	0.0197241		29.4834	23.4477	6.91319
266	2022-03-07 12:53:43	9797716	1.06231e-10	2.13423e-10	1.85313e-09	5.47175e-12	1.04136e-10	6.88377e-11	4.26846e-13	1.84386e-09	3.61352e-11	0.0371467	0.000230338	0.00295271	0.0194995		25.6536	23.0363	5.90963
267	2022-03-07 12:54:21	9835961	9.02246e-11	1.98608e-10	1.84791e-09	5.32125e-12	1.03824e-10	5.84655e-11	3.97216e-13	1.83867e-09	3.60269e-11	0.0316387	0.000214954	0.0028796	0.019496		28.6996	22.6116	6.48942
268	2022-03-07 12:55:00	9874206	8.95043e-11	2.15389e-10	1.83242e-09	5.4223e-12	1.02274e-10	5.79988e-11	4.30778e-13	1.82326e-09	3.54891e-11	0.0316515	0.000235087	0.00295909	0.0193673		28.7318	23.1898	6.66286
269	2022-03-07 12:55:38	9912451	7.64753e-11	2.06379e-10	1.81382e-09	5.47605e-12	1.03003e-10	4.9556e-11	4.12758e-13	1.80475e-09	3.5742e-11	0.0273213	0.000227563	0.00301907	0.0197054		32.2167	23.2495	7.49021
270	2022-03-07 12:56:16	9950696	2.82445e-10	1.19816e-10	6.45088e-07	3.70015e-12	9.63564e-11	1.83024e-10	2.39632e-13	6.41863e-07	3.34357e-11	0.00028372	3.71472e-07	5.73588e-06	5.18312e-05		10.0892	18.0163	1.8177
271	2022-03-07 12:56:56	9990485	5.59966e-11	8.82625e-11	6.60765e-07	3.6249e-12	9.34286e-11	3.62858e-11	1.76525e-13	6.57461e-07	3.24197e-11	5.49148e-05	2.67152e-07	5.48591e-06	4.90639e-05		35.4447	18.1945	6.44899
272	2022-03-07 12:57:32	10026131	6.06191e-11	8.66653e-11	6.67573e-07	3.20995e-12	8.70271e-11	3.92812e-11	1.73331e-13	6.64235e-07	3.01984e-11	5.88418e-05	2.59643e-07	4.80839e-06	4.52361e-05		31.8945	17.4493	5.56539
273	2022-03-07 12:58:07	10061776	3.20134e-11	2.05468e-10	6.24932e-07	4.15671e-10	2.8512e-10	2.07447e-11	4.10936e-13	6.21807e-07	9.89366e-11	3.31951e-05	6.57569e-07	0.000665146	0.000158316		95.7323	89.3254	85.5133
274	2022-03-07 12:58:50	10104303	2.37394e-08	1.78961e-10	6.46432e-07	4.22975e-10	2.44016e-10	1.53831e-08	3.57922e-13	6.432e-07	8.46736e-11	0.023797	5.53689e-07	0.000654322	0.000130986		2.93711	90.8665	2.66884
275	2022-03-07 12:59:17	10131219	2.50541e-08	1.63748e-10	6.43386e-07	3.99886e-10	2.31427e-10	1.62351e-08	3.27496e-13	6.40169e-07	8.03052e-11	0.0252338	5.09019e-07	0.000621534	0.000124816		2.63985	90.8414	2.39808
276	2022-03-07 12:59:44	10158136	2.5894e-08	1.66614e-10	6.40968e-07	3.19664e-10	2.15552e-10	1.67793e-08	3.33228e-13	6.37763e-07	7.47965e-11	0.0261781	5.19882e-07	0.000498721	0.000116693		2.0846	89.4844	1.86539
277	2022-03-07 13:00:11	10185051	2.6283e-08	1.48093e-10	6.59422e-07	6.96181e-11	1.58308e-10	1.70314e-08	2.96186e-13	6.56125e-07	5.49329e-11	0.0258277	4.4916e-07	0.000105574	8.33046e-05		0.567662	71.5995	0.406443
278	2022-03-07 13:00:40	10214557	1.55786e-09	1.04602e-10	6.88267e-07	2.38241e-11	1.24321e-10	1.00949e-09	2.09204e-13	6.84826e-07	4.31394e-11	0.00146672	3.03958e-07	3.46146e-05	6.26783e-05		4.31268	52.3625	2.25823
279	2022-03-07 13:01:17	10251112	7.32869e-10	9.40981e-11	6.91313e-07	1.56681e-11	1.10317e-10	4.74899e-10	1.88196e-13	6.87856e-07	3.828e-11	0.000686952	2.7223e-07	2.26643e-05	5.53729e-05		6.84624	44.8914	3.07337
280	2022-03-07 13:01:52	10286760	5.09817e-10	8.25803e-11	6.8773e-07	1.27656e-11	1.02192e-10	3.30361e-10	1.65161e-13	6.84291e-07	3.54606e-11	0.000480365	2.40153e-07	1.85619e-05	5.15618e-05		8.47191	41.747	3.53677
281	2022-03-07 13:02:28	10322406	4.9523e-10	1.87264e-10	1.4064e-08	1.7e-11	2.10129e-10	3.20909e-10	3.74528e-13	1.39937e-08	7.29148e-11	0.0228178	2.66303e-05	0.00120876	0.0051845		14.3223	31.69	4.53874
282	2022-03-07 13:03:05	10359071	3.6652e-10	2.16443e-10	5.90638e-09	1.47909e-11	1.86282e-10	2.37505e-10	4.32886e-13	5.87685e-09	6.46399e-11	0.0402116	7.32913e-05	0.00250422	0.0109441		16.6158	31.2524	5.19285
283	2022-03-07 13:03:44	10398336	3.03321e-10	1.82595e-10	3.90901e-09	1.32429e-11	1.63712e-10	1.96552e-10	3.6519e-13	3.88946e-09	5.68081e-11	0.0502818	9.34226e-05	0.00338779	0.0145326		17.5473	31.6592	5.55534
284	2022-03-07 13:04:22	10436581	2.51936e-10	2.04608e-10	3.12745e-09	1.12832e-11	1.56331e-10	1.63255e-10	4.09216e-13	3.11181e-09	5.42469e-11	0.0522005	0.000130847	0.0036078	0.0173454		19.1272	29.2226	5.58946
285	2022-03-07 13:05:00	10474826	2.17536e-10	2.03963e-10	2.73415e-09	1.0048e-11	1.47995e-10	1.40963e-10	4.07926e-13	2.72048e-09	5.13543e-11	0.0515565	0.000149197	0.003675	0.0187825		20.3113	27.9662	5.68029
286	2022-03-07 13:05:39	10513071	2.02379e-10	2.10576e-10	2.53603e-09	9.66855e-12	1.37259e-10	1.31142e-10	4.21152e-13	2.52335e-09	4.76289e-11	0.0517114	0.000166067	0.00381247	0.0187809		20.4408	28.6955	5.86559
287	2022-03-07 13:06:17	10551316	1.85136e-10	2.11785e-10	2.38366e-09	8.81715e-12	1.29782e-10	1.19968e-10	4.2357e-13	2.37174e-09	4.50344e-11	0.0503294	0.000177697	0.003699	0.0188929		20.8206	27.95	5.81935
288	2022-03-07 13:06:55	10589561	1.55348e-10	2.00185e-10	2.26512e-09	8.18397e-12	1.26361e-10	1.00666e-10	4.0037e-13	2.25379e-09	4.38473e-11	0.0444416	0.000176754	0.00361304	0.0193576		23.1404	27.0029	6.24858
289	2022-03-07 13:07:33	10627806	1.36976e-10	2.17282e-10	2.20588e-09	7.8346e-12	1.23539e-10	8.87604e-11	4.34564e-13	2.19485e-09	4.2868e-11	0.0402381	0.000197003	0.00355169	0.0194335		24.936	26.5707	6.62566
290	2022-03-07 13:08:12	10666051	1.43415e-10	2.04567e-10	2.11673e-09	7.2885e-12	1.22881e-10	9.29329e-11	4.09134e-13	2.10615e-09	4.26397e-11	0.043904	0.000193286	0.00344328	0.0201441		23.6665	25.2959	5.98665
291	2022-03-07 13:08:50	10704296	1.18368e-10	2.15675e-10	2.07416e-09	7.0864e-12	1.18346e-10	7.67025e-11	4.3135e-13	2.06379e-09	4.10661e-11	0.03698	0.000207964	0.00341652	0.0197989		26.6269	25.4585	6.77881
292	2022-03-07 13:09:28	10742541	1.23302e-10	2.07955e-10	2.02093e-09	6.92192e-12	1.13734e-10	7.98997e-11	4.1591e-13	2.01083e-09	3.94657e-11	0.0395361	0.000205801	0.00342512	0.0195285		25.1612	25.7678	6.48348
293	2022-03-07 13:10:06	10780786	1.24882e-10	2.11969e-10	1.99959e-09	6.4242e-12	1.14679e-10	8.09235e-11	4.23938e-13	1.98959e-09	3.97936e-11	0.0404701	0.000212012	0.00321276	0.0199009		24.6918	24.2121	5.97842
294	2022-03-07 13:10:45	10819031	1.09714e-10	2.22985e-10	1.96398e-09	6.15437e-12	1.0941e-10	7.10947e-11	4.4597e-13	1.95416e-09	3.79653e-11	0.0361993	0.000227075	0.00313362	0.0193308		26.2921	24.268	6.38058
295	2022-03-07 13:11:23	10857276	9.60726e-11	2.13464e-10	1.94533e-09	6.25112e-12	1.08796e-10	6.2255e-11	4.26928e-13	1.9356e-09	3.77522e-11	0.0320023	0.000219463	0.0032134	0.0194066		28.9291	24.6683	7.13633
296	2022-03-07 13:12:01	10895521	1.06252e-10	2.1376e-10	1.90886e-09	5.8781e-12	1.05993e-10	6.88513e-11	4.2752e-13	1.89932e-09	3.67796e-11	0.0360693	0.000223966	0.00307938	0.0192678		26.2304	24.0102	6.29799
297	2022-03-07 13:12:39	10933766	1.11197e-10	2.01853e-10	1.92462e-09	5.74802e-12	1.06482e-10	7.20557e-11	4.03706e-13	1.915e-09	3.69493e-11	0.0374389	0.000209759	0.00298657	0.0191982		25.3156	23.5338	5.95772
298	2022-03-07 13:13:18	10972011	1.04995e-10	1.91492e-10	1.89692e-09	5.71577e-12	1.03214e-10	6.80368e-11	3.82984e-13	1.88744e-09	3.58153e-11	0.035867	0.000201898	0.00301318	0.0188807		25.9276	24.0008	6.22283
299	2022-03-07 13:13:56	11010256	1.06876e-10	2.16965e-10	1.84024e-09	5.39972e-12	1.04059e-10	6.92556e-11	4.3393e-13	1.83104e-09	3.61085e-11	0.037634	0.000235801	0.00293425	0.0196216		25.4727	22.8116	5.81074
300	2022-03-07 13:14:34	11048501	9.49868e-11	2.16668e-10	1.85638e-09	5.42875e-12	1.01016e-10	6.15514e-11	4.33336e-13	1.8471e-09	3.50526e-11	0.0331567	0.000233431	0.00292437	0.0188822		27.3499	23.4284	6.40764
301	2022-03-07 13:15:12	11086746	9.30626e-11	2.03276e-10	1.85097e-09	5.23202e-12	9.8775e-11	6.03046e-11	4.06552e-13	1.84172e-09	3.42749e-11	0.03258	0.000219643	0.00282664	0.0185173		27.2364	23.1785	6.31297
302	2022-03-07 13:15:50	11124991	8.70211e-11	2.05642e-10	1.84503e-09	5.24385e-12	9.95621e-11	5.63897e-11	4.11284e-13	1.8358e-09	3.4548e-11	0.030563	0.000222915	0.00284215	0.0187249		28.7228	23.0768	6.62829
303	2022-03-07 13:16:29	11163236	6.94018e-11	2.02713e-10	1.83615e-09	5.35995e-12	9.88471e-11	4.49724e-11	4.05426e-13	1.82697e-09	3.42999e-11	0.0244928	0.000220802	0.00291912	0.0186804		33.5564	23.599	7.91896
304	2022-03-07 13:17:07	11201481	8.24523e-11	2.05733e-10	5.78259e-07	3.5475e-12	9.64236e-11	5.34291e-11	4.11466e-13	5.75368e-07	3.3459e-11	9.23965e-05	7.1156e-07	6.13479e-06	5.78616e-05		27.7124	17.3195	4.79964
305	2022-03-07 13:17:47	11241270	7.28848e-11	9.26443e-11	6.59869e-07	3.47225e-12	9.05979e-11	4.72294e-11	1.85289e-13	6.5657e-07	3.14375e-11	7.15738e-05	2.80796e-07	5.26203e-06	4.7642e-05		28.9923	18.0062	5.22041
306	2022-03-07 13:18:22	11276916	4.31719e-11	9.49581e-11	6.60765e-07	3.34862e-12	8.47957e-11	2.79754e-11	1.89916e-13	6.57461e-07	2.94241e-11	4.23379e-05	2.87419e-07	5.06779e-06	4.45304e-05		39.3567	18.444	7.25893
307	2022-03-07 13:18:58	11312561	4.69236e-11	9.30436e-11	6.62915e-07	4.60049e-10	3.10329e-10	3.04065e-11	1.86087e-13	6.596e-07	1.07684e-10	4.58679e-05	2.8071e-07	0.000693979	0.00016244		94.4146	89.5065	84.5072
308	2022-03-07 13:19:41	11355088	2.44225e-08	1.76207e-10	6.35503e-07	3.05511e-10	2.20893e-10	1.58258e-08	3.52414e-13	6.32325e-07	7.66499e-11	0.0249028	5.54543e-07	0.000480739	0.000120613		2.1275	88.8082	1.88939
309	2022-03-07 13:20:08	11382004	2.54371e-08	1.66378e-10	6.38101e-07	3.17301e-10	2.10436e-10	1.64832e-08	3.32756e-13	6.3491e-07	7.30213e-11	0.0258317	5.21479e-07	0.000497258	0.000114435		2.10235	89.6386	1.88452
310	2022-03-07 13:20:34	11408921	2.61446e-08	1.58444e-10	6.44998e-07	3.55582e-10	2.03271e-10	1.69417e-08	3.16888e-13	6.41773e-07	7.0535e-11	0.0262663	4.91301e-07	0.000551292	0.000109357		2.2559	90.9398	2.05151
311	2022-03-07 13:21:01	11435836	2.52712e-08	1.56182e-10	6.42311e-07	2.62247e-10	1.88211e-10	1.63757e-08	3.12364e-13	6.39099e-07	6.53092e-11	0.025495	4.86313e-07	0.000408287	0.000101678		1.76991	88.8799	1.57309
312	2022-03-07 13:21:31	11465341	2.62368e-09	9.4692e-11	6.90238e-07	2.71437e-11	1.2326e-10	1.70014e-09	1.89384e-13	6.86787e-07	4.27712e-11	0.00246313	2.74375e-07	3.93251e-05	6.19659e-05		2.78047	55.8237	1.55216
313	2022-03-07 13:22:00	11494356	9.413e-10	8.45563e-11	6.90148e-07	1.79793e-11	1.10889e-10	6.09962e-10	1.69113e-13	6.86697e-07	3.84785e-11	0.000883814	2.45038e-07	2.60514e-05	5.5754e-05		5.76318	48.1979	2.77773
314	2022-03-07 13:22:36	11530912	6.06073e-10	9.28081e-11	6.92477e-07	1.39223e-11	1.01496e-10	3.92735e-10	1.85616e-13	6.89015e-07	3.52191e-11	0.000567146	2.68047e-07	2.01051e-05	5.08596e-05		7.45232	44.0236	3.28078
315	2022-03-07 13:23:12	11566560	4.21377e-10	1.56049e-10	8.9045e-08	1.74913e-11	2.22645e-10	2.73052e-10	3.12098e-13	8.85998e-08	7.72578e-11	0.00306645	3.50495e-06	0.000196432	0.000867627		17.0882	31.0811	5.3112
316	2022-03-07 13:23:48	11602206	3.97803e-10	1.97943e-10	8.10952e-09	1.51553e-11	1.94412e-10	2.57776e-10	3.95886e-13	8.06897e-09	6.7461e-11	0.0317869	4.88174e-05	0.00186883	0.00831874		15.9955	30.8764	4.93883
317	2022-03-07 13:24:24	11638871	3.25971e-10	1.98444e-10	4.63366e-09	1.34826e-11	1.7535e-10	2.11229e-10	3.96888e-13	4.61049e-09	6.08464e-11	0.0455858	8.56532e-05	0.00290971	0.0131314		17.2732	30.5698	5.28039
318	2022-03-07 13:25:04	11678136	2.74479e-10	2.15562e-10	3.45841e-09	1.19851e-11	1.61326e-10	1.77862e-10	4.31124e-13	3.44112e-09	5.59801e-11	0.0514289	0.00012466	0.00346549	0.0161867		18.4316	29.8206	5.49641
319	2022-03-07 13:25:42	11716381	2.58107e-10	2.10464e-10	2.85514e-09	1.05683e-11	1.48643e-10	1.67253e-10	4.20928e-13	2.84086e-09	5.15791e-11	0.0585797	0.000147428	0.0037015	0.0180654		17.9413	28.9001	5.18507
320	2022-03-07 13:26:20	11754626	2.15547e-10	2.12102e-10	2.59173e-09	9.53633e-12	1.41146e-10	1.39674e-10	4.24204e-13	2.57877e-09	4.89777e-11	0.0538924	0.000163676	0.00367952	0.0188977		19.6866	27.8537	5.48343
321	2022-03-07 13:26:58	11792871	1.92983e-10	2.0212e-10	2.42327e-09	8.89778e-12	1.35859e-10	1.25053e-10	4.0424e-13	2.41115e-09	4.71431e-11	0.0516051	0.000166816	0.00367181	0.0194543		20.7143	27.2341	5.64135
322	2022-03-07 13:27:36	11830076	1.47715e-10	2.12757e-10	2.28868e-09	8.2001e-12	1.28487e-10	9.57193e-11	4.25514e-13	2.27724e-09	4.4585e-11	0.0418229	0.000185921	0.00358289	0.0194807		24.2875	26.7058	6.48615
323	2022-03-07 13:28:14	11868321	1.61529e-10	2.12276e-10	2.23763e-09	7.46157e-12	1.21849e-10	1.04671e-10	4.24552e-13	2.22644e-09	4.22816e-11	0.0467775	0.000189733	0.00333459	0.0188957		21.5864	25.8951	5.5898
324	2022-03-07 13:28:52	11906566	1.28215e-10	1.85196e-10	2.13064e-09	7.21755e-12	1.19574e-10	8.30833e-11	3.70392e-13	2.11999e-09	4.14922e-11	0.0389945	0.000173841	0.0033875	0.019474		25.3064	25.6407	6.48873
325	2022-03-07 13:29:30	11944811	1.17916e-10	2.0855e-10	2.06845e-09	7.08425e-12	1.16206e-10	7.64096e-11	4.171e-13	2.05811e-09	4.03235e-11	0.0369405	0.000201649	0.00342491	0.0194945		26.4331	25.8036	6.82069
326	2022-03-07 13:30:09	11983056	1.16605e-10	2.11211e-10	2.03565e-09	6.56072e-12	1.11848e-10	7.556e-11	4.22422e-13	2.02547e-09	3.88113e-11	0.0371184	0.000207512	0.00322291	0.0190658		25.7305	25.0624	6.44867
327	2022-03-07 13:30:47	12021301	1.06521e-10	2.18111e-10	2.01649e-09	6.62415e-12	1.05893e-10	6.90256e-11	4.36222e-13	2.00641e-09	3.67449e-11	0.0342306	0.000216327	0.00328499	0.0182222		26.7557	26.271	7.029
328	2022-03-07 13:31:25	12059546	9.6868e-11	2.0384e-10	1.97274e-09	5.9899e-12	1.06449e-10	6.27705e-11	4.0768e-13	1.96288e-09	3.69378e-11	0.0318189	0.000206657	0.00303634	0.0187241		28.2074	24.2873	6.85084
329	2022-03-07 13:32:03	12097791	9.19553e-11	2.04587e-10	1.95121e-09	6.08772e-12	1.06074e-10	5.9587e-11	4.09174e-13	1.94145e-09	3.68077e-11	0.0305385	0.000209703	0.00311997	0.018864		29.3014	24.6505	7.22294
330	2022-03-07 13:32:42	12136036	1.11004e-10	1.99171e-10	1.91916e-09	5.83725e-12	1.01539e-10	7.19306e-11	3.98342e-13	1.90956e-09	3.5234e-11	0.0374802	0.000207561	0.00304157	0.0183591		24.7462	24.6782	6.10693
331	2022-03-07 13:33:20	12174281	9.05686e-11	2.02161e-10	1.9081e-09	5.71577e-12	9.92793e-11	5.86885e-11	4.04322e-13	1.89856e-09	3.44499e-11	0.0307575	0.000211898	0.00299553	0.0180546		28.2812	24.6977	6.98482
332	2022-03-07 13:33:58	12212526	9.03321e-11	1.96601e-10	1.90288e-09	5.57495e-12	1.02528e-10	5.85352e-11	3.93202e-13	1.89337e-09	3.55772e-11	0.0307614	0.000206635	0.00292974	0.0186965		28.6985	23.6626	6.79082
333	2022-03-07 13:34:36	12250771	8.23233e-11	1.94738e-10	1.85296e-09	5.42337e-12	9.75707e-11	5.33455e-11	3.89476e-13	1.8437e-09	3.3857e-11	0.0287893	0.000210191	0.00292687	0.0182719		29.7088	24.054	7.14616
334	2022-03-07 13:35:15	12289016	8.74511e-11	2.05724e-10	1.87068e-09	5.27932e-12	9.95521e-11	5.66683e-11	4.11448e-13	1.86133e-09	3.45446e-11	0.0302929	0.000219946	0.00282214	0.0184663		28.6524	23.1983	6.64687
335	2022-03-07 13:35:53	12327261	8.30973e-11	1.98362e-10	1.85323e-09	5.29007e-12	1.00359e-10	5.38471e-11	3.96724e-13	1.84396e-09	3.48246e-11	0.0290558	0.000214072	0.00285451	0.0187913		29.8389	23.1	6.8928
336	2022-03-07 13:36:31	12365506	8.22158e-11	1.99816e-10	1.82819e-09	5.10625e-12	9.97207e-11	5.32758e-11	3.99632e-13	1.81905e-09	3.46031e-11	0.0291413	0.000218594	0.00279306	0.0189275		29.7925	22.5864	6.72907
337	2022-03-07 13:37:09	12403751	7.34438e-11	1.94871e-10	1.82434e-09	5.2761e-12	9.81129e-11	4.75916e-11	3.89742e-13	1.81522e-09	3.40452e-11	0.026087	0.000213635	0.00289206	0.0186616		32.0946	23.456	7.52813
338	2022-03-07 13:37:47	12441996	8.50646e-11	2.03317e-10	1.82866e-09	5.57065e-12	1.02591e-10	5.51219e-11	4.06634e-13	1.81952e-09	3.55991e-11	0.0301433	0.000222367	0.0030463	0.0194673		29.9554	23.631	7.07875
339	2022-03-07 13:38:26	12480241	4.06671e-11	9.722e-11	6.58794e-07	3.59265e-12	9.13036e-11	2.63523e-11	1.9444e-13	6.555e-07	3.16823e-11	4.00008e-05	2.95145e-07	5.45337e-06	4.80914e-05		42.5668	18.3946	7.82997
340	2022-03-07 13:39:06	12520030	5.19009e-11	8.39625e-11	6.62288e-07	3.28627e-12	8.63793e-11	3.36318e-11	1.67925e-13	6.58977e-07	2.99736e-11	5.07812e-05	2.53553e-07	4.962e-06	4.52577e-05		35.3096	17.902	6.32111
341	2022-03-07 13:39:41	12555676	3.84634e-11	7.36015e-11	6.6193e-07	2.89175e-12	8.05536e-11	2.49243e-11	1.47203e-13	6.5862e-07	2.79521e-11	3.7654e-05	2.22385e-07	4.36866e-06	4.22282e-05		40.4661	17.0691	6.90721
342	2022-03-07 13:40:24	12598203	2.57193e-08	1.71866e-10	6.44282e-07	4.09158e-10	2.12773e-10	1.66661e-08	3.43732e-13	6.41061e-07	7.38322e-11	0.0258677	5.33512e-07	0.00063506	0.000114596		2.60774	91.6889	2.39101
343	2022-03-07 13:40:51	12625119	2.349e-08	1.47684e-10	6.44282e-07	4.2238e-10	1.99302e-10	1.52215e-08	2.95368e-13	6.41061e-07	6.91578e-11	0.0236256	4.58445e-07	0.000655582	0.000107341		2.91548	92.403	2.69399
344	2022-03-07 13:41:18	12652036	2.47497e-08	1.47367e-10	6.41594e-07	4.1995e-10	1.86129e-10	1.60378e-08	2.94734e-13	6.38386e-07	6.45868e-11	0.0249968	4.59378e-07	0.000654542	0.000100666		2.74339	92.829	2.54666
345	2022-03-07 13:41:44	12678951	2.5337e-08	1.41838e-10	6.39982e-07	4.22619e-10	1.79151e-10	1.64184e-08	2.83676e-13	6.36782e-07	6.21654e-11	0.0256544	4.43256e-07	0.000660361	9.71362e-05		2.68989	93.12	2.50482
346	2022-03-07 13:42:11	12705866	2.54418e-08	1.37528e-10	6.65423e-07	6.18523e-11	1.34059e-10	1.64863e-08	2.75056e-13	6.62096e-07	4.65185e-11	0.0247756	4.13355e-07	9.29519e-05	6.99081e-05		0.514431	72.5548	0.373244
347	2022-03-07 13:42:41	12735372	1.47904e-09	9.43541e-11	6.88984e-07	2.19289e-11	1.12827e-10	9.58418e-10	1.88708e-13	6.85539e-07	3.9151e-11	0.00139106	2.73893e-07	3.18279e-05	5.68242e-05		4.1598	52.7153	2.19285
348	2022-03-07 13:43:17	12771927	7.34352e-10	7.99184e-11	6.93284e-07	1.57218e-11	1.02054e-10	4.7586e-10	1.59837e-13	6.89818e-07	3.54127e-11	0.000686386	2.3055e-07	2.26773e-05	5.10797e-05		6.57836	46.9194	3.08653
349	2022-03-07 13:43:53	12807575	5.1071e-10	8.70134e-11	7.03228e-07	1.23969e-11	9.72929e-11	3.3094e-10	1.74027e-13	6.99712e-07	3.37606e-11	0.000470601	2.47469e-07	1.76286e-05	4.80081e-05		8.14984	42.2177	3.44067
350	2022-03-07 13:44:29	12843221	4.93897e-10	1.8667e-10	1.37801e-08	1.62206e-11	1.96418e-10	3.20045e-10	3.7334e-13	1.37112e-08	6.8157e-11	0.0232252	2.70927e-05	0.0011771	0.00494605		13.6253	32.129	4.37766
351	2022-03-07 13:45:05	12879886	3.5978e-10	2.04218e-10	5.85016e-09	1.44157e-11	1.75676e-10	2.33137e-10	4.08436e-13	5.82091e-09	6.09596e-11	0.0398515	6.98162e-05	0.00246415	0.0104202		16.2091	31.9641	5.18108
352	2022-03-07 13:45:45	12919151	2.9657e-10	2.08263e-10	3.89988e-09	1.21528e-11	1.60449e-10	1.92177e-10	4.16526e-13	3.88038e-09	5.56758e-11	0.0492778	0.000106805	0.0031162	0.0142763		17.2991	30.2316	5.22979
353	2022-03-07 13:46:23	12957396	2.58472e-10	2.05918e-10	3.10229e-09	1.06177e-11	1.47534e-10	1.6749e-10	4.11836e-13	3.08678e-09	5.11943e-11	0.0539891	0.000132752	0.00342254	0.0165021		17.8611	29.1529	5.20704
354	2022-03-07 13:47:01	12995641	1.95617e-10	2.0473e-10	2.71224e-09	9.847e-12	1.38421e-10	1.2676e-10	4.0946e-13	2.69868e-09	4.80321e-11	0.0467362	0.000150967	0.00363058	0.0177094		21.1828	28.9041	6.12271
355	2022-03-07 13:47:39	13033886	1.99627e-10	2.1591e-10	2.49148e-09	9.159e-12	1.32998e-10	1.29358e-10	4.3182e-13	2.47902e-09	4.61503e-11	0.0519203	0.000173319	0.00367613	0.0185232		20.0546	28.2249	5.6604
356	2022-03-07 13:48:18	13072131	1.58014e-10	2.1119e-10	2.34801e-09	7.99585e-12	1.26696e-10	1.02393e-10	4.2238e-13	2.33627e-09	4.39635e-11	0.0436084	0.000179889	0.00340537	0.0187237		22.7699	26.4862	6.03088
357	2022-03-07 13:48:56	13110376	1.60174e-10	1.59252e-10	3.47851e-07	2.76275e-12	7.30371e-11	1.03793e-10	3.18504e-13	3.46112e-07	2.53439e-11	0.000298383	9.15633e-07	7.94234e-06	7.28584e-05		13.0617	17.7168	2.31412

## Sheet: Raw Data
Index	Time	ms	Ethylene mbar	Carbon monoxide mbar	Argon mbar	Ethylene oxide mbar	Carbon dioxide mbar	Corrected Ethylene	Corrected CO	Corrected Ar	Corrected CO2		Time, min	Initial Time	6.42635e+07	Ethylene (ć )	Carbon monoxide (ć )	Ethylene Oxide (ć )	Carbon dioxide (ć )	Ethylene integral	CO intergral	EO integral	CO2 integral
1	2022-03-07 10:10:30	4656	2.37628e-08	1.17731e-09	5.72973e-07	4.45581e-10	8.11529e-10	1.53983e-08	2.35462e-12	5.70108e-07	2.81601e-10		0	0		0.0268744	4.10948e-06	0.000777665	0.000491473	0	0	0	0
2	2022-03-07 10:11:01	35607	2.18104e-09	4.02212e-10	6.46432e-07	6.20318e-11	2.54401e-10	1.41331e-09	8.04424e-13	6.432e-07	8.82771e-11		0.516667	0.516667		0.00218633	1.24441e-06	9.59603e-05	0.000136561	0.00750735	1.38309e-06	0.000225687	0.000162242
3	2022-03-07 10:11:45	79265	7.46543e-10	2.83881e-10	6.51538e-07	4.07134e-11	2.01539e-10	4.8376e-10	5.67762e-13	6.4828e-07	6.9934e-11		1.25	1.25		0.000742489	8.71418e-07	6.24881e-05	0.000107337	0.00858125	2.15889e-06	0.000283784	0.000251671
4	2022-03-07 10:12:20	114911	5.33027e-10	2.41844e-10	6.49747e-07	3.34432e-11	1.80183e-10	3.45401e-10	4.83688e-13	6.46498e-07	6.25235e-11		1.83333	1.83333		0.000531594	7.44425e-07	5.14711e-05	9.62275e-05	0.00895286	2.63018e-06	0.000317022	0.000311044
5	2022-03-07 10:12:56	150556	5.85992e-10	3.6681e-10	1.73847e-08	4.89168e-11	2.92169e-10	3.79723e-10	7.3362e-13	1.72978e-08	1.01383e-10		2.43333	2.43333		0.0218424	4.21992e-05	0.00281378	0.00583172	0.015665	1.55133e-05	0.0011766	0.00208943
6	2022-03-07 10:13:33	187221	4.92112e-10	3.74724e-10	6.86519e-09	4.04382e-11	2.64153e-10	3.18889e-10	7.49448e-13	6.83086e-09	9.16611e-11		3.05	3.05		0.0464501	0.000109166	0.00589032	0.0133516	0.0367219	6.21843e-05	0.00386037	0.00800427
7	2022-03-07 10:14:12	226486	3.88579e-10	3.58138e-10	4.26346e-09	3.52213e-11	2.42139e-10	2.51799e-10	7.16276e-13	4.24214e-09	8.40222e-11		3.7	3.7		0.0590598	0.000168003	0.0082612	0.0197075	0.0710126	0.000152265	0.00845961	0.0187485
8	2022-03-07 10:14:50	264731	3.16167e-10	3.55169e-10	3.16398e-09	3.21414e-11	2.30606e-10	2.04876e-10	7.10338e-13	3.14816e-09	8.00203e-11		4.33333	4.33333		0.0647527	0.000224508	0.0101585	0.025291	0.11022	0.00027656	0.0142925	0.032998
9	2022-03-07 10:15:28	302976	2.73694e-10	3.4447e-10	2.67782e-09	2.86046e-11	2.13604e-10	1.77354e-10	6.8894e-13	2.66443e-09	7.41206e-11		4.96667	4.96667		0.0662306	0.000257276	0.010682	0.0276795	0.151698	0.000429125	0.020892	0.049772
10	2022-03-07 10:16:07	341221	2.33102e-10	3.44808e-10	2.36393e-09	2.69276e-11	2.05363e-10	1.5105e-10	6.89616e-13	2.35211e-09	7.1261e-11		5.61667	5.61667		0.0638979	0.000291724	0.011391	0.0301451	0.19399	0.00060755	0.0280658	0.068565
11	2022-03-07 10:16:45	379466	1.95026e-10	3.26021e-10	2.21725e-09	2.4897e-11	1.96821e-10	1.26377e-10	6.52042e-13	2.20616e-09	6.82969e-11		6.25	6.25		0.0569971	0.000294077	0.0112288	0.0308025	0.232273	0.000793054	0.0352287	0.0878651
12	2022-03-07 10:17:23	417711	1.83899e-10	3.24189e-10	2.10701e-09	2.37843e-11	1.82879e-10	1.19167e-10	6.48378e-13	2.09647e-09	6.3459e-11		6.88333	6.88333		0.0565572	0.000307724	0.0112882	0.030118	0.268232	0.000983624	0.0423591	0.107157
13	2022-03-07 10:18:01	455956	1.7488e-10	3.20288e-10	2.04811e-09	2.26416e-11	1.76444e-10	1.13322e-10	6.40576e-13	2.03787e-09	6.12261e-11		7.51667	7.51667		0.0553302	0.000312764	0.0110549	0.0298939	0.303663	0.00118011	0.0494344	0.12616
14	2022-03-07 10:18:40	494201	1.4492e-10	3.0017e-10	1.94334e-09	2.12151e-11	1.69375e-10	9.39082e-11	6.0034e-13	1.93362e-09	5.87731e-11		8.16667	8.16667		0.0483231	0.000308922	0.0109168	0.0302434	0.33735	0.00138216	0.0565752	0.145705
15	2022-03-07 10:19:18	532446	1.57487e-10	3.20676e-10	1.91275e-09	2.07217e-11	1.64278e-10	1.02052e-10	6.41352e-13	1.90319e-09	5.70045e-11		8.8	8.8		0.0533533	0.000335304	0.0108335	0.0298024	0.369548	0.00158616	0.0634628	0.164719
16	2022-03-07 10:19:56	570691	1.35697e-10	3.18066e-10	1.83142e-09	2.0053e-11	1.60971e-10	8.79317e-11	6.36132e-13	1.82226e-09	5.58569e-11		9.43333	9.43333		0.0480128	0.000347344	0.0109494	0.0304993	0.401647	0.00180234	0.0703607	0.183815
17	2022-03-07 10:20:34	608936	1.39943e-10	2.97037e-10	1.81353e-09	1.9451e-11	1.5539e-10	9.06831e-11	5.94074e-13	1.80446e-09	5.39203e-11		10.0667	10.0667		0.0500036	0.000327579	0.0107255	0.0297323	0.432686	0.00201606	0.0772244	0.202888
18	2022-03-07 10:21:13	647181	1.31149e-10	3.06385e-10	1.76343e-09	1.85749e-11	1.5468e-10	8.49846e-11	6.1277e-13	1.75461e-09	5.3674e-11		10.7167	10.7167		0.0481928	0.000347488	0.0105334	0.0304373	0.464599	0.00223546	0.0841336	0.222443
19	2022-03-07 10:21:51	685426	1.26e-10	2.99187e-10	1.78446e-09	1.83696e-11	1.48931e-10	8.1648e-11	5.98374e-13	1.77554e-09	5.16791e-11		11.35	11.35		0.045755	0.000335325	0.0102942	0.0289606	0.49435	0.00245168	0.090729	0.241253
20	2022-03-07 10:22:29	723671	1.34987e-10	3.03937e-10	1.76207e-09	1.80245e-11	1.45773e-10	8.74716e-11	6.07874e-13	1.75326e-09	5.05832e-11		11.9833	11.9833		0.0496414	0.000344977	0.0102292	0.0287067	0.524558	0.00266711	0.097228	0.259514
21	2022-03-07 10:23:07	761916	1.04618e-10	2.8944e-10	1.70082e-09	1.71129e-11	1.46061e-10	6.77925e-11	5.7888e-13	1.69232e-09	5.06832e-11		12.6167	12.6167		0.0398587	0.000340353	0.0100616	0.0297993	0.5529	0.00288413	0.103653	0.278041
22	2022-03-07 10:23:46	800161	1.16916e-10	2.74892e-10	1.7241e-09	1.73042e-11	1.44165e-10	7.57616e-11	5.49784e-13	1.71548e-09	5.00253e-11		13.2667	13.2667		0.0439427	0.000318882	0.0100367	0.0290153	0.580136	0.00309838	0.110185	0.297156
23	2022-03-07 10:24:24	838406	9.73411e-11	2.83226e-10	1.66377e-09	1.67463e-11	1.42082e-10	6.3077e-11	5.66452e-13	1.65545e-09	4.93025e-11		13.9	13.9		0.0379121	0.000340463	0.0100653	0.029633	0.606056	0.00330718	0.116551	0.315728
24	2022-03-07 10:25:02	876651	1.05887e-10	2.67735e-10	1.64832e-09	1.66001e-11	1.39736e-10	6.86148e-11	5.3547e-13	1.64008e-09	4.84884e-11		14.5333	14.5333		0.0416271	0.000324858	0.0100709	0.0294169	0.631244	0.00351786	0.122927	0.334427
25	2022-03-07 10:25:40	914896	1.11574e-10	2.7913e-10	1.63144e-09	1.58917e-11	1.40844e-10	7.23e-11	5.5826e-13	1.62328e-09	4.88729e-11		15.1667	15.1667		0.0443166	0.000342188	0.0097409	0.0299569	0.658459	0.00372909	0.129201	0.353228
26	2022-03-07 10:26:19	953141	1.02576e-10	2.56587e-10	1.65223e-09	1.54413e-11	1.36246e-10	6.64692e-11	5.13174e-13	1.64397e-09	4.72774e-11		15.8167	15.8167		0.04023	0.000310595	0.00934573	0.0286143	0.685937	0.00394125	0.135404	0.372264
27	2022-03-07 10:26:57	991386	9.6954e-11	2.74298e-10	1.62942e-09	1.46253e-11	1.35834e-10	6.28262e-11	5.48596e-13	1.62127e-09	4.71344e-11		16.45	16.45		0.0385574	0.000336682	0.00897577	0.0289271	0.710886	0.00414622	0.141206	0.390485
28	2022-03-07 10:27:35	1029631	1.01899e-10	2.70889e-10	6.3457e-09	1.40373e-11	1.44338e-10	6.60306e-11	5.41778e-13	6.31397e-09	5.00853e-11		17.0833	17.0833		0.0104056	8.53772e-05	0.0022121	0.00789279	0.726391	0.00427987	0.144749	0.402145
29	2022-03-07 10:28:13	1067876	7.51316e-11	1.22089e-10	7.02422e-07	1.1897e-11	1.12136e-10	4.86853e-11	2.44178e-13	6.9891e-07	3.89112e-11		17.7167	17.7167		6.93106e-05	3.47623e-07	1.69371e-05	5.53957e-05	0.729708	0.00430702	0.145455	0.404662
30	2022-03-07 10:28:53	1107665	8.34951e-11	1.21505e-10	7.10036e-07	1.0937e-11	1.05221e-10	5.41048e-11	2.4301e-13	7.06486e-07	3.65117e-11		18.3833	18.3833		7.62001e-05	3.4225e-07	1.54034e-05	5.14223e-05	0.729757	0.00430725	0.145466	0.404698
31	2022-03-07 10:29:29	1143311	4.10111e-11	1.03589e-10	7.10843e-07	4.60584e-11	1.91724e-09	2.65752e-11	2.07178e-13	7.07289e-07	6.65282e-10		18.9833	18.9833		3.73855e-05	2.91454e-07	6.47941e-05	0.000935906	0.729791	0.00430744	0.14549	0.404994
32	2022-03-07 10:30:15	1189407	2.74111e-08	4.75108e-10	6.85222e-07	4.18489e-10	6.81358e-10	1.77624e-08	9.50216e-13	6.81796e-07	2.36431e-10		19.75	19.75		0.0259221	1.38673e-06	0.000610735	0.000345043	0.739742	0.00430808	0.145749	0.405485
33	2022-03-07 10:30:45	1219480	2.85285e-08	4.49574e-10	6.8558e-07	4.65674e-10	8.64921e-10	1.84865e-08	8.99148e-13	6.82152e-07	3.00128e-10		20.25	20.25		0.0269647	1.31151e-06	0.000679241	0.000437772	0.752964	0.00430875	0.146071	0.405681
34	2022-03-07 10:31:15	1249555	1.65408e-08	3.93664e-10	6.86834e-07	4.87487e-10	8.07093e-10	1.07184e-08	7.87328e-13	6.834e-07	2.80061e-10		20.75	20.75		0.0156056	1.14631e-06	0.00070976	0.000407757	0.763606	0.00430937	0.146418	0.405892
35	2022-03-07 10:31:42	1276380	1.90026e-08	3.60093e-10	6.92657e-07	7.54585e-11	3.09711e-10	1.23137e-08	7.20186e-13	6.89194e-07	1.0747e-10		21.2	21.2		0.0177775	1.03974e-06	0.000108941	0.000155156	0.771117	0.00430986	0.146603	0.406019
36	2022-03-07 10:32:15	1309456	1.40332e-09	1.44254e-10	7.37628e-07	3.47601e-11	2.28097e-10	9.09351e-10	2.88508e-13	7.3394e-07	7.91497e-11		21.75	21.75		0.0012328	3.91129e-07	4.71242e-05	0.000107303	0.776345	0.00431025	0.146645	0.406091
37	2022-03-07 10:32:52	1346012	7.66269e-10	1.3248e-10	7.38882e-07	2.68072e-11	1.93284e-10	4.96542e-10	2.6496e-13	7.35188e-07	6.70695e-11		22.3667	22.3667		0.000672018	3.58596e-07	3.62808e-05	9.07717e-05	0.776932	0.00431049	0.146671	0.406152
38	2022-03-07 10:33:27	1381660	5.53774e-10	1.34006e-10	7.38882e-07	2.30082e-11	1.74649e-10	3.58846e-10	2.68012e-13	7.35188e-07	6.06032e-11		22.95	22.95		0.00048566	3.62726e-07	3.11392e-05	8.20201e-05	0.77727	0.0043107	0.146691	0.406202
39	2022-03-07 10:34:03	1417306	6.45418e-10	2.65842e-10	1.29475e-08	3.4444e-11	2.90605e-10	4.18231e-10	5.31684e-13	1.28828e-08	1.0084e-10		23.55	23.55		0.0323021	4.10646e-05	0.00266028	0.00778837	0.787106	0.00432312	0.147498	0.408563
40	2022-03-07 10:34:39	1453971	4.26634e-10	2.43021e-10	5.93505e-09	2.86315e-11	2.59727e-10	2.76459e-10	4.86042e-13	5.90537e-09	9.01253e-11		24.15	24.15		0.0465807	8.18935e-05	0.00482414	0.0151853	0.810771	0.00436001	0.149744	0.415455
41	2022-03-07 10:35:19	1493236	3.3513e-10	2.62668e-10	3.84209e-09	2.52582e-11	2.42408e-10	2.17164e-10	5.25336e-13	3.82288e-09	8.41156e-11		24.8167	24.8167		0.0565224	0.000136732	0.00657408	0.0218932	0.845139	0.00443289	0.153543	0.427815
42	2022-03-07 10:35:57	1531481	2.83498e-10	2.63549e-10	3.00673e-09	2.1959e-11	2.2146e-10	1.83707e-10	5.27098e-13	2.9917e-09	7.68466e-11		25.45	25.45		0.0610985	0.000175306	0.00730328	0.0255582	0.882386	0.0045317	0.157938	0.442841
43	2022-03-07 10:36:35	1569726	2.46851e-10	2.4987e-10	2.57088e-09	2.03271e-11	2.08137e-10	1.59959e-10	4.9974e-13	2.55803e-09	7.22235e-11		26.0833	26.0833		0.0622197	0.000194385	0.00790667	0.0280929	0.921436	0.00464877	0.162754	0.459831
44	2022-03-07 10:37:13	1607971	2.00788e-10	2.43e-10	2.3223e-09	1.84018e-11	1.98366e-10	1.30111e-10	4.86e-13	2.31069e-09	6.8833e-11		26.7167	26.7167		0.0560266	0.000209275	0.00792395	0.02964	0.958881	0.00477659	0.167767	0.478113
45	2022-03-07 10:37:52	1646216	1.95853e-10	2.54078e-10	2.17222e-09	1.72311e-11	1.89756e-10	1.26913e-10	5.08156e-13	2.16136e-09	6.58453e-11		27.3667	27.3667		0.0584254	0.000233934	0.00793248	0.0303125	0.996078	0.00492064	0.17292	0.497597
46	2022-03-07 10:38:30	1684461	1.73601e-10	2.47843e-10	2.06391e-09	1.59143e-11	1.75902e-10	1.12493e-10	4.95686e-13	2.05359e-09	6.1038e-11		28	28		0.054505	0.000240168	0.00771075	0.029574	1.03184	0.00507077	0.177874	0.516561
47	2022-03-07 10:39:08	1722706	1.59594e-10	2.45683e-10	1.99349e-09	1.50059e-11	1.73031e-10	1.03417e-10	4.91366e-13	1.98352e-09	6.00418e-11		28.6333	28.6333		0.0518773	0.000246485	0.00752745	0.0301189	1.06553	0.00522488	0.1827	0.535464
48	2022-03-07 10:39:46	1760951	1.59357e-10	2.48242e-10	1.92818e-09	1.40212e-11	1.64e-10	1.03263e-10	4.96484e-13	1.91854e-09	5.6908e-11		29.2667	29.2667		0.0535548	0.000257488	0.00727173	0.0295138	1.09891	0.00538447	0.187386	0.554348
49	2022-03-07 10:40:25	1799196	1.356e-10	2.39212e-10	1.88642e-09	1.38621e-11	1.62349e-10	8.78688e-11	4.78424e-13	1.87699e-09	5.63351e-11		29.9167	29.9167		0.0465797	0.000253615	0.00734836	0.0298635	1.13146	0.00555058	0.192137	0.573645
50	2022-03-07 10:41:03	1837441	1.26774e-10	2.55706e-10	1.85171e-09	1.32364e-11	1.61072e-10	8.21496e-11	5.11412e-13	1.84245e-09	5.5892e-11		30.55	30.55		0.0443642	0.000276184	0.0071482	0.030184	1.16026	0.00571835	0.196728	0.592661
51	2022-03-07 10:41:41	1875686	1.49575e-10	2.61091e-10	1.80356e-09	1.26441e-11	1.52933e-10	9.69246e-11	5.22182e-13	1.79454e-09	5.30678e-11		31.1833	31.1833		0.0537407	0.000289528	0.00701063	0.0294239	1.19132	0.00589749	0.201212	0.611536
52	2022-03-07 10:42:19	1913931	1.31633e-10	2.47095e-10	1.78158e-09	1.22378e-11	1.50629e-10	8.52982e-11	4.9419e-13	1.77267e-09	5.22683e-11		31.8167	31.8167		0.0478778	0.000277389	0.00686907	0.0293382	1.2235	0.00607701	0.205607	0.630144
53	2022-03-07 10:42:58	1952176	1.18206e-10	2.37175e-10	1.76746e-09	1.20045e-11	1.46929e-10	7.65975e-11	4.7435e-13	1.75862e-09	5.09844e-11		32.4667	32.4667		0.0433376	0.000268379	0.00679195	0.0288461	1.25315	0.00625439	0.210047	0.649054
54	2022-03-07 10:43:36	1990421	1.25925e-10	2.3097e-10	1.75167e-09	1.15422e-11	1.44813e-10	8.15994e-11	4.6194e-13	1.74291e-09	5.02501e-11		33.1	33.1		0.0465838	0.000263714	0.00658925	0.028687	1.28162	0.00642288	0.214284	0.667273
55	2022-03-07 10:44:14	2028666	1.11531e-10	2.46512e-10	1.69998e-09	1.11122e-11	1.39304e-10	7.22721e-11	4.93024e-13	1.69148e-09	4.83385e-11		33.7333	33.7333		0.0425135	0.000290018	0.00653667	0.0284347	1.30984	0.00659823	0.218441	0.685362
56	2022-03-07 10:44:52	2066911	1.0751e-10	2.50065e-10	1.68082e-09	1.11552e-11	1.38719e-10	6.96665e-11	5.0013e-13	1.67242e-09	4.81355e-11		34.3667	34.3667		0.0414479	0.000297551	0.00663676	0.0286381	1.33642	0.00678429	0.222612	0.703435
57	2022-03-07 10:45:31	2105156	9.63951e-11	2.54016e-10	1.68105e-09	1.05264e-11	1.36083e-10	6.2464e-11	5.08032e-13	1.67264e-09	4.72208e-11		35.0167	35.0167		0.0371577	0.000302211	0.0062618	0.0280901	1.36197	0.00697922	0.226804	0.721871
58	2022-03-07 10:46:09	2143401	1.05446e-10	2.42468e-10	1.65549e-09	1.04113e-11	1.36635e-10	6.8329e-11	4.84936e-13	1.64721e-09	4.74123e-11		35.65	35.65		0.0412742	0.000292926	0.00628895	0.0286395	1.38681	0.00716768	0.230779	0.739836
59	2022-03-07 10:46:47	2181646	1.10606e-10	2.37676e-10	1.63598e-09	1.04382e-11	1.3223e-10	7.16727e-11	4.75352e-13	1.6278e-09	4.58838e-11		36.2833	36.2833		0.0438102	0.000290561	0.0063804	0.0280467	1.41375	0.00735245	0.234791	0.757786
60	2022-03-07 10:47:25	2219891	8.98268e-11	2.43963e-10	1.63599e-09	9.84485e-12	1.33526e-10	5.82078e-11	4.87926e-13	1.62781e-09	4.63335e-11		36.9167	36.9167		0.0355795	0.000298245	0.00601767	0.0283214	1.43889	0.0075389	0.238717	0.775636
61	2022-03-07 10:48:04	2258136	8.62471e-11	2.42386e-10	1.61688e-09	9.7395e-12	1.32359e-10	5.58881e-11	4.84772e-13	1.6088e-09	4.59286e-11		37.5667	37.5667		0.0345654	0.000299819	0.00602364	0.0284057	1.46169	0.00773327	0.24263	0.794072
62	2022-03-07 10:48:42	2296381	1.02909e-10	2.13402e-10	6.80743e-07	7.48092e-12	1.13796e-10	6.6685e-11	4.26804e-13	6.77339e-07	3.94872e-11		38.2	38.2		9.79592e-05	6.26968e-07	1.09893e-05	5.8006e-05	1.47267	0.00782842	0.244541	0.803086
63	2022-03-07 10:49:22	2336170	8.39466e-11	1.02698e-10	6.9624e-07	7.85395e-12	1.15184e-10	5.43974e-11	2.05396e-13	6.92759e-07	3.99688e-11		38.8667	38.8667		7.81302e-05	2.95007e-07	1.12805e-05	5.74067e-05	1.47272	0.00782872	0.244549	0.803124
64	2022-03-07 10:49:57	2371816	6.65853e-11	9.81619e-11	6.99644e-07	6.71767e-12	1.04236e-10	4.31473e-11	1.96324e-13	6.96146e-07	3.61699e-11		39.45	39.45		6.16703e-05	2.80605e-07	9.60155e-06	5.16976e-05	1.47276	0.00782889	0.244555	0.803156
65	2022-03-07 10:50:33	2407461	5.41261e-11	9.45793e-11	7.09498e-07	6.55999e-10	8.28686e-10	3.50737e-11	1.89159e-13	7.05951e-07	2.87554e-10		40.05	40.05		4.94345e-05	2.66609e-07	0.000924596	0.000405292	1.4728	0.00782905	0.244835	0.803293
66	2022-03-07 10:51:19	2453967	1.37351e-08	3.3111e-10	6.69544e-07	4.87869e-10	6.49085e-10	8.90034e-09	6.6222e-13	6.66196e-07	2.25232e-10		40.8167	40.8167		0.0132931	9.89061e-07	0.000728659	0.000336397	1.47791	0.00782954	0.245469	0.803578
67	2022-03-07 10:51:52	2486481	2.75501e-08	2.81107e-10	6.71963e-07	4.27971e-10	6.39351e-10	1.78525e-08	5.62214e-13	6.68603e-07	2.21855e-10		41.3667	41.3667		0.0265676	8.36674e-07	0.000636897	0.000330159	1.48887	0.00783004	0.245844	0.803761
68	2022-03-07 10:52:21	2515426	2.78209e-08	2.87372e-10	6.71694e-07	4.53664e-10	6.07669e-10	1.80279e-08	5.74744e-13	6.68336e-07	2.10861e-10		41.85	41.85		0.0268395	8.55663e-07	0.000675403	0.000313924	1.50178	0.00783045	0.246161	0.803917
69	2022-03-07 10:52:46	2540801	2.80876e-08	1.96253e-10	7.11828e-07	4.52865e-11	2.49736e-10	1.82008e-08	3.92506e-13	7.08269e-07	8.66584e-11		42.2667	42.2667		0.025569	5.51406e-07	6.362e-05	0.000121741	1.5127	0.00783074	0.246315	0.804007
70	2022-03-07 10:53:16	2570716	1.31537e-09	1.2689e-10	7.22578e-07	2.6919e-11	1.93678e-10	8.5236e-10	2.5378e-13	7.18965e-07	6.72063e-11		42.7667	42.7667		0.00117961	3.51215e-07	3.72541e-05	9.3009e-05	1.51939	0.00783097	0.24634	0.804061
71	2022-03-07 10:53:53	2607272	7.56347e-10	1.16724e-10	7.24728e-07	2.02583e-11	1.65329e-10	4.90113e-10	2.33448e-13	7.21104e-07	5.73692e-11		43.3833	43.3833		0.000676271	3.22118e-07	2.7953e-05	7.91596e-05	1.51996	0.00783117	0.246361	0.804114
72	2022-03-07 10:54:28	2642920	5.37982e-10	1.08031e-10	7.2634e-07	1.68742e-11	1.74236e-10	3.48612e-10	2.16062e-13	7.22708e-07	6.04599e-11		43.9667	43.9667		0.000479958	2.97467e-07	2.32318e-05	8.32391e-05	1.5203	0.00783135	0.246375	0.804162
73	2022-03-07 10:55:04	2678566	6.07503e-10	2.26026e-10	1.23826e-08	2.72652e-11	2.82423e-10	3.93662e-10	4.52052e-13	1.23207e-08	9.80008e-11		44.5667	44.5667		0.0317915	3.6507e-05	0.0022019	0.00791439	1.52998	0.0078424	0.247043	0.806561
74	2022-03-07 10:55:41	2715231	4.15024e-10	2.36428e-10	5.83062e-09	2.25341e-11	2.55308e-10	2.68936e-10	4.72856e-13	5.80147e-09	8.85919e-11		45.1833	45.1833		0.0461247	8.10988e-05	0.00386479	0.0151942	1.554	0.00787866	0.248914	0.813686
75	2022-03-07 10:56:20	2754496	3.46106e-10	2.34984e-10	3.82372e-09	1.94069e-11	2.30223e-10	2.24277e-10	4.69968e-13	3.8046e-09	7.98874e-11		45.8333	45.8333		0.0586541	0.000122909	0.0050754	0.0208926	1.58805	0.00794496	0.251819	0.825414
76	2022-03-07 10:56:58	2792741	2.65524e-10	2.4295e-10	2.96481e-09	1.70086e-11	2.09946e-10	1.7206e-10	4.859e-13	2.94999e-09	7.28513e-11		46.4667	46.4667		0.0580339	0.000163889	0.00573683	0.024572	1.62501	0.00803578	0.255243	0.839811
77	2022-03-07 10:57:36	2830986	2.62632e-10	2.27879e-10	2.54543e-09	1.49414e-11	1.99931e-10	1.70186e-10	4.55758e-13	2.5327e-09	6.93761e-11		47.1	47.1		0.0668592	0.00017905	0.00586989	0.0272551	1.66456	0.00814438	0.258918	0.856223
78	2022-03-07 10:58:15	2869231	2.03905e-10	2.41926e-10	2.30242e-09	1.37793e-11	1.88476e-10	1.3213e-10	4.83852e-13	2.29091e-09	6.54012e-11		47.75	47.75		0.0573876	0.000210149	0.0059847	0.0284054	1.70494	0.00827087	0.262771	0.874313
79	2022-03-07 10:58:52	2906436	1.84684e-10	2.25851e-10	2.16443e-09	1.27731e-11	1.78148e-10	1.19675e-10	4.51702e-13	2.15361e-09	6.18174e-11		48.3667	48.3667		0.0552918	0.000208693	0.00590137	0.0285606	1.73968	0.00840001	0.266436	0.891877
80	2022-03-07 10:59:30	2944681	1.77901e-10	2.40502e-10	2.0677e-09	1.21012e-11	1.71227e-10	1.1528e-10	4.81004e-13	2.05736e-09	5.94158e-11		49	49		0.0557527	0.000232628	0.00585249	0.0287352	1.77484	0.00853976	0.270158	0.910021
81	2022-03-07 11:00:08	2982926	1.40652e-10	2.30305e-10	2.02088e-09	1.16433e-11	1.64355e-10	9.11425e-11	4.6061e-13	2.01078e-09	5.70312e-11		49.6333	49.6333		0.0451004	0.000227925	0.0057615	0.028221	1.80678	0.0086856	0.273836	0.928057
82	2022-03-07 11:00:47	3021171	1.37836e-10	2.42847e-10	1.8944e-09	1.08424e-11	1.58092e-10	8.93177e-11	4.85694e-13	1.88493e-09	5.48579e-11		50.2833	50.2833		0.0471483	0.000256384	0.0057234	0.0289579	1.83676	0.008843	0.277568	0.94664
83	2022-03-07 11:01:25	3059416	1.56949e-10	2.27848e-10	1.85207e-09	1.01877e-11	1.58438e-10	1.01703e-10	4.55696e-13	1.84281e-09	5.4978e-11		50.9167	50.9167		0.0549131	0.000246047	0.00550071	0.0296846	1.86908	0.00900211	0.281123	0.96521
84	2022-03-07 11:02:03	3097661	1.3632e-10	2.31729e-10	1.84558e-09	1.01243e-11	1.50764e-10	8.83354e-11	4.63458e-13	1.83635e-09	5.23151e-11		51.55	51.55		0.0478632	0.000251118	0.0054857	0.0283462	1.90163	0.00915954	0.284602	0.983587
85	2022-03-07 11:02:41	3135906	1.32439e-10	2.37963e-10	1.80915e-09	9.58578e-12	1.4858e-10	8.58205e-11	4.75926e-13	1.8001e-09	5.15573e-11		52.1833	52.1833		0.0474369	0.000263066	0.0052985	0.0284981	1.9318	0.00932237	0.288017	1.00159
86	2022-03-07 11:03:20	3174151	1.26344e-10	2.27787e-10	1.78605e-09	9.54063e-12	1.43921e-10	8.18709e-11	4.55574e-13	1.77712e-09	4.99406e-11		52.8333	52.8333		0.0458391	0.000255073	0.00534175	0.0279615	1.96212	0.00949076	0.291475	1.01994
87	2022-03-07 11:03:58	3212396	1.24732e-10	2.31902e-10	1.75538e-09	8.92143e-12	1.41579e-10	8.08263e-11	4.63804e-13	1.7466e-09	4.91279e-11		53.4667	53.4667		0.0460449	0.000264219	0.00508234	0.0279871	1.99122	0.0096552	0.294776	1.03765
88	2022-03-07 11:04:36	3250641	1.20324e-10	2.16012e-10	1.74319e-09	8.7978e-12	1.39289e-10	7.797e-11	4.32024e-13	1.73447e-09	4.83333e-11		54.1	54.1		0.0447283	0.000247835	0.00504695	0.0277269	2.01996	0.00981735	0.297983	1.0553
89	2022-03-07 11:05:14	3288886	1.24248e-10	2.49532e-10	1.69179e-09	8.7978e-12	1.35138e-10	8.05127e-11	4.99064e-13	1.68333e-09	4.68929e-11		54.7333	54.7333		0.0475902	0.000294992	0.00520029	0.0277179	2.04919	0.00998925	0.301228	1.07285
90	2022-03-07 11:05:53	3327131	1.11853e-10	2.37144e-10	1.65706e-09	8.6817e-12	1.33516e-10	7.24807e-11	4.74288e-13	1.64877e-09	4.63301e-11		55.3833	55.3833		0.0437406	0.000286223	0.00523922	0.0279592	2.07888	0.0101781	0.304621	1.09095
91	2022-03-07 11:06:31	3365376	1.22066e-10	2.38383e-10	1.65569e-09	8.16355e-12	1.29619e-10	7.90988e-11	4.76766e-13	1.64741e-09	4.49778e-11		56.0167	56.0167		0.0477739	0.000287956	0.0049306	0.0271656	2.10786	0.01036	0.307842	1.10841
92	2022-03-07 11:07:09	3403621	1.10499e-10	2.29507e-10	1.63452e-09	7.88405e-12	1.284e-10	7.16034e-11	4.59014e-13	1.62635e-09	4.45548e-11		56.65	56.65		0.043807	0.000280825	0.00482346	0.0272586	2.13686	0.0105401	0.310931	1.12564
93	2022-03-07 11:07:47	3441866	1.07005e-10	2.14078e-10	1.63558e-09	7.9378e-12	1.29399e-10	6.93392e-11	4.28156e-13	1.6274e-09	4.49015e-11		57.2833	57.2833		0.0423943	0.000261776	0.0048532	0.0274529	2.16415	0.0107119	0.313995	1.14297
94	2022-03-07 11:08:26	3480111	1.0479e-10	2.17497e-10	1.61082e-09	7.9765e-12	1.28491e-10	6.79039e-11	4.34994e-13	1.60277e-09	4.45864e-11		57.9333	57.9333		0.0421549	0.000270045	0.00495183	0.0276793	2.19163	0.0108847	0.317181	1.16088
95	2022-03-07 11:09:04	3518356	9.35463e-11	2.23579e-10	1.61282e-09	7.60025e-12	1.2554e-10	6.0618e-11	4.47158e-13	1.60476e-09	4.35624e-11		58.5667	58.5667		0.0375851	0.000277252	0.0047124	0.0270101	2.21688	0.0110581	0.320242	1.1782
96	2022-03-07 11:09:42	3556601	9.56103e-11	2.07371e-10	6.85401e-07	5.4567e-12	1.06622e-10	6.19555e-11	4.14742e-13	6.81974e-07	3.69978e-11		59.2	59.2		9.0393e-05	6.05109e-07	7.96132e-06	5.39798e-05	2.22881	0.011146	0.321737	1.18677
97	2022-03-07 11:10:22	3596390	8.89346e-11	1.14728e-10	6.99823e-07	5.80392e-12	1.10283e-10	5.76296e-11	2.29456e-13	6.96324e-07	3.82682e-11		59.8667	59.8667		8.23489e-05	3.27877e-07	8.29341e-06	5.46827e-05	2.22887	0.0111464	0.321742	1.18681
98	2022-03-07 11:10:58	3632036	6.74776e-11	9.93705e-11	7.02601e-07	5.17612e-12	9.88229e-11	4.37255e-11	1.98741e-13	6.99088e-07	3.42915e-11		60.4667	60.4667		6.22337e-05	2.82865e-07	7.36708e-06	4.88066e-05	2.22892	0.0111465	0.321747	1.18684
99	2022-03-07 11:11:33	3667681	4.76331e-11	9.51219e-11	7.11111e-07	5.98863e-10	6.96931e-10	3.08662e-11	1.90244e-13	7.07555e-07	2.41835e-10		61.05	61.05		4.34057e-05	2.6753e-07	0.000842151	0.000340081	2.22895	0.0111467	0.321994	1.18695
100	2022-03-07 11:12:16	3710618	2.64046e-08	2.83482e-10	6.73397e-07	3.7877e-10	5.06926e-10	1.71102e-08	5.66964e-13	6.7003e-07	1.75903e-10		61.7667	61.7667		0.0254088	8.41946e-07	0.000562477	0.000261218	2.23807	0.0111471	0.322498	1.18717
101	2022-03-07 11:12:41	3735992	2.73687e-08	2.54037e-10	6.73934e-07	3.9818e-10	4.87282e-10	1.77349e-08	5.08074e-13	6.70564e-07	1.69087e-10		62.1833	62.1833		0.0263155	7.53893e-07	0.000590829	0.000250895	2.24884	0.0111474	0.322738	1.18727
102	2022-03-07 11:13:07	3761369	2.79062e-08	2.30356e-10	6.74651e-07	4.28502e-10	4.73691e-10	1.80832e-08	4.60712e-13	6.71278e-07	1.64371e-10		62.6167	62.6167		0.0268038	6.82889e-07	0.000635146	0.000243638	2.26035	0.0111477	0.323004	1.18738
103	2022-03-07 11:13:32	3786744	2.78209e-08	2.28166e-10	6.73665e-07	4.31761e-10	4.60033e-10	1.80279e-08	4.56332e-13	6.70297e-07	1.59631e-10		63.0333	63.0333		0.026761	6.77387e-07	0.000640914	0.00023696	2.27151	0.011148	0.32327	1.18748
104	2022-03-07 11:14:00	3814710	2.71544e-09	1.17318e-10	7.24728e-07	2.89734e-11	1.86071e-10	1.75961e-09	2.34636e-13	7.21104e-07	6.45666e-11		63.5	63.5		0.00242795	3.23757e-07	3.99783e-05	8.90909e-05	2.27832	0.0111483	0.323428	1.18756
105	2022-03-07 11:14:30	3844136	1.04214e-09	1.11462e-10	7.26251e-07	2.10807e-11	1.63069e-10	6.75307e-10	2.22924e-13	7.2262e-07	5.65849e-11		64	64		0.000929853	3.06952e-07	2.90267e-05	7.79138e-05	2.27916	0.0111484	0.323446	1.1876
106	2022-03-07 11:15:06	3880692	6.64886e-10	1.01797e-10	7.28043e-07	1.65066e-11	1.42068e-10	4.30846e-10	2.03594e-13	7.24403e-07	4.92976e-11		64.6	64.6		0.000591787	2.79646e-07	2.26726e-05	6.77125e-05	2.27962	0.0111486	0.323461	1.18764
107	2022-03-07 11:15:42	3916340	4.93026e-10	1.53745e-10	4.49298e-08	2.99484e-11	3.34258e-10	3.19481e-10	3.0749e-13	4.47052e-08	1.15988e-10		65.2	65.2		0.00711067	6.84379e-06	0.00066656	0.00258153	2.28193	0.0111507	0.323668	1.18844
108	2022-03-07 11:16:19	3953006	4.87683e-10	2.16545e-10	8.81375e-09	2.2146e-11	2.6613e-10	3.16019e-10	4.3309e-13	8.76968e-09	9.23471e-11		65.8167	65.8167		0.0358552	4.9138e-05	0.00251266	0.0104776	2.29518	0.011168	0.324648	1.19246
109	2022-03-07 11:16:55	3989151	3.75937e-10	2.2406e-10	4.82773e-09	1.86437e-11	2.33458e-10	2.43607e-10	4.4812e-13	4.80359e-09	8.10099e-11		66.4167	66.4167		0.05046	9.28221e-05	0.00386179	0.0167801	2.32107	0.0112106	0.326561	1.20064
110	2022-03-07 11:17:34	4028416	3.07438e-10	2.19596e-10	3.39477e-09	1.58401e-11	2.19952e-10	1.9922e-10	4.39192e-13	3.3778e-09	7.63233e-11		67.0667	67.0667		0.0586843	0.000129373	0.00466603	0.0224826	2.35654	0.0112828	0.329332	1.2134
111	2022-03-07 11:18:12	4066661	2.60343e-10	2.36141e-10	2.74088e-09	1.41921e-11	1.99994e-10	1.68702e-10	4.72282e-13	2.72718e-09	6.93979e-11		67.7	67.7		0.0615504	0.00017231	0.00517794	0.0253196	2.39462	0.0113783	0.332449	1.22854
112	2022-03-07 11:18:50	4104906	2.25566e-10	2.37861e-10	2.42279e-09	1.3044e-11	1.85433e-10	1.46167e-10	4.75722e-13	2.41068e-09	6.43453e-11		68.3333	68.3333		0.0603299	0.000196353	0.00538388	0.0265583	2.43321	0.0114951	0.335794	1.24497
113	2022-03-07 11:19:29	4143151	2.07571e-10	2.24418e-10	2.17448e-09	1.14444e-11	1.76141e-10	1.34506e-10	4.48836e-13	2.16361e-09	6.11209e-11		68.9833	68.9833		0.0618566	0.000206411	0.00526305	0.0281083	2.47292	0.011626	0.339254	1.26273
114	2022-03-07 11:20:07	4181396	1.89855e-10	2.25207e-10	2.09918e-09	1.07607e-11	1.6578e-10	1.23026e-10	4.50414e-13	2.08868e-09	5.75257e-11		69.6167	69.6167		0.0586067	0.000214567	0.00512614	0.0274039	2.51107	0.0117593	0.342544	1.28031
115	2022-03-07 11:20:45	4219641	1.67022e-10	2.27981e-10	2.00999e-09	9.87388e-12	1.60117e-10	1.0823e-10	4.55962e-13	1.99994e-09	5.55606e-11		70.25	70.25		0.0538462	0.000226848	0.0049124	0.0276422	2.54668	0.0118991	0.345723	1.29774
116	2022-03-07 11:21:23	4257886	1.67334e-10	2.37779e-10	1.95115e-09	9.32025e-12	1.5636e-10	1.08432e-10	4.75558e-13	1.94139e-09	5.42569e-11		70.8833	70.8833		0.0555736	0.000243732	0.0047768	0.0278077	2.58133	0.0120481	0.348791	1.3153
117	2022-03-07 11:22:02	4296131	1.40663e-10	2.24551e-10	1.86738e-09	9.15685e-12	1.50491e-10	9.11496e-11	4.49102e-13	1.85804e-09	5.22204e-11		71.5333	71.5333		0.0488115	0.000240498	0.00490358	0.0279645	2.61525	0.0122055	0.351937	1.33343
118	2022-03-07 11:22:40	4334376	1.27419e-10	2.37267e-10	4.41738e-09	1.32386e-11	1.91475e-10	8.25675e-11	4.74534e-13	4.39529e-09	6.64418e-11		72.1667	72.1667		0.0186915	0.000107424	0.00299693	0.015041	2.63663	0.0123156	0.354439	1.34705
119	2022-03-07 11:23:18	4372621	2.16117e-10	2.23067e-10	2.18395e-09	1.22292e-11	1.85596e-10	1.40044e-10	4.46134e-13	2.17303e-09	6.44018e-11		72.8	72.8		0.0641241	0.000204278	0.00559958	0.0294887	2.66286	0.0124143	0.357161	1.36115
120	2022-03-07 11:23:56	4410866	2.15666e-10	2.38844e-10	2.25368e-09	1.17906e-11	1.8347e-10	1.39752e-10	4.77688e-13	2.24241e-09	6.36641e-11		73.4333	73.4333		0.0620104	0.000211959	0.00523171	0.0282489	2.7028	0.0125461	0.360591	1.37943
121	2022-03-07 11:24:35	4449111	2.35231e-10	2.33039e-10	2.27989e-09	1.18959e-11	1.83643e-10	1.5243e-10	4.66078e-13	2.26849e-09	6.37241e-11		74.0833	74.0833		0.0668584	0.00020443	0.00521775	0.0279505	2.74468	0.0126815	0.363987	1.3977
122	2022-03-07 11:25:13	4487356	1.11627e-10	2.3996e-10	8.48325e-09	5.44595e-12	2.39063e-10	7.23343e-11	4.7992e-13	8.44083e-09	8.29549e-11		74.7167	74.7167		0.00852672	5.65727e-05	0.000641965	0.00977867	2.76855	0.0127641	0.365843	1.40965
123	2022-03-07 11:25:51	4525601	1.61142e-11	2.18551e-10	8.70675e-09	5.54162e-12	2.52519e-10	1.0442e-11	4.37102e-13	8.66322e-09	8.76241e-11		75.35	75.35		0.0011993	5.02027e-05	0.000636474	0.0100639	2.77163	0.0127979	0.366248	1.41593
124	2022-03-07 11:26:29	4563846	8.62471e-11	2.19156e-10	5.37529e-09	9.36218e-12	2.08751e-10	5.58881e-11	4.38312e-13	5.34841e-09	7.24366e-11		75.9833	75.9833		0.0103972	8.1542e-05	0.00174171	0.0134758	2.7753	0.0128396	0.367001	1.42338
125	2022-03-07 11:27:08	4602091	2.10914e-10	2.29824e-10	2.11022e-09	9.56535e-12	1.49099e-10	1.36672e-10	4.59648e-13	2.09967e-09	5.17374e-11		76.6333	76.6333		0.0647668	0.00021782	0.00453287	0.0245175	2.79973	0.0129369	0.36904	1.43573
126	2022-03-07 11:27:46	4640336	1.21464e-10	2.24459e-10	1.83134e-09	7.66045e-12	1.28324e-10	7.87087e-11	4.48918e-13	1.82218e-09	4.45284e-11		77.2667	77.2667		0.0429787	0.000245131	0.00418298	0.0243147	2.83385	0.0130835	0.3718	1.45119
127	2022-03-07 11:28:24	4678581	1.1682e-10	2.26487e-10	1.81359e-09	6.81012e-12	1.25636e-10	7.56994e-11	4.52974e-13	1.80452e-09	4.35957e-11		77.9	77.9		0.0417401	0.000249766	0.00375505	0.0240383	2.86068	0.0132403	0.374314	1.46651
128	2022-03-07 11:29:02	4716826	9.47288e-11	2.23814e-10	1.83332e-09	6.67467e-12	1.19143e-10	6.13843e-11	4.47628e-13	1.82415e-09	4.13426e-11		78.5333	78.5333		0.0334826	0.000244163	0.00364076	0.0225507	2.8845	0.0133967	0.376656	1.48126
129	2022-03-07 11:29:41	4755071	9.31163e-11	2.39652e-10	1.79651e-09	6.4629e-12	1.22833e-10	6.03394e-11	4.79304e-13	1.78753e-09	4.26231e-11		79.1833	79.1833		0.033587	0.000266797	0.00359748	0.0237255	2.9063	0.0135627	0.379008	1.4963
130	2022-03-07 11:30:19	4793316	9.74055e-11	2.38629e-10	1.80029e-09	6.3339e-12	1.19114e-10	6.31188e-11	4.77258e-13	1.79129e-09	4.13326e-11		79.8167	79.8167		0.0350603	0.000265101	0.00351827	0.0229588	2.92804	0.0137312	0.381262	1.51108
131	2022-03-07 11:30:57	4831561	9.05363e-11	1.53284e-10	6.47865e-07	4.6999e-12	1.09309e-10	5.86675e-11	3.06568e-13	6.44626e-07	3.79302e-11		80.45	80.45		9.05552e-05	4.73197e-07	7.25444e-06	5.85465e-05	2.93917	0.0138153	0.382378	1.51837
132	2022-03-07 11:31:37	4871350	7.45618e-11	1.00394e-10	6.71694e-07	4.99767e-12	1.03992e-10	4.8316e-11	2.00788e-13	6.68336e-07	3.60852e-11		81.1167	81.1167		7.19316e-05	2.98928e-07	7.4404e-06	5.37227e-05	2.93922	0.0138155	0.382383	1.51841
133	2022-03-07 11:32:12	4906996	6.21564e-11	8.33789e-11	6.72322e-07	4.39997e-12	9.50557e-11	4.02773e-11	1.66758e-13	6.6896e-07	3.29843e-11		81.7	81.7		5.99078e-05	2.48033e-07	6.54444e-06	4.90603e-05	2.93926	0.0138157	0.382387	1.51844
134	2022-03-07 11:32:48	4942641	4.94176e-11	8.34096e-11	6.5763e-07	4.74618e-10	4.54409e-10	3.20226e-11	1.66819e-13	6.54342e-07	1.5768e-10		82.3	82.3		4.8694e-05	2.53667e-07	0.00072171	0.00023977	2.93929	0.0138158	0.382605	1.51853
135	2022-03-07 11:33:31	4985168	1.73968e-08	2.40001e-10	6.46343e-07	4.3359e-10	3.78251e-10	1.12731e-08	4.80002e-13	6.43111e-07	1.31253e-10		83.0167	83.0167		0.0174414	7.42643e-07	0.000670836	0.00020307	2.94556	0.0138162	0.383104	1.51868
136	2022-03-07 11:33:58	5012084	1.98303e-08	2.15234e-10	6.53688e-07	4.44111e-10	3.56823e-10	1.285e-08	4.30468e-13	6.5042e-07	1.23818e-10		83.4667	83.4667		0.0196577	6.58522e-07	0.000679393	0.000189414	2.95391	0.0138165	0.383408	1.51877
137	2022-03-07 11:34:25	5039001	2.33919e-08	1.90981e-10	6.58257e-07	4.54781e-10	3.40132e-10	1.5158e-08	3.81962e-13	6.54966e-07	1.18026e-10		83.9167	83.9167		0.0230274	5.80263e-07	0.000690887	0.0001793	2.96351	0.0138168	0.383717	1.51886
138	2022-03-07 11:34:51	5065916	2.52899e-08	1.8322e-10	6.59063e-07	1.17436e-10	2.18902e-10	1.63879e-08	3.6644e-13	6.55768e-07	7.5959e-11		84.35	84.35		0.0248654	5.56001e-07	0.000178186	0.000115253	2.97389	0.013817	0.383905	1.51892
139	2022-03-07 11:35:21	5095422	1.89199e-09	9.96571e-11	6.98122e-07	2.83015e-11	1.425e-10	1.22601e-09	1.99314e-13	6.94631e-07	4.94475e-11		84.85	84.85		0.00175615	2.85501e-07	4.05395e-05	7.08293e-05	2.98054	0.0138172	0.38396	1.51897
140	2022-03-07 11:35:57	5131977	7.83211e-10	1.01295e-10	6.97494e-07	1.85104e-11	1.22684e-10	5.07521e-10	2.0259e-13	6.94007e-07	4.25713e-11		85.45	85.45		0.000727635	2.90454e-07	2.65384e-05	6.10347e-05	2.98129	0.0138174	0.38398	1.51901
141	2022-03-07 11:36:33	5167625	5.39724e-10	9.68724e-11	6.96598e-07	1.49898e-11	1.1432e-10	3.49741e-10	1.93745e-13	6.93115e-07	3.9669e-11		86.05	86.05		0.00050207	2.7813e-07	2.15186e-05	5.69468e-05	2.98166	0.0138176	0.383994	1.51904
142	2022-03-07 11:37:09	5203271	5.89539e-10	2.05396e-10	1.76635e-08	1.86931e-11	2.23989e-10	3.82021e-10	4.10792e-13	1.75752e-08	7.77242e-11		86.65	86.65		0.0216277	2.32565e-05	0.00105829	0.00440027	2.9883	0.0138246	0.384318	1.52038
143	2022-03-07 11:37:45	5239936	3.90557e-10	2.10873e-10	6.09388e-09	1.71161e-11	1.98405e-10	2.53081e-10	4.21746e-13	6.06341e-09	6.88465e-11		87.25	87.25		0.0415303	6.92081e-05	0.00280874	0.0112977	3.00724	0.0138524	0.385478	1.52509
144	2022-03-07 11:38:25	5279201	3.19048e-10	2.13678e-10	3.95197e-09	1.57906e-11	1.79851e-10	2.06743e-10	4.27356e-13	3.93221e-09	6.24083e-11		87.9167	87.9167		0.0523139	0.000108137	0.00399563	0.0157917	3.03853	0.0139115	0.387746	1.53412
145	2022-03-07 11:39:03	5317446	2.63202e-10	2.20333e-10	3.11572e-09	1.38804e-11	1.69211e-10	1.70555e-10	4.40666e-13	3.10014e-09	5.87162e-11		88.55	88.55		0.0547401	0.000141433	0.00445496	0.0188452	3.07243	0.0139905	0.390422	1.54509
146	2022-03-07 11:39:41	5355691	2.26136e-10	2.30694e-10	2.71518e-09	1.25151e-11	1.59532e-10	1.46536e-10	4.61388e-13	2.7016e-09	5.53576e-11		89.1833	89.1833		0.0539692	0.000169929	0.00460931	0.0203882	3.10685	0.0140891	0.393293	1.55751
147	2022-03-07 11:40:19	5393936	2.05227e-10	2.18829e-10	2.4965e-09	1.18454e-11	1.52477e-10	1.32987e-10	4.37658e-13	2.48402e-09	5.29095e-11		89.8167	89.8167		0.0532694	0.000175309	0.0047448	0.0211935	3.14081	0.0141985	0.396255	1.57068
148	2022-03-07 11:40:58	5432181	1.84319e-10	2.1677e-10	2.34931e-09	1.04049e-11	1.46852e-10	1.19439e-10	4.3354e-13	2.33756e-09	5.09576e-11		90.4667	90.4667		0.0508399	0.000184539	0.00442892	0.0216905	3.17464	0.0143154	0.399236	1.58461
149	2022-03-07 11:41:36	5470426	1.58207e-10	2.14529e-10	2.2021e-09	9.9803e-12	1.5193e-10	1.02518e-10	4.29058e-13	2.19109e-09	5.27197e-11		91.1	91.1		0.0465547	0.00019484	0.00453217	0.0239407	3.20549	0.0144355	0.402074	1.59906
150	2022-03-07 11:42:14	5508671	1.67678e-10	2.1893e-10	2.13304e-09	9.19663e-12	1.63294e-10	1.08655e-10	4.3786e-13	2.12237e-09	5.6663e-11		91.7333	91.7333		0.0509392	0.000205275	0.00431151	0.0265644	3.23636	0.0145622	0.404874	1.61506
151	2022-03-07 11:42:52	5546916	1.24904e-10	2.31533e-10	2.09234e-09	8.18075e-12	1.8694e-10	8.09378e-11	4.63066e-13	2.08188e-09	6.48682e-11		92.3667	92.3667		0.0386829	0.000221315	0.00390986	0.0310027	3.26474	0.0146973	0.407478	1.63329
152	2022-03-07 11:43:31	5585161	1.34654e-10	2.14098e-10	1.98247e-09	7.0692e-12	2.23441e-10	8.72558e-11	4.28196e-13	1.97256e-09	7.7534e-11		93.0167	93.0167		0.0440137	0.000215991	0.00356585	0.0391098	3.29162	0.0148395	0.409907	1.65607
153	2022-03-07 11:44:09	5623406	9.66853e-11	2.2919e-10	1.96043e-09	6.34572e-12	2.52644e-10	6.26521e-11	4.5838e-13	1.95063e-09	8.76675e-11		93.65	93.65		0.0319583	0.000233816	0.0032369	0.0447185	3.31567	0.0149819	0.412062	1.68262
154	2022-03-07 11:44:47	5661651	4.57304e-11	2.32384e-10	1.92863e-09	5.30942e-12	2.55082e-10	2.96333e-11	4.64768e-13	1.91899e-09	8.85135e-11		94.2833	94.2833		0.0153649	0.000240983	0.00275295	0.0458945	3.33066	0.0151322	0.413958	1.71131
155	2022-03-07 11:45:25	5699896	7.16916e-11	2.57866e-10	1.88951e-09	5.4481e-12	2.42355e-10	4.64562e-11	5.15732e-13	1.88006e-09	8.40972e-11		94.9167	94.9167		0.0245864	0.000272945	0.00288334	0.0445074	3.34331	0.015295	0.415743	1.73994
156	2022-03-07 11:46:04	5738141	5.31694e-11	2.79356e-10	1.88221e-09	5.36962e-12	2.22549e-10	3.44538e-11	5.58712e-13	1.8728e-09	7.72245e-11		95.5667	95.5667		0.018305	0.000296838	0.00285283	0.0410286	3.35725	0.0154802	0.417607	1.76774
157	2022-03-07 11:46:42	5776386	6.75206e-11	3.01675e-10	1.84531e-09	5.35672e-12	2.08349e-10	4.37533e-11	6.0335e-13	1.83608e-09	7.22971e-11		96.2	96.2		0.0237106	0.000326964	0.00290288	0.0391788	3.37056	0.0156777	0.41943	1.79314
158	2022-03-07 11:47:20	5814631	4.76116e-11	3.16981e-10	1.84637e-09	5.3879e-12	1.96893e-10	3.08523e-11	6.33962e-13	1.83714e-09	6.83219e-11		96.8333	96.8333		0.0167097	0.000343356	0.0029181	0.0370033	3.38336	0.01589	0.421273	1.81726
159	2022-03-07 11:47:58	5852876	6.76926e-11	2.98102e-10	1.82712e-09	5.43412e-12	1.84434e-10	4.38648e-11	5.96204e-13	1.81798e-09	6.39986e-11		97.4667	97.4667		0.0240076	0.000326308	0.00297415	0.035027	3.39625	0.016102	0.423139	1.84007
160	2022-03-07 11:48:37	5891121	7.10251e-11	2.97139e-10	1.82158e-09	5.77382e-12	1.75634e-10	4.60243e-11	5.94278e-13	1.81247e-09	6.0945e-11		98.1167	98.1167		0.0252661	0.000326243	0.00316968	0.0334572	3.41226	0.0163141	0.425136	1.86233
161	2022-03-07 11:49:15	5929366	6.96813e-11	2.72466e-10	1.78838e-09	5.676e-12	1.65248e-10	4.51535e-11	5.44932e-13	1.77944e-09	5.73411e-11		98.75	98.75		0.0252483	0.000304707	0.00317382	0.0320631	3.42826	0.0165139	0.427145	1.88308
162	2022-03-07 11:49:53	5967611	8.58493e-11	2.6579e-10	1.77471e-09	6.05655e-12	1.61432e-10	5.56303e-11	5.3158e-13	1.76584e-09	5.60169e-11		99.3833	99.3833		0.0313462	0.000299531	0.0034127	0.031564	3.44618	0.0167053	0.429231	1.90323
163	2022-03-07 11:50:31	6005856	7.42608e-11	2.7224e-10	1.81629e-09	6.1447e-12	1.54152e-10	4.8121e-11	5.4448e-13	1.80721e-09	5.34907e-11		100.017	100.017		0.0264941	0.000299776	0.00338311	0.0294506	3.4645	0.016895	0.431383	1.92255
164	2022-03-07 11:51:10	6044101	7.38631e-11	2.56596e-10	1.77765e-09	6.02967e-12	1.50764e-10	4.78633e-11	5.13192e-13	1.76876e-09	5.23151e-11		100.667	100.667		0.026925	0.000288691	0.00339193	0.0294294	3.48186	0.0170863	0.433584	1.94168
165	2022-03-07 11:51:48	6082346	7.74106e-11	2.47843e-10	3.82699e-07	4.86545e-12	1.46282e-10	5.01621e-11	4.95686e-13	3.80786e-07	5.07599e-11		101.3	101.3		0.000131074	1.29524e-06	1.27135e-05	0.000132636	3.49043	0.0171781	0.434663	1.95104
166	2022-03-07 11:52:28	6122135	5.61149e-11	1.49598e-10	6.61482e-07	4.96327e-12	1.30426e-10	3.63625e-11	2.99196e-13	6.58175e-07	4.52578e-11		101.967	101.967		5.49712e-05	4.52312e-07	7.50326e-06	6.84188e-05	3.49049	0.0171787	0.434669	1.95111
167	2022-03-07 11:53:03	6157781	4.44189e-11	1.2217e-10	6.63901e-07	4.53865e-12	1.14646e-10	2.87834e-11	2.4434e-13	6.60581e-07	3.97822e-11		102.55	102.55		4.3355e-05	3.68037e-07	6.83634e-06	5.99218e-05	3.49052	0.0171789	0.434674	1.95115
168	2022-03-07 11:53:39	6193426	3.66466e-11	9.79886e-11	6.65244e-07	4.13875e-12	1.23654e-10	2.3747e-11	1.95977e-13	6.61918e-07	4.29079e-11		103.15	103.15		3.56967e-05	2.94594e-07	6.2214e-06	6.44995e-05	3.49054	0.0171791	0.434677	1.95119
169	2022-03-07 11:54:21	6235953	2.18715e-08	8.68055e-10	6.42222e-07	4.53037e-10	1.06516e-09	1.41727e-08	1.73611e-12	6.39011e-07	3.69611e-10		103.85	103.85		0.0220683	2.70329e-06	0.000705421	0.000575518	3.49828	0.0171802	0.434926	1.95141
170	2022-03-07 11:54:52	6266439	2.50381e-08	5.7881e-10	6.35951e-07	3.25318e-10	6.99833e-10	1.62247e-08	1.15762e-12	6.32771e-07	2.42842e-10		104.367	104.367		0.0255125	1.8203e-06	0.000511546	0.000381857	3.51057	0.0171814	0.435241	1.95166
171	2022-03-07 11:55:22	6296515	2.02973e-08	4.33674e-10	6.34069e-07	4.17444e-10	6.93509e-10	1.31527e-08	8.67348e-13	6.30899e-07	2.40648e-10		104.867	104.867		0.0207432	1.36791e-06	0.000658357	0.000379529	3.52213	0.0171822	0.435533	1.95185
172	2022-03-07 11:55:53	6327001	2.33624e-08	3.35061e-10	6.49657e-07	9.14793e-11	3.36461e-10	1.51388e-08	6.70122e-13	6.46409e-07	1.16752e-10		105.383	105.383		0.0233028	1.0315e-06	0.000140812	0.000179713	3.53351	0.0171828	0.43574	1.95199
173	2022-03-07 11:56:22	6356507	1.67976e-09	1.59877e-10	6.85848e-07	2.70491e-11	2.10864e-10	1.08848e-09	3.19754e-13	6.82419e-07	7.31698e-11		105.867	105.867		0.00158706	4.66217e-07	3.94389e-05	0.000106685	3.53953	0.0171831	0.435783	1.95206
174	2022-03-07 11:56:59	6393062	7.48145e-10	1.28887e-10	6.90686e-07	1.79202e-11	1.73061e-10	4.84798e-10	2.57774e-13	6.87233e-07	6.00522e-11		106.483	106.483		0.000701908	3.73214e-07	2.59455e-05	8.69457e-05	3.54023	0.0171834	0.435804	1.95212
175	2022-03-07 11:57:34	6428710	5.24706e-10	1.19222e-10	6.89252e-07	1.44985e-11	1.511e-10	3.40009e-10	2.38444e-13	6.85806e-07	5.24317e-11		107.067	107.067		0.000493302	3.45946e-07	2.10351e-05	7.60704e-05	3.54058	0.0171836	0.435817	1.95217
176	2022-03-07 11:58:10	6464356	3.58952e-10	1.85145e-10	3.8504e-08	1.93306e-11	2.83839e-10	2.32601e-10	3.7029e-13	3.83115e-08	9.84921e-11		107.667	107.667		0.00604095	9.61692e-06	0.000502041	0.00255797	3.54254	0.0171866	0.435974	1.95296
177	2022-03-07 11:58:47	6501021	3.60328e-10	2.09348e-10	7.0027e-09	1.6197e-11	2.56494e-10	2.33493e-10	4.18696e-13	6.96769e-09	8.90034e-11		108.283	108.283		0.0333432	5.97907e-05	0.00231296	0.0127099	3.55468	0.017208	0.436842	1.95767
178	2022-03-07 11:59:26	6540286	2.87443e-10	2.10986e-10	4.33758e-09	1.31354e-11	2.59848e-10	1.86263e-10	4.21972e-13	4.31589e-09	9.01673e-11		108.933	108.933		0.0429417	9.72828e-05	0.00302828	0.0207875	3.57948	0.017259	0.438578	1.96855
179	2022-03-07 12:00:04	6578531	2.35757e-10	2.10884e-10	3.26543e-09	1.08951e-11	2.74557e-10	1.52771e-10	4.21768e-13	3.2491e-09	9.52713e-11		109.567	109.567		0.0467842	0.000129162	0.0033365	0.0291757	3.60789	0.0173308	0.440594	1.98438
180	2022-03-07 12:00:42	6616776	1.7674e-10	2.21685e-10	2.77863e-09	9.82765e-12	2.78094e-10	1.14528e-10	4.4337e-13	2.76474e-09	9.64986e-11		110.2	110.2		0.0412173	0.000159564	0.00353687	0.0347288	3.63576	0.0174222	0.44277	2.00461
181	2022-03-07 12:01:21	6655021	1.49661e-10	2.38782e-10	2.55212e-09	8.27213e-12	2.71706e-10	9.69803e-11	4.77564e-13	2.53936e-09	9.4282e-11		110.85	110.85		0.0379999	0.000187124	0.00324128	0.0369426	3.6615	0.0175349	0.444973	2.02791
182	2022-03-07 12:01:59	6693266	1.44017e-10	2.43512e-10	2.38333e-09	7.45512e-12	2.61834e-10	9.3323e-11	4.87024e-13	2.37141e-09	9.08564e-11		111.483	111.483		0.0391566	0.000204346	0.00312803	0.0381216	3.68594	0.0176588	0.44699	2.05168
183	2022-03-07 12:02:37	6731511	1.25506e-10	2.2409e-10	2.30325e-09	7.02942e-12	2.46309e-10	8.13279e-11	4.4818e-13	2.29173e-09	8.54692e-11		112.117	112.117		0.0353101	0.000194586	0.00305196	0.0371081	3.70952	0.0177851	0.448947	2.0755
184	2022-03-07 12:03:15	6769756	9.47181e-11	2.40021e-10	2.2072e-09	7.13692e-12	2.37834e-10	6.13773e-11	4.80042e-13	2.19616e-09	8.25284e-11		112.75	112.75		0.0278078	0.000217489	0.00323347	0.0373905	3.7295	0.0179156	0.450937	2.09909
185	2022-03-07 12:03:54	6808001	1.1224e-10	3.48289e-10	2.34692e-08	1.25882e-11	3.16391e-10	7.27315e-11	6.96578e-13	2.33519e-08	1.09788e-10		113.4	113.4		0.00309902	2.96805e-05	0.000536371	0.00467795	3.73955	0.017996	0.452163	2.11276
186	2022-03-07 12:04:33	6847266	1.76858e-10	2.59258e-10	3.83703e-09	9.60083e-12	2.72849e-10	1.14604e-10	5.18516e-13	3.81784e-09	9.46786e-11		114.05	114.05		0.0298679	0.000135135	0.00250215	0.024675	3.75026	0.0180495	0.45315	2.1223
187	2022-03-07 12:05:12	6886531	1.29892e-10	2.39273e-10	2.63791e-09	7.6841e-12	2.1212e-10	8.417e-11	4.78546e-13	2.62472e-09	7.36056e-11		114.7	114.7		0.0319078	0.000181411	0.00291295	0.027903	3.77034	0.0181524	0.45491	2.13939
188	2022-03-07 12:05:50	6924776	1.01372e-10	2.43512e-10	2.32166e-09	6.5016e-12	1.74563e-10	6.56891e-11	4.87024e-13	2.31005e-09	6.05734e-11		115.333	115.333		0.028294	0.000209774	0.00280041	0.0260905	3.7894	0.0182763	0.456719	2.15649
189	2022-03-07 12:06:29	6963021	7.24871e-11	2.22084e-10	2.15425e-09	5.79747e-12	1.43249e-10	4.69716e-11	4.44168e-13	2.14348e-09	4.97074e-11		115.983	115.983		0.0218042	0.000206182	0.00269118	0.0230741	3.80569	0.0184115	0.458504	2.17247
190	2022-03-07 12:07:07	7001266	5.67276e-11	2.19484e-10	2.0831e-09	5.23095e-12	1.29245e-10	3.67595e-11	4.38968e-13	2.07268e-09	4.4848e-11		116.617	116.617		0.0176465	0.000210728	0.00251114	0.0215295	3.81818	0.0185435	0.460151	2.18659
191	2022-03-07 12:07:45	7039511	3.90869e-11	2.13587e-10	2.06723e-09	4.92457e-12	1.2327e-10	2.53283e-11	4.27174e-13	2.05689e-09	4.27747e-11		117.25	117.25		0.0122523	0.000206641	0.00238221	0.0206918	3.82765	0.0186757	0.461701	2.19996
192	2022-03-07 12:08:23	7077756	5.76629e-11	2.36253e-10	1.99713e-09	4.99875e-12	1.20309e-10	3.73656e-11	4.72506e-13	1.98714e-09	4.17472e-11		117.883	117.883		0.0187096	0.000236593	0.00250297	0.0209036	3.83745	0.018816	0.463248	2.21313
193	2022-03-07 12:09:02	7116001	5.88561e-11	2.25411e-10	1.97611e-09	5.2245e-12	1.22996e-10	3.81388e-11	4.50822e-13	1.96623e-09	4.26796e-11		118.533	118.533		0.0192999	0.000228136	0.00264383	0.0215978	3.8498	0.0189671	0.464921	2.22695
194	2022-03-07 12:09:39	7153206	5.45454e-11	2.15091e-10	1.94332e-09	5.05895e-12	1.26956e-10	3.53454e-11	4.30182e-13	1.9336e-09	4.40537e-11		119.15	119.15		0.0181882	0.000221364	0.00260325	0.0226693	3.86136	0.0191057	0.466538	2.24059
195	2022-03-07 12:10:17	7191451	5.90066e-11	2.19842e-10	1.90359e-09	5.21805e-12	1.31559e-10	3.82363e-11	4.39684e-13	1.89407e-09	4.5651e-11		119.783	119.783		0.0200864	0.000230976	0.00274116	0.0239815	3.87348	0.0192489	0.468231	2.25537
196	2022-03-07 12:10:55	7229696	5.87809e-11	2.30694e-10	1.901e-09	5.46315e-12	1.32412e-10	3.809e-11	4.61388e-13	1.89149e-09	4.5947e-11		120.417	120.417		0.0200368	0.000242708	0.00287383	0.0241699	3.88619	0.0193989	0.470009	2.27061
197	2022-03-07 12:11:33	7267941	7.83351e-11	2.17405e-10	1.87332e-09	5.28255e-12	1.32815e-10	5.07611e-11	4.3481e-13	1.86395e-09	4.60868e-11		121.05	121.05		0.0270969	0.000232107	0.00281989	0.0246017	3.90111	0.0195493	0.471812	2.28606
198	2022-03-07 12:12:12	7306186	6.28121e-11	2.22688e-10	1.84771e-09	5.55667e-12	1.34461e-10	4.07022e-11	4.45376e-13	1.83847e-09	4.6658e-11		121.7	121.7		0.0220285	0.000241042	0.00300733	0.0252518	3.91708	0.019703	0.473706	2.30226
199	2022-03-07 12:12:50	7344431	8.44733e-11	2.09992e-10	1.85514e-09	5.62332e-12	1.28487e-10	5.47387e-11	4.19984e-13	1.84586e-09	4.4585e-11		122.333	122.333		0.0295065	0.000226389	0.00303121	0.0240332	3.9334	0.019851	0.475618	2.31787
200	2022-03-07 12:13:28	7382676	1.10187e-10	1.35644e-10	6.46611e-07	4.76117e-12	1.21691e-10	7.14012e-11	2.71288e-13	6.43378e-07	4.22268e-11		122.967	122.967		0.000110424	4.19554e-07	7.36327e-06	6.53048e-05	3.94278	0.0199229	0.47658	2.3255
201	2022-03-07 12:14:08	7422465	5.93399e-11	1.1655e-10	6.47417e-07	5.3707e-12	1.33991e-10	3.84523e-11	2.331e-13	6.4418e-07	4.64949e-11		123.633	123.633		5.93933e-05	3.60046e-07	8.29558e-06	7.1816e-05	3.94283	0.0199231	0.476585	2.32555
202	2022-03-07 12:14:44	7458111	3.8544e-10	1.83701e-10	6.68648e-07	1.02555e-11	1.66457e-10	2.49765e-10	3.67402e-13	6.65305e-07	5.77606e-11		124.233	124.233		0.000373538	5.4947e-07	1.53377e-05	8.63841e-05	3.94296	0.0199234	0.476592	2.32559
203	2022-03-07 12:15:19	7493756	1.26032e-10	1.31671e-10	6.70978e-07	7.53682e-12	1.44702e-10	8.16687e-11	2.63342e-13	6.67623e-07	5.02116e-11		124.817	124.817		0.000121716	3.92475e-07	1.12326e-05	7.48334e-05	3.94311	0.0199237	0.4766	2.32564
204	2022-03-07 12:15:55	7529401	7.67226e-11	9.99333e-11	6.73127e-07	1.04135e-11	2.21781e-10	4.97162e-11	1.99867e-13	6.69761e-07	7.6958e-11		125.417	125.417		7.38586e-05	2.96923e-07	1.54703e-05	0.000114329	3.94317	0.0199239	0.476608	2.3257
205	2022-03-07 12:16:37	7571928	2.29632e-08	6.20325e-10	6.48223e-07	4.37003e-10	6.87232e-10	1.48802e-08	1.24065e-12	6.44982e-07	2.3847e-10		126.117	126.117		0.0229553	1.91392e-06	0.000674155	0.000367882	3.95123	0.0199247	0.47685	2.32587
206	2022-03-07 12:17:08	7602413	2.5599e-08	4.87087e-10	6.40519e-07	3.44526e-10	6.22699e-10	1.65882e-08	9.74174e-13	6.37316e-07	2.16077e-10		126.633	126.633		0.025898	1.52091e-06	0.000537886	0.000337346	3.96385	0.0199255	0.477163	2.32605
207	2022-03-07 12:17:38	7632899	1.95253e-08	3.74406e-10	6.50194e-07	4.35541e-10	5.45323e-10	1.26524e-08	7.48812e-13	6.46943e-07	1.89227e-10		127.133	127.133		0.0194594	1.15167e-06	0.000669863	0.000291032	3.97519	0.0199262	0.477465	2.3262
208	2022-03-07 12:18:05	7659816	2.17472e-08	3.12578e-10	6.51807e-07	1.16388e-10	3.05334e-10	1.40922e-08	6.25156e-13	6.48548e-07	1.05951e-10		127.583	127.583		0.0216202	9.59112e-07	0.000178562	0.000162549	3.98443	0.0199267	0.477656	2.32631
209	2022-03-07 12:18:35	7689322	1.86246e-09	1.4963e-10	6.91044e-07	2.63256e-11	1.81555e-10	1.20687e-09	2.9926e-13	6.87589e-07	6.29996e-11		128.083	128.083		0.00174645	4.33055e-07	3.80954e-05	9.11658e-05	3.99027	0.019927	0.47771	2.32637
210	2022-03-07 12:19:11	7725877	7.66699e-10	1.31098e-10	6.92298e-07	1.70774e-11	1.48772e-10	4.96821e-10	2.62196e-13	6.88837e-07	5.16239e-11		128.683	128.683		0.00071764	3.78733e-07	2.46677e-05	7.45689e-05	3.99101	0.0199273	0.477729	2.32642
211	2022-03-07 12:19:47	7761525	5.28092e-10	1.2989e-10	6.91582e-07	1.35331e-11	1.29293e-10	3.42204e-10	2.5978e-13	6.88124e-07	4.48647e-11		129.283	129.283		0.000494813	3.75632e-07	1.95683e-05	6.48725e-05	3.99138	0.0199275	0.477742	2.32646
212	2022-03-07 12:20:23	7797171	5.32564e-10	1.92096e-10	1.93449e-08	1.88716e-11	2.60779e-10	3.45101e-10	3.84192e-13	1.92482e-08	9.04903e-11		129.883	129.883		0.0178394	1.98601e-05	0.000975534	0.00467773	3.99688	0.0199336	0.47804	2.32788
213	2022-03-07 12:20:59	7833836	3.6265e-10	2.11426e-10	6.48709e-09	1.66549e-11	2.27003e-10	2.34997e-10	4.22852e-13	6.45465e-09	7.877e-11		130.483	130.483		0.0362254	6.51836e-05	0.00256739	0.0121426	4.0131	0.0199591	0.479103	2.33293
214	2022-03-07 12:21:39	7873101	3.15952e-10	2.15757e-10	4.19768e-09	1.39019e-11	1.96174e-10	2.04737e-10	4.31514e-13	4.17669e-09	6.80724e-11		131.15	131.15		0.0487738	0.000102798	0.00331181	0.0162167	4.04143	0.0200151	0.481063	2.34238
215	2022-03-07 12:22:17	7911346	2.69394e-10	2.15214e-10	3.29822e-09	1.26495e-11	1.71674e-10	1.74567e-10	4.30428e-13	3.28173e-09	5.95709e-11		131.783	131.783		0.0529277	0.000130503	0.00383525	0.0180615	4.07363	0.020089	0.483326	2.35324
216	2022-03-07 12:22:55	7949591	2.30081e-10	1.99581e-10	2.85843e-09	1.16508e-11	1.55625e-10	1.49092e-10	3.99162e-13	2.84414e-09	5.40019e-11		132.417	132.417		0.0521589	0.000139644	0.00407594	0.0188921	4.10691	0.0201745	0.485831	2.36494
217	2022-03-07 12:23:33	7987836	2.01927e-10	1.99458e-10	2.61358e-09	1.06607e-11	1.4763e-10	1.30849e-10	3.98916e-13	2.60051e-09	5.12276e-11		133.05	133.05		0.0500649	0.000152632	0.00407896	0.0196006	4.13928	0.0202671	0.488414	2.37713
218	2022-03-07 12:24:12	8026081	1.70688e-10	2.02672e-10	2.46313e-09	9.73305e-12	1.39534e-10	1.10606e-10	4.05344e-13	2.45081e-09	4.84183e-11		133.7	133.7		0.0449046	0.000164565	0.0039515	0.0196572	4.17015	0.0203701	0.491024	2.38989
219	2022-03-07 12:24:50	8064326	1.77944e-10	2.08313e-10	2.33387e-09	9.34068e-12	1.33132e-10	1.15308e-10	4.16626e-13	2.3222e-09	4.61968e-11		134.333	134.333		0.0494062	0.000178513	0.00400223	0.0197941	4.20001	0.0204788	0.493542	2.40238
220	2022-03-07 12:25:28	8102571	1.5997e-10	2.07904e-10	2.24946e-09	8.7978e-12	1.29044e-10	1.03661e-10	4.15808e-13	2.23821e-09	4.47783e-11		134.967	134.967		0.0460824	0.000184848	0.00391107	0.0199062	4.23025	0.0205939	0.496048	2.41495
221	2022-03-07 12:26:06	8140816	1.43963e-10	2.05692e-10	2.18081e-09	8.16462e-12	1.25276e-10	9.3288e-11	4.11384e-13	2.16991e-09	4.34708e-11		135.6	135.6		0.0427768	0.000188638	0.00374385	0.0199333	4.25839	0.0207121	0.498472	2.42757
222	2022-03-07 12:26:45	8179061	1.44694e-10	2.12931e-10	2.11123e-09	7.81633e-12	1.1848e-10	9.37617e-11	4.25862e-13	2.10067e-09	4.11126e-11		136.25	136.25		0.0444109	0.000201713	0.00370226	0.0194733	4.28673	0.020839	0.500892	2.44038
223	2022-03-07 12:27:23	8217306	1.48027e-10	2.20026e-10	2.08393e-09	7.91092e-12	1.21754e-10	9.59215e-11	4.40052e-13	2.07351e-09	4.22486e-11		136.883	136.883		0.0460291	0.000211164	0.00379615	0.0202735	4.31536	0.0209697	0.503267	2.45296
224	2022-03-07 12:28:01	8255551	1.45726e-10	2.04004e-10	2.05184e-09	6.7682e-12	1.13187e-10	9.44304e-11	4.08008e-13	2.04158e-09	3.92759e-11		137.517	137.517		0.0460223	0.00019885	0.0032986	0.0191418	4.34451	0.0210996	0.505513	2.46544
225	2022-03-07 12:28:39	8293796	1.11326e-10	2.13955e-10	2.01149e-09	7.12725e-12	1.10096e-10	7.21392e-11	4.2791e-13	2.00143e-09	3.82033e-11		138.15	138.15		0.0358636	0.000212733	0.00354327	0.0189925	4.37044	0.0212299	0.50768	2.47752
226	2022-03-07 12:29:18	8332041	1.13573e-10	2.13259e-10	1.96737e-09	6.9359e-12	1.08047e-10	7.35953e-11	4.26518e-13	1.95753e-09	3.74923e-11		138.8	138.8		0.037408	0.000216796	0.00352547	0.0190571	4.39426	0.0213695	0.509977	2.48989
227	2022-03-07 12:29:56	8370286	1.12133e-10	2.03666e-10	1.95108e-09	6.57147e-12	1.08911e-10	7.26622e-11	4.07332e-13	1.94132e-09	3.77921e-11		139.433	139.433		0.037242	0.000208773	0.00336812	0.0193698	4.4179	0.0215043	0.51216	2.50205
228	2022-03-07 12:30:34	8408531	8.93001e-11	2.16412e-10	1.91918e-09	6.50052e-12	1.07519e-10	5.78665e-11	4.32824e-13	1.90958e-09	3.73091e-11		140.067	140.067		0.0301517	0.000225525	0.00338713	0.0194401	4.43924	0.0216418	0.5143	2.51434
229	2022-03-07 12:31:12	8446776	1.05543e-10	2.20149e-10	1.90328e-09	6.4973e-12	1.04716e-10	6.83919e-11	4.40298e-13	1.89376e-09	3.63365e-11		140.7	140.7		0.0359337	0.000231336	0.00341374	0.0190915	4.46017	0.0217865	0.516453	2.52655
230	2022-03-07 12:31:51	8485021	9.67713e-11	2.16986e-10	1.85365e-09	6.35862e-12	1.0559e-10	6.27078e-11	4.33972e-13	1.84438e-09	3.66397e-11		141.35	141.35		0.0338294	0.000234118	0.00343032	0.0197663	4.48284	0.0219377	0.518677	2.53917
231	2022-03-07 12:32:29	8523266	9.45353e-11	2.03522e-10	1.86972e-09	5.88562e-12	9.93464e-11	6.12589e-11	4.07044e-13	1.86037e-09	3.44732e-11		141.983	141.983		0.0327637	0.000217703	0.00314786	0.0184376	4.50393	0.0220808	0.520761	2.55127
232	2022-03-07 12:33:07	8561511	1.15014e-10	2.10341e-10	1.86188e-09	6.09417e-12	1.02854e-10	7.45291e-11	4.20682e-13	1.85257e-09	3.56903e-11		142.617	142.617		0.0400289	0.000225945	0.00327313	0.019169	4.52698	0.0222213	0.522794	2.56318
233	2022-03-07 12:33:45	8599756	9.60403e-11	2.29067e-10	1.86367e-09	6.15115e-12	1.02336e-10	6.22341e-11	4.58134e-13	1.85435e-09	3.55106e-11		143.25	143.25		0.0333933	0.000245824	0.00330056	0.0190541	4.55023	0.0223707	0.524876	2.57529
234	2022-03-07 12:34:24	8638001	8.87841e-11	2.19176e-10	1.85873e-09	5.96517e-12	1.03037e-10	5.75321e-11	4.38352e-13	1.84944e-09	3.57538e-11		143.9	143.9		0.0309524	0.000235834	0.00320927	0.0192356	4.57114	0.0225272	0.526991	2.58773
235	2022-03-07 12:35:02	8676246	1.02952e-10	2.1805e-10	1.71641e-07	4.4118e-12	1.09626e-10	6.67129e-11	4.361e-13	1.70783e-07	3.80402e-11		144.533	144.533		0.000388677	2.54077e-06	2.57036e-05	0.000221627	4.58106	0.0226027	0.528016	2.59389
236	2022-03-07 12:35:42	8716035	8.09796e-11	9.75476e-11	6.60855e-07	4.11187e-12	9.4245e-11	5.24748e-11	1.95095e-13	6.57551e-07	3.2703e-11		145.2	145.2		7.94044e-05	2.95216e-07	6.22205e-06	4.94859e-05	4.58122	0.0226037	0.528026	2.59398
237	2022-03-07 12:36:17	8751681	7.36373e-11	7.8352e-11	6.65872e-07	3.81625e-12	8.87064e-11	4.7717e-11	1.56704e-13	6.62543e-07	3.07811e-11		145.783	145.783		7.16609e-05	2.35337e-07	5.73121e-06	4.62268e-05	4.58126	0.0226038	0.52803	2.59401
238	2022-03-07 12:36:53	8787326	3.61091e-11	8.0932e-11	6.69276e-07	3.37335e-12	8.16564e-11	2.33987e-11	1.61864e-13	6.6593e-07	2.83348e-11		146.383	146.383		3.49612e-05	2.41849e-07	5.0403e-06	4.23365e-05	4.5813	0.022604	0.528033	2.59404
239	2022-03-07 12:37:35	8829853	2.0736e-08	2.04136e-10	6.49657e-07	4.22216e-10	2.38841e-10	1.34369e-08	4.08272e-13	6.46409e-07	8.28778e-11		147.083	147.083		0.0206831	6.28442e-07	0.000649906	0.000127572	4.58855	0.0226043	0.528262	2.5941
240	2022-03-07 12:38:02	8856769	2.26731e-08	1.6257e-10	6.50105e-07	4.28565e-10	2.27713e-10	1.46922e-08	3.2514e-13	6.46854e-07	7.90164e-11		147.533	147.533		0.0225997	5.00135e-07	0.000659224	0.000121544	4.59829	0.0226045	0.528557	2.59415
241	2022-03-07 12:38:29	8883686	2.4041e-08	1.52219e-10	6.4679e-07	4.33846e-10	2.17207e-10	1.55786e-08	3.04438e-13	6.43556e-07	7.53708e-11		147.983	147.983		0.024086	4.70691e-07	0.000670768	0.000116531	4.60879	0.0226047	0.528856	2.59421
242	2022-03-07 12:38:56	8910601	2.52691e-08	1.63e-10	6.45626e-07	4.26175e-10	2.03737e-10	1.63744e-08	3.26e-13	6.42398e-07	7.06967e-11		148.433	148.433		0.025362	5.04936e-07	0.000660096	0.000109501	4.61992	0.022605	0.529155	2.59426
243	2022-03-07 12:39:20	8934266	1.31834e-08	1.02493e-10	6.80832e-07	3.87613e-11	1.31553e-10	8.54284e-09	2.04986e-13	6.77428e-07	4.56489e-11		148.833	148.833		0.0125477	3.01082e-07	5.69323e-05	6.70487e-05	4.6275	0.0226051	0.529299	2.59429
244	2022-03-07 12:39:49	8963772	1.15811e-09	8.96036e-11	6.84953e-07	2.0483e-11	1.13288e-10	7.50455e-10	1.79207e-13	6.81528e-07	3.93109e-11		149.317	149.317		0.00109563	2.61634e-07	2.99042e-05	5.73922e-05	4.6308	0.0226053	0.52932	2.59432
245	2022-03-07 12:40:26	9000327	6.72174e-10	9.30846e-11	6.88178e-07	1.50532e-11	1.0405e-10	4.35569e-10	1.86169e-13	6.84737e-07	3.61053e-11		149.933	149.933		0.00063293	2.70525e-07	2.1874e-05	5.24651e-05	4.63133	0.0226054	0.529336	2.59436
246	2022-03-07 12:41:01	9035975	4.87995e-10	9.41595e-11	6.87551e-07	1.7702e-11	2.01332e-10	3.16221e-10	1.88319e-13	6.84113e-07	6.98622e-11		150.517	150.517		0.000459923	2.73898e-07	2.57465e-05	0.00010161	4.63165	0.0226056	0.52935	2.5944
247	2022-03-07 12:41:37	9071621	4.45533e-10	2.16904e-10	9.92183e-09	1.70538e-11	1.95246e-10	2.88705e-10	4.33808e-13	9.87222e-09	6.77504e-11		151.117	151.117		0.029098	4.37226e-05	0.00171882	0.00682841	4.64051	0.0226188	0.529873	2.59648
248	2022-03-07 12:42:14	9108286	3.64273e-10	2.25401e-10	5.12497e-09	1.47694e-11	1.77394e-10	2.36049e-10	4.50802e-13	5.09935e-09	6.15557e-11		151.733	151.733		0.0460586	8.79619e-05	0.00288185	0.0120109	4.66369	0.0226594	0.531292	2.60229
249	2022-03-07 12:42:53	9147551	2.89099e-10	2.02898e-10	3.63537e-09	1.31859e-11	1.61686e-10	1.87336e-10	4.05796e-13	3.61719e-09	5.6105e-11		152.383	152.383		0.0515315	0.000111624	0.00362711	0.0154331	4.6954	0.0227242	0.533407	2.61121
250	2022-03-07 12:43:31	9185796	2.50893e-10	2.11621e-10	3.01346e-09	1.18174e-11	1.49924e-10	1.62579e-10	4.23242e-13	2.99839e-09	5.20236e-11		153.017	153.017		0.0539508	0.000140451	0.00392154	0.0172638	4.72881	0.0228041	0.535797	2.62156
251	2022-03-07 12:44:10	9224041	2.15268e-10	1.9914e-10	2.65638e-09	1.03619e-11	1.39947e-10	1.39494e-10	3.9828e-13	2.6431e-09	4.85616e-11		153.667	153.667		0.0525127	0.000149933	0.00390076	0.0182811	4.76341	0.0228984	0.53834	2.63311
252	2022-03-07 12:44:48	9262286	1.82835e-10	2.19238e-10	2.47738e-09	9.58578e-12	1.34941e-10	1.18477e-10	4.38476e-13	2.46499e-09	4.68245e-11		154.3	154.3		0.0478235	0.000176992	0.00386932	0.0189008	4.79518	0.023002	0.5408	2.64489
253	2022-03-07 12:45:26	9300531	1.75762e-10	2.09942e-10	2.33448e-09	8.98163e-12	1.30363e-10	1.13894e-10	4.19884e-13	2.32281e-09	4.5236e-11		154.933	154.933		0.0487876	0.000179862	0.00384738	0.0193773	4.82577	0.023115	0.543244	2.65701
254	2022-03-07 12:46:04	9338776	1.65205e-10	2.10074e-10	2.24721e-09	8.3248e-12	1.28026e-10	1.07053e-10	4.20148e-13	2.23597e-09	4.4425e-11		155.567	155.567		0.0476381	0.000186964	0.0037045	0.019769	4.85631	0.0232311	0.545635	2.66941
255	2022-03-07 12:46:43	9377021	1.38717e-10	2.26138e-10	2.15885e-09	8.04423e-12	1.21902e-10	8.98886e-11	4.52276e-13	2.14806e-09	4.23e-11		156.217	156.217		0.0416373	0.000209499	0.00372616	0.0195938	4.88532	0.02336	0.54805	2.6822
256	2022-03-07 12:47:21	9415266	1.25355e-10	2.1721e-10	2.08155e-09	7.56692e-12	1.19124e-10	8.123e-11	4.3442e-13	2.07114e-09	4.1336e-11		156.85	156.85		0.0390238	0.0002087	0.00363523	0.0198583	4.91087	0.0234924	0.550381	2.69469
257	2022-03-07 12:47:59	9453511	1.16411e-10	2.0902e-10	2.05203e-09	7.18422e-12	1.15587e-10	7.54343e-11	4.1804e-13	2.04177e-09	4.01087e-11		157.483	157.483		0.0367608	0.00020372	0.00350103	0.0195459	4.93487	0.023623	0.552641	2.70717
258	2022-03-07 12:48:37	9491756	1.16981e-10	2.1201e-10	2.03593e-09	6.66715e-12	1.15461e-10	7.58037e-11	4.2402e-13	2.02575e-09	4.0065e-11		158.117	158.117		0.037233	0.000208268	0.00327474	0.019679	4.9583	0.0237535	0.554787	2.71959
259	2022-03-07 12:49:16	9530001	1.16981e-10	2.2921e-10	1.97448e-09	6.5661e-12	1.11959e-10	7.58037e-11	4.5842e-13	1.96461e-09	3.88498e-11		158.767	158.767		0.0383917	0.000232173	0.00332548	0.019676	4.98287	0.0238966	0.556932	2.73238
260	2022-03-07 12:49:54	9568246	1.15164e-10	2.18777e-10	1.98618e-09	6.40807e-12	1.10187e-10	7.46263e-11	4.37554e-13	1.97625e-09	3.82349e-11		159.4	159.4		0.0375728	0.000220299	0.00322633	0.0192505	5.00693	0.0240399	0.559007	2.74471
261	2022-03-07 12:50:32	9606491	1.13863e-10	2.0644e-10	1.92834e-09	6.39517e-12	1.08489e-10	7.37832e-11	4.1288e-13	1.9187e-09	3.76457e-11		160.033	160.033		0.0382626	0.000214112	0.00331641	0.0195223	5.03094	0.0241775	0.561079	2.75699
262	2022-03-07 12:51:10	9644736	1.02683e-10	2.08007e-10	1.90675e-09	6.063e-12	1.08536e-10	6.65386e-11	4.16014e-13	1.89722e-09	3.7662e-11		160.667	160.667		0.0348963	0.00021818	0.00317976	0.0197519	5.05411	0.0243144	0.563136	2.76942
263	2022-03-07 12:51:48	9682981	9.55136e-11	2.11385e-10	1.91166e-09	5.9942e-12	1.08259e-10	6.18928e-11	4.2277e-13	1.9021e-09	3.75659e-11		161.3	161.3		0.0323765	0.000221153	0.0031356	0.0196509	5.07541	0.0244535	0.565136	2.7819
264	2022-03-07 12:52:27	9721226	9.98028e-11	2.0643e-10	1.8723e-09	5.79962e-12	1.06751e-10	6.46722e-11	4.1286e-13	1.86294e-09	3.70426e-11		161.95	161.95		0.0345416	0.00022051	0.00309759	0.0197845	5.09716	0.024597	0.567161	2.79472
265	2022-03-07 12:53:05	9759471	9.06331e-11	2.13996e-10	1.88437e-09	5.7577e-12	1.07111e-10	5.87302e-11	4.27992e-13	1.87495e-09	3.71675e-11		162.583	162.583		0.031167	0.000227127	0.0030555	0.0197241	5.11797	0.0247388	0.56911	2.80723
266	2022-03-07 12:53:43	9797716	1.06231e-10	2.13423e-10	1.85313e-09	5.47175e-12	1.04136e-10	6.88377e-11	4.26846e-13	1.84386e-09	3.61352e-11		163.217	163.217		0.0371467	0.000230338	0.00295271	0.0194995	5.1396	0.0248836	0.571012	2.81965
267	2022-03-07 12:54:21	9835961	9.02246e-11	1.98608e-10	1.84791e-09	5.32125e-12	1.03824e-10	5.84655e-11	3.97216e-13	1.83867e-09	3.60269e-11		163.85	163.85		0.0316387	0.000214954	0.0028796	0.019496	5.16139	0.0250247	0.572859	2.832
268	2022-03-07 12:55:00	9874206	8.95043e-11	2.15389e-10	1.83242e-09	5.4223e-12	1.02274e-10	5.79988e-11	4.30778e-13	1.82326e-09	3.54891e-11		164.5	164.5		0.0316515	0.000235087	0.00295909	0.0193673	5.18195	0.0251709	0.574757	2.84463
269	2022-03-07 12:55:38	9912451	7.64753e-11	2.06379e-10	1.81382e-09	5.47605e-12	1.03003e-10	4.9556e-11	4.12758e-13	1.80475e-09	3.5742e-11		165.133	165.133		0.0273213	0.000227563	0.00301907	0.0197054	5.20063	0.0253174	0.57665	2.857
270	2022-03-07 12:56:16	9950696	2.82445e-10	1.19816e-10	6.45088e-07	3.70015e-12	9.63564e-11	1.83024e-10	2.39632e-13	6.41863e-07	3.34357e-11		165.767	165.767		0.00028372	3.71472e-07	5.73588e-06	5.18312e-05	5.20937	0.0253896	0.577608	2.86326
271	2022-03-07 12:56:56	9990485	5.59966e-11	8.82625e-11	6.60765e-07	3.6249e-12	9.34286e-11	3.62858e-11	1.76525e-13	6.57461e-07	3.24197e-11		166.433	166.433		5.49148e-05	2.67152e-07	5.48591e-06	4.90639e-05	5.20948	0.0253898	0.577612	2.86329
272	2022-03-07 12:57:32	10026131	6.06191e-11	8.66653e-11	6.67573e-07	3.20995e-12	8.70271e-11	3.92812e-11	1.73331e-13	6.64235e-07	3.01984e-11		167.033	167.033		5.88418e-05	2.59643e-07	4.80839e-06	4.52361e-05	5.20952	0.02539	0.577615	2.86332
273	2022-03-07 12:58:07	10061776	3.20134e-11	2.05468e-10	6.24932e-07	4.15671e-10	2.8512e-10	2.07447e-11	4.10936e-13	6.21807e-07	9.89366e-11		167.617	167.617		3.31951e-05	6.57569e-07	0.000665146	0.000158316	5.20955	0.0253902	0.57781	2.86338
274	2022-03-07 12:58:50	10104303	2.37394e-08	1.78961e-10	6.46432e-07	4.22975e-10	2.44016e-10	1.53831e-08	3.57922e-13	6.432e-07	8.46736e-11		168.333	168.333		0.023797	5.53689e-07	0.000654322	0.000130986	5.21808	0.0253907	0.578283	2.86348
275	2022-03-07 12:59:17	10131219	2.50541e-08	1.63748e-10	6.43386e-07	3.99886e-10	2.31427e-10	1.62351e-08	3.27496e-13	6.40169e-07	8.03052e-11		168.783	168.783		0.0252338	5.09019e-07	0.000621534	0.000124816	5.22912	0.0253909	0.57857	2.86354
276	2022-03-07 12:59:44	10158136	2.5894e-08	1.66614e-10	6.40968e-07	3.19664e-10	2.15552e-10	1.67793e-08	3.33228e-13	6.37763e-07	7.47965e-11		169.233	169.233		0.0261781	5.19882e-07	0.000498721	0.000116693	5.24068	0.0253911	0.578822	2.86359
277	2022-03-07 13:00:11	10185051	2.6283e-08	1.48093e-10	6.59422e-07	6.96181e-11	1.58308e-10	1.70314e-08	2.96186e-13	6.56125e-07	5.49329e-11		169.683	169.683		0.0258277	4.4916e-07	0.000105574	8.33046e-05	5.25239	0.0253914	0.578958	2.86364
278	2022-03-07 13:00:40	10214557	1.55786e-09	1.04602e-10	6.88267e-07	2.38241e-11	1.24321e-10	1.00949e-09	2.09204e-13	6.84826e-07	4.31394e-11		170.167	170.167		0.00146672	3.03958e-07	3.46146e-05	6.26783e-05	5.25898	0.0253915	0.578992	2.86367
279	2022-03-07 13:01:17	10251112	7.32869e-10	9.40981e-11	6.91313e-07	1.56681e-11	1.10317e-10	4.74899e-10	1.88196e-13	6.87856e-07	3.828e-11		170.783	170.783		0.000686952	2.7223e-07	2.26643e-05	5.53729e-05	5.25965	0.0253917	0.579009	2.86371
280	2022-03-07 13:01:52	10286760	5.09817e-10	8.25803e-11	6.8773e-07	1.27656e-11	1.02192e-10	3.30361e-10	1.65161e-13	6.84291e-07	3.54606e-11		171.367	171.367		0.000480365	2.40153e-07	1.85619e-05	5.15618e-05	5.25999	0.0253919	0.579021	2.86374
281	2022-03-07 13:02:28	10322406	4.9523e-10	1.87264e-10	1.4064e-08	1.7e-11	2.10129e-10	3.20909e-10	3.74528e-13	1.39937e-08	7.29148e-11		171.967	171.967		0.0228178	2.66303e-05	0.00120876	0.0051845	5.26698	0.0253999	0.57939	2.86531
282	2022-03-07 13:03:05	10359071	3.6652e-10	2.16443e-10	5.90638e-09	1.47909e-11	1.86282e-10	2.37505e-10	4.32886e-13	5.87685e-09	6.46399e-11		172.583	172.583		0.0402116	7.32913e-05	0.00250422	0.0109441	5.28641	0.0254307	0.580535	2.87029
283	2022-03-07 13:03:44	10398336	3.03321e-10	1.82595e-10	3.90901e-09	1.32429e-11	1.63712e-10	1.96552e-10	3.6519e-13	3.88946e-09	5.68081e-11		173.233	173.233		0.0502818	9.34226e-05	0.00338779	0.0145326	5.31582	0.0254849	0.582449	2.87857
284	2022-03-07 13:04:22	10436581	2.51936e-10	2.04608e-10	3.12745e-09	1.12832e-11	1.56331e-10	1.63255e-10	4.09216e-13	3.11181e-09	5.42469e-11		173.867	173.867		0.0522005	0.000130847	0.0036078	0.0173454	5.34827	0.0255559	0.584665	2.88866
285	2022-03-07 13:05:00	10474826	2.17536e-10	2.03963e-10	2.73415e-09	1.0048e-11	1.47995e-10	1.40963e-10	4.07926e-13	2.72048e-09	5.13543e-11		174.5	174.5		0.0515565	0.000149197	0.003675	0.0187825	5.38113	0.0256446	0.586971	2.9001
286	2022-03-07 13:05:39	10513071	2.02379e-10	2.10576e-10	2.53603e-09	9.66855e-12	1.37259e-10	1.31142e-10	4.21152e-13	2.52335e-09	4.76289e-11		175.15	175.15		0.0517114	0.000166067	0.00381247	0.0187809	5.41469	0.0257471	0.589404	2.91231
287	2022-03-07 13:06:17	10551316	1.85136e-10	2.11785e-10	2.38366e-09	8.81715e-12	1.29782e-10	1.19968e-10	4.2357e-13	2.37174e-09	4.50344e-11		175.783	175.783		0.0503294	0.000177697	0.003699	0.0188929	5.447	0.0258559	0.591783	2.92424
288	2022-03-07 13:06:55	10589561	1.55348e-10	2.00185e-10	2.26512e-09	8.18397e-12	1.26361e-10	1.00666e-10	4.0037e-13	2.25379e-09	4.38473e-11		176.417	176.417		0.0444416	0.000176754	0.00361304	0.0193576	5.47701	0.0259682	0.594098	2.93635
289	2022-03-07 13:07:33	10627806	1.36976e-10	2.17282e-10	2.20588e-09	7.8346e-12	1.23539e-10	8.87604e-11	4.34564e-13	2.19485e-09	4.2868e-11		177.05	177.05		0.0402381	0.000197003	0.00355169	0.0194335	5.50383	0.0260865	0.596367	2.94864
290	2022-03-07 13:08:12	10666051	1.43415e-10	2.04567e-10	2.11673e-09	7.2885e-12	1.22881e-10	9.29329e-11	4.09134e-13	2.10615e-09	4.26397e-11		177.7	177.7		0.043904	0.000193286	0.00344328	0.0201441	5.53118	0.0262134	0.598641	2.9615
291	2022-03-07 13:08:50	10704296	1.18368e-10	2.15675e-10	2.07416e-09	7.0864e-12	1.18346e-10	7.67025e-11	4.3135e-13	2.06379e-09	4.10661e-11		178.333	178.333		0.03698	0.000207964	0.00341652	0.0197989	5.55679	0.0263404	0.600813	2.97415
292	2022-03-07 13:09:28	10742541	1.23302e-10	2.07955e-10	2.02093e-09	6.92192e-12	1.13734e-10	7.98997e-11	4.1591e-13	2.01083e-09	3.94657e-11		178.967	178.967		0.0395361	0.000205801	0.00342512	0.0195285	5.58102	0.0264715	0.602979	2.9866
293	2022-03-07 13:10:06	10780786	1.24882e-10	2.11969e-10	1.99959e-09	6.4242e-12	1.14679e-10	8.09235e-11	4.23938e-13	1.98959e-09	3.97936e-11		179.6	179.6		0.0404701	0.000212012	0.00321276	0.0199009	5.60635	0.0266038	0.605081	2.99909
294	2022-03-07 13:10:45	10819031	1.09714e-10	2.22985e-10	1.96398e-09	6.15437e-12	1.0941e-10	7.10947e-11	4.4597e-13	1.95416e-09	3.79653e-11		180.25	180.25		0.0361993	0.000227075	0.00313362	0.0193308	5.63127	0.0267465	0.607144	3.01184
295	2022-03-07 13:11:23	10857276	9.60726e-11	2.13464e-10	1.94533e-09	6.25112e-12	1.08796e-10	6.2255e-11	4.26928e-13	1.9356e-09	3.77522e-11		180.883	180.883		0.0320023	0.000219463	0.0032134	0.0194066	5.65287	0.0268879	0.609154	3.0241
296	2022-03-07 13:12:01	10895521	1.06252e-10	2.1376e-10	1.90886e-09	5.8781e-12	1.05993e-10	6.88513e-11	4.2752e-13	1.89932e-09	3.67796e-11		181.517	181.517		0.0360693	0.000223966	0.00307938	0.0192678	5.67443	0.0270283	0.611147	3.03635
297	2022-03-07 13:12:39	10933766	1.11197e-10	2.01853e-10	1.92462e-09	5.74802e-12	1.06482e-10	7.20557e-11	4.03706e-13	1.915e-09	3.69493e-11		182.15	182.15		0.0374389	0.000209759	0.00298657	0.0191982	5.6977	0.0271657	0.613067	3.04853
298	2022-03-07 13:13:18	10972011	1.04995e-10	1.91492e-10	1.89692e-09	5.71577e-12	1.03214e-10	6.80368e-11	3.82984e-13	1.88744e-09	3.58153e-11		182.8	182.8		0.035867	0.000201898	0.00301318	0.0188807	5.72153	0.0272994	0.615017	3.06091
299	2022-03-07 13:13:56	11010256	1.06876e-10	2.16965e-10	1.84024e-09	5.39972e-12	1.04059e-10	6.92556e-11	4.3393e-13	1.83104e-09	3.61085e-11		183.433	183.433		0.037634	0.000235801	0.00293425	0.0196216	5.7448	0.027438	0.616901	3.0731
300	2022-03-07 13:14:34	11048501	9.49868e-11	2.16668e-10	1.85638e-09	5.42875e-12	1.01016e-10	6.15514e-11	4.33336e-13	1.8471e-09	3.50526e-11		184.067	184.067		0.0331567	0.000233431	0.00292437	0.0188822	5.76722	0.0275866	0.618756	3.08529
301	2022-03-07 13:15:12	11086746	9.30626e-11	2.03276e-10	1.85097e-09	5.23202e-12	9.8775e-11	6.03046e-11	4.06552e-13	1.84172e-09	3.42749e-11		184.7	184.7		0.03258	0.000219643	0.00282664	0.0185173	5.78804	0.0277301	0.620577	3.09714
302	2022-03-07 13:15:50	11124991	8.70211e-11	2.05642e-10	1.84503e-09	5.24385e-12	9.95621e-11	5.63897e-11	4.11284e-13	1.8358e-09	3.4548e-11		185.333	185.333		0.030563	0.000222915	0.00284215	0.0187249	5.80803	0.0278703	0.622372	3.10893
303	2022-03-07 13:16:29	11163236	6.94018e-11	2.02713e-10	1.83615e-09	5.35995e-12	9.88471e-11	4.49724e-11	4.05426e-13	1.82697e-09	3.42999e-11		185.983	185.983		0.0244928	0.000220802	0.00291912	0.0186804	5.82592	0.0280145	0.624245	3.12109
304	2022-03-07 13:17:07	11201481	8.24523e-11	2.05733e-10	5.78259e-07	3.5475e-12	9.64236e-11	5.34291e-11	4.11466e-13	5.75368e-07	3.3459e-11		186.617	186.617		9.23965e-05	7.1156e-07	6.13479e-06	5.78616e-05	5.83371	0.0280846	0.625171	3.12702
305	2022-03-07 13:17:47	11241270	7.28848e-11	9.26443e-11	6.59869e-07	3.47225e-12	9.05979e-11	4.72294e-11	1.85289e-13	6.5657e-07	3.14375e-11		187.283	187.283		7.15738e-05	2.80796e-07	5.26203e-06	4.7642e-05	5.83376	0.0280849	0.625175	3.12705
306	2022-03-07 13:18:22	11276916	4.31719e-11	9.49581e-11	6.60765e-07	3.34862e-12	8.47957e-11	2.79754e-11	1.89916e-13	6.57461e-07	2.94241e-11		187.867	187.867		4.23379e-05	2.87419e-07	5.06779e-06	4.45304e-05	5.8338	0.0280851	0.625178	3.12708
307	2022-03-07 13:18:58	11312561	4.69236e-11	9.30436e-11	6.62915e-07	4.60049e-10	3.10329e-10	3.04065e-11	1.86087e-13	6.596e-07	1.07684e-10		188.467	188.467		4.58679e-05	2.8071e-07	0.000693979	0.00016244	5.83382	0.0280853	0.625388	3.12714
308	2022-03-07 13:19:41	11355088	2.44225e-08	1.76207e-10	6.35503e-07	3.05511e-10	2.20893e-10	1.58258e-08	3.52414e-13	6.32325e-07	7.66499e-11		189.183	189.183		0.0249028	5.54543e-07	0.000480739	0.000120613	5.84276	0.0280856	0.625808	3.12725
309	2022-03-07 13:20:08	11382004	2.54371e-08	1.66378e-10	6.38101e-07	3.17301e-10	2.10436e-10	1.64832e-08	3.32756e-13	6.3491e-07	7.30213e-11		189.633	189.633		0.0258317	5.21479e-07	0.000497258	0.000114435	5.85418	0.0280858	0.626029	3.1273
310	2022-03-07 13:20:34	11408921	2.61446e-08	1.58444e-10	6.44998e-07	3.55582e-10	2.03271e-10	1.69417e-08	3.16888e-13	6.41773e-07	7.0535e-11		190.067	190.067		0.0262663	4.91301e-07	0.000551292	0.000109357	5.86547	0.028086	0.626256	3.12735
311	2022-03-07 13:21:01	11435836	2.52712e-08	1.56182e-10	6.42311e-07	2.62247e-10	1.88211e-10	1.63757e-08	3.12364e-13	6.39099e-07	6.53092e-11		190.517	190.517		0.025495	4.86313e-07	0.000408287	0.000101678	5.87711	0.0280863	0.626472	3.12739
312	2022-03-07 13:21:31	11465341	2.62368e-09	9.4692e-11	6.90238e-07	2.71437e-11	1.2326e-10	1.70014e-09	1.89384e-13	6.86787e-07	4.27712e-11		191.017	191.017		0.00246313	2.74375e-07	3.93251e-05	6.19659e-05	5.8841	0.0280864	0.626584	3.12743
313	2022-03-07 13:22:00	11494356	9.413e-10	8.45563e-11	6.90148e-07	1.79793e-11	1.10889e-10	6.09962e-10	1.69113e-13	6.86697e-07	3.84785e-11		191.5	191.5		0.000883814	2.45038e-07	2.60514e-05	5.5754e-05	5.88491	0.0280866	0.626599	3.12746
314	2022-03-07 13:22:36	11530912	6.06073e-10	9.28081e-11	6.92477e-07	1.39223e-11	1.01496e-10	3.92735e-10	1.85616e-13	6.89015e-07	3.52191e-11		192.1	192.1		0.000567146	2.68047e-07	2.01051e-05	5.08596e-05	5.88535	0.0280867	0.626613	3.1275
315	2022-03-07 13:23:12	11566560	4.21377e-10	1.56049e-10	8.9045e-08	1.74913e-11	2.22645e-10	2.73052e-10	3.12098e-13	8.85998e-08	7.72578e-11		192.7	192.7		0.00306645	3.50495e-06	0.000196432	0.000867627	5.88644	0.0280879	0.626678	3.12777
316	2022-03-07 13:23:48	11602206	3.97803e-10	1.97943e-10	8.10952e-09	1.51553e-11	1.94412e-10	2.57776e-10	3.95886e-13	8.06897e-09	6.7461e-11		193.3	193.3		0.0317869	4.88174e-05	0.00186883	0.00831874	5.89689	0.0281036	0.627298	3.13053
317	2022-03-07 13:24:24	11638871	3.25971e-10	1.98444e-10	4.63366e-09	1.34826e-11	1.7535e-10	2.11229e-10	3.96888e-13	4.61049e-09	6.08464e-11		193.9	193.9		0.0455858	8.56532e-05	0.00290971	0.0131314	5.92011	0.0281439	0.628731	3.13696
318	2022-03-07 13:25:04	11678136	2.74479e-10	2.15562e-10	3.45841e-09	1.19851e-11	1.61326e-10	1.77862e-10	4.31124e-13	3.44112e-09	5.59801e-11		194.567	194.567		0.0514289	0.00012466	0.00346549	0.0161867	5.95244	0.028214	0.630856	3.14673
319	2022-03-07 13:25:42	11716381	2.58107e-10	2.10464e-10	2.85514e-09	1.05683e-11	1.48643e-10	1.67253e-10	4.20928e-13	2.84086e-09	5.15791e-11		195.2	195.2		0.0585797	0.000147428	0.0037015	0.0180654	5.98728	0.0283002	0.633126	3.15758
320	2022-03-07 13:26:20	11754626	2.15547e-10	2.12102e-10	2.59173e-09	9.53633e-12	1.41146e-10	1.39674e-10	4.24204e-13	2.57877e-09	4.89777e-11		195.833	195.833		0.0538924	0.000163676	0.00367952	0.0188977	6.0229	0.0283987	0.635463	3.16929
321	2022-03-07 13:26:58	11792871	1.92983e-10	2.0212e-10	2.42327e-09	8.89778e-12	1.35859e-10	1.25053e-10	4.0424e-13	2.41115e-09	4.71431e-11		196.467	196.467		0.0516051	0.000166816	0.00367181	0.0194543	6.0563	0.0285033	0.637791	3.18143
322	2022-03-07 13:27:36	11830076	1.47715e-10	2.12757e-10	2.28868e-09	8.2001e-12	1.28487e-10	9.57193e-11	4.25514e-13	2.27724e-09	4.4585e-11		197.1	197.1		0.0418229	0.000185921	0.00358289	0.0194807	6.08589	0.028615	0.640088	3.19376
323	2022-03-07 13:28:14	11868321	1.61529e-10	2.12276e-10	2.23763e-09	7.46157e-12	1.21849e-10	1.04671e-10	4.24552e-13	2.22644e-09	4.22816e-11		197.733	197.733		0.0467775	0.000189733	0.00333459	0.0188957	6.11395	0.028734	0.642279	3.20591
324	2022-03-07 13:28:52	11906566	1.28215e-10	1.85196e-10	2.13064e-09	7.21755e-12	1.19574e-10	8.30833e-11	3.70392e-13	2.11999e-09	4.14922e-11		198.367	198.367		0.0389945	0.000173841	0.0033875	0.019474	6.14111	0.0288491	0.644408	3.21806
325	2022-03-07 13:29:30	11944811	1.17916e-10	2.0855e-10	2.06845e-09	7.08425e-12	1.16206e-10	7.64096e-11	4.171e-13	2.05811e-09	4.03235e-11		199	199		0.0369405	0.000201649	0.00342491	0.0194945	6.16515	0.028968	0.646565	3.2304
326	2022-03-07 13:30:09	11983056	1.16605e-10	2.11211e-10	2.03565e-09	6.56072e-12	1.11848e-10	7.556e-11	4.22422e-13	2.02547e-09	3.88113e-11		199.65	199.65		0.0371184	0.000207512	0.00322291	0.0190658	6.18922	0.029101	0.648725	3.24294
327	2022-03-07 13:30:47	12021301	1.06521e-10	2.18111e-10	2.01649e-09	6.62415e-12	1.05893e-10	6.90256e-11	4.36222e-13	2.00641e-09	3.67449e-11		200.283	200.283		0.0342306	0.000216327	0.00328499	0.0182222	6.21182	0.0292352	0.650786	3.25474
328	2022-03-07 13:31:25	12059546	9.6868e-11	2.0384e-10	1.97274e-09	5.9899e-12	1.06449e-10	6.27705e-11	4.0768e-13	1.96288e-09	3.69378e-11		200.917	200.917		0.0318189	0.000206657	0.00303634	0.0187241	6.23273	0.0293692	0.652788	3.26644
329	2022-03-07 13:32:03	12097791	9.19553e-11	2.04587e-10	1.95121e-09	6.08772e-12	1.06074e-10	5.9587e-11	4.09174e-13	1.94145e-09	3.68077e-11		201.55	201.55		0.0305385	0.000209703	0.00311997	0.018864	6.25248	0.029501	0.654738	3.27835
330	2022-03-07 13:32:42	12136036	1.11004e-10	1.99171e-10	1.91916e-09	5.83725e-12	1.01539e-10	7.19306e-11	3.98342e-13	1.90956e-09	3.5234e-11		202.2	202.2		0.0374802	0.000207561	0.00304157	0.0183591	6.27458	0.0296366	0.65674	3.29044
331	2022-03-07 13:33:20	12174281	9.05686e-11	2.02161e-10	1.9081e-09	5.71577e-12	9.92793e-11	5.86885e-11	4.04322e-13	1.89856e-09	3.44499e-11		202.833	202.833		0.0307575	0.000211898	0.00299553	0.0180546	6.29619	0.0297694	0.658652	3.30197
332	2022-03-07 13:33:58	12212526	9.03321e-11	1.96601e-10	1.90288e-09	5.57495e-12	1.02528e-10	5.85352e-11	3.93202e-13	1.89337e-09	3.55772e-11		203.467	203.467		0.0307614	0.000206635	0.00292974	0.0186965	6.31567	0.029902	0.660528	3.31361
333	2022-03-07 13:34:36	12250771	8.23233e-11	1.94738e-10	1.85296e-09	5.42337e-12	9.75707e-11	5.33455e-11	3.89476e-13	1.8437e-09	3.3857e-11		204.1	204.1		0.0287893	0.000210191	0.00292687	0.0182719	6.33453	0.030034	0.662383	3.32532
334	2022-03-07 13:35:15	12289016	8.74511e-11	2.05724e-10	1.87068e-09	5.27932e-12	9.95521e-11	5.66683e-11	4.11448e-13	1.86133e-09	3.45446e-11		204.75	204.75		0.0302929	0.000219946	0.00282214	0.0184663	6.35373	0.0301738	0.664251	3.33726
335	2022-03-07 13:35:53	12327261	8.30973e-11	1.98362e-10	1.85323e-09	5.29007e-12	1.00359e-10	5.38471e-11	3.96724e-13	1.84396e-09	3.48246e-11		205.383	205.383		0.0290558	0.000214072	0.00285451	0.0187913	6.37253	0.0303112	0.666049	3.34906
336	2022-03-07 13:36:31	12365506	8.22158e-11	1.99816e-10	1.82819e-09	5.10625e-12	9.97207e-11	5.32758e-11	3.99632e-13	1.81905e-09	3.46031e-11		206.017	206.017		0.0291413	0.000218594	0.00279306	0.0189275	6.39096	0.0304482	0.667837	3.361
337	2022-03-07 13:37:09	12403751	7.34438e-11	1.94871e-10	1.82434e-09	5.2761e-12	9.81129e-11	4.75916e-11	3.89742e-13	1.81522e-09	3.40452e-11		206.65	206.65		0.026087	0.000213635	0.00289206	0.0186616	6.40845	0.0305851	0.669637	3.3729
338	2022-03-07 13:37:47	12441996	8.50646e-11	2.03317e-10	1.82866e-09	5.57065e-12	1.02591e-10	5.51219e-11	4.06634e-13	1.81952e-09	3.55991e-11		207.283	207.283		0.0301433	0.000222367	0.0030463	0.0194673	6.42625	0.0307232	0.671518	3.38498
339	2022-03-07 13:38:26	12480241	4.06671e-11	9.722e-11	6.58794e-07	3.59265e-12	9.13036e-11	2.63523e-11	1.9444e-13	6.555e-07	3.16823e-11		207.933	207.933		4.00008e-05	2.95145e-07	5.45337e-06	4.80914e-05	6.43606	0.0307955	0.67251	3.39132
340	2022-03-07 13:39:06	12520030	5.19009e-11	8.39625e-11	6.62288e-07	3.28627e-12	8.63793e-11	3.36318e-11	1.67925e-13	6.58977e-07	2.99736e-11		208.6	208.6		5.07812e-05	2.53553e-07	4.962e-06	4.52577e-05	6.43609	0.0307957	0.672513	3.39135
341	2022-03-07 13:39:41	12555676	3.84634e-11	7.36015e-11	6.6193e-07	2.89175e-12	8.05536e-11	2.49243e-11	1.47203e-13	6.5862e-07	2.79521e-11		209.183	209.183		3.7654e-05	2.22385e-07	4.36866e-06	4.22282e-05	6.43612	0.0307958	0.672516	3.39138
342	2022-03-07 13:40:24	12598203	2.57193e-08	1.71866e-10	6.44282e-07	4.09158e-10	2.12773e-10	1.66661e-08	3.43732e-13	6.41061e-07	7.38322e-11		209.9	209.9		0.0258677	5.33512e-07	0.00063506	0.000114596	6.4454	0.0307961	0.672745	3.39143
343	2022-03-07 13:40:51	12625119	2.349e-08	1.47684e-10	6.44282e-07	4.2238e-10	1.99302e-10	1.52215e-08	2.95368e-13	6.41061e-07	6.91578e-11		210.35	210.35		0.0236256	4.58445e-07	0.000655582	0.000107341	6.45654	0.0307963	0.673035	3.39148
344	2022-03-07 13:41:18	12652036	2.47497e-08	1.47367e-10	6.41594e-07	4.1995e-10	1.86129e-10	1.60378e-08	2.94734e-13	6.38386e-07	6.45868e-11		210.8	210.8		0.0249968	4.59378e-07	0.000654542	0.000100666	6.46748	0.0307965	0.67333	3.39153
345	2022-03-07 13:41:44	12678951	2.5337e-08	1.41838e-10	6.39982e-07	4.22619e-10	1.79151e-10	1.64184e-08	2.83676e-13	6.36782e-07	6.21654e-11		211.233	211.233		0.0256544	4.43256e-07	0.000660361	9.71362e-05	6.47845	0.0307967	0.673615	3.39157
346	2022-03-07 13:42:11	12705866	2.54418e-08	1.37528e-10	6.65423e-07	6.18523e-11	1.34059e-10	1.64863e-08	2.75056e-13	6.62096e-07	4.65185e-11		211.683	211.683		0.0247756	4.13355e-07	9.29519e-05	6.99081e-05	6.4898	0.0307969	0.673785	3.39161
347	2022-03-07 13:42:41	12735372	1.47904e-09	9.43541e-11	6.88984e-07	2.19289e-11	1.12827e-10	9.58418e-10	1.88708e-13	6.85539e-07	3.9151e-11		212.183	212.183		0.00139106	2.73893e-07	3.18279e-05	5.68242e-05	6.49634	0.0307971	0.673816	3.39164
348	2022-03-07 13:43:17	12771927	7.34352e-10	7.99184e-11	6.93284e-07	1.57218e-11	1.02054e-10	4.7586e-10	1.59837e-13	6.89818e-07	3.54127e-11		212.783	212.783		0.000686386	2.3055e-07	2.26773e-05	5.10797e-05	6.49696	0.0307973	0.673832	3.39167
349	2022-03-07 13:43:53	12807575	5.1071e-10	8.70134e-11	7.03228e-07	1.23969e-11	9.72929e-11	3.3094e-10	1.74027e-13	6.99712e-07	3.37606e-11		213.383	213.383		0.000470601	2.47469e-07	1.76286e-05	4.80081e-05	6.49731	0.0307974	0.673844	3.3917
350	2022-03-07 13:44:29	12843221	4.93897e-10	1.8667e-10	1.37801e-08	1.62206e-11	1.96418e-10	3.20045e-10	3.7334e-13	1.37112e-08	6.8157e-11		213.983	213.983		0.0232252	2.70927e-05	0.0011771	0.00494605	6.50442	0.0308056	0.674203	3.3932
351	2022-03-07 13:45:05	12879886	3.5978e-10	2.04218e-10	5.85016e-09	1.44157e-11	1.75676e-10	2.33137e-10	4.08436e-13	5.82091e-09	6.09596e-11		214.583	214.583		0.0398515	6.98162e-05	0.00246415	0.0104202	6.52334	0.0308347	0.675295	3.39781
352	2022-03-07 13:45:45	12919151	2.9657e-10	2.08263e-10	3.89988e-09	1.21528e-11	1.60449e-10	1.92177e-10	4.16526e-13	3.88038e-09	5.56758e-11		215.25	215.25		0.0492778	0.000106805	0.0031162	0.0142763	6.55305	0.0308936	0.677155	3.40604
353	2022-03-07 13:46:23	12957396	2.58472e-10	2.05918e-10	3.10229e-09	1.06177e-11	1.47534e-10	1.6749e-10	4.11836e-13	3.08678e-09	5.11943e-11		215.883	215.883		0.0539891	0.000132752	0.00342254	0.0165021	6.58575	0.0309694	0.679226	3.41579
354	2022-03-07 13:47:01	12995641	1.95617e-10	2.0473e-10	2.71224e-09	9.847e-12	1.38421e-10	1.2676e-10	4.0946e-13	2.69868e-09	4.80321e-11		216.517	216.517		0.0467362	0.000150967	0.00363058	0.0177094	6.61765	0.0310593	0.681459	3.42663
355	2022-03-07 13:47:39	13033886	1.99627e-10	2.1591e-10	2.49148e-09	9.159e-12	1.32998e-10	1.29358e-10	4.3182e-13	2.47902e-09	4.61503e-11		217.15	217.15		0.0519203	0.000173319	0.00367613	0.0185232	6.64889	0.0311619	0.683773	3.4381
356	2022-03-07 13:48:18	13072131	1.58014e-10	2.1119e-10	2.34801e-09	7.99585e-12	1.26696e-10	1.02393e-10	4.2238e-13	2.33627e-09	4.39635e-11		217.8	217.8		0.0436084	0.000179889	0.00340537	0.0187237	6.67994	0.0312767	0.686075	3.4502
357	2022-03-07 13:48:56	13110376	1.60174e-10	1.59252e-10	3.47851e-07	2.76275e-12	7.30371e-11	1.03793e-10	3.18504e-13	3.46112e-07	2.53439e-11		218.433	218.433		0.000298383	9.15633e-07	7.94234e-06	7.28584e-05	6.69384	0.031334	0.687155	3.45616

## Sheet: Data processing with Joe's meth
					CO (ć )		CO2 (ć )		Ethylene (ć )		EO (ć )
Cycle	Start Index	Start Time, min	End Index	End Time, min	Start	End	Start	End	Start	End	Start	End		Conversion, %	Selectivity, %	Yield
1	32	19.75	36	21.75	0.00430808	0.00431025	0.405485	0.406091	0.739742	0.776345	0.145749	0.146645		3.17667	74.6822	4.25359
2	66	40.8167	70	42.7667	0.00782954	0.00783097	0.803578	0.804061	1.47791	1.51939	0.245469	0.24634		2.61637	78.2441	3.34385
3	100	61.7667	104	63.5	0.0111471	0.0111483	1.18717	1.18756	2.23807	2.27832	0.322498	0.323428		2.72157	82.6321	3.2936
4	135	83.0167	139	84.85	0.0138162	0.0138172	1.51868	1.51897	2.94556	2.98054	0.383104	0.38396		2.76938	85.8163	3.22711
5	169	103.85	173	105.867	0.0171802	0.0171831	1.95141	1.95206	3.49828	3.53953	0.434926	0.435783		2.79031	72.3696	3.85564
6	205	126.117	209	128.083	0.0199247	0.019927	2.32587	2.32637	3.95123	3.99027	0.47685	0.47771		2.77324	77.2312	3.59083
7	239	147.083	244	149.317	0.0226043	0.0226053	2.5941	2.59432	4.58855	4.6308	0.528262	0.52932		2.69713	90.3145	2.98638
8	274	168.333	278	170.167	0.0253907	0.0253915	2.86348	2.86367	5.21808	5.25898	0.578283	0.578992		1.93152	88.017	2.19448
9	308	189.183	312	191.017	0.0280856	0.0280864	3.12725	3.12743	5.84276	5.8841	0.625808	0.626584		2.06201	89.0483	2.31562
10	342	209.9	347	212.183	0.0307961	0.0307971	3.39143	3.39164	6.4454	6.49634	0.672745	0.673816		2.25596	91.0753	2.47703
Ethylene in	5.4	vol%	54000
Reduction Time	2	min
Cycles	10
Carbon balance	8.44883e-06
	8
