# Supplementary material for: Mechano-synthesis of a AgSrFeO3 catalyst for epoxidation of ethylene in a chemical looping set-up
Source: Royal Society of Chemistry journal article supplement (doi:10.1039/d4ma00485j), 2024-01-01
Supplement: d4ma00485j2.xlsx [file d4ma00485j2.xlsx]

## Sheet: Raw data
Index	Time	ms	Ethylene mbar	Carbon monoxide mbar	Argon mbar	Ethylene oxide mbar	Carbon dioxide mbar	Corrected Et	Corrected CO	Corrected Ar	Corrected CO2	Et (ć)	CO (ć)	EtO (ć)	CO2 (ć)
1	2022-03-09 11:58:55	15189	5.72114e-11	5.84901e-11	5.32357e-09	1.35976e-11	1.44837e-09	3.7073e-11	1.1698e-13	5.29695e-09	5.02584e-10	0.00699893	2.20844e-05	0.00256706	0.0948818
2	2022-03-09 11:59:47	67767	3.78829e-11	4.67675e-11	6.45741e-09	9.18803e-12	1.57135e-09	2.45481e-11	9.3535e-14	6.42512e-09	5.45258e-10	0.00382065	1.45577e-05	0.00143002	0.0848635
3	2022-03-09 12:00:28	108864	4.01296e-11	5.22756e-11	3.07717e-07	6.6994e-12	1.22857e-09	2.6004e-11	1.04551e-13	3.06178e-07	4.26314e-10	8.49308e-05	3.41471e-07	2.18807e-05	0.00139237
4	2022-03-09 12:01:11	151502	1.78557e-11	3.81163e-11	4.12082e-07	5.29115e-12	1.00157e-09	1.15705e-11	7.62326e-14	4.10022e-07	3.47545e-10	2.82192e-05	1.85923e-07	1.29046e-05	0.000847626
5	2022-03-09 12:01:49	189999	2.03282e-11	3.38061e-11	4.23997e-07	5.86552e-11	3.34354e-09	1.31727e-11	6.76122e-14	4.21877e-07	1.16021e-09	3.1224e-05	1.60265e-07	0.000139034	0.00275011
6	2022-03-09 12:02:33	233828	9.79406e-09	6.8595e-11	4.01601e-07	3.33931e-10	1.54094e-08	6.34655e-09	1.3719e-13	3.99593e-07	5.34706e-09	0.0158825	3.43324e-07	0.000835678	0.0133813
7	2022-03-09 12:03:07	267275	1.32607e-08	5.47737e-11	3.97033e-07	3.99516e-10	1.09865e-08	8.59293e-09	1.09547e-13	3.95048e-07	3.81232e-09	0.0217516	2.77302e-07	0.00101131	0.00965026
8	2022-03-09 12:03:37	297003	1.43667e-08	6.0251e-11	3.85476e-07	3.96414e-10	7.42979e-09	9.30962e-09	1.20502e-13	3.83549e-07	2.57814e-09	0.0242723	3.14177e-07	0.00103354	0.0067218
9	2022-03-09 12:04:06	326730	1.47214e-08	6.2657e-11	3.81176e-07	3.77056e-10	5.67351e-09	9.53947e-09	1.25314e-13	3.7927e-07	1.96871e-09	0.0251522	3.30408e-07	0.000994162	0.00519078
10	2022-03-09 12:04:35	355867	8.17299e-09	4.97775e-11	3.47134e-07	1.71249e-10	3.14989e-09	5.2961e-09	9.9555e-14	3.45398e-07	1.09301e-09	0.0153333	2.88232e-07	0.000495801	0.0031645
11	2022-03-09 12:05:07	387734	2.93131e-09	3.53828e-11	3.58063e-07	8.57581e-11	2.28894e-09	1.89949e-09	7.07656e-14	3.56273e-07	7.94262e-10	0.00533156	1.98628e-07	0.000240709	0.00222937
12	2022-03-09 12:05:39	419602	1.17829e-09	2.59126e-11	3.84849e-07	4.7028e-11	1.87981e-09	7.63532e-10	5.18252e-14	3.82925e-07	6.52294e-10	0.00199395	1.3534e-07	0.000122813	0.00170345
13	2022-03-09 12:06:19	459010	4.07832e-10	3.67444e-11	3.01537e-07	2.56978e-11	2.31689e-09	2.64275e-10	7.34888e-14	3.00029e-07	8.03961e-10	0.000880831	2.44939e-07	8.5651e-05	0.00267961
14	2022-03-09 12:06:57	497507	1.30827e-10	3.87715e-11	6.61376e-08	1.92468e-11	2.59656e-09	8.47759e-11	7.7543e-14	6.58069e-08	9.01006e-10	0.00128825	1.17834e-06	0.000292474	0.0136917
15	2022-03-09 12:07:37	537024	7.76901e-11	2.3353e-11	1.82189e-08	1.71462e-11	2.34449e-09	5.03432e-11	4.6706e-14	1.81278e-08	8.13538e-10	0.00277713	2.57648e-06	0.000945851	0.0448779
16	2022-03-09 12:08:16	576022	3.30024e-11	4.31432e-11	8.65817e-09	1.50478e-11	2.11629e-09	2.13856e-11	8.62864e-14	8.61488e-09	7.34353e-10	0.0024824	1.0016e-05	0.00174672	0.0852424
17	2022-03-09 12:08:55	615019	4.73644e-11	4.64091e-11	6.53502e-09	1.36815e-11	1.91209e-09	3.06921e-11	9.28182e-14	6.50234e-09	6.63495e-10	0.00472016	1.42746e-05	0.00210409	0.102039
18	2022-03-09 12:09:37	657137	2.29512e-11	4.95215e-11	6.02053e-09	1.26796e-11	1.75911e-09	1.48724e-11	9.9043e-14	5.99043e-09	6.10411e-10	0.00248269	1.65335e-05	0.00211664	0.101898
19	2022-03-09 12:10:18	698234	2.71437e-11	3.85872e-11	5.89089e-09	1.18658e-11	1.63469e-09	1.75891e-11	7.71744e-14	5.86144e-09	5.67237e-10	0.00300082	1.31665e-05	0.00202438	0.0967745
20	2022-03-09 12:10:59	739332	2.50474e-11	3.54544e-11	5.74876e-09	1.10875e-11	1.57147e-09	1.62307e-11	7.09088e-14	5.72002e-09	5.453e-10	0.00283753	1.23966e-05	0.00193837	0.0953319
21	2022-03-09 12:11:40	780429	2.51227e-11	3.57923e-11	5.69654e-09	1.06747e-11	1.49409e-09	1.62795e-11	7.15846e-14	5.66806e-09	5.18449e-10	0.00287215	1.26295e-05	0.00188331	0.0914686
22	2022-03-09 12:12:21	821527	4.82029e-11	5.10572e-11	6.24088e-09	1.07543e-11	1.56847e-09	3.12355e-11	1.02114e-13	6.20968e-09	5.44259e-10	0.00503013	1.64444e-05	0.00173186	0.0876469
23	2022-03-09 12:13:02	862624	1.75439e-11	5.06375e-11	6.25709e-09	1.00587e-11	1.50572e-09	1.13684e-11	1.01275e-13	6.2258e-09	5.22485e-10	0.00182602	1.6267e-05	0.00161565	0.0839225
24	2022-03-09 12:13:43	903722	2.03174e-11	2.75199e-11	6.19641e-09	9.7094e-12	1.46769e-09	1.31657e-11	5.50398e-14	6.16543e-09	5.09288e-10	0.0021354	8.92717e-06	0.00157481	0.0826039
25	2022-03-09 12:14:24	944819	2.69824e-11	4.82725e-11	6.17011e-09	9.41915e-12	1.41706e-09	1.74846e-11	9.6545e-14	6.13926e-09	4.9172e-10	0.002848	1.57258e-05	0.00153425	0.0800943
26	2022-03-09 12:15:05	985917	3.04009e-11	4.55082e-11	6.13946e-09	8.98378e-12	1.38442e-09	1.96998e-11	9.10164e-14	6.10876e-09	4.80394e-10	0.00322484	1.48993e-05	0.00147064	0.0786401
27	2022-03-09 12:15:47	1027014	2.30049e-11	4.92451e-11	6.11673e-09	8.8107e-12	1.36703e-09	1.49072e-11	9.84902e-14	6.08615e-09	4.74359e-10	0.00244936	1.61827e-05	0.00144766	0.0779408
28	2022-03-09 12:16:28	1068112	1.78879e-11	4.62966e-11	6.04875e-09	8.32695e-12	1.33295e-09	1.15914e-11	9.25932e-14	6.01851e-09	4.62534e-10	0.00192595	1.53847e-05	0.00138356	0.0768519
29	2022-03-09 12:17:09	1109209	3.60984e-11	4.39315e-11	6.06898e-09	8.36135e-12	1.30464e-09	2.33918e-11	8.7863e-14	6.03864e-09	4.5271e-10	0.00387368	1.45501e-05	0.00138464	0.0749689
30	2022-03-09 12:17:50	1150307	1.76299e-11	4.29077e-11	6.07707e-09	8.20547e-12	1.30308e-09	1.14242e-11	8.58154e-14	6.04668e-09	4.52169e-10	0.00188933	1.41921e-05	0.00135702	0.0747796
31	2022-03-09 12:18:31	1191404	1.17819e-11	3.74713e-11	6.0737e-09	7.89695e-12	1.2846e-09	7.63467e-12	7.49426e-14	6.04333e-09	4.45756e-10	0.00126332	1.24009e-05	0.00130672	0.07376
32	2022-03-09 12:19:12	1232502	2.54344e-11	5.1733e-11	6.58888e-09	7.99155e-12	1.27741e-09	1.64815e-11	1.03466e-13	6.55594e-09	4.43261e-10	0.00251398	1.5782e-05	0.00121898	0.0676122
33	2022-03-09 12:19:53	1273599	2.80574e-11	5.07091e-11	5.59148e-09	7.4992e-12	1.24525e-09	1.81812e-11	1.01418e-13	5.56352e-09	4.32102e-10	0.00326793	1.82291e-05	0.00134792	0.0776669
34	2022-03-09 12:20:34	1314697	1.58132e-11	4.3952e-11	6.0014e-09	7.21647e-12	1.23913e-09	1.0247e-11	8.7904e-14	5.97139e-09	4.29978e-10	0.00171601	1.47209e-05	0.00120851	0.0720063
35	2022-03-09 12:21:15	1355794	2.92937e-11	4.58666e-11	2.05773e-07	6.71552e-12	1.21069e-09	1.89823e-11	9.17332e-14	2.04744e-07	4.20109e-10	9.27124e-05	4.48038e-07	3.27996e-05	0.00205188
36	2022-03-09 12:21:58	1398434	1.11369e-11	4.05837e-11	3.5242e-07	6.20167e-12	1.04332e-09	7.21671e-12	8.11674e-14	3.50658e-07	3.62032e-10	2.05805e-05	2.31472e-07	1.76858e-05	0.00103244
37	2022-03-09 12:22:36	1436932	2.46174e-11	2.78169e-11	3.92016e-07	5.52765e-12	9.59579e-10	1.59521e-11	5.56338e-14	3.90056e-07	3.32974e-10	4.08969e-05	1.4263e-07	1.41714e-05	0.000853657
38	2022-03-09 12:23:15	1475429	3.04938e-09	4.38701e-11	3.65141e-07	2.26807e-10	6.59974e-09	1.976e-09	8.77402e-14	3.63315e-07	2.29011e-09	0.0054388	2.41499e-07	0.00062427	0.00630337
39	2022-03-09 12:24:00	1520809	1.17671e-08	5.39137e-11	3.76876e-07	3.36108e-10	5.24531e-09	7.62508e-09	1.07827e-13	3.74992e-07	1.82012e-09	0.020334	2.87546e-07	0.000896308	0.00485377
40	2022-03-09 12:24:30	1550575	1.33205e-08	4.36347e-11	3.69709e-07	3.32327e-10	3.81433e-09	8.63168e-09	8.72694e-14	3.6786e-07	1.32357e-09	0.0234646	2.37235e-07	0.000903405	0.00359803
41	2022-03-09 12:25:00	1580342	1.38633e-08	3.48606e-11	3.68634e-07	3.23237e-10	2.97196e-09	8.98342e-09	6.97212e-14	3.66791e-07	1.03127e-09	0.0244919	1.90084e-07	0.000881257	0.0028116
42	2022-03-09 12:25:30	1610109	1.05793e-08	3.29358e-11	3.32263e-07	1.70865e-10	2.10393e-09	6.85539e-09	6.58716e-14	3.30602e-07	7.30064e-10	0.0207361	1.99248e-07	0.00051683	0.00220829
43	2022-03-09 12:26:02	1642466	3.60814e-09	3.58639e-11	3.36026e-07	7.92168e-11	1.68281e-09	2.33807e-09	7.17278e-14	3.34346e-07	5.83935e-10	0.00699298	2.14532e-07	0.000236931	0.0017465
44	2022-03-09 12:26:34	1674332	1.44273e-09	3.84337e-11	3.6747e-07	4.08779e-11	1.48136e-09	9.34889e-10	7.68674e-14	3.65633e-07	5.14032e-10	0.00255691	2.10231e-07	0.0001118	0.00140587
45	2022-03-09 12:27:13	1713740	5.1086e-10	2.10802e-11	3.60662e-07	2.09485e-11	1.68917e-09	3.31037e-10	4.21604e-14	3.58859e-07	5.86142e-10	0.000922473	1.17485e-07	5.83753e-05	0.00163335
46	2022-03-09 12:27:52	1752237	1.95681e-10	3.1912e-11	9.80933e-08	1.68947e-11	2.43555e-09	1.26801e-10	6.3824e-14	9.76028e-08	8.45136e-10	0.00129916	6.53915e-07	0.000173096	0.00865893
47	2022-03-09 12:28:30	1790734	8.30006e-11	5.26749e-11	2.52221e-08	1.56735e-11	2.28989e-09	5.37844e-11	1.0535e-13	2.5096e-08	7.94592e-10	0.00214315	4.19787e-06	0.000624542	0.0316621
48	2022-03-09 12:29:10	1830252	4.53326e-11	3.77375e-11	1.05769e-08	1.37084e-11	2.07958e-09	2.93755e-11	7.5475e-14	1.0524e-08	7.21614e-10	0.00279128	7.17169e-06	0.00130258	0.0685683
49	2022-03-09 12:29:49	1869249	3.26907e-11	4.8508e-11	7.28335e-09	1.23076e-11	1.88497e-09	2.11836e-11	9.7016e-14	7.24693e-09	6.54085e-10	0.00292311	1.33872e-05	0.00169832	0.0902567
50	2022-03-09 12:30:31	1911367	3.37656e-11	3.8751e-11	6.59267e-09	1.12337e-11	1.74616e-09	2.18801e-11	7.7502e-14	6.55971e-09	6.05918e-10	0.00333553	1.18149e-05	0.00171253	0.0923696
51	2022-03-09 12:31:12	1952464	2.52839e-11	4.60815e-11	6.34779e-09	1.03167e-11	1.66014e-09	1.6384e-11	9.2163e-14	6.31605e-09	5.76069e-10	0.00259402	1.45919e-05	0.00163341	0.0912071
52	2022-03-09 12:31:53	1993562	4.36556e-11	3.1523e-11	6.24417e-09	9.53955e-12	1.54447e-09	2.82888e-11	6.3046e-14	6.21295e-09	5.35931e-10	0.0045532	1.01475e-05	0.00153543	0.0862603
53	2022-03-09 12:32:34	2034659	3.86784e-11	4.42591e-11	6.17608e-09	8.93325e-12	1.47033e-09	2.50636e-11	8.85182e-14	6.1452e-09	5.10205e-10	0.00407857	1.44044e-05	0.0014537	0.0830249
54	2022-03-09 12:33:15	2075757	2.35424e-11	3.48709e-11	6.14317e-09	8.68278e-12	1.41238e-09	1.52555e-11	6.97418e-14	6.11245e-09	4.90096e-10	0.0024958	1.14098e-05	0.00142051	0.0801799
55	2022-03-09 12:33:56	2116854	5.27931e-11	4.73715e-11	6.11904e-09	7.9593e-12	1.37039e-09	3.42099e-11	9.4743e-14	6.08844e-09	4.75525e-10	0.00561883	1.55611e-05	0.00130728	0.0781029
56	2022-03-09 12:34:37	2157952	2.32522e-11	4.00513e-11	6.09105e-09	7.81847e-12	1.34111e-09	1.50674e-11	8.01026e-14	6.06059e-09	4.65365e-10	0.00248613	1.3217e-05	0.00129005	0.0767854
57	2022-03-09 12:35:19	2199049	3.15189e-11	5.17637e-11	6.03951e-09	7.2455e-12	1.29372e-09	2.04242e-11	1.03527e-13	6.00931e-09	4.48921e-10	0.00339877	1.72278e-05	0.00120571	0.0747042
58	2022-03-09 12:36:00	2240147	2.86594e-11	3.42566e-11	6.01822e-09	7.04662e-12	1.29372e-09	1.85713e-11	6.85132e-14	5.98813e-09	4.48921e-10	0.00310135	1.14415e-05	0.00117676	0.0749685
59	2022-03-09 12:36:41	2281244	3.00032e-11	2.6967e-11	6.03593e-09	6.44032e-12	1.27069e-09	1.94421e-11	5.3934e-14	6.00575e-09	4.40929e-10	0.00323724	8.98039e-06	0.00107236	0.0734179
60	2022-03-09 12:37:22	2322342	3.34217e-11	4.06758e-11	5.80618e-09	6.75637e-12	1.22665e-09	2.16573e-11	8.13516e-14	5.77715e-09	4.25648e-10	0.00374878	1.40816e-05	0.0011695	0.0736778
61	2022-03-09 12:38:03	2363439	1.76729e-11	3.35706e-11	6.0402e-09	6.21887e-12	1.24393e-09	1.1452e-11	6.71412e-14	6.01e-09	4.31644e-10	0.0019055	1.11716e-05	0.00103475	0.0718209
62	2022-03-09 12:38:44	2404537	4.24301e-11	4.63887e-11	6.05303e-09	6.1877e-12	1.21454e-09	2.74947e-11	9.27774e-14	6.02276e-09	4.21445e-10	0.00456513	1.54045e-05	0.00102739	0.0699754
63	2022-03-09 12:39:25	2445634	1.71032e-11	3.33453e-11	5.321e-09	6.22532e-12	1.19474e-09	1.10829e-11	6.66906e-14	5.2944e-09	4.14575e-10	0.00209332	1.25965e-05	0.00117583	0.0783045
64	2022-03-09 12:40:06	2486732	1.35772e-11	4.66856e-11	7.06073e-09	6.02215e-12	1.1795e-09	8.79803e-12	9.33712e-14	7.02543e-09	4.09286e-10	0.00125231	1.32905e-05	0.000857194	0.0582579
65	2022-03-09 12:40:47	2527829	1.29107e-11	3.35809e-11	5.47863e-09	5.85337e-12	1.16931e-09	8.36613e-12	6.71618e-14	5.45124e-09	4.05751e-10	0.00153472	1.23205e-05	0.00107377	0.0744328
66	2022-03-09 12:41:28	2568927	2.06399e-11	3.77068e-11	5.93371e-09	5.977e-12	1.14963e-09	1.33747e-11	7.54136e-14	5.90404e-09	3.98922e-10	0.00226534	1.27732e-05	0.00101236	0.0675675
67	2022-03-09 12:42:10	2610024	1.59314e-11	4.04813e-11	1.69402e-07	5.36102e-12	1.19006e-09	1.03235e-11	8.09626e-14	1.68555e-07	4.12951e-10	6.12474e-05	4.80333e-07	3.18058e-05	0.00244995
68	2022-03-09 12:42:52	2652662	1.09004e-11	2.95983e-11	3.42655e-07	5.2202e-12	1.01045e-09	7.06346e-12	5.91966e-14	3.40942e-07	3.50626e-10	2.07175e-05	1.73627e-07	1.53111e-05	0.0010284
69	2022-03-09 12:43:31	2691159	1.69849e-12	1.42718e-11	3.9757e-07	4.50855e-12	9.16629e-10	1.10062e-12	2.85436e-14	3.95582e-07	3.1807e-10	2.78228e-06	7.21559e-08	1.13973e-05	0.000804056
70	2022-03-09 12:44:09	2729657	7.34825e-10	4.55082e-11	3.92105e-07	1.67589e-10	5.07458e-09	4.76167e-10	9.10164e-14	3.90144e-07	1.76088e-09	0.00122049	2.33289e-07	0.000429556	0.0045134
71	2022-03-09 12:44:55	2775036	1.08016e-08	4.4638e-11	3.69709e-07	3.0948e-10	4.94476e-09	6.99944e-09	8.9276e-14	3.6786e-07	1.71583e-09	0.0190274	2.4269e-07	0.000841297	0.00466435
72	2022-03-09 12:45:24	2804802	1.26076e-08	2.63016e-11	3.62812e-07	3.14431e-10	3.57462e-09	8.16972e-09	5.26032e-14	3.60998e-07	1.24039e-09	0.0226309	1.45716e-07	0.000871005	0.00343601
73	2022-03-09 12:45:54	2834569	1.32352e-08	3.37651e-11	3.60483e-07	3.05665e-10	2.77436e-09	8.57641e-09	6.75302e-14	3.58681e-07	9.62703e-10	0.023911	1.88274e-07	0.000852193	0.00268401
74	2022-03-09 12:46:24	2864335	1.37149e-08	3.81982e-11	3.60572e-07	1.99154e-10	2.07321e-09	8.88726e-09	7.63964e-14	3.58769e-07	7.19404e-10	0.0247715	2.1294e-07	0.000555103	0.0020052
75	2022-03-09 12:46:56	2896692	4.50484e-09	3.95496e-11	3.82162e-07	8.71599e-11	1.63482e-09	2.91914e-09	7.90992e-14	3.80251e-07	5.67283e-10	0.00767686	2.08018e-07	0.000229217	0.00149186
76	2022-03-09 12:47:28	2928559	1.43469e-09	3.9652e-11	3.86999e-07	3.99728e-11	1.35419e-09	9.29679e-10	7.9304e-14	3.85064e-07	4.69904e-10	0.00241435	2.0595e-07	0.000103808	0.00122033
77	2022-03-09 12:48:07	2967966	5.50517e-10	2.63937e-11	3.19991e-07	1.81051e-11	2.01035e-09	3.56735e-10	5.27874e-14	3.18391e-07	6.97591e-10	0.00112043	1.65794e-07	5.68644e-05	0.00219099
78	2022-03-09 12:48:46	3006464	1.56605e-10	2.70183e-11	6.75753e-08	1.76224e-11	2.64083e-09	1.0148e-10	5.40366e-14	6.72374e-08	9.16368e-10	0.00150928	8.03669e-07	0.000262092	0.0136288
79	2022-03-09 12:49:25	3045982	7.46693e-11	3.45534e-11	1.46927e-08	1.61035e-11	2.35109e-09	4.83857e-11	6.91068e-14	1.46192e-08	8.15828e-10	0.00330973	4.72711e-06	0.00110153	0.0558051
80	2022-03-09 12:50:04	3084979	6.04901e-11	3.0704e-11	6.93029e-09	1.4248e-11	2.05366e-09	3.91976e-11	6.1408e-14	6.89564e-09	7.1262e-10	0.0056844	8.90534e-06	0.00206623	0.103344
81	2022-03-09 12:50:47	3127097	3.72916e-11	3.46149e-11	5.80705e-09	1.22958e-11	1.85917e-09	2.4165e-11	6.92298e-14	5.77801e-09	6.45132e-10	0.00418222	1.19816e-05	0.00212803	0.111653
82	2022-03-09 12:51:28	3168194	3.30777e-11	3.35604e-11	5.50918e-09	1.11466e-11	1.71616e-09	2.14343e-11	6.71208e-14	5.48163e-09	5.95508e-10	0.00391021	1.22447e-05	0.00203344	0.108637
83	2022-03-09 12:52:09	3209292	3.94631e-11	3.68366e-11	5.39457e-09	1.03458e-11	1.59534e-09	2.55721e-11	7.36732e-14	5.3676e-09	5.53583e-10	0.00476416	1.37255e-05	0.00192745	0.103134
84	2022-03-09 12:52:50	3250389	2.40584e-11	4.7648e-11	5.30609e-09	9.69865e-12	1.53044e-09	1.55898e-11	9.5296e-14	5.27956e-09	5.31063e-10	0.00295287	1.805e-05	0.00183702	0.100588
85	2022-03-09 12:53:31	3291487	2.53162e-11	4.83339e-11	5.32432e-09	8.74943e-12	1.44105e-09	1.64049e-11	9.66678e-14	5.2977e-09	5.00044e-10	0.00309661	1.82471e-05	0.00165155	0.094389
86	2022-03-09 12:54:12	3332584	3.61199e-11	4.49553e-11	5.22263e-09	8.213e-12	1.38874e-09	2.34057e-11	8.99106e-14	5.19652e-09	4.81893e-10	0.00450411	1.73021e-05	0.00158048	0.0927338
87	2022-03-09 12:54:53	3373682	1.05349e-11	2.67009e-11	5.1393e-09	7.55617e-12	1.32539e-09	6.82662e-12	5.34018e-14	5.1136e-09	4.5991e-10	0.00133499	1.04431e-05	0.00147766	0.0899386
88	2022-03-09 12:55:34	3414779	2.58537e-11	5.69339e-11	5.13469e-09	7.3659e-12	1.29336e-09	1.67532e-11	1.13868e-13	5.10902e-09	4.48796e-10	0.00327914	2.22876e-05	0.00144175	0.0878439
89	2022-03-09 12:56:15	3455877	1.40824e-11	3.8618e-11	5.09972e-09	7.04985e-12	1.24789e-09	9.1254e-12	7.7236e-14	5.07422e-09	4.33018e-10	0.00179838	1.52213e-05	0.00138935	0.0853368
90	2022-03-09 12:56:56	3496974	2.75629e-11	4.27439e-11	5.04642e-09	6.94665e-12	1.22366e-09	1.78608e-11	8.54878e-14	5.02119e-09	4.2461e-10	0.00355708	1.70254e-05	0.00138347	0.0845637
91	2022-03-09 12:57:38	3538072	2.99387e-11	4.83032e-11	5.04889e-09	6.50375e-12	1.20278e-09	1.94003e-11	9.66064e-14	5.02365e-09	4.17365e-10	0.00386179	1.92303e-05	0.00129463	0.08308
92	2022-03-09 12:58:19	3579169	2.55312e-11	4.70644e-11	5.04792e-09	6.22747e-12	1.17566e-09	1.65442e-11	9.41288e-14	5.02268e-09	4.07954e-10	0.0032939	1.87408e-05	0.00123987	0.0812224
93	2022-03-09 12:59:00	3620267	1.95327e-11	3.37344e-11	5.02428e-09	6.27692e-12	1.14723e-09	1.26572e-11	6.74688e-14	4.99916e-09	3.98089e-10	0.00253186	1.3496e-05	0.0012556	0.0796312
94	2022-03-09 12:59:41	3661364	3.36044e-11	3.56694e-11	5.07344e-09	6.07267e-12	1.15683e-09	2.17757e-11	7.13388e-14	5.04807e-09	4.0142e-10	0.00431366	1.41319e-05	0.00120297	0.0795195
95	2022-03-09 13:00:22	3702462	2.94119e-11	4.50372e-11	5.11006e-09	5.59645e-12	1.12515e-09	1.90589e-11	9.00744e-14	5.08451e-09	3.90427e-10	0.00374843	1.77155e-05	0.00110069	0.0767876
96	2022-03-09 13:01:03	3743559	2.40907e-11	4.35528e-11	5.09443e-09	5.27932e-12	1.10379e-09	1.56108e-11	8.71056e-14	5.06896e-09	3.83015e-10	0.00307968	1.71841e-05	0.0010415	0.0755609
97	2022-03-09 13:01:44	3784657	2.08979e-11	4.50987e-11	5.46286e-09	5.22665e-12	1.10895e-09	1.35418e-11	9.01974e-14	5.43555e-09	3.84806e-10	0.00249135	1.6594e-05	0.000961569	0.0707943
98	2022-03-09 13:02:25	3825754	2.59074e-12	3.82494e-11	5.94135e-09	4.88802e-12	1.11747e-09	1.6788e-12	7.64988e-14	5.91164e-09	3.87762e-10	0.000283982	1.29404e-05	0.000826846	0.0655929
99	2022-03-09 13:03:06	3866852	8.56773e-12	4.36039e-11	1.07141e-07	4.9321e-12	1.17446e-09	5.55189e-12	8.72078e-14	1.06605e-07	4.07538e-10	5.20789e-05	8.18044e-07	4.62651e-05	0.00382286
100	2022-03-09 13:03:49	3909490	1.58992e-11	3.30485e-11	3.37101e-07	4.57305e-12	1.00217e-09	1.03027e-11	6.6097e-14	3.35415e-07	3.47753e-10	3.07162e-05	1.9706e-07	1.3634e-05	0.00103678
101	2022-03-09 13:04:27	3947987	1.07392e-11	1.96264e-11	3.9757e-07	4.09682e-12	8.85079e-10	6.959e-12	3.92528e-14	3.95582e-07	3.07122e-10	1.75918e-05	9.92279e-08	1.03564e-05	0.000776381
102	2022-03-09 13:05:06	3986484	2.37488e-10	3.00283e-11	3.97838e-07	1.45565e-10	4.35327e-09	1.53892e-10	6.00566e-14	3.95849e-07	1.51058e-09	0.000388765	1.51716e-07	0.000367729	0.00381606
103	2022-03-09 13:05:50	4030313	1.02786e-08	2.47147e-11	3.68276e-07	2.93124e-10	4.73768e-09	6.66053e-09	4.94294e-14	3.66435e-07	1.64397e-09	0.0181766	1.34893e-07	0.000799935	0.00448641
104	2022-03-09 13:06:23	4063730	1.24337e-08	3.99387e-11	3.62095e-07	3.03618e-10	3.35169e-09	8.05704e-09	7.98774e-14	3.60285e-07	1.16304e-09	0.022363	2.21706e-07	0.000842717	0.00322811
105	2022-03-09 13:06:53	4093497	1.31015e-08	2.34451e-11	3.57257e-07	2.94894e-10	2.59644e-09	8.48977e-09	4.68902e-14	3.55471e-07	9.00965e-10	0.0238832	1.3191e-07	0.000829587	0.00253457
106	2022-03-09 13:07:23	4123264	1.37398e-08	3.7973e-11	3.50538e-07	1.91919e-10	1.95359e-09	8.90339e-09	7.5946e-14	3.48785e-07	6.77896e-10	0.0255269	2.17744e-07	0.00055025	0.00194359
107	2022-03-09 13:07:54	4154580	4.55249e-09	3.89968e-11	3.25993e-07	9.13019e-11	1.58154e-09	2.95001e-09	7.79936e-14	3.24363e-07	5.48794e-10	0.00909479	2.40452e-07	0.000281481	0.00169191
108	2022-03-09 13:08:26	4186447	1.94622e-09	3.26901e-11	4.52395e-07	3.86785e-11	1.28436e-09	1.26115e-09	6.53802e-14	4.50133e-07	4.45673e-10	0.00280173	1.45246e-07	8.59268e-05	0.000990092
109	2022-03-09 13:09:05	4225855	5.53538e-10	2.8257e-11	3.48478e-07	1.84394e-11	2.1794e-09	3.58693e-10	5.6514e-14	3.46736e-07	7.56252e-10	0.00103448	1.62989e-07	5.318e-05	0.00218106
110	2022-03-09 13:09:44	4264352	1.45479e-10	1.81521e-11	5.65478e-08	1.69925e-11	2.54401e-09	9.42704e-11	3.63042e-14	5.62651e-08	8.82771e-10	0.00167547	6.45235e-07	0.000302008	0.0156895
111	2022-03-09 13:10:23	4303869	6.48116e-11	1.8838e-11	1.37078e-08	1.53875e-11	2.24359e-09	4.19979e-11	3.7676e-14	1.36393e-08	7.78526e-10	0.00307919	2.76232e-06	0.00112818	0.0570798
112	2022-03-09 13:11:02	4342867	5.06754e-11	4.44025e-11	6.92229e-09	1.40588e-11	1.99763e-09	3.28377e-11	8.8805e-14	6.88768e-09	6.93178e-10	0.00476759	1.28933e-05	0.00204115	0.10064
113	2022-03-09 13:11:44	4384984	4.18926e-11	4.56004e-11	5.91653e-09	1.25549e-11	1.8353e-09	2.71464e-11	9.12008e-14	5.88695e-09	6.36849e-10	0.00461129	1.5492e-05	0.00213267	0.10818
114	2022-03-09 13:12:26	4426082	2.90679e-11	2.91478e-11	5.54174e-09	1.10606e-11	1.69361e-09	1.8836e-11	5.82956e-14	5.51403e-09	5.87683e-10	0.00341601	1.05722e-05	0.0020059	0.106579
115	2022-03-09 13:13:07	4467179	3.40666e-11	4.43923e-11	5.41884e-09	9.70188e-12	1.56595e-09	2.20752e-11	8.87846e-14	5.39175e-09	5.43385e-10	0.00409425	1.64668e-05	0.00179939	0.100781
116	2022-03-09 13:13:48	4508277	3.37656e-11	3.56899e-11	5.30454e-09	9.0945e-12	1.47896e-09	2.18801e-11	7.13798e-14	5.27802e-09	5.13199e-10	0.00414552	1.3524e-05	0.00172309	0.0972333
117	2022-03-09 13:14:29	4549374	3.09492e-11	3.5782e-11	5.25086e-09	8.18828e-12	1.39102e-09	2.00551e-11	7.1564e-14	5.22461e-09	4.82684e-10	0.00383858	1.36975e-05	0.00156725	0.0923867
118	2022-03-09 13:15:10	4590472	2.16504e-11	4.29282e-11	5.1948e-09	7.8905e-12	1.33679e-09	1.40295e-11	8.58564e-14	5.16883e-09	4.63866e-10	0.00271424	1.66104e-05	0.00152656	0.089743
119	2022-03-09 13:15:51	4631569	2.91109e-11	4.1802e-11	5.25904e-09	7.41427e-12	1.29228e-09	1.88639e-11	8.3604e-14	5.23274e-09	4.48421e-10	0.00360497	1.59771e-05	0.0014169	0.0856952
120	2022-03-09 13:16:32	4672667	5.10301e-11	4.03585e-11	5.21918e-09	7.23475e-12	1.24885e-09	3.30675e-11	8.0717e-14	5.19308e-09	4.33351e-10	0.0063676	1.55432e-05	0.00139315	0.0834477
121	2022-03-09 13:17:13	4713764	2.45099e-11	2.91683e-11	5.13264e-09	6.61017e-12	1.22269e-09	1.58824e-11	5.83366e-14	5.10698e-09	4.24273e-10	0.00310994	1.14229e-05	0.00129434	0.0830772
122	2022-03-09 13:17:54	4754862	2.60794e-11	3.62325e-11	5.2007e-09	6.57362e-12	1.18814e-09	1.68995e-11	7.2465e-14	5.1747e-09	4.12285e-10	0.00326579	1.40037e-05	0.00127034	0.0796732
123	2022-03-09 13:18:35	4795959	2.41659e-11	3.95087e-11	5.10652e-09	6.14577e-12	1.15514e-09	1.56595e-11	7.90174e-14	5.08099e-09	4.00834e-10	0.00308198	1.55516e-05	0.00120956	0.0788889
124	2022-03-09 13:19:17	4837057	1.24269e-11	4.25596e-11	5.10795e-09	5.94367e-12	1.16906e-09	8.05263e-12	8.51192e-14	5.08241e-09	4.05664e-10	0.00158441	1.67478e-05	0.00116946	0.0798172
125	2022-03-09 13:19:58	4878154	2.05217e-11	2.36397e-11	5.10187e-09	5.19225e-12	1.13955e-09	1.32981e-11	4.72794e-14	5.07636e-09	3.95424e-10	0.00261961	9.31364e-06	0.00102283	0.0778951
126	2022-03-09 13:20:39	4919252	1.86512e-11	4.30204e-11	5.64815e-09	5.13312e-12	1.11243e-09	1.2086e-11	8.60408e-14	5.61991e-09	3.86013e-10	0.00215056	1.531e-05	0.000913381	0.0686867
127	2022-03-09 13:21:20	4960349	2.82079e-11	4.23753e-11	5.06309e-09	5.30405e-12	1.11364e-09	1.82787e-11	8.47506e-14	5.03777e-09	3.86433e-10	0.00362833	1.6823e-05	0.00105286	0.0767071
128	2022-03-09 13:22:01	5001447	2.11559e-11	5.05351e-11	5.18068e-09	4.38815e-12	1.09551e-09	1.3709e-11	1.0107e-13	5.15478e-09	3.80142e-10	0.00265948	1.96071e-05	0.000851278	0.0737456
129	2022-03-09 13:22:42	5042544	1.87372e-11	3.02945e-11	5.46388e-09	4.74505e-12	1.07812e-09	1.21417e-11	6.0589e-14	5.43656e-09	3.74108e-10	0.00223334	1.11447e-05	0.000872804	0.0688133
130	2022-03-09 13:23:23	5083642	2.11882e-11	3.00283e-11	5.91705e-09	4.76547e-12	1.0786e-09	1.373e-11	6.00566e-14	5.88746e-09	3.74274e-10	0.00233207	1.02008e-05	0.000809427	0.0635714
131	2022-03-09 13:24:04	5124739	2.95409e-11	3.6939e-11	7.9785e-08	5.0138e-12	1.15406e-09	1.91425e-11	7.3878e-14	7.93861e-08	4.00459e-10	0.000241132	9.30617e-07	6.31572e-05	0.00504445
132	2022-03-09 13:24:46	5166857	5.77274e-12	1.55413e-11	3.31816e-07	4.34085e-12	9.51064e-10	3.74074e-12	3.10826e-14	3.30157e-07	3.30019e-10	1.13302e-05	9.41449e-08	1.31478e-05	0.000999583
133	2022-03-09 13:25:26	5206374	9.78248e-12	3.3417e-11	3.97122e-07	3.88505e-12	8.54121e-10	6.33905e-12	6.6834e-14	3.95136e-07	2.9638e-10	1.60427e-05	1.69142e-07	9.83217e-06	0.00075007
134	2022-03-09 13:26:04	5244872	8.62256e-11	2.98132e-11	4.00078e-07	1.32322e-10	3.93046e-09	5.58742e-11	5.96264e-14	3.98078e-07	1.36387e-09	0.00014036	1.49786e-07	0.000332403	0.00342614
135	2022-03-09 13:26:48	5288700	9.80463e-09	3.73996e-11	3.62005e-07	2.87199e-10	4.71572e-09	6.3534e-09	7.47992e-14	3.60195e-07	1.63635e-09	0.0176388	2.07663e-07	0.000797343	0.00454297
136	2022-03-09 13:27:22	5322117	1.21346e-08	4.30818e-11	3.61199e-07	3.00327e-10	3.38649e-09	7.86322e-09	8.61636e-14	3.59393e-07	1.17511e-09	0.0218792	2.39748e-07	0.000835651	0.00326971
137	2022-03-09 13:27:51	5351884	1.2865e-08	3.31713e-11	3.56451e-07	2.92765e-10	2.58972e-09	8.33652e-09	6.63426e-14	3.54669e-07	8.98633e-10	0.0235051	1.87055e-07	0.00082546	0.00253372
138	2022-03-09 13:28:21	5381650	1.28435e-08	3.1134e-11	4.05184e-07	2.28633e-10	2.04082e-09	8.32259e-09	6.2268e-14	4.03158e-07	7.08165e-10	0.0206435	1.54451e-07	0.000567105	0.00175654
139	2022-03-09 13:28:54	5414007	5.15593e-09	3.49323e-11	4.26147e-07	8.37844e-11	1.49192e-09	3.34104e-09	6.98646e-14	4.24016e-07	5.17696e-10	0.00787952	1.64769e-07	0.000197597	0.00122093
140	2022-03-09 13:29:25	5445874	1.66558e-09	1.39135e-11	4.73537e-07	3.61479e-11	1.22941e-09	1.0793e-09	2.7827e-14	4.71169e-07	4.26605e-10	0.00229068	5.90594e-08	7.67196e-05	0.000905418
141	2022-03-09 13:30:05	5485281	4.53971e-10	3.41644e-11	2.90518e-07	1.84115e-11	2.21059e-09	2.94173e-10	6.83288e-14	2.89065e-07	7.67075e-10	0.00101767	2.36378e-07	6.36932e-05	0.00265364
142	2022-03-09 13:30:43	5523779	1.40298e-10	3.72768e-11	4.79371e-08	1.84975e-11	2.47179e-09	9.09131e-11	7.45536e-14	4.76974e-08	8.57711e-10	0.00190604	1.56305e-06	0.000387809	0.0179823
143	2022-03-09 13:31:23	5563297	6.71121e-11	4.29691e-11	1.2092e-08	1.67345e-11	2.17724e-09	4.34886e-11	8.59382e-14	1.20315e-08	7.55502e-10	0.00361455	7.14274e-06	0.00139089	0.0627935
144	2022-03-09 13:32:02	5602294	5.15676e-11	3.88125e-11	6.63828e-09	1.46447e-11	1.92648e-09	3.34158e-11	7.7625e-14	6.60509e-09	6.68489e-10	0.0050591	1.17523e-05	0.00221718	0.101208
145	2022-03-09 13:32:44	5644412	4.37094e-11	3.83109e-11	5.76578e-09	1.26656e-11	1.78323e-09	2.83237e-11	7.66218e-14	5.73695e-09	6.18781e-10	0.00493706	1.33558e-05	0.00220772	0.107859
146	2022-03-09 13:33:25	5685509	3.30454e-11	4.16382e-11	5.46814e-09	1.11456e-11	1.63062e-09	2.14134e-11	8.32764e-14	5.4408e-09	5.65825e-10	0.00393571	1.53059e-05	0.00204852	0.103997
147	2022-03-09 13:34:06	5726607	2.71222e-11	4.35732e-11	5.43929e-09	1.01211e-11	1.53379e-09	1.75752e-11	8.71464e-14	5.41209e-09	5.32225e-10	0.00324739	1.61022e-05	0.00187009	0.09834
148	2022-03-09 13:34:47	5767704	1.85974e-11	4.7607e-11	5.33448e-09	8.96443e-12	1.43145e-09	1.20511e-11	9.5214e-14	5.30781e-09	4.96713e-10	0.00227045	1.79385e-05	0.00168891	0.0935816
149	2022-03-09 13:35:28	5808802	3.91191e-11	3.58742e-11	5.26284e-09	8.39575e-12	1.37459e-09	2.53492e-11	7.17484e-14	5.23653e-09	4.76983e-10	0.00484084	1.37015e-05	0.00160331	0.0910876
150	2022-03-09 13:36:09	5849899	3.90224e-11	4.70951e-11	5.18734e-09	7.54327e-12	1.33271e-09	2.52865e-11	9.41902e-14	5.1614e-09	4.6245e-10	0.00489916	1.8249e-05	0.00146148	0.0895978
151	2022-03-09 13:36:50	5890997	3.05837e-11	4.24061e-11	5.18838e-09	7.11757e-12	1.27368e-09	1.98182e-11	8.48122e-14	5.16244e-09	4.41967e-10	0.00383893	1.64287e-05	0.00137872	0.0856121
152	2022-03-09 13:37:32	5932094	2.82939e-11	2.7479e-11	5.37492e-09	6.93482e-12	1.21909e-09	1.83344e-11	5.4958e-14	5.34805e-09	4.23024e-10	0.00342825	1.02763e-05	0.0012967	0.0790988
153	2022-03-09 13:38:13	5973192	2.50904e-11	4.15563e-11	5.11585e-09	6.40377e-12	1.19462e-09	1.62586e-11	8.31126e-14	5.09027e-09	4.14533e-10	0.00319405	1.63277e-05	0.00125804	0.0814364
154	2022-03-09 13:38:54	6014289	3.25079e-11	3.17994e-11	5.06795e-09	6.2694e-12	1.16931e-09	2.10651e-11	6.35988e-14	5.04261e-09	4.05751e-10	0.00417742	1.26123e-05	0.00124328	0.0804644
155	2022-03-09 13:39:35	6055387	3.03364e-11	4.03994e-11	5.06194e-09	6.1404e-12	1.15022e-09	1.9658e-11	8.07988e-14	5.03663e-09	3.99126e-10	0.003903	1.60422e-05	0.00121915	0.0792447
156	2022-03-09 13:40:16	6096484	1.99949e-11	3.9478e-11	5.02941e-09	5.82542e-12	1.11964e-09	1.29567e-11	7.8956e-14	5.00426e-09	3.88515e-10	0.00258913	1.57777e-05	0.00116409	0.0776368
157	2022-03-09 13:40:57	6137582	3.18952e-11	4.20068e-11	5.03734e-09	5.8308e-12	1.114e-09	2.06681e-11	8.40136e-14	5.01215e-09	3.86558e-10	0.00412359	1.6762e-05	0.00116333	0.0771241
158	2022-03-09 13:41:38	6178679	2.43487e-11	4.95932e-11	5.11324e-09	5.43305e-12	1.09719e-09	1.5778e-11	9.91864e-14	5.08767e-09	3.80725e-10	0.00310121	1.94954e-05	0.00106788	0.0748328
159	2022-03-09 13:42:19	6219777	7.20248e-12	2.9547e-11	4.99214e-09	5.32555e-12	1.08496e-09	4.66721e-12	5.9094e-14	4.96718e-09	3.76481e-10	0.000939609	1.18969e-05	0.00107215	0.0757937
160	2022-03-09 13:43:00	6260874	2.16074e-11	4.89072e-11	5.01406e-09	4.44835e-12	1.07032e-09	1.40016e-11	9.78144e-14	4.98899e-09	3.71401e-10	0.0028065	1.96061e-05	0.000891633	0.0744441
161	2022-03-09 13:43:41	6301972	1.97477e-11	3.74304e-11	5.44902e-09	4.66227e-12	1.05629e-09	1.27965e-11	7.48608e-14	5.42177e-09	3.66533e-10	0.00236021	1.38074e-05	0.000859916	0.0676038
162	2022-03-09 13:44:23	6343069	1.17282e-11	3.25877e-11	5.88325e-09	4.66872e-12	1.04692e-09	7.59987e-12	6.51754e-14	5.85383e-09	3.63281e-10	0.00129827	1.11338e-05	0.000797549	0.0620587
163	2022-03-09 13:45:04	6384167	3.18414e-11	3.18199e-11	7.28607e-08	4.8934e-12	1.13175e-09	2.06332e-11	6.36398e-14	7.24964e-08	3.92717e-10	0.00028461	8.77834e-07	6.74985e-05	0.00541706
164	2022-03-09 13:45:46	6426284	2.33382e-11	3.73587e-11	3.28859e-07	4.08177e-12	9.50107e-10	1.51232e-11	7.47174e-14	3.27215e-07	3.29687e-10	4.62178e-05	2.28344e-07	1.24743e-05	0.00100756
165	2022-03-09 13:46:25	6465802	-5.55774e-12	1.92885e-11	3.94345e-07	3.77862e-12	8.52079e-10	-3.60142e-12	3.8577e-14	3.92373e-07	2.95671e-10	-9.17854e-06	9.83171e-08	9.63017e-06	0.000753546
166	2022-03-09 13:47:04	6504299	4.52359e-11	3.11032e-11	4.00705e-07	1.25053e-10	4.0027e-09	2.93129e-11	6.22064e-14	3.98701e-07	1.38894e-09	7.35208e-05	1.56022e-07	0.000313651	0.00348365
167	2022-03-09 13:47:48	6548128	9.52922e-09	2.66497e-11	3.6532e-07	2.80204e-10	4.79623e-09	6.17493e-09	5.32994e-14	3.63493e-07	1.66429e-09	0.0169877	1.46631e-07	0.000770864	0.0045786
168	2022-03-09 13:48:21	6581545	1.21582e-08	3.88637e-11	3.58333e-07	2.9349e-10	3.38649e-09	7.87851e-09	7.77274e-14	3.56541e-07	1.17511e-09	0.0220971	2.18004e-07	0.000823158	0.00329586
169	2022-03-09 13:48:51	6611312	1.26258e-08	3.61609e-11	3.55376e-07	2.87922e-10	2.59859e-09	8.18152e-09	7.23218e-14	3.53599e-07	9.01711e-10	0.0231378	2.0453e-07	0.000814261	0.00255009
170	2022-03-09 13:49:21	6641079	1.26614e-08	3.6683e-11	3.84401e-07	2.30178e-10	2.05966e-09	8.20459e-09	7.3366e-14	3.82479e-07	7.14702e-10	0.0214511	1.91817e-07	0.000601806	0.0018686
171	2022-03-09 13:49:53	6673436	5.42645e-09	2.82264e-11	4.23638e-07	8.30997e-11	1.48808e-09	3.51634e-09	5.64528e-14	4.2152e-07	5.16364e-10	0.00834205	1.33927e-07	0.000197143	0.001225
172	2022-03-09 13:50:24	6704264	1.76952e-09	1.86537e-11	4.70401e-07	3.58964e-11	1.24117e-09	1.14665e-09	3.73074e-14	4.68049e-07	4.30686e-10	0.00244985	7.97083e-08	7.66937e-05	0.000920173
173	2022-03-09 13:51:03	6743671	4.97089e-10	1.70259e-11	2.94012e-07	1.77525e-11	2.31449e-09	3.22114e-10	3.40518e-14	2.92542e-07	8.03128e-10	0.00110109	1.164e-07	6.06836e-05	0.00274534
174	2022-03-09 13:51:42	6782169	1.26409e-10	4.96239e-11	4.62988e-08	1.72311e-11	2.48282e-09	8.1913e-11	9.92478e-14	4.60673e-08	8.61539e-10	0.00177812	2.15441e-06	0.000374042	0.0187017
175	2022-03-09 13:52:21	6821687	6.96921e-11	3.01716e-11	1.17527e-08	1.56262e-11	2.21623e-09	4.51605e-11	6.03432e-14	1.16939e-08	7.69032e-10	0.00386187	5.16021e-06	0.00133627	0.0657633
176	2022-03-09 13:53:00	6860684	5.98881e-11	3.22909e-11	6.65403e-09	1.38664e-11	1.9506e-09	3.88075e-11	6.45818e-14	6.62076e-09	6.76858e-10	0.00586149	9.75444e-06	0.00209438	0.102233
177	2022-03-09 13:53:42	6902802	5.60934e-11	3.83825e-11	5.75669e-09	1.23238e-11	1.76319e-09	3.63485e-11	7.6765e-14	5.72791e-09	6.11827e-10	0.00634587	1.34019e-05	0.00215154	0.106815
178	2022-03-09 13:54:23	6943899	3.88719e-11	3.7072e-11	5.46887e-09	1.08521e-11	1.62629e-09	2.5189e-11	7.4144e-14	5.44153e-09	5.64323e-10	0.00462903	1.36256e-05	0.00199431	0.103707
179	2022-03-09 13:55:04	6984997	2.83154e-11	4.45766e-11	5.33812e-09	9.96095e-12	1.52024e-09	1.83484e-11	8.91532e-14	5.31143e-09	5.27523e-10	0.00345451	1.67852e-05	0.00187538	0.0993185
180	2022-03-09 13:55:46	7026094	2.69609e-11	4.10547e-11	5.23834e-09	8.80318e-12	1.42317e-09	1.74707e-11	8.21094e-14	5.21215e-09	4.9384e-10	0.00335191	1.57535e-05	0.00168897	0.0947479
181	2022-03-09 13:56:27	7067192	2.79822e-11	2.41823e-11	5.19188e-09	8.42693e-12	1.36883e-09	1.81325e-11	4.83646e-14	5.16592e-09	4.74984e-10	0.00351002	9.36224e-06	0.00163125	0.0919457
182	2022-03-09 13:57:08	7108289	3.18844e-11	4.70849e-11	5.13193e-09	7.63142e-12	1.30511e-09	2.06611e-11	9.41698e-14	5.10627e-09	4.52873e-10	0.00404622	1.8442e-05	0.00149452	0.0886896
183	2022-03-09 13:57:49	7149387	2.69932e-11	4.11058e-11	5.12753e-09	7.3143e-12	1.25413e-09	1.74916e-11	8.22116e-14	5.10189e-09	4.35183e-10	0.00342845	1.61139e-05	0.00143364	0.0852984
184	2022-03-09 13:58:30	7190484	2.41122e-11	3.74406e-11	5.1268e-09	6.78755e-12	1.21681e-09	1.56247e-11	7.48812e-14	5.10117e-09	4.22233e-10	0.00306297	1.46792e-05	0.00133059	0.0827719
185	2022-03-09 13:59:11	7231582	3.49911e-11	2.3824e-11	5.11893e-09	6.15652e-12	1.18982e-09	2.26742e-11	4.7648e-14	5.09334e-09	4.12868e-10	0.00445175	9.35497e-06	0.00120874	0.0810603
186	2022-03-09 13:59:52	7272679	9.41698e-12	3.79013e-11	5.11615e-09	6.05117e-12	1.15035e-09	6.1022e-12	7.58026e-14	5.09057e-09	3.99171e-10	0.00119873	1.48908e-05	0.0011887	0.0784139
187	2022-03-09 14:00:33	7313777	2.81219e-11	3.83006e-11	5.06792e-09	5.86627e-12	1.13979e-09	1.8223e-11	7.66012e-14	5.04258e-09	3.95507e-10	0.00361382	1.51909e-05	0.00116335	0.0784335
188	2022-03-09 14:01:14	7354874	1.07929e-11	2.98132e-11	5.09044e-09	5.43735e-12	1.11784e-09	6.9938e-12	5.96264e-14	5.06499e-09	3.8789e-10	0.00138081	1.17723e-05	0.00107352	0.0765827
189	2022-03-09 14:01:55	7395972	2.33919e-11	3.14718e-11	5.07527e-09	5.38037e-12	1.07979e-09	1.5158e-11	6.29436e-14	5.04989e-09	3.74687e-10	0.00300164	1.24643e-05	0.00106544	0.074197
190	2022-03-09 14:02:37	7437069	2.57784e-11	2.78169e-11	5.03308e-09	5.23202e-12	1.07512e-09	1.67044e-11	5.56338e-14	5.00791e-09	3.73067e-10	0.0033356	1.11092e-05	0.00104475	0.0744954
191	2022-03-09 14:03:18	7478167	1.49209e-11	5.44768e-11	5.0529e-09	5.17612e-12	1.063e-09	9.66874e-12	1.08954e-13	5.02764e-09	3.68861e-10	0.00192312	2.16709e-05	0.00102953	0.0733667
192	2022-03-09 14:03:59	7519264	2.96807e-11	4.26109e-11	5.03481e-09	4.02695e-12	1.04633e-09	1.92331e-11	8.52218e-14	5.00964e-09	3.63077e-10	0.00383922	1.70116e-05	0.000803841	0.0724756
193	2022-03-09 14:04:40	7560362	1.67162e-11	4.42285e-11	5.43859e-09	4.6354e-12	1.03636e-09	1.08321e-11	8.8457e-14	5.4114e-09	3.59617e-10	0.00200172	1.63464e-05	0.000856599	0.0664555
194	2022-03-09 14:05:21	7601459	5.31049e-12	4.50885e-11	5.85881e-09	4.51177e-12	1.05053e-09	3.4412e-12	9.0177e-14	5.82952e-09	3.64534e-10	0.000590306	1.5469e-05	0.000773953	0.0625324
195	2022-03-09 14:06:02	7642557	1.09757e-11	4.21706e-11	6.19545e-08	4.816e-12	1.14279e-09	7.11225e-12	8.43412e-14	6.16447e-08	3.96548e-10	0.000115375	1.36818e-06	7.81251e-05	0.0064328
196	2022-03-09 14:06:44	7684675	1.38782e-11	1.74559e-11	3.24201e-07	4.13337e-12	9.36543e-10	8.99307e-12	3.49118e-14	3.2258e-07	3.2498e-10	2.78786e-05	1.08227e-07	1.28135e-05	0.00100744
197	2022-03-09 14:07:24	7724194	7.00898e-12	3.9867e-11	3.9533e-07	3.70875e-12	8.354e-10	4.54182e-12	7.9734e-14	3.93353e-07	2.89884e-10	1.15464e-05	2.02703e-07	9.42855e-06	0.000736955
198	2022-03-09 14:08:02	7762692	2.01562e-11	2.50218e-11	4.00884e-07	1.14734e-10	3.91464e-09	1.30612e-11	5.00436e-14	3.9888e-07	1.35838e-09	3.27448e-05	1.2546e-07	0.000287641	0.00340549
199	2022-03-09 14:08:46	7806520	9.30324e-09	3.20349e-11	3.61916e-07	2.81554e-10	5.00764e-09	6.0285e-09	6.40698e-14	3.60106e-07	1.73765e-09	0.0167409	1.77919e-07	0.000781863	0.00482538
200	2022-03-09 14:09:19	7839938	1.19855e-08	4.39315e-11	3.59408e-07	2.92796e-10	3.48764e-09	7.7666e-09	8.7863e-14	3.57611e-07	1.21021e-09	0.021718	2.45694e-07	0.000818756	0.00338416
201	2022-03-09 14:09:49	7869704	1.26111e-08	3.76556e-11	3.53495e-07	2.83605e-10	2.60196e-09	8.17199e-09	7.53112e-14	3.51728e-07	9.0288e-10	0.0232339	2.14118e-07	0.00080632	0.00256699
202	2022-03-09 14:10:19	7899470	1.28576e-08	2.92604e-11	3.6738e-07	2.33914e-10	2.07081e-09	8.33172e-09	5.85208e-14	3.65543e-07	7.18571e-10	0.0227927	1.60093e-07	0.000639908	0.00196576
203	2022-03-09 14:10:51	7931828	5.51775e-09	2.53699e-11	4.19787e-07	8.41413e-11	1.49324e-09	3.5755e-09	5.07398e-14	4.17688e-07	5.18154e-10	0.00856022	1.21478e-07	0.000201445	0.00124053
204	2022-03-09 14:11:23	7963694	1.74165e-09	4.28258e-11	4.68341e-07	3.53535e-11	1.21382e-09	1.12859e-09	8.56516e-14	4.65999e-07	4.21196e-10	0.00242187	1.83802e-07	7.5866e-05	0.000903854
205	2022-03-09 14:12:03	8003101	4.91628e-10	2.22678e-11	2.8353e-07	1.80008e-11	2.20867e-09	3.18575e-10	4.45356e-14	2.82112e-07	7.66408e-10	0.00112925	1.57865e-07	6.38072e-05	0.00271668
206	2022-03-09 14:12:41	8041599	1.32063e-10	2.71207e-11	4.92108e-08	1.64227e-11	2.36896e-09	8.55768e-11	5.42414e-14	4.89647e-08	8.22029e-10	0.00174772	1.10776e-06	0.000335398	0.0167882
207	2022-03-09 14:13:21	8081117	6.57039e-11	3.56694e-11	1.23642e-08	1.58508e-11	2.14196e-09	4.25761e-11	7.13388e-14	1.23024e-08	7.4326e-10	0.0034608	5.79878e-06	0.00128843	0.060416
208	2022-03-09 14:14:00	8120114	3.61521e-11	2.2708e-11	6.70077e-09	1.44791e-11	1.89685e-09	2.34266e-11	4.5416e-14	6.66727e-09	6.58207e-10	0.00351367	6.81179e-06	0.00217167	0.0987222
209	2022-03-09 14:14:42	8162232	3.74206e-11	5.20196e-11	5.79436e-09	1.26301e-11	1.7212e-09	2.42485e-11	1.04039e-13	5.76539e-09	5.97256e-10	0.00420588	1.80455e-05	0.00219068	0.103593
210	2022-03-09 14:15:23	8203329	3.78936e-11	3.46763e-11	5.50819e-09	1.1023e-11	1.58875e-09	2.45551e-11	6.93526e-14	5.48065e-09	5.51296e-10	0.00448032	1.26541e-05	0.00201126	0.10059
211	2022-03-09 14:16:04	8244427	3.01429e-11	4.16382e-11	5.35478e-09	1.00716e-11	1.46709e-09	1.95326e-11	8.32764e-14	5.32801e-09	5.0908e-10	0.00366602	1.56299e-05	0.00189031	0.095548
212	2022-03-09 14:16:45	8285524	3.08417e-11	2.42028e-11	5.2965e-09	9.18588e-12	1.38982e-09	1.99854e-11	4.84056e-14	5.27002e-09	4.82268e-10	0.00379229	9.18509e-06	0.00174305	0.0915116
213	2022-03-09 14:17:26	8326622	3.02397e-11	3.2301e-11	5.23643e-09	8.16355e-12	1.32239e-09	1.95953e-11	6.4602e-14	5.21025e-09	4.58869e-10	0.00376092	1.2399e-05	0.00156683	0.0880705
214	2022-03-09 14:18:07	8367719	2.00917e-11	2.83083e-11	5.15557e-09	7.87438e-12	1.26133e-09	1.30194e-11	5.66166e-14	5.12979e-09	4.37682e-10	0.002538	1.10368e-05	0.00153503	0.0853215
215	2022-03-09 14:18:48	8408817	3.73024e-11	3.19223e-11	5.27464e-09	7.1638e-12	1.22294e-09	2.4172e-11	6.38446e-14	5.24827e-09	4.2436e-10	0.0046057	1.21649e-05	0.00136498	0.0808572
216	2022-03-09 14:19:29	8449914	2.10162e-11	2.41004e-11	5.11766e-09	6.69832e-12	1.19678e-09	1.36185e-11	4.82008e-14	5.09207e-09	4.15283e-10	0.00267445	9.46585e-06	0.00131544	0.0815548
217	2022-03-09 14:20:11	8491012	2.11129e-11	3.97749e-11	5.11094e-09	6.29412e-12	1.18154e-09	1.36812e-11	7.95498e-14	5.08539e-09	4.09994e-10	0.00269029	1.56428e-05	0.00123769	0.0806221
218	2022-03-09 14:20:52	8532109	2.20159e-11	3.59766e-11	5.1047e-09	6.11675e-12	1.13259e-09	1.42663e-11	7.19532e-14	5.07918e-09	3.93009e-10	0.00280878	1.41663e-05	0.00120428	0.0773765
219	2022-03-09 14:21:33	8573207	1.35342e-11	3.28949e-11	5.11092e-09	5.68352e-12	1.10619e-09	8.77016e-12	6.57898e-14	5.08537e-09	3.83848e-10	0.00172459	1.29371e-05	0.00111762	0.0754809
220	2022-03-09 14:22:14	8614304	1.21259e-11	2.92194e-11	5.05124e-09	5.461e-12	1.11147e-09	7.85758e-12	5.84388e-14	5.02598e-09	3.8568e-10	0.00156339	1.16273e-05	0.00108655	0.0767372
221	2022-03-09 14:22:55	8655402	1.77589e-11	3.85156e-11	5.05471e-09	5.5083e-12	1.07476e-09	1.15078e-11	7.70312e-14	5.02944e-09	3.72942e-10	0.00228808	1.53161e-05	0.00109521	0.0741518
222	2022-03-09 14:23:36	8696499	2.88959e-11	6.17253e-11	5.04619e-09	5.35027e-12	1.07932e-09	1.87245e-11	1.23451e-13	5.02096e-09	3.74524e-10	0.00372928	2.45871e-05	0.00106559	0.0745921
223	2022-03-09 14:24:17	8737597	2.30909e-11	3.9867e-11	5.02332e-09	5.25352e-12	1.0546e-09	1.49629e-11	7.9734e-14	4.9982e-09	3.65946e-10	0.00299366	1.59525e-05	0.00105108	0.0732155
224	2022-03-09 14:24:58	8778694	1.74579e-11	3.72358e-11	5.02365e-09	4.16777e-12	1.04357e-09	1.13127e-11	7.44716e-14	4.99853e-09	3.62119e-10	0.00226321	1.48987e-05	0.000833799	0.072445
225	2022-03-09 14:25:39	8819792	2.72404e-11	3.74509e-11	5.46181e-09	4.6999e-12	1.02281e-09	1.76518e-11	7.49018e-14	5.4345e-09	3.54915e-10	0.0032481	1.37826e-05	0.000864826	0.0653078
226	2022-03-09 14:26:19	8859849	-6.36399e-12	4.39725e-11	5.82094e-09	4.29677e-12	1.02186e-09	-4.12387e-12	8.7945e-14	5.79184e-09	3.54585e-10	-0.000712014	1.51843e-05	0.000741867	0.0612216
227	2022-03-09 14:27:00	8900947	2.81112e-11	3.18404e-11	5.04599e-08	4.95897e-12	1.13486e-09	1.82161e-11	6.36808e-14	5.02076e-08	3.93796e-10	0.000362815	1.26835e-06	9.87693e-05	0.00784336
228	2022-03-09 14:27:43	8943064	2.24029e-11	2.10904e-11	3.20887e-07	4.25915e-12	9.16271e-10	1.45171e-11	4.21808e-14	3.19283e-07	3.17946e-10	4.54678e-05	1.32111e-07	1.33398e-05	0.000995814
229	2022-03-09 14:28:22	8982582	5.18149e-12	2.27797e-11	3.94793e-07	3.5862e-12	8.18371e-10	3.35761e-12	4.55594e-14	3.92819e-07	2.83975e-10	8.54746e-06	1.15981e-07	9.12939e-06	0.000722915
230	2022-03-09 14:29:01	9021079	2.20159e-11	3.28744e-11	3.8897e-07	1.00123e-10	3.44889e-09	1.42663e-11	6.57488e-14	3.87025e-07	1.19676e-09	3.68614e-05	1.69882e-07	0.000258699	0.00309221
231	2022-03-09 14:29:44	9064908	9.06704e-09	2.88918e-11	3.65858e-07	2.75125e-10	4.85034e-09	5.87544e-09	5.77836e-14	3.64029e-07	1.68307e-09	0.0161401	1.58734e-07	0.000755778	0.00462345
232	2022-03-09 14:30:18	9098324	1.19922e-08	3.46866e-11	3.56988e-07	2.90666e-10	3.45344e-09	7.77095e-09	6.93732e-14	3.55203e-07	1.19834e-09	0.0218775	1.95306e-07	0.000818309	0.00337369
233	2022-03-09 14:30:48	9128092	1.24954e-08	4.33685e-11	3.52778e-07	2.83748e-10	2.58804e-09	8.09702e-09	8.6737e-14	3.51014e-07	8.9805e-10	0.0230675	2.47104e-07	0.000808366	0.00255844
234	2022-03-09 14:31:17	9157859	1.27137e-08	2.99361e-11	3.84222e-07	2.46727e-10	2.09313e-09	8.23848e-09	5.98722e-14	3.82301e-07	7.26316e-10	0.0215497	1.5661e-07	0.000645374	0.00189985
235	2022-03-09 14:31:50	9190216	6.01303e-09	1.92783e-11	4.20592e-07	9.05419e-11	1.48796e-09	3.89644e-09	3.85566e-14	4.18489e-07	5.16322e-10	0.00931074	9.21329e-08	0.000216354	0.00123378
236	2022-03-09 14:32:22	9222082	1.86113e-09	1.7937e-11	4.69774e-07	3.61866e-11	1.20397e-09	1.20601e-09	3.5874e-14	4.67425e-07	4.17778e-10	0.00258012	7.67481e-08	7.74169e-05	0.000893785
237	2022-03-09 14:33:01	9261490	5.28049e-10	2.81137e-11	3.20887e-07	1.81395e-11	2.18804e-09	3.42176e-10	5.62274e-14	3.19283e-07	7.5925e-10	0.0010717	1.76105e-07	5.68133e-05	0.00237799
238	2022-03-09 14:33:39	9299987	1.30418e-10	4.17304e-11	5.12142e-08	1.78342e-11	2.43087e-09	8.45109e-11	8.34608e-14	5.09581e-08	8.43512e-10	0.00165844	1.63783e-06	0.000349978	0.016553
239	2022-03-09 14:34:19	9339504	4.37739e-11	4.36244e-11	1.23523e-08	1.62959e-11	2.1548e-09	2.83655e-11	8.72488e-14	1.22905e-08	7.47716e-10	0.00230791	7.09886e-06	0.00132589	0.0608367
240	2022-03-09 14:34:58	9378502	5.07829e-11	2.91069e-11	6.68837e-09	1.44426e-11	1.91964e-09	3.29073e-11	5.82138e-14	6.65493e-09	6.66115e-10	0.0049448	8.74747e-06	0.00217021	0.100094
241	2022-03-09 14:35:40	9420619	3.26907e-11	4.07168e-11	5.72478e-09	1.26463e-11	1.73308e-09	2.11836e-11	8.14336e-14	5.69616e-09	6.01379e-10	0.00371892	1.42962e-05	0.00222015	0.105576
242	2022-03-09 14:36:21	9461717	3.27229e-11	4.58256e-11	5.46718e-09	1.06554e-11	1.58551e-09	2.12044e-11	9.16512e-14	5.43984e-09	5.50172e-10	0.00389799	1.68481e-05	0.00195877	0.101137
243	2022-03-09 14:37:02	9502814	2.73802e-11	4.05325e-11	5.30383e-09	9.92655e-12	1.49169e-09	1.77424e-11	8.1065e-14	5.27731e-09	5.17616e-10	0.00336201	1.5361e-05	0.00188099	0.0980834
244	2022-03-09 14:37:43	9543912	2.03712e-11	3.65294e-11	5.25197e-09	8.70105e-12	1.3909e-09	1.32005e-11	7.30588e-14	5.22571e-09	4.82642e-10	0.00252608	1.39806e-05	0.00166505	0.0923592
245	2022-03-09 14:38:25	9585009	4.39781e-11	3.03047e-11	5.19704e-09	8.07325e-12	1.30692e-09	2.84978e-11	6.06094e-14	5.17105e-09	4.53501e-10	0.00551102	1.17209e-05	0.00156124	0.0876999
246	2022-03-09 14:39:06	9626107	2.41122e-11	4.1802e-11	5.20316e-09	7.81202e-12	1.25832e-09	1.56247e-11	8.3604e-14	5.17714e-09	4.36637e-10	0.00301802	1.61487e-05	0.00150894	0.0843394
247	2022-03-09 14:39:47	9667204	2.75092e-11	3.77785e-11	5.08299e-09	7.2799e-12	1.22425e-09	1.7826e-11	7.5557e-14	5.05758e-09	4.24815e-10	0.00352461	1.49394e-05	0.00143941	0.0839957
248	2022-03-09 14:40:28	9708302	3.14007e-11	3.33147e-11	5.04356e-09	6.65102e-12	1.19341e-09	2.03477e-11	6.66294e-14	5.01834e-09	4.14113e-10	0.00405466	1.32772e-05	0.00132534	0.0825199
249	2022-03-09 14:41:09	9749399	2.53162e-11	4.34913e-11	5.07365e-09	6.3253e-12	1.15131e-09	1.64049e-11	8.69826e-14	5.04828e-09	3.99505e-10	0.0032496	1.72301e-05	0.00125296	0.0791367
250	2022-03-09 14:41:50	9790497	2.68319e-11	3.22397e-11	5.03567e-09	6.07697e-12	1.13463e-09	1.73871e-11	6.44794e-14	5.01049e-09	3.93717e-10	0.00347013	1.28689e-05	0.00121285	0.0785784
251	2022-03-09 14:42:31	9831594	9.97598e-12	2.75302e-11	5.02546e-09	5.94045e-12	1.11688e-09	6.46444e-12	5.50604e-14	5.00033e-09	3.87557e-10	0.0012928	1.10113e-05	0.00118801	0.0775063
252	2022-03-09 14:43:12	9872692	1.65549e-11	3.19428e-11	4.98327e-09	5.64805e-12	1.09011e-09	1.07276e-11	6.38856e-14	4.95835e-09	3.78268e-10	0.00216354	1.28844e-05	0.0011391	0.0762891
253	2022-03-09 14:43:53	9913789	2.15214e-11	5.23472e-11	5.01704e-09	5.69105e-12	1.07908e-09	1.39459e-11	1.04694e-13	4.99195e-09	3.74441e-10	0.00279367	2.09726e-05	0.00114004	0.0750088
254	2022-03-09 14:44:34	9954887	2.49399e-11	5.29513e-11	5.02578e-09	4.99875e-12	1.06864e-09	1.61611e-11	1.05903e-13	5.00065e-09	3.70818e-10	0.00323179	2.11778e-05	0.00099962	0.074154
255	2022-03-09 14:45:15	9995984	2.69609e-11	3.10316e-11	5.0258e-09	5.02347e-12	1.04501e-09	1.74707e-11	6.20632e-14	5.00067e-09	3.62618e-10	0.00349366	1.2411e-05	0.00100456	0.072514
256	2022-03-09 14:45:57	10037082	1.08682e-11	3.69287e-11	4.9762e-09	5.03852e-12	1.04596e-09	7.04259e-12	7.38574e-14	4.95132e-09	3.62948e-10	0.00142237	1.49167e-05	0.00101761	0.0733033
257	2022-03-09 14:46:38	10078179	1.61464e-11	2.42642e-11	5.45319e-09	4.84072e-12	1.02653e-09	1.04629e-11	4.85284e-14	5.42592e-09	3.56206e-10	0.00192831	8.9438e-06	0.000892147	0.0656489
258	2022-03-09 14:47:19	10119277	3.53674e-12	4.68801e-11	5.83047e-09	4.4419e-12	1.00205e-09	2.29181e-12	9.37602e-14	5.80132e-09	3.47711e-10	0.000395049	1.61619e-05	0.000765671	0.0599366
259	2022-03-09 14:48:00	10160374	3.61199e-12	3.11237e-11	5.04196e-08	4.4634e-12	1.13943e-09	2.34057e-12	6.22474e-14	5.01675e-08	3.95382e-10	4.66551e-05	1.24079e-06	8.89699e-05	0.00788124
260	2022-03-09 14:48:42	10202492	1.38997e-11	2.30356e-11	3.05837e-07	4.17637e-12	9.07029e-10	9.00701e-12	4.60712e-14	3.04308e-07	3.14739e-10	2.95983e-05	1.51397e-07	1.37242e-05	0.00103428
261	2022-03-09 14:49:22	10242009	-6.69723e-12	3.21987e-11	3.89328e-07	3.6679e-12	8.26286e-10	-4.33981e-12	6.43974e-14	3.87381e-07	2.86721e-10	-1.12029e-05	1.66238e-07	9.46845e-06	0.000740152
262	2022-03-09 14:50:00	10280507	1.51682e-11	3.20451e-11	4.02676e-07	8.83725e-11	3.1271e-09	9.82899e-12	6.40902e-14	4.00663e-07	1.0851e-09	2.45318e-05	1.59961e-07	0.000220566	0.00270827
263	2022-03-09 14:50:44	10324335	8.65625e-09	3.71334e-11	3.64513e-07	2.7445e-10	4.91153e-09	5.60925e-09	7.42668e-14	3.6269e-07	1.7043e-09	0.0154657	2.04766e-07	0.000756706	0.00469905
264	2022-03-09 14:51:17	10357753	1.18801e-08	3.32942e-11	3.59855e-07	2.88514e-10	3.4334e-09	7.6983e-09	6.65884e-14	3.58056e-07	1.19139e-09	0.0215003	1.85972e-07	0.00080578	0.00332739
265	2022-03-09 14:51:47	10387519	1.26708e-08	2.58307e-11	3.55287e-07	2.7935e-10	2.55864e-09	8.21068e-09	5.16614e-14	3.53511e-07	8.87848e-10	0.0232261	1.46138e-07	0.000790217	0.00251152
266	2022-03-09 14:52:17	10417285	1.26842e-08	3.20861e-11	3.98107e-07	2.3573e-10	2.02414e-09	8.21936e-09	6.41722e-14	3.96116e-07	7.02377e-10	0.0207499	1.62003e-07	0.000595103	0.00177316
267	2022-03-09 14:52:49	10449642	5.69409e-09	3.13285e-11	4.19428e-07	8.53916e-11	1.46564e-09	3.68977e-09	6.2657e-14	4.17331e-07	5.08577e-10	0.00884136	1.50137e-07	0.000204614	0.00121864
268	2022-03-09 14:53:21	10481509	1.7637e-09	2.19299e-11	4.66638e-07	3.61963e-11	1.1945e-09	1.14288e-09	4.38598e-14	4.64305e-07	4.14491e-10	0.00246148	9.44634e-08	7.79581e-05	0.000892714
269	2022-03-09 14:54:00	10520916	4.97713e-10	4.06144e-11	3.20438e-07	1.74623e-11	2.13129e-09	3.22518e-10	8.12288e-14	3.18836e-07	7.39558e-10	0.00101155	2.54767e-07	5.47689e-05	0.00231956
270	2022-03-09 14:54:39	10559414	1.41577e-10	4.40647e-11	5.12779e-08	1.87641e-11	2.404e-09	9.17419e-11	8.81294e-14	5.10215e-08	8.34188e-10	0.0017981	1.7273e-06	0.000367768	0.0163497
271	2022-03-09 14:55:18	10598932	6.69938e-11	3.28642e-11	1.2485e-08	1.7258e-11	2.11845e-09	4.3412e-11	6.57284e-14	1.24226e-08	7.35102e-10	0.0034946	5.29104e-06	0.00138924	0.0591747
272	2022-03-09 14:55:57	10637929	4.87941e-11	2.78169e-11	6.66307e-09	1.50414e-11	1.90429e-09	3.16186e-11	5.56338e-14	6.62975e-09	6.60789e-10	0.00476919	8.39153e-06	0.00226877	0.0996701
273	2022-03-09 14:56:40	10680047	3.72271e-11	2.70388e-11	5.73063e-09	1.30451e-11	1.69973e-09	2.41232e-11	5.40776e-14	5.70198e-09	5.89806e-10	0.00423067	9.48401e-06	0.00228782	0.103439
274	2022-03-09 14:57:21	10721144	3.78291e-11	4.0553e-11	5.48252e-09	1.13638e-11	1.57495e-09	2.45133e-11	8.1106e-14	5.45511e-09	5.46508e-10	0.00449363	1.48679e-05	0.00208315	0.100183
275	2022-03-09 14:58:02	10762242	2.66062e-11	2.78988e-11	5.37456e-09	9.81153e-12	1.47692e-09	1.72408e-11	5.57976e-14	5.34769e-09	5.12491e-10	0.00322398	1.0434e-05	0.00183472	0.0958342
276	2022-03-09 14:58:43	10803339	2.95624e-11	1.64218e-11	5.30839e-09	9.32993e-12	1.39222e-09	1.91564e-11	3.28436e-14	5.28185e-09	4.831e-10	0.00362684	6.2182e-06	0.00176641	0.0914643
277	2022-03-09 14:59:24	10844437	2.52517e-11	2.68442e-11	5.38417e-09	8.03455e-12	1.32611e-09	1.63631e-11	5.36884e-14	5.35725e-09	4.6016e-10	0.00305439	1.00216e-05	0.00149975	0.0858949
278	2022-03-09 15:00:05	10885534	2.59504e-11	3.87409e-11	5.51681e-09	7.43362e-12	1.26469e-09	1.68159e-11	7.74818e-14	5.48923e-09	4.38847e-10	0.00306343	1.41153e-05	0.00135422	0.0799471
279	2022-03-09 15:00:46	10926632	2.68212e-11	3.72972e-11	5.13973e-09	7.15197e-12	1.21538e-09	1.73801e-11	7.45944e-14	5.11403e-09	4.21737e-10	0.00339852	1.45862e-05	0.0013985	0.0824666
280	2022-03-09 15:01:27	10967729	3.44644e-11	3.18609e-11	5.07857e-09	6.63597e-12	1.18634e-09	2.23329e-11	6.37218e-14	5.05318e-09	4.1166e-10	0.00441958	1.26102e-05	0.00131323	0.0814656
281	2022-03-09 15:02:08	11008827	2.72619e-11	4.10956e-11	5.07479e-09	6.5962e-12	1.14926e-09	1.76657e-11	8.21912e-14	5.04942e-09	3.98793e-10	0.00349857	1.62774e-05	0.00130633	0.0789781
282	2022-03-09 15:02:49	11049924	2.56279e-11	3.48094e-11	5.13522e-09	6.20705e-12	1.12011e-09	1.66069e-11	6.96188e-14	5.10954e-09	3.88678e-10	0.00325017	1.36252e-05	0.0012148	0.0760691
283	2022-03-09 15:03:31	11091022	1.74794e-11	4.08294e-11	4.98673e-09	5.98345e-12	1.10679e-09	1.13267e-11	8.16588e-14	4.9618e-09	3.84056e-10	0.00228277	1.64575e-05	0.0012059	0.0774026
284	2022-03-09 15:04:12	11132119	2.90034e-11	3.35604e-11	4.99548e-09	5.7104e-12	1.06708e-09	1.87942e-11	6.71208e-14	4.9705e-09	3.70277e-10	0.00378115	1.35038e-05	0.00114886	0.0744948
285	2022-03-09 15:04:52	11172177	9.47073e-12	2.1674e-11	4.94378e-09	5.35027e-12	1.06661e-09	6.13703e-12	4.3348e-14	4.91906e-09	3.70114e-10	0.0012476	8.81225e-06	0.00108766	0.0752407
286	2022-03-09 15:05:33	11213274	2.16719e-11	4.0901e-11	4.95773e-09	5.4868e-12	1.04105e-09	1.40434e-11	8.1802e-14	4.93294e-09	3.61244e-10	0.00284686	1.65828e-05	0.00111228	0.073231
287	2022-03-09 15:06:14	11254372	1.82534e-11	3.06528e-11	4.91889e-09	5.6287e-12	1.02269e-09	1.18282e-11	6.13056e-14	4.8943e-09	3.54873e-10	0.00241673	1.25259e-05	0.00115005	0.0725076
288	2022-03-09 15:06:55	11295469	7.34223e-12	3.96725e-11	4.91627e-09	5.30942e-12	1.00734e-09	4.75777e-12	7.9345e-14	4.89169e-09	3.49547e-10	0.000972622	1.62204e-05	0.0010854	0.0714573
289	2022-03-09 15:07:36	11336567	1.59314e-11	3.50142e-11	5.39251e-09	4.9493e-12	9.88379e-10	1.03235e-11	7.00284e-14	5.36555e-09	3.42968e-10	0.00192404	1.30515e-05	0.000922422	0.0639203
290	2022-03-09 15:08:17	11377664	1.11799e-11	2.71309e-11	5.75139e-09	4.68485e-12	9.91143e-10	7.24458e-12	5.42618e-14	5.72263e-09	3.43927e-10	0.00126595	9.48196e-06	0.000818653	0.0600994
291	2022-03-09 15:08:58	11418762	2.28007e-11	4.17713e-11	3.20158e-08	4.49027e-12	1.09167e-09	1.47749e-11	8.35426e-14	3.18557e-08	3.78809e-10	0.000463805	2.62253e-06	0.000140956	0.0118914
292	2022-03-09 15:09:39	11459839	1.20507e-11	2.5114e-11	3.0718e-07	4.1882e-12	9.17471e-10	7.80885e-12	5.0228e-14	3.05644e-07	3.18362e-10	2.55488e-05	1.64335e-07	1.37029e-05	0.00104161
293	2022-03-09 15:10:19	11499357	2.71974e-12	1.41388e-11	3.89238e-07	3.96352e-12	8.13807e-10	1.76239e-12	2.82776e-14	3.87292e-07	2.82391e-10	4.55055e-06	7.30137e-08	1.02339e-05	0.000729143
294	2022-03-09 15:10:57	11537854	6.08449e-12	3.2209e-11	4.04826e-07	6.77723e-11	2.47046e-09	3.94275e-12	6.4418e-14	4.02802e-07	8.5725e-10	9.78831e-06	1.59925e-07	0.000168252	0.00212822
295	2022-03-09 15:11:41	11581683	8.27449e-09	3.02126e-11	3.63528e-07	2.66185e-10	4.75832e-09	5.36187e-09	6.04252e-14	3.6171e-07	1.65114e-09	0.0148237	1.67054e-07	0.000735906	0.0045648
296	2022-03-09 15:12:15	11615100	1.17201e-08	3.19734e-11	3.60751e-07	2.8906e-10	3.46424e-09	7.59462e-09	6.39468e-14	3.58947e-07	1.20209e-09	0.0211581	1.78151e-07	0.000805299	0.00334894
297	2022-03-09 15:12:44	11644867	1.25929e-08	2.94242e-11	3.52868e-07	2.80626e-10	2.59824e-09	8.1602e-09	5.88484e-14	3.51104e-07	9.01589e-10	0.0232416	1.6761e-07	0.000799268	0.00256787
298	2022-03-09 15:13:14	11674634	1.27319e-08	3.51063e-11	3.48388e-07	2.00274e-10	1.78563e-09	8.25027e-09	7.02126e-14	3.46646e-07	6.19614e-10	0.0238003	2.02548e-07	0.000577748	0.00178745
299	2022-03-09 15:13:46	11706990	1.74955e-09	3.62018e-11	6.16444e-08	3.57512e-11	1.22281e-09	1.13371e-09	7.24036e-14	6.13362e-08	4.24315e-10	0.0184835	1.18044e-06	0.000582873	0.00691786
300	2022-03-09 15:14:27	11747420	7.36674e-10	4.6532e-11	5.02998e-08	2.78779e-11	1.18658e-09	4.77365e-10	9.3064e-14	5.00483e-08	4.11743e-10	0.00953808	1.85948e-06	0.00055702	0.00822692
301	2022-03-09 15:15:06	11786417	6.28347e-10	5.3453e-11	5.22376e-08	2.56548e-11	1.18634e-09	4.07169e-10	1.06906e-13	5.19764e-08	4.1166e-10	0.00783372	2.05682e-06	0.000493585	0.00792013
302	2022-03-09 15:15:45	11825414	5.73952e-10	3.45534e-11	5.59116e-08	2.34264e-11	1.18994e-09	3.71921e-10	6.91068e-14	5.5632e-08	4.12909e-10	0.00668537	1.24221e-06	0.000421095	0.00742215
303	2022-03-09 15:16:24	11864412	4.77589e-10	4.25494e-11	6.20481e-08	2.37016e-11	1.18262e-09	3.09478e-10	8.50988e-14	6.17379e-08	4.10369e-10	0.00501277	1.37839e-06	0.000383907	0.00664696
304	2022-03-09 15:17:03	11903409	4.83254e-10	3.77375e-11	6.86565e-08	2.09743e-11	1.16126e-09	3.13149e-10	7.5475e-14	6.83132e-08	4.02957e-10	0.00458401	1.10484e-06	0.000307031	0.00589867
305	2022-03-09 15:17:42	11942407	3.98136e-10	2.59126e-11	7.12908e-08	1.83986e-11	1.15646e-09	2.57992e-10	5.18252e-14	7.09343e-08	4.01292e-10	0.00363706	7.30608e-07	0.000259375	0.00565723
306	2022-03-09 15:18:21	11981404	2.96559e-10	2.77451e-11	6.73972e-08	1.56014e-11	1.13847e-09	1.9217e-10	5.54902e-14	6.70602e-08	3.95049e-10	0.00286564	8.27468e-07	0.000232648	0.00589096

## Sheet: Analysis thrgh Conc vector meth
Index	Time	ms	Ethylene mbar	Carbon monoxide mbar	Argon mbar	Ethylene oxide mbar	Carbon dioxide mbar	Corrected Et	Corrected CO	Corrected Ar	Corrected CO2	Et (ć)	CO (ć)	EtO (ć)	CO2 (ć)		Conver	Select	Yield
1	2022-03-09 11:58:55	15189	5.72114e-11	5.84901e-11	5.32357e-09	1.35976e-11	1.44837e-09	3.7073e-11	1.1698e-13	5.29695e-09	5.02584e-10	0.00699893	2.20844e-05	0.00256706	0.0948818		87.725	5.13217	1.71902
2	2022-03-09 11:59:47	67767	3.78829e-11	4.67675e-11	6.45741e-09	9.18803e-12	1.57135e-09	2.45481e-11	9.3535e-14	6.42512e-09	5.45258e-10	0.00382065	1.45577e-05	0.00143002	0.0848635		91.9885	3.25974	1.09059
3	2022-03-09 12:00:28	108864	4.01296e-11	5.22756e-11	3.07717e-07	6.6994e-12	1.22857e-09	2.6004e-11	1.04551e-13	3.06178e-07	4.26314e-10	8.49308e-05	3.41471e-07	2.18807e-05	0.00139237		89.4255	3.04645	1.00663
4	2022-03-09 12:01:11	151502	1.78557e-11	3.81163e-11	4.12082e-07	5.29115e-12	1.00157e-09	1.15705e-11	7.62326e-14	4.10022e-07	3.47545e-10	2.82192e-05	1.85923e-07	1.29046e-05	0.000847626		93.9317	2.95427	0.992849
5	2022-03-09 12:01:49	189999	2.03282e-11	3.38061e-11	4.23997e-07	5.86552e-11	3.34354e-09	1.31727e-11	6.76122e-14	4.21877e-07	1.16021e-09	3.1224e-05	1.60265e-07	0.000139034	0.00275011		97.9795	9.18219	3.345
6	2022-03-09 12:02:33	233828	9.79406e-09	6.8595e-11	4.01601e-07	3.33931e-10	1.54094e-08	6.34655e-09	1.3719e-13	3.99593e-07	5.34706e-09	0.0158825	3.43324e-07	0.000835678	0.0133813		32.1521	11.1032	2.32426
7	2022-03-09 12:03:07	267275	1.32607e-08	5.47737e-11	3.97033e-07	3.99516e-10	1.09865e-08	8.59293e-09	1.09547e-13	3.95048e-07	3.81232e-09	0.0217516	2.77302e-07	0.00101131	0.00965026		21.1561	17.3271	2.79158
8	2022-03-09 12:03:37	297003	1.43667e-08	6.0251e-11	3.85476e-07	3.96414e-10	7.42979e-09	9.30962e-09	1.20502e-13	3.83549e-07	2.57814e-09	0.0242723	3.14177e-07	0.00103354	0.0067218		15.3299	23.5185	3.0084
9	2022-03-09 12:04:06	326730	1.47214e-08	6.2657e-11	3.81176e-07	3.77056e-10	5.67351e-09	9.53947e-09	1.25314e-13	3.7927e-07	1.96871e-09	0.0251522	3.30408e-07	0.000994162	0.00519078		12.4895	27.6947	3.01824
10	2022-03-09 12:04:35	355867	8.17299e-09	4.97775e-11	3.47134e-07	1.71249e-10	3.14989e-09	5.2961e-09	9.9555e-14	3.45398e-07	1.09301e-09	0.0153333	2.88232e-07	0.000495801	0.0031645		11.9358	23.8573	2.46911
11	2022-03-09 12:05:07	387734	2.93131e-09	3.53828e-11	3.58063e-07	8.57581e-11	2.28894e-09	1.89949e-09	7.07656e-14	3.56273e-07	7.94262e-10	0.00533156	1.98628e-07	0.000240709	0.00222937		20.2704	17.7581	2.77452
12	2022-03-09 12:05:39	419602	1.17829e-09	2.59126e-11	3.84849e-07	4.7028e-11	1.87981e-09	7.63532e-10	5.18252e-14	3.82925e-07	6.52294e-10	0.00199395	1.3534e-07	0.000122813	0.00170345		32.831	12.6013	2.69966
13	2022-03-09 12:06:19	459010	4.07832e-10	3.67444e-11	3.01537e-07	2.56978e-11	2.31689e-09	2.64275e-10	7.34888e-14	3.00029e-07	8.03961e-10	0.000880831	2.44939e-07	8.5651e-05	0.00267961		61.8094	6.00816	1.74785
14	2022-03-09 12:06:57	497507	1.30827e-10	3.87715e-11	6.61376e-08	1.92468e-11	2.59656e-09	8.47759e-11	7.7543e-14	6.58069e-08	9.01006e-10	0.00128825	1.17834e-06	0.000292474	0.0136917		84.7131	4.09691	1.34
15	2022-03-09 12:07:37	537024	7.76901e-11	2.3353e-11	1.82189e-08	1.71462e-11	2.34449e-09	5.03432e-11	4.6706e-14	1.81278e-08	8.13538e-10	0.00277713	2.57648e-06	0.000945851	0.0448779		89.3854	4.0445	1.34938
16	2022-03-09 12:08:16	576022	3.30024e-11	4.31432e-11	8.65817e-09	1.50478e-11	2.11629e-09	2.13856e-11	8.62864e-14	8.61488e-09	7.34353e-10	0.0024824	1.0016e-05	0.00174672	0.0852424		94.702	3.93646	1.34001
17	2022-03-09 12:08:55	615019	4.73644e-11	4.64091e-11	6.53502e-09	1.36815e-11	1.91209e-09	3.06921e-11	9.28182e-14	6.50234e-09	6.63495e-10	0.00472016	1.42746e-05	0.00210409	0.102039		91.8408	3.96019	1.3335
18	2022-03-09 12:09:37	657137	2.29512e-11	4.95215e-11	6.02053e-09	1.26796e-11	1.75911e-09	1.48724e-11	9.9043e-14	5.99043e-09	6.10411e-10	0.00248269	1.65335e-05	0.00211664	0.101898		95.5312	3.98811	1.36261
19	2022-03-09 12:10:18	698234	2.71437e-11	3.85872e-11	5.89089e-09	1.18658e-11	1.63469e-09	1.75891e-11	7.71744e-14	5.86144e-09	5.67237e-10	0.00300082	1.31665e-05	0.00202438	0.0967745		94.3825	4.01519	1.36627
20	2022-03-09 12:10:59	739332	2.50474e-11	3.54544e-11	5.74876e-09	1.10875e-11	1.57147e-09	1.62307e-11	7.09088e-14	5.72002e-09	5.453e-10	0.00283753	1.23966e-05	0.00193837	0.0953319		94.5898	3.90717	1.32909
21	2022-03-09 12:11:40	780429	2.51227e-11	3.57923e-11	5.69654e-09	1.06747e-11	1.49409e-09	1.62795e-11	7.15846e-14	5.66806e-09	5.18449e-10	0.00287215	1.26295e-05	0.00188331	0.0914686		94.3121	3.95454	1.34444
22	2022-03-09 12:12:21	821527	4.82029e-11	5.10572e-11	6.24088e-09	1.07543e-11	1.56847e-09	3.12355e-11	1.02114e-13	6.20968e-09	5.44259e-10	0.00503013	1.64444e-05	0.00173186	0.0876469		90.0578	3.80098	1.26868
23	2022-03-09 12:13:02	862624	1.75439e-11	5.06375e-11	6.25709e-09	1.00587e-11	1.50572e-09	1.13684e-11	1.01275e-13	6.2258e-09	5.22485e-10	0.00182602	1.6267e-05	0.00161565	0.0839225		95.9789	3.70689	1.26501
24	2022-03-09 12:13:43	903722	2.03174e-11	2.75199e-11	6.19641e-09	9.7094e-12	1.46769e-09	1.31657e-11	5.50398e-14	6.16543e-09	5.09288e-10	0.0021354	8.92717e-06	0.00157481	0.0826039		95.2564	3.6725	1.2494
25	2022-03-09 12:14:24	944819	2.69824e-11	4.82725e-11	6.17011e-09	9.41915e-12	1.41706e-09	1.74846e-11	9.6545e-14	6.13926e-09	4.9172e-10	0.002848	1.57258e-05	0.00153425	0.0800943		93.591	3.68905	1.24738
26	2022-03-09 12:15:05	985917	3.04009e-11	4.55082e-11	6.13946e-09	8.98378e-12	1.38442e-09	1.96998e-11	9.10164e-14	6.10876e-09	4.80394e-10	0.00322484	1.48993e-05	0.00147064	0.0786401		92.6746	3.60467	1.21347
27	2022-03-09 12:15:47	1027014	2.30049e-11	4.92451e-11	6.11673e-09	8.8107e-12	1.36703e-09	1.49072e-11	9.84902e-14	6.08615e-09	4.74359e-10	0.00244936	1.61827e-05	0.00144766	0.0779408		94.2873	3.58101	1.21277
28	2022-03-09 12:16:28	1068112	1.78879e-11	4.62966e-11	6.04875e-09	8.32695e-12	1.33295e-09	1.15914e-11	9.25932e-14	6.01851e-09	4.62534e-10	0.00192595	1.53847e-05	0.00138356	0.0768519		95.3862	3.47477	1.18039
29	2022-03-09 12:17:09	1109209	3.60984e-11	4.39315e-11	6.06898e-09	8.36135e-12	1.30464e-09	2.33918e-11	8.7863e-14	6.03864e-09	4.5271e-10	0.00387368	1.45501e-05	0.00138464	0.0749689		90.9388	3.56165	1.19023
30	2022-03-09 12:17:50	1150307	1.76299e-11	4.29077e-11	6.07707e-09	8.20547e-12	1.30308e-09	1.14242e-11	8.58154e-14	6.04668e-09	4.52169e-10	0.00188933	1.41921e-05	0.00135702	0.0747796		95.3514	3.50163	1.18968
31	2022-03-09 12:18:31	1191404	1.17819e-11	3.74713e-11	6.0737e-09	7.89695e-12	1.2846e-09	7.63467e-12	7.49426e-14	6.04333e-09	4.45756e-10	0.00126332	1.24009e-05	0.00130672	0.07376		96.7982	3.42137	1.16766
32	2022-03-09 12:19:12	1232502	2.54344e-11	5.1733e-11	6.58888e-09	7.99155e-12	1.27741e-09	1.64815e-11	1.03466e-13	6.55594e-09	4.43261e-10	0.00251398	1.5782e-05	0.00121898	0.0676122		93.3044	3.47952	1.17277
33	2022-03-09 12:19:53	1273599	2.80574e-11	5.07091e-11	5.59148e-09	7.4992e-12	1.24525e-09	1.81812e-11	1.01418e-13	5.56352e-09	4.32102e-10	0.00326793	1.82291e-05	0.00134792	0.0776669		92.4803	3.35383	1.12536
34	2022-03-09 12:20:34	1314697	1.58132e-11	4.3952e-11	6.0014e-09	7.21647e-12	1.23913e-09	1.0247e-11	8.7904e-14	5.97139e-09	4.29978e-10	0.00171601	1.47209e-05	0.00120851	0.0720063		95.5926	3.24701	1.10132
35	2022-03-09 12:21:15	1355794	2.92937e-11	4.58666e-11	2.05773e-07	6.71552e-12	1.21069e-09	1.89823e-11	9.17332e-14	2.04744e-07	4.20109e-10	9.27124e-05	4.48038e-07	3.27996e-05	0.00205188		91.9498	3.09733	1.03444
36	2022-03-09 12:21:58	1398434	1.11369e-11	4.05837e-11	3.5242e-07	6.20167e-12	1.04332e-09	7.21671e-12	8.11674e-14	3.50658e-07	3.62032e-10	2.05805e-05	2.31472e-07	1.76858e-05	0.00103244		96.2891	3.31183	1.12695
37	2022-03-09 12:22:36	1436932	2.46174e-11	2.78169e-11	3.92016e-07	5.52765e-12	9.59579e-10	1.59521e-11	5.56338e-14	3.90056e-07	3.32974e-10	4.08969e-05	1.4263e-07	1.41714e-05	0.000853657		91.5146	3.21296	1.07241
38	2022-03-09 12:23:15	1475429	3.04938e-09	4.38701e-11	3.65141e-07	2.26807e-10	6.59974e-09	1.976e-09	8.77402e-14	3.63315e-07	2.29011e-09	0.0054388	2.41499e-07	0.00062427	0.00630337		40.978	16.5323	4.19143
39	2022-03-09 12:24:00	1520809	1.17671e-08	5.39137e-11	3.76876e-07	3.36108e-10	5.24531e-09	7.62508e-09	1.07827e-13	3.74992e-07	1.82012e-09	0.020334	2.87546e-07	0.000896308	0.00485377		14.0478	26.9701	3.24575
40	2022-03-09 12:24:30	1550575	1.33205e-08	4.36347e-11	3.69709e-07	3.32327e-10	3.81433e-09	8.63168e-09	8.72694e-14	3.6786e-07	1.32357e-09	0.0234646	2.37235e-07	0.000903405	0.00359803		10.328	33.428	3.13011
41	2022-03-09 12:25:00	1580342	1.38633e-08	3.48606e-11	3.68634e-07	3.23237e-10	2.97196e-09	8.98342e-09	6.97212e-14	3.66791e-07	1.03127e-09	0.0244919	1.90084e-07	0.000881257	0.0028116		8.54082	38.5307	3.06957
42	2022-03-09 12:25:30	1610109	1.05793e-08	3.29358e-11	3.32263e-07	1.70865e-10	2.10393e-09	6.85539e-09	6.58716e-14	3.30602e-07	7.30064e-10	0.0207361	1.99248e-07	0.00051683	0.00220829		7.2508	31.882	2.14911
43	2022-03-09 12:26:02	1642466	3.60814e-09	3.58639e-11	3.36026e-07	7.92168e-11	1.68281e-09	2.33807e-09	7.17278e-14	3.34346e-07	5.83935e-10	0.00699298	2.14532e-07	0.000236931	0.0017465		13.7017	21.3396	2.46473
44	2022-03-09 12:26:34	1674332	1.44273e-09	3.84337e-11	3.6747e-07	4.08779e-11	1.48136e-09	9.34889e-10	7.68674e-14	3.65633e-07	5.14032e-10	0.00255691	2.10231e-07	0.0001118	0.00140587		24.1667	13.7205	2.39616
45	2022-03-09 12:27:13	1713740	5.1086e-10	2.10802e-11	3.60662e-07	2.09485e-11	1.68917e-09	3.31037e-10	4.21604e-14	3.58859e-07	5.86142e-10	0.000922473	1.17485e-07	5.83753e-05	0.00163335		48.6826	6.67063	1.73089
46	2022-03-09 12:27:52	1752237	1.95681e-10	3.1912e-11	9.80933e-08	1.68947e-11	2.43555e-09	1.26801e-10	6.3824e-14	9.76028e-08	8.45136e-10	0.00129916	6.53915e-07	0.000173096	0.00865893		77.6086	3.84412	1.21149
47	2022-03-09 12:28:30	1790734	8.30006e-11	5.26749e-11	2.52221e-08	1.56735e-11	2.28989e-09	5.37844e-11	1.0535e-13	2.5096e-08	7.94592e-10	0.00214315	4.19787e-06	0.000624542	0.0316621		88.4782	3.79483	1.25818
48	2022-03-09 12:29:10	1830252	4.53326e-11	3.77375e-11	1.05769e-08	1.37084e-11	2.07958e-09	2.93755e-11	7.5475e-14	1.0524e-08	7.21614e-10	0.00279128	7.17169e-06	0.00130258	0.0685683		92.7275	3.65993	1.23295
49	2022-03-09 12:29:49	1869249	3.26907e-11	4.8508e-11	7.28335e-09	1.23076e-11	1.88497e-09	2.11836e-11	9.7016e-14	7.24693e-09	6.54085e-10	0.00292311	1.33872e-05	0.00169832	0.0902567		94.1252	3.6263	1.22786
50	2022-03-09 12:30:31	1911367	3.37656e-11	3.8751e-11	6.59267e-09	1.12337e-11	1.74616e-09	2.18801e-11	7.7502e-14	6.55971e-09	6.05918e-10	0.00333553	1.18149e-05	0.00171253	0.0923696		93.4902	3.57498	1.20689
51	2022-03-09 12:31:12	1952464	2.52839e-11	4.60815e-11	6.34779e-09	1.03167e-11	1.66014e-09	1.6384e-11	9.2163e-14	6.31605e-09	5.76069e-10	0.00259402	1.45919e-05	0.00163341	0.0912071		94.7951	3.45737	1.17164
52	2022-03-09 12:31:53	1993562	4.36556e-11	3.1523e-11	6.24417e-09	9.53955e-12	1.54447e-09	2.82888e-11	6.3046e-14	6.21295e-09	5.35931e-10	0.0045532	1.01475e-05	0.00153543	0.0862603		90.75	3.43722	1.14628
53	2022-03-09 12:32:34	2034659	3.86784e-11	4.42591e-11	6.17608e-09	8.93325e-12	1.47033e-09	2.50636e-11	8.85182e-14	6.1452e-09	5.10205e-10	0.00407857	1.44044e-05	0.0014537	0.0830249		91.3318	3.38278	1.1302
54	2022-03-09 12:33:15	2075757	2.35424e-11	3.48709e-11	6.14317e-09	8.68278e-12	1.41238e-09	1.52555e-11	6.97418e-14	6.11245e-09	4.90096e-10	0.0024958	1.14098e-05	0.00142051	0.0801799		94.3293	3.42158	1.15703
55	2022-03-09 12:33:56	2116854	5.27931e-11	4.73715e-11	6.11904e-09	7.9593e-12	1.37039e-09	3.42099e-11	9.4743e-14	6.08844e-09	4.75525e-10	0.00561883	1.55611e-05	0.00130728	0.0781029		87.7813	3.23852	1.06472
56	2022-03-09 12:34:37	2157952	2.32522e-11	4.00513e-11	6.09105e-09	7.81847e-12	1.34111e-09	1.50674e-11	8.01026e-14	6.06059e-09	4.65365e-10	0.00248613	1.3217e-05	0.00129005	0.0767854		94.1053	3.25037	1.09632
57	2022-03-09 12:35:19	2199049	3.15189e-11	5.17637e-11	6.03951e-09	7.2455e-12	1.29372e-09	2.04242e-11	1.03527e-13	6.00931e-09	4.48921e-10	0.00339877	1.72278e-05	0.00120571	0.0747042		91.901	3.12633	1.04423
58	2022-03-09 12:36:00	2240147	2.86594e-11	3.42566e-11	6.01822e-09	7.04662e-12	1.29372e-09	1.85713e-11	6.85132e-14	5.98813e-09	4.48921e-10	0.00310135	1.14415e-05	0.00117676	0.0749685		92.5748	3.04335	1.01832
59	2022-03-09 12:36:41	2281244	3.00032e-11	2.6967e-11	6.03593e-09	6.44032e-12	1.27069e-09	1.94421e-11	5.3934e-14	6.00575e-09	4.40929e-10	0.00323724	8.98039e-06	0.00107236	0.0734179		92.1087	2.838	0.945905
60	2022-03-09 12:37:22	2322342	3.34217e-11	4.06758e-11	5.80618e-09	6.75637e-12	1.22665e-09	2.16573e-11	8.13516e-14	5.77715e-09	4.25648e-10	0.00374878	1.40816e-05	0.0011695	0.0736778		91.0239	3.07638	1.02343
61	2022-03-09 12:38:03	2363439	1.76729e-11	3.35706e-11	6.0402e-09	6.21887e-12	1.24393e-09	1.1452e-11	6.71412e-14	6.01e-09	4.31644e-10	0.0019055	1.11716e-05	0.00103475	0.0718209		95.096	2.80036	0.943753
62	2022-03-09 12:38:44	2404537	4.24301e-11	4.63887e-11	6.05303e-09	6.1877e-12	1.21454e-09	2.74947e-11	9.27774e-14	6.02276e-09	4.21445e-10	0.00456513	1.54045e-05	0.00102739	0.0699754		88.7525	2.85204	0.937944
63	2022-03-09 12:39:25	2445634	1.71032e-11	3.33453e-11	5.321e-09	6.22532e-12	1.19474e-09	1.10829e-11	6.66906e-14	5.2944e-09	4.14575e-10	0.00209332	1.25965e-05	0.00117583	0.0783045		95.0661	2.91521	0.983496
64	2022-03-09 12:40:06	2486732	1.35772e-11	4.66856e-11	7.06073e-09	6.02215e-12	1.1795e-09	8.79803e-12	9.33712e-14	7.02543e-09	4.09286e-10	0.00125231	1.32905e-05	0.000857194	0.0582579		95.992	2.858	0.966987
65	2022-03-09 12:40:47	2527829	1.29107e-11	3.35809e-11	5.47863e-09	5.85337e-12	1.16931e-09	8.36613e-12	6.71618e-14	5.45124e-09	4.05751e-10	0.00153472	1.23205e-05	0.00107377	0.0744328		96.1469	2.80385	0.948643
66	2022-03-09 12:41:28	2568927	2.06399e-11	3.77068e-11	5.93371e-09	5.977e-12	1.14963e-09	1.33747e-11	7.54136e-14	5.90404e-09	3.98922e-10	0.00226534	1.27732e-05	0.00101236	0.0675675		93.8887	2.90886	0.976962
67	2022-03-09 12:42:10	2610024	1.59314e-11	4.04813e-11	1.69402e-07	5.36102e-12	1.19006e-09	1.03235e-11	8.09626e-14	1.68555e-07	4.12951e-10	6.12474e-05	4.80333e-07	3.18058e-05	0.00244995		95.3539	2.53025	0.851239
68	2022-03-09 12:42:52	2652662	1.09004e-11	2.95983e-11	3.42655e-07	5.2202e-12	1.01045e-09	7.06346e-12	5.91966e-14	3.40942e-07	3.50626e-10	2.07175e-05	1.73627e-07	1.53111e-05	0.0010284		96.2354	2.89107	0.97934
69	2022-03-09 12:43:31	2691159	1.69849e-12	1.42718e-11	3.9757e-07	4.50855e-12	9.16629e-10	1.10062e-12	2.85436e-14	3.95582e-07	3.1807e-10	2.78228e-06	7.21559e-08	1.13973e-05	0.000804056		99.3316	2.75655	0.942777
70	2022-03-09 12:44:09	2729657	7.34825e-10	4.55082e-11	3.92105e-07	1.67589e-10	5.07458e-09	4.76167e-10	9.10164e-14	3.90144e-07	1.76088e-09	0.00122049	2.33289e-07	0.000429556	0.0045134		68.7604	15.9902	5.3757
71	2022-03-09 12:44:55	2775036	1.08016e-08	4.4638e-11	3.69709e-07	3.0948e-10	4.94476e-09	6.99944e-09	8.9276e-14	3.6786e-07	1.71583e-09	0.0190274	2.4269e-07	0.000841297	0.00466435		14.2948	26.5093	3.23277
72	2022-03-09 12:45:24	2804802	1.26076e-08	2.63016e-11	3.62812e-07	3.14431e-10	3.57462e-09	8.16972e-09	5.26032e-14	3.60998e-07	1.24039e-09	0.0226309	1.45716e-07	0.000871005	0.00343601		10.266	33.6414	3.1348
73	2022-03-09 12:45:54	2834569	1.32352e-08	3.37651e-11	3.60483e-07	3.05665e-10	2.77436e-09	8.57641e-09	6.75302e-14	3.58681e-07	9.62703e-10	0.023911	1.88274e-07	0.000852193	0.00268401		8.40555	38.8368	3.0504
74	2022-03-09 12:46:24	2864335	1.37149e-08	3.81982e-11	3.60572e-07	1.99154e-10	2.07321e-09	8.88726e-09	7.63964e-14	3.58769e-07	7.19404e-10	0.0247715	2.1294e-07	0.000555103	0.0020052		5.91663	35.6336	1.99825
75	2022-03-09 12:46:56	2896692	4.50484e-09	3.95496e-11	3.82162e-07	8.71599e-11	1.63482e-09	2.91914e-09	7.90992e-14	3.80251e-07	5.67283e-10	0.00767686	2.08018e-07	0.000229217	0.00149186		11.2718	23.5033	2.31187
76	2022-03-09 12:47:28	2928559	1.43469e-09	3.9652e-11	3.86999e-07	3.99728e-11	1.35419e-09	9.29679e-10	7.9304e-14	3.85064e-07	4.69904e-10	0.00241435	2.0595e-07	0.000103808	0.00122033		22.8254	14.5374	2.44546
77	2022-03-09 12:48:07	2967966	5.50517e-10	2.63937e-11	3.19991e-07	1.81051e-11	2.01035e-09	3.56735e-10	5.27874e-14	3.18391e-07	6.97591e-10	0.00112043	1.65794e-07	5.68644e-05	0.00219099		50.7042	4.93425	1.29032
78	2022-03-09 12:48:46	3006464	1.56605e-10	2.70183e-11	6.75753e-08	1.76224e-11	2.64083e-09	1.0148e-10	5.40366e-14	6.72374e-08	9.16368e-10	0.00150928	8.03669e-07	0.000262092	0.0136288		82.422	3.70348	1.19388
79	2022-03-09 12:49:25	3045982	7.46693e-11	3.45534e-11	1.46927e-08	1.61035e-11	2.35109e-09	4.83857e-11	6.91068e-14	1.46192e-08	8.15828e-10	0.00330973	4.72711e-06	0.00110153	0.0558051		89.7583	3.79753	1.26584
80	2022-03-09 12:50:04	3084979	6.04901e-11	3.0704e-11	6.93029e-09	1.4248e-11	2.05366e-09	3.91976e-11	6.1408e-14	6.89564e-09	7.1262e-10	0.0056844	8.90534e-06	0.00206623	0.103344		90.4346	3.84469	1.28574
81	2022-03-09 12:50:47	3127097	3.72916e-11	3.46149e-11	5.80705e-09	1.22958e-11	1.85917e-09	2.4165e-11	6.92298e-14	5.77801e-09	6.45132e-10	0.00418222	1.19816e-05	0.00212803	0.111653		93.27	3.67152	1.23962
82	2022-03-09 12:51:28	3168194	3.30777e-11	3.35604e-11	5.50918e-09	1.11466e-11	1.71616e-09	2.14343e-11	6.71208e-14	5.48163e-09	5.95508e-10	0.00391021	1.22447e-05	0.00203344	0.108637		93.512	3.60809	1.21857
83	2022-03-09 12:52:09	3209292	3.94631e-11	3.68366e-11	5.39457e-09	1.03458e-11	1.59534e-09	2.55721e-11	7.36732e-14	5.3676e-09	5.53583e-10	0.00476416	1.37255e-05	0.00192745	0.103134		91.8234	3.60262	1.20864
84	2022-03-09 12:52:50	3250389	2.40584e-11	4.7648e-11	5.30609e-09	9.69865e-12	1.53044e-09	1.55898e-11	9.5296e-14	5.27956e-09	5.31063e-10	0.00295287	1.805e-05	0.00183702	0.100588		94.6402	3.52322	1.19407
85	2022-03-09 12:53:31	3291487	2.53162e-11	4.83339e-11	5.32432e-09	8.74943e-12	1.44105e-09	1.64049e-11	9.66678e-14	5.2977e-09	5.00044e-10	0.00309661	1.82471e-05	0.00165155	0.094389		94.0395	3.38051	1.14145
86	2022-03-09 12:54:12	3332584	3.61199e-11	4.49553e-11	5.22263e-09	8.213e-12	1.38874e-09	2.34057e-11	8.99106e-14	5.19652e-09	4.81893e-10	0.00450411	1.73021e-05	0.00158048	0.0927338		91.4142	3.29569	1.10051
87	2022-03-09 12:54:53	3373682	1.05349e-11	2.67009e-11	5.1393e-09	7.55617e-12	1.32539e-09	6.82662e-12	5.34018e-14	5.1136e-09	4.5991e-10	0.00133499	1.04431e-05	0.00147766	0.0899386		97.2064	3.18104	1.08454
88	2022-03-09 12:55:34	3414779	2.58537e-11	5.69339e-11	5.13469e-09	7.3659e-12	1.29336e-09	1.67532e-11	1.13868e-13	5.10902e-09	4.48796e-10	0.00327914	2.22876e-05	0.00144175	0.0878439		93.2603	3.17741	1.06752
89	2022-03-09 12:56:15	3455877	1.40824e-11	3.8618e-11	5.09972e-09	7.04985e-12	1.24789e-09	9.1254e-12	7.7236e-14	5.07422e-09	4.33018e-10	0.00179838	1.52213e-05	0.00138935	0.0853368		96.0789	3.15292	1.07028
90	2022-03-09 12:56:56	3496974	2.75629e-11	4.27439e-11	5.04642e-09	6.94665e-12	1.22366e-09	1.78608e-11	8.54878e-14	5.02119e-09	4.2461e-10	0.00355708	1.70254e-05	0.00138347	0.0845637		92.4687	3.16773	1.06085
91	2022-03-09 12:57:38	3538072	2.99387e-11	4.83032e-11	5.04889e-09	6.50375e-12	1.20278e-09	1.94003e-11	9.66064e-14	5.02365e-09	4.17365e-10	0.00386179	1.92303e-05	0.00129463	0.08308		91.7317	3.02171	1.00756
92	2022-03-09 12:58:19	3579169	2.55312e-11	4.70644e-11	5.04792e-09	6.22747e-12	1.17566e-09	1.65442e-11	9.41288e-14	5.02268e-09	4.07954e-10	0.0032939	1.87408e-05	0.00123987	0.0812224		92.7052	2.96191	0.990811
93	2022-03-09 12:59:00	3620267	1.95327e-11	3.37344e-11	5.02428e-09	6.27692e-12	1.14723e-09	1.26572e-11	6.74688e-14	4.99916e-09	3.98089e-10	0.00253186	1.3496e-05	0.0012556	0.0796312		94.1943	3.05662	1.0293
94	2022-03-09 12:59:41	3661364	3.36044e-11	3.56694e-11	5.07344e-09	6.07267e-12	1.15683e-09	2.17757e-11	7.13388e-14	5.04807e-09	4.0142e-10	0.00431366	1.41319e-05	0.00120297	0.0795195		90.4741	2.93623	0.973276
95	2022-03-09 13:00:22	3702462	2.94119e-11	4.50372e-11	5.11006e-09	5.59645e-12	1.12515e-09	1.90589e-11	9.00744e-14	5.08451e-09	3.90427e-10	0.00374843	1.77155e-05	0.00110069	0.0767876		91.3335	2.78631	0.925424
96	2022-03-09 13:01:03	3743559	2.40907e-11	4.35528e-11	5.09443e-09	5.27932e-12	1.10379e-09	1.56108e-11	8.71056e-14	5.06896e-09	3.83015e-10	0.00307968	1.71841e-05	0.0010415	0.0755609		92.6517	2.68217	0.894532
97	2022-03-09 13:01:44	3784657	2.08979e-11	4.50987e-11	5.46286e-09	5.22665e-12	1.10895e-09	1.35418e-11	9.01974e-14	5.43555e-09	3.84806e-10	0.00249135	1.6594e-05	0.000961569	0.0707943		93.5886	2.64407	0.88468
98	2022-03-09 13:02:25	3825754	2.59074e-12	3.82494e-11	5.94135e-09	4.88802e-12	1.11747e-09	1.6788e-12	7.64988e-14	5.91164e-09	3.87762e-10	0.000283982	1.29404e-05	0.000826846	0.0655929		99.1626	2.45867	0.837908
99	2022-03-09 13:03:06	3866852	8.56773e-12	4.36039e-11	1.07141e-07	4.9321e-12	1.17446e-09	5.55189e-12	8.72078e-14	1.06605e-07	4.07538e-10	5.20789e-05	8.18044e-07	4.62651e-05	0.00382286		97.4092	2.36274	0.799495
100	2022-03-09 13:03:49	3909490	1.58992e-11	3.30485e-11	3.37101e-07	4.57305e-12	1.00217e-09	1.03027e-11	6.6097e-14	3.35415e-07	3.47753e-10	3.07162e-05	1.9706e-07	1.3634e-05	0.00103678		94.5426	2.56218	0.859652
101	2022-03-09 13:04:27	3947987	1.07392e-11	1.96264e-11	3.9757e-07	4.09682e-12	8.85079e-10	6.959e-12	3.92528e-14	3.95582e-07	3.07122e-10	1.75918e-05	9.92279e-08	1.03564e-05	0.000776381		95.7731	2.59822	0.876021
102	2022-03-09 13:05:06	3986484	2.37488e-10	3.00283e-11	3.97838e-07	1.45565e-10	4.35327e-09	1.53892e-10	6.00566e-14	3.95849e-07	1.51058e-09	0.000388765	1.51716e-07	0.000367729	0.00381606		85.41	16.158	6.01558
103	2022-03-09 13:05:50	4030313	1.02786e-08	2.47147e-11	3.68276e-07	2.93124e-10	4.73768e-09	6.66053e-09	4.94294e-14	3.66435e-07	1.64397e-09	0.0181766	1.34893e-07	0.000799935	0.00448641		14.3414	26.2859	3.21178
104	2022-03-09 13:06:23	4063730	1.24337e-08	3.99387e-11	3.62095e-07	3.03618e-10	3.35169e-09	8.05704e-09	7.98774e-14	3.60285e-07	1.16304e-09	0.022363	2.21706e-07	0.000842717	0.00322811		9.89885	34.3003	3.09763
105	2022-03-09 13:06:53	4093497	1.31015e-08	2.34451e-11	3.57257e-07	2.94894e-10	2.59644e-09	8.48977e-09	4.68902e-14	3.55471e-07	9.00965e-10	0.0238832	1.3191e-07	0.000829587	0.00253457		8.07131	39.5619	2.99651
106	2022-03-09 13:07:23	4123264	1.37398e-08	3.7973e-11	3.50538e-07	1.91919e-10	1.95359e-09	8.90339e-09	7.5946e-14	3.48785e-07	6.77896e-10	0.0255269	2.17744e-07	0.00055025	0.00194359		5.62739	36.1494	1.93461
107	2022-03-09 13:07:54	4154580	4.55249e-09	3.89968e-11	3.25993e-07	9.13019e-11	1.58154e-09	2.95001e-09	7.79936e-14	3.24363e-07	5.48794e-10	0.00909479	2.40452e-07	0.000281481	0.00169191		11.0303	24.9637	2.41972
108	2022-03-09 13:08:26	4186447	1.94622e-09	3.26901e-11	4.52395e-07	3.86785e-11	1.28436e-09	1.26115e-09	6.53802e-14	4.50133e-07	4.45673e-10	0.00280173	1.45246e-07	8.59268e-05	0.000990092		17.1766	14.7883	2.00439
109	2022-03-09 13:09:05	4225855	5.53538e-10	2.8257e-11	3.48478e-07	1.84394e-11	2.1794e-09	3.58693e-10	5.6514e-14	3.46736e-07	7.56252e-10	0.00103448	1.62989e-07	5.318e-05	0.00218106		52.509	4.64945	1.23498
110	2022-03-09 13:09:44	4264352	1.45479e-10	1.81521e-11	5.65478e-08	1.69925e-11	2.54401e-09	9.42704e-11	3.63042e-14	5.62651e-08	8.82771e-10	0.00167547	6.45235e-07	0.000302008	0.0156895		82.9426	3.70694	1.19797
111	2022-03-09 13:10:23	4303869	6.48116e-11	1.8838e-11	1.37078e-08	1.53875e-11	2.24359e-09	4.19979e-11	3.7676e-14	1.36393e-08	7.78526e-10	0.00307919	2.76232e-06	0.00112818	0.0570798		90.5975	3.80249	1.2719
112	2022-03-09 13:11:02	4342867	5.06754e-11	4.44025e-11	6.92229e-09	1.40588e-11	1.99763e-09	3.28377e-11	8.8805e-14	6.88768e-09	6.93178e-10	0.00476759	1.28933e-05	0.00204115	0.10064		91.6556	3.89773	1.31066
113	2022-03-09 13:11:44	4384984	4.18926e-11	4.56004e-11	5.91653e-09	1.25549e-11	1.8353e-09	2.71464e-11	9.12008e-14	5.88695e-09	6.36849e-10	0.00461129	1.5492e-05	0.00213267	0.10818		92.4208	3.79273	1.2779
114	2022-03-09 13:12:26	4426082	2.90679e-11	2.91478e-11	5.54174e-09	1.10606e-11	1.69361e-09	1.8836e-11	5.82956e-14	5.51403e-09	5.87683e-10	0.00341601	1.05722e-05	0.0020059	0.106579		94.1822	3.62725	1.22842
115	2022-03-09 13:13:07	4467179	3.40666e-11	4.43923e-11	5.41884e-09	9.70188e-12	1.56595e-09	2.20752e-11	8.87846e-14	5.39175e-09	5.43385e-10	0.00409425	1.64668e-05	0.00179939	0.100781		92.7268	3.44725	1.15885
116	2022-03-09 13:13:48	4508277	3.37656e-11	3.56899e-11	5.30454e-09	9.0945e-12	1.47896e-09	2.18801e-11	7.13798e-14	5.27802e-09	5.13199e-10	0.00414552	1.3524e-05	0.00172309	0.0972333		92.3924	3.42246	1.14871
117	2022-03-09 13:14:29	4549374	3.09492e-11	3.5782e-11	5.25086e-09	8.18828e-12	1.39102e-09	2.00551e-11	7.1564e-14	5.22461e-09	4.82684e-10	0.00383858	1.36975e-05	0.00156725	0.0923867		92.5618	3.28101	1.1004
118	2022-03-09 13:15:10	4590472	2.16504e-11	4.29282e-11	5.1948e-09	7.8905e-12	1.33679e-09	1.40295e-11	8.58564e-14	5.16883e-09	4.63866e-10	0.00271424	1.66104e-05	0.00152656	0.089743		94.4743	3.28954	1.11154
119	2022-03-09 13:15:51	4631569	2.91109e-11	4.1802e-11	5.25904e-09	7.41427e-12	1.29228e-09	1.88639e-11	8.3604e-14	5.23274e-09	4.48421e-10	0.00360497	1.59771e-05	0.0014169	0.0856952		92.4704	3.2004	1.07214
120	2022-03-09 13:16:32	4672667	5.10301e-11	4.03585e-11	5.21918e-09	7.23475e-12	1.24885e-09	3.30675e-11	8.0717e-14	5.19308e-09	4.33351e-10	0.0063676	1.55432e-05	0.00139315	0.0834477		87.1342	3.23051	1.05905
121	2022-03-09 13:17:13	4713764	2.45099e-11	2.91683e-11	5.13264e-09	6.61017e-12	1.22269e-09	1.58824e-11	5.83366e-14	5.10698e-09	4.24273e-10	0.00310994	1.14229e-05	0.00129434	0.0830772		93.2317	3.02143	1.01333
122	2022-03-09 13:17:54	4754862	2.60794e-11	3.62325e-11	5.2007e-09	6.57362e-12	1.18814e-09	1.68995e-11	7.2465e-14	5.1747e-09	4.12285e-10	0.00326579	1.40037e-05	0.00127034	0.0796732		92.6413	3.0898	1.03463
123	2022-03-09 13:18:35	4795959	2.41659e-11	3.95087e-11	5.10652e-09	6.14577e-12	1.15514e-09	1.56595e-11	7.90174e-14	5.08099e-09	4.00834e-10	0.00308198	1.55516e-05	0.00120956	0.0788889		92.9545	2.97469	0.996155
124	2022-03-09 13:19:17	4837057	1.24269e-11	4.25596e-11	5.10795e-09	5.94367e-12	1.16906e-09	8.05263e-12	8.51192e-14	5.08241e-09	4.05664e-10	0.00158441	1.67478e-05	0.00116946	0.0798172		96.2869	2.84634	0.963957
125	2022-03-09 13:19:58	4878154	2.05217e-11	2.36397e-11	5.10187e-09	5.19225e-12	1.13955e-09	1.32981e-11	4.72794e-14	5.07636e-09	3.95424e-10	0.00261961	9.31364e-06	0.00102283	0.0778951		93.8499	2.55867	0.856161
126	2022-03-09 13:20:39	4919252	1.86512e-11	4.30204e-11	5.64815e-09	5.13312e-12	1.11243e-09	1.2086e-11	8.60408e-14	5.61991e-09	3.86013e-10	0.00215056	1.531e-05	0.000913381	0.0686867		94.2521	2.59009	0.86833
127	2022-03-09 13:21:20	4960349	2.82079e-11	4.23753e-11	5.06309e-09	5.30405e-12	1.11364e-09	1.82787e-11	8.47506e-14	5.03777e-09	3.86433e-10	0.00362833	1.6823e-05	0.00105286	0.0767071		91.5705	2.67122	0.887008
128	2022-03-09 13:22:01	5001447	2.11559e-11	5.05351e-11	5.18068e-09	4.38815e-12	1.09551e-09	1.3709e-11	1.0107e-13	5.15478e-09	3.80142e-10	0.00265948	1.96071e-05	0.000851278	0.0737456		93.416	2.25601	0.751431
129	2022-03-09 13:22:42	5042544	1.87372e-11	3.02945e-11	5.46388e-09	4.74505e-12	1.07812e-09	1.21417e-11	6.0589e-14	5.43656e-09	3.74108e-10	0.00223334	1.11447e-05	0.000872804	0.0688133		94.0473	2.47358	0.827625
130	2022-03-09 13:23:23	5083642	2.11882e-11	3.00283e-11	5.91705e-09	4.76547e-12	1.0786e-09	1.373e-11	6.00566e-14	5.88746e-09	3.74274e-10	0.00233207	1.02008e-05	0.000809427	0.0635714		93.324	2.48289	0.828531
131	2022-03-09 13:24:04	5124739	2.95409e-11	3.6939e-11	7.9785e-08	5.0138e-12	1.15406e-09	1.91425e-11	7.3878e-14	7.93861e-08	4.00459e-10	0.000241132	9.30617e-07	6.31572e-05	0.00504445		91.4703	2.44242	0.80885
132	2022-03-09 13:24:46	5166857	5.77274e-12	1.55413e-11	3.31816e-07	4.34085e-12	9.51064e-10	3.74074e-12	3.10826e-14	3.30157e-07	3.30019e-10	1.13302e-05	9.41449e-08	1.31478e-05	0.000999583		97.8391	2.563	0.870285
133	2022-03-09 13:25:26	5206374	9.78248e-12	3.3417e-11	3.97122e-07	3.88505e-12	8.54121e-10	6.33905e-12	6.6834e-14	3.95136e-07	2.9638e-10	1.60427e-05	1.69142e-07	9.83217e-06	0.00075007		95.9993	2.55413	0.86154
134	2022-03-09 13:26:04	5244872	8.62256e-11	2.98132e-11	4.00078e-07	1.32322e-10	3.93046e-09	5.58742e-11	5.96264e-14	3.98078e-07	1.36387e-09	0.00014036	1.49786e-07	0.000332403	0.00342614		93.5789	16.2501	6.29593
135	2022-03-09 13:26:48	5288700	9.80463e-09	3.73996e-11	3.62005e-07	2.87199e-10	4.71572e-09	6.3534e-09	7.47992e-14	3.60195e-07	1.63635e-09	0.0176388	2.07663e-07	0.000797343	0.00454297		14.8202	25.9811	3.26067
136	2022-03-09 13:27:22	5322117	1.21346e-08	4.30818e-11	3.61199e-07	3.00327e-10	3.38649e-09	7.86322e-09	8.61636e-14	3.59393e-07	1.17511e-09	0.0218792	2.39748e-07	0.000835651	0.00326971		10.1464	33.8234	3.11998
137	2022-03-09 13:27:51	5351884	1.2865e-08	3.31713e-11	3.56451e-07	2.92765e-10	2.58972e-09	8.33652e-09	6.63426e-14	3.54669e-07	8.98633e-10	0.0235051	1.87055e-07	0.00082546	0.00253372		8.1743	39.4501	3.02303
138	2022-03-09 13:28:21	5381650	1.28435e-08	3.1134e-11	4.05184e-07	2.28633e-10	2.04082e-09	8.32259e-09	6.2268e-14	4.03158e-07	7.08165e-10	0.0206435	1.54451e-07	0.000567105	0.00175654		6.54379	39.2337	2.43619
139	2022-03-09 13:28:54	5414007	5.15593e-09	3.49323e-11	4.26147e-07	8.37844e-11	1.49192e-09	3.34104e-09	6.98646e-14	4.24016e-07	5.17696e-10	0.00787952	1.64769e-07	0.000197597	0.00122093		9.30224	24.4506	2.03478
140	2022-03-09 13:29:25	5445874	1.66558e-09	1.39135e-11	4.73537e-07	3.61479e-11	1.22941e-09	1.0793e-09	2.7827e-14	4.71169e-07	4.26605e-10	0.00229068	5.90594e-08	7.67196e-05	0.000905418		18.7742	14.4902	2.10258
141	2022-03-09 13:30:05	5485281	4.53971e-10	3.41644e-11	2.90518e-07	1.84115e-11	2.21059e-09	2.94173e-10	6.83288e-14	2.89065e-07	7.67075e-10	0.00101767	2.36378e-07	6.36932e-05	0.00265364		57.7432	4.58017	1.27431
142	2022-03-09 13:30:43	5523779	1.40298e-10	3.72768e-11	4.79371e-08	1.84975e-11	2.47179e-09	9.09131e-11	7.45536e-14	4.76974e-08	8.57711e-10	0.00190604	1.56305e-06	0.000387809	0.0179823		83.1112	4.13453	1.34281
143	2022-03-09 13:31:23	5563297	6.71121e-11	4.29691e-11	1.2092e-08	1.67345e-11	2.17724e-09	4.34886e-11	8.59382e-14	1.20315e-08	7.55502e-10	0.00361455	7.14274e-06	0.00139089	0.0627935		90.0715	4.24164	1.42205
144	2022-03-09 13:32:02	5602294	5.15676e-11	3.88125e-11	6.63828e-09	1.46447e-11	1.92648e-09	3.34158e-11	7.7625e-14	6.60509e-09	6.68489e-10	0.0050591	1.17523e-05	0.00221718	0.101208		91.2603	4.19706	1.41333
145	2022-03-09 13:32:44	5644412	4.37094e-11	3.83109e-11	5.76578e-09	1.26656e-11	1.78323e-09	2.83237e-11	7.66218e-14	5.73695e-09	6.18781e-10	0.00493706	1.33558e-05	0.00220772	0.107859		91.9172	3.93226	1.32412
146	2022-03-09 13:33:25	5685509	3.30454e-11	4.16382e-11	5.46814e-09	1.11456e-11	1.63062e-09	2.14134e-11	8.32764e-14	5.4408e-09	5.65825e-10	0.00393571	1.53059e-05	0.00204852	0.103997		93.2131	3.78973	1.28082
147	2022-03-09 13:34:06	5726607	2.71222e-11	4.35732e-11	5.43929e-09	1.01211e-11	1.53379e-09	1.75752e-11	8.71464e-14	5.41209e-09	5.32225e-10	0.00324739	1.61022e-05	0.00187009	0.09834		94.019	3.66339	1.2404
148	2022-03-09 13:34:47	5767704	1.85974e-11	4.7607e-11	5.33448e-09	8.96443e-12	1.43145e-09	1.20511e-11	9.5214e-14	5.30781e-09	4.96713e-10	0.00227045	1.79385e-05	0.00168891	0.0935816		95.527	3.48311	1.18394
149	2022-03-09 13:35:28	5808802	3.91191e-11	3.58742e-11	5.26284e-09	8.39575e-12	1.37459e-09	2.53492e-11	7.17484e-14	5.23653e-09	4.76983e-10	0.00484084	1.37015e-05	0.00160331	0.0910876		90.6898	3.40015	1.13325
150	2022-03-09 13:36:09	5849899	3.90224e-11	4.70951e-11	5.18734e-09	7.54327e-12	1.33271e-09	2.52865e-11	9.41902e-14	5.1614e-09	4.6245e-10	0.00489916	1.8249e-05	0.00146148	0.0895978		90.4255	3.15862	1.04912
151	2022-03-09 13:36:50	5890997	3.05837e-11	4.24061e-11	5.18838e-09	7.11757e-12	1.27368e-09	1.98182e-11	8.48122e-14	5.16244e-09	4.41967e-10	0.00383893	1.64287e-05	0.00137872	0.0856121		92.0075	3.11978	1.04239
152	2022-03-09 13:37:32	5932094	2.82939e-11	2.7479e-11	5.37492e-09	6.93482e-12	1.21909e-09	1.83344e-11	5.4958e-14	5.34805e-09	4.23024e-10	0.00342825	1.02763e-05	0.0012967	0.0790988		92.2577	3.1742	1.06216
153	2022-03-09 13:38:13	5973192	2.50904e-11	4.15563e-11	5.11585e-09	6.40377e-12	1.19462e-09	1.62586e-11	8.31126e-14	5.09027e-09	4.14533e-10	0.00319405	1.63277e-05	0.00125804	0.0814364		92.9301	2.99645	1.00357
154	2022-03-09 13:38:54	6014289	3.25079e-11	3.17994e-11	5.06795e-09	6.2694e-12	1.16931e-09	2.10651e-11	6.35988e-14	5.04261e-09	4.05751e-10	0.00417742	1.26123e-05	0.00124328	0.0804644		90.8509	2.99718	0.995581
155	2022-03-09 13:39:35	6055387	3.03364e-11	4.03994e-11	5.06194e-09	6.1404e-12	1.15022e-09	1.9658e-11	8.07988e-14	5.03663e-09	3.99126e-10	0.003903	1.60422e-05	0.00121915	0.0792447		91.2787	2.98449	0.992969
156	2022-03-09 13:40:16	6096484	1.99949e-11	3.9478e-11	5.02941e-09	5.82542e-12	1.11964e-09	1.29567e-11	7.8956e-14	5.00426e-09	3.88515e-10	0.00258913	1.57777e-05	0.00116409	0.0776368		93.9193	2.91093	0.977799
157	2022-03-09 13:40:57	6137582	3.18952e-11	4.20068e-11	5.03734e-09	5.8308e-12	1.114e-09	2.06681e-11	8.40136e-14	5.01215e-09	3.86558e-10	0.00412359	1.6762e-05	0.00116333	0.0771241		90.5977	2.92782	0.970915
158	2022-03-09 13:41:38	6178679	2.43487e-11	4.95932e-11	5.11324e-09	5.43305e-12	1.09719e-09	1.5778e-11	9.91864e-14	5.08767e-09	3.80725e-10	0.00310121	1.94954e-05	0.00106788	0.0748328		92.5443	2.77416	0.925696
159	2022-03-09 13:42:19	6219777	7.20248e-12	2.9547e-11	4.99214e-09	5.32555e-12	1.08496e-09	4.66721e-12	5.9094e-14	4.96718e-09	3.76481e-10	0.000939609	1.18969e-05	0.00107215	0.0757937		97.6459	2.75086	0.935261
160	2022-03-09 13:43:00	6260874	2.16074e-11	4.89072e-11	5.01406e-09	4.44835e-12	1.07032e-09	1.40016e-11	9.78144e-14	4.98899e-09	3.71401e-10	0.0028065	1.96061e-05	0.000891633	0.0744441		93.1432	2.3388	0.778838
161	2022-03-09 13:43:41	6301972	1.97477e-11	3.74304e-11	5.44902e-09	4.66227e-12	1.05629e-09	1.27965e-11	7.48608e-14	5.42177e-09	3.66533e-10	0.00236021	1.38074e-05	0.000859916	0.0676038		93.626	2.48038	0.828652
162	2022-03-09 13:44:23	6343069	1.17282e-11	3.25877e-11	5.88325e-09	4.66872e-12	1.04692e-09	7.59987e-12	6.51754e-14	5.85383e-09	3.63281e-10	0.00129827	1.11338e-05	0.000797549	0.0620587		96.0814	2.50546	0.844934
163	2022-03-09 13:45:04	6384167	3.18414e-11	3.18199e-11	7.28607e-08	4.8934e-12	1.13175e-09	2.06332e-11	6.36398e-14	7.24964e-08	3.92717e-10	0.00028461	8.77834e-07	6.74985e-05	0.00541706		90.7023	2.43109	0.802538
164	2022-03-09 13:45:46	6426284	2.33382e-11	3.73587e-11	3.28859e-07	4.08177e-12	9.50107e-10	1.51232e-11	7.47174e-14	3.27215e-07	3.29687e-10	4.62178e-05	2.28344e-07	1.24743e-05	0.00100756		91.7847	2.41578	0.800832
165	2022-03-09 13:46:25	6465802	-5.55774e-12	1.92885e-11	3.94345e-07	3.77862e-12	8.52079e-10	-3.60142e-12	3.8577e-14	3.92373e-07	2.95671e-10	-9.17854e-06	9.83171e-08	9.63017e-06	0.000753546		102.433	2.49194	0.858924
166	2022-03-09 13:47:04	6504299	4.52359e-11	3.11032e-11	4.00705e-07	1.25053e-10	4.0027e-09	2.93129e-11	6.22064e-14	3.98701e-07	1.38894e-09	7.35208e-05	1.56022e-07	0.000313651	0.00348365		96.5468	15.2587	5.91897
167	2022-03-09 13:47:48	6548128	9.52922e-09	2.66497e-11	3.6532e-07	2.80204e-10	4.79623e-09	6.17493e-09	5.32994e-14	3.63493e-07	1.66429e-09	0.0169877	1.46631e-07	0.000770864	0.0045786		15.2646	25.1897	3.23136
168	2022-03-09 13:48:21	6581545	1.21582e-08	3.88637e-11	3.58333e-07	2.9349e-10	3.38649e-09	7.87851e-09	7.77274e-14	3.56541e-07	1.17511e-09	0.0220971	2.18004e-07	0.000823158	0.00329586		10.0585	33.3101	3.04412
169	2022-03-09 13:48:51	6611312	1.26258e-08	3.61609e-11	3.55376e-07	2.87922e-10	2.59859e-09	8.18152e-09	7.23218e-14	3.53599e-07	9.01711e-10	0.0231378	2.0453e-07	0.000814261	0.00255009		8.28235	38.9709	3.01991
170	2022-03-09 13:49:21	6641079	1.26614e-08	3.6683e-11	3.84401e-07	2.30178e-10	2.05966e-09	8.20459e-09	7.3366e-14	3.82479e-07	7.14702e-10	0.0214511	1.91817e-07	0.000601806	0.0018686		6.68284	39.1749	2.48125
171	2022-03-09 13:49:53	6673436	5.42645e-09	2.82264e-11	4.23638e-07	8.30997e-11	1.48808e-09	3.51634e-09	5.64528e-14	4.2152e-07	5.16364e-10	0.00834205	1.33927e-07	0.000197143	0.001225		8.84761	24.3473	1.93664
172	2022-03-09 13:50:24	6704264	1.76952e-09	1.86537e-11	4.70401e-07	3.58964e-11	1.24117e-09	1.14665e-09	3.73074e-14	4.68049e-07	4.30686e-10	0.00244985	7.97083e-08	7.66937e-05	0.000920173		17.9739	14.2867	2.00237
173	2022-03-09 13:51:03	6743671	4.97089e-10	1.70259e-11	2.94012e-07	1.77525e-11	2.31449e-09	3.22114e-10	3.40518e-14	2.92542e-07	8.03128e-10	0.00110109	1.164e-07	6.06836e-05	0.00274534		56.5561	4.2335	1.16271
174	2022-03-09 13:51:42	6782169	1.26409e-10	4.96239e-11	4.62988e-08	1.72311e-11	2.48282e-09	8.1913e-11	9.92478e-14	4.60673e-08	8.61539e-10	0.00177812	2.15441e-06	0.000374042	0.0187017		84.5436	3.8458	1.25384
175	2022-03-09 13:52:21	6821687	6.96921e-11	3.01716e-11	1.17527e-08	1.56262e-11	2.21623e-09	4.51605e-11	6.03432e-14	1.16939e-08	7.69032e-10	0.00386187	5.16021e-06	0.00133627	0.0657633		89.8592	3.90487	1.30355
176	2022-03-09 13:53:00	6860684	5.98881e-11	3.22909e-11	6.65403e-09	1.38664e-11	1.9506e-09	3.88075e-11	6.45818e-14	6.62076e-09	6.76858e-10	0.00586149	9.75444e-06	0.00209438	0.102233		90.0782	3.93565	1.31544
177	2022-03-09 13:53:42	6902802	5.60934e-11	3.83825e-11	5.75669e-09	1.23238e-11	1.76319e-09	3.63485e-11	7.6765e-14	5.72791e-09	6.11827e-10	0.00634587	1.34019e-05	0.00215154	0.106815		89.7501	3.87205	1.29163
178	2022-03-09 13:54:23	6943899	3.88719e-11	3.7072e-11	5.46887e-09	1.08521e-11	1.62629e-09	2.5189e-11	7.4144e-14	5.44153e-09	5.64323e-10	0.00462903	1.36256e-05	0.00199431	0.103707		92.0849	3.70315	1.24492
179	2022-03-09 13:55:04	6984997	2.83154e-11	4.45766e-11	5.33812e-09	9.96095e-12	1.52024e-09	1.83484e-11	8.91532e-14	5.31143e-09	5.27523e-10	0.00345451	1.67852e-05	0.00187538	0.0993185		93.7188	3.63848	1.23024
180	2022-03-09 13:55:46	7026094	2.69609e-11	4.10547e-11	5.23834e-09	8.80318e-12	1.42317e-09	1.74707e-11	8.21094e-14	5.21215e-09	4.9384e-10	0.00335191	1.57535e-05	0.00168897	0.0947479		93.606	3.44191	1.16095
181	2022-03-09 13:56:27	7067192	2.79822e-11	2.41823e-11	5.19188e-09	8.42693e-12	1.36883e-09	1.81325e-11	4.83646e-14	5.16592e-09	4.74984e-10	0.00351002	9.36224e-06	0.00163125	0.0919457		93.1336	3.42637	1.15337
182	2022-03-09 13:57:08	7108289	3.18844e-11	4.70849e-11	5.13193e-09	7.63142e-12	1.30511e-09	2.06611e-11	9.41698e-14	5.10627e-09	4.52873e-10	0.00404622	1.8442e-05	0.00149452	0.0886896		91.8905	3.25969	1.09017
183	2022-03-09 13:57:49	7149387	2.69932e-11	4.11058e-11	5.12753e-09	7.3143e-12	1.25413e-09	1.74916e-11	8.22116e-14	5.10189e-09	4.35183e-10	0.00342845	1.61139e-05	0.00143364	0.0852984		92.7851	3.25157	1.09119
184	2022-03-09 13:58:30	7190484	2.41122e-11	3.74406e-11	5.1268e-09	6.78755e-12	1.21681e-09	1.56247e-11	7.48812e-14	5.10117e-09	4.22233e-10	0.00306297	1.46792e-05	0.00133059	0.0827719		93.3104	3.11439	1.04583
185	2022-03-09 13:59:11	7231582	3.49911e-11	2.3824e-11	5.11893e-09	6.15652e-12	1.18982e-09	2.26742e-11	4.7648e-14	5.09334e-09	4.12868e-10	0.00445175	9.35497e-06	0.00120874	0.0810603		90.3632	2.89563	0.95896
186	2022-03-09 13:59:52	7272679	9.41698e-12	3.79013e-11	5.11615e-09	6.05117e-12	1.15035e-09	6.1022e-12	7.58026e-14	5.09057e-09	3.99171e-10	0.00119873	1.48908e-05	0.0011887	0.0784139		97.1186	2.94211	1.00036
187	2022-03-09 14:00:33	7313777	2.81219e-11	3.83006e-11	5.06792e-09	5.86627e-12	1.13979e-09	1.8223e-11	7.66012e-14	5.04258e-09	3.95507e-10	0.00361382	1.51909e-05	0.00116335	0.0784335		91.787	2.88045	0.95929
188	2022-03-09 14:01:14	7354874	1.07929e-11	2.98132e-11	5.09044e-09	5.43735e-12	1.11784e-09	6.9938e-12	5.96264e-14	5.06499e-09	3.8789e-10	0.00138081	1.17723e-05	0.00107352	0.0765827		96.6116	2.72669	0.92337
189	2022-03-09 14:01:55	7395972	2.33919e-11	3.14718e-11	5.07527e-09	5.38037e-12	1.07979e-09	1.5158e-11	6.29436e-14	5.04989e-09	3.74687e-10	0.00300164	1.24643e-05	0.00106544	0.074197		92.7095	2.79129	0.932118
190	2022-03-09 14:02:37	7437069	2.57784e-11	2.78169e-11	5.03308e-09	5.23202e-12	1.07512e-09	1.67044e-11	5.56338e-14	5.00791e-09	3.73067e-10	0.0033356	1.11092e-05	0.00104475	0.0744954		91.9882	2.72795	0.907813
191	2022-03-09 14:03:18	7478167	1.49209e-11	5.44768e-11	5.0529e-09	5.17612e-12	1.063e-09	9.66874e-12	1.08954e-13	5.02764e-09	3.68861e-10	0.00192312	2.16709e-05	0.00102953	0.0733667		95.1494	2.72914	0.919358
192	2022-03-09 14:03:59	7519264	2.96807e-11	4.26109e-11	5.03481e-09	4.02695e-12	1.04633e-09	1.92331e-11	8.52218e-14	5.00964e-09	3.63077e-10	0.00383922	1.70116e-05	0.000803841	0.0724756		90.6107	2.1696	0.714137
193	2022-03-09 14:04:40	7560362	1.67162e-11	4.42285e-11	5.43859e-09	4.6354e-12	1.03636e-09	1.08321e-11	8.8457e-14	5.4114e-09	3.59617e-10	0.00200172	1.63464e-05	0.000856599	0.0664555		94.4542	2.51257	0.842338
194	2022-03-09 14:05:21	7601459	5.31049e-12	4.50885e-11	5.85881e-09	4.51177e-12	1.05053e-09	3.4412e-12	9.0177e-14	5.82952e-09	3.64534e-10	0.000590306	1.5469e-05	0.000773953	0.0625324		98.1914	2.41499	0.819894
195	2022-03-09 14:06:02	7642557	1.09757e-11	4.21706e-11	6.19545e-08	4.816e-12	1.14279e-09	7.11225e-12	8.43412e-14	6.16447e-08	3.96548e-10	0.000115375	1.36818e-06	7.81251e-05	0.0064328		96.6172	2.37087	0.800031
196	2022-03-09 14:06:44	7684675	1.38782e-11	1.74559e-11	3.24201e-07	4.13337e-12	9.36543e-10	8.99307e-12	3.49118e-14	3.2258e-07	3.2498e-10	2.78786e-05	1.08227e-07	1.28135e-05	0.00100744		94.8797	2.4804	0.832533
197	2022-03-09 14:07:24	7724194	7.00898e-12	3.9867e-11	3.9533e-07	3.70875e-12	8.354e-10	4.54182e-12	7.9734e-14	3.93353e-07	2.89884e-10	1.15464e-05	2.02703e-07	9.42855e-06	0.000736955		97.036	2.49427	0.844035
198	2022-03-09 14:08:02	7762692	2.01562e-11	2.50218e-11	4.00884e-07	1.14734e-10	3.91464e-09	1.30612e-11	5.00436e-14	3.9888e-07	1.35838e-09	3.27448e-05	1.2546e-07	0.000287641	0.00340549		98.3815	14.4511	5.59499
199	2022-03-09 14:08:46	7806520	9.30324e-09	3.20349e-11	3.61916e-07	2.81554e-10	5.00764e-09	6.0285e-09	6.40698e-14	3.60106e-07	1.73765e-09	0.0167409	1.77919e-07	0.000781863	0.00482538		16.0249	24.4742	3.26061
200	2022-03-09 14:09:19	7839938	1.19855e-08	4.39315e-11	3.59408e-07	2.92796e-10	3.48764e-09	7.7666e-09	8.7863e-14	3.57611e-07	1.21021e-09	0.021718	2.45694e-07	0.000818756	0.00338416		10.3634	32.6073	3.0557
201	2022-03-09 14:09:49	7869704	1.26111e-08	3.76556e-11	3.53495e-07	2.83605e-10	2.60196e-09	8.17199e-09	7.53112e-14	3.51728e-07	9.0288e-10	0.0232339	2.14118e-07	0.00080632	0.00256699		8.2528	38.5814	2.97706
202	2022-03-09 14:10:19	7899470	1.28576e-08	2.92604e-11	3.6738e-07	2.33914e-10	2.07081e-09	8.33172e-09	5.85208e-14	3.65543e-07	7.18571e-10	0.0227927	1.60093e-07	0.000639908	0.00196576		6.64686	39.4307	2.48591
203	2022-03-09 14:10:51	7931828	5.51775e-09	2.53699e-11	4.19787e-07	8.41413e-11	1.49324e-09	3.5755e-09	5.07398e-14	4.17688e-07	5.18154e-10	0.00856022	1.21478e-07	0.000201445	0.00124053		8.75902	24.5136	1.93306
204	2022-03-09 14:11:23	7963694	1.74165e-09	4.28258e-11	4.68341e-07	3.53535e-11	1.21382e-09	1.12859e-09	8.56516e-14	4.65999e-07	4.21196e-10	0.00242187	1.83802e-07	7.5866e-05	0.000903854		17.8959	14.3717	2.00824
205	2022-03-09 14:12:03	8003101	4.91628e-10	2.22678e-11	2.8353e-07	1.80008e-11	2.20867e-09	3.18575e-10	4.45356e-14	2.82112e-07	7.66408e-10	0.00112925	1.57865e-07	6.38072e-05	0.00271668		55.7413	4.48643	1.22604
206	2022-03-09 14:12:41	8041599	1.32063e-10	2.71207e-11	4.92108e-08	1.64227e-11	2.36896e-09	8.55768e-11	5.42414e-14	4.89647e-08	8.22029e-10	0.00174772	1.10776e-06	0.000335398	0.0167882		83.3197	3.84189	1.24542
207	2022-03-09 14:13:21	8081117	6.57039e-11	3.56694e-11	1.23642e-08	1.58508e-11	2.14196e-09	4.25761e-11	7.13388e-14	1.23024e-08	7.4326e-10	0.0034608	5.79878e-06	0.00128843	0.060416		90.1007	4.09035	1.3694
208	2022-03-09 14:14:00	8120114	3.61521e-11	2.2708e-11	6.70077e-09	1.44791e-11	1.89685e-09	2.34266e-11	4.5416e-14	6.66727e-09	6.58207e-10	0.00351367	6.81179e-06	0.00217167	0.0987222		93.6173	4.21388	1.4325
209	2022-03-09 14:14:42	8162232	3.74206e-11	5.20196e-11	5.79436e-09	1.26301e-11	1.7212e-09	2.42485e-11	1.04039e-13	5.76539e-09	5.97256e-10	0.00420588	1.80455e-05	0.00219068	0.103593		92.7737	4.05708	1.37256
210	2022-03-09 14:15:23	8203329	3.78936e-11	3.46763e-11	5.50819e-09	1.1023e-11	1.58875e-09	2.45551e-11	6.93526e-14	5.48065e-09	5.51296e-10	0.00448032	1.26541e-05	0.00201126	0.10059		92.1111	3.84471	1.29449
211	2022-03-09 14:16:04	8244427	3.01429e-11	4.16382e-11	5.35478e-09	1.00716e-11	1.46709e-09	1.95326e-11	8.32764e-14	5.32801e-09	5.0908e-10	0.00366602	1.56299e-05	0.00189031	0.095548		93.1268	3.80558	1.28596
212	2022-03-09 14:16:45	8285524	3.08417e-11	2.42028e-11	5.2965e-09	9.18588e-12	1.38982e-09	1.99854e-11	4.84056e-14	5.27002e-09	4.82268e-10	0.00379229	9.18509e-06	0.00174305	0.0915116		92.607	3.66931	1.23564
213	2022-03-09 14:17:26	8326622	3.02397e-11	3.2301e-11	5.23643e-09	8.16355e-12	1.32239e-09	1.95953e-11	6.4602e-14	5.21025e-09	4.58869e-10	0.00376092	1.2399e-05	0.00156683	0.0880705		92.3821	3.4354	1.15316
214	2022-03-09 14:18:07	8367719	2.00917e-11	2.83083e-11	5.15557e-09	7.87438e-12	1.26133e-09	1.30194e-11	5.66166e-14	5.12979e-09	4.37682e-10	0.002538	1.10368e-05	0.00153503	0.0853215		94.5699	3.47281	1.17604
215	2022-03-09 14:18:48	8408817	3.73024e-11	3.19223e-11	5.27464e-09	7.1638e-12	1.22294e-09	2.4172e-11	6.38446e-14	5.24827e-09	4.2436e-10	0.0046057	1.21649e-05	0.00136498	0.0808572		90.0751	3.26554	1.0842
216	2022-03-09 14:19:29	8449914	2.10162e-11	2.41004e-11	5.11766e-09	6.69832e-12	1.19678e-09	1.36185e-11	4.82008e-14	5.09207e-09	4.15283e-10	0.00267445	9.46585e-06	0.00131544	0.0815548		94.0265	3.12474	1.05226
217	2022-03-09 14:20:11	8491012	2.11129e-11	3.97749e-11	5.11094e-09	6.29412e-12	1.18154e-09	1.36812e-11	7.95498e-14	5.08539e-09	4.09994e-10	0.00269029	1.56428e-05	0.00123769	0.0806221		93.9198	2.97832	1.00111
218	2022-03-09 14:20:52	8532109	2.20159e-11	3.59766e-11	5.1047e-09	6.11675e-12	1.13259e-09	1.42663e-11	7.19532e-14	5.07918e-09	3.93009e-10	0.00280878	1.41663e-05	0.00120428	0.0773765		93.4233	3.01828	1.01302
219	2022-03-09 14:21:33	8573207	1.35342e-11	3.28949e-11	5.11092e-09	5.68352e-12	1.10619e-09	8.77016e-12	6.57898e-14	5.08537e-09	3.83848e-10	0.00172459	1.29371e-05	0.00111762	0.0754809		95.7511	2.87569	0.972248
220	2022-03-09 14:22:14	8614304	1.21259e-11	2.92194e-11	5.05124e-09	5.461e-12	1.11147e-09	7.85758e-12	5.84388e-14	5.02598e-09	3.8568e-10	0.00156339	1.16273e-05	0.00108655	0.0767372		96.1891	2.75349	0.931265
221	2022-03-09 14:22:55	8655402	1.77589e-11	3.85156e-11	5.05471e-09	5.5083e-12	1.07476e-09	1.15078e-11	7.70312e-14	5.02944e-09	3.72942e-10	0.00228808	1.53161e-05	0.00109521	0.0741518		94.3458	2.86864	0.964746
222	2022-03-09 14:23:36	8696499	2.88959e-11	6.17253e-11	5.04619e-09	5.35027e-12	1.07932e-09	1.87245e-11	1.23451e-13	5.02096e-09	3.74524e-10	0.00372928	2.45871e-05	0.00106559	0.0745921		91.1425	2.77685	0.921551
223	2022-03-09 14:24:17	8737597	2.30909e-11	3.9867e-11	5.02332e-09	5.25352e-12	1.0546e-09	1.49629e-11	7.9734e-14	4.9982e-09	3.65946e-10	0.00299366	1.59525e-05	0.00105108	0.0732155		92.6374	2.79047	0.931604
224	2022-03-09 14:24:58	8778694	1.74579e-11	3.72358e-11	5.02365e-09	4.16777e-12	1.04357e-09	1.13127e-11	7.44716e-14	4.99853e-09	3.62119e-10	0.00226321	1.48987e-05	0.000833799	0.072445		94.2451	2.24963	0.751589
225	2022-03-09 14:25:39	8819792	2.72404e-11	3.74509e-11	5.46181e-09	4.6999e-12	1.02281e-09	1.76518e-11	7.49018e-14	5.4345e-09	3.54915e-10	0.0032481	1.37826e-05	0.000864826	0.0653078		91.1673	2.5796	0.854431
226	2022-03-09 14:26:19	8859849	-6.36399e-12	4.39725e-11	5.82094e-09	4.29677e-12	1.02186e-09	-4.12387e-12	8.7945e-14	5.79184e-09	3.54585e-10	-0.000712014	1.51843e-05	0.000741867	0.0612216		102.323	2.36563	0.814093
227	2022-03-09 14:27:00	8900947	2.81112e-11	3.18404e-11	5.04599e-08	4.95897e-12	1.13486e-09	1.82161e-11	6.36808e-14	5.02076e-08	3.93796e-10	0.000362815	1.26835e-06	9.87693e-05	0.00784336		91.7239	2.45629	0.814358
228	2022-03-09 14:27:43	8943064	2.24029e-11	2.10904e-11	3.20887e-07	4.25915e-12	9.16271e-10	1.45171e-11	4.21808e-14	3.19283e-07	3.17946e-10	4.54678e-05	1.32111e-07	1.33398e-05	0.000995814		91.8338	2.60892	0.866637
229	2022-03-09 14:28:22	8982582	5.18149e-12	2.27797e-11	3.94793e-07	3.5862e-12	8.18371e-10	3.35761e-12	4.55594e-14	3.92819e-07	2.83975e-10	8.54746e-06	1.15981e-07	9.12939e-06	0.000722915		97.7459	2.46311	0.835277
230	2022-03-09 14:29:01	9021079	2.20159e-11	3.28744e-11	3.8897e-07	1.00123e-10	3.44889e-09	1.42663e-11	6.57488e-14	3.87025e-07	1.19676e-09	3.68614e-05	1.69882e-07	0.000258699	0.00309221		97.9986	14.3332	5.53335
231	2022-03-09 14:29:44	9064908	9.06704e-09	2.88918e-11	3.65858e-07	2.75125e-10	4.85034e-09	5.87544e-09	5.77836e-14	3.64029e-07	1.68307e-09	0.0161401	1.58734e-07	0.000755778	0.00462345		15.9706	24.6376	3.27527
232	2022-03-09 14:30:18	9098324	1.19922e-08	3.46866e-11	3.56988e-07	2.90666e-10	3.45344e-09	7.77095e-09	6.93732e-14	3.55203e-07	1.19834e-09	0.0218775	1.95306e-07	0.000818309	0.00337369		10.2747	32.6638	3.03774
233	2022-03-09 14:30:48	9128092	1.24954e-08	4.33685e-11	3.52778e-07	2.83748e-10	2.58804e-09	8.09702e-09	8.6737e-14	3.51014e-07	8.9805e-10	0.0230675	2.47104e-07	0.000808366	0.00255844		8.29932	38.7202	3.00449
234	2022-03-09 14:31:17	9157859	1.27137e-08	2.99361e-11	3.84222e-07	2.46727e-10	2.09313e-09	8.23848e-09	5.98722e-14	3.82301e-07	7.26316e-10	0.0215497	1.5661e-07	0.000645374	0.00189985		6.89295	40.4527	2.64502
235	2022-03-09 14:31:50	9190216	6.01303e-09	1.92783e-11	4.20592e-07	9.05419e-11	1.48796e-09	3.89644e-09	3.85566e-14	4.18489e-07	5.16322e-10	0.00931074	9.21329e-08	0.000216354	0.00123378		8.21457	25.9639	1.93841
236	2022-03-09 14:32:22	9222082	1.86113e-09	1.7937e-11	4.69774e-07	3.61866e-11	1.20397e-09	1.20601e-09	3.5874e-14	4.67425e-07	4.17778e-10	0.00258012	7.67481e-08	7.74169e-05	0.000893785		16.8901	14.7644	1.9745
237	2022-03-09 14:33:01	9261490	5.28049e-10	2.81137e-11	3.20887e-07	1.81395e-11	2.18804e-09	3.42176e-10	5.62274e-14	3.19283e-07	7.5925e-10	0.0010717	1.76105e-07	5.68133e-05	0.00237799		53.7581	4.56004	1.22475
238	2022-03-09 14:33:39	9299987	1.30418e-10	4.17304e-11	5.12142e-08	1.78342e-11	2.43087e-09	8.45109e-11	8.34608e-14	5.09581e-08	8.43512e-10	0.00165844	1.63783e-06	0.000349978	0.016553		83.8764	4.05662	1.32123
239	2022-03-09 14:34:19	9339504	4.37739e-11	4.36244e-11	1.23523e-08	1.62959e-11	2.1548e-09	2.83655e-11	8.72488e-14	1.22905e-08	7.47716e-10	0.00230791	7.09886e-06	0.00132589	0.0608367		93.2231	4.17632	1.41706
240	2022-03-09 14:34:58	9378502	5.07829e-11	2.91069e-11	6.68837e-09	1.44426e-11	1.91964e-09	3.29073e-11	5.82138e-14	6.65493e-09	6.66115e-10	0.0049448	8.74747e-06	0.00217021	0.100094		91.3501	4.15579	1.39933
241	2022-03-09 14:35:40	9420619	3.26907e-11	4.07168e-11	5.72478e-09	1.26463e-11	1.73308e-09	2.11836e-11	8.14336e-14	5.69616e-09	6.01379e-10	0.00371892	1.42962e-05	0.00222015	0.105576		93.6682	4.0355	1.3697
242	2022-03-09 14:36:21	9461717	3.27229e-11	4.58256e-11	5.46718e-09	1.06554e-11	1.58551e-09	2.12044e-11	9.16512e-14	5.43984e-09	5.50172e-10	0.00389799	1.68481e-05	0.00195877	0.101137		93.0928	3.72844	1.25875
243	2022-03-09 14:37:02	9502814	2.73802e-11	4.05325e-11	5.30383e-09	9.92655e-12	1.49169e-09	1.77424e-11	8.1065e-14	5.27731e-09	5.17616e-10	0.00336201	1.5361e-05	0.00188099	0.0980834		93.8076	3.69325	1.24987
244	2022-03-09 14:37:43	9543912	2.03712e-11	3.65294e-11	5.25197e-09	8.70105e-12	1.3909e-09	1.32005e-11	7.30588e-14	5.22571e-09	4.82642e-10	0.00252608	1.39806e-05	0.00166505	0.0923592		94.9857	3.4796	1.18028
245	2022-03-09 14:38:25	9585009	4.39781e-11	3.03047e-11	5.19704e-09	8.07325e-12	1.30692e-09	2.84978e-11	6.06094e-14	5.17105e-09	4.53501e-10	0.00551102	1.17209e-05	0.00156124	0.0876999		89.1788	3.43756	1.13903
246	2022-03-09 14:39:06	9626107	2.41122e-11	4.1802e-11	5.20316e-09	7.81202e-12	1.25832e-09	1.56247e-11	8.3604e-14	5.17714e-09	4.36637e-10	0.00301802	1.61487e-05	0.00150894	0.0843394		93.5381	3.45401	1.16489
247	2022-03-09 14:39:47	9667204	2.75092e-11	3.77785e-11	5.08299e-09	7.2799e-12	1.22425e-09	1.7826e-11	7.5557e-14	5.05758e-09	4.24815e-10	0.00352461	1.49394e-05	0.00143941	0.0839957		92.4959	3.31319	1.11129
248	2022-03-09 14:40:28	9708302	3.14007e-11	3.33147e-11	5.04356e-09	6.65102e-12	1.19341e-09	2.03477e-11	6.66294e-14	5.01834e-09	4.14113e-10	0.00405466	1.32772e-05	0.00132534	0.0825199		91.3077	3.11172	1.03671
249	2022-03-09 14:41:09	9749399	2.53162e-11	4.34913e-11	5.07365e-09	6.3253e-12	1.15131e-09	1.64049e-11	8.69826e-14	5.04828e-09	3.99505e-10	0.0032496	1.72301e-05	0.00125296	0.0791367		92.6279	3.06873	1.02733
250	2022-03-09 14:41:50	9790497	2.68319e-11	3.22397e-11	5.03567e-09	6.07697e-12	1.13463e-09	1.73871e-11	6.44794e-14	5.01049e-09	3.93717e-10	0.00347013	1.28689e-05	0.00121285	0.0785784		92.1095	2.99406	0.999511
251	2022-03-09 14:42:31	9831594	9.97598e-12	2.75302e-11	5.02546e-09	5.94045e-12	1.11688e-09	6.46444e-12	5.50604e-14	5.00033e-09	3.87557e-10	0.0012928	1.10113e-05	0.00118801	0.0775063		96.8651	2.97399	1.01058
252	2022-03-09 14:43:12	9872692	1.65549e-11	3.19428e-11	4.98327e-09	5.64805e-12	1.09011e-09	1.07276e-11	6.38856e-14	4.95835e-09	3.78268e-10	0.00216354	1.28844e-05	0.0011391	0.0762891		94.7808	2.8992	0.976898
253	2022-03-09 14:43:53	9913789	2.15214e-11	5.23472e-11	5.01704e-09	5.69105e-12	1.07908e-09	1.39459e-11	1.04694e-13	4.99195e-09	3.74441e-10	0.00279367	2.09726e-05	0.00114004	0.0750088		93.2599	2.94928	0.988614
254	2022-03-09 14:44:34	9954887	2.49399e-11	5.29513e-11	5.02578e-09	4.99875e-12	1.06864e-09	1.61611e-11	1.05903e-13	5.00065e-09	3.70818e-10	0.00323179	2.11778e-05	0.00099962	0.074154		92.1784	2.62456	0.873234
255	2022-03-09 14:45:15	9995984	2.69609e-11	3.10316e-11	5.0258e-09	5.02347e-12	1.04501e-09	1.74707e-11	6.20632e-14	5.00067e-09	3.62618e-10	0.00349366	1.2411e-05	0.00100456	0.072514		91.429	2.69552	0.894764
256	2022-03-09 14:45:57	10037082	1.08682e-11	3.69287e-11	4.9762e-09	5.03852e-12	1.04596e-09	7.04259e-12	7.38574e-14	4.95132e-09	3.62948e-10	0.00142237	1.49167e-05	0.00101761	0.0733033		96.3621	2.7009	0.9136
257	2022-03-09 14:46:38	10078179	1.61464e-11	2.42642e-11	5.45319e-09	4.84072e-12	1.02653e-09	1.04629e-11	4.85284e-14	5.42592e-09	3.56206e-10	0.00192831	8.9438e-06	0.000892147	0.0656489		94.5909	2.64567	0.888538
258	2022-03-09 14:47:19	10119277	3.53674e-12	4.68801e-11	5.83047e-09	4.4419e-12	1.00205e-09	2.29181e-12	9.37602e-14	5.80132e-09	3.47711e-10	0.000395049	1.61619e-05	0.000765671	0.0599366		98.7313	2.49063	0.847843
259	2022-03-09 14:48:00	10160374	3.61199e-12	3.11237e-11	5.04196e-08	4.4634e-12	1.13943e-09	2.34057e-12	6.22474e-14	5.01675e-08	3.95382e-10	4.66551e-05	1.24079e-06	8.89699e-05	0.00788124		98.8556	2.20758	0.749591
260	2022-03-09 14:48:42	10202492	1.38997e-11	2.30356e-11	3.05837e-07	4.17637e-12	9.07029e-10	9.00701e-12	4.60712e-14	3.04308e-07	3.14739e-10	2.95983e-05	1.51397e-07	1.37242e-05	0.00103428		94.7197	2.58488	0.868018
261	2022-03-09 14:49:22	10242009	-6.69723e-12	3.21987e-11	3.89328e-07	3.6679e-12	8.26286e-10	-4.33981e-12	6.43974e-14	3.87381e-07	2.86721e-10	-1.12029e-05	1.66238e-07	9.46845e-06	0.000740152		103.041	2.49414	0.861466
262	2022-03-09 14:50:00	10280507	1.51682e-11	3.20451e-11	4.02676e-07	8.83725e-11	3.1271e-09	9.82899e-12	6.40902e-14	4.00663e-07	1.0851e-09	2.45318e-05	1.59961e-07	0.000220566	0.00270827		98.4661	14.0061	5.39674
263	2022-03-09 14:50:44	10324335	8.65625e-09	3.71334e-11	3.64513e-07	2.7445e-10	4.91153e-09	5.60925e-09	7.42668e-14	3.6269e-07	1.7043e-09	0.0154657	2.04766e-07	0.000756706	0.00469905		16.7259	24.3601	3.36099
264	2022-03-09 14:51:17	10357753	1.18801e-08	3.32942e-11	3.59855e-07	2.88514e-10	3.4334e-09	7.6983e-09	6.65884e-14	3.58056e-07	1.19139e-09	0.0215003	1.85972e-07	0.00080578	0.00332739		10.3028	32.6284	3.04166
265	2022-03-09 14:51:47	10387519	1.26708e-08	2.58307e-11	3.55287e-07	2.7935e-10	2.55864e-09	8.21068e-09	5.16614e-14	3.53511e-07	8.87848e-10	0.0232261	1.46138e-07	0.000790217	0.00251152		8.09606	38.6216	2.92744
266	2022-03-09 14:52:17	10417285	1.26842e-08	3.20861e-11	3.98107e-07	2.3573e-10	2.02414e-09	8.21936e-09	6.41722e-14	3.96116e-07	7.02377e-10	0.0207499	1.62003e-07	0.000595103	0.00177316		6.66511	40.1618	2.54212
267	2022-03-09 14:52:49	10449642	5.69409e-09	3.13285e-11	4.19428e-07	8.53916e-11	1.46564e-09	3.68977e-09	6.2657e-14	4.17331e-07	5.08577e-10	0.00884136	1.50137e-07	0.000204614	0.00121864		8.43065	25.1365	1.91776
268	2022-03-09 14:53:21	10481509	1.7637e-09	2.19299e-11	4.66638e-07	3.61963e-11	1.1945e-09	1.14288e-09	4.38598e-14	4.64305e-07	4.14491e-10	0.00246148	9.44634e-08	7.79581e-05	0.000892714		17.5616	14.8672	2.0512
269	2022-03-09 14:54:00	10520916	4.97713e-10	4.06144e-11	3.20438e-07	1.74623e-11	2.13129e-09	3.22518e-10	8.12288e-14	3.18836e-07	7.39558e-10	0.00101155	2.54767e-07	5.47689e-05	0.00231956		54.5621	4.50894	1.21952
270	2022-03-09 14:54:39	10559414	1.41577e-10	4.40647e-11	5.12779e-08	1.87641e-11	2.404e-09	9.17419e-11	8.81294e-14	5.10215e-08	8.34188e-10	0.0017981	1.7273e-06	0.000367768	0.0163497		82.6129	4.30466	1.39711
271	2022-03-09 14:55:18	10598932	6.69938e-11	3.28642e-11	1.2485e-08	1.7258e-11	2.11845e-09	4.3412e-11	6.57284e-14	1.24226e-08	7.35102e-10	0.0034946	5.29104e-06	0.00138924	0.0591747		89.863	4.48444	1.5058
272	2022-03-09 14:55:57	10637929	4.87941e-11	2.78169e-11	6.66307e-09	1.50414e-11	1.90429e-09	3.16186e-11	5.56338e-14	6.62975e-09	6.60789e-10	0.00476919	8.39153e-06	0.00226877	0.0996701		91.6149	4.35398	1.47057
273	2022-03-09 14:56:40	10680047	3.72271e-11	2.70388e-11	5.73063e-09	1.30451e-11	1.69973e-09	2.41232e-11	5.40776e-14	5.70198e-09	5.89806e-10	0.00423067	9.48401e-06	0.00228782	0.103439		92.7361	4.23576	1.43533
274	2022-03-09 14:57:21	10721144	3.78291e-11	4.0553e-11	5.48252e-09	1.13638e-11	1.57495e-09	2.45133e-11	8.1106e-14	5.45511e-09	5.46508e-10	0.00449363	1.48679e-05	0.00208315	0.100183		92.0713	3.99209	1.34592
275	2022-03-09 14:58:02	10762242	2.66062e-11	2.78988e-11	5.37456e-09	9.81153e-12	1.47692e-09	1.72408e-11	5.57976e-14	5.34769e-09	5.12491e-10	0.00322398	1.0434e-05	0.00183472	0.0958342		93.9148	3.68737	1.24828
276	2022-03-09 14:58:43	10803339	2.95624e-11	1.64218e-11	5.30839e-09	9.32993e-12	1.39222e-09	1.91564e-11	3.28436e-14	5.28185e-09	4.831e-10	0.00362684	6.2182e-06	0.00176641	0.0914643		92.9064	3.71864	1.25432
277	2022-03-09 14:59:24	10844437	2.52517e-11	2.68442e-11	5.38417e-09	8.03455e-12	1.32611e-09	1.63631e-11	5.36884e-14	5.35725e-09	4.6016e-10	0.00305439	1.00216e-05	0.00149975	0.0858949		93.5706	3.37386	1.13702
278	2022-03-09 15:00:05	10885534	2.59504e-11	3.87409e-11	5.51681e-09	7.43362e-12	1.26469e-09	1.68159e-11	7.74818e-14	5.48923e-09	4.38847e-10	0.00306343	1.41153e-05	0.00135422	0.0799471		93.1001	3.27622	1.10107
279	2022-03-09 15:00:46	10926632	2.68212e-11	3.72972e-11	5.13973e-09	7.15197e-12	1.21538e-09	1.73801e-11	7.45944e-14	5.11403e-09	4.21737e-10	0.00339852	1.45862e-05	0.0013985	0.0824666		92.618	3.27985	1.10026
280	2022-03-09 15:01:27	10967729	3.44644e-11	3.18609e-11	5.07857e-09	6.63597e-12	1.18634e-09	2.23329e-11	6.37218e-14	5.05318e-09	4.1166e-10	0.00441958	1.26102e-05	0.00131323	0.0814656		90.4898	3.12284	1.03711
281	2022-03-09 15:02:08	11008827	2.72619e-11	4.10956e-11	5.07479e-09	6.5962e-12	1.14926e-09	1.76657e-11	8.21912e-14	5.04942e-09	3.98793e-10	0.00349857	1.62774e-05	0.00130633	0.0789781		92.1029	3.20151	1.07099
282	2022-03-09 15:02:49	11049924	2.56279e-11	3.48094e-11	5.13522e-09	6.20705e-12	1.12011e-09	1.66069e-11	6.96188e-14	5.10954e-09	3.88678e-10	0.00325017	1.36252e-05	0.0012148	0.0760691		92.3537	3.09454	1.0351
283	2022-03-09 15:03:31	11091022	1.74794e-11	4.08294e-11	4.98673e-09	5.98345e-12	1.10679e-09	1.13267e-11	8.16588e-14	4.9618e-09	3.84056e-10	0.00228277	1.64575e-05	0.0012059	0.0774026		94.5904	3.02115	1.01854
284	2022-03-09 15:04:12	11132119	2.90034e-11	3.35604e-11	4.99548e-09	5.7104e-12	1.06708e-09	1.87942e-11	6.71208e-14	4.9705e-09	3.70277e-10	0.00378115	1.35038e-05	0.00114886	0.0744948		91.0366	2.99158	0.994422
285	2022-03-09 15:04:52	11172177	9.47073e-12	2.1674e-11	4.94378e-09	5.35027e-12	1.06661e-09	6.13703e-12	4.3348e-14	4.91906e-09	3.70114e-10	0.0012476	8.81225e-06	0.00108766	0.0752407		96.8779	2.80959	0.953143
286	2022-03-09 15:05:33	11213274	2.16719e-11	4.0901e-11	4.95773e-09	5.4868e-12	1.04105e-09	1.40434e-11	8.1802e-14	4.93294e-09	3.61244e-10	0.00284686	1.65828e-05	0.00111228	0.073231		92.9851	2.94752	0.986922
287	2022-03-09 15:06:14	11254372	1.82534e-11	3.06528e-11	4.91889e-09	5.6287e-12	1.02269e-09	1.18282e-11	6.13056e-14	4.8943e-09	3.54873e-10	0.00241673	1.25259e-05	0.00115005	0.0725076		93.9319	3.07418	1.03437
288	2022-03-09 15:06:55	11295469	7.34223e-12	3.96725e-11	4.91627e-09	5.30942e-12	1.00734e-09	4.75777e-12	7.9345e-14	4.89169e-09	3.49547e-10	0.000972622	1.62204e-05	0.0010854	0.0714573		97.4266	2.94767	1.00345
289	2022-03-09 15:07:36	11336567	1.59314e-11	3.50142e-11	5.39251e-09	4.9493e-12	9.88379e-10	1.03235e-11	7.00284e-14	5.36555e-09	3.42968e-10	0.00192404	1.30515e-05	0.000922422	0.0639203		94.4732	2.80464	0.943065
290	2022-03-09 15:08:17	11377664	1.11799e-11	2.71309e-11	5.75139e-09	4.68485e-12	9.91143e-10	7.24458e-12	5.42618e-14	5.72263e-09	3.43927e-10	0.00126595	9.48196e-06	0.000818653	0.0600994		96.061	2.65167	0.895488
291	2022-03-09 15:08:58	11418762	2.28007e-11	4.17713e-11	3.20158e-08	4.49027e-12	1.09167e-09	1.47749e-11	8.35426e-14	3.18557e-08	3.78809e-10	0.000463805	2.62253e-06	0.000140956	0.0118914		92.9209	2.31533	0.77016
292	2022-03-09 15:09:39	11459839	1.20507e-11	2.5114e-11	3.0718e-07	4.1882e-12	9.17471e-10	7.80885e-12	5.0228e-14	3.05644e-07	3.18362e-10	2.55488e-05	1.64335e-07	1.37029e-05	0.00104161		95.4388	2.56324	0.862875
293	2022-03-09 15:10:19	11499357	2.71974e-12	1.41388e-11	3.89238e-07	3.96352e-12	8.13807e-10	1.76239e-12	2.82776e-14	3.87292e-07	2.82391e-10	4.55055e-06	7.30137e-08	1.02339e-05	0.000729143		98.8006	2.7302	0.931797
294	2022-03-09 15:10:57	11537854	6.08449e-12	3.2209e-11	4.04826e-07	6.77723e-11	2.47046e-09	3.94275e-12	6.4418e-14	4.02802e-07	8.5725e-10	9.78831e-06	1.59925e-07	0.000168252	0.00212822		99.212	13.652	5.25428
295	2022-03-09 15:11:41	11581683	8.27449e-09	3.02126e-11	3.63528e-07	2.66185e-10	4.75832e-09	5.36187e-09	6.04252e-14	3.6171e-07	1.65114e-09	0.0148237	1.67054e-07	0.000735906	0.0045648		16.9173	24.3807	3.39582
296	2022-03-09 15:12:15	11615100	1.17201e-08	3.19734e-11	3.60751e-07	2.8906e-10	3.46424e-09	7.59462e-09	6.39468e-14	3.58947e-07	1.20209e-09	0.0211581	1.78151e-07	0.000805299	0.00334894		10.491	32.4736	3.07583
297	2022-03-09 15:12:44	11644867	1.25929e-08	2.94242e-11	3.52868e-07	2.80626e-10	2.59824e-09	8.1602e-09	5.88484e-14	3.51104e-07	9.01589e-10	0.0232416	1.6761e-07	0.000799268	0.00256787		8.22626	38.3657	2.95004
298	2022-03-09 15:13:14	11674634	1.27319e-08	3.51063e-11	3.48388e-07	2.00274e-10	1.78563e-09	8.25027e-09	7.02126e-14	3.46646e-07	6.19614e-10	0.0238003	2.02548e-07	0.000577748	0.00178745		5.82298	39.2605	2.1817
299	2022-03-09 15:13:46	11706990	1.74955e-09	3.62018e-11	6.16444e-08	3.57512e-11	1.22281e-09	1.13371e-09	7.24036e-14	6.13362e-08	4.24315e-10	0.0184835	1.18044e-06	0.000582873	0.00691786		17.9455	14.419	2.01959
300	2022-03-09 15:14:27	11747420	7.36674e-10	4.6532e-11	5.02998e-08	2.78779e-11	1.18658e-09	4.77365e-10	9.3064e-14	5.00483e-08	4.11743e-10	0.00953808	1.85948e-06	0.00055702	0.00822692		32.8753	11.924	2.54587
301	2022-03-09 15:15:06	11786417	6.28347e-10	5.3453e-11	5.22376e-08	2.56548e-11	1.18634e-09	4.07169e-10	1.06906e-13	5.19764e-08	4.1166e-10	0.00783372	2.05682e-06	0.000493585	0.00792013		36.2511	11.0802	2.50361
302	2022-03-09 15:15:45	11825414	5.73952e-10	3.45534e-11	5.59116e-08	2.34264e-11	1.18994e-09	3.71921e-10	6.91068e-14	5.5632e-08	4.12909e-10	0.00668537	1.24221e-06	0.000421095	0.00742215		38.2023	10.1891	2.36315
303	2022-03-09 15:16:24	11864412	4.77589e-10	4.25494e-11	6.20481e-08	2.37016e-11	1.18262e-09	3.09478e-10	8.50988e-14	6.17379e-08	4.10369e-10	0.00501277	1.37839e-06	0.000383907	0.00664696		42.5197	10.3533	2.56213
304	2022-03-09 15:17:03	11903409	4.83254e-10	3.77375e-11	6.86565e-08	2.09743e-11	1.16126e-09	3.13149e-10	7.5475e-14	6.83132e-08	4.02957e-10	0.00458401	1.10484e-06	0.000307031	0.00589867		41.5374	9.42705	2.28572
305	2022-03-09 15:17:42	11942407	3.98136e-10	2.59126e-11	7.12908e-08	1.83986e-11	1.15646e-09	2.57992e-10	5.18252e-14	7.09343e-08	4.01292e-10	0.00363706	7.30608e-07	0.000259375	0.00565723		45.9207	8.39849	2.13948
306	2022-03-09 15:18:21	11981404	2.96559e-10	2.77451e-11	6.73972e-08	1.56014e-11	1.13847e-09	1.9217e-10	5.54902e-14	6.70602e-08	3.95049e-10	0.00286564	8.27468e-07	0.000232648	0.00589096		52.5885	7.31932	1.98802

## Sheet:  Intergration
Index	Time	ms	Ethylene mbar	Carbon monoxide mbar	Argon mbar	Ethylene oxide mbar	Carbon dioxide mbar	Corrected Et	Corrected CO	Corrected Ar	Corrected CO2	Et (ć)	CO (ć)	EtO (ć)	CO2 (ć)		Time, min	Initial time	6.42665e+07	Et (ć) Integral	CO (ć) Integral	EtO (ć) Integral	CO2 (ć) Integral
1	2022-03-09 11:58:55	15189	5.72114e-11	5.84901e-11	5.32357e-09	1.35976e-11	1.44837e-09	3.7073e-11	1.1698e-13	5.29695e-09	5.02584e-10	0.00699893	2.20844e-05	0.00256706	0.0948818		0	0		0	0	0	0
2	2022-03-09 11:59:47	67767	3.78829e-11	4.67675e-11	6.45741e-09	9.18803e-12	1.57135e-09	2.45481e-11	9.3535e-14	6.42512e-09	5.45258e-10	0.00382065	1.45577e-05	0.00143002	0.0848635		0.866667	0.866667		0.00468848	1.58783e-05	0.00173207	0.0778896
3	2022-03-09 12:00:28	108864	4.01296e-11	5.22756e-11	3.07717e-07	6.6994e-12	1.22857e-09	2.6004e-11	1.04551e-13	3.06178e-07	4.26314e-10	8.49308e-05	3.41471e-07	2.18807e-05	0.00139237		1.55	1.55		0.00602289	2.09688e-05	0.00222813	0.10736
4	2022-03-09 12:01:11	151502	1.78557e-11	3.81163e-11	4.12082e-07	5.29115e-12	1.00157e-09	1.15705e-11	7.62326e-14	4.10022e-07	3.47545e-10	2.82192e-05	1.85923e-07	1.29046e-05	0.000847626		2.26667	2.26667		0.00606343	2.11578e-05	0.0022406	0.108163
5	2022-03-09 12:01:49	189999	2.03282e-11	3.38061e-11	4.23997e-07	5.86552e-11	3.34354e-09	1.31727e-11	6.76122e-14	4.21877e-07	1.16021e-09	3.1224e-05	1.60265e-07	0.000139034	0.00275011		2.9	2.9		0.00608226	2.12674e-05	0.00228871	0.109302
6	2022-03-09 12:02:33	233828	9.79406e-09	6.8595e-11	4.01601e-07	3.33931e-10	1.54094e-08	6.34655e-09	1.3719e-13	3.99593e-07	5.34706e-09	0.0158825	3.43324e-07	0.000835678	0.0133813		3.63333	3.63333		0.0119173	2.14521e-05	0.0026461	0.115217
7	2022-03-09 12:03:07	267275	1.32607e-08	5.47737e-11	3.97033e-07	3.99516e-10	1.09865e-08	8.59293e-09	1.09547e-13	3.95048e-07	3.81232e-09	0.0217516	2.77302e-07	0.00101131	0.00965026		4.2	4.2		0.0225803	2.16279e-05	0.00316942	0.121743
8	2022-03-09 12:03:37	297003	1.43667e-08	6.0251e-11	3.85476e-07	3.96414e-10	7.42979e-09	9.30962e-09	1.20502e-13	3.83549e-07	2.57814e-09	0.0242723	3.14177e-07	0.00103354	0.0067218		4.7	4.7		0.0340863	2.17758e-05	0.00368063	0.125836
9	2022-03-09 12:04:06	326730	1.47214e-08	6.2657e-11	3.81176e-07	3.77056e-10	5.67351e-09	9.53947e-09	1.25314e-13	3.7927e-07	1.96871e-09	0.0251522	3.30408e-07	0.000994162	0.00519078		5.18333	5.18333		0.0460306	2.19316e-05	0.00417066	0.128715
10	2022-03-09 12:04:35	355867	8.17299e-09	4.97775e-11	3.47134e-07	1.71249e-10	3.14989e-09	5.2961e-09	9.9555e-14	3.45398e-07	1.09301e-09	0.0153333	2.88232e-07	0.000495801	0.0031645		5.66667	5.66667		0.0558146	2.20811e-05	0.00453073	0.130734
11	2022-03-09 12:05:07	387734	2.93131e-09	3.53828e-11	3.58063e-07	8.57581e-11	2.28894e-09	1.89949e-09	7.07656e-14	3.56273e-07	7.94262e-10	0.00533156	1.98628e-07	0.000240709	0.00222937		6.2	6.2		0.0613252	2.22109e-05	0.00472714	0.132172
12	2022-03-09 12:05:39	419602	1.17829e-09	2.59126e-11	3.84849e-07	4.7028e-11	1.87981e-09	7.63532e-10	5.18252e-14	3.82925e-07	6.52294e-10	0.00199395	1.3534e-07	0.000122813	0.00170345		6.73333	6.73333		0.0632787	2.22999e-05	0.00482408	0.133221
13	2022-03-09 12:06:19	459010	4.07832e-10	3.67444e-11	3.01537e-07	2.56978e-11	2.31689e-09	2.64275e-10	7.34888e-14	3.00029e-07	8.03961e-10	0.000880831	2.44939e-07	8.5651e-05	0.00267961		7.4	7.4		0.0642369	2.24267e-05	0.00489356	0.134682
14	2022-03-09 12:06:57	497507	1.30827e-10	3.87715e-11	6.61376e-08	1.92468e-11	2.59656e-09	8.47759e-11	7.7543e-14	6.58069e-08	9.01006e-10	0.00128825	1.17834e-06	0.000292474	0.0136917		8.03333	8.03333		0.0649238	2.28774e-05	0.0050133	0.139866
15	2022-03-09 12:07:37	537024	7.76901e-11	2.3353e-11	1.82189e-08	1.71462e-11	2.34449e-09	5.03432e-11	4.6706e-14	1.81278e-08	8.13538e-10	0.00277713	2.57648e-06	0.000945851	0.0448779		8.7	8.7		0.0662789	2.4129e-05	0.00542608	0.159389
16	2022-03-09 12:08:16	576022	3.30024e-11	4.31432e-11	8.65817e-09	1.50478e-11	2.11629e-09	2.13856e-11	8.62864e-14	8.61488e-09	7.34353e-10	0.0024824	1.0016e-05	0.00174672	0.0852424		9.35	9.35		0.0679883	2.82216e-05	0.00630116	0.201679
17	2022-03-09 12:08:55	615019	4.73644e-11	4.64091e-11	6.53502e-09	1.36815e-11	1.91209e-09	3.06921e-11	9.28182e-14	6.50234e-09	6.63495e-10	0.00472016	1.42746e-05	0.00210409	0.102039		10	10		0.0703291	3.6116e-05	0.00755268	0.262545
18	2022-03-09 12:09:37	657137	2.29512e-11	4.95215e-11	6.02053e-09	1.26796e-11	1.75911e-09	1.48724e-11	9.9043e-14	5.99043e-09	6.10411e-10	0.00248269	1.65335e-05	0.00211664	0.101898		10.7	10.7		0.0728501	4.68988e-05	0.00902993	0.333923
19	2022-03-09 12:10:18	698234	2.71437e-11	3.85872e-11	5.89089e-09	1.18658e-11	1.63469e-09	1.75891e-11	7.71744e-14	5.86144e-09	5.67237e-10	0.00300082	1.31665e-05	0.00202438	0.0967745		11.3833	11.3833		0.0747236	5.70463e-05	0.0104448	0.401803
20	2022-03-09 12:10:59	739332	2.50474e-11	3.54544e-11	5.74876e-09	1.10875e-11	1.57147e-09	1.62307e-11	7.09088e-14	5.72002e-09	5.453e-10	0.00283753	1.23966e-05	0.00193837	0.0953319		12.0667	12.0667		0.0767184	6.57804e-05	0.0117987	0.467439
21	2022-03-09 12:11:40	780429	2.51227e-11	3.57923e-11	5.69654e-09	1.06747e-11	1.49409e-09	1.62795e-11	7.15846e-14	5.66806e-09	5.18449e-10	0.00287215	1.26295e-05	0.00188331	0.0914686		12.75	12.75		0.0786692	7.4331e-05	0.0131045	0.531263
22	2022-03-09 12:12:21	821527	4.82029e-11	5.10572e-11	6.24088e-09	1.07543e-11	1.56847e-09	3.12355e-11	1.02114e-13	6.20968e-09	5.44259e-10	0.00503013	1.64444e-05	0.00173186	0.0876469		13.4333	13.4333		0.0813691	8.42645e-05	0.0143396	0.59246
23	2022-03-09 12:13:02	862624	1.75439e-11	5.06375e-11	6.25709e-09	1.00587e-11	1.50572e-09	1.13684e-11	1.01275e-13	6.2258e-09	5.22485e-10	0.00182602	1.6267e-05	0.00161565	0.0839225		14.1167	14.1167		0.0837117	9.54409e-05	0.0154834	0.65108
24	2022-03-09 12:13:43	903722	2.03174e-11	2.75199e-11	6.19641e-09	9.7094e-12	1.46769e-09	1.31657e-11	5.50398e-14	6.16543e-09	5.09288e-10	0.0021354	8.92717e-06	0.00157481	0.0826039		14.8	14.8		0.0850652	0.000104049	0.0165735	0.707976
25	2022-03-09 12:14:24	944819	2.69824e-11	4.82725e-11	6.17011e-09	9.41915e-12	1.41706e-09	1.74846e-11	9.6545e-14	6.13926e-09	4.9172e-10	0.002848	1.57258e-05	0.00153425	0.0800943		15.4833	15.4833		0.0867678	0.000112472	0.0176357	0.763565
26	2022-03-09 12:15:05	985917	3.04009e-11	4.55082e-11	6.13946e-09	8.98378e-12	1.38442e-09	1.96998e-11	9.10164e-14	6.10876e-09	4.80394e-10	0.00322484	1.48993e-05	0.00147064	0.0786401		16.1667	16.1667		0.0888427	0.000122936	0.0186624	0.817799
27	2022-03-09 12:15:47	1027014	2.30049e-11	4.92451e-11	6.11673e-09	8.8107e-12	1.36703e-09	1.49072e-11	9.84902e-14	6.08615e-09	4.74359e-10	0.00244936	1.61827e-05	0.00144766	0.0779408		16.8667	16.8667		0.0908287	0.000133814	0.0196838	0.872603
28	2022-03-09 12:16:28	1068112	1.78879e-11	4.62966e-11	6.04875e-09	8.32695e-12	1.33295e-09	1.15914e-11	9.25932e-14	6.01851e-09	4.62534e-10	0.00192595	1.53847e-05	0.00138356	0.0768519		17.55	17.55		0.0923236	0.0001446	0.0206511	0.92549
29	2022-03-09 12:17:09	1109209	3.60984e-11	4.39315e-11	6.06898e-09	8.36135e-12	1.30464e-09	2.33918e-11	8.7863e-14	6.03864e-09	4.5271e-10	0.00387368	1.45501e-05	0.00138464	0.0749689		18.2333	18.2333		0.0943051	0.000154828	0.0215969	0.977362
30	2022-03-09 12:17:50	1150307	1.76299e-11	4.29077e-11	6.07707e-09	8.20547e-12	1.30308e-09	1.14242e-11	8.58154e-14	6.04668e-09	4.52169e-10	0.00188933	1.41921e-05	0.00135702	0.0747796		18.9167	18.9167		0.0962741	0.000164648	0.0225337	1.02853
31	2022-03-09 12:18:31	1191404	1.17819e-11	3.74713e-11	6.0737e-09	7.89695e-12	1.2846e-09	7.63467e-12	7.49426e-14	6.04333e-09	4.45756e-10	0.00126332	1.24009e-05	0.00130672	0.07376		19.6	19.6		0.0973513	0.000173734	0.0234438	1.07928
32	2022-03-09 12:19:12	1232502	2.54344e-11	5.1733e-11	6.58888e-09	7.99155e-12	1.27741e-09	1.64815e-11	1.03466e-13	6.55594e-09	4.43261e-10	0.00251398	1.5782e-05	0.00121898	0.0676122		20.2833	20.2833		0.0986419	0.000183363	0.0243067	1.12758
33	2022-03-09 12:19:53	1273599	2.80574e-11	5.07091e-11	5.59148e-09	7.4992e-12	1.24525e-09	1.81812e-11	1.01418e-13	5.56352e-09	4.32102e-10	0.00326793	1.82291e-05	0.00134792	0.0776669		20.9667	20.9667		0.100617	0.000194984	0.0251837	1.17722
34	2022-03-09 12:20:34	1314697	1.58132e-11	4.3952e-11	6.0014e-09	7.21647e-12	1.23913e-09	1.0247e-11	8.7904e-14	5.97139e-09	4.29978e-10	0.00171601	1.47209e-05	0.00120851	0.0720063		21.65	21.65		0.10232	0.000206241	0.0260572	1.22836
35	2022-03-09 12:21:15	1355794	2.92937e-11	4.58666e-11	2.05773e-07	6.71552e-12	1.21069e-09	1.89823e-11	9.17332e-14	2.04744e-07	4.20109e-10	9.27124e-05	4.48038e-07	3.27996e-05	0.00205188		22.3333	22.3333		0.102938	0.000211424	0.0264813	1.25366
36	2022-03-09 12:21:58	1398434	1.11369e-11	4.05837e-11	3.5242e-07	6.20167e-12	1.04332e-09	7.21671e-12	8.11674e-14	3.50658e-07	3.62032e-10	2.05805e-05	2.31472e-07	1.76858e-05	0.00103244		23.05	23.05		0.102979	0.000211668	0.0264994	1.25476
37	2022-03-09 12:22:36	1436932	2.46174e-11	2.78169e-11	3.92016e-07	5.52765e-12	9.59579e-10	1.59521e-11	5.56338e-14	3.90056e-07	3.32974e-10	4.08969e-05	1.4263e-07	1.41714e-05	0.000853657		23.6833	23.6833		0.102998	0.000211786	0.0265095	1.25536
38	2022-03-09 12:23:15	1475429	3.04938e-09	4.38701e-11	3.65141e-07	2.26807e-10	6.59974e-09	1.976e-09	8.77402e-14	3.63315e-07	2.29011e-09	0.0054388	2.41499e-07	0.00062427	0.00630337		24.3333	24.3333		0.104779	0.000211911	0.026717	1.25769
39	2022-03-09 12:24:00	1520809	1.17671e-08	5.39137e-11	3.76876e-07	3.36108e-10	5.24531e-09	7.62508e-09	1.07827e-13	3.74992e-07	1.82012e-09	0.020334	2.87546e-07	0.000896308	0.00485377		25.0833	25.0833		0.114444	0.000212109	0.0272872	1.26187
40	2022-03-09 12:24:30	1550575	1.33205e-08	4.36347e-11	3.69709e-07	3.32327e-10	3.81433e-09	8.63168e-09	8.72694e-14	3.6786e-07	1.32357e-09	0.0234646	2.37235e-07	0.000903405	0.00359803		25.5833	25.5833		0.125394	0.000212241	0.0277371	1.26398
41	2022-03-09 12:25:00	1580342	1.38633e-08	3.48606e-11	3.68634e-07	3.23237e-10	2.97196e-09	8.98342e-09	6.97212e-14	3.66791e-07	1.03127e-09	0.0244919	1.90084e-07	0.000881257	0.0028116		26.0833	26.0833		0.137383	0.000212347	0.0281833	1.26559
42	2022-03-09 12:25:30	1610109	1.05793e-08	3.29358e-11	3.32263e-07	1.70865e-10	2.10393e-09	6.85539e-09	6.58716e-14	3.30602e-07	7.30064e-10	0.0207361	1.99248e-07	0.00051683	0.00220829		26.5833	26.5833		0.14869	0.000212445	0.0285328	1.26684
43	2022-03-09 12:26:02	1642466	3.60814e-09	3.58639e-11	3.36026e-07	7.92168e-11	1.68281e-09	2.33807e-09	7.17278e-14	3.34346e-07	5.83935e-10	0.00699298	2.14532e-07	0.000236931	0.0017465		27.1167	27.1167		0.156084	0.000212555	0.0287338	1.2679
44	2022-03-09 12:26:34	1674332	1.44273e-09	3.84337e-11	3.6747e-07	4.08779e-11	1.48136e-09	9.34889e-10	7.68674e-14	3.65633e-07	5.14032e-10	0.00255691	2.10231e-07	0.0001118	0.00140587		27.65	27.65		0.158631	0.000212668	0.0288268	1.26874
45	2022-03-09 12:27:13	1713740	5.1086e-10	2.10802e-11	3.60662e-07	2.09485e-11	1.68917e-09	3.31037e-10	4.21604e-14	3.58859e-07	5.86142e-10	0.000922473	1.17485e-07	5.83753e-05	0.00163335		28.3	28.3		0.159762	0.000212775	0.0288821	1.26972
46	2022-03-09 12:27:52	1752237	1.95681e-10	3.1912e-11	9.80933e-08	1.68947e-11	2.43555e-09	1.26801e-10	6.3824e-14	9.76028e-08	8.45136e-10	0.00129916	6.53915e-07	0.000173096	0.00865893		28.95	28.95		0.160484	0.000213025	0.0289573	1.27307
47	2022-03-09 12:28:30	1790734	8.30006e-11	5.26749e-11	2.52221e-08	1.56735e-11	2.28989e-09	5.37844e-11	1.0535e-13	2.5096e-08	7.94592e-10	0.00214315	4.19787e-06	0.000624542	0.0316621		29.5833	29.5833		0.161574	0.000214562	0.0292099	1.28584
48	2022-03-09 12:29:10	1830252	4.53326e-11	3.77375e-11	1.05769e-08	1.37084e-11	2.07958e-09	2.93755e-11	7.5475e-14	1.0524e-08	7.21614e-10	0.00279128	7.17169e-06	0.00130258	0.0685683		30.25	30.25		0.163218	0.000218352	0.0298523	1.31925
49	2022-03-09 12:29:49	1869249	3.26907e-11	4.8508e-11	7.28335e-09	1.23076e-11	1.88497e-09	2.11836e-11	9.7016e-14	7.24693e-09	6.54085e-10	0.00292311	1.33872e-05	0.00169832	0.0902567		30.9	30.9		0.165076	0.000225033	0.0308276	1.37087
50	2022-03-09 12:30:31	1911367	3.37656e-11	3.8751e-11	6.59267e-09	1.12337e-11	1.74616e-09	2.18801e-11	7.7502e-14	6.55971e-09	6.05918e-10	0.00333553	1.18149e-05	0.00171253	0.0923696		31.6	31.6		0.167266	0.000233854	0.0320214	1.43478
51	2022-03-09 12:31:12	1952464	2.52839e-11	4.60815e-11	6.34779e-09	1.03167e-11	1.66014e-09	1.6384e-11	9.2163e-14	6.31605e-09	5.76069e-10	0.00259402	1.45919e-05	0.00163341	0.0912071		32.2833	32.2833		0.169292	0.000242876	0.0331646	1.49751
52	2022-03-09 12:31:53	1993562	4.36556e-11	3.1523e-11	6.24417e-09	9.53955e-12	1.54447e-09	2.82888e-11	6.3046e-14	6.21295e-09	5.35931e-10	0.0045532	1.01475e-05	0.00153543	0.0862603		32.9667	32.9667		0.171734	0.000251329	0.0342473	1.55814
53	2022-03-09 12:32:34	2034659	3.86784e-11	4.42591e-11	6.17608e-09	8.93325e-12	1.47033e-09	2.50636e-11	8.85182e-14	6.1452e-09	5.10205e-10	0.00407857	1.44044e-05	0.0014537	0.0830249		33.65	33.65		0.174683	0.000259718	0.0352686	1.61598
54	2022-03-09 12:33:15	2075757	2.35424e-11	3.48709e-11	6.14317e-09	8.68278e-12	1.41238e-09	1.52555e-11	6.97418e-14	6.11245e-09	4.90096e-10	0.0024958	1.14098e-05	0.00142051	0.0801799		34.3333	34.3333		0.17693	0.000268537	0.0362506	1.67174
55	2022-03-09 12:33:56	2116854	5.27931e-11	4.73715e-11	6.11904e-09	7.9593e-12	1.37039e-09	3.42099e-11	9.4743e-14	6.08844e-09	4.75525e-10	0.00561883	1.55611e-05	0.00130728	0.0781029		35.0167	35.0167		0.179702	0.000277753	0.0371826	1.72582
56	2022-03-09 12:34:37	2157952	2.32522e-11	4.00513e-11	6.09105e-09	7.81847e-12	1.34111e-09	1.50674e-11	8.01026e-14	6.06059e-09	4.65365e-10	0.00248613	1.3217e-05	0.00129005	0.0767854		35.7	35.7		0.182471	0.000287585	0.03807	1.77874
57	2022-03-09 12:35:19	2199049	3.15189e-11	5.17637e-11	6.03951e-09	7.2455e-12	1.29372e-09	2.04242e-11	1.03527e-13	6.00931e-09	4.48921e-10	0.00339877	1.72278e-05	0.00120571	0.0747042		36.4	36.4		0.184531	0.000298241	0.0389435	1.83176
58	2022-03-09 12:36:00	2240147	2.86594e-11	3.42566e-11	6.01822e-09	7.04662e-12	1.29372e-09	1.85713e-11	6.85132e-14	5.98813e-09	4.48921e-10	0.00310135	1.14415e-05	0.00117676	0.0749685		37.0833	37.0833		0.186752	0.000308036	0.0397575	1.8829
59	2022-03-09 12:36:41	2281244	3.00032e-11	2.6967e-11	6.03593e-09	6.44032e-12	1.27069e-09	1.94421e-11	5.3934e-14	6.00575e-09	4.40929e-10	0.00323724	8.98039e-06	0.00107236	0.0734179		37.7667	37.7667		0.188917	0.000315014	0.040526	1.9336
60	2022-03-09 12:37:22	2322342	3.34217e-11	4.06758e-11	5.80618e-09	6.75637e-12	1.22665e-09	2.16573e-11	8.13516e-14	5.77715e-09	4.25648e-10	0.00374878	1.40816e-05	0.0011695	0.0736778		38.45	38.45		0.191304	0.000322893	0.0412919	1.98386
61	2022-03-09 12:38:03	2363439	1.76729e-11	3.35706e-11	6.0402e-09	6.21887e-12	1.24393e-09	1.1452e-11	6.71412e-14	6.01e-09	4.31644e-10	0.0019055	1.11716e-05	0.00103475	0.0718209		39.1333	39.1333		0.193236	0.000331521	0.0420451	2.03357
62	2022-03-09 12:38:44	2404537	4.24301e-11	4.63887e-11	6.05303e-09	6.1877e-12	1.21454e-09	2.74947e-11	9.27774e-14	6.02276e-09	4.21445e-10	0.00456513	1.54045e-05	0.00102739	0.0699754		39.8167	39.8167		0.195447	0.000340601	0.0427496	2.08202
63	2022-03-09 12:39:25	2445634	1.71032e-11	3.33453e-11	5.321e-09	6.22532e-12	1.19474e-09	1.10829e-11	6.66906e-14	5.2944e-09	4.14575e-10	0.00209332	1.25965e-05	0.00117583	0.0783045		40.5	40.5		0.197722	0.000350168	0.0435024	2.13268
64	2022-03-09 12:40:06	2486732	1.35772e-11	4.66856e-11	7.06073e-09	6.02215e-12	1.1795e-09	8.79803e-12	9.33712e-14	7.02543e-09	4.09286e-10	0.00125231	1.32905e-05	0.000857194	0.0582579		41.1833	41.1833		0.198865	0.000359013	0.044197	2.17934
65	2022-03-09 12:40:47	2527829	1.29107e-11	3.35809e-11	5.47863e-09	5.85337e-12	1.16931e-09	8.36613e-12	6.71618e-14	5.45124e-09	4.05751e-10	0.00153472	1.23205e-05	0.00107377	0.0744328		41.8667	41.8667		0.199817	0.000367763	0.0448568	2.22467
66	2022-03-09 12:41:28	2568927	2.06399e-11	3.77068e-11	5.93371e-09	5.977e-12	1.14963e-09	1.33747e-11	7.54136e-14	5.90404e-09	3.98922e-10	0.00226534	1.27732e-05	0.00101236	0.0675675		42.55	42.55		0.201116	0.000376337	0.0455695	2.27319
67	2022-03-09 12:42:10	2610024	1.59314e-11	4.04813e-11	1.69402e-07	5.36102e-12	1.19006e-09	1.03235e-11	8.09626e-14	1.68555e-07	4.12951e-10	6.12474e-05	4.80333e-07	3.18058e-05	0.00244995		43.25	43.25		0.20193	0.000380976	0.045935	2.2977
68	2022-03-09 12:42:52	2652662	1.09004e-11	2.95983e-11	3.42655e-07	5.2202e-12	1.01045e-09	7.06346e-12	5.91966e-14	3.40942e-07	3.50626e-10	2.07175e-05	1.73627e-07	1.53111e-05	0.0010284		43.95	43.95		0.201959	0.000381205	0.0459515	2.29891
69	2022-03-09 12:43:31	2691159	1.69849e-12	1.42718e-11	3.9757e-07	4.50855e-12	9.16629e-10	1.10062e-12	2.85436e-14	3.95582e-07	3.1807e-10	2.78228e-06	7.21559e-08	1.13973e-05	0.000804056		44.6	44.6		0.201966	0.000381285	0.0459601	2.29951
70	2022-03-09 12:44:09	2729657	7.34825e-10	4.55082e-11	3.92105e-07	1.67589e-10	5.07458e-09	4.76167e-10	9.10164e-14	3.90144e-07	1.76088e-09	0.00122049	2.33289e-07	0.000429556	0.0045134		45.2333	45.2333		0.202354	0.000381381	0.0460998	2.30119
71	2022-03-09 12:44:55	2775036	1.08016e-08	4.4638e-11	3.69709e-07	3.0948e-10	4.94476e-09	6.99944e-09	8.9276e-14	3.6786e-07	1.71583e-09	0.0190274	2.4269e-07	0.000841297	0.00466435		46	46		0.210115	0.000381564	0.0465869	2.30471
72	2022-03-09 12:45:24	2804802	1.26076e-08	2.63016e-11	3.62812e-07	3.14431e-10	3.57462e-09	8.16972e-09	5.26032e-14	3.60998e-07	1.24039e-09	0.0226309	1.45716e-07	0.000871005	0.00343601		46.4833	46.4833		0.220183	0.000381658	0.0470007	2.30667
73	2022-03-09 12:45:54	2834569	1.32352e-08	3.37651e-11	3.60483e-07	3.05665e-10	2.77436e-09	8.57641e-09	6.75302e-14	3.58681e-07	9.62703e-10	0.023911	1.88274e-07	0.000852193	0.00268401		46.9833	46.9833		0.231818	0.000381741	0.0474315	2.3082
74	2022-03-09 12:46:24	2864335	1.37149e-08	3.81982e-11	3.60572e-07	1.99154e-10	2.07321e-09	8.88726e-09	7.63964e-14	3.58769e-07	7.19404e-10	0.0247715	2.1294e-07	0.000555103	0.0020052		47.4833	47.4833		0.243989	0.000381841	0.0477834	2.30937
75	2022-03-09 12:46:56	2896692	4.50484e-09	3.95496e-11	3.82162e-07	8.71599e-11	1.63482e-09	2.91914e-09	7.90992e-14	3.80251e-07	5.67283e-10	0.00767686	2.08018e-07	0.000229217	0.00149186		48.0167	48.0167		0.252642	0.000381954	0.0479925	2.3103
76	2022-03-09 12:47:28	2928559	1.43469e-09	3.9652e-11	3.86999e-07	3.99728e-11	1.35419e-09	9.29679e-10	7.9304e-14	3.85064e-07	4.69904e-10	0.00241435	2.0595e-07	0.000103808	0.00122033		48.55	48.55		0.255333	0.000382064	0.0480813	2.31103
77	2022-03-09 12:48:07	2967966	5.50517e-10	2.63937e-11	3.19991e-07	1.81051e-11	2.01035e-09	3.56735e-10	5.27874e-14	3.18391e-07	6.97591e-10	0.00112043	1.65794e-07	5.68644e-05	0.00219099		49.2	49.2		0.256482	0.000382185	0.0481336	2.31214
78	2022-03-09 12:48:46	3006464	1.56605e-10	2.70183e-11	6.75753e-08	1.76224e-11	2.64083e-09	1.0148e-10	5.40366e-14	6.72374e-08	9.16368e-10	0.00150928	8.03669e-07	0.000262092	0.0136288		49.85	49.85		0.257336	0.0003825	0.0482372	2.31728
79	2022-03-09 12:49:25	3045982	7.46693e-11	3.45534e-11	1.46927e-08	1.61035e-11	2.35109e-09	4.83857e-11	6.91068e-14	1.46192e-08	8.15828e-10	0.00330973	4.72711e-06	0.00110153	0.0558051		50.5	50.5		0.258902	0.000384298	0.0486804	2.33984
80	2022-03-09 12:50:04	3084979	6.04901e-11	3.0704e-11	6.93029e-09	1.4248e-11	2.05366e-09	3.91976e-11	6.1408e-14	6.89564e-09	7.1262e-10	0.0056844	8.90534e-06	0.00206623	0.103344		51.15	51.15		0.261826	0.000388728	0.0497099	2.39157
81	2022-03-09 12:50:47	3127097	3.72916e-11	3.46149e-11	5.80705e-09	1.22958e-11	1.85917e-09	2.4165e-11	6.92298e-14	5.77801e-09	6.45132e-10	0.00418222	1.19816e-05	0.00212803	0.111653		51.8667	51.8667		0.265361	0.000396213	0.0512129	2.46861
82	2022-03-09 12:51:28	3168194	3.30777e-11	3.35604e-11	5.50918e-09	1.11466e-11	1.71616e-09	2.14343e-11	6.71208e-14	5.48163e-09	5.95508e-10	0.00391021	1.22447e-05	0.00203344	0.108637		52.55	52.55		0.268126	0.00040449	0.0526347	2.54387
83	2022-03-09 12:52:09	3209292	3.94631e-11	3.68366e-11	5.39457e-09	1.03458e-11	1.59534e-09	2.55721e-11	7.36732e-14	5.3676e-09	5.53583e-10	0.00476416	1.37255e-05	0.00192745	0.103134		53.2333	53.2333		0.27109	0.000413363	0.053988	2.61623
84	2022-03-09 12:52:50	3250389	2.40584e-11	4.7648e-11	5.30609e-09	9.69865e-12	1.53044e-09	1.55898e-11	9.5296e-14	5.27956e-09	5.31063e-10	0.00295287	1.805e-05	0.00183702	0.100588		53.9167	53.9167		0.273726	0.00042422	0.0552742	2.68583
85	2022-03-09 12:53:31	3291487	2.53162e-11	4.83339e-11	5.32432e-09	8.74943e-12	1.44105e-09	1.64049e-11	9.66678e-14	5.2977e-09	5.00044e-10	0.00309661	1.82471e-05	0.00165155	0.094389		54.6	54.6		0.275793	0.000436621	0.0564661	2.75245
86	2022-03-09 12:54:12	3332584	3.61199e-11	4.49553e-11	5.22263e-09	8.213e-12	1.38874e-09	2.34057e-11	8.99106e-14	5.19652e-09	4.81893e-10	0.00450411	1.73021e-05	0.00158048	0.0927338		55.2833	55.2833		0.27839	0.000448767	0.0575704	2.81638
87	2022-03-09 12:54:53	3373682	1.05349e-11	2.67009e-11	5.1393e-09	7.55617e-12	1.32539e-09	6.82662e-12	5.34018e-14	5.1136e-09	4.5991e-10	0.00133499	1.04431e-05	0.00147766	0.0899386		55.9667	55.9667		0.280385	0.000458247	0.0586153	2.8788
88	2022-03-09 12:55:34	3414779	2.58537e-11	5.69339e-11	5.13469e-09	7.3659e-12	1.29336e-09	1.67532e-11	1.13868e-13	5.10902e-09	4.48796e-10	0.00327914	2.22876e-05	0.00144175	0.0878439		56.65	56.65		0.281962	0.00046943	0.0596127	2.93954
89	2022-03-09 12:56:15	3455877	1.40824e-11	3.8618e-11	5.09972e-09	7.04985e-12	1.24789e-09	9.1254e-12	7.7236e-14	5.07422e-09	4.33018e-10	0.00179838	1.52213e-05	0.00138935	0.0853368		57.3333	57.3333		0.283697	0.000482245	0.06058	2.99871
90	2022-03-09 12:56:56	3496974	2.75629e-11	4.27439e-11	5.04642e-09	6.94665e-12	1.22366e-09	1.78608e-11	8.54878e-14	5.02119e-09	4.2461e-10	0.00355708	1.70254e-05	0.00138347	0.0845637		58.0167	58.0167		0.285526	0.000493263	0.0615274	3.05676
91	2022-03-09 12:57:38	3538072	2.99387e-11	4.83032e-11	5.04889e-09	6.50375e-12	1.20278e-09	1.94003e-11	9.66064e-14	5.02365e-09	4.17365e-10	0.00386179	1.92303e-05	0.00129463	0.08308		58.7167	58.7167		0.288123	0.000505952	0.0624647	3.11544
92	2022-03-09 12:58:19	3579169	2.55312e-11	4.70644e-11	5.04792e-09	6.22747e-12	1.17566e-09	1.65442e-11	9.41288e-14	5.02268e-09	4.07954e-10	0.0032939	1.87408e-05	0.00123987	0.0812224		59.4	59.4		0.290568	0.000518926	0.0633307	3.17157
93	2022-03-09 12:59:00	3620267	1.95327e-11	3.37344e-11	5.02428e-09	6.27692e-12	1.14723e-09	1.26572e-11	6.74688e-14	4.99916e-09	3.98089e-10	0.00253186	1.3496e-05	0.0012556	0.0796312		60.0833	60.0833		0.292558	0.00052994	0.0641833	3.22653
94	2022-03-09 12:59:41	3661364	3.36044e-11	3.56694e-11	5.07344e-09	6.07267e-12	1.15683e-09	2.17757e-11	7.13388e-14	5.04807e-09	4.0142e-10	0.00431366	1.41319e-05	0.00120297	0.0795195		60.7667	60.7667		0.294897	0.00053938	0.0650233	3.28091
95	2022-03-09 13:00:22	3702462	2.94119e-11	4.50372e-11	5.11006e-09	5.59645e-12	1.12515e-09	1.90589e-11	9.00744e-14	5.08451e-09	3.90427e-10	0.00374843	1.77155e-05	0.00110069	0.0767876		61.45	61.45		0.297652	0.000550261	0.0658104	3.33431
96	2022-03-09 13:01:03	3743559	2.40907e-11	4.35528e-11	5.09443e-09	5.27932e-12	1.10379e-09	1.56108e-11	8.71056e-14	5.06896e-09	3.83015e-10	0.00307968	1.71841e-05	0.0010415	0.0755609		62.1333	62.1333		0.299985	0.000562185	0.0665423	3.38636
97	2022-03-09 13:01:44	3784657	2.08979e-11	4.50987e-11	5.46286e-09	5.22665e-12	1.10895e-09	1.35418e-11	9.01974e-14	5.43555e-09	3.84806e-10	0.00249135	1.6594e-05	0.000961569	0.0707943		62.8167	62.8167		0.301888	0.000573726	0.0672267	3.43637
98	2022-03-09 13:02:25	3825754	2.59074e-12	3.82494e-11	5.94135e-09	4.88802e-12	1.11747e-09	1.6788e-12	7.64988e-14	5.91164e-09	3.87762e-10	0.000283982	1.29404e-05	0.000826846	0.0655929		63.5	63.5		0.302836	0.000583817	0.0678377	3.48297
99	2022-03-09 13:03:06	3866852	8.56773e-12	4.36039e-11	1.07141e-07	4.9321e-12	1.17446e-09	5.55189e-12	8.72078e-14	1.06605e-07	4.07538e-10	5.20789e-05	8.18044e-07	4.62651e-05	0.00382286		64.1833	64.1833		0.302951	0.000588517	0.068136	3.50668
100	2022-03-09 13:03:49	3909490	1.58992e-11	3.30485e-11	3.37101e-07	4.57305e-12	1.00217e-09	1.03027e-11	6.6097e-14	3.35415e-07	3.47753e-10	3.07162e-05	1.9706e-07	1.3634e-05	0.00103678		64.9	64.9		0.302981	0.000588881	0.0681575	3.50843
101	2022-03-09 13:04:27	3947987	1.07392e-11	1.96264e-11	3.9757e-07	4.09682e-12	8.85079e-10	6.959e-12	3.92528e-14	3.95582e-07	3.07122e-10	1.75918e-05	9.92279e-08	1.03564e-05	0.000776381		65.5333	65.5333		0.302996	0.000588975	0.0681651	3.509
102	2022-03-09 13:05:06	3986484	2.37488e-10	3.00283e-11	3.97838e-07	1.45565e-10	4.35327e-09	1.53892e-10	6.00566e-14	3.95849e-07	1.51058e-09	0.000388765	1.51716e-07	0.000367729	0.00381606		66.1833	66.1833		0.303128	0.000589057	0.068288	3.51049
103	2022-03-09 13:05:50	4030313	1.02786e-08	2.47147e-11	3.68276e-07	2.93124e-10	4.73768e-09	6.66053e-09	4.94294e-14	3.66435e-07	1.64397e-09	0.0181766	1.34893e-07	0.000799935	0.00448641		66.9167	66.9167		0.309935	0.000589162	0.0687161	3.51354
104	2022-03-09 13:06:23	4063730	1.24337e-08	3.99387e-11	3.62095e-07	3.03618e-10	3.35169e-09	8.05704e-09	7.98774e-14	3.60285e-07	1.16304e-09	0.022363	2.21706e-07	0.000842717	0.00322811		67.4667	67.4667		0.321084	0.00058926	0.0691679	3.51566
105	2022-03-09 13:06:53	4093497	1.31015e-08	2.34451e-11	3.57257e-07	2.94894e-10	2.59644e-09	8.48977e-09	4.68902e-14	3.55471e-07	9.00965e-10	0.0238832	1.3191e-07	0.000829587	0.00253457		67.9667	67.9667		0.332645	0.000589348	0.0695859	3.5171
106	2022-03-09 13:07:23	4123264	1.37398e-08	3.7973e-11	3.50538e-07	1.91919e-10	1.95359e-09	8.90339e-09	7.5946e-14	3.48785e-07	6.77896e-10	0.0255269	2.17744e-07	0.00055025	0.00194359		68.4667	68.4667		0.344998	0.000589435	0.0699309	3.51822
107	2022-03-09 13:07:54	4154580	4.55249e-09	3.89968e-11	3.25993e-07	9.13019e-11	1.58154e-09	2.95001e-09	7.79936e-14	3.24363e-07	5.48794e-10	0.00909479	2.40452e-07	0.000281481	0.00169191		68.9833	68.9833		0.353942	0.000589554	0.0701458	3.51916
108	2022-03-09 13:08:26	4186447	1.94622e-09	3.26901e-11	4.52395e-07	3.86785e-11	1.28436e-09	1.26115e-09	6.53802e-14	4.50133e-07	4.45673e-10	0.00280173	1.45246e-07	8.59268e-05	0.000990092		69.5167	69.5167		0.357114	0.000589657	0.0702437	3.51987
109	2022-03-09 13:09:05	4225855	5.53538e-10	2.8257e-11	3.48478e-07	1.84394e-11	2.1794e-09	3.58693e-10	5.6514e-14	3.46736e-07	7.56252e-10	0.00103448	1.62989e-07	5.318e-05	0.00218106		70.1667	70.1667		0.358361	0.000589757	0.0702889	3.5209
110	2022-03-09 13:09:44	4264352	1.45479e-10	1.81521e-11	5.65478e-08	1.69925e-11	2.54401e-09	9.42704e-11	3.63042e-14	5.62651e-08	8.82771e-10	0.00167547	6.45235e-07	0.000302008	0.0156895		70.8167	70.8167		0.359242	0.00059002	0.0704044	3.52671
111	2022-03-09 13:10:23	4303869	6.48116e-11	1.8838e-11	1.37078e-08	1.53875e-11	2.24359e-09	4.19979e-11	3.7676e-14	1.36393e-08	7.78526e-10	0.00307919	2.76232e-06	0.00112818	0.0570798		71.4667	71.4667		0.360787	0.000591127	0.0708692	3.55036
112	2022-03-09 13:11:02	4342867	5.06754e-11	4.44025e-11	6.92229e-09	1.40588e-11	1.99763e-09	3.28377e-11	8.8805e-14	6.88768e-09	6.93178e-10	0.00476759	1.28933e-05	0.00204115	0.10064		72.1167	72.1167		0.363337	0.000596215	0.0718992	3.60162
113	2022-03-09 13:11:44	4384984	4.18926e-11	4.56004e-11	5.91653e-09	1.25549e-11	1.8353e-09	2.71464e-11	9.12008e-14	5.88695e-09	6.36849e-10	0.00461129	1.5492e-05	0.00213267	0.10818		72.8167	72.8167		0.36662	0.00060615	0.0733601	3.67471
114	2022-03-09 13:12:26	4426082	2.90679e-11	2.91478e-11	5.54174e-09	1.10606e-11	1.69361e-09	1.8836e-11	5.82956e-14	5.51403e-09	5.87683e-10	0.00341601	1.05722e-05	0.0020059	0.106579		73.5167	73.5167		0.369429	0.000615272	0.0748086	3.74987
115	2022-03-09 13:13:07	4467179	3.40666e-11	4.43923e-11	5.41884e-09	9.70188e-12	1.56595e-09	2.20752e-11	8.87846e-14	5.39175e-09	5.43385e-10	0.00409425	1.64668e-05	0.00179939	0.100781		74.2	74.2		0.371995	0.000624511	0.0761087	3.82072
116	2022-03-09 13:13:48	4508277	3.37656e-11	3.56899e-11	5.30454e-09	9.0945e-12	1.47896e-09	2.18801e-11	7.13798e-14	5.27802e-09	5.13199e-10	0.00414552	1.3524e-05	0.00172309	0.0972333		74.8833	74.8833		0.374811	0.000634758	0.0773122	3.88838
117	2022-03-09 13:14:29	4549374	3.09492e-11	3.5782e-11	5.25086e-09	8.18828e-12	1.39102e-09	2.00551e-11	7.1564e-14	5.22461e-09	4.82684e-10	0.00383858	1.36975e-05	0.00156725	0.0923867		75.5667	75.5667		0.377539	0.000644058	0.0784364	3.95316
118	2022-03-09 13:15:10	4590472	2.16504e-11	4.29282e-11	5.1948e-09	7.8905e-12	1.33679e-09	1.40295e-11	8.58564e-14	5.16883e-09	4.63866e-10	0.00271424	1.66104e-05	0.00152656	0.089743		76.25	76.25		0.379777	0.000654413	0.0794935	4.01539
119	2022-03-09 13:15:51	4631569	2.91109e-11	4.1802e-11	5.25904e-09	7.41427e-12	1.29228e-09	1.88639e-11	8.3604e-14	5.23274e-09	4.48421e-10	0.00360497	1.59771e-05	0.0014169	0.0856952		76.9333	76.9333		0.381937	0.000665548	0.0804991	4.07533
120	2022-03-09 13:16:32	4672667	5.10301e-11	4.03585e-11	5.21918e-09	7.23475e-12	1.24885e-09	3.30675e-11	8.0717e-14	5.19308e-09	4.33351e-10	0.0063676	1.55432e-05	0.00139315	0.0834477		77.6167	77.6167		0.385344	0.000676317	0.0814592	4.13312
121	2022-03-09 13:17:13	4713764	2.45099e-11	2.91683e-11	5.13264e-09	6.61017e-12	1.22269e-09	1.58824e-11	5.83366e-14	5.10698e-09	4.24273e-10	0.00310994	1.14229e-05	0.00129434	0.0830772		78.3	78.3		0.388582	0.00068553	0.0823775	4.19002
122	2022-03-09 13:17:54	4754862	2.60794e-11	3.62325e-11	5.2007e-09	6.57362e-12	1.18814e-09	1.68995e-11	7.2465e-14	5.1747e-09	4.12285e-10	0.00326579	1.40037e-05	0.00127034	0.0796732		78.9833	78.9833		0.39076	0.000694218	0.0832537	4.24562
123	2022-03-09 13:18:35	4795959	2.41659e-11	3.95087e-11	5.10652e-09	6.14577e-12	1.15514e-09	1.56595e-11	7.90174e-14	5.08099e-09	4.00834e-10	0.00308198	1.55516e-05	0.00120956	0.0788889		79.6667	79.6667		0.392929	0.000704316	0.084101	4.2998
124	2022-03-09 13:19:17	4837057	1.24269e-11	4.25596e-11	5.10795e-09	5.94367e-12	1.16906e-09	8.05263e-12	8.51192e-14	5.08241e-09	4.05664e-10	0.00158441	1.67478e-05	0.00116946	0.0798172		80.3667	80.3667		0.394562	0.000715621	0.0849337	4.35535
125	2022-03-09 13:19:58	4878154	2.05217e-11	2.36397e-11	5.10187e-09	5.19225e-12	1.13955e-09	1.32981e-11	4.72794e-14	5.07636e-09	3.95424e-10	0.00261961	9.31364e-06	0.00102283	0.0778951		81.05	81.05		0.395999	0.000724525	0.0856827	4.40923
126	2022-03-09 13:20:39	4919252	1.86512e-11	4.30204e-11	5.64815e-09	5.13312e-12	1.11243e-09	1.2086e-11	8.60408e-14	5.61991e-09	3.86013e-10	0.00215056	1.531e-05	0.000913381	0.0686867		81.7333	81.7333		0.397629	0.000732938	0.0863443	4.45931
127	2022-03-09 13:21:20	4960349	2.82079e-11	4.23753e-11	5.06309e-09	5.30405e-12	1.11364e-09	1.82787e-11	8.47506e-14	5.03777e-09	3.86433e-10	0.00362833	1.6823e-05	0.00105286	0.0767071		82.4167	82.4167		0.399603	0.000743917	0.0870161	4.50899
128	2022-03-09 13:22:01	5001447	2.11559e-11	5.05351e-11	5.18068e-09	4.38815e-12	1.09551e-09	1.3709e-11	1.0107e-13	5.15478e-09	3.80142e-10	0.00265948	1.96071e-05	0.000851278	0.0737456		83.1	83.1		0.401751	0.000756364	0.0876666	4.5604
129	2022-03-09 13:22:42	5042544	1.87372e-11	3.02945e-11	5.46388e-09	4.74505e-12	1.07812e-09	1.21417e-11	6.0589e-14	5.43656e-09	3.74108e-10	0.00223334	1.11447e-05	0.000872804	0.0688133		83.7833	83.7833		0.403423	0.000766871	0.0882557	4.6091
130	2022-03-09 13:23:23	5083642	2.11882e-11	3.00283e-11	5.91705e-09	4.76547e-12	1.0786e-09	1.373e-11	6.00566e-14	5.88746e-09	3.74274e-10	0.00233207	1.02008e-05	0.000809427	0.0635714		84.4667	84.4667		0.404983	0.000774164	0.0888305	4.65433
131	2022-03-09 13:24:04	5124739	2.95409e-11	3.6939e-11	7.9785e-08	5.0138e-12	1.15406e-09	1.91425e-11	7.3878e-14	7.93861e-08	4.00459e-10	0.000241132	9.30617e-07	6.31572e-05	0.00504445		85.15	85.15		0.405862	0.000777967	0.0891286	4.67778
132	2022-03-09 13:24:46	5166857	5.77274e-12	1.55413e-11	3.31816e-07	4.34085e-12	9.51064e-10	3.74074e-12	3.10826e-14	3.30157e-07	3.30019e-10	1.13302e-05	9.41449e-08	1.31478e-05	0.000999583		85.85	85.85		0.40595	0.000778326	0.0891553	4.67989
133	2022-03-09 13:25:26	5206374	9.78248e-12	3.3417e-11	3.97122e-07	3.88505e-12	8.54121e-10	6.33905e-12	6.6834e-14	3.95136e-07	2.9638e-10	1.60427e-05	1.69142e-07	9.83217e-06	0.00075007		86.5167	86.5167		0.40596	0.000778413	0.089163	4.68048
134	2022-03-09 13:26:04	5244872	8.62256e-11	2.98132e-11	4.00078e-07	1.32322e-10	3.93046e-09	5.58742e-11	5.96264e-14	3.98078e-07	1.36387e-09	0.00014036	1.49786e-07	0.000332403	0.00342614		87.15	87.15		0.406009	0.000778514	0.0892713	4.6818
135	2022-03-09 13:26:48	5288700	9.80463e-09	3.73996e-11	3.62005e-07	2.87199e-10	4.71572e-09	6.3534e-09	7.47992e-14	3.60195e-07	1.63635e-09	0.0176388	2.07663e-07	0.000797343	0.00454297		87.8833	87.8833		0.412528	0.000778645	0.0896856	4.68472
136	2022-03-09 13:27:22	5322117	1.21346e-08	4.30818e-11	3.61199e-07	3.00327e-10	3.38649e-09	7.86322e-09	8.61636e-14	3.59393e-07	1.17511e-09	0.0218792	2.39748e-07	0.000835651	0.00326971		88.45	88.45		0.423725	0.000778772	0.0901483	4.68694
137	2022-03-09 13:27:51	5351884	1.2865e-08	3.31713e-11	3.56451e-07	2.92765e-10	2.58972e-09	8.33652e-09	6.63426e-14	3.54669e-07	8.98633e-10	0.0235051	1.87055e-07	0.00082546	0.00253372		88.9333	88.9333		0.434693	0.000778875	0.0905497	4.68834
138	2022-03-09 13:28:21	5381650	1.28435e-08	3.1134e-11	4.05184e-07	2.28633e-10	2.04082e-09	8.32259e-09	6.2268e-14	4.03158e-07	7.08165e-10	0.0206435	1.54451e-07	0.000567105	0.00175654		89.4333	89.4333		0.44573	0.000778961	0.0908978	4.68941
139	2022-03-09 13:28:54	5414007	5.15593e-09	3.49323e-11	4.26147e-07	8.37844e-11	1.49192e-09	3.34104e-09	6.98646e-14	4.24016e-07	5.17696e-10	0.00787952	1.64769e-07	0.000197597	0.00122093		89.9833	89.9833		0.453574	0.000779049	0.0911081	4.69023
140	2022-03-09 13:29:25	5445874	1.66558e-09	1.39135e-11	4.73537e-07	3.61479e-11	1.22941e-09	1.0793e-09	2.7827e-14	4.71169e-07	4.26605e-10	0.00229068	5.90594e-08	7.67196e-05	0.000905418		90.5	90.5		0.456201	0.000779106	0.091179	4.69078
141	2022-03-09 13:30:05	5485281	4.53971e-10	3.41644e-11	2.90518e-07	1.84115e-11	2.21059e-09	2.94173e-10	6.83288e-14	2.89065e-07	7.67075e-10	0.00101767	2.36378e-07	6.36932e-05	0.00265364		91.1667	91.1667		0.457304	0.000779205	0.0912258	4.69196
142	2022-03-09 13:30:43	5523779	1.40298e-10	3.72768e-11	4.79371e-08	1.84975e-11	2.47179e-09	9.09131e-11	7.45536e-14	4.76974e-08	8.57711e-10	0.00190604	1.56305e-06	0.000387809	0.0179823		91.8	91.8		0.45823	0.000779775	0.0913688	4.6985
143	2022-03-09 13:31:23	5563297	6.71121e-11	4.29691e-11	1.2092e-08	1.67345e-11	2.17724e-09	4.34886e-11	8.59382e-14	1.20315e-08	7.55502e-10	0.00361455	7.14274e-06	0.00139089	0.0627935		92.4667	92.4667		0.46007	0.000782677	0.0919617	4.72542
144	2022-03-09 13:32:02	5602294	5.15676e-11	3.88125e-11	6.63828e-09	1.46447e-11	1.92648e-09	3.34158e-11	7.7625e-14	6.60509e-09	6.68489e-10	0.0050591	1.17523e-05	0.00221718	0.101208		93.1167	93.1167		0.462889	0.000788817	0.0931343	4.77873
145	2022-03-09 13:32:44	5644412	4.37094e-11	3.83109e-11	5.76578e-09	1.26656e-11	1.78323e-09	2.83237e-11	7.66218e-14	5.73695e-09	6.18781e-10	0.00493706	1.33558e-05	0.00220772	0.107859		93.8167	93.8167		0.466387	0.000797605	0.094683	4.8519
146	2022-03-09 13:33:25	5685509	3.30454e-11	4.16382e-11	5.46814e-09	1.11456e-11	1.63062e-09	2.14134e-11	8.32764e-14	5.4408e-09	5.65825e-10	0.00393571	1.53059e-05	0.00204852	0.103997		94.5	94.5		0.469419	0.000807398	0.0961372	4.92428
147	2022-03-09 13:34:06	5726607	2.71222e-11	4.35732e-11	5.43929e-09	1.01211e-11	1.53379e-09	1.75752e-11	8.71464e-14	5.41209e-09	5.32225e-10	0.00324739	1.61022e-05	0.00187009	0.09834		95.1833	95.1833		0.471873	0.000818129	0.0974761	4.99341
148	2022-03-09 13:34:47	5767704	1.85974e-11	4.7607e-11	5.33448e-09	8.96443e-12	1.43145e-09	1.20511e-11	9.5214e-14	5.30781e-09	4.96713e-10	0.00227045	1.79385e-05	0.00168891	0.0935816		95.8667	95.8667		0.473758	0.00082976	0.0986921	5.05899
149	2022-03-09 13:35:28	5808802	3.91191e-11	3.58742e-11	5.26284e-09	8.39575e-12	1.37459e-09	2.53492e-11	7.17484e-14	5.23653e-09	4.76983e-10	0.00484084	1.37015e-05	0.00160331	0.0910876		96.55	96.55		0.476188	0.00084057	0.0998169	5.12208
150	2022-03-09 13:36:09	5849899	3.90224e-11	4.70951e-11	5.18734e-09	7.54327e-12	1.33271e-09	2.52865e-11	9.41902e-14	5.1614e-09	4.6245e-10	0.00489916	1.8249e-05	0.00146148	0.0895978		97.2333	97.2333		0.479516	0.000851486	0.100864	5.18382
151	2022-03-09 13:36:50	5890997	3.05837e-11	4.24061e-11	5.18838e-09	7.11757e-12	1.27368e-09	1.98182e-11	8.48122e-14	5.16244e-09	4.41967e-10	0.00383893	1.64287e-05	0.00137872	0.0856121		97.9167	97.9167		0.482501	0.000863335	0.101834	5.24368
152	2022-03-09 13:37:32	5932094	2.82939e-11	2.7479e-11	5.37492e-09	6.93482e-12	1.21909e-09	1.83344e-11	5.4958e-14	5.34805e-09	4.23024e-10	0.00342825	1.02763e-05	0.0012967	0.0790988		98.6167	98.6167		0.485045	0.000872681	0.102771	5.30133
153	2022-03-09 13:38:13	5973192	2.50904e-11	4.15563e-11	5.11585e-09	6.40377e-12	1.19462e-09	1.62586e-11	8.31126e-14	5.09027e-09	4.14533e-10	0.00319405	1.63277e-05	0.00125804	0.0814364		99.3	99.3		0.487308	0.000881771	0.103644	5.35618
154	2022-03-09 13:38:54	6014289	3.25079e-11	3.17994e-11	5.06795e-09	6.2694e-12	1.16931e-09	2.10651e-11	6.35988e-14	5.04261e-09	4.05751e-10	0.00417742	1.26123e-05	0.00124328	0.0804644		99.9833	99.9833		0.489826	0.000891659	0.104498	5.41149
155	2022-03-09 13:39:35	6055387	3.03364e-11	4.03994e-11	5.06194e-09	6.1404e-12	1.15022e-09	1.9658e-11	8.07988e-14	5.03663e-09	3.99126e-10	0.003903	1.60422e-05	0.00121915	0.0792447		100.667	100.667		0.492587	0.000901449	0.10534	5.46606
156	2022-03-09 13:40:16	6096484	1.99949e-11	3.9478e-11	5.02941e-09	5.82542e-12	1.11964e-09	1.29567e-11	7.8956e-14	5.00426e-09	3.88515e-10	0.00258913	1.57777e-05	0.00116409	0.0776368		101.35	101.35		0.494805	0.000912321	0.106154	5.51966
157	2022-03-09 13:40:57	6137582	3.18952e-11	4.20068e-11	5.03734e-09	5.8308e-12	1.114e-09	2.06681e-11	8.40136e-14	5.01215e-09	3.86558e-10	0.00412359	1.6762e-05	0.00116333	0.0771241		102.033	102.033		0.497099	0.000923439	0.106949	5.57254
158	2022-03-09 13:41:38	6178679	2.43487e-11	4.95932e-11	5.11324e-09	5.43305e-12	1.09719e-09	1.5778e-11	9.91864e-14	5.08767e-09	3.80725e-10	0.00310121	1.94954e-05	0.00106788	0.0748328		102.717	102.717		0.499567	0.000935827	0.107711	5.62446
159	2022-03-09 13:42:19	6219777	7.20248e-12	2.9547e-11	4.99214e-09	5.32555e-12	1.08496e-09	4.66721e-12	5.9094e-14	4.96718e-09	3.76481e-10	0.000939609	1.18969e-05	0.00107215	0.0757937		103.4	103.4		0.500948	0.000946552	0.108443	5.67592
160	2022-03-09 13:43:00	6260874	2.16074e-11	4.89072e-11	5.01406e-09	4.44835e-12	1.07032e-09	1.40016e-11	9.78144e-14	4.98899e-09	3.71401e-10	0.0028065	1.96061e-05	0.000891633	0.0744441		104.083	104.083		0.502228	0.000957316	0.109114	5.72725
161	2022-03-09 13:43:41	6301972	1.97477e-11	3.74304e-11	5.44902e-09	4.66227e-12	1.05629e-09	1.27965e-11	7.48608e-14	5.42177e-09	3.66533e-10	0.00236021	1.38074e-05	0.000859916	0.0676038		104.767	104.767		0.503993	0.000968732	0.109712	5.77579
162	2022-03-09 13:44:23	6343069	1.17282e-11	3.25877e-11	5.88325e-09	4.66872e-12	1.04692e-09	7.59987e-12	6.51754e-14	5.85383e-09	3.63281e-10	0.00129827	1.11338e-05	0.000797549	0.0620587		105.467	105.467		0.505273	0.000977462	0.110292	5.82117
163	2022-03-09 13:45:04	6384167	3.18414e-11	3.18199e-11	7.28607e-08	4.8934e-12	1.13175e-09	2.06332e-11	6.36398e-14	7.24964e-08	3.92717e-10	0.00028461	8.77834e-07	6.74985e-05	0.00541706		106.15	106.15		0.505814	0.000981566	0.110588	5.84422
164	2022-03-09 13:45:46	6426284	2.33382e-11	3.73587e-11	3.28859e-07	4.08177e-12	9.50107e-10	1.51232e-11	7.47174e-14	3.27215e-07	3.29687e-10	4.62178e-05	2.28344e-07	1.24743e-05	0.00100756		106.85	106.85		0.50593	0.000981953	0.110616	5.84647
165	2022-03-09 13:46:25	6465802	-5.55774e-12	1.92885e-11	3.94345e-07	3.77862e-12	8.52079e-10	-3.60142e-12	3.8577e-14	3.92373e-07	2.95671e-10	-9.17854e-06	9.83171e-08	9.63017e-06	0.000753546		107.5	107.5		0.505942	0.000982059	0.110623	5.84704
166	2022-03-09 13:47:04	6504299	4.52359e-11	3.11032e-11	4.00705e-07	1.25053e-10	4.0027e-09	2.93129e-11	6.22064e-14	3.98701e-07	1.38894e-09	7.35208e-05	1.56022e-07	0.000313651	0.00348365		108.15	108.15		0.505963	0.000982142	0.110728	5.84842
167	2022-03-09 13:47:48	6548128	9.52922e-09	2.66497e-11	3.6532e-07	2.80204e-10	4.79623e-09	6.17493e-09	5.32994e-14	3.63493e-07	1.66429e-09	0.0169877	1.46631e-07	0.000770864	0.0045786		108.883	108.883		0.512219	0.000982253	0.111126	5.85138
168	2022-03-09 13:48:21	6581545	1.21582e-08	3.88637e-11	3.58333e-07	2.9349e-10	3.38649e-09	7.87851e-09	7.77274e-14	3.56541e-07	1.17511e-09	0.0220971	2.18004e-07	0.000823158	0.00329586		109.433	109.433		0.522967	0.000982353	0.111564	5.85354
169	2022-03-09 13:48:51	6611312	1.26258e-08	3.61609e-11	3.55376e-07	2.87922e-10	2.59859e-09	8.18152e-09	7.23218e-14	3.53599e-07	9.01711e-10	0.0231378	2.0453e-07	0.000814261	0.00255009		109.933	109.933		0.534276	0.000982459	0.111973	5.855
170	2022-03-09 13:49:21	6641079	1.26614e-08	3.6683e-11	3.84401e-07	2.30178e-10	2.05966e-09	8.20459e-09	7.3366e-14	3.82479e-07	7.14702e-10	0.0214511	1.91817e-07	0.000601806	0.0018686		110.433	110.433		0.545423	0.000982558	0.112327	5.85611
171	2022-03-09 13:49:53	6673436	5.42645e-09	2.82264e-11	4.23638e-07	8.30997e-11	1.48808e-09	3.51634e-09	5.64528e-14	4.2152e-07	5.16364e-10	0.00834205	1.33927e-07	0.000197143	0.001225		110.967	110.967		0.553368	0.000982644	0.11254	5.85693
172	2022-03-09 13:50:24	6704264	1.76952e-09	1.86537e-11	4.70401e-07	3.58964e-11	1.24117e-09	1.14665e-09	3.73074e-14	4.68049e-07	4.30686e-10	0.00244985	7.97083e-08	7.66937e-05	0.000920173		111.483	111.483		0.556156	0.0009827	0.112611	5.85749
173	2022-03-09 13:51:03	6743671	4.97089e-10	1.70259e-11	2.94012e-07	1.77525e-11	2.31449e-09	3.22114e-10	3.40518e-14	2.92542e-07	8.03128e-10	0.00110109	1.164e-07	6.06836e-05	0.00274534		112.133	112.133		0.55731	0.000982763	0.112656	5.85868
174	2022-03-09 13:51:42	6782169	1.26409e-10	4.96239e-11	4.62988e-08	1.72311e-11	2.48282e-09	8.1913e-11	9.92478e-14	4.60673e-08	8.61539e-10	0.00177812	2.15441e-06	0.000374042	0.0187017		112.783	112.783		0.558246	0.000983501	0.112797	5.86565
175	2022-03-09 13:52:21	6821687	6.96921e-11	3.01716e-11	1.17527e-08	1.56262e-11	2.21623e-09	4.51605e-11	6.03432e-14	1.16939e-08	7.69032e-10	0.00386187	5.16021e-06	0.00133627	0.0657633		113.433	113.433		0.560079	0.000985879	0.113353	5.8931
176	2022-03-09 13:53:00	6860684	5.98881e-11	3.22909e-11	6.65403e-09	1.38664e-11	1.9506e-09	3.88075e-11	6.45818e-14	6.62076e-09	6.76858e-10	0.00586149	9.75444e-06	0.00209438	0.102233		114.083	114.083		0.563239	0.000990726	0.114468	5.9477
177	2022-03-09 13:53:42	6902802	5.60934e-11	3.83825e-11	5.75669e-09	1.23238e-11	1.76319e-09	3.63485e-11	7.6765e-14	5.72791e-09	6.11827e-10	0.00634587	1.34019e-05	0.00215154	0.106815		114.783	114.783		0.567511	0.000998831	0.115954	6.02087
178	2022-03-09 13:54:23	6943899	3.88719e-11	3.7072e-11	5.46887e-09	1.08521e-11	1.62629e-09	2.5189e-11	7.4144e-14	5.44153e-09	5.64323e-10	0.00462903	1.36256e-05	0.00199431	0.103707		115.467	115.467		0.571261	0.00100807	0.11737	6.09279
179	2022-03-09 13:55:04	6984997	2.83154e-11	4.45766e-11	5.33812e-09	9.96095e-12	1.52024e-09	1.83484e-11	8.91532e-14	5.31143e-09	5.27523e-10	0.00345451	1.67852e-05	0.00187538	0.0993185		116.15	116.15		0.574023	0.00101846	0.118693	6.16216
180	2022-03-09 13:55:46	7026094	2.69609e-11	4.10547e-11	5.23834e-09	8.80318e-12	1.42317e-09	1.74707e-11	8.21094e-14	5.21215e-09	4.9384e-10	0.00335191	1.57535e-05	0.00168897	0.0947479		116.85	116.85		0.576405	0.00102984	0.11994	6.23008
181	2022-03-09 13:56:27	7067192	2.79822e-11	2.41823e-11	5.19188e-09	8.42693e-12	1.36883e-09	1.81325e-11	4.83646e-14	5.16592e-09	4.74984e-10	0.00351002	9.36224e-06	0.00163125	0.0919457		117.533	117.533		0.57875	0.00103843	0.121075	6.29387
182	2022-03-09 13:57:08	7108289	3.18844e-11	4.70849e-11	5.13193e-09	7.63142e-12	1.30511e-09	2.06611e-11	9.41698e-14	5.10627e-09	4.52873e-10	0.00404622	1.8442e-05	0.00149452	0.0886896		118.217	118.217		0.581331	0.00104792	0.122143	6.35559
183	2022-03-09 13:57:49	7149387	2.69932e-11	4.11058e-11	5.12753e-09	7.3143e-12	1.25413e-09	1.74916e-11	8.22116e-14	5.10189e-09	4.35183e-10	0.00342845	1.61139e-05	0.00143364	0.0852984		118.9	118.9		0.583885	0.00105973	0.123143	6.41503
184	2022-03-09 13:58:30	7190484	2.41122e-11	3.74406e-11	5.1268e-09	6.78755e-12	1.21681e-09	1.56247e-11	7.48812e-14	5.10117e-09	4.22233e-10	0.00306297	1.46792e-05	0.00133059	0.0827719		119.583	119.583		0.586103	0.00107025	0.124087	6.47246
185	2022-03-09 13:59:11	7231582	3.49911e-11	2.3824e-11	5.11893e-09	6.15652e-12	1.18982e-09	2.26742e-11	4.7648e-14	5.09334e-09	4.12868e-10	0.00445175	9.35497e-06	0.00120874	0.0810603		120.267	120.267		0.588671	0.00107846	0.124955	6.52843
186	2022-03-09 13:59:52	7272679	9.41698e-12	3.79013e-11	5.11615e-09	6.05117e-12	1.15035e-09	6.1022e-12	7.58026e-14	5.09057e-09	3.99171e-10	0.00119873	1.48908e-05	0.0011887	0.0784139		120.95	120.95		0.590601	0.00108675	0.125774	6.58292
187	2022-03-09 14:00:33	7313777	2.81219e-11	3.83006e-11	5.06792e-09	5.86627e-12	1.13979e-09	1.8223e-11	7.66012e-14	5.04258e-09	3.95507e-10	0.00361382	1.51909e-05	0.00116335	0.0784335		121.633	121.633		0.592246	0.00109703	0.126578	6.63651
188	2022-03-09 14:01:14	7354874	1.07929e-11	2.98132e-11	5.09044e-09	5.43735e-12	1.11784e-09	6.9938e-12	5.96264e-14	5.06499e-09	3.8789e-10	0.00138081	1.17723e-05	0.00107352	0.0765827		122.317	122.317		0.593952	0.00110624	0.127342	6.68947
189	2022-03-09 14:01:55	7395972	2.33919e-11	3.14718e-11	5.07527e-09	5.38037e-12	1.07979e-09	1.5158e-11	6.29436e-14	5.04989e-09	3.74687e-10	0.00300164	1.24643e-05	0.00106544	0.074197		123	123		0.595449	0.00111452	0.128073	6.74099
190	2022-03-09 14:02:37	7437069	2.57784e-11	2.78169e-11	5.03308e-09	5.23202e-12	1.07512e-09	1.67044e-11	5.56338e-14	5.00791e-09	3.73067e-10	0.0033356	1.11092e-05	0.00104475	0.0744954		123.7	123.7		0.597667	0.00112277	0.128811	6.79303
191	2022-03-09 14:03:18	7478167	1.49209e-11	5.44768e-11	5.0529e-09	5.17612e-12	1.063e-09	9.66874e-12	1.08954e-13	5.02764e-09	3.68861e-10	0.00192312	2.16709e-05	0.00102953	0.0733667		124.383	124.383		0.599464	0.00113397	0.12952	6.84355
192	2022-03-09 14:03:59	7519264	2.96807e-11	4.26109e-11	5.03481e-09	4.02695e-12	1.04633e-09	1.92331e-11	8.52218e-14	5.00964e-09	3.63077e-10	0.00383922	1.70116e-05	0.000803841	0.0724756		125.067	125.067		0.601433	0.00114719	0.130147	6.89338
193	2022-03-09 14:04:40	7560362	1.67162e-11	4.42285e-11	5.43859e-09	4.6354e-12	1.03636e-09	1.08321e-11	8.8457e-14	5.4114e-09	3.59617e-10	0.00200172	1.63464e-05	0.000856599	0.0664555		125.75	125.75		0.603429	0.00115858	0.130714	6.94085
194	2022-03-09 14:05:21	7601459	5.31049e-12	4.50885e-11	5.85881e-09	4.51177e-12	1.05053e-09	3.4412e-12	9.0177e-14	5.82952e-09	3.64534e-10	0.000590306	1.5469e-05	0.000773953	0.0625324		126.433	126.433		0.604314	0.00116945	0.131271	6.98492
195	2022-03-09 14:06:02	7642557	1.09757e-11	4.21706e-11	6.19545e-08	4.816e-12	1.14279e-09	7.11225e-12	8.43412e-14	6.16447e-08	3.96548e-10	0.000115375	1.36818e-06	7.81251e-05	0.0064328		127.117	127.117		0.604555	0.00117521	0.131562	7.00848
196	2022-03-09 14:06:44	7684675	1.38782e-11	1.74559e-11	3.24201e-07	4.13337e-12	9.36543e-10	8.99307e-12	3.49118e-14	3.2258e-07	3.2498e-10	2.78786e-05	1.08227e-07	1.28135e-05	0.00100744		127.817	127.817		0.604605	0.00117572	0.131594	7.01109
197	2022-03-09 14:07:24	7724194	7.00898e-12	3.9867e-11	3.9533e-07	3.70875e-12	8.354e-10	4.54182e-12	7.9734e-14	3.93353e-07	2.89884e-10	1.15464e-05	2.02703e-07	9.42855e-06	0.000736955		128.483	128.483		0.604619	0.00117583	0.131601	7.01167
198	2022-03-09 14:08:02	7762692	2.01562e-11	2.50218e-11	4.00884e-07	1.14734e-10	3.91464e-09	1.30612e-11	5.00436e-14	3.9888e-07	1.35838e-09	3.27448e-05	1.2546e-07	0.000287641	0.00340549		129.117	129.117		0.604633	0.00117593	0.131695	7.01298
199	2022-03-09 14:08:46	7806520	9.30324e-09	3.20349e-11	3.61916e-07	2.81554e-10	5.00764e-09	6.0285e-09	6.40698e-14	3.60106e-07	1.73765e-09	0.0167409	1.77919e-07	0.000781863	0.00482538		129.85	129.85		0.610783	0.00117604	0.132088	7.016
200	2022-03-09 14:09:19	7839938	1.19855e-08	4.39315e-11	3.59408e-07	2.92796e-10	3.48764e-09	7.7666e-09	8.7863e-14	3.57611e-07	1.21021e-09	0.021718	2.45694e-07	0.000818756	0.00338416		130.4	130.4		0.621359	0.00117616	0.132528	7.01826
201	2022-03-09 14:09:49	7869704	1.26111e-08	3.76556e-11	3.53495e-07	2.83605e-10	2.60196e-09	8.17199e-09	7.53112e-14	3.51728e-07	9.0288e-10	0.0232339	2.14118e-07	0.00080632	0.00256699		130.9	130.9		0.632597	0.00117627	0.132934	7.01975
202	2022-03-09 14:10:19	7899470	1.28576e-08	2.92604e-11	3.6738e-07	2.33914e-10	2.07081e-09	8.33172e-09	5.85208e-14	3.65543e-07	7.18571e-10	0.0227927	1.60093e-07	0.000639908	0.00196576		131.4	131.4		0.644104	0.00117637	0.133296	7.02088
203	2022-03-09 14:10:51	7931828	5.51775e-09	2.53699e-11	4.19787e-07	8.41413e-11	1.49324e-09	3.5755e-09	5.07398e-14	4.17688e-07	5.18154e-10	0.00856022	1.21478e-07	0.000201445	0.00124053		131.933	131.933		0.652465	0.00117644	0.13352	7.02173
204	2022-03-09 14:11:23	7963694	1.74165e-09	4.28258e-11	4.68341e-07	3.53535e-11	1.21382e-09	1.12859e-09	8.56516e-14	4.65999e-07	4.21196e-10	0.00242187	1.83802e-07	7.5866e-05	0.000903854		132.467	132.467		0.655393	0.00117652	0.133594	7.02231
205	2022-03-09 14:12:03	8003101	4.91628e-10	2.22678e-11	2.8353e-07	1.80008e-11	2.20867e-09	3.18575e-10	4.45356e-14	2.82112e-07	7.66408e-10	0.00112925	1.57865e-07	6.38072e-05	0.00271668		133.133	133.133		0.656577	0.00117664	0.13364	7.02351
206	2022-03-09 14:12:41	8041599	1.32063e-10	2.71207e-11	4.92108e-08	1.64227e-11	2.36896e-09	8.55768e-11	5.42414e-14	4.89647e-08	8.22029e-10	0.00174772	1.10776e-06	0.000335398	0.0167882		133.767	133.767		0.657488	0.00117704	0.133767	7.02969
207	2022-03-09 14:13:21	8081117	6.57039e-11	3.56694e-11	1.23642e-08	1.58508e-11	2.14196e-09	4.25761e-11	7.13388e-14	1.23024e-08	7.4326e-10	0.0034608	5.79878e-06	0.00128843	0.060416		134.433	134.433		0.659224	0.00117934	0.134308	7.05542
208	2022-03-09 14:14:00	8120114	3.61521e-11	2.2708e-11	6.70077e-09	1.44791e-11	1.89685e-09	2.34266e-11	4.5416e-14	6.66727e-09	6.58207e-10	0.00351367	6.81179e-06	0.00217167	0.0987222		135.083	135.083		0.661491	0.00118344	0.135433	7.10714
209	2022-03-09 14:14:42	8162232	3.74206e-11	5.20196e-11	5.79436e-09	1.26301e-11	1.7212e-09	2.42485e-11	1.04039e-13	5.76539e-09	5.97256e-10	0.00420588	1.80455e-05	0.00219068	0.103593		135.783	135.783		0.664193	0.00119214	0.136959	7.17795
210	2022-03-09 14:15:23	8203329	3.78936e-11	3.46763e-11	5.50819e-09	1.1023e-11	1.58875e-09	2.45551e-11	6.93526e-14	5.48065e-09	5.51296e-10	0.00448032	1.26541e-05	0.00201126	0.10059		136.467	136.467		0.66716	0.00120263	0.138395	7.24772
211	2022-03-09 14:16:04	8244427	3.01429e-11	4.16382e-11	5.35478e-09	1.00716e-11	1.46709e-09	1.95326e-11	8.32764e-14	5.32801e-09	5.0908e-10	0.00366602	1.56299e-05	0.00189031	0.095548		137.15	137.15		0.669944	0.00121229	0.139728	7.31473
212	2022-03-09 14:16:45	8285524	3.08417e-11	2.42028e-11	5.2965e-09	9.18588e-12	1.38982e-09	1.99854e-11	4.84056e-14	5.27002e-09	4.82268e-10	0.00379229	9.18509e-06	0.00174305	0.0915116		137.833	137.833		0.672492	0.00122077	0.14097	7.37864
213	2022-03-09 14:17:26	8326622	3.02397e-11	3.2301e-11	5.23643e-09	8.16355e-12	1.32239e-09	1.95953e-11	6.4602e-14	5.21025e-09	4.58869e-10	0.00376092	1.2399e-05	0.00156683	0.0880705		138.517	138.517		0.675073	0.00122814	0.1421	7.44
214	2022-03-09 14:18:07	8367719	2.00917e-11	2.83083e-11	5.15557e-09	7.87438e-12	1.26133e-09	1.30194e-11	5.66166e-14	5.12979e-09	4.37682e-10	0.002538	1.10368e-05	0.00153503	0.0853215		139.2	139.2		0.677225	0.00123615	0.14316	7.49924
215	2022-03-09 14:18:48	8408817	3.73024e-11	3.19223e-11	5.27464e-09	7.1638e-12	1.22294e-09	2.4172e-11	6.38446e-14	5.24827e-09	4.2436e-10	0.0046057	1.21649e-05	0.00136498	0.0808572		139.883	139.883		0.679665	0.00124408	0.144151	7.55602
216	2022-03-09 14:19:29	8449914	2.10162e-11	2.41004e-11	5.11766e-09	6.69832e-12	1.19678e-09	1.36185e-11	4.82008e-14	5.09207e-09	4.15283e-10	0.00267445	9.46585e-06	0.00131544	0.0815548		140.567	140.567		0.682153	0.00125147	0.145067	7.61151
217	2022-03-09 14:20:11	8491012	2.11129e-11	3.97749e-11	5.11094e-09	6.29412e-12	1.18154e-09	1.36812e-11	7.95498e-14	5.08539e-09	4.09994e-10	0.00269029	1.56428e-05	0.00123769	0.0806221		141.267	141.267		0.684031	0.00126026	0.14596	7.66827
218	2022-03-09 14:20:52	8532109	2.20159e-11	3.59766e-11	5.1047e-09	6.11675e-12	1.13259e-09	1.42663e-11	7.19532e-14	5.07918e-09	3.93009e-10	0.00280878	1.41663e-05	0.00120428	0.0773765		141.95	141.95		0.685909	0.00127044	0.146795	7.72225
219	2022-03-09 14:21:33	8573207	1.35342e-11	3.28949e-11	5.11092e-09	5.68352e-12	1.10619e-09	8.77016e-12	6.57898e-14	5.08537e-09	3.83848e-10	0.00172459	1.29371e-05	0.00111762	0.0754809		142.633	142.633		0.687458	0.0012797	0.147588	7.77448
220	2022-03-09 14:22:14	8614304	1.21259e-11	2.92194e-11	5.05124e-09	5.461e-12	1.11147e-09	7.85758e-12	5.84388e-14	5.02598e-09	3.8568e-10	0.00156339	1.16273e-05	0.00108655	0.0767372		143.317	143.317		0.688582	0.0012881	0.148341	7.82649
221	2022-03-09 14:22:55	8655402	1.77589e-11	3.85156e-11	5.05471e-09	5.5083e-12	1.07476e-09	1.15078e-11	7.70312e-14	5.02944e-09	3.72942e-10	0.00228808	1.53161e-05	0.00109521	0.0741518		144	144		0.689898	0.0012973	0.149087	7.87804
222	2022-03-09 14:23:36	8696499	2.88959e-11	6.17253e-11	5.04619e-09	5.35027e-12	1.07932e-09	1.87245e-11	1.23451e-13	5.02096e-09	3.74524e-10	0.00372928	2.45871e-05	0.00106559	0.0745921		144.683	144.683		0.691954	0.00131094	0.149825	7.92886
223	2022-03-09 14:24:17	8737597	2.30909e-11	3.9867e-11	5.02332e-09	5.25352e-12	1.0546e-09	1.49629e-11	7.9734e-14	4.9982e-09	3.65946e-10	0.00299366	1.59525e-05	0.00105108	0.0732155		145.367	145.367		0.694251	0.00132479	0.150548	7.97936
224	2022-03-09 14:24:58	8778694	1.74579e-11	3.72358e-11	5.02365e-09	4.16777e-12	1.04357e-09	1.13127e-11	7.44716e-14	4.99853e-09	3.62119e-10	0.00226321	1.48987e-05	0.000833799	0.072445		146.05	146.05		0.696047	0.00133533	0.151192	8.02913
225	2022-03-09 14:25:39	8819792	2.72404e-11	3.74509e-11	5.46181e-09	4.6999e-12	1.02281e-09	1.76518e-11	7.49018e-14	5.4345e-09	3.54915e-10	0.0032481	1.37826e-05	0.000864826	0.0653078		146.733	146.733		0.69793	0.00134513	0.151772	8.0762
226	2022-03-09 14:26:19	8859849	-6.36399e-12	4.39725e-11	5.82094e-09	4.29677e-12	1.02186e-09	-4.12387e-12	8.7945e-14	5.79184e-09	3.54585e-10	-0.000712014	1.51843e-05	0.000741867	0.0612216		147.4	147.4		0.698775	0.00135478	0.152308	8.11837
227	2022-03-09 14:27:00	8900947	2.81112e-11	3.18404e-11	5.04599e-08	4.95897e-12	1.13486e-09	1.82161e-11	6.36808e-14	5.02076e-08	3.93796e-10	0.000362815	1.26835e-06	9.87693e-05	0.00784336		148.083	148.083		0.698656	0.0013604	0.152595	8.14197
228	2022-03-09 14:27:43	8943064	2.24029e-11	2.10904e-11	3.20887e-07	4.25915e-12	9.16271e-10	1.45171e-11	4.21808e-14	3.19283e-07	3.17946e-10	4.54678e-05	1.32111e-07	1.33398e-05	0.000995814		148.8	148.8		0.698802	0.00136091	0.152635	8.14514
229	2022-03-09 14:28:22	8982582	5.18149e-12	2.27797e-11	3.94793e-07	3.5862e-12	8.18371e-10	3.35761e-12	4.55594e-14	3.92819e-07	2.83975e-10	8.54746e-06	1.15981e-07	9.12939e-06	0.000722915		149.45	149.45		0.69882	0.00136099	0.152643	8.1457
230	2022-03-09 14:29:01	9021079	2.20159e-11	3.28744e-11	3.8897e-07	1.00123e-10	3.44889e-09	1.42663e-11	6.57488e-14	3.87025e-07	1.19676e-09	3.68614e-05	1.69882e-07	0.000258699	0.00309221		150.1	150.1		0.698834	0.00136108	0.15273	8.14694
231	2022-03-09 14:29:44	9064908	9.06704e-09	2.88918e-11	3.65858e-07	2.75125e-10	4.85034e-09	5.87544e-09	5.77836e-14	3.64029e-07	1.68307e-09	0.0161401	1.58734e-07	0.000755778	0.00462345		150.817	150.817		0.704631	0.0013612	0.153093	8.1497
232	2022-03-09 14:30:18	9098324	1.19922e-08	3.46866e-11	3.56988e-07	2.90666e-10	3.45344e-09	7.77095e-09	6.93732e-14	3.55203e-07	1.19834e-09	0.0218775	1.95306e-07	0.000818309	0.00337369		151.383	151.383		0.715403	0.0013613	0.153539	8.15197
233	2022-03-09 14:30:48	9128092	1.24954e-08	4.33685e-11	3.52778e-07	2.83748e-10	2.58804e-09	8.09702e-09	8.6737e-14	3.51014e-07	8.9805e-10	0.0230675	2.47104e-07	0.000808366	0.00255844		151.883	151.883		0.726639	0.00136141	0.153946	8.15345
234	2022-03-09 14:31:17	9157859	1.27137e-08	2.99361e-11	3.84222e-07	2.46727e-10	2.09313e-09	8.23848e-09	5.98722e-14	3.82301e-07	7.26316e-10	0.0215497	1.5661e-07	0.000645374	0.00189985		152.367	152.367		0.737421	0.00136151	0.154297	8.15453
235	2022-03-09 14:31:50	9190216	6.01303e-09	1.92783e-11	4.20592e-07	9.05419e-11	1.48796e-09	3.89644e-09	3.85566e-14	4.18489e-07	5.16322e-10	0.00931074	9.21329e-08	0.000216354	0.00123378		152.917	152.917		0.745908	0.00136157	0.154534	8.15539
236	2022-03-09 14:32:22	9222082	1.86113e-09	1.7937e-11	4.69774e-07	3.61866e-11	1.20397e-09	1.20601e-09	3.5874e-14	4.67425e-07	4.17778e-10	0.00258012	7.67481e-08	7.74169e-05	0.000893785		153.45	153.45		0.749079	0.00136162	0.154613	8.15596
237	2022-03-09 14:33:01	9261490	5.28049e-10	2.81137e-11	3.20887e-07	1.81395e-11	2.18804e-09	3.42176e-10	5.62274e-14	3.19283e-07	7.5925e-10	0.0010717	1.76105e-07	5.68133e-05	0.00237799		154.1	154.1		0.750266	0.0013617	0.154656	8.15702
238	2022-03-09 14:33:39	9299987	1.30418e-10	4.17304e-11	5.12142e-08	1.78342e-11	2.43087e-09	8.45109e-11	8.34608e-14	5.09581e-08	8.43512e-10	0.00165844	1.63783e-06	0.000349978	0.016553		154.733	154.733		0.75113	0.00136228	0.154785	8.16302
239	2022-03-09 14:34:19	9339504	4.37739e-11	4.36244e-11	1.23523e-08	1.62959e-11	2.1548e-09	2.83655e-11	8.72488e-14	1.22905e-08	7.47716e-10	0.00230791	7.09886e-06	0.00132589	0.0608367		155.4	155.4		0.752452	0.00136519	0.155344	8.18881
240	2022-03-09 14:34:58	9378502	5.07829e-11	2.91069e-11	6.68837e-09	1.44426e-11	1.91964e-09	3.29073e-11	5.82138e-14	6.65493e-09	6.66115e-10	0.0049448	8.74747e-06	0.00217021	0.100094		156.05	156.05		0.75481	0.00137034	0.15648	8.24111
241	2022-03-09 14:35:40	9420619	3.26907e-11	4.07168e-11	5.72478e-09	1.26463e-11	1.73308e-09	2.11836e-11	8.14336e-14	5.69616e-09	6.01379e-10	0.00371892	1.42962e-05	0.00222015	0.105576		156.75	156.75		0.757842	0.0013784	0.158017	8.3131
242	2022-03-09 14:36:21	9461717	3.27229e-11	4.58256e-11	5.46718e-09	1.06554e-11	1.58551e-09	2.12044e-11	9.16512e-14	5.43984e-09	5.50172e-10	0.00389799	1.68481e-05	0.00195877	0.101137		157.433	157.433		0.760444	0.00138904	0.159444	8.38373
243	2022-03-09 14:37:02	9502814	2.73802e-11	4.05325e-11	5.30383e-09	9.92655e-12	1.49169e-09	1.77424e-11	8.1065e-14	5.27731e-09	5.17616e-10	0.00336201	1.5361e-05	0.00188099	0.0980834		158.117	158.117		0.762925	0.00140005	0.160756	8.45179
244	2022-03-09 14:37:43	9543912	2.03712e-11	3.65294e-11	5.25197e-09	8.70105e-12	1.3909e-09	1.32005e-11	7.30588e-14	5.22571e-09	4.82642e-10	0.00252608	1.39806e-05	0.00166505	0.0923592		158.8	158.8		0.764937	0.00141007	0.161968	8.51686
245	2022-03-09 14:38:25	9585009	4.39781e-11	3.03047e-11	5.19704e-09	8.07325e-12	1.30692e-09	2.84978e-11	6.06094e-14	5.17105e-09	4.53501e-10	0.00551102	1.17209e-05	0.00156124	0.0876999		159.5	159.5		0.76775	0.00141907	0.163097	8.57988
246	2022-03-09 14:39:06	9626107	2.41122e-11	4.1802e-11	5.20316e-09	7.81202e-12	1.25832e-09	1.56247e-11	8.3604e-14	5.17714e-09	4.36637e-10	0.00301802	1.61487e-05	0.00150894	0.0843394		160.183	160.183		0.770664	0.00142859	0.164146	8.63866
247	2022-03-09 14:39:47	9667204	2.75092e-11	3.77785e-11	5.08299e-09	7.2799e-12	1.22425e-09	1.7826e-11	7.5557e-14	5.05758e-09	4.24815e-10	0.00352461	1.49394e-05	0.00143941	0.0839957		160.867	160.867		0.772899	0.00143921	0.165153	8.69618
248	2022-03-09 14:40:28	9708302	3.14007e-11	3.33147e-11	5.04356e-09	6.65102e-12	1.19341e-09	2.03477e-11	6.66294e-14	5.01834e-09	4.14113e-10	0.00405466	1.32772e-05	0.00132534	0.0825199		161.55	161.55		0.775489	0.00144885	0.166098	8.75307
249	2022-03-09 14:41:09	9749399	2.53162e-11	4.34913e-11	5.07365e-09	6.3253e-12	1.15131e-09	1.64049e-11	8.69826e-14	5.04828e-09	3.99505e-10	0.0032496	1.72301e-05	0.00125296	0.0791367		162.233	162.233		0.777984	0.00145928	0.166979	8.8083
250	2022-03-09 14:41:50	9790497	2.68319e-11	3.22397e-11	5.03567e-09	6.07697e-12	1.13463e-09	1.73871e-11	6.44794e-14	5.01049e-09	3.93717e-10	0.00347013	1.28689e-05	0.00121285	0.0785784		162.917	162.917		0.78028	0.00146956	0.167821	8.86219
251	2022-03-09 14:42:31	9831594	9.97598e-12	2.75302e-11	5.02546e-09	5.94045e-12	1.11688e-09	6.46444e-12	5.50604e-14	5.00033e-09	3.87557e-10	0.0012928	1.10113e-05	0.00118801	0.0775063		163.6	163.6		0.781908	0.00147772	0.168642	8.91552
252	2022-03-09 14:43:12	9872692	1.65549e-11	3.19428e-11	4.98327e-09	5.64805e-12	1.09011e-09	1.07276e-11	6.38856e-14	4.95835e-09	3.78268e-10	0.00216354	1.28844e-05	0.0011391	0.0762891		164.283	164.283		0.783088	0.00148588	0.169437	8.96806
253	2022-03-09 14:43:53	9913789	2.15214e-11	5.23472e-11	5.01704e-09	5.69105e-12	1.07908e-09	1.39459e-11	1.04694e-13	4.99195e-09	3.74441e-10	0.00279367	2.09726e-05	0.00114004	0.0750088		164.967	164.967		0.784782	0.00149745	0.170215	9.01976
254	2022-03-09 14:44:34	9954887	2.49399e-11	5.29513e-11	5.02578e-09	4.99875e-12	1.06864e-09	1.61611e-11	1.05903e-13	5.00065e-09	3.70818e-10	0.00323179	2.11778e-05	0.00099962	0.074154		165.65	165.65		0.786841	0.00151185	0.170947	9.07072
255	2022-03-09 14:45:15	9995984	2.69609e-11	3.10316e-11	5.0258e-09	5.02347e-12	1.04501e-09	1.74707e-11	6.20632e-14	5.00067e-09	3.62618e-10	0.00349366	1.2411e-05	0.00100456	0.072514		166.333	166.333		0.789139	0.00152333	0.171631	9.12083
256	2022-03-09 14:45:57	10037082	1.08682e-11	3.69287e-11	4.9762e-09	5.03852e-12	1.04596e-09	7.04259e-12	7.38574e-14	4.95132e-09	3.62948e-10	0.00142237	1.49167e-05	0.00101761	0.0733033		167.033	167.033		0.790859	0.00153289	0.172339	9.17187
257	2022-03-09 14:46:38	10078179	1.61464e-11	2.42642e-11	5.45319e-09	4.84072e-12	1.02653e-09	1.04629e-11	4.85284e-14	5.42592e-09	3.56206e-10	0.00192831	8.9438e-06	0.000892147	0.0656489		167.717	167.717		0.792004	0.00154105	0.172992	9.21934
258	2022-03-09 14:47:19	10119277	3.53674e-12	4.68801e-11	5.83047e-09	4.4419e-12	1.00205e-09	2.29181e-12	9.37602e-14	5.80132e-09	3.47711e-10	0.000395049	1.61619e-05	0.000765671	0.0599366		168.4	168.4		0.792798	0.00154962	0.173558	9.26225
259	2022-03-09 14:48:00	10160374	3.61199e-12	3.11237e-11	5.04196e-08	4.4634e-12	1.13943e-09	2.34057e-12	6.22474e-14	5.01675e-08	3.95382e-10	4.66551e-05	1.24079e-06	8.89699e-05	0.00788124		169.083	169.083		0.792949	0.00155557	0.17385	9.28542
260	2022-03-09 14:48:42	10202492	1.38997e-11	2.30356e-11	3.05837e-07	4.17637e-12	9.07029e-10	9.00701e-12	4.60712e-14	3.04308e-07	3.14739e-10	2.95983e-05	1.51397e-07	1.37242e-05	0.00103428		169.783	169.783		0.792976	0.00155606	0.173886	9.28854
261	2022-03-09 14:49:22	10242009	-6.69723e-12	3.21987e-11	3.89328e-07	3.6679e-12	8.26286e-10	-4.33981e-12	6.43974e-14	3.87381e-07	2.86721e-10	-1.12029e-05	1.66238e-07	9.46845e-06	0.000740152		170.45	170.45		0.792982	0.00155616	0.173894	9.28914
262	2022-03-09 14:50:00	10280507	1.51682e-11	3.20451e-11	4.02676e-07	8.83725e-11	3.1271e-09	9.82899e-12	6.40902e-14	4.00663e-07	1.0851e-09	2.45318e-05	1.59961e-07	0.000220566	0.00270827		171.083	171.083		0.792986	0.00155627	0.173966	9.29023
263	2022-03-09 14:50:44	10324335	8.65625e-09	3.71334e-11	3.64513e-07	2.7445e-10	4.91153e-09	5.60925e-09	7.42668e-14	3.6269e-07	1.7043e-09	0.0154657	2.04766e-07	0.000756706	0.00469905		171.817	171.817		0.798666	0.0015564	0.174325	9.29294
264	2022-03-09 14:51:17	10357753	1.18801e-08	3.32942e-11	3.59855e-07	2.88514e-10	3.4334e-09	7.6983e-09	6.65884e-14	3.58056e-07	1.19139e-09	0.0215003	1.85972e-07	0.00080578	0.00332739		172.367	172.367		0.808831	0.00155651	0.174754	9.29515
265	2022-03-09 14:51:47	10387519	1.26708e-08	2.58307e-11	3.55287e-07	2.7935e-10	2.55864e-09	8.21068e-09	5.16614e-14	3.53511e-07	8.87848e-10	0.0232261	1.46138e-07	0.000790217	0.00251152		172.867	172.867		0.820013	0.00155659	0.175153	9.29661
266	2022-03-09 14:52:17	10417285	1.26842e-08	3.20861e-11	3.98107e-07	2.3573e-10	2.02414e-09	8.21936e-09	6.41722e-14	3.96116e-07	7.02377e-10	0.0207499	1.62003e-07	0.000595103	0.00177316		173.367	173.367		0.831007	0.00155667	0.1755	9.29768
267	2022-03-09 14:52:49	10449642	5.69409e-09	3.13285e-11	4.19428e-07	8.53916e-11	1.46564e-09	3.68977e-09	6.2657e-14	4.17331e-07	5.08577e-10	0.00884136	1.50137e-07	0.000204614	0.00121864		173.9	173.9		0.838898	0.00155675	0.175713	9.29848
268	2022-03-09 14:53:21	10481509	1.7637e-09	2.19299e-11	4.66638e-07	3.61963e-11	1.1945e-09	1.14288e-09	4.38598e-14	4.64305e-07	4.14491e-10	0.00246148	9.44634e-08	7.79581e-05	0.000892714		174.433	174.433		0.841912	0.00155682	0.175788	9.29904
269	2022-03-09 14:54:00	10520916	4.97713e-10	4.06144e-11	3.20438e-07	1.74623e-11	2.13129e-09	3.22518e-10	8.12288e-14	3.18836e-07	7.39558e-10	0.00101155	2.54767e-07	5.47689e-05	0.00231956		175.083	175.083		0.843041	0.00155693	0.175832	9.30009
270	2022-03-09 14:54:39	10559414	1.41577e-10	4.40647e-11	5.12779e-08	1.87641e-11	2.404e-09	9.17419e-11	8.81294e-14	5.10215e-08	8.34188e-10	0.0017981	1.7273e-06	0.000367768	0.0163497		175.733	175.733		0.843954	0.00155757	0.175969	9.30615
271	2022-03-09 14:55:18	10598932	6.69938e-11	3.28642e-11	1.2485e-08	1.7258e-11	2.11845e-09	4.3412e-11	6.57284e-14	1.24226e-08	7.35102e-10	0.0034946	5.29104e-06	0.00138924	0.0591747		176.383	176.383		0.845674	0.00155986	0.17654	9.3307
272	2022-03-09 14:55:57	10637929	4.87941e-11	2.78169e-11	6.66307e-09	1.50414e-11	1.90429e-09	3.16186e-11	5.56338e-14	6.62975e-09	6.60789e-10	0.00476919	8.39153e-06	0.00226877	0.0996701		177.033	177.033		0.84836	0.0015643	0.177729	9.38232
273	2022-03-09 14:56:40	10680047	3.72271e-11	2.70388e-11	5.73063e-09	1.30451e-11	1.69973e-09	2.41232e-11	5.40776e-14	5.70198e-09	5.89806e-10	0.00423067	9.48401e-06	0.00228782	0.103439		177.75	177.75		0.851585	0.00157071	0.179362	9.4551
274	2022-03-09 14:57:21	10721144	3.78291e-11	4.0553e-11	5.48252e-09	1.13638e-11	1.57495e-09	2.45133e-11	8.1106e-14	5.45511e-09	5.46508e-10	0.00449363	1.48679e-05	0.00208315	0.100183		178.433	178.433		0.854565	0.00157903	0.180855	9.52468
275	2022-03-09 14:58:02	10762242	2.66062e-11	2.78988e-11	5.37456e-09	9.81153e-12	1.47692e-09	1.72408e-11	5.57976e-14	5.34769e-09	5.12491e-10	0.00322398	1.0434e-05	0.00183472	0.0958342		179.117	179.117		0.857202	0.00158767	0.182194	9.59165
276	2022-03-09 14:58:43	10803339	2.95624e-11	1.64218e-11	5.30839e-09	9.32993e-12	1.39222e-09	1.91564e-11	3.28436e-14	5.28185e-09	4.831e-10	0.00362684	6.2182e-06	0.00176641	0.0914643		179.8	179.8		0.859543	0.00159336	0.183424	9.65564
277	2022-03-09 14:59:24	10844437	2.52517e-11	2.68442e-11	5.38417e-09	8.03455e-12	1.32611e-09	1.63631e-11	5.36884e-14	5.35725e-09	4.6016e-10	0.00305439	1.00216e-05	0.00149975	0.0858949		180.483	180.483		0.861826	0.00159891	0.18454	9.71624
278	2022-03-09 15:00:05	10885534	2.59504e-11	3.87409e-11	5.51681e-09	7.43362e-12	1.26469e-09	1.68159e-11	7.74818e-14	5.48923e-09	4.38847e-10	0.00306343	1.41153e-05	0.00135422	0.0799471		181.167	181.167		0.863916	0.00160716	0.185515	9.7729
279	2022-03-09 15:00:46	10926632	2.68212e-11	3.72972e-11	5.13973e-09	7.15197e-12	1.21538e-09	1.73801e-11	7.45944e-14	5.11403e-09	4.21737e-10	0.00339852	1.45862e-05	0.0013985	0.0824666		181.85	181.85		0.866124	0.00161696	0.186456	9.82839
280	2022-03-09 15:01:27	10967729	3.44644e-11	3.18609e-11	5.07857e-09	6.63597e-12	1.18634e-09	2.23329e-11	6.37218e-14	5.05318e-09	4.1166e-10	0.00441958	1.26102e-05	0.00131323	0.0814656		182.533	182.533		0.868795	0.00162626	0.187382	9.8844
281	2022-03-09 15:02:08	11008827	2.72619e-11	4.10956e-11	5.07479e-09	6.5962e-12	1.14926e-09	1.76657e-11	8.21912e-14	5.04942e-09	3.98793e-10	0.00349857	1.62774e-05	0.00130633	0.0789781		183.217	183.217		0.8715	0.00163613	0.188277	9.93922
282	2022-03-09 15:02:49	11049924	2.56279e-11	3.48094e-11	5.13522e-09	6.20705e-12	1.12011e-09	1.66069e-11	6.96188e-14	5.10954e-09	3.88678e-10	0.00325017	1.36252e-05	0.0012148	0.0760691		183.9	183.9		0.873806	0.00164634	0.189138	9.9922
283	2022-03-09 15:03:31	11091022	1.74794e-11	4.08294e-11	4.98673e-09	5.98345e-12	1.10679e-09	1.13267e-11	8.16588e-14	4.9618e-09	3.84056e-10	0.00228277	1.64575e-05	0.0012059	0.0774026		184.6	184.6		0.875743	0.00165687	0.189986	10.0459
284	2022-03-09 15:04:12	11132119	2.90034e-11	3.35604e-11	4.99548e-09	5.7104e-12	1.06708e-09	1.87942e-11	6.71208e-14	4.9705e-09	3.70277e-10	0.00378115	1.35038e-05	0.00114886	0.0744948		185.283	185.283		0.877815	0.00166711	0.19079	10.0978
285	2022-03-09 15:04:52	11172177	9.47073e-12	2.1674e-11	4.94378e-09	5.35027e-12	1.06661e-09	6.13703e-12	4.3348e-14	4.91906e-09	3.70114e-10	0.0012476	8.81225e-06	0.00108766	0.0752407		185.95	185.95		0.879491	0.00167455	0.191536	10.1477
286	2022-03-09 15:05:33	11213274	2.16719e-11	4.0901e-11	4.95773e-09	5.4868e-12	1.04105e-09	1.40434e-11	8.1802e-14	4.93294e-09	3.61244e-10	0.00284686	1.65828e-05	0.00111228	0.073231		186.633	186.633		0.88089	0.00168322	0.192287	10.1984
287	2022-03-09 15:06:14	11254372	1.82534e-11	3.06528e-11	4.91889e-09	5.6287e-12	1.02269e-09	1.18282e-11	6.13056e-14	4.8943e-09	3.54873e-10	0.00241673	1.25259e-05	0.00115005	0.0725076		187.317	187.317		0.882688	0.00169317	0.19306	10.2482
288	2022-03-09 15:06:55	11295469	7.34223e-12	3.96725e-11	4.91627e-09	5.30942e-12	1.00734e-09	4.75777e-12	7.9345e-14	4.89169e-09	3.49547e-10	0.000972622	1.62204e-05	0.0010854	0.0714573		188	188		0.883846	0.00170299	0.193824	10.2974
289	2022-03-09 15:07:36	11336567	1.59314e-11	3.50142e-11	5.39251e-09	4.9493e-12	9.88379e-10	1.03235e-11	7.00284e-14	5.36555e-09	3.42968e-10	0.00192404	1.30515e-05	0.000922422	0.0639203		188.683	188.683		0.884836	0.00171299	0.19451	10.3437
290	2022-03-09 15:08:17	11377664	1.11799e-11	2.71309e-11	5.75139e-09	4.68485e-12	9.91143e-10	7.24458e-12	5.42618e-14	5.72263e-09	3.43927e-10	0.00126595	9.48196e-06	0.000818653	0.0600994		189.367	189.367		0.885926	0.00172069	0.195105	10.3861
291	2022-03-09 15:08:58	11418762	2.28007e-11	4.17713e-11	3.20158e-08	4.49027e-12	1.09167e-09	1.47749e-11	8.35426e-14	3.18557e-08	3.78809e-10	0.000463805	2.62253e-06	0.000140956	0.0118914		190.05	190.05		0.886517	0.00172483	0.195433	10.4107
292	2022-03-09 15:09:39	11459839	1.20507e-11	2.5114e-11	3.0718e-07	4.1882e-12	9.17471e-10	7.80885e-12	5.0228e-14	3.05644e-07	3.18362e-10	2.55488e-05	1.64335e-07	1.37029e-05	0.00104161		190.733	190.733		0.886684	0.00172578	0.195486	10.4151
293	2022-03-09 15:10:19	11499357	2.71974e-12	1.41388e-11	3.89238e-07	3.96352e-12	8.13807e-10	1.76239e-12	2.82776e-14	3.87292e-07	2.82391e-10	4.55055e-06	7.30137e-08	1.02339e-05	0.000729143		191.4	191.4		0.886694	0.00172586	0.195494	10.4157
294	2022-03-09 15:10:57	11537854	6.08449e-12	3.2209e-11	4.04826e-07	6.77723e-11	2.47046e-09	3.94275e-12	6.4418e-14	4.02802e-07	8.5725e-10	9.78831e-06	1.59925e-07	0.000168252	0.00212822		192.033	192.033		0.886699	0.00172593	0.19555	10.4166
295	2022-03-09 15:11:41	11581683	8.27449e-09	3.02126e-11	3.63528e-07	2.66185e-10	4.75832e-09	5.36187e-09	6.04252e-14	3.6171e-07	1.65114e-09	0.0148237	1.67054e-07	0.000735906	0.0045648		192.767	192.767		0.892137	0.00172605	0.195882	10.419
296	2022-03-09 15:12:15	11615100	1.17201e-08	3.19734e-11	3.60751e-07	2.8906e-10	3.46424e-09	7.59462e-09	6.39468e-14	3.58947e-07	1.20209e-09	0.0211581	1.78151e-07	0.000805299	0.00334894		193.333	193.333		0.902332	0.00172615	0.196318	10.4213
297	2022-03-09 15:12:44	11644867	1.25929e-08	2.94242e-11	3.52868e-07	2.80626e-10	2.59824e-09	8.1602e-09	5.88484e-14	3.51104e-07	9.01589e-10	0.0232416	1.6761e-07	0.000799268	0.00256787		193.817	193.817		0.913062	0.00172623	0.196706	10.4227
298	2022-03-09 15:13:14	11674634	1.27319e-08	3.51063e-11	3.48388e-07	2.00274e-10	1.78563e-09	8.25027e-09	7.02126e-14	3.46646e-07	6.19614e-10	0.0238003	2.02548e-07	0.000577748	0.00178745		194.317	194.317		0.924823	0.00172633	0.19705	10.4238
299	2022-03-09 15:13:46	11706990	1.74955e-09	3.62018e-11	6.16444e-08	3.57512e-11	1.22281e-09	1.13371e-09	7.24036e-14	6.13362e-08	4.24315e-10	0.0184835	1.18044e-06	0.000582873	0.00691786		194.85	194.85		0.936098	0.00172669	0.19736	10.4261
300	2022-03-09 15:14:27	11747420	7.36674e-10	4.6532e-11	5.02998e-08	2.78779e-11	1.18658e-09	4.77365e-10	9.3064e-14	5.00483e-08	4.11743e-10	0.00953808	1.85948e-06	0.00055702	0.00822692		195.533	195.533		0.945672	0.00172773	0.197749	10.4313
301	2022-03-09 15:15:06	11786417	6.28347e-10	5.3453e-11	5.22376e-08	2.56548e-11	1.18634e-09	4.07169e-10	1.06906e-13	5.19764e-08	4.1166e-10	0.00783372	2.05682e-06	0.000493585	0.00792013		196.183	196.183		0.951318	0.00172901	0.198091	10.4365
302	2022-03-09 15:15:45	11825414	5.73952e-10	3.45534e-11	5.59116e-08	2.34264e-11	1.18994e-09	3.71921e-10	6.91068e-14	5.5632e-08	4.12909e-10	0.00668537	1.24221e-06	0.000421095	0.00742215		196.833	196.833		0.956037	0.00173008	0.198388	10.4415
303	2022-03-09 15:16:24	11864412	4.77589e-10	4.25494e-11	6.20481e-08	2.37016e-11	1.18262e-09	3.09478e-10	8.50988e-14	6.17379e-08	4.10369e-10	0.00501277	1.37839e-06	0.000383907	0.00664696		197.483	197.483		0.959839	0.00173093	0.19865	10.4461
304	2022-03-09 15:17:03	11903409	4.83254e-10	3.77375e-11	6.86565e-08	2.09743e-11	1.16126e-09	3.13149e-10	7.5475e-14	6.83132e-08	4.02957e-10	0.00458401	1.10484e-06	0.000307031	0.00589867		198.133	198.133		0.962958	0.00173174	0.198874	10.4502
305	2022-03-09 15:17:42	11942407	3.98136e-10	2.59126e-11	7.12908e-08	1.83986e-11	1.15646e-09	2.57992e-10	5.18252e-14	7.09343e-08	4.01292e-10	0.00363706	7.30608e-07	0.000259375	0.00565723		198.783	198.783		0.96563	0.00173233	0.199058	10.4539
306	2022-03-09 15:18:21	11981404	2.96559e-10	2.77451e-11	6.73972e-08	1.56014e-11	1.13847e-09	1.9217e-10	5.54902e-14	6.70602e-08	3.95049e-10	0.00286564	8.27468e-07	0.000232648	0.00589096		199.433	199.433		0.967743	0.00173284	0.199218	10.4577

## Sheet:  Data processing thro intergrat
					Et (ć) integral		CO (ć) integral		EtO (ć) integral		CO2 (ć) integral
Cycle	Start Index	Start Time, min	End Index	End Time, min	Start	End	Start	End	Start	End	Start	End		Conversion %	Selectivity %
1	7	4.2	10	5.66667	0.0225803	0.0558146	2.16279e-05	2.20811e-05	0.00316942	0.00453073	0.121743	0.130734		14.9831	23.2422
2	39	25.0833	42	26.5833	0.114444	0.14869	0.000212109	0.000212445	0.0272872	0.0285328	1.26187	1.26684		9.8243	33.386
3	71	46	74	47.4833	0.210115	0.243989	0.000381564	0.000381841	0.0465869	0.0477834	2.30471	2.30937		9.42917	33.9267
4	103	66.9167	106	68.4667	0.309935	0.344998	0.000589162	0.000589435	0.0687161	0.0699309	3.51354	3.51822		9.20745	34.1634
5	135	87.8833	138	89.4333	0.412528	0.44573	0.000778645	0.000778961	0.0896856	0.0908978	4.68472	4.68941		9.67598	34.0834
6	167	108.883	170	110.433	0.512219	0.545423	0.000982253	0.000982558	0.111126	0.112327	5.85138	5.85611		9.70223	33.6835
7	199	129.85	202	131.4	0.610783	0.644104	0.00117604	0.00117637	0.132088	0.133296	7.016	7.02088		9.86645	33.1189
8	231	150.817	234	152.367	0.704631	0.737421	0.0013612	0.00136151	0.153093	0.154297	8.1497	8.15453		9.93552	33.2841
9	263	171.817	266	173.367	0.798666	0.831007	0.0015564	0.00155667	0.174325	0.1755	9.29294	9.29768		9.8765	33.1528
10	295	192.767	298	194.317	0.892137	0.924823	0.00172605	0.00172633	0.195882	0.19705	10.419	10.4238		9.7954	32.9275
Ethylene in 5.4vol%		54000
Reduction time		1.5	minutes
Cycles		10
Carbon balance		7.89712e-06
					1.46667
					1.5
					1.48333
					1.55
					1.55
					1.55
					1.55
					1.55
					1.55
					1.55
