# Supplementary material for: Mechano-synthesis of a AgSrFeO3 catalyst for epoxidation of ethylene in a chemical looping set-up
Source: Royal Society of Chemistry journal article supplement (doi:10.1039/d4ma00485j), 2024-01-01
Supplement: d4ma00485j3.xlsx [file d4ma00485j3.xlsx]

## Sheet: Data
Index	Time	ms	Ethylene mbar	Carbon monoxide mbar	Argon mbar	Ethylene oxide mbar	Carbon dioxide mbar	Corrected Et	Corrected CO	Corrected Ar	Corrected CO2	Et (ć)	CO (ć)	EtO (ć)	CO2 (ć)
1	00:00:14	14689	6.10384e-11	6.9455e-11	6.54697e-09	1.25216e-11	1.54076e-09	3.95529e-11	1.3891e-13	6.51424e-09	5.34644e-10	0.00607176	2.13241e-05	0.00192219	0.0820731
2	2000-01-07	67312	4.55369e-11	6.01999e-11	6.61548e-09	8.7419e-12	1.45029e-09	2.95079e-11	1.204e-13	6.5824e-09	5.03251e-10	0.00448285	1.82912e-05	0.00132807	0.0764539
3	00:01:48	108409	3.19167e-11	5.98109e-11	5.8587e-09	8.0195e-12	1.29576e-09	2.0682e-11	1.19622e-13	5.82941e-09	4.49629e-10	0.00354788	2.05204e-05	0.0013757	0.0771311
4	2000-02-29	149506	2.94657e-11	6.08961e-11	6.19398e-09	7.04017e-12	1.26876e-09	1.90938e-11	1.21792e-13	6.16301e-09	4.4026e-10	0.00309812	1.97618e-05	0.00114233	0.0714358
5	2000-03-10	190604	2.76812e-11	4.36039e-11	1.53366e-07	8.1829e-12	1.61826e-09	1.79374e-11	8.72078e-14	1.52599e-07	5.61536e-10	0.000117546	5.71483e-07	5.36235e-05	0.00367981
6	00:03:53	233242	3.21424e-11	3.24751e-11	4.05184e-07	6.53277e-12	1.15191e-09	2.08283e-11	6.49502e-14	4.03158e-07	3.99713e-10	5.16628e-05	1.61104e-07	1.6204e-05	0.000991454
7	00:04:31	271739	1.48027e-11	3.53213e-11	4.54276e-07	5.62655e-12	1.01297e-09	9.59215e-12	7.06426e-14	4.52005e-07	3.51501e-10	2.12214e-05	1.56287e-07	1.2448e-05	0.000777648
8	2000-05-10	310236	6.92879e-10	3.3591e-11	4.49708e-07	2.63683e-10	1.37508e-08	4.48986e-10	6.7182e-14	4.47459e-07	4.77153e-09	0.00100341	1.50141e-07	0.000589289	0.0106636
9	00:05:55	355646	1.2171e-08	3.90787e-11	4.42809e-07	4.64672e-10	1.5093e-08	7.88681e-09	7.81574e-14	4.40595e-07	5.23727e-09	0.0179004	1.77391e-07	0.00105465	0.0118868
10	2000-06-25	385373	1.33084e-08	4.19147e-11	4.01422e-07	4.63626e-10	1.05719e-08	8.62384e-09	8.38294e-14	3.99415e-07	3.66845e-09	0.0215912	2.09881e-07	0.00116076	0.00918456
11	00:06:55	415102	1.40723e-08	5.0832e-11	3.94703e-07	4.34001e-10	7.2025e-09	9.11885e-09	1.01664e-13	3.92729e-07	2.49927e-09	0.0232192	2.58865e-07	0.00110509	0.00636384
12	2000-07-24	444830	1.28737e-08	4.95318e-11	4.19876e-07	2.61936e-10	4.29688e-09	8.34216e-09	9.90636e-14	4.17777e-07	1.49102e-09	0.019968	2.37121e-07	0.000626976	0.00356893
13	00:07:57	477216	4.06132e-09	3.77887e-11	3.58063e-07	1.19703e-10	2.75061e-09	2.63174e-09	7.55774e-14	3.56273e-07	9.54462e-10	0.00738686	2.12134e-07	0.000335987	0.00267902
14	2000-08-29	509084	1.49258e-09	3.14002e-11	3.81445e-07	6.66446e-11	2.15636e-09	9.67192e-10	6.28004e-14	3.79538e-07	7.48257e-10	0.00254834	1.65465e-07	0.000175594	0.0019715
15	2000-09-08	548492	5.15225e-10	3.59561e-11	3.92374e-07	3.51568e-11	2.01971e-09	3.33866e-10	7.19122e-14	3.90412e-07	7.00839e-10	0.000855162	1.84196e-07	9.00505e-05	0.00179513
16	00:09:46	586989	1.87006e-10	2.49092e-11	1.0311e-07	2.66911e-11	2.72446e-09	1.2118e-10	4.98184e-14	1.02594e-07	9.45388e-10	0.00118115	4.85586e-07	0.000260161	0.0092148
17	2000-10-25	625486	7.79911e-11	3.49528e-11	2.37104e-08	2.2246e-11	2.4941e-09	5.05382e-11	6.99056e-14	2.35918e-08	8.65453e-10	0.00214219	2.96313e-06	0.000942953	0.0366844
18	2000-11-05	665004	4.18711e-11	3.50653e-11	9.25667e-09	1.91393e-11	2.22306e-09	2.71325e-11	7.01306e-14	9.21039e-09	7.71402e-10	0.00294586	7.61429e-06	0.00207801	0.0837535
19	00:11:44	704001	3.57974e-11	3.36115e-11	6.28325e-09	1.67452e-11	1.99883e-09	2.31967e-11	6.7223e-14	6.25183e-09	6.93594e-10	0.00371039	1.07525e-05	0.00267845	0.110942
20	2000-12-26	746119	4.22904e-11	2.84516e-11	5.64543e-09	1.54714e-11	1.77819e-09	2.74042e-11	5.69032e-14	5.6172e-09	6.17032e-10	0.00487862	1.01302e-05	0.00275429	0.109847
21	00:13:07	787216	1.84254e-11	4.90813e-11	5.41917e-09	1.41771e-11	1.68305e-09	1.19397e-11	9.81626e-14	5.39207e-09	5.84018e-10	0.0022143	1.8205e-05	0.00262925	0.108311
22	00:13:48	828314	3.57221e-11	5.17125e-11	5.30354e-09	1.32053e-11	1.56571e-09	2.31479e-11	1.03425e-13	5.27702e-09	5.43301e-10	0.00438655	1.95991e-05	0.00250242	0.102956
23	00:14:29	869411	2.21342e-11	4.94396e-11	5.25134e-09	1.21421e-11	1.47921e-09	1.4343e-11	9.88792e-14	5.22508e-09	5.13286e-10	0.00274502	1.89239e-05	0.00232381	0.098235
24	00:15:10	910509	2.86057e-11	4.01947e-11	5.23208e-09	1.17873e-11	1.42534e-09	1.85365e-11	8.03894e-14	5.20592e-09	4.94593e-10	0.00356066	1.54419e-05	0.00226421	0.0950059
25	00:15:51	951606	2.56494e-11	2.96085e-11	5.17914e-09	1.11853e-11	1.36522e-09	1.66208e-11	5.9217e-14	5.15324e-09	4.73731e-10	0.00322531	1.14912e-05	0.00217054	0.0919288
26	00:16:32	992704	2.90787e-11	3.38266e-11	5.18661e-09	1.05102e-11	1.32467e-09	1.8843e-11	6.76532e-14	5.16068e-09	4.5966e-10	0.00365126	1.31094e-05	0.00203659	0.0890698
27	00:17:13	1033801	2.30049e-11	4.0512e-11	5.15789e-09	1.00018e-11	1.28592e-09	1.49072e-11	8.1024e-14	5.1321e-09	4.46214e-10	0.00290469	1.57877e-05	0.00194887	0.0869457
28	00:17:54	1074899	3.85924e-11	4.03175e-11	5.11283e-09	1.00394e-11	1.25593e-09	2.50079e-11	8.0635e-14	5.08727e-09	4.35808e-10	0.00491578	1.58504e-05	0.00197344	0.0856664
29	00:18:35	1115996	2.29834e-11	4.68391e-11	5.14907e-09	9.42775e-12	1.21501e-09	1.48932e-11	9.36782e-14	5.12332e-09	4.21608e-10	0.00290695	1.82847e-05	0.00184016	0.082292
30	00:19:17	1157094	1.55874e-11	3.69491e-11	5.12801e-09	8.99023e-12	1.19558e-09	1.01006e-11	7.38982e-14	5.10237e-09	4.14866e-10	0.0019796	1.44831e-05	0.00176197	0.0813085
31	00:19:58	1198191	1.68129e-11	4.27337e-11	5.08525e-09	8.8193e-12	1.18958e-09	1.08948e-11	8.54674e-14	5.05982e-09	4.12784e-10	0.00215319	1.68914e-05	0.00174301	0.0815808
32	00:20:39	1239289	2.49829e-11	4.36449e-11	5.05065e-09	8.514e-12	1.16906e-09	1.61889e-11	8.72898e-14	5.0254e-09	4.05664e-10	0.00322142	1.73697e-05	0.00169419	0.0807227
33	00:21:20	1280386	2.37897e-11	2.77451e-11	5.07781e-09	8.3377e-12	1.14051e-09	1.54157e-11	5.54902e-14	5.05242e-09	3.95757e-10	0.00305116	1.09829e-05	0.00165024	0.0783302
34	00:22:01	1321484	1.66947e-11	1.06475e-11	5.0429e-09	8.3635e-12	1.14411e-09	1.08182e-11	2.1295e-14	5.01769e-09	3.97006e-10	0.00215601	4.24399e-06	0.0016668	0.0791214
35	00:22:42	1362581	3.37441e-11	5.05863e-11	4.57081e-09	8.6688e-12	1.11699e-09	2.18662e-11	1.01173e-13	4.54796e-09	3.87596e-10	0.00480791	2.22457e-05	0.00190609	0.0852241
36	00:23:23	1403679	-3.14974e-12	3.33351e-11	4.90583e-09	7.99263e-12	1.10356e-09	-2.04103e-12	6.66702e-14	4.8813e-09	3.82935e-10	-0.000418133	1.36583e-05	0.0016374	0.0784494
37	00:24:04	1444776	8.05173e-12	4.04609e-11	6.51073e-08	8.20225e-12	1.27129e-09	5.21752e-12	8.09218e-14	6.47818e-08	4.41138e-10	8.054e-05	1.24914e-06	0.000126614	0.0068096
38	00:24:46	1486894	2.37359e-11	2.92399e-11	3.22499e-07	7.38202e-12	1.01418e-09	1.53809e-11	5.84798e-14	3.20887e-07	3.5192e-10	4.79324e-05	1.82244e-07	2.30051e-05	0.00109671
39	00:25:26	1526411	4.04199e-12	2.87485e-11	3.88701e-07	6.47365e-12	8.73436e-10	2.61921e-12	5.7497e-14	3.86757e-07	3.03082e-10	6.77223e-06	1.48664e-07	1.67383e-05	0.000783649
40	00:26:04	1564909	1.45447e-11	3.63144e-11	3.98645e-07	1.45397e-10	5.10025e-09	9.42497e-12	7.26288e-14	3.96652e-07	1.76979e-09	2.37613e-05	1.83105e-07	0.000366561	0.00446181
41	00:26:48	1608737	9.29839e-09	2.75404e-11	3.67738e-07	3.43328e-10	6.33578e-09	6.02536e-09	5.50808e-14	3.65899e-07	2.19852e-09	0.0164673	1.50535e-07	0.000938313	0.00600853
42	00:27:22	1642155	1.2208e-08	2.12542e-11	3.68992e-07	3.41386e-10	4.34464e-09	7.91078e-09	4.25084e-14	3.67147e-07	1.50759e-09	0.0215466	1.1578e-07	0.000929835	0.00410623
43	00:27:51	1671921	1.28327e-08	3.45023e-11	3.64872e-07	3.26621e-10	3.25391e-09	8.31559e-09	6.90046e-14	3.63048e-07	1.12911e-09	0.022905	1.9007e-07	0.000899664	0.00311008
44	00:28:21	1701687	1.25828e-08	3.81266e-11	3.87447e-07	2.18915e-10	2.36716e-09	8.15365e-09	7.62532e-14	3.8551e-07	8.21405e-10	0.0211503	1.97798e-07	0.000567859	0.0021307
45	00:28:54	1734045	4.2264e-09	3.89047e-11	3.37549e-07	8.63085e-11	1.73404e-09	2.73871e-09	7.78094e-14	3.35861e-07	6.01712e-10	0.00815428	2.31671e-07	0.000256977	0.00179155
46	00:29:25	1765911	1.55123e-09	1.88278e-11	3.59676e-07	4.44663e-11	1.46636e-09	1.0052e-09	3.76556e-14	3.57878e-07	5.08827e-10	0.00280877	1.05219e-07	0.00012425	0.00142179
47	00:30:05	1805318	5.39864e-10	1.97492e-11	3.8467e-07	2.34113e-11	1.44261e-09	3.49832e-10	3.94984e-14	3.82747e-07	5.00586e-10	0.000914004	1.03197e-07	6.11666e-05	0.00130788
48	00:30:43	1843816	1.94983e-10	1.70156e-11	1.16727e-07	2.00949e-11	2.44803e-09	1.26349e-10	3.40312e-14	1.16143e-07	8.49466e-10	0.00108787	2.9301e-07	0.000173018	0.00731395
49	00:31:22	1882314	7.08531e-11	3.86487e-11	2.62344e-08	1.83545e-11	2.30741e-09	4.59128e-11	7.72974e-14	2.61032e-08	8.00671e-10	0.00175889	2.96122e-06	0.000703151	0.0306733
50	00:32:01	1921831	3.30777e-11	2.62504e-11	9.76733e-09	1.64926e-11	2.05774e-09	2.14343e-11	5.25008e-14	9.71849e-09	7.14036e-10	0.00220552	5.40215e-06	0.00169703	0.0734719
51	00:32:40	1960829	3.42171e-11	3.1523e-11	6.45796e-09	1.44802e-11	1.83901e-09	2.21727e-11	6.3046e-14	6.42567e-09	6.38136e-10	0.00345064	9.81158e-06	0.00225349	0.0993105
52	00:33:22	2002946	3.26154e-11	3.0489e-11	5.75896e-09	1.28032e-11	1.6912e-09	2.11348e-11	6.0978e-14	5.73017e-09	5.86846e-10	0.00368834	1.06416e-05	0.00223435	0.102414
53	00:34:04	2044044	2.95947e-11	4.84977e-11	5.54218e-09	1.17336e-11	1.57339e-09	1.91774e-11	9.69954e-14	5.51447e-09	5.45966e-10	0.00347764	1.75893e-05	0.00212778	0.0990061
54	00:34:45	2085141	1.36632e-11	5.14361e-11	5.41088e-09	1.11692e-11	1.47956e-09	8.85375e-12	1.02872e-13	5.38383e-09	5.13407e-10	0.00164451	1.91076e-05	0.00207458	0.0953611
55	00:35:26	2126239	1.86082e-11	4.15051e-11	5.31862e-09	1.0564e-11	1.41406e-09	1.20581e-11	8.30102e-14	5.29203e-09	4.90679e-10	0.00227854	1.56859e-05	0.00199621	0.0927204
56	00:36:07	2167336	2.08657e-11	3.7287e-11	5.26624e-09	9.80615e-12	1.34327e-09	1.3521e-11	7.4574e-14	5.23991e-09	4.66115e-10	0.00258038	1.42319e-05	0.00187144	0.0889547
57	00:36:48	2208434	2.90142e-11	3.44613e-11	5.23881e-09	9.17513e-12	1.30859e-09	1.88012e-11	6.89226e-14	5.21262e-09	4.54081e-10	0.00360686	1.32223e-05	0.00176018	0.0871119
58	00:37:29	2249531	2.69932e-11	4.10751e-11	5.22151e-09	9.05688e-12	1.25809e-09	1.74916e-11	8.21502e-14	5.1954e-09	4.36557e-10	0.00336674	1.58121e-05	0.00174325	0.0840276
59	00:38:10	2290629	2.42842e-11	2.67009e-11	5.22637e-09	8.50218e-12	1.21909e-09	1.57362e-11	5.34018e-14	5.20024e-09	4.23024e-10	0.00302605	1.02691e-05	0.00163496	0.0813471
60	00:38:51	2331726	1.54047e-11	4.34196e-11	5.16666e-09	8.29148e-12	1.18394e-09	9.98225e-12	8.68392e-14	5.14083e-09	4.10827e-10	0.00194176	1.68921e-05	0.00161287	0.0799146
61	00:39:32	2372824	2.36392e-11	3.65806e-11	5.19831e-09	8.0109e-12	1.15527e-09	1.53182e-11	7.31612e-14	5.17232e-09	4.00879e-10	0.00296157	1.41448e-05	0.0015488	0.0775046
62	00:40:13	2413921	1.98122e-11	3.93756e-11	5.17968e-09	7.79912e-12	1.13655e-09	1.28383e-11	7.87512e-14	5.15378e-09	3.94383e-10	0.00249105	1.52803e-05	0.00151328	0.076523
63	00:40:55	2455019	2.31984e-11	4.21399e-11	5.13938e-09	7.59918e-12	1.12179e-09	1.50326e-11	8.42798e-14	5.11368e-09	3.89261e-10	0.00293967	1.64812e-05	0.00148605	0.0761215
64	00:41:36	2496116	1.26419e-11	3.1308e-11	5.14421e-09	7.39385e-12	1.09911e-09	8.19195e-12	6.2616e-14	5.11849e-09	3.81391e-10	0.00160046	1.22333e-05	0.00144454	0.0745125
65	00:42:17	2537214	2.40262e-11	4.71463e-11	5.12563e-09	7.24012e-12	1.06624e-09	1.5569e-11	9.42926e-14	5.1e-09	3.69985e-10	0.00305274	1.84887e-05	0.00141963	0.0725461
66	00:42:58	2578311	2.15752e-11	5.06375e-11	5.14233e-09	7.0004e-12	1.08111e-09	1.39807e-11	1.01275e-13	5.11662e-09	3.75145e-10	0.00273242	1.97933e-05	0.00136817	0.073319
67	00:43:39	2619409	2.43164e-11	2.87588e-11	4.77951e-09	7.30892e-12	1.04501e-09	1.5757e-11	5.75176e-14	4.75561e-09	3.62618e-10	0.00331335	1.20947e-05	0.0015369	0.0762506
68	00:44:20	2660506	1.59099e-11	4.39418e-11	5.01234e-09	7.08532e-12	1.03037e-09	1.03096e-11	8.78836e-14	4.98728e-09	3.57538e-10	0.00206718	1.76216e-05	0.00142068	0.0716901
69	00:45:01	2701604	1.52542e-11	2.37728e-11	4.47075e-08	7.08317e-12	1.1801e-09	9.88472e-12	4.75456e-14	4.4484e-08	4.09495e-10	0.000222209	1.06883e-06	0.00015923	0.00920545
70	00:45:43	2743721	2.58107e-11	1.42616e-11	3.21603e-07	6.15007e-12	9.24429e-10	1.67253e-11	2.85232e-14	3.19995e-07	3.20777e-10	5.22675e-05	8.91364e-08	1.92193e-05	0.00100244
71	00:46:23	2783239	1.62109e-11	9.8899e-12	3.94883e-07	5.5513e-12	8.28321e-10	1.05047e-11	1.97798e-14	3.92909e-07	2.87427e-10	2.67356e-05	5.0342e-08	1.41287e-05	0.000731538
72	00:47:01	2821736	7.93348e-12	1.25826e-11	4.09395e-07	9.59545e-11	3.59021e-09	5.1409e-12	2.51652e-14	4.07348e-07	1.2458e-09	1.26204e-05	6.17781e-08	0.000235559	0.00305833
73	00:47:45	2865565	8.6149e-09	4.36142e-11	3.67022e-07	3.11625e-10	5.79576e-09	5.58246e-09	8.72284e-14	3.65187e-07	2.01113e-09	0.0152866	2.3886e-07	0.00085333	0.00550712
74	00:48:18	2898982	1.18384e-08	3.84644e-11	3.67918e-07	3.21287e-10	4.11548e-09	7.67128e-09	7.69288e-14	3.66078e-07	1.42807e-09	0.0209553	2.10143e-07	0.000877645	0.003901
75	00:48:45	2925499	1.25082e-08	3.9007e-11	3.61109e-07	3.03953e-10	2.99596e-09	8.10531e-09	7.8014e-14	3.59303e-07	1.0396e-09	0.0225584	2.17126e-07	0.000845951	0.00289337
76	00:49:15	2955266	1.27663e-08	2.83799e-11	3.64155e-07	2.69073e-10	2.38372e-09	8.27256e-09	5.67598e-14	3.62334e-07	8.27151e-10	0.0228313	1.5665e-07	0.00074261	0.00228284
77	00:49:47	2987623	5.19827e-09	3.05094e-11	3.36295e-07	9.25253e-11	1.60123e-09	3.36848e-09	6.10188e-14	3.34614e-07	5.55627e-10	0.0100668	1.82356e-07	0.000276514	0.0016605
78	00:50:19	3019489	1.8389e-09	1.98004e-11	3.53584e-07	4.56176e-11	1.33764e-09	1.19161e-09	3.96008e-14	3.51816e-07	4.64161e-10	0.00338702	1.12561e-07	0.000129663	0.00131933
79	00:50:58	3058897	6.18349e-10	2.7909e-11	3.85476e-07	2.24718e-11	1.1633e-09	4.0069e-10	5.5818e-14	3.83549e-07	4.03665e-10	0.00104469	1.4553e-07	5.85892e-05	0.00105245
80	00:51:37	3097394	2.20492e-10	1.95751e-11	1.50678e-07	1.88049e-11	2.23819e-09	1.42879e-10	3.91502e-14	1.49925e-07	7.76652e-10	0.000953004	2.61133e-07	0.000125429	0.00518028
81	00:52:15	3135891	9.59866e-11	3.43282e-11	3.26614e-08	1.74418e-11	2.16644e-09	6.21993e-11	6.86564e-14	3.24981e-08	7.51755e-10	0.00191394	2.11263e-06	0.000536702	0.0231323
82	00:52:55	3175409	5.97269e-11	3.29972e-11	1.10406e-08	1.57433e-11	1.9344e-09	3.8703e-11	6.59944e-14	1.09854e-08	6.71237e-10	0.00352313	6.00747e-06	0.00143311	0.0611026
83	00:53:34	3214406	3.22714e-11	3.67853e-11	6.6966e-09	1.34439e-11	1.73128e-09	2.09119e-11	7.35706e-14	6.66312e-09	6.00754e-10	0.00313845	1.10415e-05	0.00201766	0.0901611
84	00:54:16	3256524	3.19704e-11	3.7799e-11	5.80464e-09	1.2198e-11	1.59426e-09	2.07168e-11	7.5598e-14	5.77562e-09	5.53208e-10	0.00358694	1.30892e-05	0.00211198	0.0957834
85	00:54:57	3297621	4.08176e-11	1.9268e-11	5.52487e-09	1.11864e-11	1.47716e-09	2.64498e-11	3.8536e-14	5.49725e-09	5.12575e-10	0.00481146	7.01006e-06	0.00203491	0.0932421
86	00:55:38	3338719	3.39054e-11	3.63861e-11	5.39074e-09	1.06801e-11	1.39331e-09	2.19707e-11	7.27722e-14	5.36379e-09	4.83479e-10	0.00409612	1.35673e-05	0.00199115	0.0901376
87	00:56:19	3379816	1.34804e-11	4.52625e-11	5.32433e-09	9.73628e-12	1.32731e-09	8.7353e-12	9.0525e-14	5.29771e-09	4.60577e-10	0.00164888	1.70876e-05	0.00183783	0.0869388
88	00:57:00	3420914	2.19514e-11	3.62428e-11	5.31017e-09	9.331e-12	1.25029e-09	1.42245e-11	7.24856e-14	5.28362e-09	4.33851e-10	0.00269219	1.37189e-05	0.00176602	0.0821124
89	00:57:42	3462011	1.92962e-11	3.83723e-11	5.28311e-09	8.65375e-12	1.20301e-09	1.25039e-11	7.67446e-14	5.25669e-09	4.17444e-10	0.00237867	1.45994e-05	0.00164623	0.079412
90	00:58:23	3503109	2.67029e-11	3.53418e-11	5.21103e-09	8.19795e-12	1.16091e-09	1.73035e-11	7.06836e-14	5.18497e-09	4.02836e-10	0.00333723	1.36324e-05	0.0015811	0.0776929
91	00:59:04	3544206	8.09473e-12	2.79909e-11	5.18379e-09	7.9593e-12	1.15047e-09	5.24539e-12	5.59818e-14	5.15787e-09	3.99213e-10	0.00101697	1.08537e-05	0.00154314	0.0773988
92	00:59:45	3585304	3.09492e-11	3.63042e-11	5.26332e-09	7.65937e-12	1.13643e-09	2.00551e-11	7.26084e-14	5.237e-09	3.94341e-10	0.0038295	1.38645e-05	0.00146255	0.075299
93	01:00:26	3626401	3.08417e-11	3.48299e-11	5.22906e-09	7.4304e-12	1.10884e-09	1.99854e-11	6.96598e-14	5.20291e-09	3.84767e-10	0.0038412	1.33886e-05	0.00142812	0.0739523
94	2001-01-07	3667499	3.69799e-12	3.22499e-11	5.2064e-09	7.19927e-12	1.09816e-09	2.3963e-12	6.44998e-14	5.18037e-09	3.81062e-10	0.000462573	1.24508e-05	0.00138972	0.0735588
95	01:01:48	3708596	2.03819e-11	2.97109e-11	5.20212e-09	6.9316e-12	1.09312e-09	1.32075e-11	5.94218e-14	5.17611e-09	3.79313e-10	0.00255162	1.148e-05	0.00133915	0.0732814
96	01:02:29	3749694	2.06507e-11	4.79551e-11	5.2236e-09	6.55105e-12	1.07164e-09	1.33817e-11	9.59102e-14	5.19748e-09	3.71859e-10	0.00257464	1.84532e-05	0.00126043	0.071546
97	2001-03-09	3789751	2.05647e-11	3.8618e-11	5.20567e-09	6.71552e-12	1.06348e-09	1.33259e-11	7.7236e-14	5.17964e-09	3.69028e-10	0.00257275	1.49115e-05	0.00129652	0.0712458
98	01:03:50	3830849	1.99949e-11	5.61968e-11	5.23877e-09	6.52417e-12	1.05136e-09	1.29567e-11	1.12394e-13	5.21258e-09	3.64822e-10	0.00248566	2.1562e-05	0.00125162	0.0699888
99	01:04:31	3871946	7.86898e-12	3.95291e-11	5.00987e-09	6.66392e-12	1.03241e-09	5.0991e-12	7.90582e-14	4.98482e-09	3.58246e-10	0.00102293	1.58598e-05	0.00133684	0.0718674
100	2001-05-13	3913044	1.98014e-11	2.9885e-11	5.00987e-09	6.31455e-12	1.01921e-09	1.28313e-11	5.977e-14	4.98482e-09	3.53666e-10	0.00257408	1.19904e-05	0.00126676	0.0709486
101	01:05:54	3954141	2.29727e-11	5.14566e-11	8.00417e-09	6.44892e-12	1.13704e-09	1.48863e-11	1.02913e-13	7.96415e-09	3.94553e-10	0.00186917	1.29221e-05	0.000809744	0.0495411
102	01:06:35	3995239	2.65954e-11	2.2749e-11	2.93116e-07	5.96625e-12	9.40143e-10	1.72338e-11	4.5498e-14	2.9165e-07	3.2623e-10	5.90907e-05	1.56002e-07	2.04569e-05	0.00111856
103	2001-07-17	4037877	7.99798e-12	2.67726e-11	3.79563e-07	4.95252e-12	8.21129e-10	5.18269e-12	5.35452e-14	3.77665e-07	2.84932e-10	1.3723e-05	1.4178e-07	1.31135e-05	0.000754456
104	01:07:56	4076374	1.50392e-11	1.82032e-11	4.02228e-07	3.3813e-11	1.81946e-09	9.7454e-12	3.64064e-14	4.00217e-07	6.31353e-10	2.43503e-05	9.09667e-08	8.44867e-05	0.00157753
105	01:08:40	4120202	7.39894e-09	2.84721e-11	3.69351e-07	2.83512e-10	5.47326e-09	4.79451e-09	5.69442e-14	3.67504e-07	1.89922e-09	0.0130461	1.54948e-07	0.000771452	0.00516789
106	2001-09-13	4153620	1.14541e-08	2.35885e-11	3.69799e-07	3.08914e-10	3.891e-09	7.42226e-09	4.7177e-14	3.6795e-07	1.35018e-09	0.0201719	1.28216e-07	0.000839554	0.00366946
107	01:09:43	4183386	1.23705e-08	2.8595e-11	3.63887e-07	2.97225e-10	2.85979e-09	8.01608e-09	5.719e-14	3.62068e-07	9.92347e-10	0.0221397	1.57954e-07	0.00082091	0.00274078
108	2001-10-13	4213152	1.27972e-08	2.2319e-11	3.63259e-07	2.54651e-10	2.22906e-09	8.29259e-09	4.4638e-14	3.61443e-07	7.73484e-10	0.022943	1.235e-07	0.00070454	0.00213999
109	01:10:45	4245509	5.76562e-09	2.9414e-11	3.37818e-07	9.70424e-11	1.54279e-09	3.73612e-09	5.8828e-14	3.36129e-07	5.35348e-10	0.0111151	1.75016e-07	0.000288706	0.00159269
110	2001-11-17	4277376	2.00906e-09	1.69645e-11	3.53226e-07	4.73505e-11	1.30247e-09	1.30187e-09	3.3929e-14	3.5146e-07	4.51957e-10	0.00370418	9.65373e-08	0.000134725	0.00128594
111	01:11:56	4316783	6.76345e-10	4.1157e-11	3.89417e-07	2.31888e-11	1.13451e-09	4.38272e-10	8.2314e-14	3.8747e-07	3.93675e-10	0.00113111	2.1244e-07	5.98467e-05	0.00101601
112	01:12:35	4355281	2.53914e-10	1.71385e-11	1.6752e-07	1.83147e-11	2.16692e-09	1.64536e-10	3.4277e-14	1.66682e-07	7.51921e-10	0.000987124	2.05643e-07	0.000109878	0.0045111
113	01:13:13	4393779	8.62256e-11	1.79473e-11	3.60561e-08	1.72623e-11	2.16044e-09	5.58742e-11	3.58946e-14	3.58758e-08	7.49673e-10	0.00155743	1.00052e-06	0.000481168	0.0208963
114	01:13:53	4433296	4.07101e-11	3.31509e-11	1.1863e-08	1.51349e-11	1.9512e-09	2.63801e-11	6.63018e-14	1.18037e-08	6.77066e-10	0.00223491	5.61704e-06	0.00128222	0.0573606
115	01:14:32	4472294	3.19382e-11	2.51651e-11	7.02047e-09	1.35256e-11	1.73488e-09	2.0696e-11	5.03302e-14	6.98537e-09	6.02003e-10	0.00296276	7.20509e-06	0.00193628	0.0861806
116	01:15:14	4514411	2.91754e-11	2.54211e-11	6.00791e-09	1.17949e-11	1.58694e-09	1.89057e-11	5.08422e-14	5.97787e-09	5.50668e-10	0.00316261	8.50507e-06	0.00197309	0.0921178
117	01:15:55	4555509	3.69691e-11	3.7502e-11	5.76328e-09	1.05532e-11	1.48712e-09	2.3956e-11	7.5004e-14	5.73446e-09	5.16031e-10	0.00417754	1.30795e-05	0.00184031	0.0899876
118	01:16:36	4596606	2.26394e-11	3.73382e-11	5.62167e-09	9.81475e-12	1.39342e-09	1.46703e-11	7.46764e-14	5.59356e-09	4.83517e-10	0.00262272	1.33504e-05	0.00175465	0.0864417
119	01:17:17	4637704	1.22657e-11	3.63451e-11	5.54402e-09	9.32778e-12	1.31724e-09	7.94817e-12	7.26902e-14	5.5163e-09	4.57082e-10	0.00144085	1.31773e-05	0.00169095	0.0828603
120	01:17:58	4678801	3.36581e-11	3.93449e-11	5.47387e-09	8.91713e-12	1.25401e-09	2.18104e-11	7.86898e-14	5.4465e-09	4.35141e-10	0.00400449	1.44478e-05	0.00163722	0.0798938
121	01:18:39	4719899	2.55419e-11	4.00513e-11	5.39714e-09	8.16462e-12	1.20457e-09	1.65512e-11	8.01026e-14	5.37015e-09	4.17986e-10	0.00308206	1.49163e-05	0.00152037	0.077835
122	01:19:20	4760996	3.09922e-11	2.9844e-11	5.42206e-09	7.8733e-12	1.17614e-09	2.00829e-11	5.9688e-14	5.39495e-09	4.08121e-10	0.00372255	1.10637e-05	0.00145938	0.0756486
123	01:20:02	4802094	3.01537e-11	3.04377e-11	5.41661e-09	7.56155e-12	1.12947e-09	1.95396e-11	6.08754e-14	5.38953e-09	3.91926e-10	0.00362548	1.12951e-05	0.00140301	0.0727199
124	01:20:43	4843191	2.32629e-11	2.45304e-11	5.39104e-09	7.40352e-12	1.11364e-09	1.50744e-11	4.90608e-14	5.36408e-09	3.86433e-10	0.00281024	9.14616e-06	0.0013802	0.0720408
125	01:21:24	4884289	8.70748e-12	3.43077e-11	5.40129e-09	6.7553e-12	1.08712e-09	5.64245e-12	6.86154e-14	5.37428e-09	3.77231e-10	0.0010499	1.27674e-05	0.00125697	0.0701918
126	01:22:05	4925386	1.86404e-11	3.52599e-11	5.36215e-09	6.68972e-12	1.06228e-09	1.2079e-11	7.05198e-14	5.33534e-09	3.68611e-10	0.00226396	1.32175e-05	0.00125385	0.0690886
127	01:22:46	4966484	1.97799e-11	3.90172e-11	5.38979e-09	6.27585e-12	1.07176e-09	1.28174e-11	7.80344e-14	5.36284e-09	3.71901e-10	0.00239003	1.45509e-05	0.00117025	0.0693477
128	01:23:27	5007581	2.09947e-11	4.40339e-11	5.33002e-09	6.22317e-12	1.05209e-09	1.36046e-11	8.80678e-14	5.30337e-09	3.65075e-10	0.00256527	1.6606e-05	0.00117344	0.0688383
129	01:24:08	5048679	2.01239e-11	3.9519e-11	5.28573e-09	6.02322e-12	1.02845e-09	1.30403e-11	7.9038e-14	5.2593e-09	3.56872e-10	0.00247947	1.50282e-05	0.00114525	0.0678554
130	01:24:49	5089776	2.33167e-11	3.9949e-11	5.23407e-09	6.42527e-12	1.00145e-09	1.51092e-11	7.9898e-14	5.2079e-09	3.47503e-10	0.00290121	1.53417e-05	0.00123375	0.0667262
131	01:25:30	5130874	4.49349e-12	3.18915e-11	5.03878e-09	6.5274e-12	9.86814e-10	2.91178e-12	6.3783e-14	5.01359e-09	3.42424e-10	0.000580778	1.2722e-05	0.00130194	0.0682993
132	01:26:11	5171971	2.48002e-11	4.65423e-11	4.96071e-09	6.25435e-12	9.777e-10	1.60705e-11	9.30846e-14	4.93591e-09	3.39262e-10	0.00325584	1.88587e-05	0.00126711	0.0687335
133	01:26:53	5213069	1.86727e-11	3.60072e-11	6.43258e-09	6.16727e-12	1.08531e-09	1.20999e-11	7.20144e-14	6.40042e-09	3.76603e-10	0.00189049	1.12515e-05	0.000963573	0.0588403
134	01:27:34	5254166	1.59852e-11	1.90018e-11	2.85053e-07	6.10385e-12	9.0295e-10	1.03584e-11	3.80036e-14	2.83628e-07	3.13324e-10	3.65211e-05	1.33991e-07	2.15206e-05	0.0011047
135	01:28:16	5296804	1.57594e-11	1.45585e-11	3.76518e-07	5.30512e-12	7.98814e-10	1.02121e-11	2.9117e-14	3.74635e-07	2.77188e-10	2.72587e-05	7.77209e-08	1.41608e-05	0.000739889
136	01:28:55	5335301	9.59973e-12	1.09035e-11	4.02049e-07	2.37005e-11	1.53067e-09	6.22063e-12	2.1807e-14	4.00039e-07	5.31142e-10	1.55501e-05	5.45122e-08	5.92455e-05	0.00132773
137	01:29:39	5379130	7.07836e-09	3.1912e-11	3.68187e-07	2.74193e-10	5.51034e-09	4.58678e-09	6.3824e-14	3.66346e-07	1.91209e-09	0.0125203	1.74218e-07	0.000748454	0.00521935
138	01:30:12	5412547	1.12566e-08	3.91299e-11	3.69083e-07	3.01144e-10	3.92807e-09	7.29428e-09	7.82598e-14	3.67238e-07	1.36304e-09	0.0198626	2.13104e-07	0.000820025	0.0037116
139	01:30:42	5442314	1.22462e-08	1.90632e-11	3.61647e-07	2.89031e-10	2.84635e-09	7.93554e-09	3.81264e-14	3.59839e-07	9.87683e-10	0.022053	1.05954e-07	0.000803224	0.00274479
140	01:31:12	5472081	1.25936e-08	2.69261e-11	3.61199e-07	2.51496e-10	2.17424e-09	8.16065e-09	5.38522e-14	3.59393e-07	7.54461e-10	0.0227068	1.49842e-07	0.00069978	0.00209927
141	01:31:44	5504438	6.03324e-09	3.28744e-11	3.36832e-07	9.79422e-11	1.53596e-09	3.90954e-09	6.57488e-14	3.35148e-07	5.32978e-10	0.0116651	1.96178e-07	0.000292236	0.00159028
142	01:32:16	5536306	2.12508e-09	1.95137e-11	3.51613e-07	4.72054e-11	1.27249e-09	1.37705e-09	3.90274e-14	3.49855e-07	4.41554e-10	0.00393607	1.11553e-07	0.000134928	0.00126211
143	01:32:55	5575713	7.00221e-10	1.83569e-11	3.8897e-07	2.26169e-11	1.11111e-09	4.53743e-10	3.67138e-14	3.87025e-07	3.85555e-10	0.00117239	9.48615e-08	5.84378e-05	0.000996202
144	01:33:34	5614211	2.58762e-10	3.10418e-11	1.76658e-07	1.78632e-11	2.1302e-09	1.67678e-10	6.20836e-14	1.75775e-07	7.39179e-10	0.000953936	3.532e-07	0.000101626	0.00420527
145	01:34:12	5652709	7.77116e-11	2.67623e-11	3.76025e-08	1.72612e-11	2.10477e-09	5.03571e-11	5.35246e-14	3.74145e-08	7.30355e-10	0.00134593	1.43058e-06	0.000461351	0.0195207
146	01:34:52	5692226	6.12104e-11	1.80088e-11	1.20881e-08	1.55799e-11	1.88929e-09	3.96643e-11	3.60176e-14	1.20277e-08	6.55584e-10	0.00329776	2.99456e-06	0.00129534	0.0545063
147	01:35:31	5731224	3.94739e-11	1.68621e-11	6.96278e-09	1.43061e-11	1.70824e-09	2.55791e-11	3.37242e-14	6.92797e-09	5.92759e-10	0.00369215	4.86784e-06	0.00206498	0.0855604
148	01:36:13	5773341	2.69502e-11	4.59177e-11	5.9403e-09	1.21937e-11	1.53691e-09	1.74637e-11	9.18354e-14	5.9106e-09	5.33308e-10	0.00295465	1.55374e-05	0.00206302	0.0902291
149	01:36:54	5814439	2.33704e-11	4.19453e-11	5.64297e-09	1.11391e-11	1.43121e-09	1.5144e-11	8.38906e-14	5.61476e-09	4.9663e-10	0.00269718	1.49411e-05	0.0019839	0.0884509
150	01:37:35	5855536	2.95517e-11	3.62632e-11	5.51488e-09	9.85883e-12	1.33559e-09	1.91495e-11	7.25264e-14	5.48731e-09	4.6345e-10	0.00348978	1.32171e-05	0.00179666	0.0844585
151	01:38:16	5896634	1.87479e-11	3.96315e-11	5.48149e-09	9.2063e-12	1.27992e-09	1.21486e-11	7.9263e-14	5.45408e-09	4.44132e-10	0.00222744	1.45328e-05	0.00168796	0.0814312
152	01:38:57	5937731	2.50474e-11	4.68494e-11	5.43306e-09	8.5699e-12	1.22485e-09	1.62307e-11	9.36988e-14	5.40589e-09	4.25023e-10	0.00300241	1.73327e-05	0.00158529	0.0786221
153	01:39:38	5978829	2.23492e-11	3.43282e-11	5.40738e-09	8.514e-12	1.20086e-09	1.44823e-11	6.86564e-14	5.38034e-09	4.16698e-10	0.0026917	1.27606e-05	0.00158243	0.0774483
154	01:40:19	6019926	1.31687e-11	3.63861e-11	5.3733e-09	7.9808e-12	1.13391e-09	8.53332e-12	7.27722e-14	5.34643e-09	3.93467e-10	0.00159608	1.36114e-05	0.00149273	0.0735943
155	01:41:01	6061024	2.40047e-11	4.40953e-11	5.32309e-09	7.58627e-12	1.09768e-09	1.5555e-11	8.81906e-14	5.29647e-09	3.80895e-10	0.00293687	1.66508e-05	0.00143232	0.0719148
156	01:41:42	6102121	2.45529e-11	3.32225e-11	5.28986e-09	7.29925e-12	1.06084e-09	1.59103e-11	6.6445e-14	5.26341e-09	3.68111e-10	0.00302281	1.26239e-05	0.00138679	0.0699378
157	01:42:23	6143219	1.41147e-11	3.04377e-11	5.28961e-09	7.28957e-12	1.05281e-09	9.14633e-12	6.08754e-14	5.26316e-09	3.65325e-10	0.0017378	1.15663e-05	0.00138502	0.0694117
158	01:43:04	6184316	1.40932e-11	3.47991e-11	5.26313e-09	7.1638e-12	1.02413e-09	9.13239e-12	6.95982e-14	5.23681e-09	3.55373e-10	0.00174388	1.32902e-05	0.00136797	0.0678606
159	01:43:45	6225414	3.01967e-11	3.66728e-11	5.24056e-09	6.7768e-12	1.01909e-09	1.95675e-11	7.33456e-14	5.21436e-09	3.53624e-10	0.00375261	1.40661e-05	0.00129964	0.0678174
160	01:44:26	6266511	2.74662e-11	3.73075e-11	5.22248e-09	6.35432e-12	1.00134e-09	1.77981e-11	7.4615e-14	5.19637e-09	3.47465e-10	0.0034251	1.43591e-05	0.00122284	0.0668669
161	01:45:07	6307609	1.93822e-11	5.44563e-11	5.20864e-09	6.28015e-12	9.92214e-10	1.25597e-11	1.08913e-13	5.1826e-09	3.44298e-10	0.00242343	2.10151e-05	0.00121178	0.0664335
162	01:45:48	6348706	2.19514e-11	4.53444e-11	5.15786e-09	6.31455e-12	9.89693e-10	1.42245e-11	9.06888e-14	5.13207e-09	3.43423e-10	0.00277169	1.7671e-05	0.00123041	0.0669171
163	01:46:29	6389804	1.02339e-11	3.31713e-11	5.05636e-09	6.19845e-12	9.75179e-10	6.63157e-12	6.63426e-14	5.03108e-09	3.38387e-10	0.00131812	1.31866e-05	0.00123203	0.0672594
164	01:47:10	6430901	2.24137e-11	2.52061e-11	4.93021e-09	5.87702e-12	9.63421e-10	1.45241e-11	5.04122e-14	4.90556e-09	3.34307e-10	0.00296074	1.02765e-05	0.00119803	0.0681486
165	01:47:51	6471999	2.11344e-11	4.17713e-11	5.95218e-09	5.848e-12	1.05821e-09	1.36951e-11	8.35426e-14	5.92242e-09	3.67199e-10	0.00231242	1.41062e-05	0.000987434	0.0620015
166	01:48:33	6513096	1.62754e-11	1.7763e-11	2.80126e-07	5.5341e-12	8.93593e-10	1.05465e-11	3.5526e-14	2.78725e-07	3.10077e-10	3.78382e-05	1.27459e-07	1.9855e-05	0.00111248
167	01:49:15	6555734	4.79449e-12	2.08345e-11	3.7392e-07	4.7601e-12	7.78536e-10	3.10683e-12	4.1669e-14	3.7205e-07	2.70152e-10	8.35056e-06	1.11998e-07	1.27942e-05	0.000726117
168	01:49:54	6594231	3.50449e-12	1.92475e-11	4.02676e-07	1.66291e-11	1.25413e-09	2.27091e-12	3.8495e-14	4.00663e-07	4.35183e-10	5.66788e-06	9.60783e-08	4.1504e-05	0.00108616
169	01:50:38	6638060	6.82416e-09	3.13694e-11	3.6532e-07	2.58833e-10	4.81819e-09	4.42206e-09	6.27388e-14	3.63493e-07	1.67191e-09	0.0121654	1.726e-07	0.000712071	0.00459957
170	01:51:11	6671477	1.10987e-08	2.79397e-11	3.64424e-07	2.89503e-10	3.51366e-09	7.19196e-09	5.58794e-14	3.62602e-07	1.21924e-09	0.0198343	1.54107e-07	0.000798405	0.00336248
171	01:51:41	6701244	1.20796e-08	3.99387e-11	3.56988e-07	2.78459e-10	2.58216e-09	7.82758e-09	7.98774e-14	3.55203e-07	8.9601e-10	0.0220369	2.24878e-07	0.000783943	0.00252253
172	01:52:11	6731011	1.24632e-08	2.4295e-11	3.57167e-07	2.49296e-10	1.98179e-09	8.07615e-09	4.859e-14	3.55381e-07	6.87681e-10	0.0227253	1.36726e-07	0.000701489	0.00193505
173	01:52:43	6763368	6.25518e-09	2.29537e-11	3.33428e-07	9.62265e-11	1.4131e-09	4.05336e-09	4.59074e-14	3.31761e-07	4.90346e-10	0.0122177	1.38375e-07	0.000290048	0.00147801
174	01:53:15	6795236	2.16977e-09	1.5439e-11	3.46597e-07	4.72774e-11	1.20902e-09	1.40601e-09	3.0878e-14	3.44864e-07	4.1953e-10	0.004077	8.95367e-08	0.00013709	0.00121651
175	01:53:54	6834643	7.26817e-10	8.18022e-12	3.84938e-07	2.24212e-11	1.04249e-09	4.70977e-10	1.63604e-14	3.83013e-07	3.61744e-10	0.00122966	4.27151e-08	5.8539e-05	0.000944469
176	01:54:33	6873141	2.72082e-10	2.96392e-11	1.87139e-07	1.79406e-11	1.9422e-09	1.76309e-10	5.92784e-14	1.86203e-07	6.73943e-10	0.000946864	3.18353e-07	9.63495e-05	0.0036194
177	01:55:11	6911639	1.11713e-10	3.47787e-11	3.98561e-08	1.7458e-11	2.00819e-09	7.239e-11	6.95574e-14	3.96568e-08	6.96842e-10	0.00182541	1.75398e-06	0.000440227	0.0175718
178	01:55:51	6951156	5.38251e-11	3.64885e-11	1.26457e-08	1.54499e-11	1.81011e-09	3.48787e-11	7.2977e-14	1.25825e-08	6.28108e-10	0.002772	5.79989e-06	0.00122789	0.0499193
179	01:56:30	6990154	4.35589e-11	4.24163e-11	7.07713e-09	1.34525e-11	1.64754e-09	2.82262e-11	8.48326e-14	7.04174e-09	5.71696e-10	0.00400841	1.20471e-05	0.00191039	0.0811868
180	01:57:12	7032271	3.82484e-11	2.2575e-11	5.99362e-09	1.17013e-11	1.53008e-09	2.4785e-11	4.515e-14	5.96365e-09	5.30938e-10	0.004156	7.57086e-06	0.0019621	0.089029
181	01:57:53	7073369	2.50689e-11	1.49578e-11	5.71943e-09	1.08919e-11	1.41778e-09	1.62446e-11	2.99156e-14	5.69083e-09	4.9197e-10	0.00285453	5.25681e-06	0.00191394	0.0864495
182	01:58:34	7114466	2.28114e-11	4.42694e-11	5.58863e-09	9.63093e-12	1.33295e-09	1.47818e-11	8.85388e-14	5.56069e-09	4.62534e-10	0.00265827	1.59223e-05	0.00173197	0.0831792
183	01:59:15	7155564	2.70684e-11	2.80932e-11	5.51778e-09	9.23425e-12	1.27129e-09	1.75403e-11	5.61864e-14	5.49019e-09	4.41138e-10	0.00319485	1.0234e-05	0.00168195	0.0803501
184	01:59:56	7196661	3.15404e-11	3.73485e-11	5.44686e-09	8.45703e-12	1.19906e-09	2.04382e-11	7.4697e-14	5.41963e-09	4.16074e-10	0.00377114	1.37827e-05	0.00156045	0.0767717
185	02:00:34	7234509	2.58537e-11	3.33658e-11	5.35083e-09	8.09368e-12	1.15203e-09	1.67532e-11	6.67316e-14	5.32408e-09	3.99754e-10	0.00314669	1.25339e-05	0.0015202	0.0750843
186	2002-01-15	7275606	2.95409e-11	3.16356e-11	5.36578e-09	7.69377e-12	1.11976e-09	1.91425e-11	6.32712e-14	5.33895e-09	3.88557e-10	0.00358544	1.18509e-05	0.00144106	0.0727777
187	02:01:56	7316704	1.90597e-11	1.94523e-11	5.33651e-09	7.21217e-12	1.08916e-09	1.23507e-11	3.89046e-14	5.30983e-09	3.77939e-10	0.00232601	7.3269e-06	0.00135827	0.0711772
188	02:02:37	7357801	2.81757e-11	3.63758e-11	5.33167e-09	6.84775e-12	1.05821e-09	1.82579e-11	7.27516e-14	5.30501e-09	3.67199e-10	0.00344162	1.37137e-05	0.00129081	0.0692174
189	2002-03-18	7398899	1.93177e-11	2.5288e-11	5.25833e-09	7.01975e-12	1.03769e-09	1.25179e-11	5.0576e-14	5.23204e-09	3.60078e-10	0.00239254	9.6666e-06	0.00134169	0.0688218
190	02:03:59	7439996	1.90489e-11	3.60482e-11	5.20618e-09	6.78862e-12	1.02125e-09	1.23437e-11	7.20964e-14	5.18015e-09	3.54374e-10	0.00238288	1.39178e-05	0.00131051	0.06841
191	02:04:41	7481094	2.01239e-11	4.53956e-11	5.17155e-09	6.6048e-12	1.01081e-09	1.30403e-11	9.07912e-14	5.14569e-09	3.50751e-10	0.00253421	1.76441e-05	0.00128356	0.068164
192	2002-05-22	7522191	1.59099e-11	3.14821e-11	5.16534e-09	6.40162e-12	9.86579e-10	1.03096e-11	6.29642e-14	5.13951e-09	3.42343e-10	0.00200595	1.2251e-05	0.00124557	0.06661
193	2002-06-03	7563289	1.50607e-11	2.49707e-11	5.16238e-09	6.22425e-12	9.56936e-10	9.75933e-12	4.99414e-14	5.13657e-09	3.32057e-10	0.00189997	9.72272e-06	0.00121175	0.0646457
194	02:06:44	7604386	1.97262e-11	1.25518e-11	5.12484e-09	5.92755e-12	9.67979e-10	1.27826e-11	2.51036e-14	5.09922e-09	3.35889e-10	0.00250677	4.92303e-06	0.00116244	0.0658707
195	2002-07-25	7645484	-7.10573e-12	3.4277e-11	5.54909e-09	6.44247e-12	9.54186e-10	-4.60451e-12	6.8554e-14	5.52134e-09	3.31103e-10	-0.000833948	1.24162e-05	0.00116683	0.0599677
196	2002-08-06	7686581	1.67377e-11	3.12261e-11	4.79239e-09	5.9727e-12	9.44107e-10	1.0846e-11	6.24522e-14	4.76843e-09	3.27605e-10	0.00227455	1.3097e-05	0.00125255	0.068703
197	02:08:47	7727679	1.72644e-11	3.59253e-11	5.20665e-09	5.6373e-12	9.97371e-10	1.11873e-11	7.18506e-14	5.18062e-09	3.46088e-10	0.00215946	1.38691e-05	0.00108815	0.0668044
198	2002-09-28	7768776	2.66384e-11	2.48069e-11	2.62748e-07	5.5298e-12	8.71164e-10	1.72617e-11	4.96138e-14	2.61434e-07	3.02294e-10	6.60269e-05	1.89775e-07	2.11518e-05	0.00115629
199	2002-10-11	7811414	8.05173e-12	2.0814e-11	3.76787e-07	4.76117e-12	7.9545e-10	5.21752e-12	4.1628e-14	3.74903e-07	2.76021e-10	1.3917e-05	1.11037e-07	1.26997e-05	0.000736247
200	02:10:49	7849911	9.02998e-13	1.42411e-11	4.07155e-07	5.24815e-12	7.96407e-10	5.85143e-13	2.84822e-14	4.05119e-07	2.76353e-10	1.44437e-06	7.03057e-08	1.29546e-05	0.000682153
201	02:11:33	7893740	5.94591e-09	5.05453e-11	3.64066e-07	2.42395e-10	5.18496e-09	3.85295e-09	1.01091e-13	3.62246e-07	1.79918e-09	0.0106363	2.79066e-07	0.000669145	0.00496674
202	2002-12-05	7925606	1.05017e-08	2.25442e-11	3.6532e-07	2.87236e-10	3.96191e-09	6.8051e-09	4.50884e-14	3.63493e-07	1.37478e-09	0.0187214	1.24042e-07	0.00079021	0.00378214
203	02:12:39	7959023	1.19942e-08	3.85361e-11	3.58063e-07	2.75847e-10	2.79512e-09	7.77224e-09	7.70722e-14	3.56273e-07	9.69907e-10	0.0218154	2.16329e-07	0.000774258	0.00272237
204	02:13:08	7988789	1.23544e-08	3.71232e-11	3.56362e-07	2.53119e-10	2.16452e-09	8.00565e-09	7.42464e-14	3.5458e-07	7.51088e-10	0.0225778	2.09392e-07	0.000713855	0.00211825
205	02:13:41	8021146	6.88294e-09	1.47018e-11	3.33608e-07	1.02753e-10	1.50164e-09	4.46015e-09	2.94036e-14	3.3194e-07	5.21069e-10	0.0134366	8.85811e-08	0.000309553	0.00156977
206	02:14:13	8053014	2.28601e-09	3.50756e-11	3.42566e-07	4.79977e-11	1.26696e-09	1.48133e-09	7.01512e-14	3.40853e-07	4.39635e-10	0.00434596	2.05811e-07	0.000140816	0.00128981
207	02:14:44	8084881	9.40268e-10	3.93347e-11	3.77324e-07	2.65406e-11	1.0822e-09	6.09294e-10	7.86694e-14	3.75437e-07	3.75523e-10	0.00162289	2.09541e-07	7.06925e-05	0.00100023
208	02:15:21	8121038	3.9031e-10	1.78551e-11	2.89263e-07	1.72849e-11	1.74448e-09	2.52921e-10	3.57102e-14	2.87817e-07	6.05335e-10	0.000878757	1.24073e-07	6.00552e-05	0.00210319
209	02:15:59	8159536	1.21259e-10	3.75532e-11	6.12816e-08	1.77482e-11	2.03134e-09	7.85758e-11	7.51064e-14	6.09752e-08	7.04875e-10	0.00128865	1.23175e-06	0.000291072	0.01156
210	02:16:39	8199054	7.41103e-11	1.59509e-11	1.65309e-08	1.61088e-11	1.86349e-09	4.80235e-11	3.19018e-14	1.64482e-08	6.46631e-10	0.00291967	1.93953e-06	0.000979363	0.0393131
211	02:17:18	8238051	4.66226e-11	3.48913e-11	7.96511e-09	1.44071e-11	1.68365e-09	3.02114e-11	6.97826e-14	7.92528e-09	5.84227e-10	0.00381203	8.80506e-06	0.00181787	0.0737168
212	02:17:57	8277049	4.14626e-11	4.0338e-11	6.13085e-09	1.24001e-11	1.53667e-09	2.68678e-11	8.0676e-14	6.1002e-09	5.33224e-10	0.00440441	1.32251e-05	0.00203274	0.087411
213	02:18:39	8319166	3.03042e-11	4.61123e-11	5.68944e-09	1.15369e-11	1.41778e-09	1.96371e-11	9.22246e-14	5.66099e-09	4.9197e-10	0.00346885	1.62912e-05	0.00203796	0.0869052
214	02:19:20	8360264	1.99304e-11	2.89635e-11	5.52014e-09	1.01168e-11	1.32659e-09	1.29149e-11	5.7927e-14	5.49254e-09	4.60327e-10	0.00235135	1.05465e-05	0.00184192	0.0838095
215	02:20:01	8401361	2.61332e-11	2.97109e-11	5.44339e-09	9.2923e-12	1.23865e-09	1.69343e-11	5.94218e-14	5.41617e-09	4.29812e-10	0.00312662	1.09712e-05	0.00171566	0.0793571
216	02:20:42	8442459	4.41071e-11	3.3499e-11	5.40305e-09	8.69353e-12	1.19966e-09	2.85814e-11	6.6998e-14	5.37603e-09	4.16282e-10	0.00531645	1.24623e-05	0.00161709	0.0774329
217	02:21:23	8483556	2.77672e-11	3.50449e-11	5.33236e-09	8.07755e-12	1.14866e-09	1.79931e-11	7.00898e-14	5.3057e-09	3.98585e-10	0.00339129	1.32103e-05	0.00152243	0.075124
218	02:22:04	8524654	3.06912e-11	3.16253e-11	5.29432e-09	7.70775e-12	1.11016e-09	1.98879e-11	6.32506e-14	5.26785e-09	3.85226e-10	0.00377534	1.20069e-05	0.00146317	0.0731277
219	02:22:45	8565751	1.88877e-11	4.15972e-11	5.24018e-09	7.40352e-12	1.07764e-09	1.22392e-11	8.31944e-14	5.21398e-09	3.73941e-10	0.00234739	1.5956e-05	0.00141994	0.0717189
220	02:23:26	8606849	3.56791e-11	3.85668e-11	5.22067e-09	7.2971e-12	1.05376e-09	2.31201e-11	7.71336e-14	5.19457e-09	3.65655e-10	0.00445082	1.48489e-05	0.00140476	0.0703918
221	02:24:07	8647946	2.24997e-11	2.40083e-11	5.24626e-09	6.923e-12	1.04189e-09	1.45798e-11	4.80166e-14	5.22003e-09	3.61536e-10	0.00279305	9.19853e-06	0.00132624	0.0692594
222	02:24:49	8689044	8.10548e-12	3.99387e-11	5.22204e-09	6.58437e-12	1.00098e-09	5.25235e-12	7.98774e-14	5.19593e-09	3.4734e-10	0.00101086	1.53731e-05	0.00126722	0.0668485
223	02:25:30	8730141	2.16397e-11	3.55977e-11	5.19731e-09	6.61877e-12	9.89693e-10	1.40225e-11	7.11954e-14	5.17132e-09	3.43423e-10	0.00271159	1.37673e-05	0.0012799	0.0664092
224	02:26:11	8771239	1.94359e-11	4.51909e-11	5.17307e-09	6.3683e-12	9.885e-10	1.25945e-11	9.03818e-14	5.1472e-09	3.43009e-10	0.00244685	1.75594e-05	0.00123723	0.06664
225	02:26:52	8812336	1.29859e-11	3.00692e-11	5.10236e-09	6.1189e-12	9.627e-10	8.41486e-12	6.01384e-14	5.07685e-09	3.34057e-10	0.0016575	1.18456e-05	0.00120526	0.0658001
226	02:27:33	8853434	1.69097e-11	3.12568e-11	5.08471e-09	6.2694e-12	9.58743e-10	1.09575e-11	6.25136e-14	5.05929e-09	3.32684e-10	0.00216582	1.23562e-05	0.00123919	0.0657571
227	02:28:14	8894531	3.93019e-11	3.35091e-11	5.11666e-09	5.04175e-12	9.27307e-10	2.54676e-11	6.70182e-14	5.09108e-09	3.21776e-10	0.00500241	1.31639e-05	0.000990311	0.0632038
228	02:28:54	8934589	3.76679e-11	4.18328e-11	4.67154e-09	6.30917e-12	9.30186e-10	2.44088e-11	8.36656e-14	4.64818e-09	3.22775e-10	0.00525126	1.79996e-05	0.00135734	0.069441
229	02:29:35	8975686	-1.32439e-11	4.75047e-11	5.13097e-09	5.9125e-12	9.2935e-10	-8.58205e-12	9.50094e-14	5.10532e-09	3.22484e-10	-0.001681	1.86099e-05	0.00115811	0.0631664
230	02:30:16	9016784	1.41039e-11	2.74585e-11	1.67431e-07	6.0544e-12	9.12786e-10	9.13933e-12	5.4917e-14	1.66594e-07	3.16737e-10	5.48599e-05	3.29646e-07	3.63423e-05	0.00190125
231	02:30:59	9059422	1.68774e-12	2.23907e-11	3.57616e-07	5.15355e-12	7.99414e-10	1.09366e-12	4.47814e-14	3.55828e-07	2.77397e-10	3.07355e-06	1.25851e-07	1.44833e-05	0.000779581
232	02:31:37	9097919	4.25699e-12	1.32992e-11	4.03393e-07	4.49887e-12	7.04632e-10	2.75853e-12	2.65984e-14	4.01376e-07	2.44507e-10	6.87268e-06	6.6268e-08	1.12086e-05	0.000609173
233	02:32:16	9136416	1.28001e-09	1.86742e-11	3.99092e-07	1.70233e-10	4.48621e-09	8.29446e-10	3.73484e-14	3.97097e-07	1.55671e-09	0.00208878	9.40537e-08	0.000428694	0.00392024
234	02:33:00	9180245	1.01251e-08	1.92988e-11	3.6747e-07	2.84765e-10	4.03965e-09	6.56106e-09	3.85976e-14	3.65633e-07	1.40176e-09	0.0179444	1.05564e-07	0.000778828	0.00383379
235	02:33:33	9213662	1.19956e-08	2.80932e-11	3.59855e-07	2.75479e-10	2.82536e-09	7.77315e-09	5.61864e-14	3.58056e-07	9.804e-10	0.0217093	1.56921e-07	0.000769375	0.00273812
236	02:34:03	9243429	1.24262e-08	2.27694e-11	3.55913e-07	2.63637e-10	2.16488e-09	8.05218e-09	4.55388e-14	3.54133e-07	7.51213e-10	0.0227377	1.28592e-07	0.000744457	0.00212127
237	02:34:33	9273196	1.02971e-08	3.56796e-11	3.46059e-07	1.28367e-10	1.53811e-09	6.67252e-09	7.13592e-14	3.44329e-07	5.33724e-10	0.0193783	2.07242e-07	0.000372804	0.00155004
238	02:35:05	9305552	2.95591e-09	3.10316e-11	3.35758e-07	5.66525e-11	1.27032e-09	1.91543e-09	6.20632e-14	3.34079e-07	4.40801e-10	0.00573346	1.85774e-07	0.000169578	0.00131945
239	02:35:37	9337419	1.19712e-09	2.16228e-11	3.7168e-07	2.94818e-11	1.0858e-09	7.75734e-10	4.32456e-14	3.69822e-07	3.76773e-10	0.00209759	1.16936e-07	7.9719e-05	0.0010188
240	02:36:16	9376827	4.40125e-10	1.5654e-11	3.29576e-07	1.75633e-11	1.56259e-09	2.85201e-10	3.1308e-14	3.27928e-07	5.42219e-10	0.000869706	9.54721e-08	5.35584e-05	0.00165347
241	02:36:55	9415324	1.68634e-10	2.86973e-11	7.15859e-08	1.79084e-11	2.00483e-09	1.09275e-10	5.73946e-14	7.1228e-08	6.95676e-10	0.00153416	8.05787e-07	0.000251424	0.00976689
242	02:37:34	9454841	6.72196e-11	2.52266e-11	1.83213e-08	1.62475e-11	1.86109e-09	4.35583e-11	5.04532e-14	1.82297e-08	6.45798e-10	0.00238941	2.76764e-06	0.000891266	0.0354256
243	02:38:13	9493839	4.39889e-11	2.9158e-11	8.28482e-09	1.452e-11	1.67669e-09	2.85048e-11	5.8316e-14	8.2434e-09	5.81811e-10	0.0034579	7.07427e-06	0.00176141	0.0705791
244	02:38:52	9532836	4.50424e-12	5.91556e-11	6.16616e-09	1.25151e-11	1.51976e-09	2.91875e-12	1.18311e-13	6.13533e-09	5.27357e-10	0.000475728	1.92836e-05	0.00203984	0.0859541
245	02:39:34	9574954	2.94979e-11	3.6171e-11	5.71892e-09	1.18572e-11	1.38922e-09	1.91146e-11	7.2342e-14	5.69033e-09	4.82059e-10	0.00335915	1.27132e-05	0.00208375	0.0847156
246	02:40:16	9616051	3.29056e-11	3.33147e-11	5.55879e-09	1.01308e-11	1.32624e-09	2.13228e-11	6.66294e-14	5.531e-09	4.60205e-10	0.00385515	1.20465e-05	0.00183164	0.0832048
247	02:40:57	9657149	2.64019e-11	4.42285e-11	5.46538e-09	9.54278e-12	1.23937e-09	1.71084e-11	8.8457e-14	5.43805e-09	4.30061e-10	0.00314606	1.62663e-05	0.00175482	0.0790837
248	02:41:38	9698246	2.60042e-11	3.45432e-11	5.36653e-09	9.07515e-12	1.18729e-09	1.68507e-11	6.90864e-14	5.3397e-09	4.1199e-10	0.00315574	1.29383e-05	0.00169956	0.077156
249	02:42:19	9739344	2.84122e-11	2.87485e-11	5.31218e-09	8.17968e-12	1.14579e-09	1.84111e-11	5.7497e-14	5.28562e-09	3.97589e-10	0.00348324	1.0878e-05	0.00154753	0.0752209
250	02:43:00	9780441	2.71544e-11	3.84747e-11	5.22989e-09	7.8948e-12	1.09719e-09	1.75961e-11	7.69494e-14	5.20374e-09	3.80725e-10	0.00338142	1.47873e-05	0.00151714	0.0731637
251	02:43:41	9821539	1.83179e-11	3.28539e-11	5.1922e-09	7.50565e-12	1.06876e-09	1.187e-11	6.57078e-14	5.16624e-09	3.7086e-10	0.00229761	1.27187e-05	0.00145283	0.0717852
252	02:44:22	9862636	3.01322e-11	3.25775e-11	5.20565e-09	6.92085e-12	1.04861e-09	1.95257e-11	6.5155e-14	5.17962e-09	3.63868e-10	0.00376971	1.25791e-05	0.00133617	0.0702499
253	02:45:03	9903734	2.60149e-11	3.4789e-11	5.17972e-09	6.97782e-12	1.02269e-09	1.68577e-11	6.9578e-14	5.15382e-09	3.54873e-10	0.0032709	1.35003e-05	0.00135391	0.0688564
254	02:45:44	9944831	2.60472e-11	3.34272e-11	5.1682e-09	6.7166e-12	1.01369e-09	1.68786e-11	6.68544e-14	5.14236e-09	3.5175e-10	0.00328227	1.30007e-05	0.00130613	0.0684025
255	02:46:25	9985929	9.06223e-12	3.20144e-11	5.13017e-09	6.12212e-12	9.85493e-10	5.87233e-12	6.40288e-14	5.10452e-09	3.41966e-10	0.00115042	1.25436e-05	0.00119935	0.0669928
256	02:47:07	10027026	1.50499e-13	3.06323e-11	5.15033e-09	6.17695e-12	9.639e-10	9.75234e-14	6.12646e-14	5.12458e-09	3.34473e-10	1.90305e-05	1.19551e-05	0.00120536	0.0652685
257	02:47:48	10068124	1.61464e-11	3.80549e-11	5.15477e-09	5.934e-12	9.65936e-10	1.04629e-11	7.61098e-14	5.129e-09	3.3518e-10	0.00203994	1.48391e-05	0.00115695	0.06535
258	02:48:29	10109221	6.79398e-12	3.36832e-11	5.1415e-09	5.9641e-12	9.4375e-10	4.4025e-12	6.73664e-14	5.11579e-09	3.27481e-10	0.00086057	1.31683e-05	0.00116582	0.0640138
259	02:49:10	10150319	1.69527e-11	3.08268e-11	5.14752e-09	4.13875e-12	9.36429e-10	1.09853e-11	6.16536e-14	5.12178e-09	3.24941e-10	0.00214483	1.20375e-05	0.000808068	0.0634429
260	02:49:51	10191416	2.95624e-11	2.69364e-11	4.66937e-09	6.12212e-12	9.24914e-10	1.91564e-11	5.38728e-14	4.64602e-09	3.20945e-10	0.00412319	1.15955e-05	0.00131771	0.0690795
261	02:50:32	10232514	1.94574e-11	3.09702e-11	5.06981e-09	5.54377e-12	9.14357e-10	1.26084e-11	6.19404e-14	5.04446e-09	3.17282e-10	0.00249945	1.22789e-05	0.00109898	0.0628971
262	02:51:13	10273611	2.64987e-11	2.56361e-11	1.41452e-07	6.18125e-12	9.35221e-10	1.71712e-11	5.12722e-14	1.40745e-07	3.24522e-10	0.000122002	3.64292e-07	4.39182e-05	0.00230575
263	02:51:56	10316249	1.15024e-11	2.3138e-11	3.51524e-07	5.01487e-12	7.9965e-10	7.45356e-12	4.6276e-14	3.49766e-07	2.77479e-10	2.13101e-05	1.32305e-07	1.43378e-05	0.000793325
264	02:52:34	10354746	4.24624e-12	3.63656e-11	3.99451e-07	4.47522e-12	7.2035e-10	2.75156e-12	7.27312e-14	3.97454e-07	2.49961e-10	6.92298e-06	1.82993e-07	1.12597e-05	0.000628907
265	02:53:13	10393244	5.36574e-10	2.38342e-11	3.98376e-07	1.53552e-10	4.48849e-09	3.477e-10	4.76684e-14	3.96384e-07	1.55751e-09	0.000877179	1.20258e-07	0.000387382	0.00392928
266	02:53:57	10437072	9.73429e-09	2.57078e-11	3.66484e-07	2.80284e-10	4.19682e-09	6.30782e-09	5.14156e-14	3.64652e-07	1.4563e-09	0.0172982	1.40999e-07	0.000768635	0.00399367
267	02:54:30	10470489	1.18135e-08	2.45713e-11	3.59676e-07	2.74273e-10	2.87239e-09	7.65515e-09	4.91426e-14	3.57878e-07	9.96719e-10	0.0213904	1.37317e-07	0.000766388	0.00278508
268	02:55:00	10500256	1.23208e-08	2.37523e-11	3.56003e-07	2.63488e-10	2.19188e-09	7.98388e-09	4.75046e-14	3.54223e-07	7.60582e-10	0.0225391	1.34109e-07	0.000743848	0.00214719
269	02:55:30	10530022	1.01661e-08	3.12261e-11	3.67738e-07	1.33305e-10	1.55659e-09	6.58763e-09	6.24522e-14	3.65899e-07	5.40137e-10	0.0180039	1.70681e-07	0.000364322	0.00147619
270	02:56:02	10562379	3.09318e-09	2.34759e-11	3.33249e-07	5.72437e-11	1.25569e-09	2.00438e-09	4.69518e-14	3.31583e-07	4.35724e-10	0.00604489	1.41599e-07	0.000172638	0.00131407
271	02:56:34	10594246	1.19164e-09	2.9117e-11	3.67112e-07	2.97452e-11	1.07764e-09	7.72183e-10	5.8234e-14	3.65276e-07	3.73941e-10	0.00211397	1.59424e-07	8.1432e-05	0.00102372
272	02:57:13	10633653	4.43275e-10	1.28488e-11	3.54033e-07	1.69226e-11	1.44621e-09	2.87242e-10	2.56976e-14	3.52263e-07	5.01835e-10	0.00081542	7.29501e-08	4.80397e-05	0.0014246
273	02:57:52	10672151	1.52714e-10	2.95164e-11	8.25957e-08	1.71527e-11	1.98875e-09	9.89587e-11	5.90328e-14	8.21827e-08	6.90096e-10	0.00120413	7.18312e-07	0.000208714	0.0083971
274	02:58:30	10710649	6.85526e-11	2.19197e-11	2.01527e-08	1.58293e-11	1.8305e-09	4.44221e-11	4.38394e-14	2.00519e-08	6.35183e-10	0.00221535	2.18629e-06	0.000789415	0.0316769
275	02:59:10	10750166	4.56121e-11	2.34861e-11	8.69233e-09	1.45286e-11	1.66554e-09	2.95566e-11	4.69722e-14	8.64887e-09	5.77942e-10	0.0034174	5.43102e-06	0.00167983	0.0668229
276	02:59:49	10789164	5.23309e-11	3.29972e-11	6.26848e-09	1.25538e-11	1.51364e-09	3.39104e-11	6.59944e-14	6.23714e-09	5.25233e-10	0.00543686	1.05809e-05	0.00201275	0.0842106
277	03:00:31	10831282	4.33439e-11	2.72947e-11	5.72168e-09	1.1324e-11	1.40709e-09	2.80868e-11	5.45894e-14	5.69307e-09	4.8826e-10	0.00493351	9.58874e-06	0.00198908	0.0857639
278	2003-01-12	10872379	1.21044e-11	3.45842e-11	5.53291e-09	1.04285e-11	1.32011e-09	7.84365e-12	6.91684e-14	5.50525e-09	4.58078e-10	0.00142476	1.25641e-05	0.00189428	0.0832076
279	03:01:53	10913476	9.67498e-12	3.94268e-11	5.43373e-09	9.36648e-12	1.24729e-09	6.26939e-12	7.88536e-14	5.40656e-09	4.3281e-10	0.00115959	1.45848e-05	0.00173243	0.0800527
280	03:02:34	10954574	2.69502e-11	3.45739e-11	5.34738e-09	8.55378e-12	1.17566e-09	1.74637e-11	6.91478e-14	5.32064e-09	4.07954e-10	0.00328226	1.29961e-05	0.00160766	0.0766738
281	2003-03-15	10995671	2.10699e-11	2.7479e-11	5.29534e-09	8.43015e-12	1.12827e-09	1.36533e-11	5.4958e-14	5.26886e-09	3.9151e-10	0.00259132	1.04307e-05	0.00159999	0.0743063
282	03:03:56	11036769	1.75869e-11	3.29153e-11	5.29239e-09	7.76042e-12	1.10979e-09	1.13963e-11	6.58306e-14	5.26593e-09	3.85097e-10	0.00216416	1.25012e-05	0.0014737	0.07313
283	03:04:37	11077866	2.18762e-11	3.71642e-11	5.25508e-09	7.3057e-12	1.04369e-09	1.41758e-11	7.43284e-14	5.2288e-09	3.6216e-10	0.00271109	1.42152e-05	0.0013972	0.0692626
284	2003-05-18	11118964	2.62192e-11	4.37472e-11	5.19622e-09	7.3057e-12	1.03049e-09	1.699e-11	8.74944e-14	5.17024e-09	3.5758e-10	0.00328612	1.69227e-05	0.00141303	0.0691612
285	03:06:00	11160061	2.18332e-11	3.80447e-11	5.15393e-09	7.15197e-12	1.00829e-09	1.41479e-11	7.60894e-14	5.12816e-09	3.49877e-10	0.00275887	1.48376e-05	0.00139465	0.0682265
286	03:06:41	11201159	1.65657e-11	2.27797e-11	5.14622e-09	6.5876e-12	9.84421e-10	1.07346e-11	4.55594e-14	5.12049e-09	3.41594e-10	0.0020964	8.89747e-06	0.00128652	0.0667112
287	2003-07-22	11242256	1.91027e-11	2.90966e-11	5.12134e-09	6.36185e-12	9.63057e-10	1.23785e-11	5.81932e-14	5.09573e-09	3.34181e-10	0.0024292	1.142e-05	0.00124847	0.0655805
288	2003-08-03	11283354	1.21259e-11	3.86999e-11	5.10385e-09	6.81872e-12	9.44821e-10	7.85758e-12	7.73998e-14	5.07833e-09	3.27853e-10	0.00154728	1.52412e-05	0.00134271	0.0645592
289	03:08:44	11324451	5.93399e-12	2.67623e-11	5.0756e-09	6.2565e-12	9.37507e-10	3.84523e-12	5.35246e-14	5.05022e-09	3.25315e-10	0.000761397	1.05985e-05	0.00123886	0.064416
290	2003-09-25	11365549	1.84792e-11	3.26491e-11	5.08477e-09	6.0888e-12	9.22271e-10	1.19745e-11	6.52982e-14	5.05935e-09	3.20028e-10	0.00236681	1.29065e-05	0.00120348	0.0632548
291	2003-10-06	11406646	2.29619e-11	3.77272e-11	5.09475e-09	6.03505e-12	9.15914e-10	1.48793e-11	7.54544e-14	5.06928e-09	3.17822e-10	0.00293519	1.48846e-05	0.00119052	0.0626958
292	03:10:47	11447744	1.45124e-11	1.78347e-11	4.66006e-09	6.21565e-12	9.06671e-10	9.40404e-12	3.56694e-14	4.63676e-09	3.14615e-10	0.00202815	7.69274e-06	0.00134052	0.0678523
293	2003-11-28	11488841	1.86189e-11	3.9908e-11	5.00837e-09	5.59752e-12	8.81721e-10	1.2065e-11	7.9816e-14	4.98333e-09	3.05957e-10	0.00242108	1.60166e-05	0.00112325	0.0613962
294	2003-12-09	11529939	2.85842e-11	2.4039e-11	1.06783e-07	5.88455e-12	9.52621e-10	1.85226e-11	4.8078e-14	1.06249e-07	3.30559e-10	0.000174331	4.52503e-07	5.53845e-05	0.00311117
295	03:12:52	11572577	3.54749e-12	1.3678e-11	3.27784e-07	5.22772e-12	8.00971e-10	2.29877e-12	2.7356e-14	3.26145e-07	2.77937e-10	7.04832e-06	8.38768e-08	1.60288e-05	0.000852188
296	03:13:31	11611074	7.03048e-12	2.4684e-11	3.83058e-07	4.77515e-12	7.00554e-10	4.55575e-12	4.9368e-14	3.81143e-07	2.43092e-10	1.19529e-05	1.29526e-07	1.25285e-05	0.000637798
297	03:14:09	11649571	8.01841e-11	3.40723e-11	3.89238e-07	1.19308e-10	3.86532e-09	5.19593e-11	6.81446e-14	3.87292e-07	1.34127e-09	0.000134161	1.75952e-07	0.000308057	0.00346319
298	03:14:53	11693400	9.03234e-09	3.4881e-11	3.63259e-07	2.71799e-10	4.22406e-09	5.85296e-09	6.9762e-14	3.61443e-07	1.46575e-09	0.0161933	1.9301e-07	0.000751984	0.00405527
299	03:15:26	11726817	1.16053e-08	3.13591e-11	3.59049e-07	2.72323e-10	2.97473e-09	7.52023e-09	6.27182e-14	3.57254e-07	1.03223e-09	0.0210501	1.75556e-07	0.000762268	0.00288935
300	03:15:56	11756584	1.20903e-08	3.40518e-11	3.53137e-07	2.60295e-10	2.23326e-09	7.83451e-09	6.81036e-14	3.51371e-07	7.74941e-10	0.022297	1.93822e-07	0.000740798	0.00220548
301	03:16:26	11786351	1.10718e-08	1.8838e-11	3.54212e-07	1.59735e-10	1.63937e-09	7.17453e-09	3.7676e-14	3.52441e-07	5.68861e-10	0.0203567	1.069e-07	0.000453225	0.00161406
302	03:16:58	11818707	2.01324e-09	2.5503e-11	1.51664e-07	5.01853e-11	1.17998e-09	1.30458e-09	5.1006e-14	1.50906e-07	4.09453e-10	0.008645	3.37999e-07	0.000332561	0.0027133
303	03:17:30	11850574	1.19398e-09	3.04173e-11	1.57308e-07	3.56631e-11	1.15179e-09	7.73699e-10	6.08346e-14	1.56521e-07	3.99671e-10	0.00494309	3.88666e-07	0.000227848	0.00255346
304	03:18:09	11889982	7.09133e-10	1.89916e-11	1.65102e-07	2.41316e-11	1.08184e-09	4.59518e-10	3.79832e-14	1.64276e-07	3.75398e-10	0.00279722	2.31215e-07	0.000146896	0.00228516
305	03:18:48	11928479	4.32805e-10	4.0553e-11	1.72716e-07	1.68173e-11	1.05136e-09	2.80458e-10	8.1106e-14	1.71852e-07	3.64822e-10	0.00163197	4.71951e-07	9.7859e-05	0.00212288
306	03:19:26	11966976	2.69319e-10	2.86256e-11	1.80152e-07	1.32268e-11	9.92336e-10	1.74519e-10	5.72512e-14	1.79251e-07	3.44341e-10	0.000973598	3.19391e-07	7.37892e-05	0.00192099
307	03:20:05	12005474	1.80685e-10	3.12466e-11	1.86512e-07	1.05661e-11	9.78057e-10	1.17084e-10	6.24932e-14	1.85579e-07	3.39386e-10	0.00063091	3.36746e-07	5.69357e-05	0.00182879
308	03:20:43	12043971	1.46178e-10	3.31406e-11	1.91707e-07	1.23313e-11	1.23157e-09	9.47233e-11	6.62812e-14	1.90748e-07	4.27355e-10	0.000496588	3.4748e-07	6.46469e-05	0.00224041
309	03:21:22	12082469	2.9585e-10	3.28539e-11	1.96008e-07	1.61067e-11	1.27776e-09	1.91711e-10	6.57078e-14	1.95028e-07	4.43383e-10	0.000982991	3.36915e-07	8.25866e-05	0.00227343
310	03:22:00	12120966	3.46826e-10	2.84311e-11	2.02816e-07	1.6369e-11	1.15059e-09	2.24743e-10	5.68622e-14	2.01802e-07	3.99255e-10	0.00111368	2.81772e-07	8.11142e-05	0.00197845
311	03:22:39	12159464	3.30884e-10	1.6944e-11	2.06937e-07	1.44394e-11	1.02137e-09	2.14413e-10	3.3888e-14	2.05902e-07	3.54415e-10	0.00104133	1.64583e-07	7.01274e-05	0.00172128
312	03:23:17	12197961	2.83756e-10	2.24418e-11	2.12402e-07	1.35579e-11	9.26221e-10	1.83874e-10	4.48836e-14	2.1134e-07	3.21399e-10	0.000870038	2.12376e-07	6.41521e-05	0.00152077
313	03:23:56	12236459	2.32769e-10	2.8769e-11	2.18762e-07	1.26387e-11	8.858e-10	1.50834e-10	5.7538e-14	2.17668e-07	3.07373e-10	0.000692955	2.64338e-07	5.80641e-05	0.00141212
314	03:24:34	12274956	2.09549e-10	2.14794e-11	2.23062e-07	1.14218e-11	8.41757e-10	1.35788e-10	4.29588e-14	2.21947e-07	2.9209e-10	0.000611803	1.93555e-07	5.14619e-05	0.00131604
315	03:25:13	12313454	1.62324e-11	3.30791e-11	1.00221e-08	3.05407e-12	1.00961e-09	1.05186e-11	6.61582e-14	9.97199e-09	3.50335e-10	0.00105481	6.6344e-06	0.000306265	0.0351319
	03:25:52

## Sheet: Conc vector analysis
Index	Time	ms	Ethylene mbar	Carbon monoxide mbar	Argon mbar	Ethylene oxide mbar	Carbon dioxide mbar	Corrected Et	Corrected CO	Corrected Ar	Corrected CO2	Et (ć)	CO (ć)	EtO (ć)	CO2 (ć)		Conver %	Selectiv %	Yield %
1	2022-03-11 11:25:46	14689	6.10384e-11	6.9455e-11	6.54697e-09	1.25216e-11	1.54076e-09	3.95529e-11	1.3891e-13	6.51424e-09	5.34644e-10	0.00607176	2.13241e-05	0.00192219	0.0820731		87.6191	4.47339	3.91954
2	2022-03-11 11:26:39	67312	4.55369e-11	6.01999e-11	6.61548e-09	8.7419e-12	1.45029e-09	2.95079e-11	1.204e-13	6.5824e-09	5.03251e-10	0.00448285	1.82912e-05	0.00132807	0.0764539		89.8226	3.35675	3.01512
3	2022-03-11 11:27:20	108409	3.19167e-11	5.98109e-11	5.8587e-09	8.0195e-12	1.29576e-09	2.0682e-11	1.19622e-13	5.82941e-09	4.49629e-10	0.00354788	2.05204e-05	0.0013757	0.0771311		91.8438	3.44342	3.16257
4	2022-03-11 11:28:01	149506	2.94657e-11	6.08961e-11	6.19398e-09	7.04017e-12	1.26876e-09	1.90938e-11	1.21792e-13	6.16301e-09	4.4026e-10	0.00309812	1.97618e-05	0.00114233	0.0714358		92.2485	3.09824	2.85809
5	2022-03-11 11:28:42	190604	2.76812e-11	4.36039e-11	1.53366e-07	8.1829e-12	1.61826e-09	1.79374e-11	8.72078e-14	1.52599e-07	5.61536e-10	0.000117546	5.71483e-07	5.36235e-05	0.00367981		94.1559	2.83151	2.66603
6	2022-03-11 11:29:25	233242	3.21424e-11	3.24751e-11	4.05184e-07	6.53277e-12	1.15191e-09	2.08283e-11	6.49502e-14	4.03158e-07	3.99713e-10	5.16628e-05	1.61104e-07	1.6204e-05	0.000991454		90.8346	3.16477	2.87471
7	2022-03-11 11:30:03	271739	1.48027e-11	3.53213e-11	4.54276e-07	5.62655e-12	1.01297e-09	9.59215e-12	7.06426e-14	4.52005e-07	3.51501e-10	2.12214e-05	1.56287e-07	1.2448e-05	0.000777648		94.978	3.10153	2.94577
8	2022-03-11 11:30:42	310236	6.92879e-10	3.3591e-11	4.49708e-07	2.63683e-10	1.37508e-08	4.48986e-10	6.7182e-14	4.47459e-07	4.77153e-09	0.00100341	1.50141e-07	0.000589289	0.0106636		85.5094	9.95225	8.51011
9	2022-03-11 11:31:27	355646	1.2171e-08	3.90787e-11	4.42809e-07	4.64672e-10	1.5093e-08	7.88681e-09	7.81574e-14	4.40595e-07	5.23727e-09	0.0179004	1.77391e-07	0.00105465	0.0118868		28.1067	15.0704	4.23578
10	2022-03-11 11:31:57	385373	1.33084e-08	4.19147e-11	4.01422e-07	4.63626e-10	1.05719e-08	8.62384e-09	8.38294e-14	3.99415e-07	3.66845e-09	0.0215912	2.09881e-07	0.00116076	0.00918456		21.0396	20.1761	4.24498
11	2022-03-11 11:32:27	415102	1.40723e-08	5.0832e-11	3.94703e-07	4.34001e-10	7.2025e-09	9.11885e-09	1.01664e-13	3.92729e-07	2.49927e-09	0.0232192	2.58865e-07	0.00110509	0.00636384		15.586	25.7768	4.01758
12	2022-03-11 11:32:56	444830	1.28737e-08	4.95318e-11	4.19876e-07	2.61936e-10	4.29688e-09	8.34216e-09	9.90636e-14	4.17777e-07	1.49102e-09	0.019968	2.37121e-07	0.000626976	0.00356893		10.7757	25.9988	2.80156
13	2022-03-11 11:33:29	477216	4.06132e-09	3.77887e-11	3.58063e-07	1.19703e-10	2.75061e-09	2.63174e-09	7.55774e-14	3.56273e-07	9.54462e-10	0.00738686	2.12134e-07	0.000335987	0.00267902		18.4895	20.0517	3.70746
14	2022-03-11 11:34:01	509084	1.49258e-09	3.14002e-11	3.81445e-07	6.66446e-11	2.15636e-09	9.67192e-10	6.28004e-14	3.79538e-07	7.48257e-10	0.00254834	1.65465e-07	0.000175594	0.0019715		31.3072	15.1189	4.73329
15	2022-03-11 11:34:40	548492	5.15225e-10	3.59561e-11	3.92374e-07	3.51568e-11	2.01971e-09	3.33866e-10	7.19122e-14	3.90412e-07	7.00839e-10	0.000855162	1.84196e-07	9.00505e-05	0.00179513		53.5961	9.11713	4.88643
16	2022-03-11 11:35:18	586989	1.87006e-10	2.49092e-11	1.0311e-07	2.66911e-11	2.72446e-09	1.2118e-10	4.98184e-14	1.02594e-07	9.45388e-10	0.00118115	4.85586e-07	0.000260161	0.0092148		80.4734	5.34453	4.30093
17	2022-03-11 11:35:57	625486	7.79911e-11	3.49528e-11	2.37104e-08	2.2246e-11	2.4941e-09	5.05382e-11	6.99056e-14	2.35918e-08	8.65453e-10	0.00214219	2.96313e-06	0.000942953	0.0366844		90.0032	4.88915	4.40039
18	2022-03-11 11:36:37	665004	4.18711e-11	3.50653e-11	9.25667e-09	1.91393e-11	2.22306e-09	2.71325e-11	7.01306e-14	9.21039e-09	7.71402e-10	0.00294586	7.61429e-06	0.00207801	0.0837535		93.7194	4.72721	4.43031
19	2022-03-11 11:37:16	704001	3.57974e-11	3.36115e-11	6.28325e-09	1.67452e-11	1.99883e-09	2.31967e-11	6.7223e-14	6.25183e-09	6.93594e-10	0.00371039	1.07525e-05	0.00267845	0.110942		94.0025	4.6057	4.32947
20	2022-03-11 11:37:58	746119	4.22904e-11	2.84516e-11	5.64543e-09	1.54714e-11	1.77819e-09	2.74042e-11	5.69032e-14	5.6172e-09	6.17032e-10	0.00487862	1.01302e-05	0.00275429	0.109847		92.2019	4.77489	4.40254
21	2022-03-11 11:38:39	787216	1.84254e-11	4.90813e-11	5.41917e-09	1.41771e-11	1.68305e-09	1.19397e-11	9.81626e-14	5.39207e-09	5.84018e-10	0.0022143	1.8205e-05	0.00262925	0.108311		96.2475	4.62948	4.45576
22	2022-03-11 11:39:20	828314	3.57221e-11	5.17125e-11	5.30354e-09	1.32053e-11	1.56571e-09	2.31479e-11	1.03425e-13	5.27702e-09	5.43301e-10	0.00438655	1.95991e-05	0.00250242	0.102956		92.4858	4.63494	4.28666
23	2022-03-11 11:40:01	869411	2.21342e-11	4.94396e-11	5.25134e-09	1.21421e-11	1.47921e-09	1.4343e-11	9.88792e-14	5.22508e-09	5.13286e-10	0.00274502	1.89239e-05	0.00232381	0.098235		94.935	4.51657	4.28781
24	2022-03-11 11:40:42	910509	2.86057e-11	4.01947e-11	5.23208e-09	1.17873e-11	1.42534e-09	1.85365e-11	8.03894e-14	5.20592e-09	4.94593e-10	0.00356066	1.54419e-05	0.00226421	0.0950059		93.324	4.5489	4.24522
25	2022-03-11 11:41:23	951606	2.56494e-11	2.96085e-11	5.17914e-09	1.11853e-11	1.36522e-09	1.66208e-11	5.9217e-14	5.15324e-09	4.73731e-10	0.00322531	1.14912e-05	0.00217054	0.0919288		93.7209	4.50874	4.22563
26	2022-03-11 11:42:04	992704	2.90787e-11	3.38266e-11	5.18661e-09	1.05102e-11	1.32467e-09	1.8843e-11	6.76532e-14	5.16068e-09	4.5966e-10	0.00365126	1.31094e-05	0.00203659	0.0890698		92.7308	4.37243	4.05459
27	2022-03-11 11:42:45	1033801	2.30049e-11	4.0512e-11	5.15789e-09	1.00018e-11	1.28592e-09	1.49072e-11	8.1024e-14	5.1321e-09	4.46214e-10	0.00290469	1.57877e-05	0.00194887	0.0869457		93.9904	4.28987	4.03206
28	2022-03-11 11:43:26	1074899	3.85924e-11	4.03175e-11	5.11283e-09	1.00394e-11	1.25593e-09	2.50079e-11	8.0635e-14	5.08727e-09	4.35808e-10	0.00491578	1.58504e-05	0.00197344	0.0856664		90.1151	4.40356	3.96828
29	2022-03-11 11:44:07	1115996	2.29834e-11	4.68391e-11	5.14907e-09	9.42775e-12	1.21501e-09	1.48932e-11	9.36782e-14	5.12332e-09	4.21608e-10	0.00290695	1.82847e-05	0.00184016	0.082292		93.6671	4.27992	4.00887
30	2022-03-11 11:44:49	1157094	1.55874e-11	3.69491e-11	5.12801e-09	8.99023e-12	1.19558e-09	1.01006e-11	7.38982e-14	5.10237e-09	4.14866e-10	0.0019796	1.44831e-05	0.00176197	0.0813085		95.5418	4.15329	3.96813
31	2022-03-11 11:45:30	1198191	1.68129e-11	4.27337e-11	5.08525e-09	8.8193e-12	1.18958e-09	1.08948e-11	8.54674e-14	5.05982e-09	4.12784e-10	0.00215319	1.68914e-05	0.00174301	0.0815808		95.1825	4.09716	3.89978
32	2022-03-11 11:46:11	1239289	2.49829e-11	4.36449e-11	5.05065e-09	8.514e-12	1.16906e-09	1.61889e-11	8.72898e-14	5.0254e-09	4.05664e-10	0.00322142	1.73697e-05	0.00169419	0.0807227		92.8864	4.02764	3.74113
33	2022-03-11 11:46:52	1280386	2.37897e-11	2.77451e-11	5.07781e-09	8.3377e-12	1.14051e-09	1.54157e-11	5.54902e-14	5.05242e-09	3.95757e-10	0.00305116	1.09829e-05	0.00165024	0.0783302		93.0453	4.04264	3.76149
34	2022-03-11 11:47:33	1321484	1.66947e-11	1.06475e-11	5.0429e-09	8.3635e-12	1.14411e-09	1.08182e-11	2.1295e-14	5.01769e-09	3.97006e-10	0.00215601	4.24399e-06	0.0016668	0.0791214		95.0306	4.04274	3.84184
35	2022-03-11 11:48:14	1362581	3.37441e-11	5.05863e-11	4.57081e-09	8.6688e-12	1.11699e-09	2.18662e-11	1.01173e-13	4.54796e-09	3.87596e-10	0.00480791	2.22457e-05	0.00190609	0.0852241		90.255	4.28053	3.86339
36	2022-03-11 11:48:55	1403679	-3.14974e-12	3.33351e-11	4.90583e-09	7.99263e-12	1.10356e-09	-2.04103e-12	6.66702e-14	4.8813e-09	3.82935e-10	-0.000418133	1.36583e-05	0.0016374	0.0784494		101.034	4.00646	4.04787
37	2022-03-11 11:49:36	1444776	8.05173e-12	4.04609e-11	6.51073e-08	8.20225e-12	1.27129e-09	5.21752e-12	8.09218e-14	6.47818e-08	4.41138e-10	8.054e-05	1.24914e-06	0.000126614	0.0068096		97.7706	3.58472	3.5048
38	2022-03-11 11:50:18	1486894	2.37359e-11	2.92399e-11	3.22499e-07	7.38202e-12	1.01418e-09	1.53809e-11	5.84798e-14	3.20887e-07	3.5192e-10	4.79324e-05	1.82244e-07	2.30051e-05	0.00109671		92.2613	4.02572	3.71418
39	2022-03-11 11:50:58	1526411	4.04199e-12	2.87485e-11	3.88701e-07	6.47365e-12	8.73436e-10	2.61921e-12	5.7497e-14	3.86757e-07	3.03082e-10	6.77223e-06	1.48664e-07	1.67383e-05	0.000783649		98.3697	4.09612	4.02934
40	2022-03-11 11:51:36	1564909	1.45447e-11	3.63144e-11	3.98645e-07	1.45397e-10	5.10025e-09	9.42497e-12	7.26288e-14	3.96652e-07	1.76979e-09	2.37613e-05	1.83105e-07	0.000366561	0.00446181		99.0935	14.1117	13.9838
41	2022-03-11 11:52:20	1608737	9.29839e-09	2.75404e-11	3.67738e-07	3.43328e-10	6.33578e-09	6.02536e-09	5.50808e-14	3.65899e-07	2.19852e-09	0.0164673	1.50535e-07	0.000938313	0.00600853		19.3173	23.799	4.59734
42	2022-03-11 11:52:54	1642155	1.2208e-08	2.12542e-11	3.68992e-07	3.41386e-10	4.34464e-09	7.91078e-09	4.25084e-14	3.67147e-07	1.50759e-09	0.0215466	1.1578e-07	0.000929835	0.00410623		12.1608	31.171	3.79066
43	2022-03-11 11:53:23	1671921	1.28327e-08	3.45023e-11	3.64872e-07	3.26621e-10	3.25391e-09	8.31559e-09	6.90046e-14	3.63048e-07	1.12911e-09	0.022905	1.9007e-07	0.000899664	0.00311008		9.6799	36.6492	3.54761
44	2022-03-11 11:53:53	1701687	1.25828e-08	3.81266e-11	3.87447e-07	2.18915e-10	2.36716e-09	8.15365e-09	7.62532e-14	3.8551e-07	8.21405e-10	0.0211503	1.97798e-07	0.000567859	0.0021307		7.16877	34.7674	2.4924
45	2022-03-11 11:54:26	1734045	4.2264e-09	3.89047e-11	3.37549e-07	8.63085e-11	1.73404e-09	2.73871e-09	7.78094e-14	3.35861e-07	6.01712e-10	0.00815428	2.31671e-07	0.000256977	0.00179155		12.3869	22.2902	2.76107
46	2022-03-11 11:54:57	1765911	1.55123e-09	1.88278e-11	3.59676e-07	4.44663e-11	1.46636e-09	1.0052e-09	3.76556e-14	3.57878e-07	5.08827e-10	0.00280877	1.05219e-07	0.00012425	0.00142179		22.92	14.8767	3.40974
47	2022-03-11 11:55:37	1805318	5.39864e-10	1.97492e-11	3.8467e-07	2.34113e-11	1.44261e-09	3.49832e-10	3.94984e-14	3.82747e-07	5.00586e-10	0.000914004	1.03197e-07	6.11666e-05	0.00130788		43.8973	8.55289	3.75448
48	2022-03-11 11:56:15	1843816	1.94983e-10	1.70156e-11	1.16727e-07	2.00949e-11	2.44803e-09	1.26349e-10	3.40312e-14	1.16143e-07	8.49466e-10	0.00108787	2.9301e-07	0.000173018	0.00731395		77.8799	4.51728	3.51805
49	2022-03-11 11:56:54	1882314	7.08531e-11	3.86487e-11	2.62344e-08	1.83545e-11	2.30741e-09	4.59128e-11	7.72974e-14	2.61032e-08	8.00671e-10	0.00175889	2.96122e-06	0.000703151	0.0306733		90.1187	4.38339	3.95025
50	2022-03-11 11:57:33	1921831	3.30777e-11	2.62504e-11	9.76733e-09	1.64926e-11	2.05774e-09	2.14343e-11	5.25008e-14	9.71849e-09	7.14036e-10	0.00220552	5.40215e-06	0.00169703	0.0734719		94.5732	4.41526	4.17565
51	2022-03-11 11:58:12	1960829	3.42171e-11	3.1523e-11	6.45796e-09	1.44802e-11	1.83901e-09	2.21727e-11	6.3046e-14	6.42567e-09	6.38136e-10	0.00345064	9.81158e-06	0.00225349	0.0993105		93.7674	4.34085	4.0703
52	2022-03-11 11:58:54	2002946	3.26154e-11	3.0489e-11	5.75896e-09	1.28032e-11	1.6912e-09	2.11348e-11	6.0978e-14	5.73017e-09	5.86846e-10	0.00368834	1.06416e-05	0.00223435	0.102414		93.5445	4.18054	3.91067
53	2022-03-11 11:59:36	2044044	2.95947e-11	4.84977e-11	5.54218e-09	1.17336e-11	1.57339e-09	1.91774e-11	9.69954e-14	5.51447e-09	5.45966e-10	0.00347764	1.75893e-05	0.00212778	0.0990061		93.6905	4.12045	3.86047
54	2022-03-11 12:00:17	2085141	1.36632e-11	5.14361e-11	5.41088e-09	1.11692e-11	1.47956e-09	8.85375e-12	1.02872e-13	5.38383e-09	5.13407e-10	0.00164451	1.91076e-05	0.00207458	0.0953611		96.8011	4.16879	4.03544
55	2022-03-11 12:00:58	2126239	1.86082e-11	4.15051e-11	5.31862e-09	1.0564e-11	1.41406e-09	1.20581e-11	8.30102e-14	5.29203e-09	4.90679e-10	0.00227854	1.56859e-05	0.00199621	0.0927204		95.5008	4.12745	3.94175
56	2022-03-11 12:01:39	2167336	2.08657e-11	3.7287e-11	5.26624e-09	9.80615e-12	1.34327e-09	1.3521e-11	7.4574e-14	5.23991e-09	4.66115e-10	0.00258038	1.42319e-05	0.00187144	0.0889547		94.7271	4.0371	3.82423
57	2022-03-11 12:02:20	2208434	2.90142e-11	3.44613e-11	5.23881e-09	9.17513e-12	1.30859e-09	1.88012e-11	6.89226e-14	5.21262e-09	4.54081e-10	0.00360686	1.32223e-05	0.00176018	0.0871119		92.6285	3.88365	3.59737
58	2022-03-11 12:03:01	2249531	2.69932e-11	4.10751e-11	5.22151e-09	9.05688e-12	1.25809e-09	1.74916e-11	8.21502e-14	5.1954e-09	4.36557e-10	0.00336674	1.58121e-05	0.00174325	0.0840276		92.8567	3.98321	3.69868
59	2022-03-11 12:03:42	2290629	2.42842e-11	2.67009e-11	5.22637e-09	8.50218e-12	1.21909e-09	1.57362e-11	5.34018e-14	5.20024e-09	4.23024e-10	0.00302605	1.02691e-05	0.00163496	0.0813471		93.3258	3.86391	3.60602
60	2022-03-11 12:04:23	2331726	1.54047e-11	4.34196e-11	5.16666e-09	8.29148e-12	1.18394e-09	9.98225e-12	8.68392e-14	5.14083e-09	4.10827e-10	0.00194176	1.68921e-05	0.00161287	0.0799146		95.5383	3.87908	3.70601
61	2022-03-11 12:05:04	2372824	2.36392e-11	3.65806e-11	5.19831e-09	8.0109e-12	1.15527e-09	1.53182e-11	7.31612e-14	5.17232e-09	4.00879e-10	0.00296157	1.41448e-05	0.0015488	0.0775046		93.1556	3.8424	3.57941
62	2022-03-11 12:05:45	2413921	1.98122e-11	3.93756e-11	5.17968e-09	7.79912e-12	1.13655e-09	1.28383e-11	7.87512e-14	5.15378e-09	3.94383e-10	0.00249105	1.52803e-05	0.00151328	0.076523		94.1073	3.80389	3.57974
63	2022-03-11 12:06:27	2455019	2.31984e-11	4.21399e-11	5.13938e-09	7.59918e-12	1.12179e-09	1.50326e-11	8.42798e-14	5.11368e-09	3.89261e-10	0.00293967	1.64812e-05	0.00148605	0.0761215		93.0823	3.75691	3.49702
64	2022-03-11 12:07:08	2496116	1.26419e-11	3.1308e-11	5.14421e-09	7.39385e-12	1.09911e-09	8.19195e-12	6.2616e-14	5.11849e-09	3.81391e-10	0.00160046	1.22333e-05	0.00144454	0.0745125		96.0294	3.73199	3.58381
65	2022-03-11 12:07:49	2537214	2.40262e-11	4.71463e-11	5.12563e-09	7.24012e-12	1.06624e-09	1.5569e-11	9.42926e-14	5.1e-09	3.69985e-10	0.00305274	1.84887e-05	0.00141963	0.0725461		92.5095	3.76541	3.48336
66	2022-03-11 12:08:30	2578311	2.15752e-11	5.06375e-11	5.14233e-09	7.0004e-12	1.08111e-09	1.39807e-11	1.01275e-13	5.11662e-09	3.75145e-10	0.00273242	1.97933e-05	0.00136817	0.073319		93.298	3.59689	3.35583
67	2022-03-11 12:09:11	2619409	2.43164e-11	2.87588e-11	4.77951e-09	7.30892e-12	1.04501e-09	1.5757e-11	5.75176e-14	4.75561e-09	3.62618e-10	0.00331335	1.20947e-05	0.0015369	0.0762506		92.2912	3.87439	3.57572
68	2022-03-11 12:09:52	2660506	1.59099e-11	4.39418e-11	5.01234e-09	7.08532e-12	1.03037e-09	1.03096e-11	8.78836e-14	4.98728e-09	3.57538e-10	0.00206718	1.76216e-05	0.00142068	0.0716901		94.7456	3.81139	3.61113
69	2022-03-11 12:10:33	2701604	1.52542e-11	2.37728e-11	4.47075e-08	7.08317e-12	1.1801e-09	9.88472e-12	4.75456e-14	4.4484e-08	4.09495e-10	0.000222209	1.06883e-06	0.00015923	0.00920545		95.5422	3.34342	3.19437
70	2022-03-11 12:11:15	2743721	2.58107e-11	1.42616e-11	3.21603e-07	6.15007e-12	9.24429e-10	1.67253e-11	2.85232e-14	3.19995e-07	3.20777e-10	5.22675e-05	8.91364e-08	1.92193e-05	0.00100244		90.8743	3.69257	3.35559
71	2022-03-11 12:11:55	2783239	1.62109e-11	9.8899e-12	3.94883e-07	5.5513e-12	8.28321e-10	1.05047e-11	1.97798e-14	3.92909e-07	2.87427e-10	2.67356e-05	5.0342e-08	1.41287e-05	0.000731538		93.4255	3.71884	3.47435
72	2022-03-11 12:12:33	2821736	7.93348e-12	1.25826e-11	4.09395e-07	9.59545e-11	3.59021e-09	5.1409e-12	2.51652e-14	4.07348e-07	1.2458e-09	1.26204e-05	6.17781e-08	0.000235559	0.00305833		99.2899	13.348	13.2532
73	2022-03-11 12:13:17	2865565	8.6149e-09	4.36142e-11	3.67022e-07	3.11625e-10	5.79576e-09	5.58246e-09	8.72284e-14	3.65187e-07	2.01113e-09	0.0152866	2.3886e-07	0.00085333	0.00550712		19.0912	23.6575	4.51651
74	2022-03-11 12:13:50	2898982	1.18384e-08	3.84644e-11	3.67918e-07	3.21287e-10	4.11548e-09	7.67128e-09	7.69288e-14	3.66078e-07	1.42807e-09	0.0209553	2.10143e-07	0.000877645	0.003901		11.8916	31.0314	3.69014
75	2022-03-11 12:14:17	2925499	1.25082e-08	3.9007e-11	3.61109e-07	3.03953e-10	2.99596e-09	8.10531e-09	7.8014e-14	3.59303e-07	1.0396e-09	0.0225584	2.17126e-07	0.000845951	0.00289337		9.22591	36.8969	3.40407
76	2022-03-11 12:14:47	2955266	1.27663e-08	2.83799e-11	3.64155e-07	2.69073e-10	2.38372e-09	8.27256e-09	5.67598e-14	3.62334e-07	8.27151e-10	0.0228313	1.5665e-07	0.00074261	0.00228284		7.62321	39.4144	3.00464
77	2022-03-11 12:15:19	2987623	5.19827e-09	3.05094e-11	3.36295e-07	9.25253e-11	1.60123e-09	3.36848e-09	6.10188e-14	3.34614e-07	5.55627e-10	0.0100668	1.82356e-07	0.000276514	0.0016605		9.90597	24.9819	2.4747
78	2022-03-11 12:15:51	3019489	1.8389e-09	1.98004e-11	3.53584e-07	4.56176e-11	1.33764e-09	1.19161e-09	3.96008e-14	3.51816e-07	4.64161e-10	0.00338702	1.12561e-07	0.000129663	0.00131933		18.9011	16.4259	3.10466
79	2022-03-11 12:16:30	3058897	6.18349e-10	2.7909e-11	3.85476e-07	2.24718e-11	1.1633e-09	4.0069e-10	5.5818e-14	3.83549e-07	4.03665e-10	0.00104469	1.4553e-07	5.85892e-05	0.00105245		35.8919	10.0172	3.59536
80	2022-03-11 12:17:09	3097394	2.20492e-10	1.95751e-11	1.50678e-07	1.88049e-11	2.23819e-09	1.42879e-10	3.91502e-14	1.49925e-07	7.76652e-10	0.000953004	2.61133e-07	0.000125429	0.00518028		74.0234	4.61866	3.41889
81	2022-03-11 12:17:47	3135891	9.59866e-11	3.43282e-11	3.26614e-08	1.74418e-11	2.16644e-09	6.21993e-11	6.86564e-14	3.24981e-08	7.51755e-10	0.00191394	2.11263e-06	0.000536702	0.0231323		86.3464	4.43413	3.82871
82	2022-03-11 12:18:27	3175409	5.97269e-11	3.29972e-11	1.10406e-08	1.57433e-11	1.9344e-09	3.8703e-11	6.59944e-14	1.09854e-08	6.71237e-10	0.00352313	6.00747e-06	0.00143311	0.0611026		90.0786	4.48023	4.03573
83	2022-03-11 12:19:06	3214406	3.22714e-11	3.67853e-11	6.6966e-09	1.34439e-11	1.73128e-09	2.09119e-11	7.35706e-14	6.66312e-09	6.00754e-10	0.00313845	1.10415e-05	0.00201766	0.0901611		93.7534	4.28344	4.01587
84	2022-03-11 12:19:48	3256524	3.19704e-11	3.7799e-11	5.80464e-09	1.2198e-11	1.59426e-09	2.07168e-11	7.5598e-14	5.77562e-09	5.53208e-10	0.00358694	1.30892e-05	0.00211198	0.0957834		93.3076	4.2231	3.94047
85	2022-03-11 12:20:29	3297621	4.08176e-11	1.9268e-11	5.52487e-09	1.11864e-11	1.47716e-09	2.64498e-11	3.8536e-14	5.49725e-09	5.12575e-10	0.00481146	7.01006e-06	0.00203491	0.0932421		91.0017	4.18194	3.80564
86	2022-03-11 12:21:10	3338719	3.39054e-11	3.63861e-11	5.39074e-09	1.06801e-11	1.39331e-09	2.19707e-11	7.27722e-14	5.36379e-09	4.83479e-10	0.00409612	1.35673e-05	0.00199115	0.0901376		91.994	4.23048	3.89179
87	2022-03-11 12:21:51	3379816	1.34804e-11	4.52625e-11	5.32433e-09	9.73628e-12	1.32731e-09	8.7353e-12	9.0525e-14	5.29771e-09	4.60577e-10	0.00164888	1.70876e-05	0.00183783	0.0869388		96.4891	4.0556	3.91322
88	2022-03-11 12:22:32	3420914	2.19514e-11	3.62428e-11	5.31017e-09	9.331e-12	1.25029e-09	1.42245e-11	7.24856e-14	5.28362e-09	4.33851e-10	0.00269219	1.37189e-05	0.00176602	0.0821124		94.0859	4.12342	3.87956
89	2022-03-11 12:23:14	3462011	1.92962e-11	3.83723e-11	5.28311e-09	8.65375e-12	1.20301e-09	1.25039e-11	7.67446e-14	5.25669e-09	4.17444e-10	0.00237867	1.45994e-05	0.00164623	0.079412		94.5616	3.9803	3.76384
90	2022-03-11 12:23:55	3503109	2.67029e-11	3.53418e-11	5.21103e-09	8.19795e-12	1.16091e-09	1.73035e-11	7.06836e-14	5.18497e-09	4.02836e-10	0.00333723	1.36324e-05	0.0015811	0.0776929		92.3758	3.91028	3.61215
91	2022-03-11 12:24:36	3544206	8.09473e-12	2.79909e-11	5.18379e-09	7.9593e-12	1.15047e-09	5.24539e-12	5.59818e-14	5.15787e-09	3.99213e-10	0.00101697	1.08537e-05	0.00154314	0.0773988		97.5355	3.83407	3.73958
92	2022-03-11 12:25:17	3585304	3.09492e-11	3.63042e-11	5.26332e-09	7.65937e-12	1.13643e-09	2.00551e-11	7.26084e-14	5.237e-09	3.94341e-10	0.0038295	1.38645e-05	0.00146255	0.075299		91.0835	3.73872	3.40535
93	2022-03-11 12:25:58	3626401	3.08417e-11	3.48299e-11	5.22906e-09	7.4304e-12	1.10884e-09	1.99854e-11	6.96598e-14	5.20291e-09	3.84767e-10	0.0038412	1.33886e-05	0.00142812	0.0739523		90.9089	3.71801	3.38
94	2022-03-11 12:26:39	3667499	3.69799e-12	3.22499e-11	5.2064e-09	7.19927e-12	1.09816e-09	2.3963e-12	6.44998e-14	5.18037e-09	3.81062e-10	0.000462573	1.24508e-05	0.00138972	0.0735588		98.8028	3.64037	3.59678
95	2022-03-11 12:27:20	3708596	2.03819e-11	2.97109e-11	5.20212e-09	6.9316e-12	1.09312e-09	1.32075e-11	5.94218e-14	5.17611e-09	3.79313e-10	0.00255162	1.148e-05	0.00133915	0.0732814		93.7055	3.52542	3.30351
96	2022-03-11 12:28:01	3749694	2.06507e-11	4.79551e-11	5.2236e-09	6.55105e-12	1.07164e-09	1.33817e-11	9.59102e-14	5.19748e-09	3.71859e-10	0.00257464	1.84532e-05	0.00126043	0.071546		93.5012	3.40264	3.18151
97	2022-03-11 12:28:41	3789751	2.05647e-11	3.8618e-11	5.20567e-09	6.71552e-12	1.06348e-09	1.33259e-11	7.7236e-14	5.17964e-09	3.69028e-10	0.00257275	1.49115e-05	0.00129652	0.0712458		93.4866	3.51105	3.28237
98	2022-03-11 12:29:22	3830849	1.99949e-11	5.61968e-11	5.23877e-09	6.52417e-12	1.05136e-09	1.29567e-11	1.12394e-13	5.21258e-09	3.64822e-10	0.00248566	2.1562e-05	0.00125162	0.0699888		93.5841	3.4521	3.23062
99	2022-03-11 12:30:03	3871946	7.86898e-12	3.95291e-11	5.00987e-09	6.66392e-12	1.03241e-09	5.0991e-12	7.90582e-14	4.98482e-09	3.58246e-10	0.00102293	1.58598e-05	0.00133684	0.0718674		97.3293	3.5861	3.49032
100	2022-03-11 12:30:45	3913044	1.98014e-11	2.9885e-11	5.00987e-09	6.31455e-12	1.01921e-09	1.28313e-11	5.977e-14	4.98482e-09	3.53666e-10	0.00257408	1.19904e-05	0.00126676	0.0709486		93.4537	3.44723	3.22157
101	2022-03-11 12:31:26	3954141	2.29727e-11	5.14566e-11	8.00417e-09	6.44892e-12	1.13704e-09	1.48863e-11	1.02913e-13	7.96415e-09	3.94553e-10	0.00186917	1.29221e-05	0.000809744	0.0495411		93.1921	3.1647	2.94925
102	2022-03-11 12:32:07	3995239	2.65954e-11	2.2749e-11	2.93116e-07	5.96625e-12	9.40143e-10	1.72338e-11	4.5498e-14	2.9165e-07	3.2623e-10	5.90907e-05	1.56002e-07	2.04569e-05	0.00111856		90.7513	3.52816	3.20185
103	2022-03-11 12:32:49	4037877	7.99798e-12	2.67726e-11	3.79563e-07	4.95252e-12	8.21129e-10	5.18269e-12	5.35452e-14	3.77665e-07	2.84932e-10	1.3723e-05	1.4178e-07	1.31135e-05	0.000754456		96.6044	3.35889	3.24483
104	2022-03-11 12:33:28	4076374	1.50392e-11	1.82032e-11	4.02228e-07	3.3813e-11	1.81946e-09	9.7454e-12	3.64064e-14	4.00217e-07	6.31353e-10	2.43503e-05	9.09667e-08	8.44867e-05	0.00157753		97.2873	9.67447	9.41203
105	2022-03-11 12:34:12	4120202	7.39894e-09	2.84721e-11	3.69351e-07	2.83512e-10	5.47326e-09	4.79451e-09	5.69442e-14	3.67504e-07	1.89922e-09	0.0130461	1.54948e-07	0.000771452	0.00516789		20.4582	22.9909	4.70351
106	2022-03-11 12:34:45	4153620	1.14541e-08	2.35885e-11	3.69799e-07	3.08914e-10	3.891e-09	7.42226e-09	4.7177e-14	3.6795e-07	1.35018e-09	0.0201719	1.28216e-07	0.000839554	0.00366946		11.7058	31.3929	3.6748
107	2022-03-11 12:35:15	4183386	1.23705e-08	2.8595e-11	3.63887e-07	2.97225e-10	2.85979e-09	8.01608e-09	5.719e-14	3.62068e-07	9.92347e-10	0.0221397	1.57954e-07	0.00082091	0.00274078		9.00648	37.4609	3.37391
108	2022-03-11 12:35:45	4213152	1.27972e-08	2.2319e-11	3.63259e-07	2.54651e-10	2.22906e-09	8.29259e-09	4.4638e-14	3.61443e-07	7.73484e-10	0.022943	1.235e-07	0.00070454	0.00213999		7.17948	39.7014	2.85036
109	2022-03-11 12:36:17	4245509	5.76562e-09	2.9414e-11	3.37818e-07	9.70424e-11	1.54279e-09	3.73612e-09	5.8828e-14	3.36129e-07	5.35348e-10	0.0111151	1.75016e-07	0.000288706	0.00159269		8.89436	26.6055	2.36639
110	2022-03-11 12:36:49	4277376	2.00906e-09	1.69645e-11	3.53226e-07	4.73505e-11	1.30247e-09	1.30187e-09	3.3929e-14	3.5146e-07	4.51957e-10	0.00370418	9.65373e-08	0.000134725	0.00128594		17.3529	17.3226	3.00597
111	2022-03-11 12:37:28	4316783	6.76345e-10	4.1157e-11	3.89417e-07	2.31888e-11	1.13451e-09	4.38272e-10	8.2314e-14	3.8747e-07	3.93675e-10	0.00113111	2.1244e-07	5.98467e-05	0.00101601		33.4277	10.5371	3.52232
112	2022-03-11 12:38:07	4355281	2.53914e-10	1.71385e-11	1.6752e-07	1.83147e-11	2.16692e-09	1.64536e-10	3.4277e-14	1.66682e-07	7.51921e-10	0.000987124	2.05643e-07	0.000109878	0.0045111		70.5569	4.64495	3.27734
113	2022-03-11 12:38:45	4393779	8.62256e-11	1.79473e-11	3.60561e-08	1.72623e-11	2.16044e-09	5.58742e-11	3.58946e-14	3.58758e-08	7.49673e-10	0.00155743	1.00052e-06	0.000481168	0.0208963		87.5278	4.40234	3.85327
114	2022-03-11 12:39:25	4433296	4.07101e-11	3.31509e-11	1.1863e-08	1.51349e-11	1.9512e-09	2.63801e-11	6.63018e-14	1.18037e-08	6.77066e-10	0.00223491	5.61704e-06	0.00128222	0.0573606		93.0593	4.27901	3.98202
115	2022-03-11 12:40:04	4472294	3.19382e-11	2.51651e-11	7.02047e-09	1.35256e-11	1.73488e-09	2.0696e-11	5.03302e-14	6.98537e-09	6.02003e-10	0.00296276	7.20509e-06	0.00193628	0.0861806		93.8267	4.29995	4.0345
116	2022-03-11 12:40:46	4514411	2.91754e-11	2.54211e-11	6.00791e-09	1.17949e-11	1.58694e-09	1.89057e-11	5.08422e-14	5.97787e-09	5.50668e-10	0.00316261	8.50507e-06	0.00197309	0.0921178		93.8229	4.10751	3.85379
117	2022-03-11 12:41:27	4555509	3.69691e-11	3.7502e-11	5.76328e-09	1.05532e-11	1.48712e-09	2.3956e-11	7.5004e-14	5.73446e-09	5.16031e-10	0.00417754	1.30795e-05	0.00184031	0.0899876		91.8117	3.92888	3.60717
118	2022-03-11 12:42:08	4596606	2.26394e-11	3.73382e-11	5.62167e-09	9.81475e-12	1.39342e-09	1.46703e-11	7.46764e-14	5.59356e-09	4.83517e-10	0.00262272	1.33504e-05	0.00175465	0.0864417		94.4907	3.90077	3.68586
119	2022-03-11 12:42:49	4637704	1.22657e-11	3.63451e-11	5.54402e-09	9.32778e-12	1.31724e-09	7.94817e-12	7.26902e-14	5.5163e-09	4.57082e-10	0.00144085	1.31773e-05	0.00169095	0.0828603		96.7671	3.9208	3.79404
120	2022-03-11 12:43:30	4678801	3.36581e-11	3.93449e-11	5.47387e-09	8.91713e-12	1.25401e-09	2.18104e-11	7.86898e-14	5.4465e-09	4.35141e-10	0.00400449	1.44478e-05	0.00163722	0.0798938		91.2174	3.93645	3.59073
121	2022-03-11 12:44:11	4719899	2.55419e-11	4.00513e-11	5.39714e-09	8.16462e-12	1.20457e-09	1.65512e-11	8.01026e-14	5.37015e-09	4.17986e-10	0.00308206	1.49163e-05	0.00152037	0.077835		92.9193	3.75908	3.4929
122	2022-03-11 12:44:52	4760996	3.09922e-11	2.9844e-11	5.42206e-09	7.8733e-12	1.17614e-09	2.00829e-11	5.9688e-14	5.39495e-09	4.08121e-10	0.00372255	1.10637e-05	0.00145938	0.0756486		91.3453	3.71446	3.39299
123	2022-03-11 12:45:34	4802094	3.01537e-11	3.04377e-11	5.41661e-09	7.56155e-12	1.12947e-09	1.95396e-11	6.08754e-14	5.38953e-09	3.91926e-10	0.00362548	1.12951e-05	0.00140301	0.0727199		91.2416	3.71474	3.38939
124	2022-03-11 12:46:15	4843191	2.32629e-11	2.45304e-11	5.39104e-09	7.40352e-12	1.11364e-09	1.50744e-11	4.90608e-14	5.36408e-09	3.86433e-10	0.00281024	9.14616e-06	0.0013802	0.0720408		93.012	3.68987	3.43202
125	2022-03-11 12:46:56	4884289	8.70748e-12	3.43077e-11	5.40129e-09	6.7553e-12	1.08712e-09	5.64245e-12	6.86154e-14	5.37428e-09	3.77231e-10	0.0010499	1.27674e-05	0.00125697	0.0701918		97.1935	3.45708	3.36005
126	2022-03-11 12:47:37	4925386	1.86404e-11	3.52599e-11	5.36215e-09	6.68972e-12	1.06228e-09	1.2079e-11	7.05198e-14	5.33534e-09	3.68611e-10	0.00226396	1.32175e-05	0.00125385	0.0690886		94.053	3.50191	3.29365
127	2022-03-11 12:48:18	4966484	1.97799e-11	3.90172e-11	5.38979e-09	6.27585e-12	1.07176e-09	1.28174e-11	7.80344e-14	5.36284e-09	3.71901e-10	0.00239003	1.45509e-05	0.00117025	0.0693477		93.7501	3.26416	3.06016
128	2022-03-11 12:48:59	5007581	2.09947e-11	4.40339e-11	5.33002e-09	6.22317e-12	1.05209e-09	1.36046e-11	8.80678e-14	5.30337e-09	3.65075e-10	0.00256527	1.6606e-05	0.00117344	0.0688383		93.2787	3.29609	3.07455
129	2022-03-11 12:49:40	5048679	2.01239e-11	3.9519e-11	5.28573e-09	6.02322e-12	1.02845e-09	1.30403e-11	7.9038e-14	5.2593e-09	3.56872e-10	0.00247947	1.50282e-05	0.00114525	0.0678554		93.3986	3.26464	3.04913
130	2022-03-11 12:50:21	5089776	2.33167e-11	3.9949e-11	5.23407e-09	6.42527e-12	1.00145e-09	1.51092e-11	7.9898e-14	5.2079e-09	3.47503e-10	0.00290121	1.53417e-05	0.00123375	0.0667262		92.2646	3.5653	3.28951
131	2022-03-11 12:51:02	5130874	4.49349e-12	3.18915e-11	5.03878e-09	6.5274e-12	9.86814e-10	2.91178e-12	6.3783e-14	5.01359e-09	3.42424e-10	0.000580778	1.2722e-05	0.00130194	0.0682993		98.3885	3.67179	3.61262
132	2022-03-11 12:51:43	5171971	2.48002e-11	4.65423e-11	4.96071e-09	6.25435e-12	9.777e-10	1.60705e-11	9.30846e-14	4.93591e-09	3.39262e-10	0.00325584	1.88587e-05	0.00126711	0.0687335		91.63	3.55498	3.25743
133	2022-03-11 12:52:25	5213069	1.86727e-11	3.60072e-11	6.43258e-09	6.16727e-12	1.08531e-09	1.20999e-11	7.20144e-14	6.40042e-09	3.76603e-10	0.00189049	1.12515e-05	0.000963573	0.0588403		94.1434	3.17076	2.98506
134	2022-03-11 12:53:06	5254166	1.59852e-11	1.90018e-11	2.85053e-07	6.10385e-12	9.0295e-10	1.03584e-11	3.80036e-14	2.83628e-07	3.13324e-10	3.65211e-05	1.33991e-07	2.15206e-05	0.0011047		94.0174	3.74965	3.52532
135	2022-03-11 12:53:48	5296804	1.57594e-11	1.45585e-11	3.76518e-07	5.30512e-12	7.98814e-10	1.02121e-11	2.9117e-14	3.74635e-07	2.77188e-10	2.72587e-05	7.77209e-08	1.41608e-05	0.000739889		93.3742	3.68632	3.44207
136	2022-03-11 12:54:27	5335301	9.59973e-12	1.09035e-11	4.02049e-07	2.37005e-11	1.53067e-09	6.22063e-12	2.1807e-14	4.00039e-07	5.31142e-10	1.55501e-05	5.45122e-08	5.92455e-05	0.00132773		97.8949	8.19285	8.02038
137	2022-03-11 12:55:11	5379130	7.07836e-09	3.1912e-11	3.68187e-07	2.74193e-10	5.51034e-09	4.58678e-09	6.3824e-14	3.66346e-07	1.91209e-09	0.0125203	1.74218e-07	0.000748454	0.00521935		21.1494	22.2872	4.71361
138	2022-03-11 12:55:44	5412547	1.12566e-08	3.91299e-11	3.69083e-07	3.01144e-10	3.92807e-09	7.29428e-09	7.82598e-14	3.67238e-07	1.36304e-09	0.0198626	2.13104e-07	0.000820025	0.0037116		11.8727	30.6444	3.63833
139	2022-03-11 12:56:14	5442314	1.22462e-08	1.90632e-11	3.61647e-07	2.89031e-10	2.84635e-09	7.93554e-09	3.81264e-14	3.59839e-07	9.87683e-10	0.022053	1.05954e-07	0.000803224	0.00274479		8.97973	36.9184	3.31517
140	2022-03-11 12:56:44	5472081	1.25936e-08	2.69261e-11	3.61199e-07	2.51496e-10	2.17424e-09	8.16065e-09	5.38522e-14	3.59393e-07	7.54461e-10	0.0227068	1.49842e-07	0.00069978	0.00209927		7.15354	39.9991	2.86135
141	2022-03-11 12:57:16	5504438	6.03324e-09	3.28744e-11	3.36832e-07	9.79422e-11	1.53596e-09	3.90954e-09	6.57488e-14	3.35148e-07	5.32978e-10	0.0116651	1.96178e-07	0.000292236	0.00159028		8.52746	26.8729	2.29158
142	2022-03-11 12:57:48	5536306	2.12508e-09	1.95137e-11	3.51613e-07	4.72054e-11	1.27249e-09	1.37705e-09	3.90274e-14	3.49855e-07	4.41554e-10	0.00393607	1.11553e-07	0.000134928	0.00126211		16.2914	17.6138	2.86954
143	2022-03-11 12:58:27	5575713	7.00221e-10	1.83569e-11	3.8897e-07	2.26169e-11	1.11111e-09	4.53743e-10	3.67138e-14	3.87025e-07	3.85555e-10	0.00117239	9.48615e-08	5.84378e-05	0.000996202		32.1917	10.4993	3.37991
144	2022-03-11 12:59:06	5614211	2.58762e-10	3.10418e-11	1.76658e-07	1.78632e-11	2.1302e-09	1.67678e-10	6.20836e-14	1.75775e-07	7.39179e-10	0.000953936	3.532e-07	0.000101626	0.00420527		69.7966	4.61005	3.21766
145	2022-03-11 12:59:44	5652709	7.77116e-11	2.67623e-11	3.76025e-08	1.72612e-11	2.10477e-09	5.03571e-11	5.35246e-14	3.74145e-08	7.30355e-10	0.00134593	1.43058e-06	0.000461351	0.0195207		88.3654	4.51314	3.98805
146	2022-03-11 13:00:24	5692226	6.12104e-11	1.80088e-11	1.20881e-08	1.55799e-11	1.88929e-09	3.96643e-11	3.60176e-14	1.20277e-08	6.55584e-10	0.00329776	2.99456e-06	0.00129534	0.0545063		89.6452	4.53709	4.06728
147	2022-03-11 13:01:03	5731224	3.94739e-11	1.68621e-11	6.96278e-09	1.43061e-11	1.70824e-09	2.55791e-11	3.37242e-14	6.92797e-09	5.92759e-10	0.00369215	4.86784e-06	0.00206498	0.0855604		92.3936	4.60444	4.2542
148	2022-03-11 13:01:45	5773341	2.69502e-11	4.59177e-11	5.9403e-09	1.21937e-11	1.53691e-09	1.74637e-11	9.18354e-14	5.9106e-09	5.33308e-10	0.00295465	1.55374e-05	0.00206302	0.0902291		94.1072	4.37217	4.11453
149	2022-03-11 13:02:26	5814439	2.33704e-11	4.19453e-11	5.64297e-09	1.11391e-11	1.43121e-09	1.5144e-11	8.38906e-14	5.61476e-09	4.9663e-10	0.00269718	1.49411e-05	0.0019839	0.0884509		94.4859	4.29259	4.05589
150	2022-03-11 13:03:07	5855536	2.95517e-11	3.62632e-11	5.51488e-09	9.85883e-12	1.33559e-09	1.91495e-11	7.25264e-14	5.48731e-09	4.6345e-10	0.00348978	1.32171e-05	0.00179666	0.0844585		92.6565	4.0803	3.78067
151	2022-03-11 13:03:48	5896634	1.87479e-11	3.96315e-11	5.48149e-09	9.2063e-12	1.27992e-09	1.21486e-11	7.9263e-14	5.45408e-09	4.44132e-10	0.00222744	1.45328e-05	0.00168796	0.0814312		95.01	3.98003	3.78143
152	2022-03-11 13:04:29	5937731	2.50474e-11	4.68494e-11	5.43306e-09	8.5699e-12	1.22485e-09	1.62307e-11	9.36988e-14	5.40589e-09	4.25023e-10	0.00300241	1.73327e-05	0.00158529	0.0786221		93.162	3.87553	3.61052
153	2022-03-11 13:05:10	5978829	2.23492e-11	3.43282e-11	5.40738e-09	8.514e-12	1.20086e-09	1.44823e-11	6.86564e-14	5.38034e-09	4.16698e-10	0.0026917	1.27606e-05	0.00158243	0.0774483		93.7409	3.92536	3.67966
154	2022-03-11 13:05:51	6019926	1.31687e-11	3.63861e-11	5.3733e-09	7.9808e-12	1.13391e-09	8.53332e-12	7.27722e-14	5.34643e-09	3.93467e-10	0.00159608	1.36114e-05	0.00149273	0.0735943		95.9991	3.89782	3.74187
155	2022-03-11 13:06:33	6061024	2.40047e-11	4.40953e-11	5.32309e-09	7.58627e-12	1.09768e-09	1.5555e-11	8.81906e-14	5.29647e-09	3.80895e-10	0.00293687	1.66508e-05	0.00143232	0.0719148		92.7188	3.82994	3.55108
156	2022-03-11 13:07:14	6102121	2.45529e-11	3.32225e-11	5.28986e-09	7.29925e-12	1.06084e-09	1.59103e-11	6.6445e-14	5.26341e-09	3.68111e-10	0.00302281	1.26239e-05	0.00138679	0.0699378		92.3249	3.81385	3.52113
157	2022-03-11 13:07:55	6143219	1.41147e-11	3.04377e-11	5.28961e-09	7.28957e-12	1.05281e-09	9.14633e-12	6.08754e-14	5.26316e-09	3.65325e-10	0.0017378	1.15663e-05	0.00138502	0.0694117		95.4068	3.83697	3.66073
158	2022-03-11 13:08:36	6184316	1.40932e-11	3.47991e-11	5.26313e-09	7.1638e-12	1.02413e-09	9.13239e-12	6.95982e-14	5.23681e-09	3.55373e-10	0.00174388	1.32902e-05	0.00136797	0.0678606		95.293	3.87473	3.69235
159	2022-03-11 13:09:17	6225414	3.01967e-11	3.66728e-11	5.24056e-09	6.7768e-12	1.01909e-09	1.95675e-11	7.33456e-14	5.21436e-09	3.53624e-10	0.00375261	1.40661e-05	0.00129964	0.0678174		90.37	3.69055	3.33515
160	2022-03-11 13:09:58	6266511	2.74662e-11	3.73075e-11	5.22248e-09	6.35432e-12	1.00134e-09	1.77981e-11	7.4615e-14	5.19637e-09	3.47465e-10	0.0034251	1.43591e-05	0.00122284	0.0668669		91.0075	3.52775	3.21051
161	2022-03-11 13:10:39	6307609	1.93822e-11	5.44563e-11	5.20864e-09	6.28015e-12	9.92214e-10	1.25597e-11	1.08913e-13	5.1826e-09	3.44298e-10	0.00242343	2.10151e-05	0.00121178	0.0664335		93.4258	3.51861	3.28729
162	2022-03-11 13:11:20	6348706	2.19514e-11	4.53444e-11	5.15786e-09	6.31455e-12	9.89693e-10	1.42245e-11	9.06888e-14	5.13207e-09	3.43423e-10	0.00277169	1.7671e-05	0.00123041	0.0669171		92.6028	3.54607	3.28376
163	2022-03-11 13:12:01	6389804	1.02339e-11	3.31713e-11	5.05636e-09	6.19845e-12	9.75179e-10	6.63157e-12	6.63426e-14	5.03108e-09	3.38387e-10	0.00131812	1.31866e-05	0.00123203	0.0672594		96.3574	3.53339	3.40468
164	2022-03-11 13:12:42	6430901	2.24137e-11	2.52061e-11	4.93021e-09	5.87702e-12	9.63421e-10	1.45241e-11	5.04122e-14	4.90556e-09	3.34307e-10	0.00296074	1.02765e-05	0.00119803	0.0681486		92.2571	3.39603	3.13308
165	2022-03-11 13:13:23	6471999	2.11344e-11	4.17713e-11	5.95218e-09	5.848e-12	1.05821e-09	1.36951e-11	8.35426e-14	5.92242e-09	3.67199e-10	0.00231242	1.41062e-05	0.000987434	0.0620015		93.2598	3.08619	2.87818
166	2022-03-11 13:14:05	6513096	1.62754e-11	1.7763e-11	2.80126e-07	5.5341e-12	8.93593e-10	1.05465e-11	3.5526e-14	2.78725e-07	3.10077e-10	3.78382e-05	1.27459e-07	1.9855e-05	0.00111248		93.8374	3.4461	3.23373
167	2022-03-11 13:14:47	6555734	4.79449e-12	2.08345e-11	3.7392e-07	4.7601e-12	7.78536e-10	3.10683e-12	4.1669e-14	3.7205e-07	2.70152e-10	8.35056e-06	1.11998e-07	1.27942e-05	0.000726117		97.8268	3.40355	3.32959
168	2022-03-11 13:15:26	6594231	3.50449e-12	1.92475e-11	4.02676e-07	1.66291e-11	1.25413e-09	2.27091e-12	3.8495e-14	4.00663e-07	4.35183e-10	5.66788e-06	9.60783e-08	4.1504e-05	0.00108616		99.0398	7.09917	7.03101
169	2022-03-11 13:16:10	6638060	6.82416e-09	3.13694e-11	3.6532e-07	2.58833e-10	4.81819e-09	4.42206e-09	6.27388e-14	3.63493e-07	1.67191e-09	0.0121654	1.726e-07	0.000712071	0.00459957		19.8449	23.6416	4.69166
170	2022-03-11 13:16:43	6671477	1.10987e-08	2.79397e-11	3.64424e-07	2.89503e-10	3.51366e-09	7.19196e-09	5.58794e-14	3.62602e-07	1.21924e-09	0.0198343	1.54107e-07	0.000798405	0.00336248		11.1128	32.1974	3.57804
171	2022-03-11 13:17:13	6701244	1.20796e-08	3.99387e-11	3.56988e-07	2.78459e-10	2.58216e-09	7.82758e-09	7.98774e-14	3.55203e-07	8.9601e-10	0.0220369	2.24878e-07	0.000783943	0.00252253		8.49306	38.3286	3.25528
172	2022-03-11 13:17:43	6731011	1.24632e-08	2.4295e-11	3.57167e-07	2.49296e-10	1.98179e-09	8.07615e-09	4.859e-14	3.55381e-07	6.87681e-10	0.0227253	1.36726e-07	0.000701489	0.00193505		6.84207	42.0284	2.87561
173	2022-03-11 13:18:15	6763368	6.25518e-09	2.29537e-11	3.33428e-07	9.62265e-11	1.4131e-09	4.05336e-09	4.59074e-14	3.31761e-07	4.90346e-10	0.0122177	1.38375e-07	0.000290048	0.00147801		7.76882	28.184	2.18956
174	2022-03-11 13:18:47	6795236	2.16977e-09	1.5439e-11	3.46597e-07	4.72774e-11	1.20902e-09	1.40601e-09	3.0878e-14	3.44864e-07	4.1953e-10	0.004077	8.95367e-08	0.00013709	0.00121651		15.4568	18.3917	2.84278
175	2022-03-11 13:19:26	6834643	7.26817e-10	8.18022e-12	3.84938e-07	2.24212e-11	1.04249e-09	4.70977e-10	1.63604e-14	3.83013e-07	3.61744e-10	0.00122966	4.27151e-08	5.8539e-05	0.000944469		30.1509	11.0286	3.32521
176	2022-03-11 13:20:05	6873141	2.72082e-10	2.96392e-11	1.87139e-07	1.79406e-11	1.9422e-09	1.76309e-10	5.92784e-14	1.86203e-07	6.73943e-10	0.000946864	3.18353e-07	9.63495e-05	0.0036194		66.8125	5.05452	3.37705
177	2022-03-11 13:20:43	6911639	1.11713e-10	3.47787e-11	3.98561e-08	1.7458e-11	2.00819e-09	7.239e-11	6.95574e-14	3.96568e-08	6.96842e-10	0.00182541	1.75398e-06	0.000440227	0.0175718		83.4841	4.77107	3.98308
178	2022-03-11 13:21:23	6951156	5.38251e-11	3.64885e-11	1.26457e-08	1.54499e-11	1.81011e-09	3.48787e-11	7.2977e-14	1.25825e-08	6.28108e-10	0.002772	5.79989e-06	0.00122789	0.0499193		90.429	4.68832	4.2396
179	2022-03-11 13:22:02	6990154	4.35589e-11	4.24163e-11	7.07713e-09	1.34525e-11	1.64754e-09	2.82262e-11	8.48326e-14	7.04174e-09	5.71696e-10	0.00400841	1.20471e-05	0.00191039	0.0811868		91.3831	4.49401	4.10676
180	2022-03-11 13:22:44	7032271	3.82484e-11	2.2575e-11	5.99362e-09	1.17013e-11	1.53008e-09	2.4785e-11	4.515e-14	5.96365e-09	5.30938e-10	0.004156	7.57086e-06	0.0019621	0.089029		91.7925	4.22136	3.87489
181	2022-03-11 13:23:25	7073369	2.50689e-11	1.49578e-11	5.71943e-09	1.08919e-11	1.41778e-09	1.62446e-11	2.99156e-14	5.69083e-09	4.9197e-10	0.00285453	5.25681e-06	0.00191394	0.0864495		94.0525	4.23988	3.98772
182	2022-03-11 13:24:06	7114466	2.28114e-11	4.42694e-11	5.58863e-09	9.63093e-12	1.33295e-09	1.47818e-11	8.85388e-14	5.56069e-09	4.62534e-10	0.00265827	1.59223e-05	0.00173197	0.0831792		94.2196	3.9972	3.76615
183	2022-03-11 13:24:47	7155564	2.70684e-11	2.80932e-11	5.51778e-09	9.23425e-12	1.27129e-09	1.75403e-11	5.61864e-14	5.49019e-09	4.41138e-10	0.00319485	1.0234e-05	0.00168195	0.0803501		92.9093	4.01784	3.73295
184	2022-03-11 13:25:28	7196661	3.15404e-11	3.73485e-11	5.44686e-09	8.45703e-12	1.19906e-09	2.04382e-11	7.4697e-14	5.41963e-09	4.16074e-10	0.00377114	1.37827e-05	0.00156045	0.0767717		91.3752	3.90568	3.56883
185	2022-03-11 13:26:06	7234509	2.58537e-11	3.33658e-11	5.35083e-09	8.09368e-12	1.15203e-09	1.67532e-11	6.67316e-14	5.32408e-09	3.99754e-10	0.00314669	1.25339e-05	0.0015202	0.0750843		92.5461	3.89111	3.60107
186	2022-03-11 13:26:47	7275606	2.95409e-11	3.16356e-11	5.36578e-09	7.69377e-12	1.11976e-09	1.91425e-11	6.32712e-14	5.33895e-09	3.88557e-10	0.00358544	1.18509e-05	0.00144106	0.0727777		91.344	3.80873	3.47904
187	2022-03-11 13:27:28	7316704	1.90597e-11	1.94523e-11	5.33651e-09	7.21217e-12	1.08916e-09	1.23507e-11	3.89046e-14	5.30983e-09	3.77939e-10	0.00232601	7.3269e-06	0.00135827	0.0711772		94.0779	3.67591	3.45822
188	2022-03-11 13:28:09	7357801	2.81757e-11	3.63758e-11	5.33167e-09	6.84775e-12	1.05821e-09	1.82579e-11	7.27516e-14	5.30501e-09	3.67199e-10	0.00344162	1.37137e-05	0.00129081	0.0692174		91.2534	3.59493	3.28049
189	2022-03-11 13:28:50	7398899	1.93177e-11	2.5288e-11	5.25833e-09	7.01975e-12	1.03769e-09	1.25179e-11	5.0576e-14	5.23204e-09	3.60078e-10	0.00239254	9.6666e-06	0.00134169	0.0688218		93.7286	3.75219	3.51687
190	2022-03-11 13:29:31	7439996	1.90489e-11	3.60482e-11	5.20618e-09	6.78862e-12	1.02125e-09	1.23437e-11	7.20964e-14	5.18015e-09	3.54374e-10	0.00238288	1.39178e-05	0.00131051	0.06841		93.7136	3.68924	3.45732
191	2022-03-11 13:30:13	7481094	2.01239e-11	4.53956e-11	5.17155e-09	6.6048e-12	1.01081e-09	1.30403e-11	9.07912e-14	5.14569e-09	3.50751e-10	0.00253421	1.76441e-05	0.00128356	0.068164		93.3149	3.6285	3.38593
192	2022-03-11 13:30:54	7522191	1.59099e-11	3.14821e-11	5.16534e-09	6.40162e-12	9.86579e-10	1.03096e-11	6.29642e-14	5.13951e-09	3.42343e-10	0.00200595	1.2251e-05	0.00124557	0.06661		94.5137	3.60442	3.40667
193	2022-03-11 13:31:35	7563289	1.50607e-11	2.49707e-11	5.16238e-09	6.22425e-12	9.56936e-10	9.75933e-12	4.99414e-14	5.13657e-09	3.32057e-10	0.00189997	9.72272e-06	0.00121175	0.0646457		94.6388	3.61292	3.41922
194	2022-03-11 13:32:16	7604386	1.97262e-11	1.25518e-11	5.12484e-09	5.92755e-12	9.67979e-10	1.27826e-11	2.51036e-14	5.09922e-09	3.35889e-10	0.00250677	4.92303e-06	0.00116244	0.0658707		93.1522	3.4089	3.17547
195	2022-03-11 13:32:57	7645484	-7.10573e-12	3.4277e-11	5.54909e-09	6.44247e-12	9.54186e-10	-4.60451e-12	6.8554e-14	5.52134e-09	3.31103e-10	-0.000833948	1.24162e-05	0.00116683	0.0599677		102.75	3.74501	3.84801
196	2022-03-11 13:33:38	7686581	1.67377e-11	3.12261e-11	4.79239e-09	5.9727e-12	9.44107e-10	1.0846e-11	6.24522e-14	4.76843e-09	3.27605e-10	0.00227455	1.3097e-05	0.00125255	0.068703		93.9962	3.51736	3.30618
197	2022-03-11 13:34:19	7727679	1.72644e-11	3.59253e-11	5.20665e-09	5.6373e-12	9.97371e-10	1.11873e-11	7.18506e-14	5.18062e-09	3.46088e-10	0.00215946	1.38691e-05	0.00108815	0.0668044		94.109	3.15431	2.96849
198	2022-03-11 13:35:00	7768776	2.66384e-11	2.48069e-11	2.62748e-07	5.5298e-12	8.71164e-10	1.72617e-11	4.96138e-14	2.61434e-07	3.02294e-10	6.60269e-05	1.89775e-07	2.11518e-05	0.00115629		90.0774	3.52887	3.17872
199	2022-03-11 13:35:43	7811414	8.05173e-12	2.0814e-11	3.76787e-07	4.76117e-12	7.9545e-10	5.21752e-12	4.1628e-14	3.74903e-07	2.76021e-10	1.3917e-05	1.11037e-07	1.26997e-05	0.000736247		96.4749	3.33433	3.21679
200	2022-03-11 13:36:21	7849911	9.02998e-13	1.42411e-11	4.07155e-07	5.24815e-12	7.96407e-10	5.85143e-13	2.84822e-14	4.05119e-07	2.76353e-10	1.44437e-06	7.03057e-08	1.29546e-05	0.000682153		99.5937	3.6588	3.64394
201	2022-03-11 13:37:05	7893740	5.94591e-09	5.05453e-11	3.64066e-07	2.42395e-10	5.18496e-09	3.85295e-09	1.01091e-13	3.62246e-07	1.79918e-09	0.0106363	2.79066e-07	0.000669145	0.00496674		22.8637	21.2248	4.85277
202	2022-03-11 13:37:37	7925606	1.05017e-08	2.25442e-11	3.6532e-07	2.87236e-10	3.96191e-09	6.8051e-09	4.50884e-14	3.63493e-07	1.37478e-09	0.0187214	1.24042e-07	0.00079021	0.00378214		12.528	29.4707	3.6921
203	2022-03-11 13:38:11	7959023	1.19942e-08	3.85361e-11	3.58063e-07	2.75847e-10	2.79512e-09	7.77224e-09	7.70722e-14	3.56273e-07	9.69907e-10	0.0218154	2.16329e-07	0.000774258	0.00272237		8.91634	36.2556	3.23268
204	2022-03-11 13:38:40	7988789	1.23544e-08	3.71232e-11	3.56362e-07	2.53119e-10	2.16452e-09	8.00565e-09	7.42464e-14	3.5458e-07	7.51088e-10	0.0225778	2.09392e-07	0.000713855	0.00211825		7.28138	40.2607	2.93153
205	2022-03-11 13:39:13	8021146	6.88294e-09	1.47018e-11	3.33608e-07	1.02753e-10	1.50164e-09	4.46015e-09	2.94036e-14	3.3194e-07	5.21069e-10	0.0134366	8.85811e-08	0.000309553	0.00156977		7.532	28.2831	2.13028
206	2022-03-11 13:39:45	8053014	2.28601e-09	3.50756e-11	3.42566e-07	4.79977e-11	1.26696e-09	1.48133e-09	7.01512e-14	3.40853e-07	4.39635e-10	0.00434596	2.05811e-07	0.000140816	0.00128981		15.3129	17.9196	2.744
207	2022-03-11 13:40:16	8084881	9.40268e-10	3.93347e-11	3.77324e-07	2.65406e-11	1.0822e-09	6.09294e-10	7.86694e-14	3.75437e-07	3.75523e-10	0.00162289	2.09541e-07	7.06925e-05	0.00100023		26.0239	12.3824	3.22237
208	2022-03-11 13:40:53	8121038	3.9031e-10	1.78551e-11	2.89263e-07	1.72849e-11	1.74448e-09	2.52921e-10	3.57102e-14	2.87817e-07	6.05335e-10	0.000878757	1.24073e-07	6.00552e-05	0.00210319		55.8518	5.40204	3.01714
209	2022-03-11 13:41:31	8159536	1.21259e-10	3.75532e-11	6.12816e-08	1.77482e-11	2.03134e-09	7.85758e-11	7.51064e-14	6.09752e-08	7.04875e-10	0.00128865	1.23175e-06	0.000291072	0.01156		82.492	4.79392	3.9546
210	2022-03-11 13:42:11	8199054	7.41103e-11	1.59509e-11	1.65309e-08	1.61088e-11	1.86349e-09	4.80235e-11	3.19018e-14	1.64482e-08	6.46631e-10	0.00291967	1.93953e-06	0.000979363	0.0393131		87.6057	4.7457	4.1575
211	2022-03-11 13:42:50	8238051	4.66226e-11	3.48913e-11	7.96511e-09	1.44071e-11	1.68365e-09	3.02114e-11	6.97826e-14	7.92528e-09	5.84227e-10	0.00381203	8.80506e-06	0.00181787	0.0737168		91.029	4.69967	4.27807
212	2022-03-11 13:43:29	8277049	4.14626e-11	4.0338e-11	6.13085e-09	1.24001e-11	1.53667e-09	2.68678e-11	8.0676e-14	6.1002e-09	5.33224e-10	0.00440441	1.32251e-05	0.00203274	0.087411		91.2174	4.44364	4.05337
213	2022-03-11 13:44:11	8319166	3.03042e-11	4.61123e-11	5.68944e-09	1.15369e-11	1.41778e-09	1.96371e-11	9.22246e-14	5.66099e-09	4.9197e-10	0.00346885	1.62912e-05	0.00203796	0.0869052		92.916	4.47917	4.16187
214	2022-03-11 13:44:52	8360264	1.99304e-11	2.89635e-11	5.52014e-09	1.01168e-11	1.32659e-09	1.29149e-11	5.7927e-14	5.49254e-09	4.60327e-10	0.00235135	1.05465e-05	0.00184192	0.0838095		94.8998	4.20991	3.9952
215	2022-03-11 13:45:33	8401361	2.61332e-11	2.97109e-11	5.44339e-09	9.2923e-12	1.23865e-09	1.69343e-11	5.94218e-14	5.41617e-09	4.29812e-10	0.00312662	1.09712e-05	0.00171566	0.0793571		92.978	4.14413	3.85313
216	2022-03-11 13:46:14	8442459	4.41071e-11	3.3499e-11	5.40305e-09	8.69353e-12	1.19966e-09	2.85814e-11	6.6998e-14	5.37603e-09	4.16282e-10	0.00531645	1.24623e-05	0.00161709	0.0774329		88.3555	4.00867	3.54188
217	2022-03-11 13:46:55	8483556	2.77672e-11	3.50449e-11	5.33236e-09	8.07755e-12	1.14866e-09	1.79931e-11	7.00898e-14	5.3057e-09	3.98585e-10	0.00339129	1.32103e-05	0.00152243	0.075124		92.0172	3.89458	3.58368
218	2022-03-11 13:47:36	8524654	3.06912e-11	3.16253e-11	5.29432e-09	7.70775e-12	1.11016e-09	1.98879e-11	6.32506e-14	5.26785e-09	3.85226e-10	0.00377534	1.20069e-05	0.00146317	0.0731277		90.9699	3.8471	3.4997
219	2022-03-11 13:48:17	8565751	1.88877e-11	4.15972e-11	5.24018e-09	7.40352e-12	1.07764e-09	1.22392e-11	8.31944e-14	5.21398e-09	3.73941e-10	0.00234739	1.5956e-05	0.00141994	0.0717189		94.0775	3.80809	3.58255
220	2022-03-11 13:48:58	8606849	3.56791e-11	3.85668e-11	5.22067e-09	7.2971e-12	1.05376e-09	2.31201e-11	7.71336e-14	5.19457e-09	3.65655e-10	0.00445082	1.48489e-05	0.00140476	0.0703918		89.1599	3.83729	3.42132
221	2022-03-11 13:49:39	8647946	2.24997e-11	2.40083e-11	5.24626e-09	6.923e-12	1.04189e-09	1.45798e-11	4.80166e-14	5.22003e-09	3.61536e-10	0.00279305	9.19853e-06	0.00132624	0.0692594		92.7928	3.68804	3.42223
222	2022-03-11 13:50:21	8689044	8.10548e-12	3.99387e-11	5.22204e-09	6.58437e-12	1.00098e-09	5.25235e-12	7.98774e-14	5.19593e-09	3.4734e-10	0.00101086	1.53731e-05	0.00126722	0.0668485		97.1693	3.65201	3.54863
223	2022-03-11 13:51:02	8730141	2.16397e-11	3.55977e-11	5.19731e-09	6.61877e-12	9.89693e-10	1.40225e-11	7.11954e-14	5.17132e-09	3.43423e-10	0.00271159	1.37673e-05	0.0012799	0.0664092		92.7114	3.71078	3.44031
224	2022-03-11 13:51:43	8771239	1.94359e-11	4.51909e-11	5.17307e-09	6.3683e-12	9.885e-10	1.25945e-11	9.03818e-14	5.1472e-09	3.43009e-10	0.00244685	1.75594e-05	0.00123723	0.06664		93.3892	3.57934	3.34272
225	2022-03-11 13:52:24	8812336	1.29859e-11	3.00692e-11	5.10236e-09	6.1189e-12	9.627e-10	8.41486e-12	6.01384e-14	5.07685e-09	3.34057e-10	0.0016575	1.18456e-05	0.00120526	0.0658001		95.3661	3.53331	3.36958
226	2022-03-11 13:53:05	8853434	1.69097e-11	3.12568e-11	5.08471e-09	6.2694e-12	9.58743e-10	1.09575e-11	6.25136e-14	5.05929e-09	3.32684e-10	0.00216582	1.23562e-05	0.00123919	0.0657571		94.0319	3.63143	3.4147
227	2022-03-11 13:53:46	8894531	3.93019e-11	3.35091e-11	5.11666e-09	5.04175e-12	9.27307e-10	2.54676e-11	6.70182e-14	5.09108e-09	3.21776e-10	0.00500241	1.31639e-05	0.000990311	0.0632038		86.6962	3.03788	2.63372
228	2022-03-11 13:54:26	8934589	3.76679e-11	4.18328e-11	4.67154e-09	6.30917e-12	9.30186e-10	2.44088e-11	8.36656e-14	4.64818e-09	3.22775e-10	0.00525126	1.79996e-05	0.00135734	0.069441		87.2968	3.76132	3.28351
229	2022-03-11 13:55:07	8975686	-1.32439e-11	4.75047e-11	5.13097e-09	5.9125e-12	9.2935e-10	-8.58205e-12	9.50094e-14	5.10532e-09	3.22484e-10	-0.001681	1.86099e-05	0.00115811	0.0631664		105.41	3.53614	3.72746
230	2022-03-11 13:55:48	9016784	1.41039e-11	2.74585e-11	1.67431e-07	6.0544e-12	9.12786e-10	9.13933e-12	5.4917e-14	1.66594e-07	3.16737e-10	5.48599e-05	3.29646e-07	3.63423e-05	0.00190125		94.7351	3.6816	3.48777
231	2022-03-11 13:56:31	9059422	1.68774e-12	2.23907e-11	3.57616e-07	5.15355e-12	7.99414e-10	1.09366e-12	4.47814e-14	3.55828e-07	2.77397e-10	3.07355e-06	1.25851e-07	1.44833e-05	0.000779581		99.2456	3.58198	3.55496
232	2022-03-11 13:57:09	9097919	4.25699e-12	1.32992e-11	4.03393e-07	4.49887e-12	7.04632e-10	2.75853e-12	2.65984e-14	4.01376e-07	2.44507e-10	6.87268e-06	6.6268e-08	1.12086e-05	0.000609173		97.8703	3.54896	3.47338
233	2022-03-11 13:57:48	9136416	1.28001e-09	1.86742e-11	3.99092e-07	1.70233e-10	4.48621e-09	8.29446e-10	3.73484e-14	3.97097e-07	1.55671e-09	0.00208878	9.40537e-08	0.000428694	0.00392024		53.3509	17.9455	9.57411
234	2022-03-11 13:58:32	9180245	1.01251e-08	1.92988e-11	3.6747e-07	2.84765e-10	4.03965e-09	6.56106e-09	3.85976e-14	3.65633e-07	1.40176e-09	0.0179444	1.05564e-07	0.000778828	0.00383379		13.0608	28.8907	3.77336
235	2022-03-11 13:59:05	9213662	1.19956e-08	2.80932e-11	3.59855e-07	2.75479e-10	2.82536e-09	7.77315e-09	5.61864e-14	3.58056e-07	9.804e-10	0.0217093	1.56921e-07	0.000769375	0.00273812		8.96733	35.9771	3.22618
236	2022-03-11 13:59:35	9243429	1.24262e-08	2.27694e-11	3.55913e-07	2.63637e-10	2.16488e-09	8.05218e-09	4.55388e-14	3.54133e-07	7.51213e-10	0.0227377	1.28592e-07	0.000744457	0.00212127		7.35512	41.2406	3.03329
237	2022-03-11 14:00:05	9273196	1.02971e-08	3.56796e-11	3.46059e-07	1.28367e-10	1.53811e-09	6.67252e-09	7.13592e-14	3.44329e-07	5.33724e-10	0.0193783	2.07242e-07	0.000372804	0.00155004		5.59248	32.4762	1.81623
238	2022-03-11 14:00:37	9305552	2.95591e-09	3.10316e-11	3.35758e-07	5.66525e-11	1.27032e-09	1.91543e-09	6.20632e-14	3.34079e-07	4.40801e-10	0.00573346	1.85774e-07	0.000169578	0.00131945		12.6377	20.446	2.58391
239	2022-03-11 14:01:09	9337419	1.19712e-09	2.16228e-11	3.7168e-07	2.94818e-11	1.0858e-09	7.75734e-10	4.32456e-14	3.69822e-07	3.76773e-10	0.00209759	1.16936e-07	7.9719e-05	0.0010188		21.9288	13.5306	2.9671
240	2022-03-11 14:01:48	9376827	4.40125e-10	1.5654e-11	3.29576e-07	1.75633e-11	1.56259e-09	2.85201e-10	3.1308e-14	3.27928e-07	5.42219e-10	0.000869706	9.54721e-08	5.35584e-05	0.00165347		50.3038	6.08383	3.0604
241	2022-03-11 14:02:27	9415324	1.68634e-10	2.86973e-11	7.15859e-08	1.79084e-11	2.00483e-09	1.09275e-10	5.73946e-14	7.1228e-08	6.95676e-10	0.00153416	8.05787e-07	0.000251424	0.00976689		76.9972	4.89601	3.76979
242	2022-03-11 14:03:06	9454841	6.72196e-11	2.52266e-11	1.83213e-08	1.62475e-11	1.86109e-09	4.35583e-11	5.04532e-14	1.82297e-08	6.45798e-10	0.00238941	2.76764e-06	0.000891266	0.0354256		88.6191	4.79034	4.24516
243	2022-03-11 14:03:45	9493839	4.39889e-11	2.9158e-11	8.28482e-09	1.452e-11	1.67669e-09	2.85048e-11	5.8316e-14	8.2434e-09	5.81811e-10	0.0034579	7.07427e-06	0.00176141	0.0705791		91.4646	4.75357	4.34783
244	2022-03-11 14:04:24	9532836	4.50424e-12	5.91556e-11	6.16616e-09	1.25151e-11	1.51976e-09	2.91875e-12	1.18311e-13	6.13533e-09	5.27357e-10	0.000475728	1.92836e-05	0.00203984	0.0859541		98.9545	4.53031	4.48295
245	2022-03-11 14:05:06	9574954	2.94979e-11	3.6171e-11	5.71892e-09	1.18572e-11	1.38922e-09	1.91146e-11	7.2342e-14	5.69033e-09	4.82059e-10	0.00335915	1.27132e-05	0.00208375	0.0847156		92.9735	4.68807	4.35866
246	2022-03-11 14:05:48	9616051	3.29056e-11	3.33147e-11	5.55879e-09	1.01308e-11	1.32624e-09	2.13228e-11	6.66294e-14	5.531e-09	4.60205e-10	0.00385515	1.20465e-05	0.00183164	0.0832048		91.8487	4.21648	3.87278
247	2022-03-11 14:06:29	9657149	2.64019e-11	4.42285e-11	5.46538e-09	9.54278e-12	1.23937e-09	1.71084e-11	8.8457e-14	5.43805e-09	4.30061e-10	0.00314606	1.62663e-05	0.00175482	0.0790837		92.9224	4.24845	3.94777
248	2022-03-11 14:07:10	9698246	2.60042e-11	3.45432e-11	5.36653e-09	9.07515e-12	1.18729e-09	1.68507e-11	6.90864e-14	5.3397e-09	4.1199e-10	0.00315574	1.29383e-05	0.00169956	0.077156		92.7354	4.21895	3.91246
249	2022-03-11 14:07:51	9739344	2.84122e-11	2.87485e-11	5.31218e-09	8.17968e-12	1.14579e-09	1.84111e-11	5.7497e-14	5.28562e-09	3.97589e-10	0.00348324	1.0878e-05	0.00154753	0.0752209		91.8323	3.95148	3.62873
250	2022-03-11 14:08:32	9780441	2.71544e-11	3.84747e-11	5.22989e-09	7.8948e-12	1.09719e-09	1.75961e-11	7.69494e-14	5.20374e-09	3.80725e-10	0.00338142	1.47873e-05	0.00151714	0.0731637		91.8496	3.98133	3.65683
251	2022-03-11 14:09:13	9821539	1.83179e-11	3.28539e-11	5.1922e-09	7.50565e-12	1.06876e-09	1.187e-11	6.57078e-14	5.16624e-09	3.7086e-10	0.00229761	1.27187e-05	0.00145283	0.0717852		94.2052	3.88958	3.66418
252	2022-03-11 14:09:54	9862636	3.01322e-11	3.25775e-11	5.20565e-09	6.92085e-12	1.04861e-09	1.95257e-11	6.5155e-14	5.17962e-09	3.63868e-10	0.00376971	1.25791e-05	0.00133617	0.0702499		90.6313	3.66401	3.32074
253	2022-03-11 14:10:35	9903734	2.60149e-11	3.4789e-11	5.17972e-09	6.97782e-12	1.02269e-09	1.68577e-11	6.9578e-14	5.15382e-09	3.54873e-10	0.0032709	1.35003e-05	0.00135391	0.0688564		91.6259	3.78306	3.46626
254	2022-03-11 14:11:16	9944831	2.60472e-11	3.34272e-11	5.1682e-09	6.7166e-12	1.01369e-09	1.68786e-11	6.68544e-14	5.14236e-09	3.5175e-10	0.00328227	1.30007e-05	0.00130613	0.0684025		91.5397	3.6778	3.36665
255	2022-03-11 14:11:57	9985929	9.06223e-12	3.20144e-11	5.13017e-09	6.12212e-12	9.85493e-10	5.87233e-12	6.40288e-14	5.10452e-09	3.41966e-10	0.00115042	1.25436e-05	0.00119935	0.0669928		96.7912	3.45615	3.34525
256	2022-03-11 14:12:39	10027026	1.50499e-13	3.06323e-11	5.15033e-09	6.17695e-12	9.639e-10	9.75234e-14	6.12646e-14	5.12458e-09	3.34473e-10	1.90305e-05	1.19551e-05	0.00120536	0.0652685		99.9438	3.56135	3.55935
257	2022-03-11 14:13:20	10068124	1.61464e-11	3.80549e-11	5.15477e-09	5.934e-12	9.65936e-10	1.04629e-11	7.61098e-14	5.129e-09	3.3518e-10	0.00203994	1.48391e-05	0.00115695	0.06535		94.3144	3.41895	3.22457
258	2022-03-11 14:14:01	10109221	6.79398e-12	3.36832e-11	5.1415e-09	5.9641e-12	9.4375e-10	4.4025e-12	6.73664e-14	5.11579e-09	3.27481e-10	0.00086057	1.31683e-05	0.00116582	0.0640138		97.4719	3.5137	3.42487
259	2022-03-11 14:14:42	10150319	1.69527e-11	3.08268e-11	5.14752e-09	4.13875e-12	9.36429e-10	1.09853e-11	6.16536e-14	5.12178e-09	3.24941e-10	0.00214483	1.20375e-05	0.000808068	0.0634429		93.8154	2.48365	2.33004
260	2022-03-11 14:15:23	10191416	2.95624e-11	2.69364e-11	4.66937e-09	6.12212e-12	9.24914e-10	1.91564e-11	5.38728e-14	4.64602e-09	3.20945e-10	0.00412319	1.15955e-05	0.00131771	0.0690795		89.6885	3.67426	3.29539
261	2022-03-11 14:16:04	10232514	1.94574e-11	3.09702e-11	5.06981e-09	5.54377e-12	9.14357e-10	1.26084e-11	6.19404e-14	5.04446e-09	3.17282e-10	0.00249945	1.22789e-05	0.00109898	0.0628971		92.8695	3.37591	3.13519
262	2022-03-11 14:16:45	10273611	2.64987e-11	2.56361e-11	1.41452e-07	6.18125e-12	9.35221e-10	1.71712e-11	5.12722e-14	1.40745e-07	3.24522e-10	0.000122002	3.64292e-07	4.39182e-05	0.00230575		90.7502	3.6691	3.32972
263	2022-03-11 14:17:28	10316249	1.15024e-11	2.3138e-11	3.51524e-07	5.01487e-12	7.9965e-10	7.45356e-12	4.6276e-14	3.49766e-07	2.77479e-10	2.13101e-05	1.32305e-07	1.43378e-05	0.000793325		95.0714	3.48794	3.31604
264	2022-03-11 14:18:06	10354746	4.24624e-12	3.63656e-11	3.99451e-07	4.47522e-12	7.2035e-10	2.75156e-12	7.27312e-14	3.97454e-07	2.49961e-10	6.92298e-06	1.82993e-07	1.12597e-05	0.000628907		97.9193	3.45597	3.38407
265	2022-03-11 14:18:45	10393244	5.36574e-10	2.38342e-11	3.98376e-07	1.53552e-10	4.48849e-09	3.477e-10	4.76684e-14	3.96384e-07	1.55751e-09	0.000877179	1.20258e-07	0.000387382	0.00392928		72.8366	16.4697	11.996
266	2022-03-11 14:19:29	10437072	9.73429e-09	2.57078e-11	3.66484e-07	2.80284e-10	4.19682e-09	6.30782e-09	5.14156e-14	3.64652e-07	1.4563e-09	0.0172982	1.40999e-07	0.000768635	0.00399367		13.7838	27.7933	3.83096
267	2022-03-11 14:20:02	10470489	1.18135e-08	2.45713e-11	3.59676e-07	2.74273e-10	2.87239e-09	7.65515e-09	4.91426e-14	3.57878e-07	9.96719e-10	0.0213904	1.37317e-07	0.000766388	0.00278508		9.16795	35.4974	3.25438
268	2022-03-11 14:20:32	10500256	1.23208e-08	2.37523e-11	3.56003e-07	2.63488e-10	2.19188e-09	7.98388e-09	4.75046e-14	3.54223e-07	7.60582e-10	0.0225391	1.34109e-07	0.000743848	0.00214719		7.46206	40.9268	3.05398
269	2022-03-11 14:21:02	10530022	1.01661e-08	3.12261e-11	3.67738e-07	1.33305e-10	1.55659e-09	6.58763e-09	6.24522e-14	3.65899e-07	5.40137e-10	0.0180039	1.70681e-07	0.000364322	0.00147619		5.77031	33.045	1.9068
270	2022-03-11 14:21:34	10562379	3.09318e-09	2.34759e-11	3.33249e-07	5.72437e-11	1.25569e-09	2.00438e-09	4.69518e-14	3.31583e-07	4.35724e-10	0.00604489	1.41599e-07	0.000172638	0.00131407		12.0697	20.8061	2.51123
271	2022-03-11 14:22:06	10594246	1.19164e-09	2.9117e-11	3.67112e-07	2.97452e-11	1.07764e-09	7.72183e-10	5.8234e-14	3.65276e-07	3.73941e-10	0.00211397	1.59424e-07	8.1432e-05	0.00102372		21.9172	13.7236	3.00782
272	2022-03-11 14:22:45	10633653	4.43275e-10	1.28488e-11	3.54033e-07	1.69226e-11	1.44621e-09	2.87242e-10	2.56976e-14	3.52263e-07	5.01835e-10	0.00081542	7.29501e-08	4.80397e-05	0.0014246		48.2535	6.31787	3.04859
273	2022-03-11 14:23:24	10672151	1.52714e-10	2.95164e-11	8.25957e-08	1.71527e-11	1.98875e-09	9.89587e-11	5.90328e-14	8.21827e-08	6.90096e-10	0.00120413	7.18312e-07	0.000208714	0.0083971		78.5427	4.7353	3.71923
274	2022-03-11 14:24:02	10710649	6.85526e-11	2.19197e-11	2.01527e-08	1.58293e-11	1.8305e-09	4.44221e-11	4.38394e-14	2.00519e-08	6.35183e-10	0.00221535	2.18629e-06	0.000789415	0.0316769		88.2439	4.74723	4.18914
275	2022-03-11 14:24:42	10750166	4.56121e-11	2.34861e-11	8.69233e-09	1.45286e-11	1.66554e-09	2.95566e-11	4.69722e-14	8.64887e-09	5.77942e-10	0.0034174	5.43102e-06	0.00167983	0.0668229		91.1263	4.78665	4.3619
276	2022-03-11 14:25:21	10789164	5.23309e-11	3.29972e-11	6.26848e-09	1.25538e-11	1.51364e-09	3.39104e-11	6.59944e-14	6.23714e-09	5.25233e-10	0.00543686	1.05809e-05	0.00201275	0.0842106		89.0298	4.56165	4.06122
277	2022-03-11 14:26:03	10831282	4.33439e-11	2.72947e-11	5.72168e-09	1.1324e-11	1.40709e-09	2.80868e-11	5.45894e-14	5.69307e-09	4.8826e-10	0.00493351	9.58874e-06	0.00198908	0.0857639		90.0952	4.43242	3.99339
278	2022-03-11 14:26:44	10872379	1.21044e-11	3.45842e-11	5.53291e-09	1.04285e-11	1.32011e-09	7.84365e-12	6.91684e-14	5.50525e-09	4.58078e-10	0.00142476	1.25641e-05	0.00189428	0.0832076		96.8289	4.35424	4.21616
279	2022-03-11 14:27:25	10913476	9.67498e-12	3.94268e-11	5.43373e-09	9.36648e-12	1.24729e-09	6.26939e-12	7.88536e-14	5.40656e-09	4.3281e-10	0.00115959	1.45848e-05	0.00173243	0.0800527		97.2986	4.14793	4.03588
280	2022-03-11 14:28:06	10954574	2.69502e-11	3.45739e-11	5.34738e-09	8.55378e-12	1.17566e-09	1.74637e-11	6.91478e-14	5.32064e-09	4.07954e-10	0.00328226	1.29961e-05	0.00160766	0.0766738		92.408	4.02407	3.71856
281	2022-03-11 14:28:47	10995671	2.10699e-11	2.7479e-11	5.29534e-09	8.43015e-12	1.12827e-09	1.36533e-11	5.4958e-14	5.26886e-09	3.9151e-10	0.00259132	1.04307e-05	0.00159999	0.0743063		93.7332	4.12813	3.86942
282	2022-03-11 14:29:28	11036769	1.75869e-11	3.29153e-11	5.29239e-09	7.76042e-12	1.10979e-09	1.13963e-11	6.58306e-14	5.26593e-09	3.85097e-10	0.00216416	1.25012e-05	0.0014737	0.07313		94.6177	3.87359	3.6651
283	2022-03-11 14:30:09	11077866	2.18762e-11	3.71642e-11	5.25508e-09	7.3057e-12	1.04369e-09	1.41758e-11	7.43284e-14	5.2288e-09	3.6216e-10	0.00271109	1.42152e-05	0.0013972	0.0692626		93.003	3.87729	3.60599
284	2022-03-11 14:30:50	11118964	2.62192e-11	4.37472e-11	5.19622e-09	7.3057e-12	1.03049e-09	1.699e-11	8.74944e-14	5.17024e-09	3.5758e-10	0.00328612	1.69227e-05	0.00141303	0.0691612		91.6359	3.92485	3.59657
285	2022-03-11 14:31:32	11160061	2.18332e-11	3.80447e-11	5.15393e-09	7.15197e-12	1.00829e-09	1.41479e-11	7.60894e-14	5.12816e-09	3.49877e-10	0.00275887	1.48376e-05	0.00139465	0.0682265		92.7918	3.92688	3.64383
286	2022-03-11 14:32:13	11201159	1.65657e-11	2.27797e-11	5.14622e-09	6.5876e-12	9.84421e-10	1.07346e-11	4.55594e-14	5.12049e-09	3.41594e-10	0.0020964	8.89747e-06	0.00128652	0.0667112		94.2944	3.71326	3.5014
287	2022-03-11 14:32:54	11242256	1.91027e-11	2.90966e-11	5.12134e-09	6.36185e-12	9.63057e-10	1.23785e-11	5.81932e-14	5.09573e-09	3.34181e-10	0.0024292	1.142e-05	0.00124847	0.0655805		93.3398	3.66717	3.42293
288	2022-03-11 14:33:35	11283354	1.21259e-11	3.86999e-11	5.10385e-09	6.81872e-12	9.44821e-10	7.85758e-12	7.73998e-14	5.07833e-09	3.27853e-10	0.00154728	1.52412e-05	0.00134271	0.0645592		95.6015	3.9926	3.81699
289	2022-03-11 14:34:16	11324451	5.93399e-12	2.67623e-11	5.0756e-09	6.2565e-12	9.37507e-10	3.84523e-12	5.35246e-14	5.05022e-09	3.25315e-10	0.000761397	1.05985e-05	0.00123886	0.064416		97.7746	3.70337	3.62095
290	2022-03-11 14:34:57	11365549	1.84792e-11	3.26491e-11	5.08477e-09	6.0888e-12	9.22271e-10	1.19745e-11	6.52982e-14	5.05935e-09	3.20028e-10	0.00236681	1.29065e-05	0.00120348	0.0632548		93.2769	3.66496	3.41856
291	2022-03-11 14:35:38	11406646	2.29619e-11	3.77272e-11	5.09475e-09	6.03505e-12	9.15914e-10	1.48793e-11	7.54544e-14	5.06928e-09	3.17822e-10	0.00293519	1.48846e-05	0.00119052	0.0626958		91.7274	3.65796	3.35536
292	2022-03-11 14:36:19	11447744	1.45124e-11	1.78347e-11	4.66006e-09	6.21565e-12	9.06671e-10	9.40404e-12	3.56694e-14	4.63676e-09	3.14615e-10	0.00202815	7.69274e-06	0.00134052	0.0678523		94.5624	3.80067	3.59401
293	2022-03-11 14:37:00	11488841	1.86189e-11	3.9908e-11	5.00837e-09	5.59752e-12	8.81721e-10	1.2065e-11	7.9816e-14	4.98333e-09	3.05957e-10	0.00242108	1.60166e-05	0.00112325	0.0613962		92.9312	3.52898	3.27952
294	2022-03-11 14:37:41	11529939	2.85842e-11	2.4039e-11	1.06783e-07	5.88455e-12	9.52621e-10	1.85226e-11	4.8078e-14	1.06249e-07	3.30559e-10	0.000174331	4.52503e-07	5.53845e-05	0.00311117		90.2364	3.43747	3.10185
295	2022-03-11 14:38:24	11572577	3.54749e-12	1.3678e-11	3.27784e-07	5.22772e-12	8.00971e-10	2.29877e-12	2.7356e-14	3.26145e-07	2.77937e-10	7.04832e-06	8.38768e-08	1.60288e-05	0.000852188		98.431	3.62508	3.5682
296	2022-03-11 14:39:03	11611074	7.03048e-12	2.4684e-11	3.83058e-07	4.77515e-12	7.00554e-10	4.55575e-12	4.9368e-14	3.81143e-07	2.43092e-10	1.19529e-05	1.29526e-07	1.25285e-05	0.000637798		96.5197	3.77942	3.64789
297	2022-03-11 14:39:41	11649571	8.01841e-11	3.40723e-11	3.89238e-07	1.19308e-10	3.86532e-09	5.19593e-11	6.81446e-14	3.87292e-07	1.34127e-09	0.000134161	1.75952e-07	0.000308057	0.00346319		93.8286	15.1028	14.1707
298	2022-03-11 14:40:25	11693400	9.03234e-09	3.4881e-11	3.63259e-07	2.71799e-10	4.22406e-09	5.85296e-09	6.9762e-14	3.61443e-07	1.46575e-09	0.0161933	1.9301e-07	0.000751984	0.00405527		14.6509	27.0525	3.96343
299	2022-03-11 14:40:58	11726817	1.16053e-08	3.13591e-11	3.59049e-07	2.72323e-10	2.97473e-09	7.52023e-09	6.27182e-14	3.57254e-07	1.03223e-09	0.0210501	1.75556e-07	0.000762268	0.00288935		9.48969	34.5382	3.27756
300	2022-03-11 14:41:28	11756584	1.20903e-08	3.40518e-11	3.53137e-07	2.60295e-10	2.23326e-09	7.83451e-09	6.81036e-14	3.51371e-07	7.74941e-10	0.022297	1.93822e-07	0.000740798	0.00220548		7.63706	40.1814	3.06868
301	2022-03-11 14:41:58	11786351	1.10718e-08	1.8838e-11	3.54212e-07	1.59735e-10	1.63937e-09	7.17453e-09	3.7676e-14	3.52441e-07	5.68861e-10	0.0203567	1.069e-07	0.000453225	0.00161406		5.83018	35.9614	2.09661
302	2022-03-11 14:42:30	11818707	2.01324e-09	2.5503e-11	1.51664e-07	5.01853e-11	1.17998e-09	1.30458e-09	5.1006e-14	1.50906e-07	4.09453e-10	0.008645	3.37999e-07	0.000332561	0.0027133		16.3472	19.6853	3.218
303	2022-03-11 14:43:02	11850574	1.19398e-09	3.04173e-11	1.57308e-07	3.56631e-11	1.15179e-09	7.73699e-10	6.08346e-14	1.56521e-07	3.99671e-10	0.00494309	3.88666e-07	0.000227848	0.00255346		23.3375	15.1417	3.5337
304	2022-03-11 14:43:41	11889982	7.09133e-10	1.89916e-11	1.65102e-07	2.41316e-11	1.08184e-09	4.59518e-10	3.79832e-14	1.64276e-07	3.75398e-10	0.00279722	2.31215e-07	0.000146896	0.00228516		31.5549	11.3909	3.59439
305	2022-03-11 14:44:20	11928479	4.32805e-10	4.0553e-11	1.72716e-07	1.68173e-11	1.05136e-09	2.80458e-10	8.1106e-14	1.71852e-07	3.64822e-10	0.00163197	4.71951e-07	9.7859e-05	0.00212288		41.538	8.4395	3.5056
306	2022-03-11 14:44:58	11966976	2.69319e-10	2.86256e-11	1.80152e-07	1.32268e-11	9.92336e-10	1.74519e-10	5.72512e-14	1.79251e-07	3.44341e-10	0.000973598	3.19391e-07	7.37892e-05	0.00192099		51.5151	7.13321	3.67468
307	2022-03-11 14:45:37	12005474	1.80685e-10	3.12466e-11	1.86512e-07	1.05661e-11	9.78057e-10	1.17084e-10	6.24932e-14	1.85579e-07	3.39386e-10	0.00063091	3.36746e-07	5.69357e-05	0.00182879		60.6274	5.86061	3.55313
308	2022-03-11 14:46:15	12043971	1.46178e-10	3.31406e-11	1.91707e-07	1.23313e-11	1.23157e-09	9.47233e-11	6.62812e-14	1.90748e-07	4.27355e-10	0.000496588	3.4748e-07	6.46469e-05	0.00224041		70.4696	5.45532	3.84434
309	2022-03-11 14:46:54	12082469	2.9585e-10	3.28539e-11	1.96008e-07	1.61067e-11	1.27776e-09	1.91711e-10	6.57078e-14	1.95028e-07	4.43383e-10	0.000982991	3.36915e-07	8.25866e-05	0.00227343		55.3685	6.77233	3.74974
310	2022-03-11 14:47:32	12120966	3.46826e-10	2.84311e-11	2.02816e-07	1.6369e-11	1.15059e-09	2.24743e-10	5.68622e-14	2.01802e-07	3.99255e-10	0.00111368	2.81772e-07	8.11142e-05	0.00197845		49.011	7.57737	3.71374
311	2022-03-11 14:48:11	12159464	3.30884e-10	1.6944e-11	2.06937e-07	1.44394e-11	1.02137e-09	2.14413e-10	3.3888e-14	2.05902e-07	3.54415e-10	0.00104133	1.64583e-07	7.01274e-05	0.00172128		47.199	7.5337	3.55583
312	2022-03-11 14:48:49	12197961	2.83756e-10	2.24418e-11	2.12402e-07	1.35579e-11	9.26221e-10	1.83874e-10	4.48836e-14	2.1134e-07	3.21399e-10	0.000870038	2.12376e-07	6.41521e-05	0.00152077		48.6606	7.77939	3.7855
313	2022-03-11 14:49:28	12236459	2.32769e-10	2.8769e-11	2.18762e-07	1.26387e-11	8.858e-10	1.50834e-10	5.7538e-14	2.17668e-07	3.07373e-10	0.000692955	2.64338e-07	5.80641e-05	0.00141212		52.4464	7.59748	3.98461
314	2022-03-11 14:50:06	12274956	2.09549e-10	2.14794e-11	2.23062e-07	1.14218e-11	8.41757e-10	1.35788e-10	4.29588e-14	2.21947e-07	2.9209e-10	0.000611803	1.93555e-07	5.14619e-05	0.00131604		53.6997	7.25248	3.89456
315	2022-03-11 14:50:45	12313454	1.62324e-11	3.30791e-11	1.00221e-08	3.05407e-12	1.00961e-09	1.05186e-11	6.61582e-14	9.97199e-09	3.50335e-10	0.00105481	6.6344e-06	0.000306265	0.0351319		94.4279	1.71332	1.61785

## Sheet: Intergration data
Index	Time	ms	Ethylene mbar	Carbon monoxide mbar	Argon mbar	Ethylene oxide mbar	Carbon dioxide mbar	Corrected Et	Corrected CO	Corrected Ar	Corrected CO2	Et (ć)	CO (ć)	EtO (ć)	CO2 (ć)		Time, min	Initial time	6.42693e+07	Et (ć) Integral	CO (ć) Integral	EtO (ć) Integral	CO2 (ć) Integral
1	2022-03-11 11:25:46	14689	6.10384e-11	6.9455e-11	6.54697e-09	1.25216e-11	1.54076e-09	3.95529e-11	1.3891e-13	6.51424e-09	5.34644e-10	0.00607176	2.13241e-05	0.00192219	0.0820731		0	0		0	0	0	0
2	2022-03-11 11:26:39	67312	4.55369e-11	6.01999e-11	6.61548e-09	8.7419e-12	1.45029e-09	2.95079e-11	1.204e-13	6.5824e-09	5.03251e-10	0.00448285	1.82912e-05	0.00132807	0.0764539		0.883333	0.883333		0.00466162	1.74967e-05	0.00143553	0.0700161
3	2022-03-11 11:27:20	108409	3.19167e-11	5.98109e-11	5.8587e-09	8.0195e-12	1.29576e-09	2.0682e-11	1.19622e-13	5.82941e-09	4.49629e-10	0.00354788	2.05204e-05	0.0013757	0.0771311		1.56667	1.56667		0.00740545	3.07573e-05	0.00235932	0.122491
4	2022-03-11 11:28:01	149506	2.94657e-11	6.08961e-11	6.19398e-09	7.04017e-12	1.26876e-09	1.90938e-11	1.21792e-13	6.16301e-09	4.4026e-10	0.00309812	1.97618e-05	0.00114233	0.0714358		2.25	2.25		0.00967617	4.45204e-05	0.00321964	0.173251
5	2022-03-11 11:28:42	190604	2.76812e-11	4.36039e-11	1.53366e-07	8.1829e-12	1.61826e-09	1.79374e-11	8.72078e-14	1.52599e-07	5.61536e-10	0.000117546	5.71483e-07	5.36235e-05	0.00367981		2.93333	2.93333		0.0107749	5.14676e-05	0.00362826	0.198916
6	2022-03-11 11:29:25	233242	3.21424e-11	3.24751e-11	4.05184e-07	6.53277e-12	1.15191e-09	2.08283e-11	6.49502e-14	4.03158e-07	3.99713e-10	5.16628e-05	1.61104e-07	1.6204e-05	0.000991454		3.65	3.65		0.0108355	5.17302e-05	0.00365328	0.20059
7	2022-03-11 11:30:03	271739	1.48027e-11	3.53213e-11	4.54276e-07	5.62655e-12	1.01297e-09	9.59215e-12	7.06426e-14	4.52005e-07	3.51501e-10	2.12214e-05	1.56287e-07	1.2448e-05	0.000777648		4.28333	4.28333		0.0108586	5.18307e-05	0.00366236	0.20115
8	2022-03-11 11:30:42	310236	6.92879e-10	3.3591e-11	4.49708e-07	2.63683e-10	1.37508e-08	4.48986e-10	6.7182e-14	4.47459e-07	4.77153e-09	0.00100341	1.50141e-07	0.000589289	0.0106636		4.93333	4.93333		0.0111916	5.19302e-05	0.00385792	0.204868
9	2022-03-11 11:31:27	355646	1.2171e-08	3.90787e-11	4.42809e-07	4.64672e-10	1.5093e-08	7.88681e-09	7.81574e-14	4.40595e-07	5.23727e-09	0.0179004	1.77391e-07	0.00105465	0.0118868		5.68333	5.68333		0.0182805	5.20531e-05	0.0044744	0.213325
10	2022-03-11 11:31:57	385373	1.33084e-08	4.19147e-11	4.01422e-07	4.63626e-10	1.05719e-08	8.62384e-09	8.38294e-14	3.99415e-07	3.66845e-09	0.0215912	2.09881e-07	0.00116076	0.00918456		6.18333	6.18333		0.0281534	5.21499e-05	0.00502825	0.218593
11	2022-03-11 11:32:27	415102	1.40723e-08	5.0832e-11	3.94703e-07	4.34001e-10	7.2025e-09	9.11885e-09	1.01664e-13	3.92729e-07	2.49927e-09	0.0232192	2.58865e-07	0.00110509	0.00636384		6.68333	6.68333		0.039356	5.22671e-05	0.00559471	0.22248
12	2022-03-11 11:32:56	444830	1.28737e-08	4.95318e-11	4.19876e-07	2.61936e-10	4.29688e-09	8.34216e-09	9.90636e-14	4.17777e-07	1.49102e-09	0.019968	2.37121e-07	0.000626976	0.00356893		7.16667	7.16667		0.0497929	5.23869e-05	0.00601329	0.22488
13	2022-03-11 11:33:29	477216	4.06132e-09	3.77887e-11	3.58063e-07	1.19703e-10	2.75061e-09	2.63174e-09	7.55774e-14	3.56273e-07	9.54462e-10	0.00738686	2.12134e-07	0.000335987	0.00267902		7.71667	7.71667		0.0573154	5.25105e-05	0.00627811	0.226598
14	2022-03-11 11:34:01	509084	1.49258e-09	3.14002e-11	3.81445e-07	6.66446e-11	2.15636e-09	9.67192e-10	6.28004e-14	3.79538e-07	7.48257e-10	0.00254834	1.65465e-07	0.000175594	0.0019715		8.25	8.25		0.0599648	5.26112e-05	0.00641453	0.227838
15	2022-03-11 11:34:40	548492	5.15225e-10	3.59561e-11	3.92374e-07	3.51568e-11	2.01971e-09	3.33866e-10	7.19122e-14	3.90412e-07	7.00839e-10	0.000855162	1.84196e-07	9.00505e-05	0.00179513		8.9	8.9		0.061071	5.27248e-05	0.00650086	0.229063
16	2022-03-11 11:35:18	586989	1.87006e-10	2.49092e-11	1.0311e-07	2.66911e-11	2.72446e-09	1.2118e-10	4.98184e-14	1.02594e-07	9.45388e-10	0.00118115	4.85586e-07	0.000260161	0.0092148		9.53333	9.53333		0.0617158	5.29369e-05	0.00661177	0.232549
17	2022-03-11 11:35:57	625486	7.79911e-11	3.49528e-11	2.37104e-08	2.2246e-11	2.4941e-09	5.05382e-11	6.99056e-14	2.35918e-08	8.65453e-10	0.00214219	2.96313e-06	0.000942953	0.0366844		10.1833	10.1833		0.0627959	5.40577e-05	0.00700278	0.247466
18	2022-03-11 11:36:37	665004	4.18711e-11	3.50653e-11	9.25667e-09	1.91393e-11	2.22306e-09	2.71325e-11	7.01306e-14	9.21039e-09	7.71402e-10	0.00294586	7.61429e-06	0.00207801	0.0837535		10.85	10.85		0.0644919	5.75836e-05	0.00800977	0.287612
19	2022-03-11 11:37:16	704001	3.57974e-11	3.36115e-11	6.28325e-09	1.67452e-11	1.99883e-09	2.31967e-11	6.7223e-14	6.25183e-09	6.93594e-10	0.00371039	1.07525e-05	0.00267845	0.110942		11.5	11.5		0.0666552	6.35528e-05	0.00955562	0.350889
20	2022-03-11 11:37:58	746119	4.22904e-11	2.84516e-11	5.64543e-09	1.54714e-11	1.77819e-09	2.74042e-11	5.69032e-14	5.6172e-09	6.17032e-10	0.00487862	1.01302e-05	0.00275429	0.109847		12.2	12.2		0.0696613	7.08617e-05	0.0114571	0.428165
21	2022-03-11 11:38:39	787216	1.84254e-11	4.90813e-11	5.41917e-09	1.41771e-11	1.68305e-09	1.19397e-11	9.81626e-14	5.39207e-09	5.84018e-10	0.0022143	1.8205e-05	0.00262925	0.108311		12.8833	12.8833		0.0720847	8.05429e-05	0.0132964	0.502702
22	2022-03-11 11:39:20	828314	3.57221e-11	5.17125e-11	5.30354e-09	1.32053e-11	1.56571e-09	2.31479e-11	1.03425e-13	5.27702e-09	5.43301e-10	0.00438655	1.95991e-05	0.00250242	0.102956		13.5667	13.5667		0.07434	9.34593e-05	0.0150498	0.574885
23	2022-03-11 11:40:01	869411	2.21342e-11	4.94396e-11	5.25134e-09	1.21421e-11	1.47921e-09	1.4343e-11	9.88792e-14	5.22508e-09	5.13286e-10	0.00274502	1.89239e-05	0.00232381	0.098235		14.25	14.25		0.0767767	0.000106621	0.0166987	0.643625
24	2022-03-11 11:40:42	910509	2.86057e-11	4.01947e-11	5.23208e-09	1.17873e-11	1.42534e-09	1.85365e-11	8.03894e-14	5.20592e-09	4.94593e-10	0.00356066	1.54419e-05	0.00226421	0.0950059		14.9333	14.9333		0.0789311	0.000118363	0.0182663	0.709649
25	2022-03-11 11:41:23	951606	2.56494e-11	2.96085e-11	5.17914e-09	1.11853e-11	1.36522e-09	1.66208e-11	5.9217e-14	5.15324e-09	4.73731e-10	0.00322531	1.14912e-05	0.00217054	0.0919288		15.6167	15.6167		0.0812496	0.000127565	0.0197815	0.773518
26	2022-03-11 11:42:04	992704	2.90787e-11	3.38266e-11	5.18661e-09	1.05102e-11	1.32467e-09	1.8843e-11	6.76532e-14	5.16068e-09	4.5966e-10	0.00365126	1.31094e-05	0.00203659	0.0890698		16.3	16.3		0.0835991	0.00013597	0.0212189	0.835359
27	2022-03-11 11:42:45	1033801	2.30049e-11	4.0512e-11	5.15789e-09	1.00018e-11	1.28592e-09	1.49072e-11	8.1024e-14	5.1321e-09	4.46214e-10	0.00290469	1.57877e-05	0.00194887	0.0869457		16.9833	16.9833		0.0858391	0.000145844	0.0225806	0.895498
28	2022-03-11 11:43:26	1074899	3.85924e-11	4.03175e-11	5.11283e-09	1.00394e-11	1.25593e-09	2.50079e-11	8.0635e-14	5.08727e-09	4.35808e-10	0.00491578	1.58504e-05	0.00197344	0.0856664		17.6667	17.6667		0.0885111	0.000156653	0.0239208	0.954474
29	2022-03-11 11:44:07	1115996	2.29834e-11	4.68391e-11	5.14907e-09	9.42775e-12	1.21501e-09	1.48932e-11	9.36782e-14	5.12332e-09	4.21608e-10	0.00290695	1.82847e-05	0.00184016	0.082292		18.35	18.35		0.0911838	0.000168316	0.0252237	1.01186
30	2022-03-11 11:44:49	1157094	1.55874e-11	3.69491e-11	5.12801e-09	8.99023e-12	1.19558e-09	1.01006e-11	7.38982e-14	5.10237e-09	4.14866e-10	0.0019796	1.44831e-05	0.00176197	0.0813085		19.05	19.05		0.0928941	0.000179785	0.0264845	1.06912
31	2022-03-11 11:45:30	1198191	1.68129e-11	4.27337e-11	5.08525e-09	8.8193e-12	1.18958e-09	1.08948e-11	8.54674e-14	5.05982e-09	4.12784e-10	0.00215319	1.68914e-05	0.00174301	0.0815808		19.7333	19.7333		0.0943062	0.000190504	0.027682	1.12477
32	2022-03-11 11:46:11	1239289	2.49829e-11	4.36449e-11	5.05065e-09	8.514e-12	1.16906e-09	1.61889e-11	8.72898e-14	5.0254e-09	4.05664e-10	0.00322142	1.73697e-05	0.00169419	0.0807227		20.4167	20.4167		0.0961425	0.00020221	0.0288564	1.18023
33	2022-03-11 11:46:52	1280386	2.37897e-11	2.77451e-11	5.07781e-09	8.3377e-12	1.14051e-09	1.54157e-11	5.54902e-14	5.05242e-09	3.95757e-10	0.00305116	1.09829e-05	0.00165024	0.0783302		21.1	21.1		0.0982856	0.000211897	0.0299991	1.23457
34	2022-03-11 11:47:33	1321484	1.66947e-11	1.06475e-11	5.0429e-09	8.3635e-12	1.14411e-09	1.08182e-11	2.1295e-14	5.01769e-09	3.97006e-10	0.00215601	4.24399e-06	0.0016668	0.0791214		21.7833	21.7833		0.100065	0.0002171	0.0311324	1.28837
35	2022-03-11 11:48:14	1362581	3.37441e-11	5.05863e-11	4.57081e-09	8.6688e-12	1.11699e-09	2.18662e-11	1.01173e-13	4.54796e-09	3.87596e-10	0.00480791	2.22457e-05	0.00190609	0.0852241		22.4667	22.4667		0.102444	0.000226151	0.0323531	1.34452
36	2022-03-11 11:48:55	1403679	-3.14974e-12	3.33351e-11	4.90583e-09	7.99263e-12	1.10356e-09	-2.04103e-12	6.66702e-14	4.8813e-09	3.82935e-10	-0.000418133	1.36583e-05	0.0016374	0.0784494		23.15	23.15		0.103944	0.000238418	0.0335638	1.40044
37	2022-03-11 11:49:36	1444776	8.05173e-12	4.04609e-11	6.51073e-08	8.20225e-12	1.27129e-09	5.21752e-12	8.09218e-14	6.47818e-08	4.41138e-10	8.054e-05	1.24914e-06	0.000126614	0.0068096		23.8333	23.8333		0.103829	0.000243511	0.0341665	1.42957
38	2022-03-11 11:50:18	1486894	2.37359e-11	2.92399e-11	3.22499e-07	7.38202e-12	1.01418e-09	1.53809e-11	5.84798e-14	3.20887e-07	3.5192e-10	4.79324e-05	1.82244e-07	2.30051e-05	0.00109671		24.5333	24.5333		0.103874	0.000244012	0.0342189	1.43234
39	2022-03-11 11:50:58	1526411	4.04199e-12	2.87485e-11	3.88701e-07	6.47365e-12	8.73436e-10	2.61921e-12	5.7497e-14	3.86757e-07	3.03082e-10	6.77223e-06	1.48664e-07	1.67383e-05	0.000783649		25.2	25.2		0.103892	0.000244122	0.0342322	1.43296
40	2022-03-11 11:51:36	1564909	1.45447e-11	3.63144e-11	3.98645e-07	1.45397e-10	5.10025e-09	9.42497e-12	7.26288e-14	3.96652e-07	1.76979e-09	2.37613e-05	1.83105e-07	0.000366561	0.00446181		25.8333	25.8333		0.103901	0.000244227	0.0343535	1.43462
41	2022-03-11 11:52:20	1608737	9.29839e-09	2.75404e-11	3.67738e-07	3.43328e-10	6.33578e-09	6.02536e-09	5.50808e-14	3.65899e-07	2.19852e-09	0.0164673	1.50535e-07	0.000938313	0.00600853		26.5667	26.5667		0.109948	0.00024435	0.034832	1.43846
42	2022-03-11 11:52:54	1642155	1.2208e-08	2.12542e-11	3.68992e-07	3.41386e-10	4.34464e-09	7.91078e-09	4.25084e-14	3.67147e-07	1.50759e-09	0.0215466	1.1578e-07	0.000929835	0.00410623		27.1333	27.1333		0.120719	0.000244425	0.0353613	1.44133
43	2022-03-11 11:53:23	1671921	1.28327e-08	3.45023e-11	3.64872e-07	3.26621e-10	3.25391e-09	8.31559e-09	6.90046e-14	3.63048e-07	1.12911e-09	0.022905	1.9007e-07	0.000899664	0.00311008		27.6167	27.6167		0.131461	0.000244499	0.0358034	1.44307
44	2022-03-11 11:53:53	1701687	1.25828e-08	3.81266e-11	3.87447e-07	2.18915e-10	2.36716e-09	8.15365e-09	7.62532e-14	3.8551e-07	8.21405e-10	0.0211503	1.97798e-07	0.000567859	0.0021307		28.1167	28.1167		0.142475	0.000244596	0.0361703	1.44438
45	2022-03-11 11:54:26	1734045	4.2264e-09	3.89047e-11	3.37549e-07	8.63085e-11	1.73404e-09	2.73871e-09	7.78094e-14	3.35861e-07	6.01712e-10	0.00815428	2.31671e-07	0.000256977	0.00179155		28.6667	28.6667		0.150534	0.000244714	0.0363971	1.44546
46	2022-03-11 11:54:57	1765911	1.55123e-09	1.88278e-11	3.59676e-07	4.44663e-11	1.46636e-09	1.0052e-09	3.76556e-14	3.57878e-07	5.08827e-10	0.00280877	1.05219e-07	0.00012425	0.00142179		29.1833	29.1833		0.153366	0.000244801	0.0364956	1.44629
47	2022-03-11 11:55:37	1805318	5.39864e-10	1.97492e-11	3.8467e-07	2.34113e-11	1.44261e-09	3.49832e-10	3.94984e-14	3.82747e-07	5.00586e-10	0.000914004	1.03197e-07	6.11666e-05	0.00130788		29.85	29.85		0.154607	0.000244871	0.0365574	1.4472
48	2022-03-11 11:56:15	1843816	1.94983e-10	1.70156e-11	1.16727e-07	2.00949e-11	2.44803e-09	1.26349e-10	3.40312e-14	1.16143e-07	8.49466e-10	0.00108787	2.9301e-07	0.000173018	0.00731395		30.4833	30.4833		0.155241	0.000244996	0.0366316	1.44993
49	2022-03-11 11:56:54	1882314	7.08531e-11	3.86487e-11	2.62344e-08	1.83545e-11	2.30741e-09	4.59128e-11	7.72974e-14	2.61032e-08	8.00671e-10	0.00175889	2.96122e-06	0.000703151	0.0306733		31.1333	31.1333		0.156166	0.000246054	0.0369163	1.46228
50	2022-03-11 11:57:33	1921831	3.30777e-11	2.62504e-11	9.76733e-09	1.64926e-11	2.05774e-09	2.14343e-11	5.25008e-14	9.71849e-09	7.14036e-10	0.00220552	5.40215e-06	0.00169703	0.0734719		31.7833	31.7833		0.157454	0.000248772	0.0376964	1.49613
51	2022-03-11 11:58:12	1960829	3.42171e-11	3.1523e-11	6.45796e-09	1.44802e-11	1.83901e-09	2.21727e-11	6.3046e-14	6.42567e-09	6.38136e-10	0.00345064	9.81158e-06	0.00225349	0.0993105		32.4333	32.4333		0.159293	0.000253716	0.0389803	1.55228
52	2022-03-11 11:58:54	2002946	3.26154e-11	3.0489e-11	5.75896e-09	1.28032e-11	1.6912e-09	2.11348e-11	6.0978e-14	5.73017e-09	5.86846e-10	0.00368834	1.06416e-05	0.00223435	0.102414		33.1333	33.1333		0.161791	0.000260875	0.0405511	1.62288
53	2022-03-11 11:59:36	2044044	2.95947e-11	4.84977e-11	5.54218e-09	1.17336e-11	1.57339e-09	1.91774e-11	9.69954e-14	5.51447e-09	5.45966e-10	0.00347764	1.75893e-05	0.00212778	0.0990061		33.8333	33.8333		0.164299	0.000270756	0.0420778	1.69338
54	2022-03-11 12:00:17	2085141	1.36632e-11	5.14361e-11	5.41088e-09	1.11692e-11	1.47956e-09	8.85375e-12	1.02872e-13	5.38383e-09	5.13407e-10	0.00164451	1.91076e-05	0.00207458	0.0953611		34.5167	34.5167		0.166049	0.000283294	0.0435136	1.75979
55	2022-03-11 12:00:58	2126239	1.86082e-11	4.15051e-11	5.31862e-09	1.0564e-11	1.41406e-09	1.20581e-11	8.30102e-14	5.29203e-09	4.90679e-10	0.00227854	1.56859e-05	0.00199621	0.0927204		35.2	35.2		0.16739	0.000295182	0.0449045	1.82405
56	2022-03-11 12:01:39	2167336	2.08657e-11	3.7287e-11	5.26624e-09	9.80615e-12	1.34327e-09	1.3521e-11	7.4574e-14	5.23991e-09	4.66115e-10	0.00258038	1.42319e-05	0.00187144	0.0889547		35.8833	35.8833		0.16905	0.000305404	0.0462259	1.88612
57	2022-03-11 12:02:20	2208434	2.90142e-11	3.44613e-11	5.23881e-09	9.17513e-12	1.30859e-09	1.88012e-11	6.89226e-14	5.21262e-09	4.54081e-10	0.00360686	1.32223e-05	0.00176018	0.0871119		36.5667	36.5667		0.171164	0.000314784	0.0474667	1.94628
58	2022-03-11 12:03:01	2249531	2.69932e-11	4.10751e-11	5.22151e-09	9.05688e-12	1.25809e-09	1.74916e-11	8.21502e-14	5.1954e-09	4.36557e-10	0.00336674	1.58121e-05	0.00174325	0.0840276		37.25	37.25		0.173547	0.000324704	0.0486637	2.00475
59	2022-03-11 12:03:42	2290629	2.42842e-11	2.67009e-11	5.22637e-09	8.50218e-12	1.21909e-09	1.57362e-11	5.34018e-14	5.20024e-09	4.23024e-10	0.00302605	1.02691e-05	0.00163496	0.0813471		37.9333	37.9333		0.175731	0.000333615	0.0498179	2.06125
60	2022-03-11 12:04:23	2331726	1.54047e-11	4.34196e-11	5.16666e-09	8.29148e-12	1.18394e-09	9.98225e-12	8.68392e-14	5.14083e-09	4.10827e-10	0.00194176	1.68921e-05	0.00161287	0.0799146		38.6167	38.6167		0.177428	0.000342895	0.0509276	2.11635
61	2022-03-11 12:05:04	2372824	2.36392e-11	3.65806e-11	5.19831e-09	8.0109e-12	1.15527e-09	1.53182e-11	7.31612e-14	5.17232e-09	4.00879e-10	0.00296157	1.41448e-05	0.0015488	0.0775046		39.3	39.3		0.179103	0.000353499	0.0520079	2.17014
62	2022-03-11 12:05:45	2413921	1.98122e-11	3.93756e-11	5.17968e-09	7.79912e-12	1.13655e-09	1.28383e-11	7.87512e-14	5.15378e-09	3.94383e-10	0.00249105	1.52803e-05	0.00151328	0.076523		39.9833	39.9833		0.180966	0.000363553	0.0530541	2.22276
63	2022-03-11 12:06:27	2455019	2.31984e-11	4.21399e-11	5.13938e-09	7.59918e-12	1.12179e-09	1.50326e-11	8.42798e-14	5.11368e-09	3.89261e-10	0.00293967	1.64812e-05	0.00148605	0.0761215		40.6833	40.6833		0.182867	0.000374669	0.0541038	2.27619
64	2022-03-11 12:07:08	2496116	1.26419e-11	3.1308e-11	5.14421e-09	7.39385e-12	1.09911e-09	8.19195e-12	6.2616e-14	5.11849e-09	3.81391e-10	0.00160046	1.22333e-05	0.00144454	0.0745125		41.3667	41.3667		0.184418	0.00038448	0.0551051	2.32766
65	2022-03-11 12:07:49	2537214	2.40262e-11	4.71463e-11	5.12563e-09	7.24012e-12	1.06624e-09	1.5569e-11	9.42926e-14	5.1e-09	3.69985e-10	0.00305274	1.84887e-05	0.00141963	0.0725461		42.05	42.05		0.186008	0.000394977	0.0560837	2.3779
66	2022-03-11 12:08:30	2578311	2.15752e-11	5.06375e-11	5.14233e-09	7.0004e-12	1.08111e-09	1.39807e-11	1.01275e-13	5.11662e-09	3.75145e-10	0.00273242	1.97933e-05	0.00136817	0.073319		42.7333	42.7333		0.187985	0.000408057	0.0570362	2.42774
67	2022-03-11 12:09:11	2619409	2.43164e-11	2.87588e-11	4.77951e-09	7.30892e-12	1.04501e-09	1.5757e-11	5.75176e-14	4.75561e-09	3.62618e-10	0.00331335	1.20947e-05	0.0015369	0.0762506		43.4167	43.4167		0.19005	0.000418952	0.0580288	2.47884
68	2022-03-11 12:09:52	2660506	1.59099e-11	4.39418e-11	5.01234e-09	7.08532e-12	1.03037e-09	1.03096e-11	8.78836e-14	4.98728e-09	3.57538e-10	0.00206718	1.76216e-05	0.00142068	0.0716901		44.1	44.1		0.191889	0.000429105	0.0590393	2.52939
69	2022-03-11 12:10:33	2701604	1.52542e-11	2.37728e-11	4.47075e-08	7.08317e-12	1.1801e-09	9.88472e-12	4.75456e-14	4.4484e-08	4.09495e-10	0.000222209	1.06883e-06	0.00015923	0.00920545		44.7833	44.7833		0.192671	0.000435491	0.0595791	2.55703
70	2022-03-11 12:11:15	2743721	2.58107e-11	1.42616e-11	3.21603e-07	6.15007e-12	9.24429e-10	1.67253e-11	2.85232e-14	3.19995e-07	3.20777e-10	5.22675e-05	8.91364e-08	1.92193e-05	0.00100244		45.4833	45.4833		0.192767	0.000435896	0.0596415	2.5606
71	2022-03-11 12:11:55	2783239	1.62109e-11	9.8899e-12	3.94883e-07	5.5513e-12	8.28321e-10	1.05047e-11	1.97798e-14	3.92909e-07	2.87427e-10	2.67356e-05	5.0342e-08	1.41287e-05	0.000731538		46.15	46.15		0.192793	0.000435942	0.0596527	2.56118
72	2022-03-11 12:12:33	2821736	7.93348e-12	1.25826e-11	4.09395e-07	9.59545e-11	3.59021e-09	5.1409e-12	2.51652e-14	4.07348e-07	1.2458e-09	1.26204e-05	6.17781e-08	0.000235559	0.00305833		46.7833	46.7833		0.192806	0.000435978	0.0597317	2.56238
73	2022-03-11 12:13:17	2865565	8.6149e-09	4.36142e-11	3.67022e-07	3.11625e-10	5.79576e-09	5.58246e-09	8.72284e-14	3.65187e-07	2.01113e-09	0.0152866	2.3886e-07	0.00085333	0.00550712		47.5167	47.5167		0.198416	0.000436088	0.060131	2.56552
74	2022-03-11 12:13:50	2898982	1.18384e-08	3.84644e-11	3.67918e-07	3.21287e-10	4.11548e-09	7.67128e-09	7.69288e-14	3.66078e-07	1.42807e-09	0.0209553	2.10143e-07	0.000877645	0.003901		48.0667	48.0667		0.208382	0.000436212	0.060607	2.5681
75	2022-03-11 12:14:17	2925499	1.25082e-08	3.9007e-11	3.61109e-07	3.03953e-10	2.99596e-09	8.10531e-09	7.8014e-14	3.59303e-07	1.0396e-09	0.0225584	2.17126e-07	0.000845951	0.00289337		48.5167	48.5167		0.218173	0.000436308	0.0609948	2.56963
76	2022-03-11 12:14:47	2955266	1.27663e-08	2.83799e-11	3.64155e-07	2.69073e-10	2.38372e-09	8.27256e-09	5.67598e-14	3.62334e-07	8.27151e-10	0.0228313	1.5665e-07	0.00074261	0.00228284		49.0167	49.0167		0.22952	0.000436401	0.0613919	2.57093
77	2022-03-11 12:15:19	2987623	5.19827e-09	3.05094e-11	3.36295e-07	9.25253e-11	1.60123e-09	3.36848e-09	6.10188e-14	3.34614e-07	5.55627e-10	0.0100668	1.82356e-07	0.000276514	0.0016605		49.55	49.55		0.238293	0.000436492	0.0616637	2.57198
78	2022-03-11 12:15:51	3019489	1.8389e-09	1.98004e-11	3.53584e-07	4.56176e-11	1.33764e-09	1.19161e-09	3.96008e-14	3.51816e-07	4.64161e-10	0.00338702	1.12561e-07	0.000129663	0.00131933		50.0833	50.0833		0.241881	0.00043657	0.061772	2.57277
79	2022-03-11 12:16:30	3058897	6.18349e-10	2.7909e-11	3.85476e-07	2.24718e-11	1.1633e-09	4.0069e-10	5.5818e-14	3.83549e-07	4.03665e-10	0.00104469	1.4553e-07	5.85892e-05	0.00105245		50.7333	50.7333		0.243321	0.000436654	0.0618332	2.57354
80	2022-03-11 12:17:09	3097394	2.20492e-10	1.95751e-11	1.50678e-07	1.88049e-11	2.23819e-09	1.42879e-10	3.91502e-14	1.49925e-07	7.76652e-10	0.000953004	2.61133e-07	0.000125429	0.00518028		51.3833	51.3833		0.24397	0.000436786	0.061893	2.57557
81	2022-03-11 12:17:47	3135891	9.59866e-11	3.43282e-11	3.26614e-08	1.74418e-11	2.16644e-09	6.21993e-11	6.86564e-14	3.24981e-08	7.51755e-10	0.00191394	2.11263e-06	0.000536702	0.0231323		52.0167	52.0167		0.244878	0.000437538	0.0621027	2.58454
82	2022-03-11 12:18:27	3175409	5.97269e-11	3.29972e-11	1.10406e-08	1.57433e-11	1.9344e-09	3.8703e-11	6.59944e-14	1.09854e-08	6.71237e-10	0.00352313	6.00747e-06	0.00143311	0.0611026		52.6833	52.6833		0.24669	0.000440245	0.0627593	2.61261
83	2022-03-11 12:19:06	3214406	3.22714e-11	3.67853e-11	6.6966e-09	1.34439e-11	1.73128e-09	2.09119e-11	7.35706e-14	6.66312e-09	6.00754e-10	0.00313845	1.10415e-05	0.00201766	0.0901611		53.3333	53.3333		0.248855	0.000445785	0.0638808	2.66178
84	2022-03-11 12:19:48	3256524	3.19704e-11	3.7799e-11	5.80464e-09	1.2198e-11	1.59426e-09	2.07168e-11	7.5598e-14	5.77562e-09	5.53208e-10	0.00358694	1.30892e-05	0.00211198	0.0957834		54.0333	54.0333		0.251209	0.000454231	0.0653262	2.72686
85	2022-03-11 12:20:29	3297621	4.08176e-11	1.9268e-11	5.52487e-09	1.11864e-11	1.47716e-09	2.64498e-11	3.8536e-14	5.49725e-09	5.12575e-10	0.00481146	7.01006e-06	0.00203491	0.0932421		54.7167	54.7167		0.254079	0.000461098	0.066743	2.79144
86	2022-03-11 12:21:10	3338719	3.39054e-11	3.63861e-11	5.39074e-09	1.06801e-11	1.39331e-09	2.19707e-11	7.27722e-14	5.36379e-09	4.83479e-10	0.00409612	1.35673e-05	0.00199115	0.0901376		55.4	55.4		0.257122	0.000468129	0.0681186	2.85409
87	2022-03-11 12:21:51	3379816	1.34804e-11	4.52625e-11	5.32433e-09	9.73628e-12	1.32731e-09	8.7353e-12	9.0525e-14	5.29771e-09	4.60577e-10	0.00164888	1.70876e-05	0.00183783	0.0869388		56.0833	56.0833		0.259085	0.000478603	0.0694268	2.9146
88	2022-03-11 12:22:32	3420914	2.19514e-11	3.62428e-11	5.31017e-09	9.331e-12	1.25029e-09	1.42245e-11	7.24856e-14	5.28362e-09	4.33851e-10	0.00269219	1.37189e-05	0.00176602	0.0821124		56.7667	56.7667		0.260568	0.000489128	0.0706581	2.97235
89	2022-03-11 12:23:14	3462011	1.92962e-11	3.83723e-11	5.28311e-09	8.65375e-12	1.20301e-09	1.25039e-11	7.67446e-14	5.25669e-09	4.17444e-10	0.00237867	1.45994e-05	0.00164623	0.079412		57.4667	57.4667		0.262343	0.00049904	0.0718524	3.02889
90	2022-03-11 12:23:55	3503109	2.67029e-11	3.53418e-11	5.21103e-09	8.19795e-12	1.16091e-09	1.73035e-11	7.06836e-14	5.18497e-09	4.02836e-10	0.00333723	1.36324e-05	0.0015811	0.0776929		58.15	58.15		0.264296	0.000508686	0.0729551	3.08257
91	2022-03-11 12:24:36	3544206	8.09473e-12	2.79909e-11	5.18379e-09	7.9593e-12	1.15047e-09	5.24539e-12	5.59818e-14	5.15787e-09	3.99213e-10	0.00101697	1.08537e-05	0.00154314	0.0773988		58.8333	58.8333		0.265784	0.000517052	0.0740226	3.13555
92	2022-03-11 12:25:17	3585304	3.09492e-11	3.63042e-11	5.26332e-09	7.65937e-12	1.13643e-09	2.00551e-11	7.26084e-14	5.237e-09	3.94341e-10	0.0038295	1.38645e-05	0.00146255	0.075299		59.5167	59.5167		0.26744	0.000525497	0.0750495	3.18773
93	2022-03-11 12:25:58	3626401	3.08417e-11	3.48299e-11	5.22906e-09	7.4304e-12	1.10884e-09	1.99854e-11	6.96598e-14	5.20291e-09	3.84767e-10	0.0038412	1.33886e-05	0.00142812	0.0739523		60.2	60.2		0.27006	0.000534809	0.0760371	3.23872
94	2022-03-11 12:26:39	3667499	3.69799e-12	3.22499e-11	5.2064e-09	7.19927e-12	1.09816e-09	2.3963e-12	6.44998e-14	5.18037e-09	3.81062e-10	0.000462573	1.24508e-05	0.00138972	0.0735588		60.8833	60.8833		0.271531	0.000543637	0.0769999	3.28912
95	2022-03-11 12:27:20	3708596	2.03819e-11	2.97109e-11	5.20212e-09	6.9316e-12	1.09312e-09	1.32075e-11	5.94218e-14	5.17611e-09	3.79313e-10	0.00255162	1.148e-05	0.00133915	0.0732814		61.5667	61.5667		0.272561	0.000551813	0.0779323	3.33929
96	2022-03-11 12:28:01	3749694	2.06507e-11	4.79551e-11	5.2236e-09	6.55105e-12	1.07164e-09	1.33817e-11	9.59102e-14	5.19748e-09	3.71859e-10	0.00257464	1.84532e-05	0.00126043	0.071546		62.25	62.25		0.274312	0.000562041	0.0788205	3.38877
97	2022-03-11 12:28:41	3789751	2.05647e-11	3.8618e-11	5.20567e-09	6.71552e-12	1.06348e-09	1.33259e-11	7.7236e-14	5.17964e-09	3.69028e-10	0.00257275	1.49115e-05	0.00129652	0.0712458		62.9167	62.9167		0.276028	0.000573162	0.0796728	3.43637
98	2022-03-11 12:29:22	3830849	1.99949e-11	5.61968e-11	5.23877e-09	6.52417e-12	1.05136e-09	1.29567e-11	1.12394e-13	5.21258e-09	3.64822e-10	0.00248566	2.1562e-05	0.00125162	0.0699888		63.6	63.6		0.277756	0.000585624	0.0805434	3.48463
99	2022-03-11 12:30:03	3871946	7.86898e-12	3.95291e-11	5.00987e-09	6.66392e-12	1.03241e-09	5.0991e-12	7.90582e-14	4.98482e-09	3.58246e-10	0.00102293	1.58598e-05	0.00133684	0.0718674		64.2833	64.2833		0.278955	0.00059841	0.0814278	3.53309
100	2022-03-11 12:30:45	3913044	1.98014e-11	2.9885e-11	5.00987e-09	6.31455e-12	1.01921e-09	1.28313e-11	5.977e-14	4.98482e-09	3.53666e-10	0.00257408	1.19904e-05	0.00126676	0.0709486		64.9833	64.9833		0.280214	0.000608157	0.082339	3.58308
101	2022-03-11 12:31:26	3954141	2.29727e-11	5.14566e-11	8.00417e-09	6.44892e-12	1.13704e-09	1.48863e-11	1.02913e-13	7.96415e-09	3.94553e-10	0.00186917	1.29221e-05	0.000809744	0.0495411		65.6667	65.6667		0.281732	0.000616669	0.0830485	3.62425
102	2022-03-11 12:32:07	3995239	2.65954e-11	2.2749e-11	2.93116e-07	5.96625e-12	9.40143e-10	1.72338e-11	4.5498e-14	2.9165e-07	3.2623e-10	5.90907e-05	1.56002e-07	2.04569e-05	0.00111856		66.35	66.35		0.282391	0.000621137	0.0833322	3.64156
103	2022-03-11 12:32:49	4037877	7.99798e-12	2.67726e-11	3.79563e-07	4.95252e-12	8.21129e-10	5.18269e-12	5.35452e-14	3.77665e-07	2.84932e-10	1.3723e-05	1.4178e-07	1.31135e-05	0.000754456		67.05	67.05		0.282416	0.000621242	0.0833439	3.64221
104	2022-03-11 12:33:28	4076374	1.50392e-11	1.82032e-11	4.02228e-07	3.3813e-11	1.81946e-09	9.7454e-12	3.64064e-14	4.00217e-07	6.31353e-10	2.43503e-05	9.09667e-08	8.44867e-05	0.00157753		67.7	67.7		0.282429	0.000621317	0.0833756	3.64297
105	2022-03-11 12:34:12	4120202	7.39894e-09	2.84721e-11	3.69351e-07	2.83512e-10	5.47326e-09	4.79451e-09	5.69442e-14	3.67504e-07	1.89922e-09	0.0130461	1.54948e-07	0.000771452	0.00516789		68.4333	68.4333		0.287221	0.000621407	0.0836895	3.64544
106	2022-03-11 12:34:45	4153620	1.14541e-08	2.35885e-11	3.69799e-07	3.08914e-10	3.891e-09	7.42226e-09	4.7177e-14	3.6795e-07	1.35018e-09	0.0201719	1.28216e-07	0.000839554	0.00366946		68.9833	68.9833		0.296356	0.000621485	0.0841325	3.64787
107	2022-03-11 12:35:15	4183386	1.23705e-08	2.8595e-11	3.63887e-07	2.97225e-10	2.85979e-09	8.01608e-09	5.719e-14	3.62068e-07	9.92347e-10	0.0221397	1.57954e-07	0.00082091	0.00274078		69.4833	69.4833		0.306934	0.000621557	0.0845476	3.64947
108	2022-03-11 12:35:45	4213152	1.27972e-08	2.2319e-11	3.63259e-07	2.54651e-10	2.22906e-09	8.29259e-09	4.4638e-14	3.61443e-07	7.73484e-10	0.022943	1.235e-07	0.00070454	0.00213999		69.9833	69.9833		0.318205	0.000621627	0.084929	3.6507
109	2022-03-11 12:36:17	4245509	5.76562e-09	2.9414e-11	3.37818e-07	9.70424e-11	1.54279e-09	3.73612e-09	5.8828e-14	3.36129e-07	5.35348e-10	0.0111151	1.75016e-07	0.000288706	0.00159269		70.5167	70.5167		0.327287	0.000621707	0.0851939	3.65169
110	2022-03-11 12:36:49	4277376	2.00906e-09	1.69645e-11	3.53226e-07	4.73505e-11	1.30247e-09	1.30187e-09	3.3929e-14	3.5146e-07	4.51957e-10	0.00370418	9.65373e-08	0.000134725	0.00128594		71.05	71.05		0.331239	0.000621779	0.0853068	3.65246
111	2022-03-11 12:37:28	4316783	6.76345e-10	4.1157e-11	3.89417e-07	2.31888e-11	1.13451e-09	4.38272e-10	8.2314e-14	3.8747e-07	3.93675e-10	0.00113111	2.1244e-07	5.98467e-05	0.00101601		71.7	71.7		0.33281	0.00062188	0.08537	3.65321
112	2022-03-11 12:38:07	4355281	2.53914e-10	1.71385e-11	1.6752e-07	1.83147e-11	2.16692e-09	1.64536e-10	3.4277e-14	1.66682e-07	7.51921e-10	0.000987124	2.05643e-07	0.000109878	0.0045111		72.35	72.35		0.333499	0.000622015	0.0854252	3.655
113	2022-03-11 12:38:45	4393779	8.62256e-11	1.79473e-11	3.60561e-08	1.72623e-11	2.16044e-09	5.58742e-11	3.58946e-14	3.58758e-08	7.49673e-10	0.00155743	1.00052e-06	0.000481168	0.0208963		72.9833	72.9833		0.334304	0.000622397	0.0856123	3.66305
114	2022-03-11 12:39:25	4433296	4.07101e-11	3.31509e-11	1.1863e-08	1.51349e-11	1.9512e-09	2.63801e-11	6.63018e-14	1.18037e-08	6.77066e-10	0.00223491	5.61704e-06	0.00128222	0.0573606		73.65	73.65		0.335569	0.000624603	0.0862001	3.68913
115	2022-03-11 12:40:04	4472294	3.19382e-11	2.51651e-11	7.02047e-09	1.35256e-11	1.73488e-09	2.0696e-11	5.03302e-14	6.98537e-09	6.02003e-10	0.00296276	7.20509e-06	0.00193628	0.0861806		74.3	74.3		0.337258	0.00062877	0.0872461	3.73578
116	2022-03-11 12:40:46	4514411	2.91754e-11	2.54211e-11	6.00791e-09	1.17949e-11	1.58694e-09	1.89057e-11	5.08422e-14	5.97787e-09	5.50668e-10	0.00316261	8.50507e-06	0.00197309	0.0921178		75	75		0.339402	0.000634269	0.0886144	3.79819
117	2022-03-11 12:41:27	4555509	3.69691e-11	3.7502e-11	5.76328e-09	1.05532e-11	1.48712e-09	2.3956e-11	7.5004e-14	5.73446e-09	5.16031e-10	0.00417754	1.30795e-05	0.00184031	0.0899876		75.6833	75.6833		0.34191	0.000641644	0.0899173	3.86041
118	2022-03-11 12:42:08	4596606	2.26394e-11	3.73382e-11	5.62167e-09	9.81475e-12	1.39342e-09	1.46703e-11	7.46764e-14	5.59356e-09	4.83517e-10	0.00262272	1.33504e-05	0.00175465	0.0864417		76.3667	76.3667		0.344233	0.000650674	0.0911456	3.92069
119	2022-03-11 12:42:49	4637704	1.22657e-11	3.63451e-11	5.54402e-09	9.32778e-12	1.31724e-09	7.94817e-12	7.26902e-14	5.5163e-09	4.57082e-10	0.00144085	1.31773e-05	0.00169095	0.0828603		77.05	77.05		0.345621	0.000659738	0.0923229	3.97853
120	2022-03-11 12:43:30	4678801	3.36581e-11	3.93449e-11	5.47387e-09	8.91713e-12	1.25401e-09	2.18104e-11	7.86898e-14	5.4465e-09	4.35141e-10	0.00400449	1.44478e-05	0.00163722	0.0798938		77.7333	77.7333		0.347482	0.000669176	0.09346	4.03414
121	2022-03-11 12:44:11	4719899	2.55419e-11	4.00513e-11	5.39714e-09	8.16462e-12	1.20457e-09	1.65512e-11	8.01026e-14	5.37015e-09	4.17986e-10	0.00308206	1.49163e-05	0.00152037	0.077835		78.4167	78.4167		0.349903	0.000679209	0.0945388	4.08803
122	2022-03-11 12:44:52	4760996	3.09922e-11	2.9844e-11	5.42206e-09	7.8733e-12	1.17614e-09	2.00829e-11	5.9688e-14	5.39495e-09	4.08121e-10	0.00372255	1.10637e-05	0.00145938	0.0756486		79.1	79.1		0.352228	0.000688085	0.0955569	4.14047
123	2022-03-11 12:45:34	4802094	3.01537e-11	3.04377e-11	5.41661e-09	7.56155e-12	1.12947e-09	1.95396e-11	6.08754e-14	5.38953e-09	3.91926e-10	0.00362548	1.12951e-05	0.00140301	0.0727199		79.8	79.8		0.3548	0.000695911	0.0965587	4.1924
124	2022-03-11 12:46:15	4843191	2.32629e-11	2.45304e-11	5.39104e-09	7.40352e-12	1.11364e-09	1.50744e-11	4.90608e-14	5.36408e-09	3.86433e-10	0.00281024	9.14616e-06	0.0013802	0.0720408		80.4833	80.4833		0.356999	0.000702895	0.0975097	4.24186
125	2022-03-11 12:46:56	4884289	8.70748e-12	3.43077e-11	5.40129e-09	6.7553e-12	1.08712e-09	5.64245e-12	6.86154e-14	5.37428e-09	3.77231e-10	0.0010499	1.27674e-05	0.00125697	0.0701918		81.1667	81.1667		0.358318	0.000710382	0.0984107	4.29046
126	2022-03-11 12:47:37	4925386	1.86404e-11	3.52599e-11	5.36215e-09	6.68972e-12	1.06228e-09	1.2079e-11	7.05198e-14	5.33534e-09	3.68611e-10	0.00226396	1.32175e-05	0.00125385	0.0690886		81.85	81.85		0.35945	0.00071926	0.0992686	4.33804
127	2022-03-11 12:48:18	4966484	1.97799e-11	3.90172e-11	5.38979e-09	6.27585e-12	1.07176e-09	1.28174e-11	7.80344e-14	5.36284e-09	3.71901e-10	0.00239003	1.45509e-05	0.00117025	0.0693477		82.5333	82.5333		0.36104	0.000728748	0.100097	4.38534
128	2022-03-11 12:48:59	5007581	2.09947e-11	4.40339e-11	5.33002e-09	6.22317e-12	1.05209e-09	1.36046e-11	8.80678e-14	5.30337e-09	3.65075e-10	0.00256527	1.6606e-05	0.00117344	0.0688383		83.2167	83.2167		0.362733	0.000739393	0.100898	4.43256
129	2022-03-11 12:49:40	5048679	2.01239e-11	3.9519e-11	5.28573e-09	6.02322e-12	1.02845e-09	1.30403e-11	7.9038e-14	5.2593e-09	3.56872e-10	0.00247947	1.50282e-05	0.00114525	0.0678554		83.9	83.9		0.364457	0.000750202	0.10169	4.47926
130	2022-03-11 12:50:21	5089776	2.33167e-11	3.9949e-11	5.23407e-09	6.42527e-12	1.00145e-09	1.51092e-11	7.9898e-14	5.2079e-09	3.47503e-10	0.00290121	1.53417e-05	0.00123375	0.0667262		84.5833	84.5833		0.366295	0.000760578	0.102503	4.52524
131	2022-03-11 12:51:02	5130874	4.49349e-12	3.18915e-11	5.03878e-09	6.5274e-12	9.86814e-10	2.91178e-12	6.3783e-14	5.01359e-09	3.42424e-10	0.000580778	1.2722e-05	0.00130194	0.0682993		85.2667	85.2667		0.367485	0.000770166	0.103369	4.57138
132	2022-03-11 12:51:43	5171971	2.48002e-11	4.65423e-11	4.96071e-09	6.25435e-12	9.777e-10	1.60705e-11	9.30846e-14	4.93591e-09	3.39262e-10	0.00325584	1.88587e-05	0.00126711	0.0687335		85.95	85.95		0.368796	0.000780956	0.104247	4.6182
133	2022-03-11 12:52:25	5213069	1.86727e-11	3.60072e-11	6.43258e-09	6.16727e-12	1.08531e-09	1.20999e-11	7.20144e-14	6.40042e-09	3.76603e-10	0.00189049	1.12515e-05	0.000963573	0.0588403		86.65	86.65		0.370597	0.000791495	0.105027	4.66285
134	2022-03-11 12:53:06	5254166	1.59852e-11	1.90018e-11	2.85053e-07	6.10385e-12	9.0295e-10	1.03584e-11	3.80036e-14	2.83628e-07	3.13324e-10	3.65211e-05	1.33991e-07	2.15206e-05	0.0011047		87.3333	87.3333		0.371255	0.000795385	0.105364	4.68333
135	2022-03-11 12:53:48	5296804	1.57594e-11	1.45585e-11	3.76518e-07	5.30512e-12	7.98814e-10	1.02121e-11	2.9117e-14	3.74635e-07	2.77188e-10	2.72587e-05	7.77209e-08	1.41608e-05	0.000739889		88.0333	88.0333		0.371278	0.000795459	0.105377	4.68397
136	2022-03-11 12:54:27	5335301	9.59973e-12	1.09035e-11	4.02049e-07	2.37005e-11	1.53067e-09	6.22063e-12	2.1807e-14	4.00039e-07	5.31142e-10	1.55501e-05	5.45122e-08	5.92455e-05	0.00132773		88.6833	88.6833		0.371291	0.000795502	0.1054	4.68465
137	2022-03-11 12:55:11	5379130	7.07836e-09	3.1912e-11	3.68187e-07	2.74193e-10	5.51034e-09	4.58678e-09	6.3824e-14	3.66346e-07	1.91209e-09	0.0125203	1.74218e-07	0.000748454	0.00521935		89.4167	89.4167		0.375888	0.000795586	0.105697	4.68705
138	2022-03-11 12:55:44	5412547	1.12566e-08	3.91299e-11	3.69083e-07	3.01144e-10	3.92807e-09	7.29428e-09	7.82598e-14	3.67238e-07	1.36304e-09	0.0198626	2.13104e-07	0.000820025	0.0037116		89.9667	89.9667		0.384793	0.000795693	0.106128	4.6895
139	2022-03-11 12:56:14	5442314	1.22462e-08	1.90632e-11	3.61647e-07	2.89031e-10	2.84635e-09	7.93554e-09	3.81264e-14	3.59839e-07	9.87683e-10	0.022053	1.05954e-07	0.000803224	0.00274479		90.4667	90.4667		0.395272	0.000795772	0.106534	4.69112
140	2022-03-11 12:56:44	5472081	1.25936e-08	2.69261e-11	3.61199e-07	2.51496e-10	2.17424e-09	8.16065e-09	5.38522e-14	3.59393e-07	7.54461e-10	0.0227068	1.49842e-07	0.00069978	0.00209927		90.9667	90.9667		0.406462	0.000795836	0.106909	4.69233
141	2022-03-11 12:57:16	5504438	6.03324e-09	3.28744e-11	3.36832e-07	9.79422e-11	1.53596e-09	3.90954e-09	6.57488e-14	3.35148e-07	5.32978e-10	0.0116651	1.96178e-07	0.000292236	0.00159028		91.5	91.5		0.415628	0.000795929	0.107174	4.69331
142	2022-03-11 12:57:48	5536306	2.12508e-09	1.95137e-11	3.51613e-07	4.72054e-11	1.27249e-09	1.37705e-09	3.90274e-14	3.49855e-07	4.41554e-10	0.00393607	1.11553e-07	0.000134928	0.00126211		92.0333	92.0333		0.419788	0.000796011	0.107288	4.69407
143	2022-03-11 12:58:27	5575713	7.00221e-10	1.83569e-11	3.8897e-07	2.26169e-11	1.11111e-09	4.53743e-10	3.67138e-14	3.87025e-07	3.85555e-10	0.00117239	9.48615e-08	5.84378e-05	0.000996202		92.6833	92.6833		0.421448	0.000796078	0.107351	4.69481
144	2022-03-11 12:59:06	5614211	2.58762e-10	3.10418e-11	1.76658e-07	1.78632e-11	2.1302e-09	1.67678e-10	6.20836e-14	1.75775e-07	7.39179e-10	0.000953936	3.532e-07	0.000101626	0.00420527		93.3333	93.3333		0.42214	0.000796223	0.107403	4.6965
145	2022-03-11 12:59:44	5652709	7.77116e-11	2.67623e-11	3.76025e-08	1.72612e-11	2.10477e-09	5.03571e-11	5.35246e-14	3.74145e-08	7.30355e-10	0.00134593	1.43058e-06	0.000461351	0.0195207		93.9667	93.9667		0.422868	0.000796788	0.107581	4.70401
146	2022-03-11 13:00:24	5692226	6.12104e-11	1.80088e-11	1.20881e-08	1.55799e-11	1.88929e-09	3.96643e-11	3.60176e-14	1.20277e-08	6.55584e-10	0.00329776	2.99456e-06	0.00129534	0.0545063		94.6333	94.6333		0.424416	0.000798263	0.108167	4.72869
147	2022-03-11 13:01:03	5731224	3.94739e-11	1.68621e-11	6.96278e-09	1.43061e-11	1.70824e-09	2.55791e-11	3.37242e-14	6.92797e-09	5.92759e-10	0.00369215	4.86784e-06	0.00206498	0.0855604		95.2833	95.2833		0.426687	0.000800818	0.109259	4.77421
148	2022-03-11 13:01:45	5773341	2.69502e-11	4.59177e-11	5.9403e-09	1.21937e-11	1.53691e-09	1.74637e-11	9.18354e-14	5.9106e-09	5.33308e-10	0.00295465	1.55374e-05	0.00206302	0.0902291		95.9833	95.9833		0.429014	0.00080796	0.110703	4.83573
149	2022-03-11 13:02:26	5814439	2.33704e-11	4.19453e-11	5.64297e-09	1.11391e-11	1.43121e-09	1.5144e-11	8.38906e-14	5.61476e-09	4.9663e-10	0.00269718	1.49411e-05	0.0019839	0.0884509		96.6667	96.6667		0.430945	0.000818374	0.112086	4.89678
150	2022-03-11 13:03:07	5855536	2.95517e-11	3.62632e-11	5.51488e-09	9.85883e-12	1.33559e-09	1.91495e-11	7.25264e-14	5.48731e-09	4.6345e-10	0.00348978	1.32171e-05	0.00179666	0.0844585		97.35	97.35		0.433059	0.000827995	0.113378	4.95586
151	2022-03-11 13:03:48	5896634	1.87479e-11	3.96315e-11	5.48149e-09	9.2063e-12	1.27992e-09	1.21486e-11	7.9263e-14	5.45408e-09	4.44132e-10	0.00222744	1.45328e-05	0.00168796	0.0814312		98.0333	98.0333		0.435012	0.000837476	0.114568	5.01254
152	2022-03-11 13:04:29	5937731	2.50474e-11	4.68494e-11	5.43306e-09	8.5699e-12	1.22485e-09	1.62307e-11	9.36988e-14	5.40589e-09	4.25023e-10	0.00300241	1.73327e-05	0.00158529	0.0786221		98.7167	98.7167		0.436799	0.000848363	0.115687	5.06722
153	2022-03-11 13:05:10	5978829	2.23492e-11	3.43282e-11	5.40738e-09	8.514e-12	1.20086e-09	1.44823e-11	6.86564e-14	5.38034e-09	4.16698e-10	0.0026917	1.27606e-05	0.00158243	0.0774483		99.4	99.4		0.438744	0.000858645	0.116769	5.12055
154	2022-03-11 13:05:51	6019926	1.31687e-11	3.63861e-11	5.3733e-09	7.9808e-12	1.13391e-09	8.53332e-12	7.27722e-14	5.34643e-09	3.93467e-10	0.00159608	1.36114e-05	0.00149273	0.0735943		100.083	100.083		0.440209	0.000867655	0.11782	5.17215
155	2022-03-11 13:06:33	6061024	2.40047e-11	4.40953e-11	5.32309e-09	7.58627e-12	1.09768e-09	1.5555e-11	8.81906e-14	5.29647e-09	3.80895e-10	0.00293687	1.66508e-05	0.00143232	0.0719148		100.783	100.783		0.441796	0.000878247	0.118844	5.22308
156	2022-03-11 13:07:14	6102121	2.45529e-11	3.32225e-11	5.28986e-09	7.29925e-12	1.06084e-09	1.59103e-11	6.6445e-14	5.26341e-09	3.68111e-10	0.00302281	1.26239e-05	0.00138679	0.0699378		101.467	101.467		0.443832	0.000888249	0.119807	5.27155
157	2022-03-11 13:07:55	6143219	1.41147e-11	3.04377e-11	5.28961e-09	7.28957e-12	1.05281e-09	9.14633e-12	6.08754e-14	5.26316e-09	3.65325e-10	0.0017378	1.15663e-05	0.00138502	0.0694117		102.15	102.15		0.445459	0.000896514	0.120754	5.31916
158	2022-03-11 13:08:36	6184316	1.40932e-11	3.47991e-11	5.26313e-09	7.1638e-12	1.02413e-09	9.13239e-12	6.95982e-14	5.23681e-09	3.55373e-10	0.00174388	1.32902e-05	0.00136797	0.0678606		102.833	102.833		0.446648	0.000905007	0.121694	5.36606
159	2022-03-11 13:09:17	6225414	3.01967e-11	3.66728e-11	5.24056e-09	6.7768e-12	1.01909e-09	1.95675e-11	7.33456e-14	5.21436e-09	3.53624e-10	0.00375261	1.40661e-05	0.00129964	0.0678174		103.517	103.517		0.448526	0.000914354	0.122606	5.41242
160	2022-03-11 13:09:58	6266511	2.74662e-11	3.73075e-11	5.22248e-09	6.35432e-12	1.00134e-09	1.77981e-11	7.4615e-14	5.19637e-09	3.47465e-10	0.0034251	1.43591e-05	0.00122284	0.0668669		104.2	104.2		0.450979	0.000924066	0.123468	5.45843
161	2022-03-11 13:10:39	6307609	1.93822e-11	5.44563e-11	5.20864e-09	6.28015e-12	9.92214e-10	1.25597e-11	1.08913e-13	5.1826e-09	3.44298e-10	0.00242343	2.10151e-05	0.00121178	0.0664335		104.883	104.883		0.452977	0.000936152	0.1243	5.50398
162	2022-03-11 13:11:20	6348706	2.19514e-11	4.53444e-11	5.15786e-09	6.31455e-12	9.89693e-10	1.42245e-11	9.06888e-14	5.13207e-09	3.43423e-10	0.00277169	1.7671e-05	0.00123041	0.0669171		105.567	105.567		0.454752	0.00094937	0.125134	5.54954
163	2022-03-11 13:12:01	6389804	1.02339e-11	3.31713e-11	5.05636e-09	6.19845e-12	9.75179e-10	6.63157e-12	6.63426e-14	5.03108e-09	3.38387e-10	0.00131812	1.31866e-05	0.00123203	0.0672594		106.25	106.25		0.456149	0.000959913	0.125975	5.59538
164	2022-03-11 13:12:42	6430901	2.24137e-11	2.52061e-11	4.93021e-09	5.87702e-12	9.63421e-10	1.45241e-11	5.04122e-14	4.90556e-09	3.34307e-10	0.00296074	1.02765e-05	0.00119803	0.0681486		106.933	106.933		0.457611	0.000967929	0.126806	5.64165
165	2022-03-11 13:13:23	6471999	2.11344e-11	4.17713e-11	5.95218e-09	5.848e-12	1.05821e-09	1.36951e-11	8.35426e-14	5.92242e-09	3.67199e-10	0.00231242	1.41062e-05	0.000987434	0.0620015		107.617	107.617		0.459413	0.00097626	0.127552	5.68612
166	2022-03-11 13:14:05	6513096	1.62754e-11	1.7763e-11	2.80126e-07	5.5341e-12	8.93593e-10	1.05465e-11	3.5526e-14	2.78725e-07	3.10077e-10	3.78382e-05	1.27459e-07	1.9855e-05	0.00111248		108.317	108.317		0.460235	0.000981242	0.127905	5.70821
167	2022-03-11 13:14:47	6555734	4.79449e-12	2.08345e-11	3.7392e-07	4.7601e-12	7.78536e-10	3.10683e-12	4.1669e-14	3.7205e-07	2.70152e-10	8.35056e-06	1.11998e-07	1.27942e-05	0.000726117		109.017	109.017		0.460252	0.000981325	0.127916	5.70885
168	2022-03-11 13:15:26	6594231	3.50449e-12	1.92475e-11	4.02676e-07	1.66291e-11	1.25413e-09	2.27091e-12	3.8495e-14	4.00663e-07	4.35183e-10	5.66788e-06	9.60783e-08	4.1504e-05	0.00108616		109.667	109.667		0.460256	0.000981393	0.127934	5.70944
169	2022-03-11 13:16:10	6638060	6.82416e-09	3.13694e-11	3.6532e-07	2.58833e-10	4.81819e-09	4.42206e-09	6.27388e-14	3.63493e-07	1.67191e-09	0.0121654	1.726e-07	0.000712071	0.00459957		110.4	110.4		0.464719	0.000981492	0.12821	5.71152
170	2022-03-11 13:16:43	6671477	1.10987e-08	2.79397e-11	3.64424e-07	2.89503e-10	3.51366e-09	7.19196e-09	5.58794e-14	3.62602e-07	1.21924e-09	0.0198343	1.54107e-07	0.000798405	0.00336248		110.95	110.95		0.473519	0.000981581	0.128626	5.71371
171	2022-03-11 13:17:13	6701244	1.20796e-08	3.99387e-11	3.56988e-07	2.78459e-10	2.58216e-09	7.82758e-09	7.98774e-14	3.55203e-07	8.9601e-10	0.0220369	2.24878e-07	0.000783943	0.00252253		111.45	111.45		0.483987	0.000981676	0.129021	5.71518
172	2022-03-11 13:17:43	6731011	1.24632e-08	2.4295e-11	3.57167e-07	2.49296e-10	1.98179e-09	8.07615e-09	4.859e-14	3.55381e-07	6.87681e-10	0.0227253	1.36726e-07	0.000701489	0.00193505		111.95	111.95		0.495177	0.000981767	0.129393	5.7163
173	2022-03-11 13:18:15	6763368	6.25518e-09	2.29537e-11	3.33428e-07	9.62265e-11	1.4131e-09	4.05336e-09	4.59074e-14	3.31761e-07	4.90346e-10	0.0122177	1.38375e-07	0.000290048	0.00147801		112.483	112.483		0.504495	0.00098184	0.129657	5.71721
174	2022-03-11 13:18:47	6795236	2.16977e-09	1.5439e-11	3.46597e-07	4.72774e-11	1.20902e-09	1.40601e-09	3.0878e-14	3.44864e-07	4.1953e-10	0.004077	8.95367e-08	0.00013709	0.00121651		113.017	113.017		0.508841	0.000981901	0.129771	5.71793
175	2022-03-11 13:19:26	6834643	7.26817e-10	8.18022e-12	3.84938e-07	2.24212e-11	1.04249e-09	4.70977e-10	1.63604e-14	3.83013e-07	3.61744e-10	0.00122966	4.27151e-08	5.8539e-05	0.000944469		113.667	113.667		0.510565	0.000981944	0.129834	5.71863
176	2022-03-11 13:20:05	6873141	2.72082e-10	2.96392e-11	1.87139e-07	1.79406e-11	1.9422e-09	1.76309e-10	5.92784e-14	1.86203e-07	6.73943e-10	0.000946864	3.18353e-07	9.63495e-05	0.0036194		114.317	114.317		0.511273	0.000982061	0.129885	5.72011
177	2022-03-11 13:20:43	6911639	1.11713e-10	3.47787e-11	3.98561e-08	1.7458e-11	2.00819e-09	7.239e-11	6.95574e-14	3.96568e-08	6.96842e-10	0.00182541	1.75398e-06	0.000440227	0.0175718		114.95	114.95		0.512151	0.000982717	0.130055	5.72682
178	2022-03-11 13:21:23	6951156	5.38251e-11	3.64885e-11	1.26457e-08	1.54499e-11	1.81011e-09	3.48787e-11	7.2977e-14	1.25825e-08	6.28108e-10	0.002772	5.79989e-06	0.00122789	0.0499193		115.617	115.617		0.513683	0.000985235	0.130611	5.74932
179	2022-03-11 13:22:02	6990154	4.35589e-11	4.24163e-11	7.07713e-09	1.34525e-11	1.64754e-09	2.82262e-11	8.48326e-14	7.04174e-09	5.71696e-10	0.00400841	1.20471e-05	0.00191039	0.0811868		116.267	116.267		0.515887	0.000991036	0.131631	5.79193
180	2022-03-11 13:22:44	7032271	3.82484e-11	2.2575e-11	5.99362e-09	1.17013e-11	1.53008e-09	2.4785e-11	4.515e-14	5.96365e-09	5.30938e-10	0.004156	7.57086e-06	0.0019621	0.089029		116.967	116.967		0.518744	0.000997902	0.132986	5.85151
181	2022-03-11 13:23:25	7073369	2.50689e-11	1.49578e-11	5.71943e-09	1.08919e-11	1.41778e-09	1.62446e-11	2.99156e-14	5.69083e-09	4.9197e-10	0.00285453	5.25681e-06	0.00191394	0.0864495		117.65	117.65		0.521139	0.00100228	0.13431	5.91146
182	2022-03-11 13:24:06	7114466	2.28114e-11	4.42694e-11	5.58863e-09	9.63093e-12	1.33295e-09	1.47818e-11	8.85388e-14	5.56069e-09	4.62534e-10	0.00265827	1.59223e-05	0.00173197	0.0831792		118.333	118.333		0.523023	0.00100952	0.135556	5.96942
183	2022-03-11 13:24:47	7155564	2.70684e-11	2.80932e-11	5.51778e-09	9.23425e-12	1.27129e-09	1.75403e-11	5.61864e-14	5.49019e-09	4.41138e-10	0.00319485	1.0234e-05	0.00168195	0.0803501		119.017	119.017		0.525023	0.00101846	0.136722	6.02529
184	2022-03-11 13:25:28	7196661	3.15404e-11	3.73485e-11	5.44686e-09	8.45703e-12	1.19906e-09	2.04382e-11	7.4697e-14	5.41963e-09	4.16074e-10	0.00377114	1.37827e-05	0.00156045	0.0767717		119.7	119.7		0.527403	0.00102666	0.13783	6.07897
185	2022-03-11 13:26:06	7234509	2.58537e-11	3.33658e-11	5.35083e-09	8.09368e-12	1.15203e-09	1.67532e-11	6.67316e-14	5.32408e-09	3.99754e-10	0.00314669	1.25339e-05	0.0015202	0.0750843		120.333	120.333		0.529594	0.001035	0.138806	6.12706
186	2022-03-11 13:26:47	7275606	2.95409e-11	3.16356e-11	5.36578e-09	7.69377e-12	1.11976e-09	1.91425e-11	6.32712e-14	5.33895e-09	3.88557e-10	0.00358544	1.18509e-05	0.00144106	0.0727777		121.017	121.017		0.531894	0.00104333	0.139818	6.17758
187	2022-03-11 13:27:28	7316704	1.90597e-11	1.94523e-11	5.33651e-09	7.21217e-12	1.08916e-09	1.23507e-11	3.89046e-14	5.30983e-09	3.77939e-10	0.00232601	7.3269e-06	0.00135827	0.0711772		121.7	121.7		0.533913	0.00104988	0.140774	6.22676
188	2022-03-11 13:28:09	7357801	2.81757e-11	3.63758e-11	5.33167e-09	6.84775e-12	1.05821e-09	1.82579e-11	7.27516e-14	5.30501e-09	3.67199e-10	0.00344162	1.37137e-05	0.00129081	0.0692174		122.383	122.383		0.535884	0.00105707	0.141679	6.27473
189	2022-03-11 13:28:50	7398899	1.93177e-11	2.5288e-11	5.25833e-09	7.01975e-12	1.03769e-09	1.25179e-11	5.0576e-14	5.23204e-09	3.60078e-10	0.00239254	9.6666e-06	0.00134169	0.0688218		123.067	123.067		0.537877	0.00106506	0.142579	6.3219
190	2022-03-11 13:29:31	7439996	1.90489e-11	3.60482e-11	5.20618e-09	6.78862e-12	1.02125e-09	1.23437e-11	7.20964e-14	5.18015e-09	3.54374e-10	0.00238288	1.39178e-05	0.00131051	0.06841		123.75	123.75		0.539509	0.00107312	0.143485	6.36878
191	2022-03-11 13:30:13	7481094	2.01239e-11	4.53956e-11	5.17155e-09	6.6048e-12	1.01081e-09	1.30403e-11	9.07912e-14	5.14569e-09	3.50751e-10	0.00253421	1.76441e-05	0.00128356	0.068164		124.45	124.45		0.54123	0.00108416	0.144393	6.41658
192	2022-03-11 13:30:54	7522191	1.59099e-11	3.14821e-11	5.16534e-09	6.40162e-12	9.86579e-10	1.03096e-11	6.29642e-14	5.13951e-09	3.42343e-10	0.00200595	1.2251e-05	0.00124557	0.06661		125.133	125.133		0.542781	0.00109438	0.145257	6.46263
193	2022-03-11 13:31:35	7563289	1.50607e-11	2.49707e-11	5.16238e-09	6.22425e-12	9.56936e-10	9.75933e-12	4.99414e-14	5.13657e-09	3.32057e-10	0.00189997	9.72272e-06	0.00121175	0.0646457		125.817	125.817		0.544116	0.00110188	0.146096	6.50748
194	2022-03-11 13:32:16	7604386	1.97262e-11	1.25518e-11	5.12484e-09	5.92755e-12	9.67979e-10	1.27826e-11	2.51036e-14	5.09922e-09	3.35889e-10	0.00250677	4.92303e-06	0.00116244	0.0658707		126.5	126.5		0.545621	0.00110689	0.146908	6.55207
195	2022-03-11 13:32:57	7645484	-7.10573e-12	3.4277e-11	5.54909e-09	6.44247e-12	9.54186e-10	-4.60451e-12	6.8554e-14	5.52134e-09	3.31103e-10	-0.000833948	1.24162e-05	0.00116683	0.0599677		127.183	127.183		0.546193	0.00111281	0.147703	6.59507
196	2022-03-11 13:33:38	7686581	1.67377e-11	3.12261e-11	4.79239e-09	5.9727e-12	9.44107e-10	1.0846e-11	6.24522e-14	4.76843e-09	3.27605e-10	0.00227455	1.3097e-05	0.00125255	0.068703		127.867	127.867		0.546685	0.00112153	0.14853	6.63903
197	2022-03-11 13:34:19	7727679	1.72644e-11	3.59253e-11	5.20665e-09	5.6373e-12	9.97371e-10	1.11873e-11	7.18506e-14	5.18062e-09	3.46088e-10	0.00215946	1.38691e-05	0.00108815	0.0668044		128.55	128.55		0.5482	0.00113074	0.14933	6.68533
198	2022-03-11 13:35:00	7768776	2.66384e-11	2.48069e-11	2.62748e-07	5.5298e-12	8.71164e-10	1.72617e-11	4.96138e-14	2.61434e-07	3.02294e-10	6.60269e-05	1.89775e-07	2.11518e-05	0.00115629		129.233	129.233		0.54896	0.00113555	0.149709	6.70855
199	2022-03-11 13:35:43	7811414	8.05173e-12	2.0814e-11	3.76787e-07	4.76117e-12	7.9545e-10	5.21752e-12	4.1628e-14	3.74903e-07	2.76021e-10	1.3917e-05	1.11037e-07	1.26997e-05	0.000736247		129.95	129.95		0.548989	0.00113565	0.149721	6.70922
200	2022-03-11 13:36:21	7849911	9.02998e-13	1.42411e-11	4.07155e-07	5.24815e-12	7.96407e-10	5.85143e-13	2.84822e-14	4.05119e-07	2.76353e-10	1.44437e-06	7.03057e-08	1.29546e-05	0.000682153		130.583	130.583		0.548994	0.00113571	0.149729	6.70967
201	2022-03-11 13:37:05	7893740	5.94591e-09	5.05453e-11	3.64066e-07	2.42395e-10	5.18496e-09	3.85295e-09	1.01091e-13	3.62246e-07	1.79918e-09	0.0106363	2.79066e-07	0.000669145	0.00496674		131.317	131.317		0.552894	0.00113584	0.149979	6.71175
202	2022-03-11 13:37:37	7925606	1.05017e-08	2.25442e-11	3.6532e-07	2.87236e-10	3.96191e-09	6.8051e-09	4.50884e-14	3.63493e-07	1.37478e-09	0.0187214	1.24042e-07	0.00079021	0.00378214		131.85	131.85		0.560723	0.00113595	0.150368	6.71408
203	2022-03-11 13:38:11	7959023	1.19942e-08	3.85361e-11	3.58063e-07	2.75847e-10	2.79512e-09	7.77224e-09	7.70722e-14	3.56273e-07	9.69907e-10	0.0218154	2.16329e-07	0.000774258	0.00272237		132.417	132.417		0.572209	0.00113604	0.150812	6.71592
204	2022-03-11 13:38:40	7988789	1.23544e-08	3.71232e-11	3.56362e-07	2.53119e-10	2.16452e-09	8.00565e-09	7.42464e-14	3.5458e-07	7.51088e-10	0.0225778	2.09392e-07	0.000713855	0.00211825		132.9	132.9		0.582937	0.00113615	0.151171	6.71709
205	2022-03-11 13:39:13	8021146	6.88294e-09	1.47018e-11	3.33608e-07	1.02753e-10	1.50164e-09	4.46015e-09	2.94036e-14	3.3194e-07	5.21069e-10	0.0134366	8.85811e-08	0.000309553	0.00156977		133.45	133.45		0.592841	0.00113623	0.151453	6.71811
206	2022-03-11 13:39:45	8053014	2.28601e-09	3.50756e-11	3.42566e-07	4.79977e-11	1.26696e-09	1.48133e-09	7.01512e-14	3.40853e-07	4.39635e-10	0.00434596	2.05811e-07	0.000140816	0.00128981		133.983	133.983		0.597583	0.00113631	0.151573	6.71887
207	2022-03-11 13:40:16	8084881	9.40268e-10	3.93347e-11	3.77324e-07	2.65406e-11	1.0822e-09	6.09294e-10	7.86694e-14	3.75437e-07	3.75523e-10	0.00162289	2.09541e-07	7.06925e-05	0.00100023		134.5	134.5		0.599125	0.00113641	0.151627	6.71946
208	2022-03-11 13:40:53	8121038	3.9031e-10	1.78551e-11	2.89263e-07	1.72849e-11	1.74448e-09	2.52921e-10	3.57102e-14	2.87817e-07	6.05335e-10	0.000878757	1.24073e-07	6.00552e-05	0.00210319		135.117	135.117		0.599896	0.00113652	0.151668	6.72042
209	2022-03-11 13:41:31	8159536	1.21259e-10	3.75532e-11	6.12816e-08	1.77482e-11	2.03134e-09	7.85758e-11	7.51064e-14	6.09752e-08	7.04875e-10	0.00128865	1.23175e-06	0.000291072	0.01156		135.75	135.75		0.600583	0.00113695	0.151779	6.72474
210	2022-03-11 13:42:11	8199054	7.41103e-11	1.59509e-11	1.65309e-08	1.61088e-11	1.86349e-09	4.80235e-11	3.19018e-14	1.64482e-08	6.46631e-10	0.00291967	1.93953e-06	0.000979363	0.0393131		136.417	136.417		0.601985	0.001138	0.152202	6.7417
211	2022-03-11 13:42:50	8238051	4.66226e-11	3.48913e-11	7.96511e-09	1.44071e-11	1.68365e-09	3.02114e-11	6.97826e-14	7.92528e-09	5.84227e-10	0.00381203	8.80506e-06	0.00181787	0.0737168		137.067	137.067		0.604173	0.0011415	0.153111	6.77844
212	2022-03-11 13:43:29	8277049	4.14626e-11	4.0338e-11	6.13085e-09	1.24001e-11	1.53667e-09	2.68678e-11	8.0676e-14	6.1002e-09	5.33224e-10	0.00440441	1.32251e-05	0.00203274	0.087411		137.717	137.717		0.606843	0.00114866	0.154363	6.8308
213	2022-03-11 13:44:11	8319166	3.03042e-11	4.61123e-11	5.68944e-09	1.15369e-11	1.41778e-09	1.96371e-11	9.22246e-14	5.66099e-09	4.9197e-10	0.00346885	1.62912e-05	0.00203796	0.0869052		138.417	138.417		0.609599	0.00115899	0.155788	6.89181
214	2022-03-11 13:44:52	8360264	1.99304e-11	2.89635e-11	5.52014e-09	1.01168e-11	1.32659e-09	1.29149e-11	5.7927e-14	5.49254e-09	4.60327e-10	0.00235135	1.05465e-05	0.00184192	0.0838095		139.1	139.1		0.611588	0.00116816	0.157113	6.95014
215	2022-03-11 13:45:33	8401361	2.61332e-11	2.97109e-11	5.44339e-09	9.2923e-12	1.23865e-09	1.69343e-11	5.94218e-14	5.41617e-09	4.29812e-10	0.00312662	1.09712e-05	0.00171566	0.0793571		139.783	139.783		0.613459	0.00117551	0.158329	7.00589
216	2022-03-11 13:46:14	8442459	4.41071e-11	3.3499e-11	5.40305e-09	8.69353e-12	1.19966e-09	2.85814e-11	6.6998e-14	5.37603e-09	4.16282e-10	0.00531645	1.24623e-05	0.00161709	0.0774329		140.467	140.467		0.616344	0.00118351	0.159467	7.05946
217	2022-03-11 13:46:55	8483556	2.77672e-11	3.50449e-11	5.33236e-09	8.07755e-12	1.14866e-09	1.79931e-11	7.00898e-14	5.3057e-09	3.98585e-10	0.00339129	1.32103e-05	0.00152243	0.075124		141.15	141.15		0.619319	0.00119229	0.16054	7.11158
218	2022-03-11 13:47:36	8524654	3.06912e-11	3.16253e-11	5.29432e-09	7.70775e-12	1.11016e-09	1.98879e-11	6.32506e-14	5.26785e-09	3.85226e-10	0.00377534	1.20069e-05	0.00146317	0.0731277		141.833	141.833		0.621768	0.0012009	0.16156	7.16223
219	2022-03-11 13:48:17	8565751	1.88877e-11	4.15972e-11	5.24018e-09	7.40352e-12	1.07764e-09	1.22392e-11	8.31944e-14	5.21398e-09	3.73941e-10	0.00234739	1.5956e-05	0.00141994	0.0717189		142.517	142.517		0.62386	0.00121046	0.162545	7.21172
220	2022-03-11 13:48:58	8606849	3.56791e-11	3.85668e-11	5.22067e-09	7.2971e-12	1.05376e-09	2.31201e-11	7.71336e-14	5.19457e-09	3.65655e-10	0.00445082	1.48489e-05	0.00140476	0.0703918		143.2	143.2		0.626182	0.00122098	0.16351	7.26028
221	2022-03-11 13:49:39	8647946	2.24997e-11	2.40083e-11	5.24626e-09	6.923e-12	1.04189e-09	1.45798e-11	4.80166e-14	5.22003e-09	3.61536e-10	0.00279305	9.19853e-06	0.00132624	0.0692594		143.883	143.883		0.628657	0.0012292	0.164443	7.30799
222	2022-03-11 13:50:21	8689044	8.10548e-12	3.99387e-11	5.22204e-09	6.58437e-12	1.00098e-09	5.25235e-12	7.98774e-14	5.19593e-09	3.4734e-10	0.00101086	1.53731e-05	0.00126722	0.0668485		144.583	144.583		0.629989	0.0012378	0.165351	7.35563
223	2022-03-11 13:51:02	8730141	2.16397e-11	3.55977e-11	5.19731e-09	6.61877e-12	9.89693e-10	1.40225e-11	7.11954e-14	5.17132e-09	3.43423e-10	0.00271159	1.37673e-05	0.0012799	0.0664092		145.267	145.267		0.631261	0.00124775	0.166221	7.40116
224	2022-03-11 13:51:43	8771239	1.94359e-11	4.51909e-11	5.17307e-09	6.3683e-12	9.885e-10	1.25945e-11	9.03818e-14	5.1472e-09	3.43009e-10	0.00244685	1.75594e-05	0.00123723	0.06664		145.95	145.95		0.633023	0.00125846	0.167081	7.44662
225	2022-03-11 13:52:24	8812336	1.29859e-11	3.00692e-11	5.10236e-09	6.1189e-12	9.627e-10	8.41486e-12	6.01384e-14	5.07685e-09	3.34057e-10	0.0016575	1.18456e-05	0.00120526	0.0658001		146.633	146.633		0.634425	0.0012685	0.167916	7.49187
226	2022-03-11 13:53:05	8853434	1.69097e-11	3.12568e-11	5.08471e-09	6.2694e-12	9.58743e-10	1.09575e-11	6.25136e-14	5.05929e-09	3.32684e-10	0.00216582	1.23562e-05	0.00123919	0.0657571		147.317	147.317		0.635732	0.00127677	0.168751	7.53682
227	2022-03-11 13:53:46	8894531	3.93019e-11	3.35091e-11	5.11666e-09	5.04175e-12	9.27307e-10	2.54676e-11	6.70182e-14	5.09108e-09	3.21776e-10	0.00500241	1.31639e-05	0.000990311	0.0632038		148	148		0.638181	0.00128549	0.169513	7.58088
228	2022-03-11 13:54:26	8934589	3.76679e-11	4.18328e-11	4.67154e-09	6.30917e-12	9.30186e-10	2.44088e-11	8.36656e-14	4.64818e-09	3.22775e-10	0.00525126	1.79996e-05	0.00135734	0.069441		148.667	148.667		0.641599	0.00129588	0.170295	7.62509
229	2022-03-11 13:55:07	8975686	-1.32439e-11	4.75047e-11	5.13097e-09	5.9125e-12	9.2935e-10	-8.58205e-12	9.50094e-14	5.10532e-09	3.22484e-10	-0.001681	1.86099e-05	0.00115811	0.0631664		149.35	149.35		0.642819	0.00130839	0.171155	7.6704
230	2022-03-11 13:55:48	9016784	1.41039e-11	2.74585e-11	1.67431e-07	6.0544e-12	9.12786e-10	9.13933e-12	5.4917e-14	1.66594e-07	3.16737e-10	5.48599e-05	3.29646e-07	3.63423e-05	0.00190125		150.033	150.033		0.642263	0.00131486	0.171563	7.69263
231	2022-03-11 13:56:31	9059422	1.68774e-12	2.23907e-11	3.57616e-07	5.15355e-12	7.99414e-10	1.09366e-12	4.47814e-14	3.55828e-07	2.77397e-10	3.07355e-06	1.25851e-07	1.44833e-05	0.000779581		150.75	150.75		0.642284	0.00131502	0.171581	7.69359
232	2022-03-11 13:57:09	9097919	4.25699e-12	1.32992e-11	4.03393e-07	4.49887e-12	7.04632e-10	2.75853e-12	2.65984e-14	4.01376e-07	2.44507e-10	6.87268e-06	6.6268e-08	1.12086e-05	0.000609173		151.383	151.383		0.642287	0.00131508	0.171589	7.69403
233	2022-03-11 13:57:48	9136416	1.28001e-09	1.86742e-11	3.99092e-07	1.70233e-10	4.48621e-09	8.29446e-10	3.73484e-14	3.97097e-07	1.55671e-09	0.00208878	9.40537e-08	0.000428694	0.00392024		152.033	152.033		0.642968	0.00131513	0.171732	7.69551
234	2022-03-11 13:58:32	9180245	1.01251e-08	1.92988e-11	3.6747e-07	2.84765e-10	4.03965e-09	6.56106e-09	3.85976e-14	3.65633e-07	1.40176e-09	0.0179444	1.05564e-07	0.000778828	0.00383379		152.767	152.767		0.650313	0.00131521	0.172175	7.69835
235	2022-03-11 13:59:05	9213662	1.19956e-08	2.80932e-11	3.59855e-07	2.75479e-10	2.82536e-09	7.77315e-09	5.61864e-14	3.58056e-07	9.804e-10	0.0217093	1.56921e-07	0.000769375	0.00273812		153.317	153.317		0.661218	0.00131528	0.172601	7.70016
236	2022-03-11 13:59:35	9243429	1.24262e-08	2.27694e-11	3.55913e-07	2.63637e-10	2.16488e-09	8.05218e-09	4.55388e-14	3.54133e-07	7.51213e-10	0.0227377	1.28592e-07	0.000744457	0.00212127		153.817	153.817		0.67233	0.00131535	0.172979	7.70137
237	2022-03-11 14:00:05	9273196	1.02971e-08	3.56796e-11	3.46059e-07	1.28367e-10	1.53811e-09	6.67252e-09	7.13592e-14	3.44329e-07	5.33724e-10	0.0193783	2.07242e-07	0.000372804	0.00155004		154.317	154.317		0.682859	0.00131544	0.173259	7.70229
238	2022-03-11 14:00:37	9305552	2.95591e-09	3.10316e-11	3.35758e-07	5.66525e-11	1.27032e-09	1.91543e-09	6.20632e-14	3.34079e-07	4.40801e-10	0.00573346	1.85774e-07	0.000169578	0.00131945		154.85	154.85		0.689556	0.00131554	0.173403	7.70305
239	2022-03-11 14:01:09	9337419	1.19712e-09	2.16228e-11	3.7168e-07	2.94818e-11	1.0858e-09	7.75734e-10	4.32456e-14	3.69822e-07	3.76773e-10	0.00209759	1.16936e-07	7.9719e-05	0.0010188		155.383	155.383		0.691644	0.00131562	0.17347	7.70368
240	2022-03-11 14:01:48	9376827	4.40125e-10	1.5654e-11	3.29576e-07	1.75633e-11	1.56259e-09	2.85201e-10	3.1308e-14	3.27928e-07	5.42219e-10	0.000869706	9.54721e-08	5.35584e-05	0.00165347		156.033	156.033		0.692608	0.00131569	0.173513	7.70455
241	2022-03-11 14:02:27	9415324	1.68634e-10	2.86973e-11	7.15859e-08	1.79084e-11	2.00483e-09	1.09275e-10	5.73946e-14	7.1228e-08	6.95676e-10	0.00153416	8.05787e-07	0.000251424	0.00976689		156.683	156.683		0.693389	0.00131598	0.173612	7.70826
242	2022-03-11 14:03:06	9454841	6.72196e-11	2.52266e-11	1.83213e-08	1.62475e-11	1.86109e-09	4.35583e-11	5.04532e-14	1.82297e-08	6.45798e-10	0.00238941	2.76764e-06	0.000891266	0.0354256		157.333	157.333		0.694665	0.00131714	0.173983	7.72295
243	2022-03-11 14:03:45	9493839	4.39889e-11	2.9158e-11	8.28482e-09	1.452e-11	1.67669e-09	2.85048e-11	5.8316e-14	8.2434e-09	5.81811e-10	0.0034579	7.07427e-06	0.00176141	0.0705791		157.983	157.983		0.696565	0.00132034	0.174846	7.7574
244	2022-03-11 14:04:24	9532836	4.50424e-12	5.91556e-11	6.16616e-09	1.25151e-11	1.51976e-09	2.91875e-12	1.18311e-13	6.13533e-09	5.27357e-10	0.000475728	1.92836e-05	0.00203984	0.0859541		158.633	158.633		0.697843	0.00132891	0.176081	7.80827
245	2022-03-11 14:05:06	9574954	2.94979e-11	3.6171e-11	5.71892e-09	1.18572e-11	1.38922e-09	1.91146e-11	7.2342e-14	5.69033e-09	4.82059e-10	0.00335915	1.27132e-05	0.00208375	0.0847156		159.333	159.333		0.699186	0.00134011	0.177524	7.868
246	2022-03-11 14:05:48	9616051	3.29056e-11	3.33147e-11	5.55879e-09	1.01308e-11	1.32624e-09	2.13228e-11	6.66294e-14	5.531e-09	4.60205e-10	0.00385515	1.20465e-05	0.00183164	0.0832048		160.033	160.033		0.701711	0.00134877	0.178895	7.92678
247	2022-03-11 14:06:29	9657149	2.64019e-11	4.42285e-11	5.46538e-09	9.54278e-12	1.23937e-09	1.71084e-11	8.8457e-14	5.43805e-09	4.30061e-10	0.00314606	1.62663e-05	0.00175482	0.0790837		160.717	160.717		0.704103	0.00135845	0.18012	7.98222
248	2022-03-11 14:07:10	9698246	2.60042e-11	3.45432e-11	5.36653e-09	9.07515e-12	1.18729e-09	1.68507e-11	6.90864e-14	5.3397e-09	4.1199e-10	0.00315574	1.29383e-05	0.00169956	0.077156		161.4	161.4		0.706256	0.00136843	0.1813	8.03561
249	2022-03-11 14:07:51	9739344	2.84122e-11	2.87485e-11	5.31218e-09	8.17968e-12	1.14579e-09	1.84111e-11	5.7497e-14	5.28562e-09	3.97589e-10	0.00348324	1.0878e-05	0.00154753	0.0752209		162.083	162.083		0.708524	0.00137656	0.18241	8.08767
250	2022-03-11 14:08:32	9780441	2.71544e-11	3.84747e-11	5.22989e-09	7.8948e-12	1.09719e-09	1.75961e-11	7.69494e-14	5.20374e-09	3.80725e-10	0.00338142	1.47873e-05	0.00151714	0.0731637		162.767	162.767		0.71087	0.00138533	0.183457	8.13837
251	2022-03-11 14:09:13	9821539	1.83179e-11	3.28539e-11	5.1922e-09	7.50565e-12	1.06876e-09	1.187e-11	6.57078e-14	5.16624e-09	3.7086e-10	0.00229761	1.27187e-05	0.00145283	0.0717852		163.45	163.45		0.71281	0.00139473	0.184472	8.18789
252	2022-03-11 14:09:54	9862636	3.01322e-11	3.25775e-11	5.20565e-09	6.92085e-12	1.04861e-09	1.95257e-11	6.5155e-14	5.17962e-09	3.63868e-10	0.00376971	1.25791e-05	0.00133617	0.0702499		164.133	164.133		0.714883	0.00140337	0.185424	8.23642
253	2022-03-11 14:10:35	9903734	2.60149e-11	3.4789e-11	5.17972e-09	6.97782e-12	1.02269e-09	1.68577e-11	6.9578e-14	5.15382e-09	3.54873e-10	0.0032709	1.35003e-05	0.00135391	0.0688564		164.817	164.817		0.717288	0.00141228	0.186344	8.28395
254	2022-03-11 14:11:16	9944831	2.60472e-11	3.34272e-11	5.1682e-09	6.7166e-12	1.01369e-09	1.68786e-11	6.68544e-14	5.14236e-09	3.5175e-10	0.00328227	1.30007e-05	0.00130613	0.0684025		165.5	165.5		0.719527	0.00142134	0.187252	8.33084
255	2022-03-11 14:11:57	9985929	9.06223e-12	3.20144e-11	5.13017e-09	6.12212e-12	9.85493e-10	5.87233e-12	6.40288e-14	5.10452e-09	3.41966e-10	0.00115042	1.25436e-05	0.00119935	0.0669928		166.183	166.183		0.721042	0.00143007	0.188108	8.3771
256	2022-03-11 14:12:39	10027026	1.50499e-13	3.06323e-11	5.15033e-09	6.17695e-12	9.639e-10	9.75234e-14	6.12646e-14	5.12458e-09	3.34473e-10	1.90305e-05	1.19551e-05	0.00120536	0.0652685		166.883	166.883		0.721451	0.00143864	0.18895	8.4234
257	2022-03-11 14:13:20	10068124	1.61464e-11	3.80549e-11	5.15477e-09	5.934e-12	9.65936e-10	1.04629e-11	7.61098e-14	5.129e-09	3.3518e-10	0.00203994	1.48391e-05	0.00115695	0.06535		167.567	167.567		0.722155	0.00144779	0.189757	8.46802
258	2022-03-11 14:14:01	10109221	6.79398e-12	3.36832e-11	5.1415e-09	5.9641e-12	9.4375e-10	4.4025e-12	6.73664e-14	5.11579e-09	3.27481e-10	0.00086057	1.31683e-05	0.00116582	0.0640138		168.25	168.25		0.723146	0.00145736	0.190551	8.51222
259	2022-03-11 14:14:42	10150319	1.69527e-11	3.08268e-11	5.14752e-09	4.13875e-12	9.36429e-10	1.09853e-11	6.16536e-14	5.12178e-09	3.24941e-10	0.00214483	1.20375e-05	0.000808068	0.0634429		168.933	168.933		0.724173	0.00146598	0.191225	8.55577
260	2022-03-11 14:15:23	10191416	2.95624e-11	2.69364e-11	4.66937e-09	6.12212e-12	9.24914e-10	1.91564e-11	5.38728e-14	4.64602e-09	3.20945e-10	0.00412319	1.15955e-05	0.00131771	0.0690795		169.617	169.617		0.726314	0.00147405	0.191952	8.60105
261	2022-03-11 14:16:04	10232514	1.94574e-11	3.09702e-11	5.06981e-09	5.54377e-12	9.14357e-10	1.26084e-11	6.19404e-14	5.04446e-09	3.17282e-10	0.00249945	1.22789e-05	0.00109898	0.0628971		170.3	170.3		0.728577	0.00148221	0.192777	8.64614
262	2022-03-11 14:16:45	10273611	2.64987e-11	2.56361e-11	1.41452e-07	6.18125e-12	9.35221e-10	1.71712e-11	5.12722e-14	1.40745e-07	3.24522e-10	0.000122002	3.64292e-07	4.39182e-05	0.00230575		170.983	170.983		0.729473	0.00148653	0.193168	8.66842
263	2022-03-11 14:17:28	10316249	1.15024e-11	2.3138e-11	3.51524e-07	5.01487e-12	7.9965e-10	7.45356e-12	4.6276e-14	3.49766e-07	2.77479e-10	2.13101e-05	1.32305e-07	1.43378e-05	0.000793325		171.7	171.7		0.729524	0.00148671	0.193189	8.66953
264	2022-03-11 14:18:06	10354746	4.24624e-12	3.63656e-11	3.99451e-07	4.47522e-12	7.2035e-10	2.75156e-12	7.27312e-14	3.97454e-07	2.49961e-10	6.92298e-06	1.82993e-07	1.12597e-05	0.000628907		172.333	172.333		0.729533	0.00148681	0.193197	8.66998
265	2022-03-11 14:18:45	10393244	5.36574e-10	2.38342e-11	3.98376e-07	1.53552e-10	4.48849e-09	3.477e-10	4.76684e-14	3.96384e-07	1.55751e-09	0.000877179	1.20258e-07	0.000387382	0.00392928		172.983	172.983		0.72982	0.0014869	0.193326	8.67146
266	2022-03-11 14:19:29	10437072	9.73429e-09	2.57078e-11	3.66484e-07	2.80284e-10	4.19682e-09	6.30782e-09	5.14156e-14	3.64652e-07	1.4563e-09	0.0172982	1.40999e-07	0.000768635	0.00399367		173.717	173.717		0.736484	0.001487	0.19375	8.67437
267	2022-03-11 14:20:02	10470489	1.18135e-08	2.45713e-11	3.59676e-07	2.74273e-10	2.87239e-09	7.65515e-09	4.91426e-14	3.57878e-07	9.96719e-10	0.0213904	1.37317e-07	0.000766388	0.00278508		174.267	174.267		0.747124	0.00148708	0.194172	8.67623
268	2022-03-11 14:20:32	10500256	1.23208e-08	2.37523e-11	3.56003e-07	2.63488e-10	2.19188e-09	7.98388e-09	4.75046e-14	3.54223e-07	7.60582e-10	0.0225391	1.34109e-07	0.000743848	0.00214719		174.767	174.767		0.758106	0.00148714	0.19455	8.67746
269	2022-03-11 14:21:02	10530022	1.01661e-08	3.12261e-11	3.67738e-07	1.33305e-10	1.55659e-09	6.58763e-09	6.24522e-14	3.65899e-07	5.40137e-10	0.0180039	1.70681e-07	0.000364322	0.00147619		175.267	175.267		0.768242	0.00148722	0.194827	8.67837
270	2022-03-11 14:21:34	10562379	3.09318e-09	2.34759e-11	3.33249e-07	5.72437e-11	1.25569e-09	2.00438e-09	4.69518e-14	3.31583e-07	4.35724e-10	0.00604489	1.41599e-07	0.000172638	0.00131407		175.8	175.8		0.774655	0.0014873	0.19497	8.67911
271	2022-03-11 14:22:06	10594246	1.19164e-09	2.9117e-11	3.67112e-07	2.97452e-11	1.07764e-09	7.72183e-10	5.8234e-14	3.65276e-07	3.73941e-10	0.00211397	1.59424e-07	8.1432e-05	0.00102372		176.333	176.333		0.776831	0.00148738	0.195038	8.67974
272	2022-03-11 14:22:45	10633653	4.43275e-10	1.28488e-11	3.54033e-07	1.69226e-11	1.44621e-09	2.87242e-10	2.56976e-14	3.52263e-07	5.01835e-10	0.00081542	7.29501e-08	4.80397e-05	0.0014246		176.983	176.983		0.777783	0.00148746	0.19508	8.68053
273	2022-03-11 14:23:24	10672151	1.52714e-10	2.95164e-11	8.25957e-08	1.71527e-11	1.98875e-09	9.89587e-11	5.90328e-14	8.21827e-08	6.90096e-10	0.00120413	7.18312e-07	0.000208714	0.0083971		177.633	177.633		0.778439	0.00148772	0.195163	8.68372
274	2022-03-11 14:24:02	10710649	6.85526e-11	2.19197e-11	2.01527e-08	1.58293e-11	1.8305e-09	4.44221e-11	4.38394e-14	2.00519e-08	6.35183e-10	0.00221535	2.18629e-06	0.000789415	0.0316769		178.267	178.267		0.779522	0.00148864	0.195479	8.69642
275	2022-03-11 14:24:42	10750166	4.56121e-11	2.34861e-11	8.69233e-09	1.45286e-11	1.66554e-09	2.95566e-11	4.69722e-14	8.64887e-09	5.77942e-10	0.0034174	5.43102e-06	0.00167983	0.0668229		178.933	178.933		0.7814	0.00149118	0.196302	8.72925
276	2022-03-11 14:25:21	10789164	5.23309e-11	3.29972e-11	6.26848e-09	1.25538e-11	1.51364e-09	3.39104e-11	6.59944e-14	6.23714e-09	5.25233e-10	0.00543686	1.05809e-05	0.00201275	0.0842106		179.583	179.583		0.784277	0.00149638	0.197503	8.77833
277	2022-03-11 14:26:03	10831282	4.33439e-11	2.72947e-11	5.72168e-09	1.1324e-11	1.40709e-09	2.80868e-11	5.45894e-14	5.69307e-09	4.8826e-10	0.00493351	9.58874e-06	0.00198908	0.0857639		180.283	180.283		0.787907	0.00150344	0.198903	8.83783
278	2022-03-11 14:26:44	10872379	1.21044e-11	3.45842e-11	5.53291e-09	1.04285e-11	1.32011e-09	7.84365e-12	6.91684e-14	5.50525e-09	4.58078e-10	0.00142476	1.25641e-05	0.00189428	0.0832076		180.967	180.967		0.790079	0.00151101	0.20023	8.89556
279	2022-03-11 14:27:25	10913476	9.67498e-12	3.94268e-11	5.43373e-09	9.36648e-12	1.24729e-09	6.26939e-12	7.88536e-14	5.40656e-09	4.3281e-10	0.00115959	1.45848e-05	0.00173243	0.0800527		181.65	181.65		0.790962	0.00152028	0.201469	8.95134
280	2022-03-11 14:28:06	10954574	2.69502e-11	3.45739e-11	5.34738e-09	8.55378e-12	1.17566e-09	1.74637e-11	6.91478e-14	5.32064e-09	4.07954e-10	0.00328226	1.29961e-05	0.00160766	0.0766738		182.333	182.333		0.79248	0.00152971	0.20261	9.00489
281	2022-03-11 14:28:47	10995671	2.10699e-11	2.7479e-11	5.29534e-09	8.43015e-12	1.12827e-09	1.36533e-11	5.4958e-14	5.26886e-09	3.9151e-10	0.00259132	1.04307e-05	0.00159999	0.0743063		183.017	183.017		0.794487	0.00153771	0.203706	9.05647
282	2022-03-11 14:29:28	11036769	1.75869e-11	3.29153e-11	5.29239e-09	7.76042e-12	1.10979e-09	1.13963e-11	6.58306e-14	5.26593e-09	3.85097e-10	0.00216416	1.25012e-05	0.0014737	0.07313		183.7	183.7		0.796111	0.00154555	0.204756	9.10685
283	2022-03-11 14:30:09	11077866	2.18762e-11	3.71642e-11	5.25508e-09	7.3057e-12	1.04369e-09	1.41758e-11	7.43284e-14	5.2288e-09	3.6216e-10	0.00271109	1.42152e-05	0.0013972	0.0692626		184.383	184.383		0.797777	0.00155467	0.205737	9.1555
284	2022-03-11 14:30:50	11118964	2.62192e-11	4.37472e-11	5.19622e-09	7.3057e-12	1.03049e-09	1.699e-11	8.74944e-14	5.17024e-09	3.5758e-10	0.00328612	1.69227e-05	0.00141303	0.0691612		185.067	185.067		0.799826	0.00156531	0.206698	9.20279
285	2022-03-11 14:31:32	11160061	2.18332e-11	3.80447e-11	5.15393e-09	7.15197e-12	1.00829e-09	1.41479e-11	7.60894e-14	5.12816e-09	3.49877e-10	0.00275887	1.48376e-05	0.00139465	0.0682265		185.767	185.767		0.801942	0.00157643	0.20768	9.25088
286	2022-03-11 14:32:13	11201159	1.65657e-11	2.27797e-11	5.14622e-09	6.5876e-12	9.84421e-10	1.07346e-11	4.55594e-14	5.12049e-09	3.41594e-10	0.0020964	8.89747e-06	0.00128652	0.0667112		186.45	186.45		0.803601	0.00158454	0.208596	9.29698
287	2022-03-11 14:32:54	11242256	1.91027e-11	2.90966e-11	5.12134e-09	6.36185e-12	9.63057e-10	1.23785e-11	5.81932e-14	5.09573e-09	3.34181e-10	0.0024292	1.142e-05	0.00124847	0.0655805		187.133	187.133		0.805147	0.00159148	0.209462	9.34218
288	2022-03-11 14:33:35	11283354	1.21259e-11	3.86999e-11	5.10385e-09	6.81872e-12	9.44821e-10	7.85758e-12	7.73998e-14	5.07833e-09	3.27853e-10	0.00154728	1.52412e-05	0.00134271	0.0645592		187.817	187.817		0.806506	0.00160059	0.210348	9.38664
289	2022-03-11 14:34:16	11324451	5.93399e-12	2.67623e-11	5.0756e-09	6.2565e-12	9.37507e-10	3.84523e-12	5.35246e-14	5.05022e-09	3.25315e-10	0.000761397	1.05985e-05	0.00123886	0.064416		188.5	188.5		0.807294	0.00160942	0.21123	9.43071
290	2022-03-11 14:34:57	11365549	1.84792e-11	3.26491e-11	5.08477e-09	6.0888e-12	9.22271e-10	1.19745e-11	6.52982e-14	5.05935e-09	3.20028e-10	0.00236681	1.29065e-05	0.00120348	0.0632548		189.183	189.183		0.808363	0.00161745	0.212064	9.47433
291	2022-03-11 14:35:38	11406646	2.29619e-11	3.77272e-11	5.09475e-09	6.03505e-12	9.15914e-10	1.48793e-11	7.54544e-14	5.06928e-09	3.17822e-10	0.00293519	1.48846e-05	0.00119052	0.0626958		189.867	189.867		0.810175	0.00162694	0.212882	9.51736
292	2022-03-11 14:36:19	11447744	1.45124e-11	1.78347e-11	4.66006e-09	6.21565e-12	9.06671e-10	9.40404e-12	3.56694e-14	4.63676e-09	3.14615e-10	0.00202815	7.69274e-06	0.00134052	0.0678523		190.55	190.55		0.811871	0.00163466	0.213747	9.56197
293	2022-03-11 14:37:00	11488841	1.86189e-11	3.9908e-11	5.00837e-09	5.59752e-12	8.81721e-10	1.2065e-11	7.9816e-14	4.98333e-09	3.05957e-10	0.00242108	1.60166e-05	0.00112325	0.0613962		191.233	191.233		0.813391	0.00164276	0.214589	9.60613
294	2022-03-11 14:37:41	11529939	2.85842e-11	2.4039e-11	1.06783e-07	5.88455e-12	9.52621e-10	1.85226e-11	4.8078e-14	1.06249e-07	3.30559e-10	0.000174331	4.52503e-07	5.53845e-05	0.00311117		191.917	191.917		0.814278	0.00164839	0.214991	9.62817
295	2022-03-11 14:38:24	11572577	3.54749e-12	1.3678e-11	3.27784e-07	5.22772e-12	8.00971e-10	2.29877e-12	2.7356e-14	3.26145e-07	2.77937e-10	7.04832e-06	8.38768e-08	1.60288e-05	0.000852188		192.633	192.633		0.814343	0.00164858	0.215017	9.62959
296	2022-03-11 14:39:03	11611074	7.03048e-12	2.4684e-11	3.83058e-07	4.77515e-12	7.00554e-10	4.55575e-12	4.9368e-14	3.81143e-07	2.43092e-10	1.19529e-05	1.29526e-07	1.25285e-05	0.000637798		193.283	193.283		0.814349	0.00164865	0.215026	9.63007
297	2022-03-11 14:39:41	11649571	8.01841e-11	3.40723e-11	3.89238e-07	1.19308e-10	3.86532e-09	5.19593e-11	6.81446e-14	3.87292e-07	1.34127e-09	0.000134161	1.75952e-07	0.000308057	0.00346319		193.917	193.917		0.814395	0.00164874	0.215128	9.63137
298	2022-03-11 14:40:25	11693400	9.03234e-09	3.4881e-11	3.63259e-07	2.71799e-10	4.22406e-09	5.85296e-09	6.9762e-14	3.61443e-07	1.46575e-09	0.0161933	1.9301e-07	0.000751984	0.00405527		194.65	194.65		0.820382	0.00164888	0.215516	9.63413
299	2022-03-11 14:40:58	11726817	1.16053e-08	3.13591e-11	3.59049e-07	2.72323e-10	2.97473e-09	7.52023e-09	6.27182e-14	3.57254e-07	1.03223e-09	0.0210501	1.75556e-07	0.000762268	0.00288935		195.2	195.2		0.830624	0.00164898	0.215933	9.63604
300	2022-03-11 14:41:28	11756584	1.20903e-08	3.40518e-11	3.53137e-07	2.60295e-10	2.23326e-09	7.83451e-09	6.81036e-14	3.51371e-07	7.74941e-10	0.022297	1.93822e-07	0.000740798	0.00220548		195.7	195.7		0.84146	0.00164907	0.216309	9.63731
301	2022-03-11 14:41:58	11786351	1.10718e-08	1.8838e-11	3.54212e-07	1.59735e-10	1.63937e-09	7.17453e-09	3.7676e-14	3.52441e-07	5.68861e-10	0.0203567	1.069e-07	0.000453225	0.00161406		196.2	196.2		0.852124	0.00164915	0.216607	9.63827
302	2022-03-11 14:42:30	11818707	2.01324e-09	2.5503e-11	1.51664e-07	5.01853e-11	1.17998e-09	1.30458e-09	5.1006e-14	1.50906e-07	4.09453e-10	0.008645	3.37999e-07	0.000332561	0.0027133		196.733	196.733		0.859858	0.00164927	0.216817	9.63942
303	2022-03-11 14:43:02	11850574	1.19398e-09	3.04173e-11	1.57308e-07	3.56631e-11	1.15179e-09	7.73699e-10	6.08346e-14	1.56521e-07	3.99671e-10	0.00494309	3.88666e-07	0.000227848	0.00255346		197.267	197.267		0.863481	0.00164946	0.216966	9.64083
304	2022-03-11 14:43:41	11889982	7.09133e-10	1.89916e-11	1.65102e-07	2.41316e-11	1.08184e-09	4.59518e-10	3.79832e-14	1.64276e-07	3.75398e-10	0.00279722	2.31215e-07	0.000146896	0.00228516		197.917	197.917		0.865997	0.00164966	0.217088	9.6424
305	2022-03-11 14:44:20	11928479	4.32805e-10	4.0553e-11	1.72716e-07	1.68173e-11	1.05136e-09	2.80458e-10	8.1106e-14	1.71852e-07	3.64822e-10	0.00163197	4.71951e-07	9.7859e-05	0.00212288		198.567	198.567		0.867436	0.00164989	0.217168	9.64383
306	2022-03-11 14:44:58	11966976	2.69319e-10	2.86256e-11	1.80152e-07	1.32268e-11	9.92336e-10	1.74519e-10	5.72512e-14	1.79251e-07	3.44341e-10	0.000973598	3.19391e-07	7.37892e-05	0.00192099		199.2	199.2		0.868261	0.00165014	0.217222	9.64511
307	2022-03-11 14:45:37	12005474	1.80685e-10	3.12466e-11	1.86512e-07	1.05661e-11	9.78057e-10	1.17084e-10	6.24932e-14	1.85579e-07	3.39386e-10	0.00063091	3.36746e-07	5.69357e-05	0.00182879		199.85	199.85		0.868783	0.00165035	0.217264	9.64633
308	2022-03-11 14:46:15	12043971	1.46178e-10	3.31406e-11	1.91707e-07	1.23313e-11	1.23157e-09	9.47233e-11	6.62812e-14	1.90748e-07	4.27355e-10	0.000496588	3.4748e-07	6.46469e-05	0.00224041		200.483	200.483		0.86914	0.00165057	0.217303	9.64762
309	2022-03-11 14:46:54	12082469	2.9585e-10	3.28539e-11	1.96008e-07	1.61067e-11	1.27776e-09	1.91711e-10	6.57078e-14	1.95028e-07	4.43383e-10	0.000982991	3.36915e-07	8.25866e-05	0.00227343		201.133	201.133		0.869621	0.00165079	0.217351	9.64909
310	2022-03-11 14:47:32	12120966	3.46826e-10	2.84311e-11	2.02816e-07	1.6369e-11	1.15059e-09	2.24743e-10	5.68622e-14	2.01802e-07	3.99255e-10	0.00111368	2.81772e-07	8.11142e-05	0.00197845		201.767	201.767		0.870285	0.00165099	0.217403	9.65043
311	2022-03-11 14:48:11	12159464	3.30884e-10	1.6944e-11	2.06937e-07	1.44394e-11	1.02137e-09	2.14413e-10	3.3888e-14	2.05902e-07	3.54415e-10	0.00104133	1.64583e-07	7.01274e-05	0.00172128		202.417	202.417		0.870985	0.00165113	0.217452	9.65163
312	2022-03-11 14:48:49	12197961	2.83756e-10	2.24418e-11	2.12402e-07	1.35579e-11	9.26221e-10	1.83874e-10	4.48836e-14	2.1134e-07	3.21399e-10	0.000870038	2.12376e-07	6.41521e-05	0.00152077		203.05	203.05		0.87159	0.00165125	0.217494	9.65266
313	2022-03-11 14:49:28	12236459	2.32769e-10	2.8769e-11	2.18762e-07	1.26387e-11	8.858e-10	1.50834e-10	5.7538e-14	2.17668e-07	3.07373e-10	0.000692955	2.64338e-07	5.80641e-05	0.00141212		203.7	203.7		0.872098	0.00165141	0.217534	9.65361
314	2022-03-11 14:50:06	12274956	2.09549e-10	2.14794e-11	2.23062e-07	1.14218e-11	8.41757e-10	1.35788e-10	4.29588e-14	2.21947e-07	2.9209e-10	0.000611803	1.93555e-07	5.14619e-05	0.00131604		204.333	204.333		0.872511	0.00165155	0.217569	9.65448
315	2022-03-11 14:50:45	12313454	1.62324e-11	3.30791e-11	1.00221e-08	3.05407e-12	1.00961e-09	1.05186e-11	6.61582e-14	9.97199e-09	3.50335e-10	0.00105481	6.6344e-06	0.000306265	0.0351319		204.983	204.983		0.873053	0.00165377	0.217685	9.66632

## Sheet: Integration Data analysis
					Et (ć) integral		CO (ć) integral		EtO (ć) integral		CO2 (ć) integral
Cycle	Start Index	Start Time, min	End Index	End Time, min	Start	End	Start	End	Start	End	Start	End		Conversion %	Selectivity %
1	9	5.68333	13	7.71667	0.0182805	0.0573154	5.20531e-05	5.25105e-05	0.0044744	0.00627811	0.213325	0.226598		17.779	21.3692
2	41	26.5667	45	28.6667	0.109948	0.150534	0.00024435	0.000244714	0.034832	0.0363971	1.43846	1.44546		11.0944	30.9035
3	73	47.5167	77	49.55	0.198416	0.238293	0.000436088	0.000436492	0.060131	0.0616637	2.56552	2.57198		10.6712	32.1751
4	105	68.4333	109	70.5167	0.287221	0.327287	0.000621407	0.000621707	0.0836895	0.0851939	3.64544	3.65169		10.3564	32.5008
5	137	89.4167	141	91.5	0.375888	0.415628	0.000795586	0.000795929	0.105697	0.107174	4.68705	4.69331		10.3948	32.0477
6	169	110.4	173	112.483	0.464719	0.504495	0.000981492	0.00098184	0.12821	0.129657	5.71152	5.71721		9.73446	33.7267
7	201	131.317	205	133.45	0.552894	0.592841	0.00113584	0.00113623	0.149979	0.151453	6.71175	6.71811		10.4342	31.6629
8	234	152.767	238	154.85	0.650313	0.689556	0.00131521	0.00131554	0.172175	0.173403	7.69835	7.70305		8.36212	34.2976
9	266	173.717	270	175.8	0.736484	0.774655	0.001487	0.0014873	0.19375	0.19497	8.67437	8.67911		8.6046	33.9467
10	298	194.65	302	196.733	0.820382	0.859858	0.00164888	0.00164927	0.215516	0.216817	9.63413	9.63942		9.08882	32.9457
Ethylene in 5.4vol%		54000
Reduction time		2	minutes
Cycles		10
Carbon balance		5.48586e-06
