# Supplementary material for: Mechano-synthesis of a AgSrFeO3 catalyst for epoxidation of ethylene in a chemical looping set-up
Source: Royal Society of Chemistry journal article supplement (doi:10.1039/d4ma00485j), 2024-01-01
Supplement: d4ma00485j4.xlsx [file d4ma00485j4.xlsx]

## Sheet: Raw data
Real time	ms	Ethylene mbar	Carbon monoxide mbar	Argon mbar	Ethylene oxide mbar	Carbon dioxide mbar	Corrected Ethylene	Corrected CO	Corrected Ar	Corrected CO2	Ethylene (ć )	CO (ć )	ETO (ć )	CO2 (ć )
2022-03-15 09:43:15	10952	2.33489e-11	-7.56593e-12	5.43238e-09	-3.13577e-11	2.42972e-10	1.51301e-11	-1.51319e-14	5.40522e-09	8.6741e-11	0.00279916	-2.79949e-06	-0.00580138	0.0160476
2022-03-15 09:43:34	29737	1.61894e-11	-7.66831e-12	6.12832e-09	-4.30106e-11	2.24705e-10	1.04907e-11	-1.53366e-14	6.09768e-09	8.02197e-11	0.00172045	-2.51516e-06	-0.0070536	0.0131558
2022-03-15 09:43:50	45671	1.97907e-11	-9.17331e-12	6.40858e-09	-4.27741e-11	2.44032e-10	1.28244e-11	-1.83466e-14	6.37654e-09	8.71194e-11	0.00201118	-2.87721e-06	-0.00670805	0.0136625
2022-03-15 09:44:06	61604	1.54584e-11	-1.78142e-11	6.64036e-09	-4.43651e-11	2.4212e-10	1.0017e-11	-3.56284e-14	6.60716e-09	8.64368e-11	0.00151609	-5.39239e-06	-0.0067147	0.0130823
2022-03-15 09:44:22	77536	4.51499e-13	-1.20604e-11	6.70248e-09	-4.38491e-11	2.51718e-10	2.92571e-13	-2.41208e-14	6.66897e-09	8.98633e-11	4.38706e-05	-3.61687e-06	-0.0065751	0.0134748
2022-03-15 09:44:38	93469	3.13147e-11	-1.19478e-11	4.26942e-08	-3.41204e-11	2.53714e-10	2.02919e-11	-2.38956e-14	4.24807e-08	9.05759e-11	0.000477674	-5.62504e-07	-0.000803197	0.00213216
2022-03-15 09:44:54	109912	1.03049e-10	-1.2255e-11	1.91349e-07	-1.83394e-11	2.3858e-10	6.67758e-11	-2.451e-14	1.90392e-07	8.51731e-11	0.000350727	-1.28734e-07	-9.63243e-05	0.000447356
2022-03-15 09:45:10	125576	6.74561e-11	-1.31661e-11	3.35399e-07	-2.61869e-11	2.26402e-10	4.37116e-11	-2.63322e-14	3.33722e-07	8.08255e-11	0.000130982	-7.89046e-08	-7.84692e-05	0.000242194
2022-03-15 09:45:25	140729	2.45852e-11	-1.20194e-11	3.92733e-07	-3.11964e-11	2.01501e-10	1.59312e-11	-2.40388e-14	3.90769e-07	7.19359e-11	4.07688e-05	-6.15166e-08	-7.98333e-05	0.000184088
2022-03-15 09:45:40	155881	3.64424e-12	-3.24137e-11	4.39405e-07	-4.10326e-11	1.94121e-10	2.36147e-12	-6.48274e-14	4.37208e-07	6.93012e-11	5.40125e-06	-1.48276e-07	-9.38514e-05	0.000158509
2022-03-15 09:45:56	171034	3.62274e-12	-3.36423e-11	4.65116e-07	-3.41956e-11	1.82634e-10	2.34754e-12	-6.72846e-14	4.6279e-07	6.52003e-11	5.07257e-06	-1.45389e-07	-7.389e-05	0.000140885
2022-03-15 09:46:11	186186	-2.02959e-11	-2.62811e-11	4.67266e-07	-3.75174e-11	1.79102e-10	-1.31517e-11	-5.25622e-14	4.6493e-07	6.39394e-11	-2.82876e-05	-1.13054e-07	-8.06948e-05	0.000137525
2022-03-15 09:46:26	201339	-2.04894e-11	-2.48478e-11	4.69684e-07	-2.36284e-11	2.07651e-10	-1.32771e-11	-4.96956e-14	4.67336e-07	7.41314e-11	-2.84103e-05	-1.06338e-07	-5.05598e-05	0.000158626
2022-03-15 09:46:41	216490	3.42234e-09	-5.31356e-12	4.54903e-07	4.27548e-10	3.94371e-10	2.21768e-09	-1.06271e-14	4.52628e-07	1.4079e-10	0.00489955	-2.34787e-08	0.000944589	0.000311051
2022-03-15 09:47:00	235935	1.53623e-08	1.91554e-11	4.45049e-07	6.33614e-10	5.02531e-10	9.95477e-09	3.83108e-14	4.42824e-07	1.79404e-10	0.0224802	8.65148e-08	0.00143085	0.000405135
2022-03-15 09:47:13	248349	1.56807e-08	2.37113e-11	4.17995e-07	6.48535e-10	5.41945e-10	1.01611e-08	4.74226e-14	4.15905e-07	1.93474e-10	0.0244313	1.14023e-07	0.00155933	0.000465189
2022-03-15 09:47:25	260761	1.63621e-08	3.15947e-11	4.20324e-07	6.45235e-10	5.7699e-10	1.06026e-08	6.31894e-14	4.18222e-07	2.05985e-10	0.0253517	1.5109e-07	0.0015428	0.000492526
2022-03-15 09:47:38	273174	1.62754e-08	2.66599e-11	4.2113e-07	6.39355e-10	5.87079e-10	1.05465e-08	5.33198e-14	4.19024e-07	2.09587e-10	0.0251691	1.27247e-07	0.00152582	0.000500179
2022-03-15 09:47:50	285586	1.65065e-08	3.00692e-11	4.18084e-07	6.41343e-10	5.97276e-10	1.06962e-08	6.01384e-14	4.15994e-07	2.13228e-10	0.0257124	1.44566e-07	0.00154171	0.000512574
2022-03-15 09:48:02	297999	1.60772e-08	2.32916e-11	4.11455e-07	6.23907e-10	5.93875e-10	1.0418e-08	4.65832e-14	4.09398e-07	2.12013e-10	0.0254472	1.13785e-07	0.00152396	0.000517867
2022-03-15 09:48:15	310411	1.61202e-08	2.59535e-11	4.06618e-07	6.21187e-10	5.86903e-10	1.04459e-08	5.1907e-14	4.04585e-07	2.09524e-10	0.0258188	1.28297e-07	0.00153537	0.000517875
2022-03-15 09:48:27	322824	1.59213e-08	1.73945e-11	4.0617e-07	6.1262e-10	5.86964e-10	1.0317e-08	3.4789e-14	4.04139e-07	2.09546e-10	0.0255283	8.60817e-08	0.00151586	0.0005185
2022-03-15 09:48:40	335236	1.60147e-08	8.82522e-12	4.03124e-07	6.13157e-10	5.80031e-10	1.03775e-08	1.76504e-14	4.01108e-07	2.07071e-10	0.0258721	4.40042e-08	0.00152866	0.000516247
2022-03-15 09:48:52	347649	1.49417e-08	8.98903e-12	4.07693e-07	5.64632e-10	5.45054e-10	9.68222e-09	1.79781e-14	4.05655e-07	1.94584e-10	0.0238681	4.43186e-08	0.0013919	0.00047968
2022-03-15 09:49:05	360061	1.19021e-08	1.27873e-11	4.26863e-07	3.93169e-10	4.52851e-10	7.71256e-09	2.55746e-14	4.24729e-07	1.61668e-10	0.0181588	6.0214e-08	0.000925694	0.000380638
2022-03-15 09:49:17	372984	6.39149e-09	-8.29284e-12	3.73203e-07	2.45443e-10	4.11424e-10	4.14169e-09	-1.65857e-14	3.71337e-07	1.46878e-10	0.0111534	-4.46648e-08	0.000660971	0.000395539
2022-03-15 09:49:30	385927	4.11737e-09	-7.56593e-12	3.70695e-07	1.67033e-10	3.62689e-10	2.66806e-09	-1.51319e-14	3.68842e-07	1.2948e-10	0.00723361	-4.10254e-08	0.000452858	0.000351045
2022-03-15 09:49:43	398870	2.7081e-09	-6.21451e-12	3.74278e-07	1.11993e-10	3.45136e-10	1.75485e-09	-1.2429e-14	3.72407e-07	1.23214e-10	0.00471218	-3.33749e-08	0.000300728	0.000330858
2022-03-15 09:49:56	411814	1.84763e-09	-1.7845e-11	3.88163e-07	7.98831e-11	3.13054e-10	1.19726e-09	-3.569e-14	3.86222e-07	1.1176e-10	0.00309994	-9.24079e-08	0.000206832	0.000289368
2022-03-15 09:50:09	424755	1.27737e-09	-1.21321e-11	3.9972e-07	7.01973e-11	2.81849e-10	8.27736e-10	-2.42642e-14	3.97721e-07	1.0062e-10	0.00208119	-6.1008e-08	0.000176499	0.000252991
2022-03-15 09:50:23	438739	8.50732e-10	-1.68211e-11	4.1038e-07	3.60339e-11	2.69486e-10	5.51274e-10	-3.36422e-14	4.08328e-07	9.62065e-11	0.00135008	-8.23901e-08	8.82474e-05	0.000235611
2022-03-15 09:50:38	453892	5.67921e-10	-1.76709e-11	4.14233e-07	1.95004e-11	2.55335e-10	3.68013e-10	-3.53418e-14	4.12162e-07	9.11546e-11	0.000892884	-8.57474e-08	4.73125e-05	0.000221162
2022-03-15 09:50:54	469046	4.10961e-10	-1.94523e-11	3.3092e-07	1.22549e-12	2.82279e-10	2.66303e-10	-3.89046e-14	3.29265e-07	1.00774e-10	0.000808778	-1.18156e-07	3.72189e-06	0.000306056
2022-03-15 09:51:09	484199	3.23563e-10	-2.6445e-11	1.90991e-07	2.27899e-12	2.96484e-10	2.09669e-10	-5.289e-14	1.90036e-07	1.05845e-10	0.00110331	-2.78316e-07	1.19924e-05	0.000556972
2022-03-15 09:51:24	499350	2.67018e-10	-2.22269e-11	1.04543e-07	-3.21424e-12	3.00277e-10	1.73028e-10	-4.44538e-14	1.0402e-07	1.07199e-10	0.0016634	-4.27357e-07	-3.09001e-05	0.00103056
2022-03-15 09:51:39	514504	2.04174e-10	-2.07321e-11	5.57587e-08	-1.29429e-11	2.88076e-10	1.32305e-10	-4.14642e-14	5.54799e-08	1.02843e-10	0.00238473	-7.47373e-07	-0.00023329	0.0018537
2022-03-15 09:51:55	530167	1.76235e-10	-1.78859e-11	3.23232e-08	-2.88852e-11	2.89343e-10	1.142e-10	-3.57718e-14	3.21616e-08	1.03295e-10	0.00355083	-1.11225e-06	-0.000898127	0.00321177
2022-03-15 09:52:10	545571	1.47747e-10	-2.15409e-11	2.0104e-08	-1.20292e-11	2.86295e-10	9.57401e-11	-4.30818e-14	2.00035e-08	1.02207e-10	0.00478617	-2.15372e-06	-0.000601355	0.00510948
2022-03-15 09:52:25	560974	1.24162e-10	-1.86332e-11	1.37062e-08	-2.41337e-11	2.81166e-10	8.0457e-11	-3.72664e-14	1.36377e-08	1.00376e-10	0.00589961	-2.73261e-06	-0.00176964	0.00736022
2022-03-15 09:52:41	576376	1.13853e-10	-1.37394e-11	1.03473e-08	-2.86917e-11	2.69018e-10	7.37767e-11	-2.74788e-14	1.02956e-08	9.60394e-11	0.00716588	-2.66899e-06	-0.0027868	0.00932823
2022-03-15 09:52:56	591779	1.03447e-10	-1.71897e-11	8.59375e-09	-3.58296e-11	2.68972e-10	6.70337e-11	-3.43794e-14	8.55078e-09	9.6023e-11	0.00783948	-4.02062e-06	-0.00419021	0.0112297
2022-03-15 09:53:12	607180	8.92463e-11	-2.67009e-11	7.63303e-09	-2.35209e-11	2.66837e-10	5.78316e-11	-5.34018e-14	7.59486e-09	9.52608e-11	0.00761457	-7.0313e-06	-0.00309695	0.0125428
2022-03-15 09:53:27	622584	8.32371e-11	-1.27566e-11	6.9804e-09	-3.10352e-11	2.69655e-10	5.39376e-11	-2.55132e-14	6.9455e-09	9.62668e-11	0.00776584	-3.67334e-06	-0.00446839	0.0138603
2022-03-15 09:53:44	639027	8.54193e-11	-2.8339e-11	6.66162e-09	-2.90034e-11	2.52862e-10	5.53517e-11	-5.6678e-14	6.62831e-09	9.02717e-11	0.0083508	-8.5509e-06	-0.00437568	0.0136191
2022-03-15 09:53:59	654961	5.93184e-11	-2.69773e-11	6.46338e-09	-3.42709e-11	2.46289e-10	3.84383e-11	-5.39546e-14	6.43106e-09	8.79252e-11	0.00597698	-8.38969e-06	-0.00532896	0.0136719
2022-03-15 09:54:15	670894	6.33711e-11	-2.9117e-11	6.33209e-09	-3.62274e-11	2.6071e-10	4.10645e-11	-5.8234e-14	6.30043e-09	9.30735e-11	0.00651773	-9.24286e-06	-0.00574999	0.0147726
2022-03-15 09:54:31	686827	6.49299e-11	-1.7937e-11	6.25174e-09	-3.55609e-11	2.50605e-10	4.20746e-11	-3.5874e-14	6.22048e-09	8.9466e-11	0.00676388	-5.76708e-06	-0.00571674	0.0143825
2022-03-15 09:54:47	702761	4.73429e-11	-2.0988e-11	6.16942e-09	-4.26881e-11	2.45206e-10	3.06782e-11	-4.1976e-14	6.13857e-09	8.75385e-11	0.00499761	-6.83807e-06	-0.00695408	0.0142604
2022-03-15 09:55:03	718694	5.09979e-11	-2.89021e-11	6.10677e-09	-3.54534e-11	2.43986e-10	3.30466e-11	-5.78042e-14	6.07624e-09	8.7103e-11	0.00543867	-9.51316e-06	-0.00583476	0.014335
2022-03-15 09:55:19	734627	4.14196e-11	-2.66907e-11	6.0509e-09	-4.01941e-11	2.34603e-10	2.68399e-11	-5.33814e-14	6.02065e-09	8.37533e-11	0.00445798	-8.86639e-06	-0.00667604	0.013911
2022-03-15 09:55:35	750561	2.93367e-11	-3.16151e-11	6.01736e-09	-3.51739e-11	2.42972e-10	1.90102e-11	-6.32302e-14	5.98727e-09	8.6741e-11	0.0031751	-1.05608e-05	-0.00587478	0.0144876
2022-03-15 09:55:51	766494	3.15727e-11	-2.37728e-11	5.97027e-09	-3.78721e-11	2.47464e-10	2.04591e-11	-4.75456e-14	5.94042e-09	8.83446e-11	0.00344405	-8.00375e-06	-0.00637533	0.0148718
2022-03-15 09:56:07	782425	3.08202e-11	-2.34964e-11	5.94419e-09	-3.45504e-11	2.29044e-10	1.99715e-11	-4.69928e-14	5.91447e-09	8.17687e-11	0.00337672	-7.9454e-06	-0.00584167	0.0138252
2022-03-15 09:56:23	798359	2.31447e-11	-1.93499e-11	5.92909e-09	-3.72916e-11	2.42988e-10	1.49978e-11	-3.86998e-14	5.89944e-09	8.67467e-11	0.00254223	-6.55991e-06	-0.00632121	0.0147042
2022-03-15 09:56:39	814291	1.84577e-11	-2.6107e-11	5.88878e-09	-4.13014e-11	2.39425e-10	1.19606e-11	-5.2214e-14	5.85934e-09	8.54747e-11	0.00204129	-8.91125e-06	-0.00704882	0.0145878
2022-03-15 09:56:55	830224	1.87049e-11	-2.97007e-11	5.86617e-09	-4.49241e-11	2.34564e-10	1.21208e-11	-5.94014e-14	5.83684e-09	8.37393e-11	0.0020766	-1.0177e-05	-0.00769665	0.0143467
2022-03-15 09:57:11	846157	2.15967e-11	-2.56975e-11	5.84693e-09	-4.53971e-11	2.37866e-10	1.39947e-11	-5.1395e-14	5.8177e-09	8.49182e-11	0.00240553	-8.83425e-06	-0.00780328	0.0145965
2022-03-15 09:57:27	862091	1.75869e-11	-2.87588e-11	5.82993e-09	-6.58328e-11	2.20213e-10	1.13963e-11	-5.75176e-14	5.80078e-09	7.8616e-11	0.00196462	-9.91549e-06	-0.011349	0.0135527
2022-03-15 09:57:43	878024	7.03048e-12	-2.48273e-11	5.8315e-09	-4.62141e-11	2.29451e-10	4.55575e-12	-4.96546e-14	5.80234e-09	8.1914e-11	0.000785157	-8.55768e-06	-0.00796473	0.0141174
2022-03-15 09:57:58	893956	1.24054e-11	-3.18097e-11	5.78824e-09	-5.02239e-11	2.24052e-10	8.0387e-12	-6.36194e-14	5.7593e-09	7.99866e-11	0.00139578	-1.10464e-05	-0.00872049	0.0138882
2022-03-15 09:58:14	909889	4.93424e-12	-1.4753e-11	5.75717e-09	-5.74801e-11	2.25696e-10	3.19739e-12	-2.9506e-14	5.72838e-09	8.05735e-11	0.000558166	-5.15084e-06	-0.0100343	0.0140657
2022-03-15 09:58:30	925821	5.03099e-12	-2.84823e-11	5.7662e-09	-4.34836e-11	2.08035e-10	3.26008e-12	-5.69646e-14	5.73737e-09	7.42685e-11	0.000568219	-9.9287e-06	-0.00757901	0.0129447
2022-03-15 09:58:46	941754	1.59314e-11	-3.38368e-11	5.75309e-09	-5.11376e-11	2.20804e-10	1.03235e-11	-6.76736e-14	5.72432e-09	7.8827e-11	0.00180345	-1.18221e-05	-0.00893339	0.0137705
2022-03-15 09:59:02	957686	2.68749e-12	-3.36013e-11	5.72517e-09	-5.43196e-11	2.09647e-10	1.74149e-12	-6.72026e-14	5.69654e-09	7.4844e-11	0.000305711	-1.17971e-05	-0.00953554	0.0131385
2022-03-15 09:59:18	973619	6.42849e-12	-3.10726e-11	5.71988e-09	-5.78779e-11	2.16535e-10	4.16566e-12	-6.21452e-14	5.69128e-09	7.7303e-11	0.000731937	-1.09194e-05	-0.0101696	0.0135827
2022-03-15 09:59:34	989551	-1.81674e-12	-3.2987e-11	5.69739e-09	-5.02454e-11	2.1212e-10	-1.17725e-12	-6.5974e-14	5.6689e-09	7.57268e-11	-0.000207668	-1.16379e-05	-0.00886334	0.0133583
2022-03-15 09:59:50	1005484	1.79847e-11	-2.45816e-11	5.70067e-09	-4.67409e-11	2.07497e-10	1.16541e-11	-4.91632e-14	5.67217e-09	7.40764e-11	0.00205461	-8.66745e-06	-0.0082404	0.0130596
2022-03-15 10:00:06	1021417	1.36524e-12	-2.39366e-11	5.69294e-09	-5.09441e-11	2.19084e-10	8.84676e-13	-4.78732e-14	5.66448e-09	7.8213e-11	0.00015618	-8.45148e-06	-0.00899361	0.0138076
2022-03-15 10:00:22	1037351	1.10724e-12	-2.65269e-11	5.68105e-09	-4.95896e-11	2.06215e-10	7.17492e-13	-5.30538e-14	5.65264e-09	7.36188e-11	0.00012693	-9.38566e-06	-0.00877281	0.0130238
2022-03-15 10:00:38	1053284	2.04249e-13	-2.53699e-11	5.67821e-09	-5.02024e-11	2.24076e-10	1.32353e-13	-5.07398e-14	5.64982e-09	7.99951e-11	2.34261e-05	-8.98078e-06	-0.00888567	0.0141589
2022-03-15 10:00:54	1069217	5.34274e-12	-3.40313e-11	5.66228e-09	-5.74694e-11	2.10016e-10	3.4621e-12	-6.80626e-14	5.63397e-09	7.49757e-11	0.000614504	-1.20808e-05	-0.0102005	0.0133078
2022-03-15 10:01:10	1085151	6.26724e-12	-3.5178e-11	5.67283e-09	-4.77621e-11	2.29888e-10	4.06117e-12	-7.0356e-14	5.64447e-09	8.207e-11	0.000719496	-1.24646e-05	-0.00846176	0.0145399
2022-03-15 10:01:26	1101084	-9.06223e-12	-3.14207e-11	5.64213e-09	-4.34191e-11	2.14554e-10	-5.87233e-12	-6.28414e-14	5.61392e-09	7.65958e-11	-0.00104603	-1.11939e-05	-0.00773419	0.0136439
2022-03-15 10:01:42	1117016	1.54799e-12	-2.44383e-11	5.64036e-09	-4.98046e-11	2.09018e-10	1.0031e-12	-4.88766e-14	5.61216e-09	7.46194e-11	0.000178737	-8.70906e-06	-0.00887441	0.013296
2022-03-15 10:01:57	1132949	-7.73998e-12	-3.94268e-11	5.6572e-09	-4.88371e-11	2.03274e-10	-5.01551e-12	-7.88536e-14	5.62891e-09	7.25688e-11	-0.000891026	-1.40087e-05	-0.00867611	0.0128922
2022-03-15 10:02:13	1148882	1.16099e-12	-2.26466e-11	5.62989e-09	-5.25244e-11	2.0987e-10	7.52322e-13	-4.52932e-14	5.60174e-09	7.49236e-11	0.000134301	-8.08556e-06	-0.00937644	0.0133751
2022-03-15 10:02:29	1164816	-8.58923e-12	-2.78783e-11	5.63382e-09	-6.23714e-11	2.13571e-10	-5.56582e-12	-5.57566e-14	5.60565e-09	7.62448e-11	-0.000992895	-9.9465e-06	-0.0111265	0.0136014
2022-03-15 10:02:45	1180749	2.64449e-12	-2.69466e-11	5.61424e-09	-5.00734e-11	2.04941e-10	1.71363e-12	-5.38932e-14	5.58617e-09	7.31639e-11	0.000306763	-9.64761e-06	-0.00896382	0.0130973
2022-03-15 10:03:01	1196681	9.45998e-13	-2.49399e-11	5.61056e-09	-6.13394e-11	2.00986e-10	6.13007e-13	-4.98798e-14	5.58251e-09	7.1752e-11	0.000109808	-8.93502e-06	-0.0109878	0.012853
2022-03-15 10:03:17	1212614	-3.54749e-12	-3.75634e-11	5.61814e-09	-5.97591e-11	1.99781e-10	-2.29877e-12	-7.51268e-14	5.59005e-09	7.13218e-11	-0.000411226	-1.34394e-05	-0.0106903	0.0127587
2022-03-15 10:03:33	1228547	-8.10548e-12	-2.95983e-11	5.59746e-09	-5.98129e-11	2.13433e-10	-5.25235e-12	-5.91966e-14	5.56947e-09	7.61956e-11	-0.000943061	-1.06288e-05	-0.0107394	0.0136809
2022-03-15 10:03:49	1244480	-8.67523e-12	-3.22909e-11	5.58927e-09	-5.49754e-11	2.21687e-10	-5.62155e-12	-6.45818e-14	5.56132e-09	7.91423e-11	-0.00101083	-1.16127e-05	-0.00988531	0.0142308
2022-03-15 10:04:05	1260414	-1.21689e-11	-3.16253e-11	5.54214e-09	-5.01056e-11	1.93937e-10	-7.88545e-12	-6.32506e-14	5.51443e-09	6.92355e-11	-0.00142997	-1.147e-05	-0.00908627	0.0125553
2022-03-15 10:04:21	1276347	-1.54799e-12	-3.41951e-11	5.21308e-09	-5.33199e-11	2.0223e-10	-1.0031e-12	-6.83902e-14	5.18701e-09	7.21961e-11	-0.000193386	-1.31849e-05	-0.0102795	0.0139186
2022-03-15 10:04:37	1292281	-7.63248e-12	-5.11494e-11	5.17627e-09	-7.04983e-11	2.10146e-10	-4.94585e-12	-1.02299e-13	5.15039e-09	7.50221e-11	-0.000960286	-1.98623e-05	-0.013688	0.0145663
2022-03-15 10:04:53	1308214	-2.41982e-11	-4.57232e-11	5.43721e-09	-6.32744e-11	2.00518e-10	-1.56804e-11	-9.14464e-14	5.41002e-09	7.15849e-11	-0.0028984	-1.69031e-05	-0.0116958	0.0132319
2022-03-15 10:05:09	1324147	-2.15859e-11	-3.9222e-11	5.57668e-09	-5.35564e-11	2.08879e-10	-1.39877e-11	-7.8444e-14	5.5488e-09	7.45698e-11	-0.00252085	-1.41371e-05	-0.00965189	0.0134389
2022-03-15 10:05:25	1340081	-1.30719e-11	-3.6038e-11	5.68533e-09	-6.58543e-11	1.98682e-10	-8.47059e-12	-7.2076e-14	5.6569e-09	7.09295e-11	-0.00149739	-1.27412e-05	-0.0116414	0.0125386
2022-03-15 10:05:41	1356014	-1.03092e-11	-3.67342e-11	5.16682e-08	-5.25674e-11	2.2072e-10	-6.68036e-12	-7.34684e-14	5.14099e-08	7.8797e-11	-0.000129943	-1.42907e-06	-0.00102252	0.00153272
2022-03-15 10:05:57	1372457	7.10573e-12	-4.70337e-11	2.02189e-07	-6.21349e-11	1.98053e-10	4.60451e-12	-9.40674e-14	2.01178e-07	7.07049e-11	2.28878e-05	-4.67583e-07	-0.000308855	0.000351454
2022-03-15 10:06:13	1388120	9.65348e-12	-3.6898e-11	2.8577e-07	-4.60744e-11	1.98452e-10	6.25546e-12	-7.3796e-14	2.84341e-07	7.08474e-11	2.19998e-05	-2.59533e-07	-0.000162039	0.000249163
2022-03-15 10:06:28	1403274	-2.82724e-12	-5.08832e-11	3.38624e-07	-4.99014e-11	1.82604e-10	-1.83205e-12	-1.01766e-13	3.36931e-07	6.51896e-11	-5.43747e-06	-3.02039e-07	-0.000148106	0.000193481
2022-03-15 10:06:43	1418426	-2.69717e-11	-5.55723e-11	3.62901e-07	-6.07374e-11	1.51597e-10	-1.74777e-11	-1.11145e-13	3.61086e-07	5.41201e-11	-4.8403e-05	-3.07806e-07	-0.000168207	0.000149881
2022-03-15 10:06:58	1433579	-2.07689e-11	-4.64399e-11	3.87088e-07	-3.43891e-11	1.75677e-10	-1.34582e-11	-9.28798e-14	3.85153e-07	6.27167e-11	-3.49426e-05	-2.41151e-07	-8.9287e-05	0.000162836
2022-03-15 10:07:13	1448731	-2.30372e-11	-5.00028e-11	4.0178e-07	-4.78159e-11	1.66824e-10	-1.49281e-11	-1.00006e-13	3.99771e-07	5.95562e-11	-3.73416e-05	-2.50157e-07	-0.000119608	0.000148976
2022-03-15 10:07:28	1463884	-2.47464e-11	-5.5347e-11	3.87537e-07	-4.44941e-11	1.80108e-10	-1.60357e-11	-1.10694e-13	3.85599e-07	6.42986e-11	-4.15863e-05	-2.8707e-07	-0.000115389	0.00016675
2022-03-15 10:07:44	1479036	2.99876e-09	-4.3522e-11	3.81893e-07	2.80746e-10	3.12402e-10	1.9432e-09	-8.7044e-14	3.79984e-07	1.11528e-10	0.0051139	-2.29073e-07	0.000738837	0.000293506
2022-03-15 10:08:03	1498480	1.12417e-08	-3.40313e-11	3.60751e-07	4.1497e-10	3.93556e-10	7.28462e-09	-6.80626e-14	3.58947e-07	1.40499e-10	0.0202944	-1.89617e-07	0.00115608	0.000391421
2022-03-15 10:08:15	1510894	1.16737e-08	-1.84592e-11	3.6093e-07	4.5338e-10	4.24731e-10	7.56456e-09	-3.69184e-14	3.59125e-07	1.51629e-10	0.0210638	-1.02801e-07	0.00126246	0.000422217
2022-03-15 10:08:28	1523306	1.27199e-08	-1.73637e-11	3.64693e-07	4.78858e-10	4.21768e-10	8.2425e-09	-3.47274e-14	3.6287e-07	1.50571e-10	0.0227148	-9.57022e-08	0.00131964	0.000414946
2022-03-15 10:08:40	1535719	1.30759e-08	-1.85104e-11	3.67112e-07	4.67914e-10	4.49503e-10	8.47318e-09	-3.70208e-14	3.65276e-07	1.60473e-10	0.0231966	-1.0135e-07	0.00128099	0.000439318
2022-03-15 10:08:53	1548130	1.35079e-08	-2.01485e-11	3.65768e-07	4.66839e-10	4.57504e-10	8.75312e-09	-4.0297e-14	3.63939e-07	1.63329e-10	0.0240511	-1.10725e-07	0.00128274	0.000448781
2022-03-15 10:09:05	1560544	1.34582e-08	-2.37011e-11	3.63349e-07	4.70053e-10	4.58034e-10	8.72091e-09	-4.74022e-14	3.61532e-07	1.63518e-10	0.0241221	-1.31115e-07	0.00130017	0.000452292
2022-03-15 10:09:17	1572956	1.36403e-08	-1.91861e-11	3.61468e-07	4.67291e-10	4.50401e-10	8.83891e-09	-3.83722e-14	3.59661e-07	1.60793e-10	0.0245757	-1.0669e-07	0.00129926	0.000447069
2022-03-15 10:09:30	1585369	1.35764e-08	-2.05273e-11	3.60662e-07	4.70483e-10	4.46193e-10	8.79751e-09	-4.10546e-14	3.58859e-07	1.59291e-10	0.0245152	-1.14403e-07	0.00131105	0.000443882
2022-03-15 10:09:42	1597780	1.37707e-08	-2.39775e-11	3.60751e-07	4.62163e-10	4.31028e-10	8.92341e-09	-4.7955e-14	3.58947e-07	1.53877e-10	0.02486	-1.33599e-07	0.00128755	0.00042869
2022-03-15 10:09:55	1610194	1.23523e-08	-3.3847e-11	3.6523e-07	4.23527e-10	4.13498e-10	8.00429e-09	-6.7694e-14	3.63404e-07	1.47619e-10	0.0220259	-1.86278e-07	0.00116544	0.000406211
2022-03-15 10:10:07	1622606	9.52244e-09	-3.18915e-11	3.51434e-07	2.53699e-10	3.40974e-10	6.17054e-09	-6.3783e-14	3.49677e-07	1.21728e-10	0.0176464	-1.82406e-07	0.000725524	0.000348115
2022-03-15 10:10:20	1635529	5.02712e-09	-3.10418e-11	3.36205e-07	1.43813e-10	3.04116e-10	3.25757e-09	-6.20836e-14	3.34524e-07	1.08569e-10	0.00973794	-1.85588e-07	0.000429903	0.000324549
2022-03-15 10:10:33	1648472	3.23901e-09	-4.09932e-11	3.33338e-07	8.95581e-11	2.91831e-10	2.09888e-09	-8.19864e-14	3.31671e-07	1.04184e-10	0.00632819	-2.47192e-07	0.000270021	0.000314117
2022-03-15 10:10:46	1661415	2.13737e-09	-5.33199e-11	3.40953e-07	4.71816e-11	2.63297e-10	1.38502e-09	-1.0664e-13	3.39248e-07	9.3997e-11	0.0040826	-3.14342e-07	0.000139077	0.000277074
2022-03-15 10:10:59	1674359	1.48399e-09	-4.01332e-11	3.56093e-07	2.46927e-11	2.42419e-10	9.61626e-10	-8.02664e-14	3.54313e-07	8.65436e-11	0.00271406	-2.26541e-07	6.96919e-05	0.000244258
2022-03-15 10:11:12	1687300	1.02278e-09	-4.86513e-11	3.68724e-07	1.24914e-11	2.29236e-10	6.62761e-10	-9.73026e-14	3.6688e-07	8.18373e-11	0.00180648	-2.65216e-07	3.40476e-05	0.000223062
2022-03-15 10:11:26	1701284	6.72185e-10	-4.79551e-11	3.7813e-07	-2.44132e-11	2.16259e-10	4.35576e-10	-9.59102e-14	3.76239e-07	7.72045e-11	0.00115771	-2.54918e-07	-6.48874e-05	0.0002052
2022-03-15 10:11:41	1716437	4.53359e-10	-3.24342e-11	3.81445e-07	-2.26394e-11	2.12696e-10	2.93777e-10	-6.48684e-14	3.79538e-07	7.59325e-11	0.000774038	-1.70914e-07	-5.96499e-05	0.000200066
2022-03-15 10:11:56	1731591	3.17554e-10	-4.81599e-11	2.78872e-07	-2.38004e-11	2.49299e-10	2.05775e-10	-9.63198e-14	2.77478e-07	8.89997e-11	0.000741591	-3.47126e-07	-8.57741e-05	0.000320746
2022-03-15 10:12:11	1746744	2.36951e-10	-5.63913e-11	1.57039e-07	-4.06994e-11	2.71406e-10	1.53544e-10	-1.12783e-13	1.56254e-07	9.68919e-11	0.000982659	-7.21791e-07	-0.00026047	0.000620093
2022-03-15 10:12:26	1761896	1.98143e-10	-4.19453e-11	8.65367e-08	-4.71386e-11	2.77495e-10	1.28397e-10	-8.38906e-14	8.6104e-08	9.90657e-11	0.00149118	-9.74294e-07	-0.000547461	0.00115054
2022-03-15 10:12:42	1777049	1.49973e-10	-4.80166e-11	4.72557e-08	-5.52549e-11	2.56601e-10	9.71825e-11	-9.60332e-14	4.70194e-08	9.16066e-11	0.00206686	-2.04242e-06	-0.00117515	0.00194827
2022-03-15 10:12:57	1792712	1.30902e-10	-5.13337e-11	2.76621e-08	-4.89661e-11	2.75514e-10	8.48245e-11	-1.02667e-13	2.75238e-08	9.83585e-11	0.00308186	-3.73013e-06	-0.00177905	0.00357358
2022-03-15 10:13:13	1808116	1.09219e-10	-4.68699e-11	1.75863e-08	-5.66094e-11	2.48386e-10	7.07739e-11	-9.37398e-14	1.74984e-08	8.86738e-11	0.0040446	-5.35706e-06	-0.00323512	0.00506755
2022-03-15 10:13:28	1823519	8.71716e-11	-5.0187e-11	1.22902e-08	-4.86544e-11	2.62291e-10	5.64872e-11	-1.00374e-13	1.22287e-08	9.36379e-11	0.00461921	-8.20804e-06	-0.00397869	0.00765719
2022-03-15 10:13:43	1838922	8.50108e-11	-5.12006e-11	9.50525e-09	-5.61471e-11	2.48861e-10	5.5087e-11	-1.02401e-13	9.45772e-09	8.88434e-11	0.00582455	-1.08273e-05	-0.00593664	0.00939374
2022-03-15 10:13:59	1854326	7.37018e-11	-4.17099e-11	8.02548e-09	-4.67946e-11	2.4738e-10	4.77588e-11	-8.34198e-14	7.98535e-09	8.83147e-11	0.0059808	-1.04466e-05	-0.00586005	0.0110596
2022-03-15 10:14:14	1869729	6.36184e-11	-4.55594e-11	7.13006e-09	-6.53706e-11	2.52778e-10	4.12247e-11	-9.11188e-14	7.09441e-09	9.02417e-11	0.00581087	-1.28437e-05	-0.00921438	0.0127201
2022-03-15 10:14:31	1886172	4.49779e-11	-4.12082e-11	6.67131e-09	-4.62571e-11	2.44401e-10	2.91457e-11	-8.24164e-14	6.63795e-09	8.72512e-11	0.00439076	-1.24159e-05	-0.00696858	0.0131443
2022-03-15 10:14:47	1902106	4.08499e-11	-4.67572e-11	6.42085e-09	-4.51499e-11	2.52156e-10	2.64707e-11	-9.35144e-14	6.38875e-09	9.00197e-11	0.00414334	-1.46374e-05	-0.0070671	0.0140904
2022-03-15 10:15:03	1918039	4.62679e-11	-4.16075e-11	6.23418e-09	-5.94796e-11	2.30188e-10	2.99816e-11	-8.3215e-14	6.20301e-09	8.21771e-11	0.0048334	-1.34153e-05	-0.00958883	0.0132479
2022-03-15 10:15:18	1933971	3.07127e-11	-4.64604e-11	6.11935e-09	-5.87379e-11	2.24567e-10	1.99018e-11	-9.29208e-14	6.08875e-09	8.01704e-11	0.00326862	-1.52611e-05	-0.00964695	0.013167
2022-03-15 10:15:34	1949904	3.32496e-11	-4.14334e-11	6.06548e-09	-5.97699e-11	2.20896e-10	2.15457e-11	-8.28668e-14	6.03515e-09	7.88599e-11	0.00357004	-1.37307e-05	-0.00990363	0.0130668
2022-03-15 10:15:50	1965837	1.28784e-11	-4.80985e-11	6.00238e-09	-7.70128e-11	2.38703e-10	8.3452e-12	-9.6197e-14	5.97237e-09	8.5217e-11	0.0013973	-1.6107e-05	-0.0128949	0.0142685
2022-03-15 10:16:06	1981771	2.58429e-11	-4.09728e-11	5.9789e-09	-6.77141e-11	2.34925e-10	1.67462e-11	-8.19456e-14	5.94901e-09	8.38682e-11	0.00281496	-1.37747e-05	-0.0113824	0.0140979
2022-03-15 10:16:22	1997704	1.33837e-11	-4.26313e-11	5.91887e-09	-6.45644e-11	2.25174e-10	8.67264e-12	-8.52626e-14	5.88928e-09	8.03871e-11	0.00147262	-1.44776e-05	-0.010963	0.0136497
2022-03-15 10:16:38	2013637	7.86898e-12	-4.5283e-11	5.87826e-09	-6.38656e-11	2.05209e-10	5.0991e-12	-9.0566e-14	5.84887e-09	7.32596e-11	0.000871809	-1.54844e-05	-0.0109193	0.0125254
2022-03-15 10:16:54	2029571	8.70748e-13	-4.39213e-11	5.88263e-09	-6.59404e-11	2.19714e-10	5.64245e-13	-8.78426e-14	5.85322e-09	7.84379e-11	9.63991e-05	-1.50076e-05	-0.0112657	0.0134008
2022-03-15 10:17:10	2045504	1.25237e-11	-4.73101e-11	5.83376e-09	-5.87379e-11	2.05494e-10	8.11536e-12	-9.46202e-14	5.80459e-09	7.33614e-11	0.00139809	-1.63009e-05	-0.0101192	0.0126385
2022-03-15 10:17:26	2061436	8.39573e-12	-4.53444e-11	5.80693e-09	-6.28659e-11	2.12404e-10	5.44043e-12	-9.06888e-14	5.7779e-09	7.58282e-11	0.000941594	-1.56958e-05	-0.0108804	0.0131238
2022-03-15 10:17:42	2077369	3.50449e-12	-3.86077e-11	5.80618e-09	-7.15303e-11	2.04441e-10	2.27091e-12	-7.72154e-14	5.77715e-09	7.29854e-11	0.000393085	-1.33657e-05	-0.0123816	0.0126335
2022-03-15 10:17:58	2093301	2.62299e-12	-4.5928e-11	5.7791e-09	-5.52656e-11	2.14661e-10	1.6997e-12	-9.1856e-14	5.7502e-09	7.6634e-11	0.000295589	-1.59744e-05	-0.00961107	0.0133272
2022-03-15 10:18:14	2109234	-3.69799e-12	-5.11596e-11	5.78319e-09	-6.78968e-11	2.17311e-10	-2.3963e-12	-1.02319e-13	5.75427e-09	7.758e-11	-0.000416438	-1.77814e-05	-0.0117994	0.0134822
2022-03-15 10:18:30	2125167	-1.01479e-11	-4.5539e-11	5.75958e-09	-6.77141e-11	2.13541e-10	-6.57584e-12	-9.1078e-14	5.73078e-09	7.62341e-11	-0.00114746	-1.58928e-05	-0.0118159	0.0133026
2022-03-15 10:18:46	2141101	-6.77248e-13	-4.82725e-11	5.75545e-09	-7.20033e-11	2.18885e-10	-4.38857e-13	-9.6545e-14	5.72667e-09	7.81419e-11	-7.66338e-05	-1.68588e-05	-0.0125733	0.0136453
2022-03-15 10:19:02	2157034	-2.36069e-11	-4.46175e-11	5.72949e-09	-6.30379e-11	2.11129e-10	-1.52973e-11	-8.9235e-14	5.70084e-09	7.53731e-11	-0.00268334	-1.56529e-05	-0.0110576	0.0132214
2022-03-15 10:19:17	2172967	-8.54623e-12	-5.58282e-11	5.72663e-09	-6.76281e-11	2.13195e-10	-5.53796e-12	-1.11656e-13	5.698e-09	7.61106e-11	-0.000971913	-1.95957e-05	-0.0118687	0.0133574
2022-03-15 10:19:33	2188900	-1.51574e-11	-4.83237e-11	5.73056e-09	-8.30113e-11	2.03696e-10	-9.822e-12	-9.66474e-14	5.70191e-09	7.27195e-11	-0.00172258	-1.695e-05	-0.0145585	0.0127535
2022-03-15 10:19:49	2204834	-1.60389e-11	-4.36653e-11	5.6953e-09	-7.22506e-11	2.13901e-10	-1.03932e-11	-8.73306e-14	5.66682e-09	7.63627e-11	-0.00183404	-1.54109e-05	-0.0127498	0.0134754
2022-03-15 10:20:05	2220766	-2.54774e-12	-4.6317e-11	5.70476e-09	-6.30916e-11	2.02637e-10	-1.65094e-12	-9.2634e-14	5.67624e-09	7.23414e-11	-0.00029085	-1.63196e-05	-0.011115	0.0127446
2022-03-15 10:20:21	2236699	-1.99412e-11	-5.89713e-11	5.6757e-09	-8.35596e-11	1.96878e-10	-1.29219e-11	-1.17943e-13	5.64732e-09	7.02854e-11	-0.00228815	-2.08847e-05	-0.0147963	0.0124458
2022-03-15 10:20:37	2252631	-1.02554e-11	-4.44639e-11	5.65632e-09	-7.57766e-11	2.00717e-10	-6.6455e-12	-8.89278e-14	5.62804e-09	7.1656e-11	-0.00118078	-1.58009e-05	-0.0134641	0.012732
2022-03-15 10:20:53	2268564	-1.63184e-11	-4.67777e-11	5.69327e-09	-8.13236e-11	2.01209e-10	-1.05743e-11	-9.35554e-14	5.6648e-09	7.18316e-11	-0.00186667	-1.65152e-05	-0.0143559	0.0126803
2022-03-15 10:21:09	2284496	-2.00164e-11	-5.18866e-11	5.67672e-09	-6.75098e-11	1.86381e-10	-1.29706e-11	-1.03773e-13	5.64834e-09	6.6538e-11	-0.00229636	-1.83723e-05	-0.0119522	0.0117801
2022-03-15 10:21:25	2300429	-1.76514e-11	-4.57744e-11	5.70004e-09	-6.47793e-11	1.96341e-10	-1.14381e-11	-9.15488e-14	5.67154e-09	7.00937e-11	-0.00201676	-1.61418e-05	-0.0114218	0.0123589
2022-03-15 10:21:41	2316362	-2.11667e-11	-4.32661e-11	5.65448e-09	-7.33578e-11	1.99089e-10	-1.3716e-11	-8.65322e-14	5.62621e-09	7.10748e-11	-0.00243788	-1.53802e-05	-0.0130386	0.0126328
2022-03-15 10:21:57	2332296	-1.11047e-11	-4.37472e-11	5.65097e-09	-6.97243e-11	1.93868e-10	-7.19585e-12	-8.74944e-14	5.62272e-09	6.92109e-11	-0.00127978	-1.55609e-05	-0.0124005	0.0123092
2022-03-15 10:22:13	2348229	-1.92962e-11	-4.97058e-11	5.64364e-09	-7.60453e-11	1.88324e-10	-1.25039e-11	-9.94116e-14	5.61542e-09	6.72317e-11	-0.00222671	-1.77033e-05	-0.0135422	0.0119727
2022-03-15 10:22:29	2364161	-2.96269e-11	-3.98466e-11	5.62192e-09	-8.44411e-11	1.90904e-10	-1.91982e-11	-7.96932e-14	5.59381e-09	6.81527e-11	-0.00343205	-1.42467e-05	-0.0150955	0.0121836
2022-03-15 10:22:45	2380094	-1.80922e-11	-5.11494e-11	5.62693e-09	-7.68731e-11	1.97838e-10	-1.17237e-11	-1.02299e-13	5.5988e-09	7.06282e-11	-0.00209398	-1.82716e-05	-0.0137303	0.0126149
2022-03-15 10:23:01	2396026	-3.83344e-11	-4.9368e-11	5.63959e-09	-7.80663e-11	1.74418e-10	-2.48407e-11	-9.8736e-14	5.61139e-09	6.22672e-11	-0.00442683	-1.75956e-05	-0.0139121	0.0110966
2022-03-15 10:23:16	2411959	-3.20994e-11	-3.66728e-11	5.62239e-09	-7.90661e-11	1.84776e-10	-2.08004e-11	-7.33456e-14	5.59428e-09	6.5965e-11	-0.00371816	-1.31108e-05	-0.0141334	0.0117915
2022-03-15 10:23:32	2427891	-2.86057e-11	-5.0269e-11	5.60345e-09	-7.79266e-11	1.91219e-10	-1.85365e-11	-1.00538e-13	5.57543e-09	6.82652e-11	-0.00332467	-1.80323e-05	-0.0139768	0.0122439
2022-03-15 10:23:48	2443824	-2.65524e-11	-4.08191e-11	5.60422e-09	-7.78728e-11	1.91779e-10	-1.7206e-11	-8.16382e-14	5.5762e-09	6.84651e-11	-0.00308561	-1.46405e-05	-0.0139652	0.0122781
2022-03-15 10:24:04	2459756	-1.70924e-11	-3.98977e-11	5.60134e-09	-8.27533e-11	1.931e-10	-1.10759e-11	-7.97954e-14	5.57333e-09	6.89367e-11	-0.0019873	-1.43174e-05	-0.0148481	0.012369
2022-03-15 10:24:20	2475689	-2.64772e-11	-5.82239e-11	5.59987e-09	-7.87758e-11	2.03013e-10	-1.71572e-11	-1.16448e-13	5.57187e-09	7.24756e-11	-0.00307926	-2.08992e-05	-0.0141381	0.0130074
2022-03-15 10:24:36	2491621	-3.20779e-11	-4.0727e-11	5.60613e-09	-6.90148e-11	1.93161e-10	-2.07865e-11	-8.1454e-14	5.5781e-09	6.89585e-11	-0.00372644	-1.46025e-05	-0.0123725	0.0123624
2022-03-15 10:24:52	2507554	-2.37789e-11	-5.45996e-11	5.59494e-09	-7.41963e-11	1.98053e-10	-1.54087e-11	-1.09199e-13	5.56697e-09	7.07049e-11	-0.00276789	-1.96156e-05	-0.013328	0.0127008
2022-03-15 10:25:08	2523486	-3.92051e-11	-5.0269e-11	5.38505e-09	-8.25813e-11	1.84101e-10	-2.54049e-11	-1.00538e-13	5.35812e-09	6.57241e-11	-0.00474138	-1.87637e-05	-0.0154124	0.0122662
2022-03-15 10:25:24	2539419	-2.92829e-11	-5.54085e-11	5.16905e-09	-6.98211e-11	1.82458e-10	-1.89753e-11	-1.10817e-13	5.1432e-09	6.51375e-11	-0.0036894	-2.15463e-05	-0.0135754	0.0126648
2022-03-15 10:25:40	2555351	-2.40584e-11	-5.02996e-11	5.2277e-09	-7.38738e-11	1.93607e-10	-1.55898e-11	-1.00599e-13	5.20156e-09	6.91177e-11	-0.00299715	-1.93402e-05	-0.0142022	0.0132879
2022-03-15 10:25:56	2571284	-2.17472e-11	-5.59613e-11	5.47303e-09	-7.65506e-11	1.91756e-10	-1.40922e-11	-1.11923e-13	5.44566e-09	6.84569e-11	-0.00258778	-2.05526e-05	-0.0140572	0.0125709
2022-03-15 10:26:12	2587217	-2.95947e-11	-4.54877e-11	5.5713e-09	-7.11111e-11	1.80984e-10	-1.91774e-11	-9.09754e-14	5.54344e-09	6.46113e-11	-0.00345947	-1.64114e-05	-0.012828	0.0116554
2022-03-15 10:26:28	2603150	-4.82351e-11	-5.68828e-11	5.90215e-09	-7.60991e-11	1.91011e-10	-3.12563e-11	-1.13766e-13	5.87264e-09	6.81909e-11	-0.00532237	-1.93721e-05	-0.0129582	0.0116116
2022-03-15 10:26:44	2619084	-9.73948e-12	-4.60815e-11	7.30063e-08	-6.31346e-11	1.82174e-10	-6.31118e-12	-9.2163e-14	7.26413e-08	6.50361e-11	-8.68815e-05	-1.26874e-06	-0.000869129	0.000895305
2022-03-15 10:27:00	2635527	-2.09409e-11	-4.60304e-11	2.68033e-07	-6.08449e-11	1.72076e-10	-1.35697e-11	-9.20608e-14	2.66693e-07	6.14311e-11	-5.08814e-05	-3.45194e-07	-0.000228146	0.000230344
2022-03-15 10:27:16	2651191	-1.88984e-11	-2.70899e-11	2.97147e-07	-7.01651e-11	1.69504e-10	-1.22462e-11	-5.41798e-14	2.95661e-07	6.05129e-11	-4.14196e-05	-1.8325e-07	-0.000237316	0.00020467
2022-03-15 10:27:31	2666344	-2.87884e-11	-6.60868e-11	3.42924e-07	-6.86171e-11	1.56289e-10	-1.86549e-11	-1.32174e-13	3.41209e-07	5.57952e-11	-5.46728e-05	-3.87368e-07	-0.0002011	0.000163522
2022-03-15 10:27:46	2681496	-3.30562e-11	-5.2593e-11	3.53405e-07	-7.04983e-11	1.43312e-10	-2.14204e-11	-1.05186e-13	3.51638e-07	5.11624e-11	-6.09161e-05	-2.99132e-07	-0.000200485	0.000145497
2022-03-15 10:28:01	2696649	-3.68831e-11	-5.51013e-11	3.86372e-07	-6.28659e-11	1.50607e-10	-2.39002e-11	-1.10203e-13	3.8444e-07	5.37667e-11	-6.2169e-05	-2.86657e-07	-0.000163526	0.000139857
2022-03-15 10:28:16	2711801	-5.48464e-11	-6.31996e-11	3.97749e-07	-7.67871e-11	1.31971e-10	-3.55405e-11	-1.26399e-13	3.9576e-07	4.71136e-11	-8.9803e-05	-3.19383e-07	-0.000194024	0.000119046
2022-03-15 10:28:31	2726954	-4.26344e-11	-6.36706e-11	3.82968e-07	-5.32661e-11	1.93269e-10	-2.76271e-11	-1.27341e-13	3.81053e-07	6.8997e-11	-7.25019e-05	-3.34182e-07	-0.000139787	0.000181069
2022-03-15 10:28:47	2742107	4.19458e-09	-4.72794e-11	3.79743e-07	2.52409e-10	2.93812e-10	2.71809e-09	-9.45588e-14	3.77844e-07	1.04891e-10	0.00719367	-2.50259e-07	0.000668024	0.000277603
2022-03-15 10:29:06	2761552	1.01519e-08	-5.47225e-11	3.46776e-07	3.46676e-10	3.56016e-10	6.57843e-09	-1.09445e-13	3.45042e-07	1.27098e-10	0.0190656	-3.17193e-07	0.00100474	0.000368354
2022-03-15 10:29:18	2773966	1.12464e-08	-4.58768e-11	3.57078e-07	3.7985e-10	3.67196e-10	7.28767e-09	-9.17536e-14	3.55293e-07	1.31089e-10	0.0205117	-2.58248e-07	0.00106912	0.000368961
2022-03-15 10:29:31	2786379	1.22535e-08	-3.85361e-11	3.61109e-07	3.99254e-10	3.91276e-10	7.94027e-09	-7.70722e-14	3.59303e-07	1.39686e-10	0.0220991	-2.14504e-07	0.00111119	0.000388768
2022-03-15 10:29:43	2798791	1.27379e-08	-4.20477e-11	3.62453e-07	4.068e-10	3.96536e-10	8.25416e-09	-8.40954e-14	3.60641e-07	1.41563e-10	0.0228875	-2.33183e-07	0.00112799	0.000392533
2022-03-15 10:29:56	2811204	1.3086e-08	-4.44537e-11	3.60841e-07	4.1296e-10	3.74652e-10	8.47973e-09	-8.89074e-14	3.59037e-07	1.33751e-10	0.023618	-2.47628e-07	0.00115019	0.000372527
2022-03-15 10:30:08	2823616	1.31451e-08	-3.61199e-11	3.58959e-07	4.12068e-10	3.88926e-10	8.51802e-09	-7.22398e-14	3.57164e-07	1.38847e-10	0.023849	-2.02259e-07	0.00115372	0.000388747
2022-03-15 10:30:21	2836029	1.32392e-08	-3.87715e-11	3.56899e-07	4.12939e-10	3.74406e-10	8.579e-09	-7.7543e-14	3.55115e-07	1.33663e-10	0.0241584	-2.18361e-07	0.00116283	0.000376394
2022-03-15 10:30:33	2848441	1.3264e-08	-4.50577e-11	3.55913e-07	4.07703e-10	3.80242e-10	8.59507e-09	-9.01154e-14	3.54133e-07	1.35746e-10	0.0242707	-2.54467e-07	0.00115127	0.00038332
2022-03-15 10:30:45	2860854	1.32681e-08	-4.18225e-11	3.56362e-07	3.91525e-10	3.562e-10	8.59773e-09	-8.3645e-14	3.5458e-07	1.27163e-10	0.0242476	-2.35899e-07	0.00110419	0.000358631
2022-03-15 10:30:58	2873266	1.12041e-08	-4.72385e-11	3.77234e-07	3.63596e-10	3.22891e-10	7.26026e-09	-9.4477e-14	3.75348e-07	1.15272e-10	0.0193427	-2.51705e-07	0.000968691	0.000307107
2022-03-15 10:31:11	2886189	6.86784e-09	-5.44256e-11	3.36295e-07	1.66699e-10	2.85688e-10	4.45036e-09	-1.08851e-13	3.34614e-07	1.01991e-10	0.0133	-3.25304e-07	0.000498184	0.000304801
2022-03-15 10:31:24	2899132	4.2808e-09	-5.37704e-11	3.33876e-07	9.01493e-11	2.74723e-10	2.77396e-09	-1.07541e-13	3.32207e-07	9.80761e-11	0.0083501	-3.23717e-07	0.000271365	0.000295226
2022-03-15 10:31:37	2912075	2.78894e-09	-5.73844e-11	3.3298e-07	4.30321e-11	2.42711e-10	1.80723e-09	-1.14769e-13	3.31315e-07	8.66478e-11	0.00545473	-3.46404e-07	0.000129883	0.000261527
2022-03-15 10:31:50	2925019	1.85283e-09	-5.9862e-11	3.44357e-07	1.76622e-11	2.34603e-10	1.20063e-09	-1.19724e-13	3.42635e-07	8.37533e-11	0.00350412	-3.49421e-07	5.15481e-05	0.000244439
2022-03-15 10:32:02	2937961	1.28113e-09	-5.26647e-11	3.58691e-07	-1.99949e-12	2.12719e-10	8.30172e-10	-1.05329e-13	3.56898e-07	7.59407e-11	0.00232608	-2.95125e-07	-5.60242e-06	0.00021278
2022-03-15 10:32:16	2951944	8.29973e-10	-5.62172e-11	3.72487e-07	-1.90597e-11	1.91288e-10	5.37823e-10	-1.12434e-13	3.70625e-07	6.82898e-11	0.00145112	-3.03365e-07	-5.14259e-05	0.000184256
2022-03-15 10:32:32	2967097	5.47679e-10	-5.38523e-11	3.8028e-07	-3.59909e-11	2.1083e-10	3.54896e-10	-1.07705e-13	3.78379e-07	7.52663e-11	0.000937939	-2.84648e-07	-9.51188e-05	0.000198918
2022-03-15 10:32:47	2982251	3.71153e-10	-5.41185e-11	3.59945e-07	-3.54104e-11	2.11705e-10	2.40507e-10	-1.08237e-13	3.58145e-07	7.55787e-11	0.000671535	-3.02215e-07	-9.88716e-05	0.000211028
2022-03-15 10:33:02	2997404	2.72458e-10	-5.29513e-11	2.24316e-07	-4.82459e-11	2.34964e-10	1.76553e-10	-1.05903e-13	2.23194e-07	8.38821e-11	0.000791027	-4.74486e-07	-0.000216161	0.000375825
2022-03-15 10:33:17	3012556	2.10979e-10	-6.00156e-11	1.23266e-07	-6.49729e-11	2.41606e-10	1.36714e-10	-1.20031e-13	1.2265e-07	8.62533e-11	0.00111467	-9.78651e-07	-0.000529744	0.00070325
2022-03-15 10:33:32	3027709	1.55143e-10	-6.37423e-11	6.61012e-08	-6.18339e-11	2.46066e-10	1.00533e-10	-1.27485e-13	6.57707e-08	8.78456e-11	0.00152853	-1.93832e-06	-0.000940144	0.00133563
2022-03-15 10:33:48	3043372	1.31063e-10	-5.49375e-11	3.74553e-08	-6.86816e-11	2.37589e-10	8.49288e-11	-1.09875e-13	3.7268e-08	8.48193e-11	0.00227887	-2.94824e-06	-0.00184291	0.00227593
2022-03-15 10:34:03	3058775	1.00103e-10	-5.17944e-11	2.26522e-08	-5.98559e-11	2.42581e-10	6.48667e-11	-1.03589e-13	2.25389e-08	8.66014e-11	0.00287799	-4.59599e-06	-0.00265567	0.0038423
2022-03-15 10:34:19	3074179	7.22076e-11	-6.07425e-11	1.49043e-08	-6.85741e-11	2.34388e-10	4.67905e-11	-1.21485e-13	1.48298e-08	8.36765e-11	0.00315517	-8.19196e-06	-0.00462408	0.00564247
2022-03-15 10:34:34	3089582	7.09821e-11	-6.29539e-11	1.08938e-08	-6.59188e-11	2.19491e-10	4.59964e-11	-1.25908e-13	1.08393e-08	7.83583e-11	0.00424347	-1.16158e-05	-0.00608145	0.00722907
2022-03-15 10:34:49	3104985	6.26724e-11	-5.1559e-11	8.73433e-09	-6.26939e-11	2.28099e-10	4.06117e-11	-1.03118e-13	8.69066e-09	8.14313e-11	0.00467303	-1.18654e-05	-0.00721394	0.00936999
2022-03-15 10:35:05	3120389	4.31074e-11	-5.47942e-11	7.61287e-09	-6.97028e-11	2.29804e-10	2.79336e-11	-1.09588e-13	7.57481e-09	8.204e-11	0.0036877	-1.44675e-05	-0.00920193	0.0108306
2022-03-15 10:35:20	3135791	4.13551e-11	-5.49477e-11	6.91228e-09	-7.62388e-11	2.42642e-10	2.67981e-11	-1.09895e-13	6.87772e-09	8.66232e-11	0.00389637	-1.59785e-05	-0.0110849	0.0125948
2022-03-15 10:35:37	3152234	3.93449e-11	-4.65832e-11	6.55184e-09	-7.27236e-11	2.36207e-10	2.54955e-11	-9.31664e-14	6.51908e-09	8.43259e-11	0.0039109	-1.42913e-05	-0.0111555	0.0129352
2022-03-15 10:35:53	3168167	1.87694e-11	-5.39239e-11	6.32089e-09	-7.93241e-11	2.05839e-10	1.21626e-11	-1.07848e-13	6.28929e-09	7.34845e-11	0.00193386	-1.71479e-05	-0.0126126	0.0116841
2022-03-15 10:36:09	3184101	1.63399e-11	-5.36372e-11	6.20421e-09	-7.32181e-11	2.23046e-10	1.05883e-11	-1.07274e-13	6.17319e-09	7.96274e-11	0.0017152	-1.73775e-05	-0.0118607	0.0128989
2022-03-15 10:36:25	3200034	1.94789e-11	-4.78937e-11	6.11267e-09	-6.93051e-11	2.10906e-10	1.26223e-11	-9.57874e-14	6.08211e-09	7.52934e-11	0.00207532	-1.5749e-05	-0.0113949	0.0123795
2022-03-15 10:36:40	3215967	1.37384e-11	-5.22347e-11	6.031e-09	-6.99823e-11	2.08649e-10	8.90248e-12	-1.04469e-13	6.00085e-09	7.44877e-11	0.00148354	-1.74091e-05	-0.0116621	0.0124129
2022-03-15 10:36:56	3231901	1.93177e-11	-6.45306e-11	5.9964e-09	-8.64298e-11	2.15406e-10	1.25179e-11	-1.29061e-13	5.96642e-09	7.68999e-11	0.00209805	-2.16313e-05	-0.014486	0.0128888
2022-03-15 10:37:12	3247834	-1.79524e-12	-4.15256e-11	5.96018e-09	-7.44113e-11	2.11168e-10	-1.16332e-12	-8.30512e-14	5.93038e-09	7.5387e-11	-0.000196162	-1.40044e-05	-0.0125475	0.012712
2022-03-15 10:37:28	3263765	-1.35772e-11	-4.5713e-11	5.91168e-09	-7.01006e-11	2.08411e-10	-8.79803e-12	-9.1426e-14	5.88212e-09	7.44027e-11	-0.00149572	-1.5543e-05	-0.0119176	0.012649
2022-03-15 10:37:44	3279699	-2.05324e-12	-5.32277e-11	5.89297e-09	-7.50563e-11	2.19084e-10	-1.3305e-12	-1.06455e-13	5.86351e-09	7.8213e-11	-0.000226912	-1.81556e-05	-0.0128006	0.0133389
2022-03-15 10:38:00	3295630	9.45998e-13	-4.93782e-11	5.89102e-09	-7.49273e-11	2.21465e-10	6.13007e-13	-9.87564e-14	5.86156e-09	7.9063e-11	0.000104581	-1.68481e-05	-0.0127828	0.0134884
2022-03-15 10:38:16	3311564	-4.29999e-12	-4.83953e-11	5.83983e-09	-8.40433e-11	2.04879e-10	-2.78639e-12	-9.67906e-14	5.81063e-09	7.31418e-11	-0.000479534	-1.66575e-05	-0.0144637	0.0125876
2022-03-15 10:38:32	3327495	-3.99899e-12	-5.30025e-11	5.81938e-09	-7.54648e-11	2.04065e-10	-2.59135e-12	-1.06005e-13	5.79028e-09	7.28512e-11	-0.000447533	-1.83074e-05	-0.013033	0.0125816
2022-03-15 10:38:48	3343429	-7.29923e-12	-4.81394e-11	5.81057e-09	-8.24093e-11	2.04149e-10	-4.7299e-12	-9.62788e-14	5.78152e-09	7.28812e-11	-0.000818107	-1.66529e-05	-0.0142539	0.0126059
2022-03-15 10:39:04	3359362	-6.17049e-12	-4.84158e-11	5.78492e-09	-7.97218e-11	1.77274e-10	-3.99848e-12	-9.68316e-14	5.756e-09	6.32868e-11	-0.000694663	-1.68227e-05	-0.0138502	0.0109949
2022-03-15 10:39:20	3375296	-1.70494e-11	-5.16409e-11	5.79091e-09	-7.52928e-11	2.08242e-10	-1.1048e-11	-1.03282e-13	5.76196e-09	7.43424e-11	-0.00191741	-1.79248e-05	-0.0130672	0.0129023
2022-03-15 10:39:36	3391229	-2.42734e-11	-4.76172e-11	5.77091e-09	-8.54623e-11	1.90727e-10	-1.57292e-11	-9.52344e-14	5.74206e-09	6.80895e-11	-0.00273929	-1.65854e-05	-0.0148836	0.011858
2022-03-15 10:39:52	3407162	-2.31769e-11	-5.66677e-11	5.74267e-09	-8.91066e-11	1.88347e-10	-1.50186e-11	-1.13335e-13	5.71396e-09	6.72399e-11	-0.00262841	-1.98348e-05	-0.0155946	0.0117677
2022-03-15 10:40:08	3423096	-1.48242e-11	-6.27287e-11	5.72455e-09	-8.22051e-11	1.93614e-10	-9.60608e-12	-1.25457e-13	5.69593e-09	6.91202e-11	-0.00168648	-2.20258e-05	-0.0144323	0.012135
2022-03-15 10:40:24	3439029	-1.66517e-11	-5.31766e-11	5.70762e-09	-7.85286e-11	1.85122e-10	-1.07903e-11	-1.06353e-13	5.67908e-09	6.60886e-11	-0.00190001	-1.87272e-05	-0.0138277	0.0116372
2022-03-15 10:40:39	3454962	-2.02314e-11	-5.86744e-11	5.71348e-09	-8.27856e-11	1.77229e-10	-1.31099e-11	-1.17349e-13	5.68491e-09	6.32708e-11	-0.00230609	-2.06421e-05	-0.0145623	0.0111296
2022-03-15 10:40:55	3470896	-2.60042e-11	-4.7648e-11	5.71194e-09	-8.73436e-11	1.7911e-10	-1.68507e-11	-9.5296e-14	5.68338e-09	6.39423e-11	-0.00296491	-1.67675e-05	-0.0153682	0.0112507
2022-03-15 10:41:11	3486829	-3.19382e-11	-5.42618e-11	5.69968e-09	-8.05066e-11	1.73174e-10	-2.0696e-11	-1.08524e-13	5.67118e-09	6.18231e-11	-0.00364932	-1.9136e-05	-0.0141957	0.0109013
2022-03-15 10:41:27	3502762	-3.46041e-11	-5.58896e-11	5.64894e-09	-8.87303e-11	1.91326e-10	-2.24235e-11	-1.11779e-13	5.6207e-09	6.83034e-11	-0.00398945	-1.98871e-05	-0.0157864	0.0121521
2022-03-15 10:41:43	3518696	-4.08069e-11	-6.15923e-11	5.68347e-09	-8.46023e-11	1.76223e-10	-2.64429e-11	-1.23185e-13	5.65505e-09	6.29116e-11	-0.00467597	-2.17831e-05	-0.0149605	0.0111248
2022-03-15 10:41:59	3534629	-2.15644e-11	-6.45408e-11	5.66856e-09	-7.02511e-11	1.7633e-10	-1.39737e-11	-1.29082e-13	5.64022e-09	6.29498e-11	-0.00247752	-2.28859e-05	-0.0124554	0.0111609
2022-03-15 10:42:15	3550562	-2.25534e-11	-6.04047e-11	5.67807e-09	-7.72708e-11	1.86512e-10	-1.46146e-11	-1.20809e-13	5.64968e-09	6.65848e-11	-0.0025868	-2.13834e-05	-0.013677	0.0117856
2022-03-15 10:42:31	3566496	-2.62837e-11	-6.4377e-11	5.66305e-09	-7.93456e-11	1.87126e-10	-1.70318e-11	-1.28754e-13	5.63473e-09	6.6804e-11	-0.00302265	-2.28501e-05	-0.0140815	0.0118557
2022-03-15 10:42:47	3582429	-4.01511e-11	-5.3842e-11	5.65562e-09	-8.58816e-11	1.82304e-10	-2.60179e-11	-1.07684e-13	5.62734e-09	6.50825e-11	-0.00462348	-1.91359e-05	-0.0152615	0.0115654
2022-03-15 10:43:03	3598361	-1.98874e-11	-5.0658e-11	5.6313e-09	-7.70343e-11	1.81137e-10	-1.2887e-11	-1.01316e-13	5.60314e-09	6.46659e-11	-0.00229997	-1.8082e-05	-0.0137484	0.011541
2022-03-15 10:43:19	3614294	-2.54989e-11	-5.24496e-11	5.63641e-09	-6.71013e-11	1.83333e-10	-1.65233e-11	-1.04899e-13	5.60823e-09	6.54499e-11	-0.00294626	-1.87045e-05	-0.0119648	0.0116703
2022-03-15 10:43:35	3630227	-1.87372e-11	-6.49298e-11	5.65082e-09	-8.54301e-11	1.87379e-10	-1.21417e-11	-1.2986e-13	5.62257e-09	6.68943e-11	-0.00215946	-2.30961e-05	-0.0151941	0.0118975
2022-03-15 10:43:51	3646161	-3.09062e-11	-5.17228e-11	5.62815e-09	-7.77976e-11	1.80008e-10	-2.00272e-11	-1.03446e-13	5.60001e-09	6.42629e-11	-0.00357628	-1.84724e-05	-0.0138924	0.0114755
2022-03-15 10:44:07	3662094	-2.70362e-11	-5.0228e-11	5.63343e-09	-9.14286e-11	1.74694e-10	-1.75195e-11	-1.00456e-13	5.60526e-09	6.23658e-11	-0.00312554	-1.79217e-05	-0.0163112	0.0111263
2022-03-15 10:44:23	3678027	-3.30669e-11	-5.30947e-11	5.60492e-09	-8.00013e-11	1.95557e-10	-2.14274e-11	-1.06189e-13	5.5769e-09	6.98138e-11	-0.00384216	-1.9041e-05	-0.0143451	0.0125184
2022-03-15 10:44:38	3693960	-3.71949e-11	-5.56747e-11	5.61049e-09	-8.05388e-11	1.74111e-10	-2.41023e-11	-1.11349e-13	5.58244e-09	6.21576e-11	-0.00431752	-1.99464e-05	-0.0144272	0.0111345
2022-03-15 10:44:54	3709894	-2.46389e-11	-5.06887e-11	5.61976e-09	-9.17081e-11	1.92762e-10	-1.5966e-11	-1.01377e-13	5.59166e-09	6.8816e-11	-0.00285532	-1.81301e-05	-0.0164009	0.0123069
2022-03-15 10:45:10	3725827	-3.20242e-11	-5.31868e-11	5.61072e-09	-7.95928e-11	1.80492e-10	-2.07517e-11	-1.06374e-13	5.58267e-09	6.44356e-11	-0.00371716	-1.90543e-05	-0.0142571	0.0115421
2022-03-15 10:45:26	3741761	-3.30024e-11	-5.22551e-11	5.61557e-09	-8.03883e-11	1.82941e-10	-2.13856e-11	-1.0451e-13	5.58749e-09	6.53099e-11	-0.0038274	-1.87043e-05	-0.0143872	0.0116886
2022-03-15 10:45:42	3757694	-4.35911e-11	-5.58794e-11	5.61973e-09	-7.55723e-11	1.74326e-10	-2.8247e-11	-1.11759e-13	5.59163e-09	6.22344e-11	-0.00505166	-1.99868e-05	-0.0135153	0.0111299
2022-03-15 10:45:58	3773625	-3.41741e-11	-4.58153e-11	6.17837e-09	-7.62173e-11	1.65496e-10	-2.21448e-11	-9.16306e-14	6.14748e-09	5.90821e-11	-0.00360226	-1.49054e-05	-0.0123981	0.00961078
2022-03-15 10:46:14	3789559	-3.18414e-11	-5.08525e-11	5.26448e-09	-7.89801e-11	1.68997e-10	-2.06332e-11	-1.01705e-13	5.23816e-09	6.03319e-11	-0.00393902	-1.94162e-05	-0.0150778	0.0115178
2022-03-15 10:46:30	3805491	-3.11534e-11	-5.00539e-11	5.15917e-09	-7.09068e-11	1.79217e-10	-2.01874e-11	-1.00108e-13	5.13337e-09	6.39805e-11	-0.00393258	-1.95014e-05	-0.0138129	0.0124636
2022-03-15 10:46:46	3821424	-2.48862e-11	-4.65115e-11	5.31842e-09	-8.51721e-11	1.77912e-10	-1.61263e-11	-9.3023e-14	5.29183e-09	6.35146e-11	-0.00304739	-1.75786e-05	-0.016095	0.0120024
2022-03-15 10:47:02	3837357	-3.74959e-11	-5.41287e-11	5.52768e-09	-7.93241e-11	1.88278e-10	-2.42973e-11	-1.08257e-13	5.50004e-09	6.72152e-11	-0.00441767	-1.9683e-05	-0.0144225	0.0122209
2022-03-15 10:47:18	3853291	-3.68401e-11	-5.92785e-11	5.61077e-09	-8.38498e-11	1.8675e-10	-2.38724e-11	-1.18557e-13	5.58272e-09	6.66697e-11	-0.00427612	-2.12364e-05	-0.0150195	0.0119422
2022-03-15 10:47:34	3869224	-3.43246e-11	-6.55953e-11	1.47011e-08	-8.34521e-11	1.80937e-10	-2.22423e-11	-1.31191e-13	1.46276e-08	6.45945e-11	-0.00152057	-8.96871e-06	-0.00570511	0.00441594
2022-03-15 10:47:50	3885669	-1.73612e-11	-5.71285e-11	1.21922e-07	-7.35621e-11	1.47604e-10	-1.12501e-11	-1.14257e-13	1.21312e-07	5.26946e-11	-9.27363e-05	-9.41841e-07	-0.000606386	0.000434371
2022-03-15 10:48:06	3901332	-1.20937e-11	-5.61251e-11	2.48414e-07	-7.04016e-11	1.588e-10	-7.83672e-12	-1.1225e-13	2.47172e-07	5.66916e-11	-3.17055e-05	-4.54138e-07	-0.000284828	0.000229361
2022-03-15 10:48:21	3916486	-3.19596e-11	-5.88382e-11	3.08793e-07	-7.06918e-11	1.57817e-10	-2.07098e-11	-1.17676e-13	3.07249e-07	5.63407e-11	-6.7404e-05	-3.83e-07	-0.00023008	0.000183371
2022-03-15 10:48:36	3931639	-2.12419e-11	-5.83366e-11	3.50001e-07	-7.10466e-11	1.53962e-10	-1.37648e-11	-1.16673e-13	3.48251e-07	5.49644e-11	-3.95254e-05	-3.35026e-07	-0.00020401	0.00015783
2022-03-15 10:48:51	3946791	-3.54426e-11	-5.12723e-11	3.81624e-07	-7.33471e-11	1.34251e-10	-2.29668e-11	-1.02545e-13	3.79716e-07	4.79276e-11	-6.04842e-05	-2.70056e-07	-0.000193163	0.00012622
2022-03-15 10:49:06	3961944	-3.58726e-11	-6.10496e-11	3.73651e-07	-7.63248e-11	1.40095e-10	-2.32454e-11	-1.22099e-13	3.71783e-07	5.00139e-11	-6.25243e-05	-3.28415e-07	-0.000205294	0.000134525
2022-03-15 10:49:22	3977096	-4.73536e-11	-6.22065e-11	3.95868e-07	-7.45188e-11	1.36256e-10	-3.06851e-11	-1.24413e-13	3.93889e-07	4.86434e-11	-7.79031e-05	-3.15858e-07	-0.000189187	0.000123495
2022-03-15 10:49:37	3992249	9.22778e-11	-5.40877e-11	3.98018e-07	1.50714e-11	2.09179e-10	5.9796e-11	-1.08175e-13	3.96028e-07	7.46769e-11	0.000150989	-2.73151e-07	3.80564e-05	0.000188565
2022-03-15 10:49:55	4010652	6.7142e-09	-4.54366e-11	3.62722e-07	2.88809e-10	3.10068e-10	4.3508e-09	-9.08732e-14	3.60908e-07	1.10694e-10	0.0120551	-2.5179e-07	0.000800228	0.00030671
2022-03-15 10:50:08	4023594	9.27912e-09	-5.2163e-11	3.49912e-07	3.19188e-10	3.27951e-10	6.01287e-09	-1.04326e-13	3.48162e-07	1.17079e-10	0.0172703	-2.99647e-07	0.000916779	0.000336276
2022-03-15 10:50:22	4037576	1.11376e-08	-4.75866e-11	3.5663e-07	3.47933e-10	3.39292e-10	7.21716e-09	-9.51732e-14	3.54847e-07	1.21127e-10	0.0203388	-2.68209e-07	0.000980516	0.000341351
2022-03-15 10:50:34	4049989	1.20143e-08	-4.67368e-11	3.60124e-07	3.65961e-10	3.52538e-10	7.78527e-09	-9.34736e-14	3.58323e-07	1.25856e-10	0.0217269	-2.60864e-07	0.00102131	0.000351236
2022-03-15 10:50:47	4062400	1.26265e-08	-5.74561e-11	3.60034e-07	3.82667e-10	3.61544e-10	8.18197e-09	-1.14912e-13	3.58234e-07	1.29071e-10	0.0228398	-3.20774e-07	0.0010682	0.000360299
2022-03-15 10:50:59	4074814	1.27615e-08	-4.14642e-11	3.57705e-07	3.85687e-10	3.54204e-10	8.26945e-09	-8.29284e-14	3.55916e-07	1.26451e-10	0.0232342	-2.33e-07	0.00108364	0.000355282
2022-03-15 10:51:12	4087226	1.29758e-08	-5.00232e-11	3.55376e-07	3.8186e-10	3.65291e-10	8.40832e-09	-1.00046e-13	3.53599e-07	1.30409e-10	0.0237792	-2.82937e-07	0.00107992	0.000368804
2022-03-15 10:51:24	4099639	1.28723e-08	-3.58537e-11	3.53226e-07	3.81946e-10	3.42939e-10	8.34125e-09	-7.17074e-14	3.5146e-07	1.22429e-10	0.0237332	-2.04027e-07	0.00108674	0.000348345
2022-03-15 10:51:37	4112051	1.31404e-08	-4.74228e-11	3.5233e-07	3.93847e-10	3.52637e-10	8.51498e-09	-9.48456e-14	3.50568e-07	1.25891e-10	0.0242891	-2.70548e-07	0.00112345	0.000359107
2022-03-15 10:51:49	4124464	1.27447e-08	-4.78118e-11	3.54212e-07	3.66864e-10	3.24404e-10	8.25857e-09	-9.56236e-14	3.52441e-07	1.15812e-10	0.0234325	-2.71318e-07	0.00104092	0.0003286
2022-03-15 10:52:01	4136876	1.0629e-08	-5.20094e-11	3.96316e-07	3.01193e-10	2.91478e-10	6.88759e-09	-1.04019e-13	3.94334e-07	1.04058e-10	0.0174664	-2.63783e-07	0.000763801	0.000263882
2022-03-15 10:52:14	4149799	5.93614e-09	-6.1152e-11	3.32084e-07	1.42802e-10	2.65294e-10	3.84662e-09	-1.22304e-13	3.30424e-07	9.471e-11	0.0116415	-3.70143e-07	0.000432179	0.000286632
2022-03-15 10:52:27	4162742	3.79472e-09	-5.16306e-11	3.30741e-07	6.49944e-11	2.49008e-10	2.45898e-09	-1.03261e-13	3.29087e-07	8.88959e-11	0.00747212	-3.13781e-07	0.000197499	0.000270128
2022-03-15 10:52:40	4175686	2.46588e-09	-6.05991e-11	3.31637e-07	3.82054e-11	2.26594e-10	1.59789e-09	-1.21198e-13	3.29979e-07	8.08941e-11	0.0048424	-3.67291e-07	0.000115781	0.000245149
2022-03-15 10:52:53	4188629	1.64989e-09	-6.41312e-11	3.44716e-07	-1.91349e-12	2.10009e-10	1.06913e-09	-1.28262e-13	3.42992e-07	7.49732e-11	0.00311706	-3.73951e-07	-5.57881e-06	0.000218586
2022-03-15 10:53:06	4201570	1.14968e-09	-6.9967e-11	3.58243e-07	-2.89819e-11	2.17334e-10	7.44993e-10	-1.39934e-13	3.56452e-07	7.75882e-11	0.00209002	-3.92575e-07	-8.13066e-05	0.000217668
2022-03-15 10:53:20	4215554	7.3461e-10	-6.0763e-11	3.71501e-07	-4.19786e-11	1.75654e-10	4.76027e-10	-1.21526e-13	3.69643e-07	6.27085e-11	0.0012878	-3.28765e-07	-0.000113565	0.000169646
2022-03-15 10:53:35	4230707	4.90091e-10	-7.25777e-11	3.77413e-07	-4.70741e-11	1.89092e-10	3.17579e-10	-1.45155e-13	3.75526e-07	6.75058e-11	0.000845691	-3.86539e-07	-0.000125355	0.000179763
2022-03-15 10:53:50	4245861	3.29153e-10	-6.94141e-11	3.30383e-07	-6.40806e-11	2.49369e-10	2.13291e-10	-1.38828e-13	3.28731e-07	8.90247e-11	0.000648832	-4.22315e-07	-0.000194933	0.000270813
2022-03-15 10:54:06	4261014	2.59214e-10	-6.85746e-11	1.95112e-07	-6.16619e-11	2.18094e-10	1.67971e-10	-1.37149e-13	1.94136e-07	7.78596e-11	0.00086522	-7.06458e-07	-0.000317621	0.000401056
2022-03-15 10:54:21	4276166	1.80535e-10	-5.47328e-11	1.0741e-07	-6.48761e-11	2.29228e-10	1.16987e-10	-1.09466e-13	1.06873e-07	8.18344e-11	0.00109463	-1.02426e-06	-0.000607039	0.000765717
2022-03-15 10:54:36	4291319	1.37524e-10	-7.03253e-11	5.80118e-08	-6.40484e-11	2.50397e-10	8.91156e-11	-1.40651e-13	5.77217e-08	8.93917e-11	0.00154388	-2.4367e-06	-0.00110961	0.00154867
2022-03-15 10:54:51	4306982	1.15465e-10	-5.76404e-11	3.3275e-08	-7.01866e-11	2.44754e-10	7.48213e-11	-1.15281e-13	3.31086e-08	8.73772e-11	0.00225987	-3.4819e-06	-0.00211989	0.00263911
2022-03-15 10:55:07	4322386	9.9921e-11	-4.87537e-11	2.04596e-08	-7.16271e-11	2.42281e-10	6.47488e-11	-9.75074e-14	2.03573e-08	8.64943e-11	0.00318062	-4.7898e-06	-0.0035185	0.00424881
2022-03-15 10:55:22	4337789	6.68541e-11	-5.68315e-11	1.38456e-08	-7.44543e-11	2.39018e-10	4.33215e-11	-1.13663e-13	1.37764e-08	8.53294e-11	0.00314462	-8.25058e-06	-0.00540449	0.0061939
2022-03-15 10:55:38	4353191	6.80258e-11	-4.8508e-11	1.03278e-08	-7.18636e-11	2.24859e-10	4.40807e-11	-9.7016e-14	1.02762e-08	8.02747e-11	0.00428961	-9.44088e-06	-0.00699323	0.00781174
2022-03-15 10:55:53	4368594	4.21829e-11	-6.85644e-11	8.51142e-09	-8.03776e-11	2.24414e-10	2.73345e-11	-1.37129e-13	8.46886e-09	8.01158e-11	0.00322765	-1.61921e-05	-0.00949096	0.00946004
2022-03-15 10:56:08	4383997	5.23094e-11	-4.7822e-11	7.44481e-09	-7.42823e-11	2.16029e-10	3.38965e-11	-9.5644e-14	7.40759e-09	7.71224e-11	0.00457592	-1.29116e-05	-0.0100279	0.0104113
2022-03-15 10:56:25	4400441	3.12502e-11	-5.24291e-11	6.88489e-09	-7.23688e-11	2.25004e-10	2.02501e-11	-1.04858e-13	6.85047e-09	8.03264e-11	0.00295602	-1.53067e-05	-0.0105641	0.0117257
2022-03-15 10:56:41	4416374	2.92507e-11	-4.91018e-11	6.54552e-09	-7.65506e-11	2.22977e-10	1.89545e-11	-9.82036e-14	6.51279e-09	7.96028e-11	0.00291034	-1.50786e-05	-0.0117539	0.0122225
2022-03-15 10:56:57	4432307	2.56709e-11	-4.65525e-11	6.34528e-09	-8.94721e-11	2.27784e-10	1.66347e-11	-9.3105e-14	6.31355e-09	8.13189e-11	0.00263477	-1.47468e-05	-0.0141714	0.0128801
2022-03-15 10:57:13	4448241	1.91672e-11	-5.9217e-11	6.22458e-09	-8.61718e-11	2.20958e-10	1.24203e-11	-1.18434e-13	6.19346e-09	7.8882e-11	0.0020054	-1.91224e-05	-0.0139134	0.0127363
2022-03-15 10:57:29	4464174	7.54648e-12	-5.18456e-11	6.13468e-09	-7.78298e-11	2.04111e-10	4.89012e-12	-1.03691e-13	6.10401e-09	7.28676e-11	0.000801133	-1.69874e-05	-0.0127506	0.0119377
2022-03-15 10:57:45	4480107	2.71974e-12	-5.57872e-11	6.06892e-09	-8.10441e-11	1.91411e-10	1.76239e-12	-1.11574e-13	6.03858e-09	6.83337e-11	0.000291856	-1.84769e-05	-0.0134211	0.0113162
2022-03-15 10:58:01	4496041	-3.13899e-12	-5.70158e-11	6.01298e-09	-7.77976e-11	1.8675e-10	-2.03407e-12	-1.14032e-13	5.98292e-09	6.66697e-11	-0.000339979	-1.90595e-05	-0.0130033	0.0111434
2022-03-15 10:58:16	4511974	-5.11699e-12	-5.54391e-11	5.98972e-09	-8.48496e-11	2.17349e-10	-3.31581e-12	-1.10878e-13	5.95977e-09	7.75936e-11	-0.000556365	-1.86044e-05	-0.0142371	0.0130196
2022-03-15 10:58:32	4527907	1.97799e-12	-6.19506e-11	5.94873e-09	-8.57848e-11	1.98514e-10	1.28174e-12	-1.23901e-13	5.91899e-09	7.08695e-11	0.000216547	-2.09328e-05	-0.0144932	0.0119732
2022-03-15 10:58:48	4543841	-1.10939e-11	-6.14694e-11	5.9331e-09	-8.04313e-11	2.03213e-10	-7.18885e-12	-1.22939e-13	5.90343e-09	7.2547e-11	-0.00121774	-2.0825e-05	-0.0136245	0.012289
2022-03-15 10:59:04	4559774	-7.05198e-12	-6.19096e-11	5.93106e-09	-8.04098e-11	1.95703e-10	-4.56968e-12	-1.23819e-13	5.9014e-09	6.9866e-11	-0.000774338	-2.09813e-05	-0.0136255	0.0118389
2022-03-15 10:59:20	4575707	-1.22764e-11	-4.97468e-11	5.89281e-09	-8.64298e-11	2.02061e-10	-7.95511e-12	-9.94936e-14	5.86335e-09	7.21358e-11	-0.00135675	-1.69687e-05	-0.0147407	0.0123028
2022-03-15 10:59:36	4591641	-1.53187e-11	-6.20734e-11	5.88579e-09	-9.76958e-11	1.93806e-10	-9.92652e-12	-1.24147e-13	5.85636e-09	6.91887e-11	-0.001695	-2.11986e-05	-0.016682	0.0118143
2022-03-15 10:59:52	4607574	-1.53724e-11	-6.4203e-11	5.84424e-09	-9.03751e-11	1.83779e-10	-9.96132e-12	-1.28406e-13	5.81502e-09	6.56091e-11	-0.00171303	-2.20818e-05	-0.0155417	0.0112827
2022-03-15 11:00:08	4623506	-1.59314e-11	-6.15309e-11	5.8419e-09	-8.12053e-11	1.81045e-10	-1.03235e-11	-1.23062e-13	5.81269e-09	6.46331e-11	-0.00177604	-2.11712e-05	-0.0139703	0.0111193
2022-03-15 11:00:24	4639439	-1.72752e-11	-5.78451e-11	5.83908e-09	-9.14823e-11	1.83011e-10	-1.11943e-11	-1.1569e-13	5.80988e-09	6.53349e-11	-0.00192677	-1.99127e-05	-0.015746	0.0112455
2022-03-15 11:00:40	4655371	-2.07474e-11	-6.29642e-11	5.82426e-09	-8.96011e-11	1.85299e-10	-1.34443e-11	-1.25928e-13	5.79514e-09	6.61517e-11	-0.00231993	-2.173e-05	-0.0154614	0.011415
2022-03-15 11:00:56	4671304	-1.71569e-11	-5.90942e-11	5.79843e-09	-9.08911e-11	1.83924e-10	-1.11177e-11	-1.18188e-13	5.76944e-09	6.56609e-11	-0.00192699	-2.04853e-05	-0.0157539	0.0113808
2022-03-15 11:01:12	4687236	-2.45314e-11	-5.51934e-11	5.77378e-09	-8.67416e-11	1.85506e-10	-1.58963e-11	-1.10387e-13	5.74491e-09	6.62256e-11	-0.00276703	-1.92147e-05	-0.0150989	0.0115277
2022-03-15 11:01:28	4703169	-2.85734e-11	-5.88075e-11	5.7489e-09	-8.86443e-11	1.8632e-10	-1.85156e-11	-1.17615e-13	5.72016e-09	6.65162e-11	-0.0032369	-2.05615e-05	-0.0154968	0.0116284
2022-03-15 11:01:44	4719101	-2.67352e-11	-5.63401e-11	5.74464e-09	-8.81498e-11	1.91734e-10	-1.73244e-11	-1.1268e-13	5.71592e-09	6.8449e-11	-0.00303091	-1.97134e-05	-0.0154218	0.0119752
2022-03-15 11:02:00	4735034	-3.24111e-11	-6.80934e-11	5.74668e-09	-9.43848e-11	1.81705e-10	-2.10024e-11	-1.36187e-13	5.71795e-09	6.48687e-11	-0.00367307	-2.38174e-05	-0.0165068	0.0113448
2022-03-15 11:02:15	4750966	-3.36581e-11	-5.33813e-11	5.72732e-09	-8.97946e-11	1.84761e-10	-2.18104e-11	-1.06763e-13	5.69868e-09	6.59597e-11	-0.00382728	-1.87346e-05	-0.0157571	0.0115745
2022-03-15 11:02:31	4766899	-4.11079e-11	-6.3947e-11	5.72121e-09	-9.27831e-11	1.84224e-10	-2.66379e-11	-1.27894e-13	5.6926e-09	6.5768e-11	-0.00467939	-2.24667e-05	-0.0162989	0.0115532
2022-03-15 11:02:47	4782832	-3.59264e-11	-5.77018e-11	5.71444e-09	-9.36216e-11	1.6806e-10	-2.32803e-11	-1.15404e-13	5.68587e-09	5.99974e-11	-0.00409442	-2.02966e-05	-0.0164657	0.010552
2022-03-15 11:03:03	4798766	-3.64531e-11	-5.93091e-11	5.69279e-09	-9.14501e-11	1.78127e-10	-2.36216e-11	-1.18618e-13	5.66433e-09	6.35913e-11	-0.00417024	-2.09413e-05	-0.0161449	0.0112266
2022-03-15 11:03:19	4814699	-3.87321e-11	-5.82239e-11	5.6859e-09	-8.67523e-11	1.83947e-10	-2.50984e-11	-1.16448e-13	5.65747e-09	6.56691e-11	-0.00443633	-2.0583e-05	-0.0153341	0.0116075
2022-03-15 11:03:35	4830631	-3.94201e-11	-6.2872e-11	5.69011e-09	-8.33016e-11	1.89729e-10	-2.55442e-11	-1.25744e-13	5.66166e-09	6.77333e-11	-0.00451179	-2.22097e-05	-0.0147133	0.0119635
2022-03-15 11:03:51	4846564	-4.14626e-11	-6.31996e-11	5.69851e-09	-9.14501e-11	1.8397e-10	-2.68678e-11	-1.26399e-13	5.67002e-09	6.56773e-11	-0.00473857	-2.22926e-05	-0.0161287	0.0115833
2022-03-15 11:04:07	4862496	-5.49969e-11	-6.96393e-11	5.68258e-09	-9.25466e-11	1.76699e-10	-3.5638e-11	-1.39279e-13	5.65417e-09	6.30815e-11	-0.00630296	-2.46329e-05	-0.0163679	0.0111566
2022-03-15 11:04:23	4878429	-4.92994e-11	-5.56747e-11	5.67976e-09	-8.72468e-11	1.72736e-10	-3.1946e-11	-1.11349e-13	5.65136e-09	6.16668e-11	-0.0056528	-1.97031e-05	-0.0154382	0.0109118
2022-03-15 11:04:39	4894361	-4.33869e-11	-6.80831e-11	5.69193e-09	-8.92141e-11	1.58416e-10	-2.81147e-11	-1.36166e-13	5.66347e-09	5.65545e-11	-0.00496422	-2.40429e-05	-0.0157526	0.00998584
2022-03-15 11:04:55	4910294	-4.30859e-11	-5.61047e-11	5.65337e-09	-9.85128e-11	1.74418e-10	-2.79197e-11	-1.12209e-13	5.6251e-09	6.22672e-11	-0.0049634	-1.9948e-05	-0.0175131	0.0110695
2022-03-15 11:05:11	4926227	-4.25376e-11	-7.14925e-11	5.66682e-09	-1.04231e-10	1.76076e-10	-2.75644e-11	-1.42985e-13	5.63849e-09	6.28591e-11	-0.00488861	-2.53588e-05	-0.0184856	0.0111482
2022-03-15 11:05:27	4942161	-4.29461e-11	-6.44896e-11	5.63685e-09	-9.22778e-11	1.65035e-10	-2.78291e-11	-1.28979e-13	5.60867e-09	5.89175e-11	-0.0049618	-2.29964e-05	-0.0164527	0.0105047
2022-03-15 11:05:43	4958094	-4.89446e-11	-7.38779e-11	5.6383e-09	-9.34281e-11	1.68744e-10	-3.17161e-11	-1.47756e-13	5.61011e-09	6.02416e-11	-0.00565338	-2.63374e-05	-0.0166535	0.010738
2022-03-15 11:05:59	4974027	-4.12154e-11	-7.17893e-11	5.713e-09	-9.48256e-11	1.69281e-10	-2.67076e-11	-1.43579e-13	5.68443e-09	6.04333e-11	-0.00469837	-2.52582e-05	-0.0166816	0.0106314
2022-03-15 11:06:14	4989961	-5.32984e-11	-6.12236e-11	5.65325e-09	-9.41053e-11	1.56611e-10	-3.45374e-11	-1.22447e-13	5.62498e-09	5.59101e-11	-0.00613999	-2.17685e-05	-0.0167299	0.00993961
2022-03-15 11:06:30	5005894	-4.18819e-11	-6.43974e-11	5.66057e-09	-9.87278e-11	1.49041e-10	-2.71395e-11	-1.28795e-13	5.63227e-09	5.32076e-11	-0.00481857	-2.28673e-05	-0.017529	0.00944693
2022-03-15 11:06:46	5021826	-3.48836e-11	-7.02434e-11	5.65547e-09	-9.32346e-11	1.9869e-10	-2.26046e-11	-1.40487e-13	5.62719e-09	7.09323e-11	-0.00401702	-2.49657e-05	-0.0165686	0.0126053
2022-03-15 11:07:02	5037759	-6.36829e-11	-6.76122e-11	6.11017e-09	-1.03232e-10	1.65135e-10	-4.12665e-11	-1.35224e-13	6.07962e-09	5.89532e-11	-0.00678768	-2.22422e-05	-0.01698	0.00969686
2022-03-15 11:07:18	5053691	-4.41394e-11	-6.67215e-11	5.27348e-09	-1.04307e-10	1.63046e-10	-2.86023e-11	-1.33443e-13	5.24711e-09	5.82074e-11	-0.00545106	-2.54317e-05	-0.0198789	0.0110932
2022-03-15 11:07:34	5069624	-4.33009e-11	-7.34479e-11	5.22516e-09	-9.04718e-11	1.56865e-10	-2.8059e-11	-1.46896e-13	5.19903e-09	5.60008e-11	-0.00539696	-2.82544e-05	-0.0174017	0.0107714
2022-03-15 11:07:50	5085557	-5.50721e-11	-6.58512e-11	5.44459e-09	-9.45353e-11	1.60381e-10	-3.56867e-11	-1.31702e-13	5.41737e-09	5.7256e-11	-0.00658747	-2.43111e-05	-0.0174504	0.010569
2022-03-15 11:08:06	5101490	-4.80954e-11	-6.48991e-11	5.61274e-09	-1.02984e-10	1.54392e-10	-3.11658e-11	-1.29798e-13	5.58468e-09	5.51179e-11	-0.0055806	-2.32418e-05	-0.0184405	0.0098695
2022-03-15 11:08:22	5117424	-5.16536e-11	-6.2872e-11	5.70111e-09	-9.29228e-11	1.79901e-10	-3.34715e-11	-1.25744e-13	5.6726e-09	6.42247e-11	-0.00590056	-2.21669e-05	-0.016381	0.0113219
2022-03-15 11:08:38	5133357	-4.00759e-11	-6.1541e-11	3.13216e-08	-1.04694e-10	1.73612e-10	-2.59692e-11	-1.23082e-13	3.1165e-08	6.19795e-11	-0.000833281	-3.94937e-06	-0.00335935	0.00198875
2022-03-15 11:08:54	5149801	-4.11294e-11	-6.6445e-11	1.52112e-07	-9.31163e-11	1.50192e-10	-2.66519e-11	-1.3289e-13	1.51351e-07	5.36185e-11	-0.000176092	-8.78023e-07	-0.000615232	0.000354265
2022-03-15 11:09:10	5165464	-4.10756e-11	-6.70696e-11	2.67047e-07	-8.09581e-11	1.3783e-10	-2.6617e-11	-1.34139e-13	2.65712e-07	4.92053e-11	-0.000100172	-5.0483e-07	-0.000304684	0.000185183
2022-03-15 11:09:25	5180616	-3.93771e-11	-8.41774e-11	3.12107e-07	-9.87063e-11	1.31434e-10	-2.55164e-11	-1.68355e-13	3.10546e-07	4.69219e-11	-8.2166e-05	-5.42124e-07	-0.000317847	0.000151095
2022-03-15 11:09:40	5195769	-5.25244e-11	-7.59768e-11	3.54749e-07	-8.70211e-11	1.18679e-10	-3.40358e-11	-1.51954e-13	3.52975e-07	4.23684e-11	-9.64255e-05	-4.30494e-07	-0.000246536	0.000120032
2022-03-15 11:09:55	5210921	-6.06406e-11	-7.7277e-11	3.76966e-07	-8.65051e-11	1.25375e-10	-3.92951e-11	-1.54554e-13	3.75081e-07	4.47589e-11	-0.000104764	-4.12055e-07	-0.00023063	0.000119331
2022-03-15 11:10:11	5226074	-4.99551e-11	-7.95089e-11	3.90493e-07	-8.65803e-11	1.22326e-10	-3.23709e-11	-1.59018e-13	3.88541e-07	4.36704e-11	-8.33141e-05	-4.0927e-07	-0.000222835	0.000112396
2022-03-15 11:10:26	5241227	-6.21564e-11	-7.31408e-11	3.81803e-07	-8.84508e-11	1.33637e-10	-4.02773e-11	-1.46282e-13	3.79894e-07	4.77084e-11	-0.000106023	-3.85059e-07	-0.00023283	0.000125583
2022-03-15 11:10:41	5256381	6.96695e-10	-6.54008e-11	3.85655e-07	5.68566e-11	2.36991e-10	4.51458e-10	-1.30802e-13	3.83727e-07	8.46058e-11	0.00117651	-3.40872e-07	0.00014817	0.000220484
2022-03-15 11:10:59	5274785	7.67158e-09	-6.5626e-11	3.72576e-07	2.46583e-10	2.97336e-10	4.97118e-09	-1.31252e-13	3.70713e-07	1.06149e-10	0.0134098	-3.54053e-07	0.000665159	0.000286337
2022-03-15 11:11:12	5287727	9.37579e-09	-6.29642e-11	3.51703e-07	3.05966e-10	3.03379e-10	6.07551e-09	-1.25928e-13	3.49944e-07	1.08306e-10	0.0173614	-3.59853e-07	0.000874327	0.000309496
2022-03-15 11:11:26	5301711	1.1108e-08	-5.98313e-11	3.55107e-07	3.32733e-10	3.15443e-10	7.19798e-09	-1.19663e-13	3.53331e-07	1.12613e-10	0.0203718	-3.3867e-07	0.000941702	0.000318718
2022-03-15 11:11:39	5314124	1.17792e-08	-6.77658e-11	3.56541e-07	3.44483e-10	3.06643e-10	7.63292e-09	-1.35532e-13	3.54758e-07	1.09472e-10	0.0215158	-3.82039e-07	0.000971036	0.000308581
2022-03-15 11:11:51	5326535	1.24168e-08	-6.03739e-11	3.55287e-07	3.56415e-10	3.20204e-10	8.04609e-09	-1.20748e-13	3.53511e-07	1.14313e-10	0.0227605	-3.41568e-07	0.00100822	0.000323365
2022-03-15 11:12:03	5338949	1.25149e-08	-6.13874e-11	3.51524e-07	3.55845e-10	3.27237e-10	8.10966e-09	-1.22775e-13	3.49766e-07	1.16824e-10	0.0231859	-3.51019e-07	0.00101738	0.000334005
2022-03-15 11:12:16	5351361	1.27252e-08	-5.16613e-11	3.50987e-07	3.61167e-10	3.20249e-10	8.24593e-09	-1.03323e-13	3.49232e-07	1.14329e-10	0.0236116	-2.95857e-07	0.00103417	0.000327372
2022-03-15 11:12:28	5363774	1.27057e-08	-5.91044e-11	3.49374e-07	3.80377e-10	3.20026e-10	8.23329e-09	-1.18209e-13	3.47627e-07	1.14249e-10	0.0236843	-3.40045e-07	0.00109421	0.000328655
2022-03-15 11:12:41	5376186	1.27514e-08	-5.8869e-11	3.48478e-07	3.59608e-10	3.06451e-10	8.26291e-09	-1.17738e-13	3.46736e-07	1.09403e-10	0.0238306	-3.39561e-07	0.00103712	0.000315523
2022-03-15 11:12:53	5388599	1.20379e-08	-6.96803e-11	3.5242e-07	3.23961e-10	2.87592e-10	7.80056e-09	-1.39361e-13	3.50658e-07	1.0267e-10	0.0222455	-3.97426e-07	0.000923866	0.000292793
2022-03-15 11:13:06	5401011	9.95512e-09	-6.65987e-11	3.59138e-07	1.95133e-10	2.44339e-10	6.45092e-09	-1.33197e-13	3.57342e-07	8.7229e-11	0.0180525	-3.72745e-07	0.000546067	0.000244105
2022-03-15 11:13:18	5413934	5.08687e-09	-7.2762e-11	3.27068e-07	9.91363e-11	2.41713e-10	3.29629e-09	-1.45524e-13	3.25433e-07	8.62915e-11	0.010129	-4.47171e-07	0.000304629	0.000265159
2022-03-15 11:13:31	5426877	3.27847e-09	-6.61277e-11	3.26262e-07	3.43999e-11	2.18424e-10	2.12445e-09	-1.32255e-13	3.24631e-07	7.79774e-11	0.0065442	-4.07403e-07	0.000105966	0.000240203
2022-03-15 11:13:44	5439820	2.11132e-09	-7.56184e-11	3.31905e-07	1.19647e-11	2.04656e-10	1.36814e-09	-1.51237e-13	3.30245e-07	7.30622e-11	0.00414278	-4.57953e-07	3.62297e-05	0.000221236
2022-03-15 11:13:57	5452764	1.45547e-09	-7.87615e-11	3.46149e-07	-2.18977e-11	1.94974e-10	9.43145e-10	-1.57523e-13	3.44418e-07	6.96057e-11	0.00273837	-4.5736e-07	-6.35788e-05	0.000202096
2022-03-15 11:14:10	5465706	9.98834e-10	-7.12468e-11	3.59408e-07	-4.04629e-11	1.7117e-10	6.47244e-10	-1.42494e-13	3.57611e-07	6.11077e-11	0.00180991	-3.9846e-07	-0.000113148	0.000170878
2022-03-15 11:14:24	5479689	6.37753e-10	-8.0246e-11	3.70695e-07	-5.44916e-11	1.6267e-10	4.13264e-10	-1.60492e-13	3.68842e-07	5.80732e-11	0.00112044	-4.35125e-07	-0.000147737	0.000157448
2022-03-15 11:14:39	5494842	4.18819e-10	-7.97649e-11	3.75532e-07	-5.95011e-11	1.72767e-10	2.71395e-10	-1.5953e-13	3.73654e-07	6.16778e-11	0.000726326	-4.26945e-07	-0.000159241	0.000165067
2022-03-15 11:14:54	5509995	2.8539e-10	-8.1577e-11	2.94459e-07	-7.88511e-11	1.89138e-10	1.84933e-10	-1.63154e-13	2.92987e-07	6.75223e-11	0.000631198	-5.56865e-07	-0.000269129	0.000230462
2022-03-15 11:15:10	5525149	2.01282e-10	-7.27825e-11	1.67968e-07	-8.06678e-11	2.19676e-10	1.30431e-10	-1.45565e-13	1.67128e-07	7.84243e-11	0.000780423	-8.70978e-07	-0.00048267	0.000469247
2022-03-15 11:15:25	5540300	1.56906e-10	-7.83315e-11	9.21808e-08	-7.92381e-11	2.23469e-10	1.01675e-10	-1.56663e-13	9.17199e-08	7.97784e-11	0.00110854	-1.70806e-06	-0.000863914	0.000869805
2022-03-15 11:15:40	5555454	1.13831e-10	-7.4697e-11	5.02213e-08	-8.80638e-11	2.24736e-10	7.37625e-11	-1.49394e-13	4.99702e-08	8.02308e-11	0.00147613	-2.98966e-06	-0.00176233	0.00160557
2022-03-15 11:15:56	5571117	9.45676e-11	-7.06427e-11	2.91839e-08	-9.51158e-11	2.14116e-10	6.12798e-11	-1.41285e-13	2.9038e-08	7.64394e-11	0.00211033	-4.86554e-06	-0.00327557	0.00263239
2022-03-15 11:16:11	5586521	6.92943e-11	-7.85363e-11	1.8322e-08	-1.02576e-10	2.16904e-10	4.49027e-11	-1.57073e-13	1.82304e-08	7.74347e-11	0.00246307	-8.61598e-06	-0.00562665	0.00424756
2022-03-15 11:16:26	5601924	5.22234e-11	-7.26187e-11	1.27313e-08	-9.15468e-11	2.10592e-10	3.38408e-11	-1.45237e-13	1.26676e-08	7.51813e-11	0.00267143	-1.14652e-05	-0.00722682	0.00593491
2022-03-15 11:16:42	5617326	6.01354e-11	-7.50655e-11	9.7785e-09	-9.92653e-11	2.14063e-10	3.89677e-11	-1.50131e-13	9.72961e-09	7.64205e-11	0.00400507	-1.54303e-05	-0.0102024	0.00785443
2022-03-15 11:16:57	5632729	2.73694e-11	-7.69084e-11	8.15763e-09	-9.78893e-11	2.03551e-10	1.77354e-11	-1.53817e-13	8.11684e-09	7.26677e-11	0.00218501	-1.89503e-05	-0.01206	0.00895271
2022-03-15 11:17:13	5648131	1.58669e-11	-7.85363e-11	7.23342e-09	-1.00598e-10	2.14193e-10	1.02818e-11	-1.57073e-13	7.19725e-09	7.64669e-11	0.00142857	-2.1824e-05	-0.0139773	0.0106245
2022-03-15 11:17:29	5664574	4.06349e-12	-7.43591e-11	6.76244e-09	-1.00609e-10	2.02468e-10	2.63314e-12	-1.48718e-13	6.72863e-09	7.22811e-11	0.000391334	-2.21023e-05	-0.0149524	0.0107423
2022-03-15 11:17:45	5680506	2.80574e-12	-7.38165e-11	6.46002e-09	-9.75238e-11	2.02744e-10	1.81812e-12	-1.47633e-13	6.42772e-09	7.23796e-11	0.000282856	-2.29682e-05	-0.0151724	0.0112605
2022-03-15 11:18:01	5696439	-8.55698e-12	-6.95984e-11	6.302e-09	-9.16973e-11	1.92117e-10	-5.54492e-12	-1.39197e-13	6.27049e-09	6.85858e-11	-0.000884289	-2.21987e-05	-0.0146236	0.0109379
2022-03-15 11:18:17	5712372	-1.18894e-11	-7.65296e-11	6.18388e-09	-9.33528e-11	2.00272e-10	-7.70433e-12	-1.53059e-13	6.15296e-09	7.14971e-11	-0.00125213	-2.48757e-05	-0.015172	0.01162
2022-03-15 11:18:33	5728306	-1.35342e-11	-7.95908e-11	6.11443e-09	-9.54598e-11	1.61603e-10	-8.77016e-12	-1.59182e-13	6.08386e-09	5.76923e-11	-0.00144155	-2.61646e-05	-0.0156907	0.00948284
2022-03-15 11:18:49	5744239	-1.27279e-11	-6.44896e-11	6.06433e-09	-1.01049e-10	1.92609e-10	-8.24768e-12	-1.28979e-13	6.03401e-09	6.87614e-11	-0.00136687	-2.13754e-05	-0.0167466	0.0113956
2022-03-15 11:19:05	5760172	-2.45099e-11	-8.4413e-11	6.00905e-09	-1.05908e-10	1.65634e-10	-1.58824e-11	-1.68826e-13	5.979e-09	5.91313e-11	-0.00265636	-2.82365e-05	-0.0177133	0.00988983
2022-03-15 11:19:21	5776106	-2.15214e-11	-7.41134e-11	5.99282e-09	-1.05328e-10	1.76e-10	-1.39459e-11	-1.48227e-13	5.96286e-09	6.2832e-11	-0.00233879	-2.48584e-05	-0.017664	0.0105372
2022-03-15 11:19:37	5792039	-1.91779e-11	-7.98979e-11	5.97208e-09	-1.02834e-10	1.83134e-10	-1.24273e-11	-1.59796e-13	5.94222e-09	6.53788e-11	-0.00209135	-2.68916e-05	-0.0173057	0.0110024
2022-03-15 11:19:52	5807972	-2.14569e-11	-8.68598e-11	5.96303e-09	-9.9491e-11	1.70026e-10	-1.39041e-11	-1.7372e-13	5.93321e-09	6.06993e-11	-0.00234343	-2.92792e-05	-0.0167685	0.0102304
2022-03-15 11:20:08	5823906	-4.09251e-11	-7.78093e-11	5.94567e-09	-1.11649e-10	1.82227e-10	-2.65195e-11	-1.55619e-13	5.91594e-09	6.5055e-11	-0.00448271	-2.6305e-05	-0.0188726	0.0109966
2022-03-15 11:20:24	5839839	-4.37846e-11	-7.6673e-11	5.90645e-09	-1.02124e-10	1.77482e-10	-2.83724e-11	-1.53346e-13	5.87692e-09	6.33611e-11	-0.00482777	-2.60929e-05	-0.0173771	0.0107813
2022-03-15 11:20:40	5855772	-3.86139e-11	-7.0356e-11	5.88222e-09	-9.84483e-11	1.71393e-10	-2.50218e-11	-1.40712e-13	5.85281e-09	6.11873e-11	-0.00427518	-2.40418e-05	-0.0168207	0.0104543
2022-03-15 11:20:56	5871706	-4.81491e-11	-7.87512e-11	5.85775e-09	-1.05038e-10	1.74886e-10	-3.12006e-11	-1.57502e-13	5.82846e-09	6.24343e-11	-0.00535315	-2.7023e-05	-0.0180216	0.010712
2022-03-15 11:21:12	5887639	-4.22151e-11	-8.31741e-11	5.85729e-09	-1.06779e-10	1.63768e-10	-2.73554e-11	-1.66348e-13	5.828e-09	5.84652e-11	-0.00469378	-2.85429e-05	-0.0183217	0.0100318
2022-03-15 11:21:28	5903572	-4.58164e-11	-8.2437e-11	5.83957e-09	-1.04457e-10	1.61664e-10	-2.9689e-11	-1.64874e-13	5.81037e-09	5.7714e-11	-0.00510966	-2.83758e-05	-0.0179777	0.00993293
2022-03-15 11:21:44	5919505	-4.75794e-11	-7.70108e-11	5.80136e-09	-1.07908e-10	1.55221e-10	-3.08315e-11	-1.54022e-13	5.77235e-09	5.54139e-11	-0.00534123	-2.66826e-05	-0.0186939	0.00959988
2022-03-15 11:22:00	5935439	-3.24972e-11	-7.1001e-11	5.79977e-09	-1.10552e-10	1.63154e-10	-2.10582e-11	-1.42002e-13	5.77077e-09	5.8246e-11	-0.00364911	-2.46071e-05	-0.0191572	0.0100933
2022-03-15 11:22:16	5951372	-4.29139e-11	-7.88434e-11	5.78912e-09	-1.0464e-10	1.65135e-10	-2.78082e-11	-1.57687e-13	5.76017e-09	5.89532e-11	-0.00482767	-2.73754e-05	-0.0181661	0.0102346
2022-03-15 11:22:32	5967306	-4.97616e-11	-8.22117e-11	5.76822e-09	-1.0908e-10	1.63753e-10	-3.22455e-11	-1.64423e-13	5.73938e-09	5.84598e-11	-0.00561829	-2.86483e-05	-0.0190055	0.0101857
2022-03-15 11:22:48	5983239	-4.07746e-11	-7.15436e-11	5.76058e-09	-1.17626e-10	1.6204e-10	-2.64219e-11	-1.43087e-13	5.73178e-09	5.78483e-11	-0.00460973	-2.49638e-05	-0.0205217	0.0100926
2022-03-15 11:23:04	5999172	-5.36746e-11	-7.60074e-11	5.75827e-09	-9.99425e-11	1.59652e-10	-3.47811e-11	-1.52015e-13	5.72948e-09	5.69958e-11	-0.00607056	-2.6532e-05	-0.0174436	0.00994781
2022-03-15 11:23:20	6015106	-5.00734e-11	-8.26212e-11	5.73542e-09	-1.03866e-10	1.4957e-10	-3.24476e-11	-1.65242e-13	5.70674e-09	5.33965e-11	-0.00568583	-2.89556e-05	-0.0182006	0.00935674
2022-03-15 11:23:36	6031039	-5.81789e-11	-8.84058e-11	5.74295e-09	-1.12692e-10	1.50254e-10	-3.76999e-11	-1.76812e-13	5.71424e-09	5.36407e-11	-0.00659755	-3.09423e-05	-0.0197213	0.0093872
2022-03-15 11:23:51	6046972	-5.37929e-11	-7.41031e-11	5.7306e-09	-1.11219e-10	1.37177e-10	-3.48578e-11	-1.48206e-13	5.70195e-09	4.89722e-11	-0.00611332	-2.59922e-05	-0.0195054	0.00858868
2022-03-15 11:24:07	6062905	-6.97458e-11	-8.01539e-11	5.73843e-09	-1.22087e-10	1.59484e-10	-4.51953e-11	-1.60308e-13	5.70974e-09	5.69358e-11	-0.00791547	-2.80762e-05	-0.0213822	0.0099717
2022-03-15 11:24:23	6078839	-6.05439e-11	-8.26008e-11	5.72452e-09	-1.0751e-10	1.54791e-10	-3.92324e-11	-1.65202e-13	5.6959e-09	5.52604e-11	-0.00688784	-2.90036e-05	-0.018875	0.00970179
2022-03-15 11:24:39	6094772	-6.16511e-11	-8.94398e-11	5.71849e-09	-1.19443e-10	1.54177e-10	-3.99499e-11	-1.7888e-13	5.6899e-09	5.50412e-11	-0.0070212	-3.14381e-05	-0.0209921	0.00967349
2022-03-15 11:24:55	6110706	-5.82971e-11	-8.12391e-11	5.7121e-09	-1.08058e-10	1.69696e-10	-3.77765e-11	-1.62478e-13	5.68354e-09	6.05815e-11	-0.00664665	-2.85875e-05	-0.0190124	0.0106591
2022-03-15 11:25:11	6126639	-6.41881e-11	-7.58539e-11	5.72012e-09	-1.1152e-10	1.52557e-10	-4.15939e-11	-1.51708e-13	5.69152e-09	5.44628e-11	-0.00730805	-2.66551e-05	-0.0195941	0.00956912
2022-03-15 11:25:27	6142570	-5.81896e-11	-8.04201e-11	5.71974e-09	-1.08295e-10	1.61449e-10	-3.77069e-11	-1.6084e-13	5.69114e-09	5.76373e-11	-0.00662554	-2.82615e-05	-0.0190287	0.0101275
2022-03-15 11:25:43	6158504	-6.61768e-11	-8.50989e-11	5.69633e-09	-1.08639e-10	1.51996e-10	-4.28826e-11	-1.70198e-13	5.66785e-09	5.42626e-11	-0.00756593	-3.00286e-05	-0.0191676	0.00957375
2022-03-15 11:25:59	6174436	-5.67061e-11	-8.30922e-11	5.67134e-09	-1.20453e-10	1.28324e-10	-3.67456e-11	-1.66184e-13	5.64298e-09	4.58117e-11	-0.00651172	-2.94497e-05	-0.0213456	0.00811834
2022-03-15 11:26:15	6190369	-6.00924e-11	-7.72668e-11	5.69622e-09	-1.10789e-10	1.34566e-10	-3.89399e-11	-1.54534e-13	5.66774e-09	4.80401e-11	-0.00687044	-2.72655e-05	-0.0195473	0.00847605
2022-03-15 11:26:31	6206302	-7.35191e-11	-8.63684e-11	5.69293e-09	-1.10359e-10	1.43873e-10	-4.76404e-11	-1.72737e-13	5.66447e-09	5.13627e-11	-0.00841039	-3.04948e-05	-0.0194827	0.00906752
2022-03-15 11:26:47	6222236	-5.29006e-11	-7.48812e-11	5.69792e-09	-1.08789e-10	1.59253e-10	-3.42796e-11	-1.49762e-13	5.66943e-09	5.68533e-11	-0.00604639	-2.64158e-05	-0.0191887	0.010028
2022-03-15 11:27:03	6238169	-5.66631e-11	-8.70339e-11	5.70902e-09	-1.06682e-10	1.54746e-10	-3.67177e-11	-1.74068e-13	5.68047e-09	5.52443e-11	-0.00646384	-3.06432e-05	-0.0187805	0.0097253
2022-03-15 11:27:19	6254100	-6.85741e-11	-7.80039e-11	5.68138e-09	-1.16497e-10	1.71639e-10	-4.4436e-11	-1.56008e-13	5.65297e-09	6.12751e-11	-0.00786065	-2.75975e-05	-0.0206081	0.0108395
2022-03-15 11:27:35	6270034	-6.36076e-11	-7.72565e-11	5.66812e-09	-1.0822e-10	1.60919e-10	-4.12177e-11	-1.54513e-13	5.63978e-09	5.74481e-11	-0.00730839	-2.7397e-05	-0.0191887	0.0101862
2022-03-15 11:27:50	6285967	-6.99071e-11	-6.33839e-11	5.66988e-09	-1.06048e-10	1.68406e-10	-4.52998e-11	-1.26768e-13	5.64153e-09	6.01209e-11	-0.0080297	-2.24705e-05	-0.0187977	0.0106568
2022-03-15 11:28:06	6301900	-8.01626e-11	-8.98493e-11	5.55769e-09	-1.20034e-10	1.34206e-10	-5.19454e-11	-1.79699e-13	5.5299e-09	4.79115e-11	-0.00939354	-3.24958e-05	-0.0217064	0.00866409
2022-03-15 11:28:22	6317834	-5.77811e-11	-8.88665e-11	5.26418e-09	-1.1897e-10	1.34659e-10	-3.74422e-11	-1.77733e-13	5.23786e-09	4.80733e-11	-0.00714837	-3.39324e-05	-0.0227135	0.00917804
2022-03-15 11:28:38	6333765	-6.37259e-11	-7.62634e-11	5.29877e-09	-1.02157e-10	1.4213e-10	-4.12944e-11	-1.52527e-13	5.27228e-09	5.07404e-11	-0.00783236	-2.893e-05	-0.0193763	0.009624
2022-03-15 11:28:54	6349699	-6.59404e-11	-8.4546e-11	5.52837e-09	-1.12487e-10	1.59545e-10	-4.27294e-11	-1.69092e-13	5.50073e-09	5.69576e-11	-0.00776795	-3.07399e-05	-0.0204495	0.0103546
2022-03-15 11:29:10	6365631	-6.70046e-11	-8.07579e-11	5.6434e-09	-1.15411e-10	1.41692e-10	-4.3419e-11	-1.61516e-13	5.61518e-09	5.0584e-11	-0.00773242	-2.87641e-05	-0.0205534	0.00900844
2022-03-15 11:29:26	6381564	-6.08664e-11	-8.46587e-11	5.75789e-09	-1.25291e-10	1.57164e-10	-3.94414e-11	-1.69317e-13	5.7291e-09	5.61075e-11	-0.0068844	-2.95539e-05	-0.0218692	0.00979343
2022-03-15 11:29:42	6397497	-6.74453e-11	-8.62046e-11	5.90152e-08	-1.18067e-10	1.75762e-10	-4.37046e-11	-1.72409e-13	5.87201e-08	6.2747e-11	-0.000744286	-2.93612e-06	-0.00201067	0.00106858
2022-03-15 11:29:58	6413941	-5.58999e-11	-8.7597e-11	2.36678e-07	-9.9362e-11	1.46683e-10	-3.62231e-11	-1.75194e-13	2.35495e-07	5.23658e-11	-0.000153817	-7.43941e-07	-0.000421929	0.000222365
2022-03-15 11:30:14	6429604	-6.71981e-11	-9.27468e-11	2.87203e-07	-1.06048e-10	1.32701e-10	-4.35444e-11	-1.85494e-13	2.85767e-07	4.73743e-11	-0.000152377	-6.49108e-07	-0.0003711	0.000165779
2022-03-15 11:30:29	6444756	-6.87138e-11	-9.8019e-11	3.38445e-07	-1.00157e-10	1.28039e-10	-4.45265e-11	-1.96038e-13	3.36753e-07	4.57099e-11	-0.000132223	-5.82142e-07	-0.00029742	0.000135737
2022-03-15 11:30:44	6459909	-7.30353e-11	-9.54695e-11	3.45522e-07	-9.93943e-11	1.17336e-10	-4.73269e-11	-1.90939e-13	3.43794e-07	4.1889e-11	-0.00013766	-5.55387e-07	-0.00028911	0.000121843
2022-03-15 11:31:00	6475061	-8.42906e-11	-9.2757e-11	3.80012e-07	-1.14197e-10	1.14119e-10	-5.46203e-11	-1.85514e-13	3.78112e-07	4.07405e-11	-0.000144455	-4.90632e-07	-0.000302019	0.000107747
2022-03-15 11:31:15	6490214	-8.20653e-11	-9.16717e-11	3.91747e-07	-1.02339e-10	1.06616e-10	-5.31783e-11	-1.83343e-13	3.89788e-07	3.80619e-11	-0.000136429	-4.70367e-07	-0.00026255	9.76477e-05
2022-03-15 11:31:30	6505366	-8.28286e-11	-9.92476e-11	3.81087e-07	-1.06381e-10	1.26358e-10	-5.36729e-11	-1.98495e-13	3.79182e-07	4.51098e-11	-0.000141549	-5.23483e-07	-0.000280554	0.000118966
2022-03-15 11:31:45	6520519	1.98952e-09	-8.32868e-11	3.81087e-07	1.07091e-10	2.27531e-10	1.28921e-09	-1.66574e-13	3.79182e-07	8.12286e-11	0.00339998	-4.39298e-07	0.000282427	0.000214221
2022-03-15 11:32:03	6538922	8.4893e-09	-8.76379e-11	3.48567e-07	2.42218e-10	2.51142e-10	5.50107e-09	-1.75276e-13	3.46824e-07	8.96577e-11	0.0158613	-5.05374e-07	0.000698388	0.000258511
2022-03-15 11:32:16	6551864	9.81894e-09	-7.64477e-11	3.53674e-07	2.83756e-10	2.86709e-10	6.36267e-09	-1.52895e-13	3.51906e-07	1.02355e-10	0.0180806	-4.34478e-07	0.000806341	0.00029086
2022-03-15 11:32:30	6565846	1.13499e-08	-8.86003e-11	3.5672e-07	3.1664e-10	2.97513e-10	7.35474e-09	-1.77201e-13	3.54936e-07	1.06212e-10	0.0207213	-4.99246e-07	0.000892103	0.000299243
2022-03-15 11:32:43	6578259	1.19438e-08	-9.09449e-11	3.57616e-07	3.27014e-10	2.90426e-10	7.73958e-09	-1.8189e-13	3.55828e-07	1.03682e-10	0.0217509	-5.11173e-07	0.000919023	0.000291383
2022-03-15 11:32:55	6590671	1.2349e-08	-9.30949e-11	3.55287e-07	3.31529e-10	3.02389e-10	8.00215e-09	-1.8619e-13	3.53511e-07	1.07953e-10	0.0226362	-5.26688e-07	0.000937819	0.000305374
2022-03-15 11:33:08	6603084	1.25646e-08	-8.02255e-11	3.51524e-07	3.51019e-10	2.878e-10	8.14186e-09	-1.60451e-13	3.49766e-07	1.02745e-10	0.023278	-4.58738e-07	0.00100358	0.000293752
2022-03-15 11:33:20	6615495	1.25444e-08	-8.61227e-11	3.49284e-07	3.4043e-10	2.89535e-10	8.12877e-09	-1.72245e-13	3.47538e-07	1.03364e-10	0.0233896	-4.95617e-07	0.000979549	0.000297418
2022-03-15 11:33:32	6627909	1.27104e-08	-8.11572e-11	3.49463e-07	3.4187e-10	2.79016e-10	8.23634e-09	-1.62314e-13	3.47716e-07	9.96087e-11	0.023687	-4.66802e-07	0.000983188	0.000286466
2022-03-15 11:33:45	6640321	1.26513e-08	-8.14746e-11	3.50449e-07	3.28143e-10	2.69993e-10	8.19804e-09	-1.62949e-13	3.48697e-07	9.63875e-11	0.0235105	-4.67309e-07	0.000941056	0.000276422
2022-03-15 11:33:57	6652734	1.12034e-08	-9.26649e-11	3.56988e-07	3.02956e-10	2.30295e-10	7.2598e-09	-1.8533e-13	3.55203e-07	8.22153e-11	0.0204385	-5.21757e-07	0.000852909	0.00023146
2022-03-15 11:34:10	6665656	7.03925e-09	-8.3082e-11	3.33338e-07	1.35879e-10	2.22156e-10	4.56143e-09	-1.66164e-13	3.31671e-07	7.93097e-11	0.0137529	-5.0099e-07	0.00040968	0.000239121
2022-03-15 11:34:23	6678599	4.28952e-09	-8.16179e-11	3.27337e-07	4.57734e-11	2.11421e-10	2.77961e-09	-1.63236e-13	3.257e-07	7.54773e-11	0.00853425	-5.01184e-07	0.000140538	0.000231738
2022-03-15 11:34:36	6691540	2.74857e-09	-8.89074e-11	3.27695e-07	3.33249e-12	1.91519e-10	1.78107e-09	-1.77815e-13	3.26057e-07	6.83723e-11	0.00546247	-5.4535e-07	1.02206e-05	0.000209695
2022-03-15 11:34:49	6704484	1.81497e-09	-8.38601e-11	3.38713e-07	-2.99602e-11	1.80661e-10	1.1761e-09	-1.6772e-13	3.37019e-07	6.4496e-11	0.00348971	-4.97657e-07	-8.88975e-05	0.000191372
2022-03-15 11:35:02	6717425	1.25058e-09	-7.99287e-11	3.52778e-07	-4.87726e-11	1.79831e-10	8.10376e-10	-1.59857e-13	3.51014e-07	6.41997e-11	0.00230867	-4.55416e-07	-0.000138948	0.000182898
2022-03-15 11:35:16	6731409	7.96444e-10	-8.36655e-11	3.6747e-07	-7.22183e-11	1.74802e-10	5.16096e-10	-1.67331e-13	3.65633e-07	6.24043e-11	0.00141151	-4.57648e-07	-0.000197516	0.000170675
2022-03-15 11:35:31	6746562	5.11011e-10	-8.6655e-11	3.75532e-07	-7.09928e-11	1.52189e-10	3.31135e-10	-1.7331e-13	3.73654e-07	5.43315e-11	0.000886207	-4.63824e-07	-0.000189996	0.000145406
2022-03-15 11:35:46	6761716	3.33969e-10	-8.86106e-11	3.61468e-07	-7.96573e-11	1.58309e-10	2.16412e-10	-1.77221e-13	3.59661e-07	5.65163e-11	0.000601711	-4.92746e-07	-0.000221479	0.000157138
2022-03-15 11:36:01	6776869	2.23814e-10	-9.05865e-11	2.29602e-07	-8.35488e-11	1.99689e-10	1.45031e-10	-1.81173e-13	2.28454e-07	7.1289e-11	0.000634839	-7.93039e-07	-0.000365714	0.00031205
2022-03-15 11:36:17	6792021	1.59153e-10	-8.22015e-11	1.26312e-07	-1.01469e-10	2.03174e-10	1.03131e-10	-1.64403e-13	1.2568e-07	7.25331e-11	0.000820582	-1.3081e-06	-0.000807357	0.000577123
2022-03-15 11:36:32	6807174	1.19701e-10	-8.9532e-11	6.75871e-08	-1.09252e-10	2.11813e-10	7.75662e-11	-1.79064e-13	6.72492e-08	7.56172e-11	0.00115342	-2.66269e-06	-0.00162459	0.00112443
2022-03-15 11:36:47	6822837	8.60751e-11	-1.05738e-10	3.82391e-08	-1.20034e-10	2.13955e-10	5.57767e-11	-2.11476e-13	3.80479e-08	7.63819e-11	0.00146596	-5.55815e-06	-0.00315481	0.00200752
2022-03-15 11:37:03	6838241	4.66549e-11	-9.7661e-11	2.30217e-08	-1.03264e-10	1.99857e-10	3.02324e-11	-1.95322e-13	2.29066e-08	7.13489e-11	0.00131981	-8.52689e-06	-0.00450805	0.00311478
2022-03-15 11:37:18	6853644	3.12287e-11	-8.83546e-11	1.51843e-08	-1.14981e-10	1.92931e-10	2.02362e-11	-1.76709e-13	1.51084e-08	6.88764e-11	0.0013394	-1.16961e-05	-0.00761041	0.00455882
2022-03-15 11:37:34	6869047	2.01562e-11	-9.48762e-11	1.10859e-08	-1.17153e-10	2.07736e-10	1.30612e-11	-1.89752e-13	1.10305e-08	7.41618e-11	0.0011841	-1.72026e-05	-0.0106209	0.00672335
2022-03-15 11:37:49	6884451	9.40623e-12	-9.13441e-11	8.93367e-09	-1.10542e-10	1.95104e-10	6.09524e-12	-1.82688e-13	8.889e-09	6.96521e-11	0.000685705	-2.05522e-05	-0.0124358	0.00783576
2022-03-15 11:38:04	6899854	-5.06324e-12	-8.9665e-11	7.77913e-09	-1.04984e-10	2.14086e-10	-3.28098e-12	-1.7933e-13	7.74023e-09	7.64287e-11	-0.000423886	-2.31685e-05	-0.0135634	0.00987421
2022-03-15 11:38:20	6915256	-1.10832e-11	-9.73638e-11	7.04584e-09	-1.15992e-10	1.86312e-10	-7.18191e-12	-1.94728e-13	7.01061e-09	6.65134e-11	-0.00102443	-2.77761e-05	-0.0165452	0.00948753
2022-03-15 11:38:36	6931699	-9.26648e-12	-1.01131e-10	6.67363e-09	-1.16863e-10	1.64413e-10	-6.00468e-12	-2.02262e-13	6.64026e-09	5.86954e-11	-0.000904283	-3.04599e-05	-0.0175992	0.00883933
2022-03-15 11:38:52	6947631	-1.45984e-11	-9.94524e-11	6.44733e-09	-1.21474e-10	1.77451e-10	-9.45976e-12	-1.98905e-13	6.41509e-09	6.335e-11	-0.00147461	-3.10058e-05	-0.0189357	0.00987515
2022-03-15 11:39:08	6963564	-1.91242e-11	-9.58276e-11	6.3096e-09	-1.16626e-10	1.78388e-10	-1.23925e-11	-1.91655e-13	6.27805e-09	6.36845e-11	-0.00197394	-3.05278e-05	-0.0185768	0.010144
2022-03-15 11:39:24	6979497	-3.52706e-11	-9.29003e-11	6.21326e-09	-1.23323e-10	1.68621e-10	-2.28553e-11	-1.85801e-13	6.18219e-09	6.01977e-11	-0.00369696	-3.00542e-05	-0.0199481	0.00973727
2022-03-15 11:39:40	6995431	-3.85279e-11	-9.81724e-11	6.12927e-09	-1.26204e-10	1.67891e-10	-2.49661e-11	-1.96345e-13	6.09862e-09	5.99371e-11	-0.00409372	-3.21949e-05	-0.0206938	0.00982797
2022-03-15 11:39:56	7011364	-3.34002e-11	-9.14055e-11	6.06827e-09	-1.26118e-10	1.63054e-10	-2.16433e-11	-1.82811e-13	6.03793e-09	5.82103e-11	-0.00358456	-3.02771e-05	-0.0208876	0.00964077
2022-03-15 11:40:12	7027297	-4.38169e-11	-9.05558e-11	6.01032e-09	-1.22377e-10	1.77958e-10	-2.83934e-11	-1.81112e-13	5.98027e-09	6.3531e-11	-0.00474784	-3.02849e-05	-0.0204635	0.0106234
2022-03-15 11:40:28	7043231	-4.48489e-11	-9.19379e-11	5.98162e-09	-1.28548e-10	1.62401e-10	-2.90621e-11	-1.83876e-13	5.95171e-09	5.79772e-11	-0.00488298	-3.08946e-05	-0.0215985	0.00974126
2022-03-15 11:40:44	7059164	-4.81599e-11	-8.95831e-11	5.9639e-09	-1.22334e-10	1.53149e-10	-3.12076e-11	-1.79166e-13	5.93408e-09	5.46742e-11	-0.00525905	-3.01927e-05	-0.0206155	0.00921359
2022-03-15 11:41:00	7075097	-5.29221e-11	-9.86333e-11	5.9178e-09	-1.21421e-10	1.56949e-10	-3.42935e-11	-1.97267e-13	5.88821e-09	5.60308e-11	-0.0058241	-3.3502e-05	-0.020621	0.00951576
2022-03-15 11:41:16	7091031	-5.49539e-11	-9.74457e-11	5.89524e-09	-1.24173e-10	1.62432e-10	-3.56101e-11	-1.94891e-13	5.86576e-09	5.79882e-11	-0.00607084	-3.32252e-05	-0.0211691	0.00988588
2022-03-15 11:41:31	7106964	-5.25136e-11	-8.85798e-11	5.8688e-09	-1.32343e-10	1.63346e-10	-3.40288e-11	-1.7716e-13	5.83946e-09	5.83145e-11	-0.00582739	-3.03384e-05	-0.0226636	0.00998629
2022-03-15 11:41:47	7122897	-5.26211e-11	-8.79041e-11	5.86868e-09	-1.24742e-10	1.64344e-10	-3.40985e-11	-1.75808e-13	5.83934e-09	5.86708e-11	-0.00583944	-3.01076e-05	-0.0213624	0.0100475
2022-03-15 11:42:03	7138830	-5.65771e-11	-9.76914e-11	5.84325e-09	-1.29773e-10	1.65096e-10	-3.6662e-11	-1.95383e-13	5.81403e-09	5.89393e-11	-0.00630577	-3.36054e-05	-0.0223206	0.0101374
2022-03-15 11:42:19	7154764	-6.03396e-11	-9.13544e-11	5.83295e-09	-1.29343e-10	1.65027e-10	-3.91001e-11	-1.82709e-13	5.80379e-09	5.89146e-11	-0.00673699	-3.1481e-05	-0.022286	0.0101511
2022-03-15 11:42:35	7170696	-5.53409e-11	-9.1211e-11	5.82097e-09	-1.22721e-10	1.51574e-10	-3.58609e-11	-1.82422e-13	5.79187e-09	5.41119e-11	-0.0061916	-3.14962e-05	-0.0211885	0.00934274
2022-03-15 11:42:51	7186629	-6.68648e-11	-9.78752e-11	5.79569e-09	-1.23345e-10	1.42997e-10	-4.33284e-11	-1.9575e-13	5.76671e-09	5.10499e-11	-0.00751354	-3.39449e-05	-0.0213891	0.00885252
2022-03-15 11:43:07	7202562	-6.91331e-11	-9.24396e-11	5.78138e-09	-1.30891e-10	1.48718e-10	-4.47982e-11	-1.84879e-13	5.75247e-09	5.30923e-11	-0.00778765	-3.21391e-05	-0.0227539	0.00922948
2022-03-15 11:43:23	7218496	-5.89959e-11	-9.4262e-11	5.766e-09	-1.15132e-10	1.64497e-10	-3.82293e-11	-1.88524e-13	5.73717e-09	5.87254e-11	-0.00666345	-3.28601e-05	-0.0200677	0.010236
2022-03-15 11:43:39	7234429	-7.42071e-11	-1.02606e-10	5.77877e-09	-1.24549e-10	1.53486e-10	-4.80862e-11	-2.05212e-13	5.74988e-09	5.47945e-11	-0.008363	-3.56898e-05	-0.0216612	0.00952968
2022-03-15 11:43:55	7250361	-7.27343e-11	-1.02739e-10	5.74748e-09	-1.20055e-10	1.49501e-10	-4.71318e-11	-2.05478e-13	5.71874e-09	5.33719e-11	-0.00824164	-3.59306e-05	-0.0209933	0.0093328
2022-03-15 11:44:11	7266294	-8.53871e-11	-9.00131e-11	5.75696e-09	-1.18131e-10	1.39411e-10	-5.53308e-11	-1.80026e-13	5.72818e-09	4.97697e-11	-0.00965942	-3.14282e-05	-0.0206228	0.00868858
2022-03-15 11:44:27	7282227	-6.57683e-11	-9.02896e-11	5.73472e-09	-1.29978e-10	1.47712e-10	-4.26179e-11	-1.80579e-13	5.70605e-09	5.27332e-11	-0.00746889	-3.1647e-05	-0.022779	0.00924163
2022-03-15 11:44:43	7298161	-7.48521e-11	-1.00896e-10	5.71874e-09	-1.18572e-10	1.44794e-10	-4.85042e-11	-2.01792e-13	5.69015e-09	5.16915e-11	-0.00852424	-3.54634e-05	-0.0208381	0.00908438
2022-03-15 11:44:59	7314094	-6.91331e-11	-9.93495e-11	5.7189e-09	-1.29558e-10	1.44656e-10	-4.47982e-11	-1.98699e-13	5.69031e-09	5.16422e-11	-0.00787273	-3.49189e-05	-0.0227682	0.00907547
2022-03-15 11:45:15	7330027	-7.52606e-11	-8.88563e-11	5.70348e-09	-1.25721e-10	1.50061e-10	-4.87689e-11	-1.77713e-13	5.67496e-09	5.35718e-11	-0.00859369	-3.13152e-05	-0.0221536	0.00944002
2022-03-15 11:45:30	7345961	-6.31239e-11	-8.9573e-11	5.70332e-09	-1.20227e-10	1.42821e-10	-4.09043e-11	-1.79146e-13	5.6748e-09	5.09871e-11	-0.00720805	-3.15687e-05	-0.0211861	0.00898482
2022-03-15 11:45:46	7361894	-7.70881e-11	-9.63505e-11	5.69899e-09	-1.26753e-10	1.38459e-10	-4.99531e-11	-1.92701e-13	5.6705e-09	4.94299e-11	-0.0088093	-3.39831e-05	-0.0223531	0.00871703
2022-03-15 11:46:02	7377827	-7.27558e-11	-9.418e-11	5.70852e-09	-1.26559e-10	1.41523e-10	-4.71458e-11	-1.8836e-13	5.67998e-09	5.05237e-11	-0.00830034	-3.31621e-05	-0.0222816	0.00889505
2022-03-15 11:46:18	7393761	-7.31213e-11	-8.23141e-11	5.68776e-09	-1.21087e-10	1.46353e-10	-4.73826e-11	-1.64628e-13	5.65932e-09	5.2248e-11	-0.00837249	-2.90897e-05	-0.021396	0.00923221
2022-03-15 11:46:34	7409694	-6.12964e-11	-8.74536e-11	5.69793e-09	-1.26323e-10	1.64206e-10	-3.97201e-11	-1.74907e-13	5.66944e-09	5.86215e-11	-0.00700599	-3.08509e-05	-0.0222814	0.0103399
2022-03-15 11:46:50	7425625	-7.45726e-11	-9.36784e-11	5.68353e-09	-1.31827e-10	1.36363e-10	-4.8323e-11	-1.87357e-13	5.65511e-09	4.86816e-11	-0.00854502	-3.31305e-05	-0.0233111	0.00860842
2022-03-15 11:47:06	7441559	-7.94853e-11	-1.00824e-10	5.70095e-09	-1.0908e-10	1.37991e-10	-5.15065e-11	-2.01648e-13	5.67245e-09	4.92628e-11	-0.00908012	-3.55487e-05	-0.0192298	0.00868458
2022-03-15 11:47:22	7457492	-7.66581e-11	-9.61762e-11	5.68933e-09	-1.28247e-10	1.46e-10	-4.96744e-11	-1.92352e-13	5.66088e-09	5.2122e-11	-0.00877503	-3.39792e-05	-0.0226549	0.0092074
2022-03-15 11:47:38	7473426	-7.85823e-11	-8.66141e-11	5.68134e-09	-1.32536e-10	1.51191e-10	-5.09213e-11	-1.73228e-13	5.65293e-09	5.39752e-11	-0.00900795	-3.06439e-05	-0.0234455	0.00954817
2022-03-15 11:47:54	7489359	-8.62686e-11	-9.47943e-11	5.67228e-09	-1.11144e-10	1.44702e-10	-5.59021e-11	-1.89589e-13	5.64392e-09	5.16586e-11	-0.00990483	-3.35917e-05	-0.0196927	0.00915297
2022-03-15 11:48:10	7505291	-7.83673e-11	-8.8457e-11	5.66648e-09	-1.23968e-10	1.60451e-10	-5.0782e-11	-1.76914e-13	5.63815e-09	5.7281e-11	-0.00900686	-3.1378e-05	-0.0219874	0.0101595
2022-03-15 11:48:26	7521224	-7.48091e-11	-9.06991e-11	5.67025e-09	-1.30386e-10	1.42106e-10	-4.84763e-11	-1.81398e-13	5.6419e-09	5.07318e-11	-0.0085922	-3.2152e-05	-0.0231103	0.00899198
2022-03-15 11:48:42	7537155	-7.47231e-11	-9.70152e-11	5.67848e-09	-1.37245e-10	1.2764e-10	-4.84206e-11	-1.9403e-13	5.65009e-09	4.55675e-11	-0.00856988	-3.43411e-05	-0.0242908	0.00806492
2022-03-15 11:48:58	7553089	-8.95473e-11	-8.80372e-11	6.17285e-09	-1.2499e-10	1.42867e-10	-5.80267e-11	-1.76074e-13	6.14199e-09	5.10035e-11	-0.00944754	-2.86673e-05	-0.0203501	0.00830408
2022-03-15 11:49:14	7569021	-8.10333e-11	-1.0495e-10	5.33184e-09	-1.42824e-10	1.33768e-10	-5.25096e-11	-2.099e-13	5.30518e-09	4.77552e-11	-0.00989779	-3.95651e-05	-0.0269216	0.00900161
2022-03-15 11:49:29	7584954	-7.60668e-11	-1.11308e-10	5.20702e-09	-1.32988e-10	1.23102e-10	-4.92913e-11	-2.22616e-13	5.18098e-09	4.39474e-11	-0.00951388	-4.29679e-05	-0.0256685	0.00848244
2022-03-15 11:49:45	7600887	-7.30891e-11	-9.8101e-11	5.34398e-09	-1.41115e-10	1.4054e-10	-4.73617e-11	-1.96202e-13	5.31726e-09	5.01728e-11	-0.00890717	-3.68991e-05	-0.026539	0.00943583
2022-03-15 11:50:01	7616820	-8.39896e-11	-9.20915e-11	5.55194e-09	-1.2629e-10	1.36962e-10	-5.44253e-11	-1.84183e-13	5.52418e-09	4.88954e-11	-0.00985219	-3.33412e-05	-0.0228613	0.00885117
2022-03-15 11:50:17	7632754	-7.90123e-11	-1.02626e-10	5.64226e-09	-1.33332e-10	1.38199e-10	-5.12e-11	-2.05252e-13	5.61405e-09	4.9337e-11	-0.00911997	-3.65604e-05	-0.0237497	0.00878814
2022-03-15 11:50:33	7648687	-8.44948e-11	-9.1641e-11	1.31317e-08	-1.38255e-10	1.41692e-10	-5.47526e-11	-1.83282e-13	1.3066e-08	5.0584e-11	-0.00419045	-1.40274e-05	-0.0105812	0.00387141
2022-03-15 11:50:50	7665131	-6.78323e-11	-9.26239e-11	1.18697e-07	-1.09983e-10	1.16783e-10	-4.39553e-11	-1.85248e-13	1.18104e-07	4.16915e-11	-0.000372176	-1.56852e-06	-0.000931242	0.000353008
2022-03-15 11:51:05	7680794	-5.00626e-11	-1.03404e-10	2.48235e-07	-1.20604e-10	1.31226e-10	-3.24406e-11	-2.06808e-13	2.46994e-07	4.68477e-11	-0.000131342	-8.373e-07	-0.000488288	0.000189671
2022-03-15 11:51:20	7695946	-7.78083e-11	-1.04469e-10	3.12824e-07	-1.25215e-10	1.15724e-10	-5.04198e-11	-2.08938e-13	3.1126e-07	4.13135e-11	-0.000161986	-6.71265e-07	-0.000402284	0.00013273
2022-03-15 11:51:36	7711099	-7.84748e-11	-1.05615e-10	3.49643e-07	-1.20389e-10	1.02394e-10	-5.08517e-11	-2.1123e-13	3.47895e-07	3.65547e-11	-0.00014617	-6.07166e-07	-0.00034605	0.000105074
2022-03-15 11:51:51	7726251	-8.52581e-11	-1.1054e-10	3.81087e-07	-1.30827e-10	1.08897e-10	-5.52472e-11	-2.2108e-13	3.79182e-07	3.88762e-11	-0.000145701	-5.83045e-07	-0.000345025	0.000102527
2022-03-15 11:52:06	7741404	-8.58278e-11	-1.11994e-10	3.74458e-07	-1.15497e-10	9.19579e-11	-5.56164e-11	-2.23988e-13	3.72586e-07	3.2829e-11	-0.000149271	-6.01172e-07	-0.000309988	8.81112e-05
2022-03-15 11:52:21	7756556	-8.77413e-11	-1.12137e-10	3.96316e-07	-1.17217e-10	9.24421e-11	-5.68564e-11	-2.24274e-13	3.94334e-07	3.30018e-11	-0.000144183	-5.68741e-07	-0.000297253	8.369e-05
2022-03-15 11:52:36	7771709	-2.52839e-11	-1.03312e-10	4.00974e-07	-6.15544e-11	1.65719e-10	-1.6384e-11	-2.06624e-13	3.98969e-07	5.91617e-11	-4.10658e-05	-5.17895e-07	-0.000154284	0.000148286
2022-03-15 11:52:51	7786861	4.7034e-09	-9.51117e-11	3.51434e-07	1.432e-10	2.27246e-10	3.0478e-09	-1.90223e-13	3.49677e-07	8.11268e-11	0.00871606	-5.43998e-07	0.000409521	0.000232005
2022-03-15 11:53:10	7805265	8.95642e-09	-9.69238e-11	3.57974e-07	2.53667e-10	2.66661e-10	5.80376e-09	-1.93848e-13	3.56184e-07	9.5198e-11	0.0162943	-5.44234e-07	0.000712179	0.000267272
2022-03-15 11:53:24	7819247	1.077e-08	-9.73838e-11	3.59587e-07	3.03955e-10	2.62061e-10	6.97896e-09	-1.94768e-13	3.57789e-07	9.35558e-11	0.0195058	-5.44364e-07	0.000849537	0.000261483
2022-03-15 11:53:36	7831661	1.15823e-08	-8.97265e-11	3.59497e-07	3.15995e-10	2.72696e-10	7.50533e-09	-1.79453e-13	3.577e-07	9.73525e-11	0.0209822	-5.01686e-07	0.000883409	0.000272163
2022-03-15 11:53:49	7844074	1.22643e-08	-9.11906e-11	3.57078e-07	3.26552e-10	2.80536e-10	7.94727e-09	-1.82381e-13	3.55293e-07	1.00151e-10	0.0223682	-5.13327e-07	0.000919107	0.000281884
2022-03-15 11:54:01	7856486	1.23597e-08	-8.72079e-11	3.54391e-07	3.26992e-10	2.87907e-10	8.00909e-09	-1.74416e-13	3.52619e-07	1.02783e-10	0.0227131	-4.9463e-07	0.000927324	0.000291484
2022-03-15 11:54:13	7868899	1.26796e-08	-8.27339e-11	3.51883e-07	3.41999e-10	2.75222e-10	8.21638e-09	-1.65468e-13	3.50124e-07	9.82543e-11	0.0234671	-4.72598e-07	0.000976795	0.000280627
2022-03-15 11:54:26	7881311	1.25969e-08	-9.08731e-11	3.51434e-07	3.39247e-10	2.61908e-10	8.16279e-09	-1.81746e-13	3.49677e-07	9.35012e-11	0.0233438	-5.19755e-07	0.000970173	0.000267393
2022-03-15 11:54:38	7893724	1.27817e-08	-8.98084e-11	3.51793e-07	3.28519e-10	2.69571e-10	8.28254e-09	-1.79617e-13	3.50034e-07	9.62368e-11	0.0236621	-5.13141e-07	0.000938534	0.000274936
2022-03-15 11:54:51	7906136	1.05329e-08	-8.15565e-11	3.61109e-07	2.46636e-10	2.31616e-10	6.82532e-09	-1.63113e-13	3.59303e-07	8.26869e-11	0.018996	-4.5397e-07	0.000686428	0.000230131
2022-03-15 11:55:04	7919059	7.65386e-09	-9.99029e-11	4.02766e-07	1.11574e-10	2.12274e-10	4.9597e-09	-1.99806e-13	4.00752e-07	7.57818e-11	0.012376	-4.98577e-07	0.000278411	0.000189099
2022-03-15 11:55:17	7932002	3.77979e-09	-9.9381e-11	3.34682e-07	3.47439e-11	1.92824e-10	2.4493e-09	-1.98762e-13	3.33009e-07	6.88382e-11	0.00735508	-5.96867e-07	0.000104333	0.000206716
2022-03-15 11:55:29	7944946	2.34854e-09	-9.15693e-11	3.31726e-07	-2.15429e-11	1.87434e-10	1.52185e-09	-1.83139e-13	3.30067e-07	6.69139e-11	0.00461074	-5.54852e-07	-6.52682e-05	0.000202728
2022-03-15 11:55:42	7957889	1.52331e-09	-1.02565e-10	3.33787e-07	-4.22904e-11	1.72114e-10	9.87105e-10	-2.0513e-13	3.32118e-07	6.14447e-11	0.00297215	-6.17642e-07	-0.000127335	0.000185009
2022-03-15 11:55:55	7970831	1.04546e-09	-1.00282e-10	3.47851e-07	-6.39839e-11	1.78219e-10	6.77458e-10	-2.00564e-13	3.46112e-07	6.36242e-11	0.00195734	-5.79478e-07	-0.000184865	0.000183826
2022-03-15 11:56:09	7984814	6.69304e-10	-9.9821e-11	3.65051e-07	-7.56261e-11	1.53709e-10	4.33709e-10	-1.99642e-13	3.63226e-07	5.48741e-11	0.00119405	-5.49636e-07	-0.000208207	0.000151074
2022-03-15 11:56:24	7999967	4.45715e-10	-1.00773e-10	3.74995e-07	-8.21836e-11	1.47674e-10	2.88823e-10	-2.01546e-13	3.7312e-07	5.27196e-11	0.000774076	-5.40164e-07	-0.00022026	0.000141294
2022-03-15 11:56:40	8015121	2.91507e-10	-1.11626e-10	3.79563e-07	-9.35141e-11	1.55076e-10	1.88897e-10	-2.23252e-13	3.77665e-07	5.53621e-11	0.000500169	-5.91137e-07	-0.000247611	0.000146591
2022-03-15 11:56:55	8030274	1.95391e-10	-1.05708e-10	2.89263e-07	-9.77603e-11	1.87986e-10	1.26613e-10	-2.11416e-13	2.87817e-07	6.7111e-11	0.00043991	-7.34551e-07	-0.000339662	0.000233173
2022-03-15 11:57:10	8045427	1.42673e-10	-9.69543e-11	1.64206e-07	-1.02597e-10	2.02683e-10	9.24521e-11	-1.93909e-13	1.63385e-07	7.23578e-11	0.000565854	-1.18682e-06	-0.000627946	0.000442867
2022-03-15 11:57:25	8060581	1.01931e-10	-9.20198e-11	8.94933e-08	-1.03651e-10	1.95995e-10	6.60513e-11	-1.8404e-13	8.90458e-08	6.99702e-11	0.000741767	-2.0668e-06	-0.00116402	0.000785778
2022-03-15 11:57:40	8075734	7.25408e-11	-1.00517e-10	4.87091e-08	-1.08306e-10	1.97154e-10	4.70064e-11	-2.01034e-13	4.84656e-08	7.0384e-11	0.000969894	-4.14798e-06	-0.0022347	0.00145225
2022-03-15 11:57:56	8091397	4.82459e-11	-8.7812e-11	2.83911e-08	-1.08725e-10	1.93054e-10	3.12633e-11	-1.75624e-13	2.82491e-08	6.89203e-11	0.0011067	-6.21697e-06	-0.00384879	0.00243973
2022-03-15 11:58:11	8106801	2.87239e-11	-9.45076e-11	1.78612e-08	-1.23786e-10	1.84669e-10	1.86131e-11	-1.89015e-13	1.77719e-08	6.59268e-11	0.00104733	-1.06356e-05	-0.00696527	0.00370961
2022-03-15 11:58:27	8122204	1.93929e-11	-9.1129e-11	1.25046e-08	-1.15239e-10	1.93161e-10	1.25666e-11	-1.82258e-13	1.24421e-08	6.89585e-11	0.00101001	-1.46485e-05	-0.00926204	0.00554236
2022-03-15 11:58:42	8137605	7.81523e-12	-9.14874e-11	9.62625e-09	-1.24226e-10	1.78741e-10	5.06427e-12	-1.82975e-13	9.57812e-09	6.38105e-11	0.000528733	-1.91034e-05	-0.0129698	0.00666212
2022-03-15 11:58:58	8153009	-2.36499e-12	-9.71181e-11	8.09832e-09	-1.131e-10	1.89683e-10	-1.53251e-12	-1.94236e-13	8.05783e-09	6.77168e-11	-0.000190189	-2.41053e-05	-0.014036	0.00840386
2022-03-15 11:59:13	8168410	-6.62199e-12	-9.61143e-11	7.19537e-09	-1.01404e-10	1.74226e-10	-4.29105e-12	-1.92229e-13	7.15939e-09	6.21987e-11	-0.000599359	-2.68498e-05	-0.0141638	0.0086877
2022-03-15 11:59:29	8184854	-1.71354e-11	-9.50093e-11	6.7507e-09	-1.18131e-10	1.92033e-10	-1.11037e-11	-1.90019e-13	6.71695e-09	6.85558e-11	-0.00165309	-2.82894e-05	-0.017587	0.0102064
2022-03-15 11:59:45	8200787	-2.45422e-11	-9.84486e-11	6.47067e-09	-1.2528e-10	1.78849e-10	-1.59033e-11	-1.96897e-13	6.43832e-09	6.38491e-11	-0.00247011	-3.05821e-05	-0.0194585	0.00991705
2022-03-15 12:00:01	8216721	-2.59934e-11	-9.3576e-11	6.31415e-09	-1.24022e-10	1.66524e-10	-1.68437e-11	-1.87152e-13	6.28258e-09	5.94491e-11	-0.00268102	-2.9789e-05	-0.0197406	0.00946253
2022-03-15 12:00:17	8232654	-3.75604e-11	-9.1989e-11	6.21918e-09	-1.21732e-10	1.60151e-10	-2.43391e-11	-1.83978e-13	6.18808e-09	5.71739e-11	-0.00393323	-2.9731e-05	-0.019672	0.00923936
2022-03-15 12:00:33	8248587	-3.47116e-11	-9.34736e-11	6.12752e-09	-1.23173e-10	1.69888e-10	-2.24931e-11	-1.86947e-13	6.09688e-09	6.065e-11	-0.00368928	-3.06628e-05	-0.0202026	0.00994771
2022-03-15 12:00:49	8264521	-4.11831e-11	-9.9841e-11	6.09504e-09	-1.1611e-10	1.74779e-10	-2.66866e-11	-1.99682e-13	6.06456e-09	6.23961e-11	-0.00440042	-3.2926e-05	-0.0191456	0.0102886
2022-03-15 12:01:05	8280454	-4.47199e-11	-8.86822e-11	6.08621e-09	-1.17368e-10	1.56904e-10	-2.89785e-11	-1.77364e-13	6.05578e-09	5.60147e-11	-0.00478526	-2.92885e-05	-0.0193812	0.0092498
2022-03-15 12:01:21	8296387	-4.05489e-11	-9.66162e-11	6.06924e-09	-1.11531e-10	1.48372e-10	-2.62757e-11	-1.93232e-13	6.03889e-09	5.29688e-11	-0.00435108	-3.1998e-05	-0.0184688	0.00877128
2022-03-15 12:01:37	8312321	-5.65341e-11	-1.01315e-10	6.01496e-09	-1.26419e-10	1.67845e-10	-3.66341e-11	-2.0263e-13	5.98489e-09	5.99207e-11	-0.0061211	-3.3857e-05	-0.021123	0.010012
2022-03-15 12:01:53	8328254	-6.01139e-11	-9.56952e-11	5.9726e-09	-1.26613e-10	1.52772e-10	-3.89538e-11	-1.9139e-13	5.94274e-09	5.45396e-11	-0.00655486	-3.22058e-05	-0.0213055	0.00917752
2022-03-15 12:02:09	8344186	-5.63084e-11	-8.44436e-11	5.93548e-09	-1.29709e-10	1.53939e-10	-3.64878e-11	-1.68887e-13	5.9058e-09	5.49562e-11	-0.0061783	-2.85968e-05	-0.021963	0.00930546
2022-03-15 12:02:25	8360119	-5.66094e-11	-9.86743e-11	5.90398e-09	-1.30397e-10	1.48611e-10	-3.66829e-11	-1.97349e-13	5.87446e-09	5.30541e-11	-0.00624447	-3.35943e-05	-0.0221973	0.00903132
2022-03-15 12:02:41	8376051	-6.52846e-11	-9.06479e-11	5.88709e-09	-1.22603e-10	1.44848e-10	-4.23044e-11	-1.81296e-13	5.85765e-09	5.17107e-11	-0.00722208	-3.09502e-05	-0.0209304	0.00882789
2022-03-15 12:02:56	8391984	-5.63514e-11	-8.4976e-11	5.86534e-09	-1.23603e-10	1.59214e-10	-3.65157e-11	-1.69952e-13	5.83601e-09	5.68394e-11	-0.00625696	-2.91212e-05	-0.0211794	0.00973942
2022-03-15 12:03:12	8407916	-6.37044e-11	-9.40879e-11	5.84615e-09	-1.20657e-10	1.50085e-10	-4.12805e-11	-1.88176e-13	5.81692e-09	5.35803e-11	-0.00709662	-3.23497e-05	-0.0207424	0.00921112
2022-03-15 12:03:28	8423849	-7.46586e-11	-9.50912e-11	5.80406e-09	-1.21808e-10	1.34167e-10	-4.83788e-11	-1.90182e-13	5.77504e-09	4.78976e-11	-0.00837722	-3.29318e-05	-0.0210921	0.0082939
2022-03-15 12:03:44	8439781	-7.90768e-11	-9.8459e-11	5.80202e-09	-1.25409e-10	1.49908e-10	-5.12418e-11	-1.96918e-13	5.77301e-09	5.35172e-11	-0.00887609	-3.41101e-05	-0.0217233	0.00927023
2022-03-15 12:04:00	8455714	-6.96921e-11	-9.9401e-11	5.78967e-09	-1.35181e-10	1.41976e-10	-4.51605e-11	-1.98802e-13	5.76072e-09	5.06854e-11	-0.00783938	-3.45099e-05	-0.023466	0.00879845
2022-03-15 12:04:16	8471647	-6.56609e-11	-8.6952e-11	5.77997e-09	-1.29171e-10	1.44794e-10	-4.25483e-11	-1.73904e-13	5.75107e-09	5.16915e-11	-0.00739832	-3.02385e-05	-0.0224603	0.00898815
2022-03-15 12:04:32	8487581	-7.09821e-11	-8.35325e-11	5.77688e-09	-1.27516e-10	1.49778e-10	-4.59964e-11	-1.67065e-13	5.748e-09	5.34707e-11	-0.00800216	-2.90649e-05	-0.0221844	0.0093025
2022-03-15 12:04:48	8503514	-7.16271e-11	-9.36579e-11	5.74519e-09	-1.32472e-10	1.58608e-10	-4.64144e-11	-1.87316e-13	5.71646e-09	5.66231e-11	-0.00811942	-3.27678e-05	-0.0231738	0.00990526
2022-03-15 12:05:04	8519446	-7.51208e-11	-9.92886e-11	5.74663e-09	-1.27215e-10	1.27541e-10	-4.86783e-11	-1.98577e-13	5.7179e-09	4.55321e-11	-0.00851332	-3.47291e-05	-0.0222486	0.00796309
2022-03-15 12:05:20	8535379	-7.22828e-11	-9.38217e-11	5.7355e-09	-1.31945e-10	1.55521e-10	-4.68393e-11	-1.87643e-13	5.70682e-09	5.5521e-11	-0.00820759	-3.28805e-05	-0.0231206	0.00972888
2022-03-15 12:05:36	8551310	-6.92943e-11	-9.5459e-11	5.73192e-09	-1.29075e-10	1.35687e-10	-4.49027e-11	-1.90918e-13	5.70326e-09	4.84403e-11	-0.00787316	-3.34752e-05	-0.0226318	0.00849343
2022-03-15 12:05:52	8567244	-7.56583e-11	-9.33814e-11	5.71934e-09	-1.24205e-10	1.24507e-10	-4.90266e-11	-1.86763e-13	5.69074e-09	4.4449e-11	-0.00861514	-3.28187e-05	-0.0218258	0.00781075
2022-03-15 12:06:08	8583177	-7.98616e-11	-9.41903e-11	5.71227e-09	-1.31203e-10	1.39588e-10	-5.17503e-11	-1.88381e-13	5.68371e-09	4.98329e-11	-0.00910503	-3.3144e-05	-0.023084	0.00876768
2022-03-15 12:06:24	8599111	-7.87651e-11	-7.92427e-11	5.67228e-09	-1.32461e-10	1.42736e-10	-5.10398e-11	-1.58485e-13	5.64392e-09	5.09568e-11	-0.00904332	-2.80807e-05	-0.0234697	0.00902861
2022-03-15 12:06:40	8615044	-8.30543e-11	-9.83771e-11	5.70249e-09	-1.29988e-10	1.35964e-10	-5.38192e-11	-1.96754e-13	5.67398e-09	4.85391e-11	-0.00948527	-3.46766e-05	-0.0229095	0.0085547
2022-03-15 12:06:55	8630975	-8.73543e-11	-9.41595e-11	5.67433e-09	-1.30311e-10	1.40072e-10	-5.66056e-11	-1.88319e-13	5.64596e-09	5.00057e-11	-0.0100259	-3.33547e-05	-0.0230804	0.0088569
2022-03-15 12:07:11	8646909	-8.32908e-11	-1.06455e-10	5.70586e-09	-1.33633e-10	1.44917e-10	-5.39724e-11	-2.1291e-13	5.67733e-09	5.17354e-11	-0.00950666	-3.75018e-05	-0.023538	0.00911262
2022-03-15 12:07:27	8662842	-8.18288e-11	-1.09629e-10	5.68395e-09	-1.35428e-10	1.40226e-10	-5.30251e-11	-2.19258e-13	5.65553e-09	5.00607e-11	-0.00937579	-3.87688e-05	-0.0239461	0.00885163
2022-03-15 12:07:43	8678776	-9.10846e-11	-1.05022e-10	5.67148e-09	-1.35718e-10	1.37139e-10	-5.90228e-11	-2.10044e-13	5.64312e-09	4.89586e-11	-0.0104592	-3.72212e-05	-0.0240502	0.0086758
2022-03-15 12:07:59	8694709	-9.38258e-11	-1.04653e-10	5.67846e-09	-1.35471e-10	1.25721e-10	-6.07991e-11	-2.09306e-13	5.65007e-09	4.48824e-11	-0.0107608	-3.70449e-05	-0.0239769	0.00794369
2022-03-15 12:08:15	8710641	-8.39788e-11	-9.96362e-11	5.66532e-09	-1.31891e-10	1.37116e-10	-5.44183e-11	-1.99272e-13	5.63699e-09	4.89504e-11	-0.00965377	-3.53508e-05	-0.0233974	0.00868378
2022-03-15 12:08:31	8726574	-8.70641e-11	-9.5859e-11	5.66569e-09	-1.22721e-10	1.26389e-10	-5.64175e-11	-1.91718e-13	5.63736e-09	4.51209e-11	-0.0100078	-3.40085e-05	-0.0217692	0.0080039
2022-03-15 12:08:47	8742506	-8.40971e-11	-1.09046e-10	5.6634e-09	-1.35009e-10	1.30643e-10	-5.44949e-11	-2.18092e-13	5.63508e-09	4.66396e-11	-0.00967065	-3.87025e-05	-0.0239587	0.00827664
2022-03-15 12:09:03	8758439	-7.44973e-11	-9.43848e-11	5.69492e-09	-1.2141e-10	1.32378e-10	-4.82743e-11	-1.8877e-13	5.66645e-09	4.72589e-11	-0.00851932	-3.33136e-05	-0.0214261	0.00834014
2022-03-15 12:09:19	8774372	-8.76338e-11	-1.01131e-10	5.68243e-09	-1.37255e-10	1.22995e-10	-5.67867e-11	-2.02262e-13	5.65402e-09	4.39092e-11	-0.0100436	-3.57731e-05	-0.0242757	0.00776602
2022-03-15 12:09:35	8790306	-8.77843e-11	-1.00496e-10	5.66731e-09	-1.27559e-10	1.43297e-10	-5.68842e-11	-2.00992e-13	5.63897e-09	5.1157e-11	-0.0100877	-3.56434e-05	-0.022621	0.00907205
2022-03-15 12:09:51	8806239	-8.83863e-11	-8.91941e-11	5.66101e-09	-1.38825e-10	1.39542e-10	-5.72743e-11	-1.78388e-13	5.6327e-09	4.98165e-11	-0.0101682	-3.16701e-05	-0.0246462	0.00884415
2022-03-15 12:10:07	8822171	-9.15791e-11	-1.03548e-10	5.52168e-09	-1.29988e-10	1.33054e-10	-5.93433e-11	-2.07096e-13	5.49407e-09	4.75003e-11	-0.0108013	-3.76944e-05	-0.0236597	0.00864573
2022-03-15 12:10:23	8838104	-9.08588e-11	-9.98819e-11	5.26158e-09	-1.3087e-10	1.3065e-10	-5.88765e-11	-1.99764e-13	5.23527e-09	4.66421e-11	-0.0112461	-3.81573e-05	-0.0249977	0.00890919
2022-03-15 12:10:39	8854036	-7.71526e-11	-1.10038e-10	5.27867e-09	-1.36729e-10	1.26964e-10	-4.99949e-11	-2.20076e-13	5.25228e-09	4.53261e-11	-0.00951871	-4.19011e-05	-0.0260323	0.00862981
2022-03-15 12:10:54	8869969	-7.96251e-11	-9.95752e-11	5.49827e-09	-1.18679e-10	1.28239e-10	-5.15971e-11	-1.9915e-13	5.47078e-09	4.57813e-11	-0.00943139	-3.64026e-05	-0.0216933	0.00836834
2022-03-15 12:11:10	8885902	-8.33553e-11	-9.69133e-11	5.62041e-09	-1.24603e-10	1.16291e-10	-5.40142e-11	-1.93827e-13	5.59231e-09	4.15159e-11	-0.00965867	-3.46595e-05	-0.0222811	0.00742375
2022-03-15 12:11:26	8901836	-8.27533e-11	-9.78248e-11	5.76508e-09	-1.32289e-10	1.40886e-10	-5.36241e-11	-1.9565e-13	5.73625e-09	5.02963e-11	-0.00934828	-3.41076e-05	-0.0230619	0.00876814
2022-03-15 12:11:42	8917769	-6.65209e-11	-9.4692e-11	6.25194e-08	-1.32321e-10	1.39335e-10	-4.31055e-11	-1.89384e-13	6.22068e-08	4.97426e-11	-0.000692939	-3.04443e-06	-0.00212711	0.000799633
2022-03-15 12:11:59	8934212	-8.22588e-11	-1.0538e-10	2.3856e-07	-1.17185e-10	1.11031e-10	-5.33037e-11	-2.1076e-13	2.37367e-07	3.96381e-11	-0.000224562	-8.87907e-07	-0.000493687	0.00016699
2022-03-15 12:12:14	8949876	-8.65481e-11	-1.08339e-10	2.92041e-07	-1.26667e-10	1.12007e-10	-5.60832e-11	-2.16678e-13	2.90581e-07	3.99865e-11	-0.000193004	-7.45672e-07	-0.00043591	0.000137609
2022-03-15 12:12:30	8965029	-9.36968e-11	-9.7261e-11	3.42118e-07	-1.19314e-10	1.06371e-10	-6.07155e-11	-1.94522e-13	3.40407e-07	3.79744e-11	-0.000178361	-5.71439e-07	-0.000350504	0.000111556
2022-03-15 12:12:45	8980180	-1.00985e-10	-1.22713e-10	3.50091e-07	-1.2285e-10	1.05434e-10	-6.54383e-11	-2.45426e-13	3.48341e-07	3.76399e-11	-0.000187857	-7.04558e-07	-0.000352672	0.000108055
2022-03-15 12:13:00	8995334	-1.06113e-10	-1.15189e-10	3.83684e-07	-1.37675e-10	1.07484e-10	-6.87612e-11	-2.30378e-13	3.81766e-07	3.83718e-11	-0.000180114	-6.03454e-07	-0.000360627	0.000100511
2022-03-15 12:13:15	9010486	-9.28906e-11	-1.16099e-10	3.94972e-07	-1.21055e-10	9.68036e-11	-6.01931e-11	-2.32198e-13	3.92997e-07	3.45589e-11	-0.000153164	-5.90839e-07	-0.00030803	8.79367e-05
2022-03-15 12:13:30	9025639	-9.77818e-11	-1.0841e-10	3.89508e-07	-1.26785e-10	1.18964e-10	-6.33626e-11	-2.1682e-13	3.8756e-07	4.24701e-11	-0.000163491	-5.59448e-07	-0.000327136	0.000109583
2022-03-15 12:13:45	9040791	2.13594e-09	-9.03408e-11	3.80728e-07	8.65266e-11	2.07705e-10	1.38409e-09	-1.80682e-13	3.78824e-07	7.41507e-11	0.00365364	-4.76953e-07	0.000228408	0.000195739
2022-03-15 12:14:04	9059195	8.32601e-09	-9.92267e-11	3.46328e-07	2.07829e-10	2.47595e-10	5.39525e-09	-1.98453e-13	3.44596e-07	8.83914e-11	0.0156567	-5.75901e-07	0.000603109	0.000256507
2022-03-15 12:14:17	9072137	9.71554e-09	-8.53549e-11	3.54749e-07	2.72716e-10	2.45022e-10	6.29567e-09	-1.7071e-13	3.52975e-07	8.74729e-11	0.017836	-4.83631e-07	0.000772621	0.000247816
2022-03-15 12:14:31	9086121	1.12464e-08	-9.27058e-11	3.58333e-07	2.98484e-10	2.58368e-10	7.28767e-09	-1.85412e-13	3.56541e-07	9.22374e-11	0.0204399	-5.20028e-07	0.000837165	0.0002587
2022-03-15 12:14:43	9098534	1.19996e-08	-9.08425e-11	3.59049e-07	3.10137e-10	2.61224e-10	7.77574e-09	-1.81685e-13	3.57254e-07	9.3257e-11	0.0217653	-5.0856e-07	0.000868114	0.000261038
2022-03-15 12:14:55	9110946	1.23685e-08	-1.00067e-10	3.56541e-07	3.18511e-10	2.54513e-10	8.01479e-09	-2.00134e-13	3.54758e-07	9.08611e-11	0.0225922	-5.64142e-07	0.000897825	0.000256121
2022-03-15 12:15:08	9123359	1.25659e-08	-9.09449e-11	3.52868e-07	3.31185e-10	2.47664e-10	8.1427e-09	-1.8189e-13	3.51104e-07	8.8416e-11	0.0231917	-5.18052e-07	0.000943268	0.000251823
2022-03-15 12:15:20	9135771	1.25727e-08	-9.95752e-11	3.50628e-07	3.21822e-10	2.39456e-10	8.14711e-09	-1.9915e-13	3.48875e-07	8.54858e-11	0.0233525	-5.70836e-07	0.000922457	0.000245033
2022-03-15 12:15:33	9148184	1.27433e-08	-9.40571e-11	3.49643e-07	3.33152e-10	2.52463e-10	8.25766e-09	-1.88114e-13	3.47895e-07	9.01293e-11	0.0237361	-5.40722e-07	0.000957623	0.000259071
2022-03-15 12:15:45	9160596	1.26023e-08	-1.01715e-10	3.50449e-07	3.16232e-10	2.47848e-10	8.16629e-09	-2.0343e-13	3.48697e-07	8.84817e-11	0.0234195	-5.83401e-07	0.000906897	0.00025375
2022-03-15 12:15:58	9173009	1.08372e-08	-1.06005e-10	3.57795e-07	2.76575e-10	2.24244e-10	7.02251e-09	-2.1201e-13	3.56006e-07	8.00551e-11	0.0197258	-5.95524e-07	0.000776883	0.00022487
2022-03-15 12:16:10	9185931	6.68779e-09	-1.00015e-10	3.33518e-07	9.27293e-11	2.04771e-10	4.33369e-09	-2.0003e-13	3.3185e-07	7.31032e-11	0.0130592	-6.02772e-07	0.000279431	0.00022029
2022-03-15 12:16:23	9198874	4.06744e-09	-1.06639e-10	3.29218e-07	2.28867e-11	1.93331e-10	2.6357e-09	-2.13278e-13	3.27572e-07	6.90192e-11	0.00804618	-6.51088e-07	6.98677e-05	0.000210699
2022-03-15 12:16:36	9211816	2.59185e-09	-1.09701e-10	3.29487e-07	-2.60149e-11	1.83018e-10	1.67952e-09	-2.19402e-13	3.2784e-07	6.53374e-11	0.00512299	-6.69236e-07	-7.93525e-05	0.000199297
2022-03-15 12:16:49	9224759	1.72002e-09	-1.10581e-10	3.40953e-07	-4.23656e-11	1.57679e-10	1.11457e-09	-2.21162e-13	3.39248e-07	5.62914e-11	0.00328542	-6.51918e-07	-0.000124881	0.00016593
2022-03-15 12:17:02	9237700	1.17612e-09	-1.05401e-10	3.56183e-07	-6.96491e-11	1.45539e-10	7.62126e-10	-2.10802e-13	3.54402e-07	5.19574e-11	0.00215046	-5.9481e-07	-0.000196526	0.000146606
2022-03-15 12:17:16	9251684	7.33353e-10	-1.08912e-10	3.72128e-07	-8.61073e-11	1.52573e-10	4.75213e-10	-2.17824e-13	3.70267e-07	5.44686e-11	0.00128343	-5.88288e-07	-0.000232554	0.000147106
2022-03-15 12:17:31	9266837	4.55949e-10	-1.18588e-10	3.79563e-07	-1.07102e-10	1.37769e-10	2.95455e-10	-2.37176e-13	3.77665e-07	4.91835e-11	0.00078232	-6.28006e-07	-0.00028359	0.000130231
2022-03-15 12:17:46	9281991	3.10663e-10	-1.12096e-10	3.61199e-07	-9.35248e-11	1.36985e-10	2.0131e-10	-2.24192e-13	3.59393e-07	4.89036e-11	0.000560138	-6.23807e-07	-0.00026023	0.000136073
2022-03-15 12:18:02	9297144	1.90005e-10	-1.0882e-10	2.24048e-07	-1.13831e-10	1.90559e-10	1.23123e-10	-2.1764e-13	2.22928e-07	6.80296e-11	0.000552301	-9.7628e-07	-0.000510618	0.000305164
2022-03-15 12:18:17	9312297	1.33127e-10	-1.0455e-10	1.2237e-07	-1.17572e-10	1.90774e-10	8.62663e-11	-2.091e-13	1.21758e-07	6.81063e-11	0.000708505	-1.71734e-06	-0.000965619	0.000559357
2022-03-15 12:18:32	9327451	9.62123e-11	-9.894e-11	6.50688e-08	-1.15777e-10	1.87318e-10	6.23456e-11	-1.9788e-13	6.47435e-08	6.68725e-11	0.000962963	-3.05637e-06	-0.00178824	0.00103288
2022-03-15 12:18:48	9343114	6.26616e-11	-1.07858e-10	3.6799e-08	-1.25215e-10	1.8374e-10	4.06047e-11	-2.15716e-13	3.6615e-08	6.55952e-11	0.00110896	-5.89146e-06	-0.00341977	0.00179148
2022-03-15 12:19:03	9358516	4.13766e-11	-9.80705e-11	2.2202e-08	-1.33944e-10	1.74395e-10	2.6812e-11	-1.96141e-13	2.2091e-08	6.2259e-11	0.00121371	-8.87878e-06	-0.00606329	0.0028183
2022-03-15 12:19:18	9373919	2.13279e-11	-1.01429e-10	1.46681e-08	-1.27258e-10	1.71493e-10	1.38205e-11	-2.02858e-13	1.45948e-08	6.1223e-11	0.000946948	-1.38994e-05	-0.00871943	0.00419486
2022-03-15 12:19:34	9389321	1.92424e-12	-1.07889e-10	1.06822e-08	-1.45286e-10	1.54515e-10	1.24691e-12	-2.15778e-13	1.06288e-08	5.51619e-11	0.000117314	-2.03013e-05	-0.0136691	0.00518985
2022-03-15 12:19:49	9404724	-1.45232e-11	-1.17963e-10	8.6565e-09	-1.47812e-10	1.74817e-10	-9.41103e-12	-2.35926e-13	8.61322e-09	6.24097e-11	-0.00109263	-2.73912e-05	-0.0171611	0.0072458
2022-03-15 12:20:05	9420126	-2.92829e-11	-1.15311e-10	7.56638e-09	-1.49811e-10	1.56327e-10	-1.89753e-11	-2.30622e-13	7.52855e-09	5.58087e-11	-0.00252045	-3.0633e-05	-0.0198991	0.00741295
2022-03-15 12:20:20	9435529	-3.42064e-11	-1.17512e-10	6.90878e-09	-1.55498e-10	1.51321e-10	-2.21657e-11	-2.35024e-13	6.87424e-09	5.40216e-11	-0.00322447	-3.41891e-05	-0.0226204	0.00785856
2022-03-15 12:20:36	9451972	-3.41526e-11	-1.09148e-10	6.55683e-09	-1.42265e-10	1.53763e-10	-2.21309e-11	-2.18296e-13	6.52405e-09	5.48934e-11	-0.0033922	-3.34602e-05	-0.0218063	0.00841401
2022-03-15 12:20:52	9467906	-3.88181e-11	-1.14379e-10	6.34387e-09	-1.39481e-10	1.50276e-10	-2.51541e-11	-2.28758e-13	6.31215e-09	5.36485e-11	-0.00398503	-3.62409e-05	-0.0220972	0.00849925
2022-03-15 12:21:08	9483839	-5.83186e-11	-1.18229e-10	6.22943e-09	-1.38793e-10	1.44917e-10	-3.77905e-11	-2.36458e-13	6.19828e-09	5.17354e-11	-0.00609692	-3.8149e-05	-0.0223922	0.00834673
2022-03-15 12:21:24	9499771	-6.43278e-11	-1.15812e-10	6.12931e-09	-1.53542e-10	1.59353e-10	-4.16844e-11	-2.31624e-13	6.09866e-09	5.6889e-11	-0.00683501	-3.79795e-05	-0.0251763	0.00932811
2022-03-15 12:21:40	9515704	-6.12211e-11	-1.2211e-10	6.05118e-09	-1.50231e-10	1.4471e-10	-3.96713e-11	-2.4422e-13	6.02092e-09	5.16615e-11	-0.0065889	-4.05619e-05	-0.0249515	0.00858032
2022-03-15 12:21:56	9531637	-6.70153e-11	-1.1356e-10	6.01649e-09	-1.44092e-10	1.38175e-10	-4.34259e-11	-2.2712e-13	5.98641e-09	4.93285e-11	-0.00725409	-3.79393e-05	-0.0240699	0.00824008
2022-03-15 12:22:12	9547570	-6.66283e-11	-1.28211e-10	6.01283e-09	-1.47565e-10	1.38951e-10	-4.31751e-11	-2.56422e-13	5.98277e-09	4.96055e-11	-0.00721659	-4.28601e-05	-0.024665	0.0082914
2022-03-15 12:22:28	9563504	-7.34976e-11	-1.21832e-10	5.98408e-09	-1.46651e-10	1.33821e-10	-4.76264e-11	-2.43664e-13	5.95416e-09	4.77741e-11	-0.00799885	-4.09233e-05	-0.02463	0.00802365
2022-03-15 12:22:44	9579437	-7.63033e-11	-1.16816e-10	5.93636e-09	-1.44802e-10	1.36731e-10	-4.94445e-11	-2.33632e-13	5.90668e-09	4.8813e-11	-0.00837096	-3.95539e-05	-0.024515	0.00826403
2022-03-15 12:23:00	9595371	-8.70426e-11	-1.11206e-10	5.93312e-09	-1.44243e-10	1.30711e-10	-5.64036e-11	-2.22412e-13	5.90345e-09	4.66638e-11	-0.00955434	-3.76749e-05	-0.0244337	0.0079045
2022-03-15 12:23:16	9611304	-8.14203e-11	-1.21526e-10	5.9008e-09	-1.60475e-10	1.42683e-10	-5.27604e-11	-2.43052e-13	5.8713e-09	5.09378e-11	-0.00898615	-4.13967e-05	-0.0273321	0.00867574
2022-03-15 12:23:32	9627237	-9.40086e-11	-1.2171e-10	5.87388e-09	-1.46984e-10	1.38006e-10	-6.09176e-11	-2.4342e-13	5.84451e-09	4.92681e-11	-0.010423	-4.16493e-05	-0.0251491	0.00842981
2022-03-15 12:23:48	9643170	-8.81068e-11	-1.18147e-10	5.86539e-09	-1.48016e-10	1.37384e-10	-5.70932e-11	-2.36294e-13	5.83606e-09	4.90461e-11	-0.00978283	-4.04886e-05	-0.0253623	0.00840397
2022-03-15 12:24:04	9659104	-9.06868e-11	-1.15086e-10	5.84892e-09	-1.4864e-10	1.35089e-10	-5.8765e-11	-2.30172e-13	5.81968e-09	4.82268e-11	-0.0100977	-3.95507e-05	-0.0255409	0.00828685
2022-03-15 12:24:20	9675036	-8.49786e-11	-1.28283e-10	5.86165e-09	-1.45028e-10	1.34896e-10	-5.50661e-11	-2.56566e-13	5.83234e-09	4.81579e-11	-0.00944151	-4.39902e-05	-0.0248662	0.00825704
2022-03-15 12:24:35	9690969	-9.01601e-11	-1.1739e-10	5.84762e-09	-1.48908e-10	1.34014e-10	-5.84237e-11	-2.3478e-13	5.81838e-09	4.7843e-11	-0.0100412	-4.03514e-05	-0.0255927	0.00822273
2022-03-15 12:24:51	9706900	-9.60403e-11	-1.09178e-10	5.84202e-09	-1.57369e-10	1.22289e-10	-6.22341e-11	-2.18356e-13	5.81281e-09	4.36572e-11	-0.0107064	-3.75646e-05	-0.0270728	0.00751051
2022-03-15 12:25:07	9722834	-9.66531e-11	-1.14973e-10	5.85248e-09	-1.49317e-10	1.34505e-10	-6.26312e-11	-2.29946e-13	5.82322e-09	4.80183e-11	-0.0107554	-3.94878e-05	-0.0256417	0.00824601
2022-03-15 12:25:23	9738766	-8.56881e-11	-1.20205e-10	5.84036e-09	-1.56702e-10	1.29959e-10	-5.55259e-11	-2.4041e-13	5.81116e-09	4.63954e-11	-0.00955505	-4.13704e-05	-0.0269657	0.00798384
2022-03-15 12:25:39	9754699	-9.67283e-11	-1.22836e-10	5.82227e-09	-1.39438e-10	1.21974e-10	-6.26799e-11	-2.45672e-13	5.79316e-09	4.35447e-11	-0.0108196	-4.24073e-05	-0.0240694	0.00751658
2022-03-15 12:25:55	9770632	-9.48256e-11	-1.05574e-10	5.80634e-09	-1.50994e-10	1.38137e-10	-6.1447e-11	-2.11148e-13	5.77731e-09	4.93149e-11	-0.0106359	-3.65478e-05	-0.0261357	0.00853597
2022-03-15 12:26:11	9786566	-9.04826e-11	-1.23942e-10	5.77808e-09	-1.5123e-10	1.32509e-10	-5.86327e-11	-2.47884e-13	5.74919e-09	4.73057e-11	-0.0101984	-4.31163e-05	-0.0263046	0.00822824
2022-03-15 12:26:27	9802499	-9.01816e-11	-1.18629e-10	5.76501e-09	-1.47737e-10	1.14817e-10	-5.84377e-11	-2.37258e-13	5.73618e-09	4.09897e-11	-0.0101876	-4.13616e-05	-0.0257553	0.00714581
2022-03-15 12:26:43	9818432	-8.94398e-11	-1.15792e-10	5.72335e-09	-1.52166e-10	1.25398e-10	-5.7957e-11	-2.31584e-13	5.69473e-09	4.47671e-11	-0.0101773	-4.06663e-05	-0.0267205	0.00786114
2022-03-15 12:26:59	9834366	-1.01974e-10	-1.11749e-10	5.70224e-09	-1.45286e-10	1.23486e-10	-6.60792e-11	-2.23498e-13	5.67373e-09	4.40845e-11	-0.0116465	-3.93917e-05	-0.0256068	0.00776993
2022-03-15 12:27:15	9850299	-9.73948e-11	-1.19334e-10	5.69088e-09	-1.55627e-10	1.25551e-10	-6.31118e-11	-2.38668e-13	5.66243e-09	4.48217e-11	-0.0111457	-4.21494e-05	-0.0274842	0.00791564
2022-03-15 12:27:31	9866231	-9.86848e-11	-1.2001e-10	5.69179e-09	-1.61658e-10	1.11086e-10	-6.39478e-11	-2.4002e-13	5.66333e-09	3.96577e-11	-0.0112915	-4.23814e-05	-0.0285447	0.00700254
2022-03-15 12:27:47	9882164	-1.06414e-10	-1.17369e-10	5.69207e-09	-1.41168e-10	1.08429e-10	-6.89563e-11	-2.34738e-13	5.66361e-09	3.87092e-11	-0.0121753	-4.14467e-05	-0.0249254	0.00683471
2022-03-15 12:28:03	9898096	-9.99748e-11	-1.21095e-10	5.65673e-09	-1.44823e-10	1.27041e-10	-6.47837e-11	-2.4219e-13	5.62845e-09	4.53536e-11	-0.01151	-4.30296e-05	-0.0257305	0.00805793
2022-03-15 12:28:19	9914029	-1.02458e-10	-1.12659e-10	5.66574e-09	-1.55509e-10	1.17704e-10	-6.63928e-11	-2.25318e-13	5.63741e-09	4.20203e-11	-0.0117772	-3.99683e-05	-0.0275852	0.00745383
2022-03-15 12:28:34	9929961	-1.05704e-10	-1.19611e-10	5.68033e-09	-1.51327e-10	1.28063e-10	-6.84962e-11	-2.39222e-13	5.65193e-09	4.57185e-11	-0.0121191	-4.23257e-05	-0.0267744	0.00808901
2022-03-15 12:28:50	9945894	-9.9878e-11	-1.11676e-10	5.64576e-09	-1.52047e-10	1.04497e-10	-6.47209e-11	-2.23352e-13	5.61753e-09	3.73054e-11	-0.0115212	-3.97598e-05	-0.0270665	0.00664089
2022-03-15 12:29:06	9961827	-1.03189e-10	-1.18823e-10	5.65597e-09	-1.48081e-10	1.26059e-10	-6.68665e-11	-2.37646e-13	5.62769e-09	4.50031e-11	-0.0118817	-4.2228e-05	-0.0263129	0.00799672
2022-03-15 12:29:22	9977761	-1.09252e-10	-1.19375e-10	5.62568e-09	-1.42028e-10	1.1977e-10	-7.07953e-11	-2.3875e-13	5.59755e-09	4.27579e-11	-0.0126475	-4.26526e-05	-0.0253732	0.00763868
2022-03-15 12:29:38	9993694	-9.28261e-11	-1.18198e-10	5.64181e-09	-1.54971e-10	1.08851e-10	-6.01513e-11	-2.36396e-13	5.6136e-09	3.88598e-11	-0.0107153	-4.21113e-05	-0.0276063	0.00692244
2022-03-15 12:29:54	10009627	-1.03232e-10	-1.22069e-10	5.60625e-09	-1.54692e-10	1.22565e-10	-6.68943e-11	-2.44138e-13	5.57822e-09	4.37557e-11	-0.0119921	-4.37663e-05	-0.0277314	0.00784403
2022-03-15 12:30:10	10025560	-1.02877e-10	-1.12516e-10	5.6272e-09	-1.51886e-10	1.27901e-10	-6.66643e-11	-2.25032e-13	5.59906e-09	4.56607e-11	-0.0119063	-4.0191e-05	-0.027127	0.00815505
2022-03-15 12:30:26	10041494	-1.00275e-10	-1.06844e-10	5.64121e-09	-1.62034e-10	1.06164e-10	-6.49782e-11	-2.13688e-13	5.613e-09	3.79005e-11	-0.0115764	-3.80702e-05	-0.0288676	0.00675228
2022-03-15 12:30:42	10057426	-9.69756e-11	-1.13294e-10	5.62073e-09	-1.41985e-10	1.27625e-10	-6.28402e-11	-2.26588e-13	5.59263e-09	4.55621e-11	-0.0112363	-4.05155e-05	-0.0253879	0.00814682
2022-03-15 12:30:58	10073359	-9.84268e-11	-1.15905e-10	6.35623e-09	-1.5166e-10	1.01426e-10	-6.37806e-11	-2.3181e-13	6.32445e-09	3.62091e-11	-0.0100848	-3.6653e-05	-0.02398	0.00572525
2022-03-15 12:31:14	10089292	-9.67821e-11	-1.11861e-10	5.28895e-09	-1.51961e-10	1.15846e-10	-6.27148e-11	-2.23722e-13	5.26251e-09	4.1357e-11	-0.0119173	-4.25125e-05	-0.0288762	0.00785881
2022-03-15 12:31:30	10105226	-8.57203e-11	-1.13469e-10	5.17273e-09	-1.40244e-10	9.82471e-11	-5.55468e-11	-2.26938e-13	5.14687e-09	3.50742e-11	-0.0107923	-4.40925e-05	-0.0272484	0.00681467
2022-03-15 12:31:46	10121159	-9.57178e-11	-1.20584e-10	5.3304e-09	-1.53456e-10	1.08421e-10	-6.20251e-11	-2.41168e-13	5.30375e-09	3.87063e-11	-0.0116946	-4.54712e-05	-0.0289335	0.00729791
2022-03-15 12:32:02	10137091	-1.10563e-10	-1.18588e-10	5.54396e-09	-1.47403e-10	1.03576e-10	-7.16448e-11	-2.37176e-13	5.51624e-09	3.69766e-11	-0.012988	-4.2996e-05	-0.0267216	0.00670323
2022-03-15 12:32:18	10153024	-1.08983e-10	-1.26328e-10	5.64653e-09	-1.52305e-10	1.08183e-10	-7.0621e-11	-2.52656e-13	5.6183e-09	3.86213e-11	-0.0125698	-4.49702e-05	-0.0271087	0.00687421
2022-03-15 12:32:33	10168957	-1.06113e-10	-1.10397e-10	1.45611e-08	-1.50564e-10	1.15032e-10	-6.87612e-11	-2.20794e-13	1.44883e-08	4.10664e-11	-0.00474598	-1.52395e-05	-0.0103921	0.00283446
2022-03-15 12:32:50	10185401	-9.25788e-11	-1.23798e-10	1.24162e-07	-1.55047e-10	9.87386e-11	-5.99911e-11	-2.47596e-13	1.23541e-07	3.52497e-11	-0.000485596	-2.00416e-06	-0.00125502	0.000285327
2022-03-15 12:33:06	10201064	-8.54731e-11	-1.20267e-10	2.53073e-07	-1.35987e-10	8.8695e-11	-5.53866e-11	-2.40534e-13	2.51808e-07	3.16641e-11	-0.000219956	-9.55229e-07	-0.000540043	0.000125747
2022-03-15 12:33:21	10216216	-1.15917e-10	-1.31641e-10	3.14257e-07	-1.39115e-10	8.44257e-11	-7.51142e-11	-2.63282e-13	3.12686e-07	3.014e-11	-0.000240223	-8.42002e-07	-0.000444904	9.63906e-05
2022-03-15 12:33:36	10231369	-1.04339e-10	-1.00496e-10	3.53226e-07	-1.47446e-10	1.06424e-10	-6.76117e-11	-2.00992e-13	3.5146e-07	3.79934e-11	-0.000192374	-5.71878e-07	-0.000419524	0.000108102
2022-03-15 12:33:51	10246521	-1.22001e-10	-1.35685e-10	3.81982e-07	-1.43684e-10	7.60479e-11	-7.90566e-11	-2.7137e-13	3.80072e-07	2.71491e-11	-0.000208004	-7.13996e-07	-0.000378044	7.14314e-05
2022-03-15 12:34:06	10261674	-1.10026e-10	-1.32798e-10	3.75263e-07	-1.5337e-10	8.94014e-11	-7.12968e-11	-2.65596e-13	3.73387e-07	3.19163e-11	-0.000190946	-7.11316e-07	-0.000410754	8.54779e-05
2022-03-15 12:34:21	10276825	-1.13046e-10	-1.2945e-10	3.99003e-07	-1.40577e-10	7.97414e-11	-7.32538e-11	-2.589e-13	3.97008e-07	2.84677e-11	-0.000184515	-6.52128e-07	-0.000354091	7.17056e-05
2022-03-15 12:34:36	10291979	-4.60421e-11	-1.217e-10	4.01243e-07	-8.04313e-11	1.29268e-10	-2.98353e-11	-2.434e-13	3.99237e-07	4.61487e-11	-7.47308e-05	-6.09663e-07	-0.000201463	0.000115592
2022-03-15 12:34:52	10307131	4.40377e-09	-1.11728e-10	3.88074e-07	1.39158e-10	1.91933e-10	2.85364e-09	-2.23456e-13	3.86134e-07	6.85201e-11	0.0073903	-5.78701e-07	0.000360388	0.000177452
2022-03-15 12:35:10	10325535	8.56968e-09	-1.19489e-10	3.55466e-07	2.2246e-10	2.21656e-10	5.55315e-09	-2.38978e-13	3.53689e-07	7.91312e-11	0.0157007	-6.75673e-07	0.000628971	0.000223731
2022-03-15 12:35:24	10339517	1.07284e-08	-1.07653e-10	3.59138e-07	2.73845e-10	2.38035e-10	6.952e-09	-2.15306e-13	3.57342e-07	8.49785e-11	0.0194547	-6.0252e-07	0.000766338	0.000237807
2022-03-15 12:35:36	10351930	1.15703e-08	-1.09854e-10	3.61378e-07	2.89411e-10	2.48401e-10	7.49755e-09	-2.19708e-13	3.59571e-07	8.86792e-11	0.0208514	-6.11028e-07	0.000804878	0.000246625
2022-03-15 12:35:49	10364344	1.22992e-08	-1.04131e-10	3.59855e-07	3.14222e-10	2.24881e-10	7.96988e-09	-2.08262e-13	3.58056e-07	8.02825e-11	0.0222588	-5.81647e-07	0.000877578	0.000224218
2022-03-15 12:36:01	10376756	1.24249e-08	-1.23358e-10	3.57347e-07	3.19489e-10	2.32391e-10	8.05134e-09	-2.46716e-13	3.5556e-07	8.29636e-11	0.0226441	-6.9388e-07	0.000898551	0.000233332
2022-03-15 12:36:14	10389169	1.25895e-08	-1.08031e-10	3.52778e-07	3.09922e-10	2.40838e-10	8.158e-09	-2.16062e-13	3.51014e-07	8.59792e-11	0.0232412	-6.15537e-07	0.000882933	0.000244945
2022-03-15 12:36:26	10401581	1.26244e-08	-1.16786e-10	3.51524e-07	2.98419e-10	2.31946e-10	8.18061e-09	-2.33572e-13	3.49766e-07	8.28047e-11	0.0233888	-6.67794e-07	0.000853195	0.000236743
2022-03-15 12:36:38	10413994	1.27172e-08	-1.15894e-10	3.51793e-07	3.1348e-10	2.16474e-10	8.24075e-09	-2.31788e-13	3.50034e-07	7.72812e-11	0.0235427	-6.62187e-07	0.00089557	0.000220782
2022-03-15 12:36:51	10426406	1.22562e-08	-1.11564e-10	3.53853e-07	2.96226e-10	2.11744e-10	7.94202e-09	-2.23128e-13	3.52084e-07	7.55926e-11	0.0225572	-6.33736e-07	0.000841351	0.000214701
2022-03-15 12:37:03	10438819	1.04704e-08	-1.23614e-10	4.08141e-07	1.92381e-10	1.94191e-10	6.78482e-09	-2.47228e-13	4.061e-07	6.93262e-11	0.0167073	-6.08786e-07	0.000473728	0.000170712
2022-03-15 12:37:16	10451741	5.36882e-09	-1.1137e-10	3.31637e-07	6.46719e-11	1.70771e-10	3.479e-09	-2.2274e-13	3.29979e-07	6.09652e-11	0.0105431	-6.75013e-07	0.000195988	0.000184755
2022-03-15 12:37:29	10464684	3.39747e-09	-1.16734e-10	3.3092e-07	-9.86848e-12	1.57057e-10	2.20156e-09	-2.33468e-13	3.29265e-07	5.60693e-11	0.00668628	-7.09057e-07	-2.99712e-05	0.000170286
2022-03-15 12:37:42	10477626	2.17851e-09	-1.20584e-10	3.34055e-07	-4.56551e-11	1.45839e-10	1.41167e-09	-2.41168e-13	3.32385e-07	5.20645e-11	0.00424711	-7.25569e-07	-0.000137356	0.000156639
2022-03-15 12:37:55	10490569	1.44011e-09	-1.25805e-10	3.49553e-07	-8.35918e-11	1.39473e-10	9.33191e-10	-2.5161e-13	3.47805e-07	4.97919e-11	0.00268309	-7.23422e-07	-0.000240341	0.00014316
2022-03-15 12:38:08	10503511	9.60489e-10	-1.24894e-10	3.62991e-07	-9.41268e-11	1.36209e-10	6.22397e-10	-2.49788e-13	3.61176e-07	4.86266e-11	0.00172325	-6.91596e-07	-0.000260612	0.000134634
2022-03-15 12:38:22	10517494	6.19876e-10	-1.24853e-10	3.76608e-07	-1.04532e-10	1.32739e-10	4.0168e-10	-2.49706e-13	3.74725e-07	4.73878e-11	0.00107193	-6.66371e-07	-0.000278957	0.00012646
2022-03-15 12:38:37	10532647	3.92331e-10	-1.22324e-10	3.81624e-07	-1.27172e-10	1.17781e-10	2.5423e-10	-2.44648e-13	3.79716e-07	4.20478e-11	0.000669528	-6.44292e-07	-0.000334914	0.000110735
2022-03-15 12:38:52	10547800	2.40229e-10	-1.25427e-10	3.12107e-07	-1.25248e-10	1.54945e-10	1.55668e-10	-2.50854e-13	3.10546e-07	5.53154e-11	0.000501272	-8.07783e-07	-0.000403315	0.000178123
2022-03-15 12:39:07	10562954	1.66366e-10	-1.30382e-10	1.78539e-07	-1.38502e-10	1.72022e-10	1.07805e-10	-2.60764e-13	1.77646e-07	6.14119e-11	0.000606853	-1.46788e-06	-0.00077965	0.000345697
2022-03-15 12:39:23	10578106	1.08908e-10	-1.1655e-10	9.71975e-08	-1.26677e-10	1.92647e-10	7.05724e-11	-2.331e-13	9.67115e-08	6.8775e-11	0.000729721	-2.41026e-06	-0.00130984	0.000711135
2022-03-15 12:39:38	10593259	7.19711e-11	-1.1827e-10	5.19593e-08	-1.4105e-10	1.84846e-10	4.66373e-11	-2.3654e-13	5.16995e-08	6.599e-11	0.000902084	-4.57529e-06	-0.00272827	0.00127642
2022-03-15 12:39:53	10608922	3.07557e-11	-1.19816e-10	2.99879e-08	-1.45845e-10	1.79816e-10	1.99297e-11	-2.39632e-13	2.9838e-08	6.41943e-11	0.000667931	-8.03111e-06	-0.0048879	0.00215143
2022-03-15 12:40:09	10624326	1.38459e-11	-1.18987e-10	1.86758e-08	-1.42641e-10	1.80991e-10	8.97214e-12	-2.37974e-13	1.85824e-08	6.46138e-11	0.00048283	-1.28064e-05	-0.00767613	0.00347715
2022-03-15 12:40:24	10639729	2.63374e-12	-1.24863e-10	1.28092e-08	-1.34837e-10	1.70087e-10	1.70666e-12	-2.49726e-13	1.27452e-08	6.07211e-11	0.000133907	-1.95938e-05	-0.0105795	0.00476425
2022-03-15 12:40:40	10655131	-1.23732e-11	-1.26992e-10	9.76958e-09	-1.4564e-10	1.73689e-10	-8.01783e-12	-2.53984e-13	9.72073e-09	6.2007e-11	-0.000824818	-2.61281e-05	-0.0149824	0.00637884
2022-03-15 12:40:55	10670534	-2.88314e-11	-1.15751e-10	8.14643e-09	-1.57605e-10	1.54454e-10	-1.86827e-11	-2.31502e-13	8.1057e-09	5.51401e-11	-0.00230489	-2.85604e-05	-0.0194437	0.00680263
2022-03-15 12:41:10	10685935	-3.15727e-11	-1.2256e-10	7.21355e-09	-1.4578e-10	1.49225e-10	-2.04591e-11	-2.4512e-13	7.17748e-09	5.32733e-11	-0.00285046	-3.41513e-05	-0.0203107	0.00742229
2022-03-15 12:41:27	10702379	-4.12154e-11	-1.2301e-10	6.73953e-09	-1.44931e-10	1.50745e-10	-2.67076e-11	-2.4602e-13	6.70583e-09	5.3816e-11	-0.00398274	-3.66875e-05	-0.0216127	0.00802525
2022-03-15 12:41:43	10718311	-5.12129e-11	-1.25621e-10	6.4599e-09	-1.4836e-10	1.52749e-10	-3.3186e-11	-2.51242e-13	6.4276e-09	5.45314e-11	-0.00516304	-3.9088e-05	-0.0230817	0.00848394
2022-03-15 12:41:59	10734244	-5.41584e-11	-1.21679e-10	6.26631e-09	-1.48478e-10	1.45094e-10	-3.50946e-11	-2.43358e-13	6.23498e-09	5.17986e-11	-0.00562867	-3.90311e-05	-0.0238137	0.00830774
2022-03-15 12:42:15	10750176	-6.19629e-11	-1.24812e-10	6.18936e-09	-1.48554e-10	1.45939e-10	-4.0152e-11	-2.49624e-13	6.15841e-09	5.21002e-11	-0.00651985	-4.05338e-05	-0.0241221	0.00846001
2022-03-15 12:42:31	10766109	-7.05413e-11	-1.2643e-10	6.12179e-09	-1.5452e-10	1.48273e-10	-4.57108e-11	-2.5286e-13	6.09118e-09	5.29335e-11	-0.00750442	-4.15125e-05	-0.0253678	0.00869018
2022-03-15 12:42:47	10782042	-7.46693e-11	-1.2125e-10	6.09219e-09	-1.46662e-10	1.35856e-10	-4.83857e-11	-2.425e-13	6.06173e-09	4.85006e-11	-0.00798216	-4.00051e-05	-0.0241947	0.00800112
2022-03-15 12:43:02	10797976	-7.28633e-11	-1.2211e-10	6.07452e-09	-1.41695e-10	1.51805e-10	-4.72154e-11	-2.4422e-13	6.04415e-09	5.41944e-11	-0.00781176	-4.0406e-05	-0.0234433	0.00896642
2022-03-15 12:43:18	10813909	-8.18933e-11	-1.16008e-10	6.01935e-09	-1.51048e-10	1.35918e-10	-5.30669e-11	-2.32016e-13	5.98925e-09	4.85227e-11	-0.00886035	-3.87387e-05	-0.0252198	0.00810163
2022-03-15 12:43:34	10829842	-8.85906e-11	-1.16396e-10	5.98843e-09	-1.52843e-10	1.36064e-10	-5.74067e-11	-2.32792e-13	5.95849e-09	4.85748e-11	-0.00963444	-3.9069e-05	-0.0256513	0.00815221
2022-03-15 12:43:50	10845776	-8.17321e-11	-1.22713e-10	5.95375e-09	-1.49661e-10	1.40249e-10	-5.29624e-11	-2.45426e-13	5.92398e-09	5.00689e-11	-0.00894034	-4.14292e-05	-0.0252636	0.0084519
2022-03-15 12:44:06	10861709	-8.87303e-11	-1.23287e-10	5.94134e-09	-1.5653e-10	1.39911e-10	-5.74972e-11	-2.46574e-13	5.91163e-09	4.99482e-11	-0.00972612	-4.171e-05	-0.0264783	0.00844914
2022-03-15 12:44:22	10877640	-8.54193e-11	-1.20809e-10	5.90993e-09	-1.47919e-10	1.39335e-10	-5.53517e-11	-2.41618e-13	5.88038e-09	4.97426e-11	-0.00941295	-4.10888e-05	-0.0251547	0.00845908
2022-03-15 12:44:38	10893574	-9.01601e-11	-1.16008e-10	5.87626e-09	-1.60647e-10	1.29161e-10	-5.84237e-11	-2.32016e-13	5.84688e-09	4.61105e-11	-0.0099923	-3.9682e-05	-0.0274757	0.00788634
2022-03-15 12:44:54	10909505	-9.11276e-11	-1.27525e-10	5.85416e-09	-1.44974e-10	1.23732e-10	-5.90507e-11	-2.5505e-13	5.82489e-09	4.41723e-11	-0.0101376	-4.37862e-05	-0.0248887	0.00758338
2022-03-15 12:45:10	10925439	-9.64273e-11	-1.2429e-10	5.82993e-09	-1.51037e-10	1.12491e-10	-6.24849e-11	-2.4858e-13	5.80078e-09	4.01593e-11	-0.0107718	-4.28529e-05	-0.0260374	0.00692308
2022-03-15 12:45:26	10941372	-9.55351e-11	-1.20215e-10	5.80441e-09	-1.59551e-10	1.08951e-10	-6.19067e-11	-2.4043e-13	5.77539e-09	3.88955e-11	-0.0107191	-4.16301e-05	-0.027626	0.0067347
2022-03-15 12:45:42	10957306	-1.02081e-10	-1.30279e-10	5.8246e-09	-1.58293e-10	1.2205e-10	-6.61485e-11	-2.60558e-13	5.79548e-09	4.35719e-11	-0.0114138	-4.49589e-05	-0.0273132	0.00751825
2022-03-15 12:45:58	10973239	-9.6825e-11	-1.21577e-10	5.76102e-09	-1.58175e-10	1.19125e-10	-6.27426e-11	-2.43154e-13	5.73221e-09	4.25276e-11	-0.0109456	-4.24189e-05	-0.027594	0.00741906
2022-03-15 12:46:14	10989171	-9.65671e-11	-1.18782e-10	5.7623e-09	-1.58777e-10	1.35111e-10	-6.25755e-11	-2.37564e-13	5.73349e-09	4.82346e-11	-0.010914	-4.14345e-05	-0.0276929	0.00841279
2022-03-15 12:46:30	11005104	-1.06822e-10	-1.20461e-10	5.74022e-09	-1.54627e-10	1.23632e-10	-6.92207e-11	-2.40922e-13	5.71152e-09	4.41366e-11	-0.0121195	-4.21818e-05	-0.0270728	0.00772765
2022-03-15 12:46:46	11021037	-1.00662e-10	-1.20758e-10	5.72738e-09	-1.57154e-10	1.22649e-10	-6.5229e-11	-2.41516e-13	5.69874e-09	4.37857e-11	-0.0114462	-4.23806e-05	-0.027577	0.00768339
2022-03-15 12:47:01	11036971	-1.1338e-10	-1.31027e-10	5.69601e-09	-1.6671e-10	1.17766e-10	-7.34702e-11	-2.62054e-13	5.66753e-09	4.20425e-11	-0.0129634	-4.62378e-05	-0.0294149	0.00741813
2022-03-15 12:47:17	11052904	-1.10294e-10	-1.2989e-10	5.67618e-09	-1.61593e-10	1.13396e-10	-7.14705e-11	-2.5978e-13	5.6478e-09	4.04824e-11	-0.0126546	-4.59967e-05	-0.0286117	0.00716781
2022-03-15 12:47:33	11068836	-1.03285e-10	-1.23901e-10	5.65582e-09	-1.6455e-10	1.17082e-10	-6.69287e-11	-2.47802e-13	5.62754e-09	4.17983e-11	-0.0118931	-4.40338e-05	-0.0292401	0.00742745
2022-03-15 12:47:49	11084769	-1.09252e-10	-1.24781e-10	5.62709e-09	-1.64592e-10	1.16906e-10	-7.07953e-11	-2.49562e-13	5.59895e-09	4.17354e-11	-0.0126444	-4.4573e-05	-0.0293969	0.00745415
2022-03-15 12:48:05	11100701	-1.08349e-10	-1.28815e-10	5.62723e-09	-1.65764e-10	1.17589e-10	-7.02102e-11	-2.5763e-13	5.59909e-09	4.19793e-11	-0.0125396	-4.60128e-05	-0.0296055	0.00749751
2022-03-15 12:48:21	11116634	-1.09381e-10	-1.25283e-10	5.63146e-09	-1.53896e-10	1.17236e-10	-7.08789e-11	-2.50566e-13	5.6033e-09	4.18533e-11	-0.0126495	-4.47176e-05	-0.0274652	0.00746939
2022-03-15 12:48:37	11132566	-9.82118e-11	-1.24106e-10	5.60594e-09	-1.6786e-10	1.16214e-10	-6.36412e-11	-2.48212e-13	5.57791e-09	4.14884e-11	-0.0114095	-4.44991e-05	-0.0300937	0.00743798
2022-03-15 12:48:53	11148499	-1.10112e-10	-1.3074e-10	5.60378e-09	-1.62443e-10	1.06463e-10	-7.13526e-11	-2.6148e-13	5.57576e-09	3.80073e-11	-0.0127969	-4.68958e-05	-0.0291338	0.00681652
2022-03-15 12:49:09	11164430	-1.02984e-10	-1.34937e-10	5.62344e-09	-1.49005e-10	1.20069e-10	-6.67336e-11	-2.69874e-13	5.59532e-09	4.28646e-11	-0.0119267	-4.82321e-05	-0.0266303	0.0076608
2022-03-15 12:49:25	11180364	-1.08005e-10	-1.20584e-10	5.60318e-09	-1.58272e-10	1.19647e-10	-6.99872e-11	-2.41168e-13	5.57516e-09	4.2714e-11	-0.0125534	-4.32576e-05	-0.0283888	0.00766147
2022-03-15 12:49:41	11196296	-1.12649e-10	-1.19857e-10	5.62423e-09	-1.68194e-10	1.17635e-10	-7.29966e-11	-2.39714e-13	5.59611e-09	4.19957e-11	-0.0130442	-4.28358e-05	-0.0300555	0.00750445
2022-03-15 12:49:57	11212229	-1.08058e-10	-1.13346e-10	5.59793e-09	-1.62539e-10	1.11946e-10	-7.00216e-11	-2.26692e-13	5.56994e-09	3.99647e-11	-0.0125713	-4.06992e-05	-0.0291815	0.00717507
2022-03-15 12:50:13	11228162	-1.19292e-10	-1.29184e-10	5.59373e-09	-1.64808e-10	1.20776e-10	-7.73012e-11	-2.58368e-13	5.56576e-09	4.3117e-11	-0.0138887	-4.6421e-05	-0.029611	0.00774683
2022-03-15 12:50:29	11244096	-1.18475e-10	-1.1567e-10	5.60976e-09	-1.59626e-10	1.05718e-10	-7.67718e-11	-2.3134e-13	5.58171e-09	3.77413e-11	-0.0137542	-4.14461e-05	-0.028598	0.0067616
2022-03-15 12:50:45	11260029	-1.10929e-10	-1.25263e-10	5.57925e-09	-1.65603e-10	1.11416e-10	-7.1882e-11	-2.50526e-13	5.55135e-09	3.97755e-11	-0.0129486	-4.51288e-05	-0.0298311	0.00716501
2022-03-15 12:51:00	11275961	-1.1725e-10	-1.22979e-10	5.5836e-09	-1.64689e-10	1.13328e-10	-7.5978e-11	-2.45958e-13	5.55568e-09	4.04581e-11	-0.0136757	-4.42714e-05	-0.0296433	0.00728229
2022-03-15 12:51:16	11291894	-1.25258e-10	-1.17881e-10	5.58377e-09	-1.66732e-10	1.12751e-10	-8.11672e-11	-2.35762e-13	5.55585e-09	4.02521e-11	-0.0146093	-4.24349e-05	-0.0300102	0.00724499
2022-03-15 12:51:32	11307826	-1.05306e-10	-1.3118e-10	5.58248e-09	-1.67624e-10	1.19217e-10	-6.82383e-11	-2.6236e-13	5.55457e-09	4.25605e-11	-0.0122851	-4.72332e-05	-0.0301777	0.00766225
2022-03-15 12:51:48	11323759	-1.23678e-10	-1.29276e-10	5.57765e-09	-1.68624e-10	1.35511e-10	-8.01433e-11	-2.58552e-13	5.54976e-09	4.83774e-11	-0.0144409	-4.65879e-05	-0.030384	0.00871703
2022-03-15 12:52:04	11339692	-1.25882e-10	-1.36463e-10	5.74918e-09	-1.61712e-10	1.01933e-10	-8.15715e-11	-2.72926e-13	5.72043e-09	3.63901e-11	-0.0142597	-4.77107e-05	-0.0282692	0.00636142
2022-03-15 12:52:20	11355625	-1.15411e-10	-1.0491e-10	5.20457e-09	-1.68473e-10	9.483e-11	-7.47863e-11	-2.0982e-13	5.17855e-09	3.38543e-11	-0.0144416	-4.05172e-05	-0.0325329	0.00653741
2022-03-15 12:52:36	11371559	-1.10886e-10	-1.26328e-10	5.17675e-09	-1.68323e-10	9.27643e-11	-7.18541e-11	-2.52656e-13	5.15087e-09	3.31169e-11	-0.0139499	-4.90512e-05	-0.0326786	0.00642938
2022-03-15 12:52:52	11387491	-1.25774e-10	-1.33719e-10	5.41685e-09	-1.57928e-10	9.73564e-11	-8.15016e-11	-2.67438e-13	5.38977e-09	3.47562e-11	-0.0151215	-4.96196e-05	-0.0293015	0.00644856
2022-03-15 12:53:08	11403424	-1.24011e-10	-1.34999e-10	5.55187e-09	-1.627e-10	1.19371e-10	-8.03591e-11	-2.69998e-13	5.52411e-09	4.26154e-11	-0.014547	-4.88763e-05	-0.0294527	0.00771444
2022-03-15 12:53:24	11419357	-1.25699e-10	-1.39258e-10	5.64596e-09	-1.6872e-10	9.88457e-11	-8.1453e-11	-2.78516e-13	5.61773e-09	3.52879e-11	-0.0144993	-4.9578e-05	-0.0300335	0.00628153
2022-03-15 12:53:40	11435291	-1.2499e-10	-1.36002e-10	4.70496e-08	-1.63539e-10	1.19924e-10	-8.09935e-11	-2.72004e-13	4.68144e-08	4.28129e-11	-0.0017301	-5.81027e-06	-0.00349335	0.000914524
2022-03-15 12:53:56	11451734	-1.16293e-10	-1.37917e-10	1.73791e-07	-1.64152e-10	1.05434e-10	-7.53579e-11	-2.75834e-13	1.72922e-07	3.76399e-11	-0.000435791	-1.59513e-06	-0.000949283	0.00021767
2022-03-15 12:54:12	11467397	-1.25054e-10	-1.41234e-10	2.84068e-07	-1.57788e-10	8.06786e-11	-8.1035e-11	-2.82468e-13	2.82648e-07	2.88023e-11	-0.0002867	-9.99364e-07	-0.00055825	0.000101902
2022-03-15 12:54:27	11482551	-1.26344e-10	-1.38715e-10	3.34145e-07	-1.60293e-10	7.69464e-11	-8.18709e-11	-2.7743e-13	3.32474e-07	2.74699e-11	-0.000246247	-8.3444e-07	-0.000482122	8.26225e-05
2022-03-15 12:54:42	11497704	-1.36729e-10	-1.33156e-10	3.61468e-07	-1.57551e-10	7.70464e-11	-8.86004e-11	-2.66312e-13	3.59661e-07	2.75056e-11	-0.000246344	-7.40454e-07	-0.000438055	7.64764e-05
2022-03-15 12:54:57	11512856	-1.23753e-10	-1.29686e-10	3.85834e-07	-1.55229e-10	8.13386e-11	-8.01919e-11	-2.59372e-13	3.83905e-07	2.90379e-11	-0.000208885	-6.75615e-07	-0.000404342	7.56382e-05
2022-03-15 12:55:13	11528009	-1.38857e-10	-1.52465e-10	3.99272e-07	-1.56659e-10	6.55749e-11	-8.99793e-11	-3.0493e-13	3.97276e-07	2.34102e-11	-0.000226491	-7.67553e-07	-0.000394333	5.89269e-05
2022-03-15 12:55:28	11543162	-1.29859e-10	-1.46752e-10	3.88343e-07	-1.57379e-10	6.31791e-11	-8.41486e-11	-2.93504e-13	3.86401e-07	2.25549e-11	-0.000217775	-7.59583e-07	-0.000407294	5.83718e-05
2022-03-15 12:55:43	11558316	1.06423e-09	-1.40056e-10	3.92912e-07	2.85949e-12	1.675e-10	6.89621e-10	-2.80112e-13	3.90947e-07	5.97975e-11	0.00176397	-7.16495e-07	7.31426e-06	0.000152955
2022-03-15 12:56:01	11576720	7.63026e-09	-1.33566e-10	3.69888e-07	1.66291e-10	2.04296e-10	4.94441e-09	-2.67132e-13	3.68039e-07	7.29337e-11	0.0134345	-7.25826e-07	0.00045183	0.000198169
2022-03-15 12:56:14	11589662	9.27605e-09	-1.10469e-10	3.59228e-07	2.35779e-10	2.19936e-10	6.01088e-09	-2.20938e-13	3.57432e-07	7.85172e-11	0.0168169	-6.18126e-07	0.000659647	0.00021967
2022-03-15 12:56:28	11603646	1.10657e-08	-1.21894e-10	3.61468e-07	2.74511e-10	2.28483e-10	7.17057e-09	-2.43788e-13	3.59661e-07	8.15684e-11	0.0199371	-6.77828e-07	0.00076325	0.000226793
2022-03-15 12:56:41	11616059	1.17987e-08	-1.286e-10	3.61826e-07	2.87067e-10	2.08903e-10	7.64556e-09	-2.572e-13	3.60017e-07	7.45784e-11	0.0212367	-7.14411e-07	0.000797371	0.000207152
2022-03-15 12:56:53	11628471	1.24027e-08	-1.13827e-10	3.60034e-07	2.99451e-10	2.32429e-10	8.03695e-09	-2.27654e-13	3.58234e-07	8.29772e-11	0.0224349	-6.3549e-07	0.000835909	0.000231628
2022-03-15 12:57:05	11640884	1.25398e-08	-1.2689e-10	3.55555e-07	3.1033e-10	2.18378e-10	8.12579e-09	-2.5378e-13	3.53777e-07	7.79609e-11	0.0229687	-7.17344e-07	0.00087719	0.000220367
2022-03-15 12:57:18	11653295	1.25909e-08	-1.19908e-10	3.53584e-07	3.04375e-10	2.07736e-10	8.1589e-09	-2.39816e-13	3.51816e-07	7.41618e-11	0.0231908	-6.81652e-07	0.000865154	0.000210797
2022-03-15 12:57:30	11665709	1.27668e-08	-1.16437e-10	3.5242e-07	3.10954e-10	2.37974e-10	8.27289e-09	-2.32874e-13	3.50658e-07	8.49567e-11	0.0235925	-6.64106e-07	0.000886773	0.000242278
2022-03-15 12:57:43	11678120	1.26862e-08	-1.17123e-10	3.51972e-07	3.04794e-10	2.06514e-10	8.22066e-09	-2.34246e-13	3.50212e-07	7.37255e-11	0.0234734	-6.68869e-07	0.000870312	0.000210517
2022-03-15 12:57:55	11690534	1.1581e-08	-1.2042e-10	3.57257e-07	2.69566e-10	1.78656e-10	7.50449e-09	-2.4084e-13	3.55471e-07	6.37802e-11	0.0211114	-6.77524e-07	0.000758335	0.000179425
2022-03-15 12:58:07	11702946	9.09513e-09	-1.29992e-10	3.48299e-07	1.11799e-10	1.78142e-10	5.89364e-09	-2.59984e-13	3.46558e-07	6.35967e-11	0.0170063	-7.5019e-07	0.000322599	0.00018351
2022-03-15 12:58:20	11715869	4.60217e-09	-1.26091e-10	3.32801e-07	1.96509e-11	1.54431e-10	2.98221e-09	-2.52182e-13	3.31137e-07	5.51319e-11	0.00900596	-7.61564e-07	5.93437e-05	0.000166493
2022-03-15 12:58:33	11728812	2.93988e-09	-1.3551e-10	3.31278e-07	-2.68749e-11	1.44272e-10	1.90504e-09	-2.7102e-13	3.29622e-07	5.15051e-11	0.00577948	-8.22216e-07	-8.15326e-05	0.000156255
2022-03-15 12:58:46	11741755	1.89508e-09	-1.37088e-10	3.39788e-07	-6.93051e-11	1.38881e-10	1.22801e-09	-2.74176e-13	3.38089e-07	4.95805e-11	0.00363221	-8.10958e-07	-0.000204991	0.000146649
2022-03-15 12:58:59	11754699	1.26808e-09	-1.23511e-10	3.55555e-07	-8.96011e-11	1.31718e-10	8.21716e-10	-2.47022e-13	3.53777e-07	4.70233e-11	0.00232269	-6.98242e-07	-0.00025327	0.000132918
2022-03-15 12:59:13	11768681	8.00304e-10	-1.34569e-10	3.7177e-07	-1.01619e-10	1.20154e-10	5.18597e-10	-2.69138e-13	3.69911e-07	4.2895e-11	0.00140195	-7.27575e-07	-0.000274712	0.00011596
2022-03-15 12:59:28	11783834	4.95595e-10	-1.39411e-10	3.80728e-07	-1.20496e-10	1.10302e-10	3.21146e-10	-2.78822e-13	3.78824e-07	3.93778e-11	0.000847743	-7.36019e-07	-0.000318079	0.000103947
2022-03-15 12:59:43	11798986	3.12265e-10	-1.43097e-10	3.7813e-07	-1.15777e-10	1.20553e-10	2.02348e-10	-2.86194e-13	3.76239e-07	4.30374e-11	0.000537816	-7.6067e-07	-0.000307722	0.000114388
2022-03-15 12:59:59	11814139	1.89006e-10	-1.40302e-10	2.53162e-07	-1.37761e-10	1.61173e-10	1.22476e-10	-2.80604e-13	2.51896e-07	5.75388e-11	0.000486216	-1.11397e-06	-0.000546896	0.000228423
2022-03-15 13:00:14	11829291	1.32052e-10	-1.40159e-10	1.39481e-07	-1.40448e-10	1.55944e-10	8.55697e-11	-2.80318e-13	1.38784e-07	5.5672e-11	0.000616569	-2.01982e-06	-0.00101199	0.000401143
2022-03-15 13:00:29	11844444	8.61611e-11	-1.32562e-10	7.62353e-08	-1.51241e-10	1.84953e-10	5.58324e-11	-2.65124e-13	7.58541e-08	6.60282e-11	0.00073605	-3.49518e-06	-0.00199384	0.000870463
2022-03-15 13:00:44	11859596	3.80334e-11	-1.26337e-10	4.1533e-08	-1.52488e-10	1.70748e-10	2.46456e-11	-2.52674e-13	4.13253e-08	6.0957e-11	0.000596381	-6.11426e-06	-0.00368994	0.00147505
2022-03-15 13:01:00	11875259	1.69419e-11	-1.34835e-10	2.45698e-08	-1.52252e-10	1.64859e-10	1.09784e-11	-2.6967e-13	2.4447e-08	5.88547e-11	0.000449068	-1.10308e-05	-0.00622785	0.00240744
2022-03-15 13:01:15	11890661	1.61249e-12	-1.25785e-10	1.58981e-08	-1.50435e-10	1.78895e-10	1.04489e-12	-2.5157e-13	1.58186e-08	6.38655e-11	6.60547e-05	-1.59034e-05	-0.00951	0.00403737
2022-03-15 13:01:31	11906064	-1.35987e-11	-1.23102e-10	1.13681e-08	-1.53896e-10	1.51267e-10	-8.81196e-12	-2.46204e-13	1.13113e-08	5.40023e-11	-0.000779043	-2.17663e-05	-0.0136056	0.00477421
2022-03-15 13:01:46	11921466	-3.12717e-11	-1.21782e-10	9.00192e-09	-1.60088e-10	1.60551e-10	-2.02641e-11	-2.43564e-13	8.95691e-09	5.73167e-11	-0.00226239	-2.71929e-05	-0.0178731	0.00639916
2022-03-15 13:02:01	11936869	-3.73024e-11	-1.28539e-10	7.7209e-09	-1.60282e-10	1.53018e-10	-2.4172e-11	-2.57078e-13	7.6823e-09	5.46274e-11	-0.00314645	-3.34637e-05	-0.0208638	0.00711082
2022-03-15 13:02:17	11952271	-4.75364e-11	-1.29809e-10	7.00278e-09	-1.57261e-10	1.66947e-10	-3.08036e-11	-2.59618e-13	6.96777e-09	5.96001e-11	-0.00442087	-3.72599e-05	-0.0225698	0.00855369
2022-03-15 13:02:33	11968714	-5.43411e-11	-1.29839e-10	6.59322e-09	-1.5653e-10	1.38813e-10	-3.5213e-11	-2.59678e-13	6.56025e-09	4.95562e-11	-0.00536763	-3.95835e-05	-0.0238604	0.00755401
2022-03-15 13:02:49	11984647	-6.72841e-11	-1.25345e-10	6.36865e-09	-1.69752e-10	1.2291e-10	-4.36001e-11	-2.5069e-13	6.33681e-09	4.38789e-11	-0.00688045	-3.95609e-05	-0.0267883	0.00692445
2022-03-15 13:03:05	12000581	-6.06729e-11	-1.27371e-10	6.21063e-09	-1.69774e-10	1.25913e-10	-3.9316e-11	-2.54742e-13	6.17958e-09	4.49509e-11	-0.00636225	-4.12232e-05	-0.0274734	0.00727411
2022-03-15 13:03:21	12016514	-5.65126e-11	-1.2989e-10	6.12548e-09	-1.66345e-10	1.33844e-10	-3.66202e-11	-2.5978e-13	6.09485e-09	4.77823e-11	-0.00600838	-4.26229e-05	-0.0272927	0.00783978
2022-03-15 13:03:37	12032446	-7.38201e-11	-1.29962e-10	6.06943e-09	-1.54735e-10	1.46453e-10	-4.78354e-11	-2.59924e-13	6.03908e-09	5.22837e-11	-0.00792098	-4.30403e-05	-0.0256223	0.00865756
2022-03-15 13:03:53	12048379	-8.27103e-11	-1.23041e-10	6.02098e-09	-1.60389e-10	1.24484e-10	-5.35963e-11	-2.46082e-13	5.99088e-09	4.44408e-11	-0.00894632	-4.10761e-05	-0.0267722	0.00741808
2022-03-15 13:04:09	12064312	-8.46776e-11	-1.1997e-10	5.98361e-09	-1.44823e-10	1.38152e-10	-5.48711e-11	-2.3994e-13	5.95369e-09	4.93203e-11	-0.00921631	-4.0301e-05	-0.0243249	0.00828398
2022-03-15 13:04:25	12080246	-9.17511e-11	-1.26972e-10	5.93383e-09	-1.58745e-10	1.31495e-10	-5.94547e-11	-2.53944e-13	5.90416e-09	4.69437e-11	-0.01007	-4.3011e-05	-0.026887	0.00795095
2022-03-15 13:04:41	12096179	-8.28286e-11	-1.13775e-10	5.91506e-09	-1.42286e-10	1.45961e-10	-5.36729e-11	-2.2755e-13	5.88548e-09	5.21081e-11	-0.00911954	-3.86629e-05	-0.0241757	0.00885366
2022-03-15 13:04:57	12112112	-8.20868e-11	-1.30187e-10	5.89731e-09	-1.57562e-10	1.36709e-10	-5.31922e-11	-2.60374e-13	5.86782e-09	4.88051e-11	-0.00906507	-4.43732e-05	-0.0268519	0.00831741
2022-03-15 13:05:13	12128046	-9.23961e-11	-1.21556e-10	5.863e-09	-1.52295e-10	1.28769e-10	-5.98727e-11	-2.43112e-13	5.83369e-09	4.59705e-11	-0.0102633	-4.16738e-05	-0.0261061	0.00788019
2022-03-15 13:05:28	12143979	-9.62553e-11	-1.3379e-10	5.8251e-09	-1.62185e-10	1.38951e-10	-6.23734e-11	-2.6758e-13	5.79597e-09	4.96055e-11	-0.0107615	-4.61665e-05	-0.0279824	0.00855861
2022-03-15 13:05:44	12159912	-1.03361e-10	-1.3373e-10	5.83035e-09	-1.62561e-10	1.24691e-10	-6.69779e-11	-2.6746e-13	5.8012e-09	4.45147e-11	-0.0115455	-4.61043e-05	-0.028022	0.00767336
2022-03-15 13:06:00	12175846	-1.00877e-10	-1.22181e-10	5.81866e-09	-1.59744e-10	1.14871e-10	-6.53683e-11	-2.44362e-13	5.78957e-09	4.10089e-11	-0.0112907	-4.22073e-05	-0.0275917	0.00708325
2022-03-15 13:06:16	12191779	-9.42881e-11	-1.23e-10	5.78081e-09	-1.594e-10	1.06694e-10	-6.10987e-11	-2.46e-13	5.75191e-09	3.80898e-11	-0.0106223	-4.27684e-05	-0.0277126	0.00662211
2022-03-15 13:06:32	12207711	-1.00189e-10	-1.22754e-10	5.74961e-09	-1.60991e-10	1.16353e-10	-6.49225e-11	-2.45508e-13	5.72086e-09	4.1538e-11	-0.0113484	-4.29145e-05	-0.028141	0.0072608
2022-03-15 13:06:48	12223644	-9.85773e-11	-1.20717e-10	5.76593e-09	-1.63926e-10	1.29814e-10	-6.38781e-11	-2.41434e-13	5.7371e-09	4.63436e-11	-0.0111342	-4.20829e-05	-0.028573	0.00807788
2022-03-15 13:07:04	12239576	-1.01006e-10	-1.28119e-10	5.75619e-09	-1.63227e-10	1.13911e-10	-6.54519e-11	-2.56238e-13	5.72741e-09	4.06662e-11	-0.0114278	-4.47389e-05	-0.0284993	0.00710028
2022-03-15 13:07:20	12255509	-9.71476e-11	-1.17113e-10	5.72836e-09	-1.60626e-10	1.18495e-10	-6.29516e-11	-2.34226e-13	5.69972e-09	4.23027e-11	-0.0110447	-4.10943e-05	-0.0281814	0.0074219
2022-03-15 13:07:36	12271441	-1.08757e-10	-1.2771e-10	5.72617e-09	-1.63152e-10	1.04267e-10	-7.04745e-11	-2.5542e-13	5.69754e-09	3.72233e-11	-0.0123693	-4.48299e-05	-0.0286355	0.00653323
2022-03-15 13:07:52	12287374	-1.10251e-10	-1.21045e-10	5.71641e-09	-1.65528e-10	1.18771e-10	-7.14426e-11	-2.4209e-13	5.68783e-09	4.24012e-11	-0.0125606	-4.25628e-05	-0.0291021	0.00745473
2022-03-15 13:08:08	12303307	-1.055e-10	-1.22754e-10	5.71478e-09	-1.68226e-10	1.05779e-10	-6.8364e-11	-2.45508e-13	5.68621e-09	3.77631e-11	-0.0120228	-4.31761e-05	-0.0295849	0.00664118
2022-03-15 13:08:24	12319241	-1.09897e-10	-1.14461e-10	5.67901e-09	-1.44404e-10	1.19447e-10	-7.12133e-11	-2.28922e-13	5.65061e-09	4.26426e-11	-0.0126027	-4.05128e-05	-0.0255554	0.00754654
2022-03-15 13:08:40	12335174	-1.20765e-10	-1.25089e-10	5.66482e-09	-1.6427e-10	1.15447e-10	-7.82557e-11	-2.50178e-13	5.6365e-09	4.12146e-11	-0.0138838	-4.43854e-05	-0.029144	0.00731209
2022-03-15 13:08:56	12351105	-1.17561e-10	-1.21832e-10	5.67817e-09	-1.64732e-10	1.16437e-10	-7.61795e-11	-2.43664e-13	5.64978e-09	4.1568e-11	-0.0134836	-4.31281e-05	-0.0291572	0.00735746
2022-03-15 13:09:12	12367039	-1.05468e-10	-1.21372e-10	5.66248e-09	-1.62313e-10	1.071e-10	-6.83433e-11	-2.42744e-13	5.63417e-09	3.82347e-11	-0.0121301	-4.30843e-05	-0.0288087	0.00678622
2022-03-15 13:09:27	12382971	-1.27107e-10	-1.25089e-10	5.66487e-09	-1.69484e-10	1.09995e-10	-8.23653e-11	-2.50178e-13	5.63655e-09	3.92682e-11	-0.0146127	-4.4385e-05	-0.0300688	0.00696672
2022-03-15 13:09:43	12398904	-1.31311e-10	-1.31109e-10	5.64023e-09	-1.6886e-10	1.16291e-10	-8.50895e-11	-2.62218e-13	5.61203e-09	4.15159e-11	-0.015162	-4.67243e-05	-0.0300889	0.00739766
2022-03-15 13:09:59	12414836	-1.2113e-10	-1.25406e-10	5.63695e-09	-1.41695e-10	1.1256e-10	-7.84922e-11	-2.50812e-13	5.60877e-09	4.01839e-11	-0.0139946	-4.47179e-05	-0.0252631	0.00716449
2022-03-15 13:10:15	12430769	-1.2628e-10	-1.31682e-10	5.61917e-09	-1.66431e-10	1.26005e-10	-8.18294e-11	-2.63364e-13	5.59107e-09	4.49838e-11	-0.0146357	-4.71044e-05	-0.0297673	0.00804564
2022-03-15 13:10:31	12446701	-1.20528e-10	-1.36545e-10	5.63598e-09	-1.65474e-10	1.11031e-10	-7.81021e-11	-2.7309e-13	5.6078e-09	3.96381e-11	-0.0139274	-4.86982e-05	-0.0295078	0.00706838
2022-03-15 13:10:47	12462634	-1.2069e-10	-1.24812e-10	5.61033e-09	-1.65958e-10	1.02639e-10	-7.82071e-11	-2.49624e-13	5.58228e-09	3.66421e-11	-0.0140099	-4.47172e-05	-0.0297294	0.00656401
2022-03-15 13:11:03	12478567	-1.21937e-10	-1.26511e-10	5.55908e-09	-1.69871e-10	9.90836e-11	-7.90152e-11	-2.53022e-13	5.53128e-09	3.53728e-11	-0.0142851	-4.57438e-05	-0.0307109	0.00639505
2022-03-15 13:11:19	12494501	-1.24764e-10	-1.32409e-10	5.56704e-09	-1.74773e-10	1.11584e-10	-8.08471e-11	-2.64818e-13	5.5392e-09	3.98355e-11	-0.0145954	-4.78079e-05	-0.031552	0.00719155
2022-03-15 13:11:35	12510434	-1.1726e-10	-1.27412e-10	5.55227e-09	-1.57207e-10	1.0409e-10	-7.59845e-11	-2.54824e-13	5.52451e-09	3.71601e-11	-0.0137541	-4.61261e-05	-0.0284563	0.00672641
2022-03-15 13:11:51	12526367	-1.17497e-10	-1.2087e-10	5.54491e-09	-1.60271e-10	1.18679e-10	-7.61381e-11	-2.4174e-13	5.51719e-09	4.23684e-11	-0.0138002	-4.38158e-05	-0.0290494	0.00767935
2022-03-15 13:12:07	12542301	-1.18282e-10	-1.21812e-10	5.54767e-09	-1.58562e-10	1.18979e-10	-7.66467e-11	-2.43624e-13	5.51993e-09	4.24755e-11	-0.0138855	-4.41353e-05	-0.0287254	0.00769493
2022-03-15 13:12:23	12558234	-1.14197e-10	-1.1611e-10	5.50964e-09	-1.57573e-10	1.05611e-10	-7.39997e-11	-2.3222e-13	5.48209e-09	3.77031e-11	-0.0134984	-4.23597e-05	-0.0287432	0.00687751
2022-03-15 13:12:39	12574166	-1.26183e-10	-1.25672e-10	5.52948e-09	-1.46436e-10	1.13611e-10	-8.17666e-11	-2.51344e-13	5.50183e-09	4.05591e-11	-0.0148617	-4.56837e-05	-0.0266159	0.00737193
2022-03-15 13:12:55	12590099	-1.17884e-10	-1.13294e-10	6.32333e-09	-1.56251e-10	1.19977e-10	-7.63888e-11	-2.26588e-13	6.29171e-09	4.28318e-11	-0.0121412	-3.60137e-05	-0.0248344	0.00680765
2022-03-15 13:13:11	12606031	-1.14089e-10	-1.11656e-10	5.2493e-09	-1.59863e-10	9.291e-11	-7.39297e-11	-2.23312e-13	5.22305e-09	3.31689e-11	-0.0141545	-4.27551e-05	-0.0306072	0.00635047
2022-03-15 13:13:26	12621964	-9.40623e-11	-1.18188e-10	5.09213e-09	-1.56777e-10	1.02578e-10	-6.09524e-11	-2.36376e-13	5.06667e-09	3.66203e-11	-0.0120301	-4.66531e-05	-0.0309428	0.0072277
2022-03-15 13:13:42	12637896	-1.08564e-10	-1.23041e-10	5.18992e-09	-1.54208e-10	9.88071e-11	-7.03495e-11	-2.46082e-13	5.16397e-09	3.52741e-11	-0.0136231	-4.76536e-05	-0.0298623	0.00683082
2022-03-15 13:13:58	12653829	-1.06801e-10	-1.31047e-10	5.41668e-09	-1.56046e-10	9.4285e-11	-6.9207e-11	-2.62094e-13	5.3896e-09	3.36597e-11	-0.0128409	-4.86296e-05	-0.0289532	0.00624532
2022-03-15 13:14:14	12669761	-1.17035e-10	-1.22929e-10	5.53553e-09	-1.63765e-10	9.3125e-11	-7.58387e-11	-2.45858e-13	5.50785e-09	3.32456e-11	-0.0137692	-4.46377e-05	-0.029733	0.00603604
2022-03-15 13:14:30	12685694	-1.07521e-10	-1.31037e-10	9.713e-09	-1.64818e-10	1.03131e-10	-6.96736e-11	-2.62074e-13	9.66444e-09	3.68178e-11	-0.00720928	-2.71174e-05	-0.0170541	0.00380961
2022-03-15 13:14:47	12702137	-9.85773e-11	-1.23491e-10	1.11262e-07	-1.61142e-10	1.04067e-10	-6.38781e-11	-2.46982e-13	1.10706e-07	3.71519e-11	-0.000577008	-2.23098e-06	-0.00145559	0.000335592
2022-03-15 13:15:02	12717801	-1.05575e-10	-1.35337e-10	2.78962e-07	-1.53305e-10	8.30357e-11	-6.84126e-11	-2.70674e-13	2.77567e-07	2.96437e-11	-0.000246472	-9.75166e-07	-0.000552317	0.000106798
2022-03-15 13:15:17	12732954	-1.16035e-10	-1.32542e-10	3.21783e-07	-1.57336e-10	9.26186e-11	-7.51907e-11	-2.65084e-13	3.20174e-07	3.30648e-11	-0.000234843	-8.27937e-07	-0.000491408	0.000103271
2022-03-15 13:15:33	12748106	-1.13068e-10	-1.3761e-10	3.61199e-07	-1.56939e-10	5.86641e-11	-7.32681e-11	-2.7522e-13	3.59393e-07	2.09431e-11	-0.000203866	-7.65791e-07	-0.000436678	5.82735e-05
2022-03-15 13:15:48	12763259	-1.31536e-10	-1.43589e-10	3.81355e-07	-1.53133e-10	7.67086e-11	-8.52353e-11	-2.87178e-13	3.79448e-07	2.7385e-11	-0.00022463	-7.56831e-07	-0.000403568	7.21705e-05
2022-03-15 13:16:03	12778411	-1.28494e-10	-1.44869e-10	3.90672e-07	-1.43695e-10	7.40136e-11	-8.32641e-11	-2.89738e-13	3.88719e-07	2.64229e-11	-0.000214201	-7.45367e-07	-0.000369663	6.79742e-05
2022-03-15 13:16:18	12793564	-1.25764e-10	-1.49414e-10	4.08588e-07	-1.50317e-10	7.24621e-11	-8.14951e-11	-2.98828e-13	4.06545e-07	2.5869e-11	-0.000200458	-7.35043e-07	-0.000369743	6.36312e-05
2022-03-15 13:16:33	12808715	-1.19658e-10	-1.43722e-10	4.13695e-07	-1.13014e-10	9.56436e-11	-7.75384e-11	-2.87444e-13	4.11627e-07	3.41448e-11	-0.000188371	-6.98313e-07	-0.000274555	8.29508e-05
2022-03-15 13:16:48	12823869	3.83763e-09	-1.21229e-10	3.88163e-07	1.11369e-10	1.88255e-10	2.48678e-09	-2.42458e-13	3.86222e-07	6.7207e-11	0.00643874	-6.27768e-07	0.000288355	0.000174011
2022-03-15 13:17:07	12842272	8.81684e-09	-1.21526e-10	3.59049e-07	2.05442e-10	2.04441e-10	5.71331e-09	-2.43052e-13	3.57254e-07	7.29854e-11	0.0159923	-6.80334e-07	0.000575059	0.000204296
2022-03-15 13:17:21	12856254	1.08029e-08	-1.21955e-10	3.66753e-07	2.68448e-10	2.32199e-10	7.00028e-09	-2.4391e-13	3.64919e-07	8.2895e-11	0.0191831	-6.68394e-07	0.000735637	0.00022716
2022-03-15 13:17:33	12868667	1.1751e-08	-1.22672e-10	3.68008e-07	2.80574e-10	2.18693e-10	7.61465e-09	-2.45344e-13	3.66168e-07	7.80734e-11	0.0207955	-6.70031e-07	0.000766244	0.000213217
2022-03-15 13:17:46	12881081	1.25196e-08	-1.15034e-10	3.67112e-07	3.06482e-10	2.22594e-10	8.1127e-09	-2.30068e-13	3.65276e-07	7.94661e-11	0.0222098	-6.29846e-07	0.000839041	0.00021755
2022-03-15 13:17:58	12893494	1.27226e-08	-1.18843e-10	3.64603e-07	3.10921e-10	2.17794e-10	8.24424e-09	-2.37686e-13	3.6278e-07	7.77525e-11	0.0227252	-6.55179e-07	0.000857051	0.000214324
2022-03-15 13:18:10	12905906	1.29147e-08	-1.21873e-10	3.61109e-07	3.03568e-10	2.19031e-10	8.36873e-09	-2.43746e-13	3.59303e-07	7.81941e-11	0.0232915	-6.78385e-07	0.000844879	0.000217627
2022-03-15 13:18:23	12918319	1.29415e-08	-1.23348e-10	3.5887e-07	3.13093e-10	2.11936e-10	8.38609e-09	-2.46696e-13	3.57076e-07	7.56612e-11	0.0234855	-6.90879e-07	0.000876825	0.000211891
2022-03-15 13:18:35	12930731	1.29798e-08	-1.20963e-10	3.5878e-07	3.08266e-10	1.9816e-10	8.41091e-09	-2.41926e-13	3.56986e-07	7.07431e-11	0.0235609	-6.7769e-07	0.000863524	0.000198168
2022-03-15 13:18:48	12943144	1.28011e-08	-1.15485e-10	3.59228e-07	2.93173e-10	2.09202e-10	8.29511e-09	-2.3097e-13	3.57432e-07	7.46851e-11	0.0232075	-6.46193e-07	0.000820221	0.000208949
2022-03-15 13:19:00	12955555	1.01767e-08	-1.28641e-10	4.07783e-07	2.35585e-10	1.77421e-10	6.5945e-09	-2.57282e-13	4.05744e-07	6.33393e-11	0.0162529	-6.34099e-07	0.000580625	0.000156107
2022-03-15 13:19:13	12968479	5.84229e-09	-1.32193e-10	3.42118e-07	5.69641e-11	1.63522e-10	3.7858e-09	-2.64386e-13	3.40407e-07	5.83774e-11	0.0111214	-7.76675e-07	0.000167341	0.000171493
2022-03-15 13:19:26	12981422	3.5927e-09	-1.24362e-10	3.38983e-07	-9.78248e-12	1.48242e-10	2.32807e-09	-2.48724e-13	3.37288e-07	5.29224e-11	0.00690232	-7.37423e-07	-2.90033e-05	0.000156906
2022-03-15 13:19:39	12994365	2.25631e-09	-1.36135e-10	3.3952e-07	-5.64159e-11	1.46476e-10	1.46209e-09	-2.7227e-13	3.37822e-07	5.22919e-11	0.00432798	-8.05956e-07	-0.000166999	0.000154791
2022-03-15 13:19:52	13007309	1.47592e-09	-1.39698e-10	3.53316e-07	-8.12698e-11	1.1967e-10	9.56396e-10	-2.79396e-13	3.51549e-07	4.27222e-11	0.00272052	-7.94756e-07	-0.000231176	0.000121525
2022-03-15 13:20:05	13020250	9.92298e-10	-1.38245e-10	3.67828e-07	-9.71691e-11	1.19432e-10	6.43009e-10	-2.7649e-13	3.65989e-07	4.26372e-11	0.00175691	-7.5546e-07	-0.000265497	0.000116499
2022-03-15 13:20:19	13034234	6.23122e-10	-1.32572e-10	3.82072e-07	-1.15562e-10	9.79471e-11	4.03783e-10	-2.65144e-13	3.80162e-07	3.49671e-11	0.00106214	-6.97451e-07	-0.000303981	9.19796e-05
2022-03-15 13:20:34	13049387	3.86343e-10	-1.36648e-10	3.89597e-07	-1.31203e-10	9.87457e-11	2.5035e-10	-2.73296e-13	3.87649e-07	3.52522e-11	0.000645817	-7.05009e-07	-0.000338458	9.09385e-05
2022-03-15 13:20:49	13064541	2.4611e-10	-1.40814e-10	3.33608e-07	-1.32504e-10	1.25928e-10	1.59479e-10	-2.81628e-13	3.3194e-07	4.49563e-11	0.000480446	-8.48431e-07	-0.000399181	0.000135435
2022-03-15 13:21:04	13079694	1.53348e-10	-1.26552e-10	1.92514e-07	-1.40577e-10	1.53041e-10	9.93695e-11	-2.53104e-13	1.91551e-07	5.46356e-11	0.000518761	-1.32134e-06	-0.000733886	0.000285227
2022-03-15 13:21:19	13094846	9.64381e-11	-1.29327e-10	1.03737e-07	-1.55305e-10	1.41692e-10	6.24919e-11	-2.58654e-13	1.03218e-07	5.0584e-11	0.000605434	-2.50589e-06	-0.00150463	0.000490068
2022-03-15 13:21:34	13109999	5.56634e-11	-1.35255e-10	5.49452e-08	-1.52864e-10	1.60289e-10	3.60699e-11	-2.7051e-13	5.46705e-08	5.72232e-11	0.000659769	-4.94801e-06	-0.0027961	0.00104669
2022-03-15 13:21:50	13125662	2.79284e-11	-1.32204e-10	3.12303e-08	-1.49242e-10	1.49731e-10	1.80976e-11	-2.64408e-13	3.10741e-08	5.3454e-11	0.000582401	-8.50894e-06	-0.00480277	0.00172021
2022-03-15 13:22:06	13141066	6.78323e-12	-1.24863e-10	1.92156e-08	-1.55541e-10	1.62662e-10	4.39553e-12	-2.49726e-13	1.91195e-08	5.80703e-11	0.000229898	-1.30613e-05	-0.00813519	0.00303723
2022-03-15 13:22:21	13156469	-7.87973e-12	-1.28098e-10	1.29761e-08	-1.55821e-10	1.68721e-10	-5.10607e-12	-2.56196e-13	1.29112e-08	6.02334e-11	-0.000395475	-1.98429e-05	-0.0120687	0.0046652
2022-03-15 13:22:36	13171872	-1.78127e-11	-1.3207e-10	9.79867e-09	-1.63389e-10	1.52634e-10	-1.15426e-11	-2.6414e-13	9.74968e-09	5.44903e-11	-0.0011839	-2.70922e-05	-0.0167584	0.00558894
2022-03-15 13:22:52	13187276	-3.36796e-11	-1.19662e-10	8.12295e-09	-1.46694e-10	1.53747e-10	-2.18244e-11	-2.39324e-13	8.08234e-09	5.48877e-11	-0.00270026	-2.96107e-05	-0.01815	0.00679107
2022-03-15 13:23:07	13202679	-4.67086e-11	-1.25313e-10	7.15203e-09	-1.56734e-10	1.5e-10	-3.02672e-11	-2.50626e-13	7.11627e-09	5.355e-11	-0.00425324	-3.52187e-05	-0.0220247	0.00752501
2022-03-15 13:23:24	13219122	-5.13741e-11	-1.34047e-10	6.66354e-09	-1.50618e-10	1.53794e-10	-3.32904e-11	-2.68094e-13	6.63022e-09	5.49045e-11	-0.00502101	-4.04351e-05	-0.0227169	0.00828094
2022-03-15 13:23:40	13235056	-5.64804e-11	-1.37303e-10	6.35511e-09	-1.60669e-10	1.84891e-10	-3.65993e-11	-2.74606e-13	6.32333e-09	6.60061e-11	-0.00578797	-4.34274e-05	-0.0254089	0.0104385
2022-03-15 13:23:55	13250989	-6.49299e-11	-1.2044e-10	6.20628e-09	-1.5997e-10	1.42591e-10	-4.20746e-11	-2.4088e-13	6.17525e-09	5.0905e-11	-0.00681342	-3.90073e-05	-0.025905	0.00824339
2022-03-15 13:24:11	13266920	-7.69053e-11	-1.31825e-10	6.07135e-09	-1.61249e-10	1.3257e-10	-4.98346e-11	-2.6365e-13	6.04099e-09	4.73275e-11	-0.00824941	-4.36435e-05	-0.0266925	0.00783439
2022-03-15 13:24:27	13282854	-6.88858e-11	-1.31262e-10	6.01016e-09	-1.55251e-10	1.61088e-10	-4.4638e-11	-2.62524e-13	5.98011e-09	5.75084e-11	-0.00746441	-4.38995e-05	-0.0259612	0.00961662
2022-03-15 13:24:43	13298785	-8.79348e-11	-1.37139e-10	5.94531e-09	-1.54864e-10	1.34536e-10	-5.69818e-11	-2.74278e-13	5.91558e-09	4.80294e-11	-0.00963248	-4.63653e-05	-0.026179	0.00811912
2022-03-15 13:24:59	13314719	-8.59783e-11	-1.34887e-10	5.8915e-09	-1.55563e-10	1.20622e-10	-5.57139e-11	-2.69774e-13	5.86204e-09	4.30621e-11	-0.00950419	-4.60205e-05	-0.0265373	0.00734591
2022-03-15 13:25:15	13330651	-9.23208e-11	-1.24351e-10	5.84466e-09	-1.64281e-10	1.37062e-10	-5.98239e-11	-2.48702e-13	5.81544e-09	4.89311e-11	-0.0102871	-4.27658e-05	-0.0282491	0.00841401
2022-03-15 13:25:31	13346584	-7.41641e-11	-1.26071e-10	5.8247e-09	-1.59992e-10	1.16406e-10	-4.80583e-11	-2.52142e-13	5.79558e-09	4.15569e-11	-0.00829224	-4.35059e-05	-0.0276059	0.00717046
2022-03-15 13:25:47	13362517	-8.92141e-11	-1.29102e-10	5.79989e-09	-1.64464e-10	1.21413e-10	-5.78107e-11	-2.58204e-13	5.77089e-09	4.33444e-11	-0.0100176	-4.47425e-05	-0.0284989	0.00751088
2022-03-15 13:26:03	13378451	-1.04403e-10	-1.34835e-10	5.76352e-09	-1.71494e-10	1.18511e-10	-6.76531e-11	-2.6967e-13	5.7347e-09	4.23084e-11	-0.0117971	-4.70242e-05	-0.0299046	0.00737762
2022-03-15 13:26:19	13394384	-9.74271e-11	-1.42166e-10	5.73443e-09	-1.66624e-10	1.29199e-10	-6.31328e-11	-2.84332e-13	5.70576e-09	4.6124e-11	-0.0110647	-4.98325e-05	-0.0292028	0.00808377
2022-03-15 13:26:35	13410316	-1.0149e-10	-1.31999e-10	5.72858e-09	-1.65216e-10	1.15186e-10	-6.57655e-11	-2.63998e-13	5.69994e-09	4.11214e-11	-0.0115379	-4.63159e-05	-0.0289856	0.00721436
2022-03-15 13:26:51	13426249	-9.71583e-11	-1.32849e-10	5.7397e-09	-1.68247e-10	1.05396e-10	-6.29586e-11	-2.65698e-13	5.711e-09	3.76264e-11	-0.0110241	-4.65239e-05	-0.0294602	0.0065884
2022-03-15 13:27:07	13442181	-1.03328e-10	-1.4409e-10	5.74243e-09	-1.74891e-10	1.2205e-10	-6.69565e-11	-2.8818e-13	5.71372e-09	4.35719e-11	-0.0117186	-5.04365e-05	-0.030609	0.00762583
2022-03-15 13:27:23	13458114	-1.11197e-10	-1.39995e-10	5.72487e-09	-1.66775e-10	1.12352e-10	-7.20557e-11	-2.7999e-13	5.69625e-09	4.01097e-11	-0.0126497	-4.91534e-05	-0.0292781	0.00704142
2022-03-15 13:27:39	13474046	-1.05822e-10	-1.33586e-10	5.72084e-09	-1.7316e-10	1.22334e-10	-6.85727e-11	-2.67172e-13	5.69224e-09	4.36732e-11	-0.0120467	-4.69362e-05	-0.0304204	0.00767242
2022-03-15 13:27:54	13489979	-1.09391e-10	-1.32808e-10	5.70852e-09	-1.77095e-10	1.09995e-10	-7.08854e-11	-2.65616e-13	5.67998e-09	3.92682e-11	-0.0124799	-4.67636e-05	-0.0311788	0.00691345
2022-03-15 13:28:10	13505911	-1.13444e-10	-1.27996e-10	5.70031e-09	-1.73665e-10	1.13834e-10	-7.35117e-11	-2.55992e-13	5.67181e-09	4.06387e-11	-0.0129609	-4.51341e-05	-0.030619	0.00716504
2022-03-15 13:28:26	13521844	-1.10757e-10	-1.42677e-10	5.6899e-09	-1.7273e-10	1.13205e-10	-7.17705e-11	-2.85354e-13	5.66145e-09	4.04142e-11	-0.0126771	-5.0403e-05	-0.0305098	0.00713849
2022-03-15 13:28:42	13537777	-1.2327e-10	-1.42452e-10	5.69468e-09	-1.68118e-10	1.09404e-10	-7.9879e-11	-2.84904e-13	5.66621e-09	3.90572e-11	-0.0140974	-5.02813e-05	-0.0296703	0.00689301
2022-03-15 13:28:58	13553711	-1.23678e-10	-1.42668e-10	5.65064e-09	-1.75289e-10	1.09112e-10	-8.01433e-11	-2.85336e-13	5.62239e-09	3.8953e-11	-0.0142543	-5.075e-05	-0.031177	0.00692819
2022-03-15 13:29:14	13569644	-1.16476e-10	-1.38849e-10	5.61573e-09	-1.70301e-10	9.90764e-11	-7.54764e-11	-2.77698e-13	5.58765e-09	3.53703e-11	-0.0135077	-4.96985e-05	-0.0304781	0.00633008
2022-03-15 13:29:30	13585576	-1.07682e-10	-1.38213e-10	5.64252e-09	-1.62045e-10	1.16291e-10	-6.97779e-11	-2.76426e-13	5.61431e-09	4.15159e-11	-0.0124286	-4.9236e-05	-0.0288629	0.00739466
2022-03-15 13:29:46	13601509	-1.2886e-10	-1.37876e-10	5.59383e-09	-1.79137e-10	1.10349e-10	-8.35013e-11	-2.75752e-13	5.56586e-09	3.93946e-11	-0.0150024	-4.95435e-05	-0.032185	0.0070779
2022-03-15 13:30:02	13617442	-1.28559e-10	-1.45073e-10	5.62225e-09	-1.65893e-10	1.0925e-10	-8.33062e-11	-2.90146e-13	5.59414e-09	3.90023e-11	-0.0148917	-5.18661e-05	-0.0296548	0.00697198
2022-03-15 13:30:18	13633376	-1.22818e-10	-1.39883e-10	5.62292e-09	-1.74525e-10	1.23179e-10	-7.95861e-11	-2.79766e-13	5.59481e-09	4.39749e-11	-0.014225	-5.00046e-05	-0.0311941	0.00785995
2022-03-15 13:30:34	13649309	-1.06586e-10	-1.27229e-10	5.61599e-09	-1.74138e-10	9.96293e-11	-6.90677e-11	-2.54458e-13	5.58791e-09	3.55677e-11	-0.0123602	-4.55372e-05	-0.0311634	0.00636511
2022-03-15 13:30:50	13665240	-1.2184e-10	-1.33412e-10	5.58142e-09	-1.64646e-10	9.45e-11	-7.89523e-11	-2.66824e-13	5.55351e-09	3.37365e-11	-0.0142166	-4.8046e-05	-0.0296472	0.0060748
2022-03-15 13:31:06	13681174	-1.22603e-10	-1.25283e-10	5.58717e-09	-1.7015e-10	1.10187e-10	-7.94467e-11	-2.50566e-13	5.55923e-09	3.93368e-11	-0.014291	-4.5072e-05	-0.0306067	0.00707593
2022-03-15 13:31:22	13697105	-1.18776e-10	-1.31456e-10	5.56504e-09	-1.72139e-10	9.54829e-11	-7.69668e-11	-2.62912e-13	5.53721e-09	3.40874e-11	-0.0138999	-4.74809e-05	-0.0310877	0.00615605
2022-03-15 13:31:38	13713039	-1.31762e-10	-1.30587e-10	5.54954e-09	-1.68828e-10	9.29179e-11	-8.53818e-11	-2.61174e-13	5.52179e-09	3.31717e-11	-0.0154627	-4.72988e-05	-0.0305749	0.00600741
2022-03-15 13:31:53	13728972	-1.23721e-10	-1.32788e-10	5.55013e-09	-1.57616e-10	1.05779e-10	-8.01712e-11	-2.65576e-13	5.52238e-09	3.77631e-11	-0.0145175	-4.80909e-05	-0.0285413	0.00683819
2022-03-15 13:32:09	13744906	-1.11101e-10	-1.26614e-10	5.54048e-09	-1.66914e-10	9.923e-11	-7.19934e-11	-2.53228e-13	5.51278e-09	3.54251e-11	-0.0130594	-4.59347e-05	-0.0302777	0.006426
2022-03-15 13:32:25	13760839	-1.16551e-10	-1.3205e-10	5.51096e-09	-1.66173e-10	1.05902e-10	-7.5525e-11	-2.641e-13	5.48341e-09	3.7807e-11	-0.0137734	-4.81635e-05	-0.0303047	0.00689481
2022-03-15 13:32:41	13776771	-1.10337e-10	-1.35101e-10	5.49818e-09	-1.65818e-10	1.00404e-10	-7.14984e-11	-2.70202e-13	5.47069e-09	3.58442e-11	-0.0130694	-4.93909e-05	-0.0303103	0.00655205
2022-03-15 13:32:57	13792704	-1.30977e-10	-1.26614e-10	5.49647e-09	-1.62905e-10	1.06248e-10	-8.48731e-11	-2.53228e-13	5.46899e-09	3.79305e-11	-0.015519	-4.63025e-05	-0.029787	0.00693557
2022-03-15 13:33:13	13808637	-1.20862e-10	-1.31661e-10	5.50153e-09	-1.68172e-10	9.215e-11	-7.83186e-11	-2.63322e-13	5.47402e-09	3.28975e-11	-0.0143073	-4.81039e-05	-0.0307218	0.00600976
2022-03-15 13:33:29	13824571	-1.2457e-10	-1.32337e-10	5.51253e-09	-1.67624e-10	9.49064e-11	-8.07214e-11	-2.64674e-13	5.48497e-09	3.38816e-11	-0.0147168	-4.82544e-05	-0.0305606	0.00617717
2022-03-15 13:33:45	13840504	-1.26699e-10	-1.4321e-10	5.47483e-09	-1.70129e-10	1.09281e-10	-8.2101e-11	-2.8642e-13	5.44746e-09	3.90133e-11	-0.0150714	-5.25787e-05	-0.0312309	0.00716175
2022-03-15 13:34:01	13856436	-1.37309e-10	-1.39709e-10	6.09184e-09	-1.80427e-10	9.62429e-11	-8.89762e-11	-2.79418e-13	6.06138e-09	3.43587e-11	-0.0146792	-4.60981e-05	-0.0297666	0.00566846
2022-03-15 13:34:17	13872369	-1.31526e-10	-1.37467e-10	5.11894e-09	-1.75299e-10	9.79321e-11	-8.52288e-11	-2.74934e-13	5.09335e-09	3.49618e-11	-0.0167334	-5.39791e-05	-0.0344173	0.0068642
2022-03-15 13:34:33	13888301	-1.29526e-10	-1.3976e-10	5.02827e-09	-1.75805e-10	1.00259e-10	-8.39328e-11	-2.7952e-13	5.00313e-09	3.57925e-11	-0.0167761	-5.5869e-05	-0.035139	0.00715402
2022-03-15 13:34:49	13904234	-1.25172e-10	-1.39463e-10	5.2625e-09	-1.7646e-10	9.15279e-11	-8.11115e-11	-2.78926e-13	5.23619e-09	3.26755e-11	-0.0154906	-5.32689e-05	-0.0337001	0.00624032
2022-03-15 13:35:05	13920167	-1.30848e-10	-1.3676e-10	5.41115e-09	-1.74998e-10	9.54593e-11	-8.47895e-11	-2.7352e-13	5.38409e-09	3.4079e-11	-0.0157481	-5.08015e-05	-0.0325028	0.00632956
2022-03-15 13:35:21	13936101	-1.31096e-10	-1.28641e-10	5.51121e-09	-1.73332e-10	1.05987e-10	-8.49502e-11	-2.57282e-13	5.48365e-09	3.78374e-11	-0.0154915	-4.6918e-05	-0.0316089	0.00690003
2022-03-15 13:35:37	13952034	-1.29838e-10	-1.30494e-10	3.63298e-08	-1.7402e-10	1.05204e-10	-8.4135e-11	-2.60988e-13	3.61482e-08	3.75578e-11	-0.00232751	-7.21995e-06	-0.00481408	0.001039
2022-03-15 13:35:53	13968477	-1.12444e-10	-1.31374e-10	1.67431e-07	-1.69226e-10	6.77863e-11	-7.28637e-11	-2.62748e-13	1.66594e-07	2.41997e-11	-0.000437373	-1.57718e-06	-0.0010158	0.000145262
2022-03-15 13:36:09	13984140	-1.32977e-10	-1.54042e-10	2.87024e-07	-1.6972e-10	8.20221e-11	-8.61691e-11	-3.08084e-13	2.85589e-07	2.92819e-11	-0.000301724	-1.07877e-06	-0.000594281	0.000102532
2022-03-15 13:36:24	13999294	-1.30537e-10	-1.44356e-10	3.30741e-07	-1.81814e-10	6.96906e-11	-8.4588e-11	-2.88712e-13	3.29087e-07	2.48795e-11	-0.000257038	-8.77311e-07	-0.00055248	7.56017e-05
2022-03-15 13:36:39	14014446	-1.38889e-10	-1.58362e-10	3.72487e-07	-1.58648e-10	7.85207e-11	-9.00001e-11	-3.16724e-13	3.70625e-07	2.80319e-11	-0.000242834	-8.54568e-07	-0.000428056	7.56342e-05
2022-03-15 13:36:54	14029599	-1.42931e-10	-1.49711e-10	3.94255e-07	-1.69785e-10	7.00361e-11	-9.26193e-11	-2.99422e-13	3.92284e-07	2.50029e-11	-0.000236103	-7.63279e-07	-0.000432812	6.37367e-05
2022-03-15 13:37:09	14044751	-1.49704e-10	-1.53315e-10	4.10918e-07	-1.61593e-10	5.94474e-11	-9.70082e-11	-3.0663e-13	4.08863e-07	2.12227e-11	-0.000237263	-7.49957e-07	-0.000395225	5.19066e-05
2022-03-15 13:37:24	14059904	-1.49618e-10	-1.47408e-10	3.99899e-07	-1.7043e-10	4.99336e-11	-9.69525e-11	-2.94816e-13	3.979e-07	1.78263e-11	-0.000243661	-7.40931e-07	-0.000428324	4.4801e-05
2022-03-15 13:37:40	14075056	6.12222e-10	-1.51492e-10	4.02318e-07	-3.26907e-11	1.64989e-10	3.9672e-10	-3.02984e-13	4.00306e-07	5.89011e-11	0.00099104	-7.5688e-07	-8.16642e-05	0.00014714
2022-03-15 13:37:58	14093460	7.29629e-09	-1.49988e-10	3.94703e-07	1.68699e-10	1.91464e-10	4.728e-09	-2.99976e-13	3.92729e-07	6.83526e-11	0.0120388	-7.63823e-07	0.000429555	0.000174045
2022-03-15 13:38:11	14106402	9.15866e-09	-1.42964e-10	3.67022e-07	2.09484e-10	1.95035e-10	5.93481e-09	-2.85928e-13	3.65187e-07	6.96275e-11	0.0162514	-7.82963e-07	0.000573635	0.000190663
2022-03-15 13:38:25	14120386	1.12444e-08	-1.43466e-10	3.68724e-07	2.47819e-10	2.05831e-10	7.28637e-09	-2.86932e-13	3.6688e-07	7.34817e-11	0.0198603	-7.82086e-07	0.000675476	0.000200288
2022-03-15 13:38:37	14132799	1.20634e-08	-1.42166e-10	3.68813e-07	2.77543e-10	2.188e-10	7.81708e-09	-2.84332e-13	3.66969e-07	7.81116e-11	0.0213018	-7.74812e-07	0.000756312	0.000212856
2022-03-15 13:38:50	14145211	1.26036e-08	-1.43927e-10	3.68992e-07	2.84455e-10	2.09847e-10	8.16713e-09	-2.87854e-13	3.67147e-07	7.49154e-11	0.0222449	-7.84029e-07	0.000774771	0.000204047
2022-03-15 13:39:02	14157624	1.29382e-08	-1.39616e-10	3.64424e-07	2.99032e-10	1.92754e-10	8.38395e-09	-2.79232e-13	3.62602e-07	6.88132e-11	0.0231216	-7.70079e-07	0.000824684	0.000189776
2022-03-15 13:39:15	14170036	1.28965e-08	-1.39483e-10	3.62722e-07	2.90636e-10	2.03704e-10	8.35693e-09	-2.78966e-13	3.60908e-07	7.27223e-11	0.0231553	-7.72955e-07	0.00080529	0.000201498
2022-03-15 13:39:27	14182449	1.30981e-08	-1.44828e-10	3.61468e-07	2.99376e-10	1.96679e-10	8.48757e-09	-2.89656e-13	3.59661e-07	7.02144e-11	0.0235988	-8.05359e-07	0.000832385	0.000195224
2022-03-15 13:39:39	14194861	1.31048e-08	-1.27597e-10	3.60034e-07	2.97215e-10	1.95035e-10	8.49191e-09	-2.55194e-13	3.58234e-07	6.96275e-11	0.0237049	-7.12367e-07	0.000829668	0.000194363
2022-03-15 13:39:52	14207274	1.23133e-08	-1.32143e-10	3.64603e-07	2.65524e-10	2.07152e-10	7.97902e-09	-2.64286e-13	3.6278e-07	7.39533e-11	0.0219941	-7.28502e-07	0.000731915	0.000203852
2022-03-15 13:40:04	14219685	9.85838e-09	-1.51113e-10	4.15397e-07	1.31762e-10	1.78042e-10	6.38823e-09	-3.02226e-13	4.1332e-07	6.3561e-11	0.0154559	-7.31215e-07	0.000318789	0.000153782
2022-03-15 13:40:17	14232609	4.85082e-09	-1.45319e-10	3.42028e-07	7.03048e-12	1.37691e-10	3.14333e-09	-2.90638e-13	3.40318e-07	4.91557e-11	0.00923646	-8.54019e-07	2.06586e-05	0.000144441
2022-03-15 13:40:30	14245552	3.02338e-09	-1.51533e-10	3.41043e-07	-5.60504e-11	1.29798e-10	1.95915e-09	-3.03066e-13	3.39338e-07	4.63379e-11	0.00577345	-8.9311e-07	-0.000165176	0.000136554
2022-03-15 13:40:43	14258496	1.92742e-09	-1.48196e-10	3.46776e-07	-8.94936e-11	1.33783e-10	1.24897e-09	-2.96392e-13	3.45042e-07	4.77605e-11	0.00361976	-8.59002e-07	-0.00025937	0.000138419
2022-03-15 13:40:56	14271439	1.27205e-09	-1.50725e-10	3.61916e-07	-1.12272e-10	1.19132e-10	8.24288e-10	-3.0145e-13	3.60106e-07	4.25301e-11	0.00228901	-8.37114e-07	-0.000311775	0.000118104
2022-03-15 13:41:10	14285421	7.80104e-10	-1.62406e-10	3.79653e-07	-1.34912e-10	1.02124e-10	5.05507e-10	-3.24812e-13	3.77755e-07	3.64583e-11	0.00133819	-8.59849e-07	-0.000357142	9.65131e-05
2022-03-15 13:41:25	14300574	4.73149e-10	-1.57769e-10	3.89328e-07	-1.34052e-10	9.5045e-11	3.06601e-10	-3.15538e-13	3.87381e-07	3.39311e-11	0.00079147	-8.14541e-07	-0.000346047	8.75909e-05
2022-03-15 13:41:40	14315726	2.96602e-10	-1.6645e-10	3.90583e-07	-1.55509e-10	1.24016e-10	1.92198e-10	-3.329e-13	3.8863e-07	4.42737e-11	0.000494553	-8.56599e-07	-0.000400147	0.000113923
2022-03-15 13:41:55	14330879	1.60873e-10	-1.5053e-10	2.67853e-07	-1.6198e-10	1.2225e-10	1.04246e-10	-3.0106e-13	2.66514e-07	4.36432e-11	0.000391146	-1.12962e-06	-0.000607774	0.000163756
2022-03-15 13:42:11	14346031	1.16852e-10	-1.48268e-10	1.45752e-07	-1.67291e-10	1.64306e-10	7.57201e-11	-2.96536e-13	1.45023e-07	5.86572e-11	0.000522124	-2.04475e-06	-0.00115355	0.000404468
2022-03-15 13:42:26	14361184	6.90578e-11	-1.50581e-10	7.81165e-08	-1.55767e-10	1.75009e-10	4.47495e-11	-3.01162e-13	7.77259e-08	6.24782e-11	0.000575734	-3.87467e-06	-0.00200405	0.000803827
2022-03-15 13:42:41	14376336	2.59397e-11	-1.4365e-10	4.18297e-08	-1.61421e-10	1.64006e-10	1.68089e-11	-2.873e-13	4.16206e-08	5.85501e-11	0.000403861	-6.90284e-06	-0.0038784	0.00140676
2022-03-15 13:42:56	14391999	1.18464e-11	-1.45268e-10	2.44377e-08	-1.64775e-10	1.58078e-10	7.67647e-12	-2.90536e-13	2.43155e-08	5.64338e-11	0.000315702	-1.19486e-05	-0.00677654	0.0023209
2022-03-15 13:43:12	14407401	-1.91779e-11	-1.54512e-10	1.55964e-08	-1.79148e-10	1.53571e-10	-1.24273e-11	-3.09024e-13	1.55184e-08	5.48248e-11	-0.000800808	-1.99134e-05	-0.0115442	0.00353289
2022-03-15 13:43:27	14422804	-3.14222e-11	-1.47766e-10	1.10769e-08	-1.63593e-10	1.43919e-10	-2.03616e-11	-2.95532e-13	1.10215e-08	5.13791e-11	-0.00184744	-2.68141e-05	-0.0148431	0.00466171
2022-03-15 13:43:43	14438206	-3.87751e-11	-1.51943e-10	8.7085e-09	-1.77073e-10	1.46284e-10	-2.51263e-11	-3.03886e-13	8.66496e-09	5.22234e-11	-0.00289976	-3.50707e-05	-0.0204355	0.00602696
2022-03-15 13:43:58	14453609	-5.07399e-11	-1.40261e-10	7.51092e-09	-1.7173e-10	1.4408e-10	-3.28795e-11	-2.80522e-13	7.47337e-09	5.14366e-11	-0.00439955	-3.75362e-05	-0.0229789	0.00688265
2022-03-15 13:44:14	14469011	-5.63191e-11	-1.55198e-10	6.79887e-09	-1.68086e-10	1.30781e-10	-3.64948e-11	-3.10396e-13	6.76488e-09	4.66888e-11	-0.00539474	-4.58835e-05	-0.0248469	0.00690165
2022-03-15 13:44:30	14485454	-8.03453e-11	-1.4963e-10	6.43713e-09	-1.79427e-10	1.27579e-10	-5.20638e-11	-2.9926e-13	6.40494e-09	4.55457e-11	-0.00812868	-4.67233e-05	-0.0280138	0.00711102
2022-03-15 13:44:46	14501387	-8.00443e-11	-1.51728e-10	6.20214e-09	-1.75267e-10	1.29644e-10	-5.18687e-11	-3.03456e-13	6.17113e-09	4.62829e-11	-0.00840506	-4.91735e-05	-0.0284011	0.00749991
2022-03-15 13:45:02	14517321	-7.73138e-11	-1.54502e-10	6.07929e-09	-1.72515e-10	1.45201e-10	-5.00993e-11	-3.09004e-13	6.04889e-09	5.18368e-11	-0.0082824	-5.10844e-05	-0.0285201	0.00856963
2022-03-15 13:45:18	14533254	-8.86443e-11	-1.49916e-10	5.98558e-09	-1.8161e-10	1.3052e-10	-5.74415e-11	-2.99832e-13	5.95565e-09	4.65956e-11	-0.00964487	-5.03441e-05	-0.0304937	0.00782377
2022-03-15 13:45:34	14549185	-9.17188e-11	-1.47121e-10	5.92747e-09	-1.76643e-10	1.22089e-10	-5.94338e-11	-2.94242e-13	5.89783e-09	4.35858e-11	-0.0100772	-4.98899e-05	-0.0299505	0.00739013
2022-03-15 13:45:50	14565119	-9.80721e-11	-1.42012e-10	5.86331e-09	-1.7961e-10	1.23125e-10	-6.35507e-11	-2.84024e-13	5.83399e-09	4.39556e-11	-0.0108932	-4.86843e-05	-0.0307868	0.0075344
2022-03-15 13:46:06	14581051	-9.58791e-11	-1.4708e-10	5.85964e-09	-1.74493e-10	1.36071e-10	-6.21297e-11	-2.9416e-13	5.83034e-09	4.85773e-11	-0.0106563	-5.04533e-05	-0.0299284	0.00833182
2022-03-15 13:46:21	14596984	-9.65455e-11	-1.29348e-10	5.8373e-09	-1.77224e-10	1.28339e-10	-6.25615e-11	-2.58696e-13	5.80811e-09	4.5817e-11	-0.0107714	-4.45405e-05	-0.0305132	0.00788845
2022-03-15 13:46:37	14612916	-9.58253e-11	-1.3119e-10	5.84067e-09	-1.71644e-10	1.23824e-10	-6.20948e-11	-2.6238e-13	5.81147e-09	4.42052e-11	-0.0106849	-4.51487e-05	-0.0295354	0.00760654
2022-03-15 13:46:53	14628849	-1.11971e-10	-1.44224e-10	5.84252e-09	-1.7602e-10	1.12214e-10	-7.25572e-11	-2.88448e-13	5.81331e-09	4.00604e-11	-0.0124812	-4.96186e-05	-0.0302788	0.00689115
2022-03-15 13:47:09	14644780	-1.0994e-10	-1.4366e-10	5.85572e-09	-1.75719e-10	1.09642e-10	-7.12411e-11	-2.8732e-13	5.82644e-09	3.91422e-11	-0.0122272	-4.93131e-05	-0.0301589	0.00671803
2022-03-15 13:47:25	14660714	-1.0952e-10	-1.43455e-10	5.86683e-09	-1.77772e-10	1.41424e-10	-7.0969e-11	-2.8691e-13	5.8375e-09	5.04884e-11	-0.0121574	-4.91495e-05	-0.0304535	0.00864898
2022-03-15 13:47:41	14676647	-1.15927e-10	-1.42084e-10	5.87721e-09	-1.8075e-10	1.19371e-10	-7.51207e-11	-2.84168e-13	5.84782e-09	4.26154e-11	-0.0128459	-4.85938e-05	-0.0309089	0.0072874
2022-03-15 13:47:57	14692581	-1.164e-10	-1.3978e-10	5.85959e-09	-1.69548e-10	1.05242e-10	-7.54272e-11	-2.7956e-13	5.83029e-09	3.75714e-11	-0.0129371	-4.79496e-05	-0.0290805	0.00644417
2022-03-15 13:48:13	14708514	-1.14336e-10	-1.42022e-10	5.87217e-09	-1.74934e-10	1.17727e-10	-7.40897e-11	-2.84044e-13	5.84281e-09	4.20285e-11	-0.0126805	-4.86143e-05	-0.0299401	0.00719321
2022-03-15 13:48:29	14724446	-1.10886e-10	-1.3592e-10	5.83602e-09	-1.74891e-10	1.10686e-10	-7.18541e-11	-2.7184e-13	5.80684e-09	3.95149e-11	-0.0123741	-4.68138e-05	-0.0301181	0.00680489
2022-03-15 13:48:45	14740379	-1.19195e-10	-1.45575e-10	5.79452e-09	-1.73762e-10	1.04029e-10	-7.72384e-11	-2.9115e-13	5.76555e-09	3.71384e-11	-0.0133965	-5.04982e-05	-0.030138	0.00644143
2022-03-15 13:49:01	14756310	-1.24871e-10	-1.38582e-10	5.75903e-09	-1.75289e-10	1.074e-10	-8.09164e-11	-2.77164e-13	5.73023e-09	3.83418e-11	-0.014121	-4.83687e-05	-0.0305902	0.00669114
2022-03-15 13:49:17	14772244	-1.22087e-10	-1.2557e-10	5.73435e-09	-1.87597e-10	1.07699e-10	-7.91124e-11	-2.5114e-13	5.70568e-09	3.84485e-11	-0.0138656	-4.40158e-05	-0.032879	0.00673865
2022-03-15 13:49:33	14788177	-1.30365e-10	-1.35767e-10	5.7007e-09	-1.88543e-10	1.08021e-10	-8.44765e-11	-2.71534e-13	5.6722e-09	3.85635e-11	-0.0148931	-4.7871e-05	-0.0332399	0.00679869
2022-03-15 13:49:49	14804111	-1.26e-10	-1.51186e-10	5.69023e-09	-1.87167e-10	1.07484e-10	-8.1648e-11	-3.02372e-13	5.66178e-09	3.83718e-11	-0.0144209	-5.34058e-05	-0.033058	0.00677734
2022-03-15 13:50:05	14820044	-1.11584e-10	-1.47469e-10	5.6836e-09	-1.85286e-10	1.09258e-10	-7.23064e-11	-2.94938e-13	5.65518e-09	3.90051e-11	-0.0127859	-5.21536e-05	-0.0327639	0.00689723
2022-03-15 13:50:20	14835977	-1.35503e-10	-1.40415e-10	5.62528e-09	-1.81975e-10	1.13734e-10	-8.78059e-11	-2.8083e-13	5.59715e-09	4.0603e-11	-0.0156876	-5.01737e-05	-0.0325121	0.00725423
2022-03-15 13:50:36	14851911	-1.3603e-10	-1.44705e-10	5.63819e-09	-1.72805e-10	1.00742e-10	-8.81474e-11	-2.8941e-13	5.61e-09	3.59649e-11	-0.0157126	-5.15882e-05	-0.030803	0.00641086
2022-03-15 13:50:52	14867844	-1.2672e-10	-1.42114e-10	5.64862e-09	-1.81567e-10	1.12106e-10	-8.21146e-11	-2.84228e-13	5.62038e-09	4.00218e-11	-0.0146102	-5.0571e-05	-0.0323051	0.00712085
2022-03-15 13:51:08	14883777	-1.3646e-10	-1.53898e-10	5.62859e-09	-1.83018e-10	1.071e-10	-8.84261e-11	-3.07796e-13	5.60045e-09	3.82347e-11	-0.0157891	-5.49592e-05	-0.0326792	0.00682708
2022-03-15 13:51:24	14899710	-1.36503e-10	-1.50704e-10	5.60172e-09	-1.8319e-10	1.03199e-10	-8.84539e-11	-3.01408e-13	5.57371e-09	3.6842e-11	-0.0158698	-5.40767e-05	-0.0328668	0.00660997
2022-03-15 13:51:40	14915644	-1.31569e-10	-1.3934e-10	5.59968e-09	-1.89941e-10	1.06294e-10	-8.52567e-11	-2.7868e-13	5.57168e-09	3.7947e-11	-0.0153018	-5.00172e-05	-0.0340904	0.00681068
2022-03-15 13:51:56	14931575	-1.40319e-10	-1.48994e-10	5.57925e-09	-1.87651e-10	9.36014e-11	-9.09267e-11	-2.97988e-13	5.55135e-09	3.34157e-11	-0.0163792	-5.36784e-05	-0.0338027	0.00601938
2022-03-15 13:52:12	14947509	-1.38954e-10	-1.41961e-10	5.55183e-09	-1.78922e-10	8.94393e-11	-9.00422e-11	-2.83922e-13	5.52407e-09	3.19298e-11	-0.0163	-5.13972e-05	-0.0323895	0.00578013
2022-03-15 13:52:28	14963441	-1.44092e-10	-1.44356e-10	5.54535e-09	-1.87382e-10	8.54929e-11	-9.33716e-11	-2.88712e-13	5.51762e-09	3.0521e-11	-0.0169224	-5.23254e-05	-0.0339606	0.00553154
2022-03-15 13:52:44	14979374	-1.36653e-10	-1.62396e-10	5.53829e-09	-1.90769e-10	9.20886e-11	-8.85511e-11	-3.24792e-13	5.5106e-09	3.28756e-11	-0.0160692	-5.89395e-05	-0.0346186	0.00596589
2022-03-15 13:53:00	14995307	-1.39567e-10	-1.46783e-10	5.52908e-09	-1.85114e-10	9.46843e-11	-9.04394e-11	-2.93566e-13	5.50143e-09	3.38023e-11	-0.0164392	-5.33617e-05	-0.0336483	0.00614427
2022-03-15 13:53:16	15011241	-1.37825e-10	-1.45002e-10	5.51475e-09	-1.83803e-10	1.04259e-10	-8.93106e-11	-2.90004e-13	5.48718e-09	3.72205e-11	-0.0162762	-5.28512e-05	-0.0334968	0.00678317
2022-03-15 13:53:32	15027174	-1.38406e-10	-1.49906e-10	5.50594e-09	-1.85974e-10	9.70493e-11	-8.96871e-11	-2.99812e-13	5.47841e-09	3.46466e-11	-0.016371	-5.47261e-05	-0.0339467	0.00632421
2022-03-15 13:53:48	15043106	-1.36299e-10	-1.47878e-10	5.48578e-09	-1.95585e-10	1.06839e-10	-8.83218e-11	-2.95756e-13	5.45835e-09	3.81415e-11	-0.016181	-5.41841e-05	-0.0358322	0.00698774
2022-03-15 13:54:04	15059039	-1.45339e-10	-1.43455e-10	5.49293e-09	-1.7488e-10	8.302e-11	-9.41797e-11	-2.8691e-13	5.46547e-09	2.96381e-11	-0.0172318	-5.24951e-05	-0.0319973	0.0054228
2022-03-15 13:54:19	15074970	-1.42039e-10	-1.47449e-10	5.48071e-09	-1.85146e-10	1.02071e-10	-9.20413e-11	-2.94898e-13	5.45331e-09	3.64393e-11	-0.0168781	-5.40769e-05	-0.0339511	0.00668206
2022-03-15 13:54:35	15090904	-1.41824e-10	-1.37937e-10	5.45697e-09	-1.83932e-10	9.96136e-11	-9.1902e-11	-2.75874e-13	5.42969e-09	3.55621e-11	-0.0169258	-5.08085e-05	-0.0338753	0.00654956
2022-03-15 13:54:51	15106836	-1.47554e-10	-1.40374e-10	5.46388e-09	-1.83835e-10	1.20046e-10	-9.5615e-11	-2.80748e-13	5.43656e-09	4.28564e-11	-0.0175874	-5.16407e-05	-0.0338146	0.007883
2022-03-15 13:55:07	15122769	-1.42028e-10	-1.43364e-10	5.34638e-09	-1.78374e-10	7.80679e-11	-9.20341e-11	-2.86728e-13	5.31965e-09	2.78702e-11	-0.0173008	-5.38998e-05	-0.0335312	0.00523911
2022-03-15 13:55:23	15138702	-1.34321e-10	-1.46435e-10	5.06494e-09	-1.95047e-10	9.24729e-11	-8.704e-11	-2.9287e-13	5.03962e-09	3.30128e-11	-0.0172712	-5.81136e-05	-0.0387028	0.00655066
2022-03-15 13:55:39	15154636	-1.43082e-10	-1.47305e-10	5.10447e-09	-1.86264e-10	8.10393e-11	-9.27171e-11	-2.9461e-13	5.07895e-09	2.8931e-11	-0.0182552	-5.80061e-05	-0.0366737	0.00569626
2022-03-15 13:55:55	15170569	-1.33192e-10	-1.52742e-10	5.33081e-09	-1.85791e-10	9.21043e-11	-8.63084e-11	-3.05484e-13	5.30416e-09	3.28812e-11	-0.0162718	-5.75933e-05	-0.0350274	0.00619915
2022-03-15 13:56:11	15186501	-1.40545e-10	-1.48134e-10	5.47724e-09	-1.94166e-10	8.2675e-11	-9.10732e-11	-2.96268e-13	5.44985e-09	2.9515e-11	-0.0167111	-5.43626e-05	-0.0356277	0.00541574
2022-03-15 13:56:27	15202434	-1.34837e-10	-1.50755e-10	6.04673e-09	-1.90865e-10	1.0892e-10	-8.73744e-11	-3.0151e-13	6.0165e-09	3.88844e-11	-0.0145225	-5.01139e-05	-0.0317236	0.00646297
2022-03-15 13:56:43	15218367	-1.25731e-10	-1.47623e-10	9.04783e-08	-1.66839e-10	8.34429e-11	-8.14737e-11	-2.95246e-13	9.00259e-08	2.97891e-11	-0.000905003	-3.27957e-06	-0.00185323	0.000330895
2022-03-15 13:57:00	15235071	-1.29591e-10	-1.54769e-10	2.59881e-07	-1.76718e-10	7.92807e-11	-8.3975e-11	-3.09538e-13	2.58582e-07	2.83032e-11	-0.000324752	-1.19706e-06	-0.000683413	0.000109456
2022-03-15 13:57:15	15250224	-1.409e-10	-1.56273e-10	3.13541e-07	-1.76546e-10	7.09268e-11	-9.13032e-11	-3.12546e-13	3.11973e-07	2.53209e-11	-0.000292664	-1.00184e-06	-0.000565901	8.11636e-05
2022-03-15 13:57:30	15265376	-1.46425e-10	-1.50766e-10	3.58959e-07	-1.68839e-10	7.62864e-11	-9.48834e-11	-3.01532e-13	3.57164e-07	2.72342e-11	-0.000265658	-8.44239e-07	-0.000472721	7.62513e-05
2022-03-15 13:57:45	15280529	-1.51918e-10	-1.62744e-10	3.7177e-07	-1.68333e-10	6.79859e-11	-9.84429e-11	-3.25488e-13	3.69911e-07	2.4271e-11	-0.000266126	-8.79909e-07	-0.000455063	6.5613e-05
2022-03-15 13:58:00	15295681	-1.54638e-10	-1.61597e-10	3.92374e-07	-1.7817e-10	4.87281e-11	-1.00205e-10	-3.23194e-13	3.90412e-07	1.73959e-11	-0.000256666	-8.27828e-07	-0.000456364	4.45579e-05
2022-03-15 13:58:15	15310834	-1.43232e-10	-1.63798e-10	4.07603e-07	-1.70139e-10	6.21656e-11	-9.28143e-11	-3.27596e-13	4.05565e-07	2.21931e-11	-0.000228852	-8.07752e-07	-0.000419511	5.47215e-05
2022-03-15 13:58:30	15325985	-1.45877e-10	-1.5695e-10	4.13516e-07	-1.61163e-10	9.01457e-11	-9.45283e-11	-3.139e-13	4.11448e-07	3.2182e-11	-0.000229745	-7.62915e-07	-0.000391697	7.82164e-05
2022-03-15 13:58:46	15341139	2.42185e-09	-1.52772e-10	4.01601e-07	4.24086e-11	1.82059e-10	1.56936e-09	-3.05544e-13	3.99593e-07	6.49951e-11	0.00392739	-7.64638e-07	0.000106129	0.000162653
2022-03-15 13:59:04	15359541	8.41706e-09	-1.55936e-10	3.59138e-07	1.57938e-10	1.86811e-10	5.45425e-09	-3.11872e-13	3.57342e-07	6.66915e-11	0.0152634	-8.72754e-07	0.00044198	0.000186632
2022-03-15 13:59:18	15373524	1.03071e-08	-1.47274e-10	3.66484e-07	2.26039e-10	1.97477e-10	6.679e-09	-2.94548e-13	3.64652e-07	7.04993e-11	0.0183161	-8.07752e-07	0.000619877	0.000193333
2022-03-15 13:59:30	15385937	1.13707e-08	-1.57492e-10	3.67201e-07	2.45013e-10	2.059e-10	7.36821e-09	-3.14984e-13	3.65365e-07	7.35063e-11	0.0201667	-8.62108e-07	0.000670598	0.000201186
2022-03-15 13:59:43	15398351	1.23234e-08	-1.5135e-10	3.67828e-07	2.72533e-10	1.99396e-10	7.98556e-09	-3.027e-13	3.65989e-07	7.11844e-11	0.0218191	-8.27074e-07	0.000744648	0.000194499
2022-03-15 13:59:55	15410764	1.26083e-08	-1.48124e-10	3.64424e-07	2.6833e-10	2.02107e-10	8.17018e-09	-2.96248e-13	3.62602e-07	7.21522e-11	0.0225321	-8.17006e-07	0.000740013	0.000198985
2022-03-15 14:00:08	15423176	1.27695e-08	-1.48451e-10	3.61288e-07	2.84562e-10	1.83763e-10	8.27464e-09	-2.96902e-13	3.59482e-07	6.56034e-11	0.0230182	-8.25917e-07	0.00079159	0.000182494
2022-03-15 14:00:20	15435589	1.2832e-08	-1.5614e-10	3.57167e-07	2.88658e-10	2.07329e-10	8.31514e-09	-3.1228e-13	3.55381e-07	7.40165e-11	0.0233978	-8.78718e-07	0.000812249	0.000208273
2022-03-15 14:00:33	15448001	1.28435e-08	-1.46804e-10	3.5672e-07	2.83369e-10	1.94759e-10	8.32259e-09	-2.93608e-13	3.54936e-07	6.9529e-11	0.0234481	-8.27213e-07	0.000798366	0.000195891
2022-03-15 14:00:45	15460414	1.29241e-08	-1.4538e-10	3.57974e-07	2.76693e-10	1.83034e-10	8.37482e-09	-2.9076e-13	3.56184e-07	6.53431e-11	0.0235126	-8.16319e-07	0.000776826	0.000183453
2022-03-15 14:00:57	15472826	1.06444e-08	-1.52527e-10	3.65588e-07	2.25663e-10	1.54539e-10	6.89757e-09	-3.05054e-13	3.6376e-07	5.51704e-11	0.0189619	-8.38613e-07	0.000620362	0.000151667
2022-03-15 14:01:10	15485749	6.49745e-09	-1.53642e-10	3.44716e-07	3.48514e-11	1.39519e-10	4.21035e-09	-3.07284e-13	3.42992e-07	4.98083e-11	0.0122753	-8.95892e-07	0.00010161	0.000145217
2022-03-15 14:01:23	15498692	3.78281e-09	-1.61054e-10	3.39341e-07	-2.89927e-11	1.2344e-10	2.45126e-09	-3.22108e-13	3.37644e-07	4.40681e-11	0.00725989	-9.53986e-07	-8.58676e-05	0.000130516
2022-03-15 14:01:36	15511635	2.37784e-09	-1.5913e-10	3.39341e-07	-8.37638e-11	1.21329e-10	1.54084e-09	-3.1826e-13	3.37644e-07	4.33145e-11	0.0045635	-9.4259e-07	-0.000248083	0.000128284
2022-03-15 14:01:49	15524579	1.52289e-09	-1.64382e-10	3.50628e-07	-1.21474e-10	1.04881e-10	9.86833e-10	-3.28764e-13	3.48875e-07	3.74425e-11	0.00282862	-9.42355e-07	-0.000348188	0.000107324
2022-03-15 14:02:02	15537521	9.92137e-10	-1.62938e-10	3.65947e-07	-1.30203e-10	1.01534e-10	6.42905e-10	-3.25876e-13	3.64117e-07	3.62476e-11	0.00176565	-8.94975e-07	-0.000357585	9.95494e-05
2022-03-15 14:02:16	15551504	6.25735e-10	-1.66604e-10	3.8252e-07	-1.49672e-10	9.52214e-11	4.05476e-10	-3.33208e-13	3.80607e-07	3.3994e-11	0.00106534	-8.75464e-07	-0.000393245	8.93152e-05
2022-03-15 14:02:31	15566657	3.7626e-10	-1.6555e-10	3.89866e-07	-1.44404e-10	8.36114e-11	2.43816e-10	-3.311e-13	3.87917e-07	2.98493e-11	0.000628528	-8.53534e-07	-0.000372255	7.69476e-05
2022-03-15 14:02:46	15581811	2.34661e-10	-1.62324e-10	3.53853e-07	-1.58755e-10	1.14479e-10	1.5206e-10	-3.24648e-13	3.52084e-07	4.0869e-11	0.000431887	-9.22076e-07	-0.000450901	0.000116078
2022-03-15 14:03:01	15596964	1.31827e-10	-1.68436e-10	2.1052e-07	-1.64775e-10	1.31264e-10	8.54239e-11	-3.36872e-13	2.09467e-07	4.68612e-11	0.000407815	-1.60823e-06	-0.000786638	0.000223716
2022-03-15 14:03:17	15612116	6.98533e-11	-1.59611e-10	1.12695e-07	-1.72601e-10	1.54661e-10	4.52649e-11	-3.19222e-13	1.12132e-07	5.5214e-11	0.000403677	-2.84685e-06	-0.00153927	0.000492404
2022-03-15 14:03:32	15627269	3.61629e-11	-1.60226e-10	5.94053e-08	-1.75407e-10	1.59161e-10	2.34336e-11	-3.20452e-13	5.91083e-08	5.68205e-11	0.000396451	-5.42144e-06	-0.00296755	0.000961295
2022-03-15 14:03:47	15642932	-4.40749e-13	-1.49076e-10	3.32829e-08	-1.79804e-10	1.67077e-10	-2.85605e-13	-2.98152e-13	3.31165e-08	5.96465e-11	-8.62427e-06	-9.00313e-06	-0.00542944	0.00180111
2022-03-15 14:04:03	15658336	-1.95864e-11	-1.50807e-10	2.01062e-08	-1.70365e-10	1.4762e-10	-1.2692e-11	-3.01614e-13	2.00057e-08	5.27003e-11	-0.00063442	-1.50764e-05	-0.00851584	0.00263427
2022-03-15 14:04:18	15673739	-1.86297e-11	-1.5357e-10	1.34173e-08	-1.77019e-10	1.49079e-10	-1.2072e-11	-3.0714e-13	1.33502e-08	5.32212e-11	-0.000904259	-2.30064e-05	-0.0132596	0.00398654
2022-03-15 14:04:34	15689142	-4.70956e-11	-1.63348e-10	9.96942e-09	-1.92069e-10	1.46322e-10	-3.05179e-11	-3.26696e-13	9.91957e-09	5.2237e-11	-0.00307654	-3.29345e-05	-0.0193626	0.00526605
2022-03-15 14:04:49	15704546	-5.72006e-11	-1.51359e-10	8.19739e-09	-1.70817e-10	1.50292e-10	-3.7066e-11	-3.02718e-13	8.1564e-09	5.36542e-11	-0.0045444	-3.71142e-05	-0.0209427	0.00657817
2022-03-15 14:05:04	15719949	-6.07804e-11	-1.45595e-10	7.17425e-09	-1.79202e-10	1.39857e-10	-3.93857e-11	-2.9119e-13	7.13838e-09	4.99289e-11	-0.00551746	-4.07922e-05	-0.025104	0.00699444
2022-03-15 14:05:21	15736392	-7.27021e-11	-1.53652e-10	6.65268e-09	-1.82652e-10	1.44533e-10	-4.7111e-11	-3.07304e-13	6.61942e-09	5.15983e-11	-0.00711709	-4.64246e-05	-0.0275934	0.00779499
2022-03-15 14:05:37	15752326	-8.44948e-11	-1.389e-10	6.37448e-09	-1.83856e-10	1.14817e-10	-5.47526e-11	-2.778e-13	6.34261e-09	4.09897e-11	-0.00863251	-4.3799e-05	-0.0289874	0.00646259
2022-03-15 14:05:53	15768259	-9.33528e-11	-1.55486e-10	6.19257e-09	-1.86662e-10	1.53786e-10	-6.04926e-11	-3.10972e-13	6.16161e-09	5.49016e-11	-0.00981767	-5.04693e-05	-0.0302944	0.00891027
2022-03-15 14:06:09	15784191	-9.70723e-11	-1.60276e-10	6.06272e-09	-1.829e-10	1.31165e-10	-6.29029e-11	-3.20552e-13	6.03241e-09	4.68259e-11	-0.0104275	-5.31383e-05	-0.0303196	0.00776239
2022-03-15 14:06:25	15800124	-1.0679e-10	-1.54728e-10	5.99536e-09	-2.01368e-10	1.08429e-10	-6.91999e-11	-3.09456e-13	5.96538e-09	3.87092e-11	-0.0116002	-5.18753e-05	-0.0337561	0.00648896
2022-03-15 14:06:41	15816056	-9.61801e-11	-1.55372e-10	5.91416e-09	-1.86479e-10	1.13973e-10	-6.23247e-11	-3.10744e-13	5.88459e-09	4.06884e-11	-0.0105912	-5.28064e-05	-0.0316894	0.00691439
2022-03-15 14:06:56	15831989	-1.21474e-10	-1.5829e-10	5.90347e-09	-1.88737e-10	1.23509e-10	-7.87152e-11	-3.1658e-13	5.87395e-09	4.40927e-11	-0.0134007	-5.38956e-05	-0.0321312	0.00750648
2022-03-15 14:07:12	15847922	-1.0565e-10	-1.55444e-10	5.83557e-09	-1.8849e-10	1.17251e-10	-6.84612e-11	-3.10888e-13	5.80639e-09	4.18586e-11	-0.0117907	-5.35424e-05	-0.0324625	0.00720906
2022-03-15 14:07:28	15863856	-1.17035e-10	-1.63552e-10	5.80532e-09	-1.86039e-10	1.10171e-10	-7.58387e-11	-3.27104e-13	5.77629e-09	3.9331e-11	-0.0131293	-5.66287e-05	-0.0322073	0.00680905
2022-03-15 14:07:44	15879789	-1.13734e-10	-1.59744e-10	5.79813e-09	-1.85286e-10	1.02179e-10	-7.36996e-11	-3.19488e-13	5.76914e-09	3.64779e-11	-0.0127748	-5.53788e-05	-0.0321167	0.00632294
2022-03-15 14:08:00	15895722	-1.25334e-10	-1.62037e-10	5.78758e-09	-2.01465e-10	9.88921e-11	-8.12164e-11	-3.24074e-13	5.75864e-09	3.53045e-11	-0.0141034	-5.62761e-05	-0.0349848	0.0061307
2022-03-15 14:08:16	15911656	-1.25366e-10	-1.61372e-10	5.7543e-09	-1.97659e-10	1.07085e-10	-8.12372e-11	-3.22744e-13	5.72553e-09	3.82293e-11	-0.0141886	-5.63693e-05	-0.0345224	0.006677
2022-03-15 14:08:32	15927589	-1.27344e-10	-1.59416e-10	5.75649e-09	-1.95649e-10	1.01104e-10	-8.25189e-11	-3.18832e-13	5.72771e-09	3.60941e-11	-0.014407	-5.56649e-05	-0.0341583	0.00630167
2022-03-15 14:08:48	15943522	-1.36718e-10	-1.52475e-10	5.71974e-09	-1.89855e-10	9.893e-11	-8.85933e-11	-3.0495e-13	5.69114e-09	3.5318e-11	-0.0155669	-5.35833e-05	-0.0333597	0.00620579
2022-03-15 14:09:04	15959456	-1.36954e-10	-1.67085e-10	5.67069e-09	-2.05475e-10	1.04282e-10	-8.87462e-11	-3.3417e-13	5.64234e-09	3.72287e-11	-0.0157286	-5.92255e-05	-0.0364167	0.0065981
2022-03-15 14:09:20	15975389	-1.37836e-10	-1.69736e-10	5.67102e-09	-1.94252e-10	1.05926e-10	-8.93177e-11	-3.39472e-13	5.64266e-09	3.78156e-11	-0.015829	-6.01616e-05	-0.0344256	0.00670172
2022-03-15 14:09:36	15991321	-1.3202e-10	-1.52004e-10	5.63618e-09	-1.92338e-10	9.22193e-11	-8.5549e-11	-3.04008e-13	5.608e-09	3.29223e-11	-0.0152548	-5.42097e-05	-0.0342971	0.00587059
2022-03-15 14:09:52	16007254	-1.47801e-10	-1.6257e-10	5.64211e-09	-1.92618e-10	1.05549e-10	-9.5775e-11	-3.2514e-13	5.6139e-09	3.7681e-11	-0.0170603	-5.7917e-05	-0.0343109	0.00671209
2022-03-15 14:10:08	16023186	-1.24345e-10	-1.51195e-10	5.65442e-09	-1.87511e-10	1.09726e-10	-8.05756e-11	-3.0239e-13	5.62615e-09	3.91722e-11	-0.0143216	-5.37473e-05	-0.0333285	0.00696252
2022-03-15 14:10:24	16039119	-1.36944e-10	-1.67443e-10	5.65385e-09	-2.02142e-10	9.16971e-11	-8.87397e-11	-3.34886e-13	5.62558e-09	3.27359e-11	-0.0157743	-5.95291e-05	-0.0359326	0.00581911
2022-03-15 14:10:40	16055052	-1.37374e-10	-1.67873e-10	5.67204e-09	-1.87877e-10	1.09704e-10	-8.90184e-11	-3.35746e-13	5.64368e-09	3.91643e-11	-0.0157731	-5.94906e-05	-0.0332898	0.0069395
2022-03-15 14:10:55	16070986	-1.31751e-10	-1.561e-10	5.67393e-09	-2.00207e-10	8.70514e-11	-8.53746e-11	-3.122e-13	5.64556e-09	3.10773e-11	-0.0151224	-5.53001e-05	-0.0354627	0.00550474
2022-03-15 14:11:11	16086919	-1.40566e-10	-1.58024e-10	5.67915e-09	-1.97928e-10	9.58586e-11	-9.10868e-11	-3.16048e-13	5.65075e-09	3.42215e-11	-0.0161194	-5.59302e-05	-0.0350268	0.0060561
2022-03-15 14:11:27	16102851	-1.44092e-10	-1.58935e-10	5.64287e-09	-1.9437e-10	9.3755e-11	-9.33716e-11	-3.1787e-13	5.61466e-09	3.34705e-11	-0.01663	-5.66143e-05	-0.0346183	0.00596128
2022-03-15 14:11:43	16118784	-1.47242e-10	-1.65447e-10	5.65512e-09	-2.03916e-10	9.29643e-11	-9.54128e-11	-3.30894e-13	5.62684e-09	3.31883e-11	-0.0169567	-5.88063e-05	-0.0362399	0.0058982
2022-03-15 14:11:59	16134716	-1.50134e-10	-1.62897e-10	5.61299e-09	-1.9581e-10	1.02286e-10	-9.72868e-11	-3.25794e-13	5.58493e-09	3.65161e-11	-0.0174195	-5.83345e-05	-0.0350605	0.00653833
2022-03-15 14:12:15	16150649	-1.46307e-10	-1.61587e-10	5.60335e-09	-1.96434e-10	8.39343e-11	-9.48069e-11	-3.23174e-13	5.57533e-09	2.99645e-11	-0.0170047	-5.7965e-05	-0.0352327	0.00537449
2022-03-15 14:12:31	16166580	-1.46963e-10	-1.64453e-10	5.58493e-09	-1.99594e-10	1.00336e-10	-9.5232e-11	-3.28906e-13	5.55701e-09	3.582e-11	-0.0171373	-5.91876e-05	-0.0359175	0.00644591
2022-03-15 14:12:47	16182514	-1.4678e-10	-1.6383e-10	5.56916e-09	-2.0369e-10	9.57129e-11	-9.51134e-11	-3.2766e-13	5.54131e-09	3.41695e-11	-0.0171644	-5.91304e-05	-0.0367584	0.00616632
2022-03-15 14:13:03	16198446	-1.48511e-10	-1.62263e-10	5.54272e-09	-1.95735e-10	7.0374e-11	-9.62351e-11	-3.24526e-13	5.51501e-09	2.51235e-11	-0.0174497	-5.88442e-05	-0.0354913	0.00455548
2022-03-15 14:13:19	16214379	-1.58401e-10	-1.66511e-10	5.53284e-09	-1.99336e-10	9.41157e-11	-1.02644e-10	-3.33022e-13	5.50518e-09	3.35993e-11	-0.018645	-6.04925e-05	-0.0362088	0.00610322
2022-03-15 14:13:35	16230311	-1.57723e-10	-1.60931e-10	5.53678e-09	-1.96649e-10	8.67293e-11	-1.02205e-10	-3.21862e-13	5.5091e-09	3.09624e-11	-0.018552	-5.84237e-05	-0.0356953	0.00562023
2022-03-15 14:13:51	16246244	-1.53079e-10	-1.6386e-10	5.55083e-09	-1.95273e-10	9.37014e-11	-9.91952e-11	-3.2772e-13	5.52308e-09	3.34514e-11	-0.0179601	-5.93365e-05	-0.0353558	0.00605666
2022-03-15 14:14:07	16262176	-1.58401e-10	-1.54605e-10	5.57866e-09	-1.96982e-10	7.45971e-11	-1.02644e-10	-3.0921e-13	5.55077e-09	2.66312e-11	-0.0184918	-5.57058e-05	-0.0354873	0.00479775
2022-03-15 14:14:23	16278109	-1.50037e-10	-1.65733e-10	5.57242e-09	-1.92521e-10	8.27057e-11	-9.7224e-11	-3.31466e-13	5.54456e-09	2.95259e-11	-0.017535	-5.97822e-05	-0.0347225	0.00532521
2022-03-15 14:14:39	16294040	-1.42329e-10	-1.6297e-10	5.57785e-09	-1.94477e-10	7.83286e-11	-9.22292e-11	-3.2594e-13	5.54996e-09	2.79633e-11	-0.016618	-5.87283e-05	-0.0350411	0.00503847
2022-03-15 14:14:54	16309974	-1.65001e-10	-1.62416e-10	5.59905e-09	-1.95198e-10	9.635e-11	-1.06921e-10	-3.24832e-13	5.57105e-09	3.4397e-11	-0.0191922	-5.83071e-05	-0.0350379	0.00617423
2022-03-15 14:15:10	16325907	-1.65786e-10	-1.55936e-10	5.62518e-09	-2.00024e-10	7.87507e-11	-1.07429e-10	-3.11872e-13	5.59705e-09	2.8114e-11	-0.0191939	-5.57207e-05	-0.0357374	0.005023
2022-03-15 14:15:26	16341841	-1.66398e-10	-1.69511e-10	5.62658e-09	-1.98992e-10	7.56793e-11	-1.07826e-10	-3.39022e-13	5.59845e-09	2.70175e-11	-0.01926	-6.05564e-05	-0.0355441	0.00482589
2022-03-15 14:15:42	16357774	-1.57089e-10	-1.72143e-10	5.66917e-09	-1.99541e-10	8.73971e-11	-1.01794e-10	-3.44286e-13	5.64082e-09	3.12008e-11	-0.0180459	-6.10347e-05	-0.0353744	0.00553124
2022-03-15 14:15:58	16373706	-1.60142e-10	-1.76463e-10	6.66052e-09	-1.9925e-10	7.92271e-11	-1.03772e-10	-3.52926e-13	6.62722e-09	2.82841e-11	-0.0156585	-5.3254e-05	-0.0300654	0.00426787
2022-03-15 14:16:14	16389639	-1.63335e-10	-1.72665e-10	5.35621e-09	-2.05131e-10	7.85129e-11	-1.05841e-10	-3.4533e-13	5.32943e-09	2.80291e-11	-0.0198597	-6.47968e-05	-0.0384902	0.00525931
2022-03-15 14:16:30	16405571	-1.58057e-10	-1.59888e-10	5.22439e-09	-2.14204e-10	8.61379e-11	-1.02421e-10	-3.19776e-13	5.19827e-09	3.07512e-11	-0.0197029	-6.15159e-05	-0.0412068	0.00591567
2022-03-15 14:16:46	16421504	-1.51241e-10	-1.74497e-10	5.37687e-09	-2.05066e-10	8.44636e-11	-9.80042e-11	-3.48994e-13	5.34999e-09	3.01535e-11	-0.0183186	-6.52327e-05	-0.0383302	0.00563618
2022-03-15 14:17:02	16437437	-1.6585e-10	-1.66645e-10	5.54302e-09	-2.07721e-10	8.45179e-11	-1.07471e-10	-3.3329e-13	5.5153e-09	3.01729e-11	-0.0194859	-6.043e-05	-0.0376627	0.00547076
2022-03-15 14:17:18	16453370	-1.76514e-10	-1.69563e-10	5.62872e-09	-2.09441e-10	6.26494e-11	-1.14381e-10	-3.39126e-13	5.60058e-09	2.23658e-11	-0.0204231	-6.0552e-05	-0.0373963	0.00399349
2022-03-15 14:17:34	16469304	-1.66377e-10	-1.6859e-10	2.31247e-08	-2.10291e-10	8.05707e-11	-1.07812e-10	-3.3718e-13	2.30091e-08	2.87637e-11	-0.00468564	-1.46542e-05	-0.00913948	0.0012501
2022-03-15 14:17:50	16485747	-1.62389e-10	-1.75726e-10	1.4611e-07	-2.08506e-10	5.14309e-11	-1.05228e-10	-3.51452e-13	1.45379e-07	1.83608e-11	-0.000723817	-2.41748e-06	-0.00143422	0.000126296
2022-03-15 14:18:06	16501411	-1.60228e-10	-1.87295e-10	2.73677e-07	-2.09775e-10	4.82904e-11	-1.03828e-10	-3.7459e-13	2.72309e-07	1.72397e-11	-0.000381287	-1.37561e-06	-0.000770358	6.33093e-05
2022-03-15 14:18:21	16516564	-1.75375e-10	-1.8449e-10	3.19095e-07	-2.0613e-10	4.17022e-11	-1.13643e-10	-3.6898e-13	3.175e-07	1.48877e-11	-0.000357931	-1.16214e-06	-0.000649229	4.68904e-05
2022-03-15 14:18:36	16531715	-1.72268e-10	-1.82872e-10	3.64872e-07	-2.02174e-10	5.35809e-11	-1.1163e-10	-3.65744e-13	3.63048e-07	1.91284e-11	-0.000307479	-1.00743e-06	-0.00055688	5.26884e-05
2022-03-15 14:18:51	16546869	-1.82448e-10	-1.63962e-10	3.87716e-07	-2.01744e-10	4.79986e-11	-1.18226e-10	-3.27924e-13	3.85777e-07	1.71355e-11	-0.000306462	-8.50034e-07	-0.000522954	4.44181e-05
2022-03-15 14:19:07	16562021	-1.78847e-10	-1.81521e-10	4.06259e-07	-2.08904e-10	4.55876e-11	-1.15893e-10	-3.63042e-13	4.04228e-07	1.62748e-11	-0.000286702	-8.98113e-07	-0.000516798	4.02614e-05
2022-03-15 14:19:22	16577174	-1.80094e-10	-1.8705e-10	3.9533e-07	-2.00551e-10	3.92681e-11	-1.16701e-10	-3.741e-13	3.93353e-07	1.40187e-11	-0.000296682	-9.51053e-07	-0.000509849	3.5639e-05
2022-03-15 14:19:37	16592326	2.57032e-11	-1.84623e-10	4.00437e-07	-1.20045e-10	1.31049e-10	1.66557e-11	-3.69246e-13	3.98435e-07	4.67845e-11	4.18028e-05	-9.26741e-07	-0.000301291	0.000117421
2022-03-15 14:19:55	16610730	5.88975e-09	-1.80866e-10	3.9327e-07	9.63736e-11	1.57249e-10	3.81656e-09	-3.61732e-13	3.91304e-07	5.61379e-11	0.00975344	-9.24428e-07	0.000246289	0.000143464
2022-03-15 14:20:08	16623672	8.50396e-09	-1.7419e-10	3.62184e-07	1.53176e-10	1.57994e-10	5.51057e-09	-3.4838e-13	3.60373e-07	5.64039e-11	0.0152913	-9.6672e-07	0.000425048	0.000156515
2022-03-15 14:20:22	16637656	1.07028e-08	-1.70279e-10	3.66395e-07	2.01863e-10	1.9105e-10	6.93541e-09	-3.40558e-13	3.64563e-07	6.82049e-11	0.0190239	-9.34154e-07	0.000553712	0.000187087
2022-03-15 14:20:35	16650069	1.16771e-08	-1.7504e-10	3.68276e-07	2.32188e-10	1.74794e-10	7.56676e-09	-3.5008e-13	3.66435e-07	6.24015e-11	0.0206497	-9.55368e-07	0.000633641	0.000170294
2022-03-15 14:20:47	16662481	1.23329e-08	-1.71907e-10	3.52241e-07	2.32038e-10	1.69773e-10	7.99172e-09	-3.43814e-13	3.5048e-07	6.0609e-11	0.0228022	-9.80981e-07	0.000662058	0.000172931
2022-03-15 14:20:59	16674894	1.17046e-08	-1.85411e-10	3.35937e-07	2.2762e-10	1.40694e-10	7.58458e-09	-3.70822e-13	3.34257e-07	5.02278e-11	0.0226908	-1.10939e-06	0.000680972	0.000150267
2022-03-15 14:21:12	16687305	1.16629e-08	-1.69214e-10	3.32532e-07	2.27802e-10	1.52235e-10	7.55756e-09	-3.38428e-13	3.30869e-07	5.43479e-11	0.0228415	-1.02284e-06	0.000688495	0.000164258
2022-03-15 14:21:24	16699719	1.18994e-08	-1.89998e-10	3.31905e-07	2.14773e-10	1.38644e-10	7.71081e-09	-3.79996e-13	3.30245e-07	4.94959e-11	0.0233487	-1.15065e-06	0.000650344	0.000149876
2022-03-15 14:21:37	16712131	1.19122e-08	-1.92783e-10	3.30383e-07	2.12817e-10	1.37415e-10	7.71911e-09	-3.85566e-13	3.28731e-07	4.90572e-11	0.0234815	-1.17289e-06	0.000647389	0.000149232
2022-03-15 14:21:49	16724544	1.13586e-08	-1.82145e-10	3.3522e-07	1.84254e-10	1.31649e-10	7.36037e-09	-3.6429e-13	3.33544e-07	4.69987e-11	0.0220672	-1.09218e-06	0.000552413	0.000140907
2022-03-15 14:22:02	16737466	8.54072e-09	-1.82647e-10	3.84491e-07	7.92918e-11	1.12069e-10	5.53439e-09	-3.65294e-13	3.82569e-07	4.00086e-11	0.0144664	-9.54846e-07	0.000207262	0.000104579
2022-03-15 14:22:15	16750409	4.50027e-09	-1.85483e-10	3.17483e-07	-3.46041e-11	1.04605e-10	2.91617e-09	-3.70966e-13	3.15896e-07	3.7344e-11	0.00923145	-1.17433e-06	-0.000109543	0.000118216
2022-03-15 14:22:28	16763350	2.74696e-09	-1.84295e-10	3.15243e-07	-7.40673e-11	9.21657e-11	1.78003e-09	-3.6859e-13	3.13667e-07	3.29032e-11	0.00567491	-1.1751e-06	-0.000236134	0.000104898
2022-03-15 14:22:41	16776294	1.71982e-09	-1.77876e-10	3.17393e-07	-1.26323e-10	8.90786e-11	1.11444e-09	-3.55752e-13	3.15806e-07	3.18011e-11	0.00352889	-1.12649e-06	-0.000400002	0.000100698
2022-03-15 14:22:54	16789236	1.11246e-09	-1.83026e-10	3.32174e-07	-1.49586e-10	6.57899e-11	7.20874e-10	-3.66052e-13	3.30513e-07	2.3487e-11	0.00218108	-1.10753e-06	-0.000452587	7.10622e-05
2022-03-15 14:23:08	16803220	6.6595e-10	-1.91104e-10	3.49374e-07	-1.76622e-10	6.42234e-11	4.31536e-10	-3.82208e-13	3.47627e-07	2.29278e-11	0.00124137	-1.09948e-06	-0.000508079	6.5955e-05
2022-03-15 14:23:23	16818372	3.77367e-10	-1.92588e-10	3.60841e-07	-2.02508e-10	7.15407e-11	2.44534e-10	-3.85176e-13	3.59037e-07	2.554e-11	0.000681083	-1.0728e-06	-0.000564031	7.11349e-05
2022-03-15 14:23:38	16833526	2.27243e-10	-1.9181e-10	3.66216e-07	-1.86673e-10	5.1907e-11	1.47253e-10	-3.8362e-13	3.64385e-07	1.85308e-11	0.000404115	-1.05279e-06	-0.000512296	5.0855e-05
2022-03-15 14:23:53	16848680	1.17443e-10	-1.92445e-10	2.64091e-07	-2.001e-10	9.11057e-11	7.61031e-11	-3.8489e-13	2.62771e-07	3.25247e-11	0.000289618	-1.46474e-06	-0.000761501	0.000123776
2022-03-15 14:24:08	16863832	4.55906e-11	-1.78787e-10	1.44139e-07	-1.91285e-10	1.20115e-10	2.95427e-11	-3.57574e-13	1.43418e-07	4.28811e-11	0.00020599	-2.49322e-06	-0.00133376	0.000298993
2022-03-15 14:24:23	16878984	2.03174e-12	-1.83783e-10	7.69519e-08	-2.04776e-10	1.20054e-10	1.31657e-12	-3.67566e-13	7.65671e-08	4.28593e-11	1.71949e-05	-4.80057e-06	-0.00267446	0.000559761
2022-03-15 14:24:39	16894136	-2.05217e-11	-1.84326e-10	4.09826e-08	-1.97401e-10	1.28285e-10	-1.32981e-11	-3.68652e-13	4.07777e-08	4.57977e-11	-0.000326111	-9.04053e-06	-0.00484091	0.00112311
2022-03-15 14:24:54	16909800	-4.69989e-11	-1.82954e-10	2.35783e-08	-2.07506e-10	1.22058e-10	-3.04553e-11	-3.65908e-13	2.34604e-08	4.35747e-11	-0.00129816	-1.55968e-05	-0.00884494	0.00185737
2022-03-15 14:25:10	16925200	-7.15733e-11	-1.80834e-10	1.48343e-08	-2.04464e-10	1.22741e-10	-4.63795e-11	-3.61668e-13	1.47601e-08	4.38185e-11	-0.00314222	-2.4503e-05	-0.0138525	0.00296871
2022-03-15 14:25:25	16940604	-8.64406e-11	-1.82729e-10	1.04464e-08	-2.14483e-10	1.00121e-10	-5.60135e-11	-3.65458e-13	1.03942e-08	3.57432e-11	-0.00538894	-3.51599e-05	-0.0206349	0.00343877
2022-03-15 14:25:41	16956006	-8.78058e-11	-1.8835e-10	8.1991e-09	-2.12763e-10	1.16015e-10	-5.68982e-11	-3.767e-13	8.1581e-09	4.14174e-11	-0.00697443	-4.61749e-05	-0.02608	0.00507684
2022-03-15 14:25:56	16971408	-9.80075e-11	-1.77036e-10	6.96265e-09	-1.99573e-10	9.83929e-11	-6.35089e-11	-3.54072e-13	6.92784e-09	3.51263e-11	-0.0091672	-5.11086e-05	-0.0288074	0.00507031
2022-03-15 14:26:12	16987852	-1.1081e-10	-1.86599e-10	6.34007e-09	-2.15472e-10	1.0763e-10	-7.18049e-11	-3.73198e-13	6.30837e-09	3.84239e-11	-0.0113825	-5.91592e-05	-0.0341565	0.00609094
2022-03-15 14:26:28	17003786	-1.17776e-10	-1.80487e-10	5.98789e-09	-2.08248e-10	9.62429e-11	-7.63188e-11	-3.60974e-13	5.95795e-09	3.43587e-11	-0.0128096	-6.05869e-05	-0.034953	0.00576687
2022-03-15 14:26:44	17019720	-1.22786e-10	-1.8195e-10	5.81827e-09	-2.15945e-10	9.44536e-11	-7.95653e-11	-3.639e-13	5.78918e-09	3.37199e-11	-0.0137438	-6.28587e-05	-0.0373015	0.00582465
2022-03-15 14:27:00	17035652	-1.19002e-10	-1.77426e-10	5.71498e-09	-2.19353e-10	9.01079e-11	-7.71133e-11	-3.54852e-13	5.68641e-09	3.21685e-11	-0.013561	-6.24036e-05	-0.038575	0.00565709
2022-03-15 14:27:16	17051584	-1.31536e-10	-1.8364e-10	5.66308e-09	-2.18127e-10	8.64064e-11	-8.52353e-11	-3.6728e-13	5.63476e-09	3.08471e-11	-0.0151267	-6.51811e-05	-0.0387109	0.00547442
2022-03-15 14:27:32	17067516	-1.38158e-10	-1.85912e-10	5.5571e-09	-2.19385e-10	8.06479e-11	-8.95264e-11	-3.71824e-13	5.52931e-09	2.87913e-11	-0.0161912	-6.72459e-05	-0.0396767	0.00520703
2022-03-15 14:27:48	17083452	-1.34396e-10	-1.83569e-10	5.48511e-09	-2.0699e-10	6.76788e-11	-8.70886e-11	-3.67138e-13	5.45768e-09	2.41613e-11	-0.0159571	-6.72699e-05	-0.0379263	0.00442703
2022-03-15 14:28:04	17099384	-1.49381e-10	-1.84694e-10	5.42521e-09	-2.368e-10	7.15714e-11	-9.67989e-11	-3.69388e-13	5.39808e-09	2.5551e-11	-0.0179321	-6.84295e-05	-0.0438674	0.00473334
2022-03-15 14:28:20	17115316	-1.5295e-10	-1.91984e-10	5.36748e-09	-2.2877e-10	6.61969e-11	-9.91116e-11	-3.83968e-13	5.34064e-09	2.36323e-11	-0.018558	-7.18955e-05	-0.0428357	0.00442499
2022-03-15 14:28:36	17131248	-1.39986e-10	-1.91063e-10	5.32433e-09	-2.17214e-10	7.86743e-11	-9.07109e-11	-3.82126e-13	5.29771e-09	2.80867e-11	-0.0171227	-7.21304e-05	-0.0410015	0.00530167
2022-03-15 14:28:52	17147182	-1.58089e-10	-1.80507e-10	5.28627e-09	-2.20503e-10	8.22907e-11	-1.02442e-10	-3.61014e-13	5.25984e-09	2.93778e-11	-0.0194762	-6.86359e-05	-0.041922	0.0055853
2022-03-15 14:29:08	17163116	-1.53628e-10	-1.90714e-10	5.2433e-09	-2.18192e-10	8.36343e-11	-9.95509e-11	-3.81428e-13	5.21708e-09	2.98574e-11	-0.0190817	-7.31113e-05	-0.0418226	0.00572301
2022-03-15 14:29:24	17179048	-1.55681e-10	-1.9138e-10	5.21478e-09	-2.24008e-10	6.55519e-11	-1.00881e-10	-3.8276e-13	5.18871e-09	2.3402e-11	-0.0194425	-7.37679e-05	-0.0431722	0.00451019
2022-03-15 14:29:39	17194980	-1.52735e-10	-1.83752e-10	5.2028e-09	-2.22503e-10	6.89841e-11	-9.89723e-11	-3.67504e-13	5.17679e-09	2.46273e-11	-0.0191185	-7.09908e-05	-0.0429809	0.00475726
2022-03-15 14:29:55	17210914	-1.55283e-10	-1.89373e-10	5.2084e-09	-2.17429e-10	5.89406e-11	-1.00623e-10	-3.78746e-13	5.18236e-09	2.10418e-11	-0.0194165	-7.30837e-05	-0.0419556	0.00406027
2022-03-15 14:30:11	17226848	-1.58046e-10	-1.98393e-10	5.19872e-09	-2.25405e-10	8.63914e-11	-1.02414e-10	-3.96786e-13	5.17273e-09	3.08417e-11	-0.0197988	-7.67073e-05	-0.0435757	0.00596237
2022-03-15 14:30:27	17242780	-1.64947e-10	-1.98536e-10	5.19488e-09	-2.19697e-10	6.11597e-11	-1.06886e-10	-3.97072e-13	5.16891e-09	2.1834e-11	-0.0206786	-7.68194e-05	-0.0425036	0.00422411
2022-03-15 14:30:43	17258714	-1.74074e-10	-1.88708e-10	5.18874e-09	-2.23298e-10	5.86872e-11	-1.128e-10	-3.77416e-13	5.1628e-09	2.09513e-11	-0.0218486	-7.3103e-05	-0.0432514	0.00405814
2022-03-15 14:30:59	17274646	-1.65829e-10	-1.94769e-10	5.15492e-09	-2.29737e-10	4.52497e-11	-1.07457e-10	-3.89538e-13	5.12915e-09	1.61541e-11	-0.0209503	-7.5946e-05	-0.0447905	0.00314948
2022-03-15 14:31:15	17290580	-1.77492e-10	-1.97881e-10	5.13867e-09	-2.27856e-10	4.67547e-11	-1.15015e-10	-3.95762e-13	5.11298e-09	1.66914e-11	-0.0224947	-7.74034e-05	-0.0445643	0.00326452
2022-03-15 14:31:31	17306510	-1.65162e-10	-1.9051e-10	5.13467e-09	-2.31672e-10	6.01615e-11	-1.07025e-10	-3.8102e-13	5.109e-09	2.14777e-11	-0.0209483	-7.45782e-05	-0.0453459	0.00420389
2022-03-15 14:31:47	17322444	-1.68516e-10	-1.8149e-10	5.12053e-09	-2.2949e-10	5.60841e-11	-1.09198e-10	-3.6298e-13	5.09493e-09	2.0022e-11	-0.0214328	-7.12434e-05	-0.0450428	0.0039298
2022-03-15 14:32:03	17338376	-1.73827e-10	-1.9053e-10	5.10898e-09	-2.31683e-10	4.78297e-11	-1.1264e-10	-3.8106e-13	5.08344e-09	1.70752e-11	-0.0221582	-7.49611e-05	-0.0455761	0.00335899
2022-03-15 14:32:19	17354312	-1.76858e-10	-1.97789e-10	5.09875e-09	-2.32317e-10	4.74919e-11	-1.14604e-10	-3.95578e-13	5.07326e-09	1.69546e-11	-0.0225898	-7.79732e-05	-0.0457925	0.00334196
2022-03-15 14:32:35	17370244	-1.77654e-10	-1.99581e-10	5.1581e-09	-2.30608e-10	5.95088e-11	-1.1512e-10	-3.99162e-13	5.13231e-09	2.12446e-11	-0.0224304	-7.77743e-05	-0.0449326	0.00413939
2022-03-15 14:32:51	17386176	-1.79513e-10	-1.99631e-10	5.14031e-09	-2.30812e-10	7.33143e-11	-1.16324e-10	-3.99262e-13	5.11461e-09	2.61732e-11	-0.0227436	-7.80631e-05	-0.045128	0.00511734
2022-03-15 14:33:07	17402108	-1.84458e-10	-1.95035e-10	5.12805e-09	-2.29555e-10	4.91504e-11	-1.19529e-10	-3.9007e-13	5.10241e-09	1.75467e-11	-0.0234259	-7.64482e-05	-0.0449895	0.0034389
2022-03-15 14:33:23	17418042	-1.83233e-10	-1.97635e-10	5.08305e-09	-2.27802e-10	4.92502e-11	-1.18735e-10	-3.9527e-13	5.05763e-09	1.75823e-11	-0.0234764	-7.81531e-05	-0.0450412	0.00347639
2022-03-15 14:33:38	17433976	-2.00659e-10	-2.09563e-10	5.04495e-09	-2.25136e-10	5.57156e-11	-1.30027e-10	-4.19126e-13	5.01973e-09	1.98905e-11	-0.0259032	-8.34958e-05	-0.0448503	0.00396246
2022-03-15 14:33:54	17449908	-1.78578e-10	-1.94881e-10	5.03918e-09	-2.26695e-10	3.49451e-11	-1.15719e-10	-3.89762e-13	5.01398e-09	1.24754e-11	-0.0230792	-7.7735e-05	-0.0452125	0.00248812
2022-03-15 14:34:10	17465840	-1.92424e-10	-1.9743e-10	5.01308e-09	-2.43379e-10	4.84516e-11	-1.24691e-10	-3.9486e-13	4.98801e-09	1.72972e-11	-0.0249981	-7.91618e-05	-0.0487928	0.00346776
2022-03-15 14:34:26	17481774	-1.90618e-10	-2.03308e-10	5.00313e-09	-2.33339e-10	5.59152e-11	-1.2352e-10	-4.06616e-13	4.97811e-09	1.99617e-11	-0.0248127	-8.16807e-05	-0.046873	0.0040099
2022-03-15 14:34:42	17497704	-1.77095e-10	-1.96428e-10	4.95938e-09	-2.30253e-10	4.25776e-11	-1.14758e-10	-3.92856e-13	4.93458e-09	1.52002e-11	-0.0232558	-7.96128e-05	-0.0466611	0.00308034
2022-03-15 14:34:58	17513640	-1.98541e-10	-1.93827e-10	4.94487e-09	-2.29092e-10	5.84338e-11	-1.28655e-10	-3.87654e-13	4.92015e-09	2.08609e-11	-0.0261485	-7.87891e-05	-0.046562	0.00423989
2022-03-15 14:35:14	17529572	-1.87823e-10	-2.07935e-10	4.93415e-09	-2.36101e-10	5.47865e-11	-1.21709e-10	-4.1587e-13	4.90948e-09	1.95588e-11	-0.0247907	-8.47076e-05	-0.0480908	0.00398388
2022-03-15 14:35:30	17545506	-1.94101e-10	-1.95895e-10	4.92074e-09	-2.29146e-10	4.52421e-11	-1.25777e-10	-3.9179e-13	4.89614e-09	1.61514e-11	-0.0256891	-8.00202e-05	-0.0468014	0.00329881
2022-03-15 14:35:46	17561440	-1.96047e-10	-1.88052e-10	4.92394e-09	-2.34844e-10	4.55185e-11	-1.27038e-10	-3.76104e-13	4.89932e-09	1.62501e-11	-0.0259298	-7.67666e-05	-0.047934	0.00331681
2022-03-15 14:36:02	17577372	-1.88425e-10	-1.98372e-10	4.88851e-09	-2.30855e-10	5.40494e-11	-1.22099e-10	-3.96744e-13	4.86407e-09	1.92956e-11	-0.0251023	-8.15663e-05	-0.0474613	0.00396698
2022-03-15 14:36:18	17593306	-1.94596e-10	-1.98915e-10	4.8752e-09	-2.41315e-10	4.74228e-11	-1.26098e-10	-3.9783e-13	4.85082e-09	1.69299e-11	-0.0259952	-8.20129e-05	-0.0497472	0.00349012
2022-03-15 14:36:34	17609240	-1.95015e-10	-1.96437e-10	4.86302e-09	-2.33672e-10	5.64834e-11	-1.2637e-10	-3.92874e-13	4.8387e-09	2.01646e-11	-0.0261164	-8.1194e-05	-0.0482923	0.00416735
2022-03-15 14:36:50	17625172	-1.98605e-10	-1.9267e-10	4.86915e-09	-2.47948e-10	9.02071e-11	-1.28696e-10	-3.8534e-13	4.8448e-09	3.22039e-11	-0.0265637	-7.95368e-05	-0.0511781	0.00664711
2022-03-15 14:37:06	17641104	-2.11796e-10	-1.90458e-10	4.96076e-09	-2.37359e-10	4.78681e-11	-1.37244e-10	-3.80916e-13	4.93596e-09	1.70889e-11	-0.0278049	-7.71717e-05	-0.0480877	0.00346213
2022-03-15 14:37:22	17657036	-1.8677e-10	-1.94318e-10	4.55623e-09	-2.42229e-10	3.94064e-11	-1.21027e-10	-3.88636e-13	4.53345e-09	1.40681e-11	-0.0266964	-8.57263e-05	-0.0534315	0.00310317
2022-03-15 14:37:37	17672972	-1.95165e-10	-2.12747e-10	4.55422e-09	-2.51571e-10	4.54954e-11	-1.26467e-10	-4.25494e-13	4.53145e-09	1.62419e-11	-0.0279087	-9.3898e-05	-0.0555167	0.00358425
2022-03-15 14:37:53	17688904	-2.00164e-10	-2.04935e-10	4.77433e-09	-2.4468e-10	5.03713e-11	-1.29706e-10	-4.0987e-13	4.75046e-09	1.79826e-11	-0.0273039	-8.62801e-05	-0.0515066	0.00378544
2022-03-15 14:38:09	17704836	-2.08463e-10	-2.10925e-10	4.95168e-09	-2.31855e-10	4.87665e-11	-1.35084e-10	-4.2185e-13	4.92692e-09	1.74096e-11	-0.0274175	-8.56214e-05	-0.0470588	0.00353357
2022-03-15 14:38:25	17720768	-2.07216e-10	-1.99868e-10	5.25619e-09	-2.36435e-10	5.80038e-11	-1.34276e-10	-3.99736e-13	5.22991e-09	2.07074e-11	-0.0256746	-7.64327e-05	-0.0452082	0.00395941
2022-03-15 14:38:41	17736702	-1.88275e-10	-2.0511e-10	7.56793e-08	-2.35854e-10	4.98722e-11	-1.22002e-10	-4.1022e-13	7.53009e-08	1.78044e-11	-0.0016202	-5.44774e-06	-0.00313215	0.000236443
2022-03-15 14:38:58	17753146	-1.99476e-10	-2.04823e-10	2.07653e-07	-2.3021e-10	4.01972e-11	-1.2926e-10	-4.09646e-13	2.06615e-07	1.43504e-11	-0.000625611	-1.98266e-06	-0.0011142	6.94549e-05
2022-03-15 14:39:13	17768808	-1.76256e-10	-2.14139e-10	2.93474e-07	-2.40692e-10	3.21731e-11	-1.14214e-10	-4.28278e-13	2.92007e-07	1.14858e-11	-0.000391135	-1.46667e-06	-0.000824269	3.9334e-05
2022-03-15 14:39:28	17783960	-2.09807e-10	-2.11867e-10	3.37638e-07	-2.33457e-10	1.67546e-11	-1.35955e-10	-4.23734e-13	3.3595e-07	5.98139e-12	-0.000404688	-1.2613e-06	-0.000694916	1.78044e-05
2022-03-15 14:39:44	17799114	-2.01067e-10	-2.23047e-10	3.46866e-07	-2.30576e-10	8.13921e-13	-1.30291e-10	-4.46094e-13	3.45132e-07	2.9057e-13	-0.000377512	-1.29253e-06	-0.000668081	8.4191e-07
2022-03-15 14:39:59	17814266	-2.12957e-10	-2.12399e-10	3.68813e-07	-2.34564e-10	1.17328e-11	-1.37996e-10	-4.24798e-13	3.66969e-07	4.18861e-12	-0.000376043	-1.15759e-06	-0.000639193	1.14141e-05
2022-03-15 14:40:14	17829420	-2.10613e-10	-2.16371e-10	3.80997e-07	-2.28189e-10	6.48838e-12	-1.36477e-10	-4.32742e-13	3.79092e-07	2.31635e-12	-0.000360011	-1.14152e-06	-0.000601936	6.11026e-06
2022-03-15 14:40:29	17844572	-2.10914e-10	-2.24101e-10	3.88074e-07	-2.34435e-10	1.77067e-11	-1.36672e-10	-4.48202e-13	3.86134e-07	6.32129e-12	-0.000353951	-1.16074e-06	-0.000607134	1.63707e-05
2022-03-15 14:40:44	17859724	1.90595e-09	-2.08345e-10	3.78847e-07	-3.62596e-11	1.03453e-10	1.23506e-09	-4.1669e-13	3.76953e-07	3.69327e-11	0.00327642	-1.10542e-06	-9.61914e-05	9.79771e-05
2022-03-15 14:41:03	17878126	7.46026e-09	-2.01843e-10	3.37101e-07	7.83566e-11	1.25398e-10	4.83425e-09	-4.03686e-13	3.35415e-07	4.47671e-11	0.0144127	-1.20354e-06	0.000233611	0.000133468
2022-03-15 14:41:16	17891068	9.22859e-09	-2.08795e-10	3.41222e-07	1.43329e-10	1.19255e-10	5.98013e-09	-4.1759e-13	3.39516e-07	4.2574e-11	0.0176137	-1.22996e-06	0.000422157	0.000125396
2022-03-15 14:41:30	17905052	1.05207e-08	-1.96837e-10	3.41938e-07	1.7387e-10	1.3419e-10	6.81741e-09	-3.93674e-13	3.40228e-07	4.79058e-11	0.0200378	-1.15709e-06	0.000511039	0.000140805
2022-03-15 14:41:42	17917464	1.13983e-08	-2.00349e-10	3.43283e-07	1.90597e-10	1.52956e-10	7.3861e-09	-4.00698e-13	3.41567e-07	5.46053e-11	0.0216242	-1.17312e-06	0.000558008	0.000159867
2022-03-15 14:41:54	17929876	1.16798e-08	-2.00482e-10	3.39341e-07	2.06808e-10	1.42575e-10	7.56851e-09	-4.00964e-13	3.37644e-07	5.08993e-11	0.0224156	-1.18753e-06	0.000612503	0.000150748
2022-03-15 14:42:07	17942288	1.1757e-08	-2.0642e-10	3.36026e-07	1.93252e-10	1.1762e-10	7.61854e-09	-4.1284e-13	3.34346e-07	4.19903e-11	0.0227864	-1.23477e-06	0.000578	0.00012559
2022-03-15 14:42:19	17954700	1.18779e-08	-2.12604e-10	3.32801e-07	1.97907e-10	1.12536e-10	7.69688e-09	-4.25208e-13	3.31137e-07	4.01754e-11	0.0232438	-1.28408e-06	0.000597659	0.000121325
2022-03-15 14:42:32	17967114	1.19082e-08	-2.07392e-10	3.3298e-07	2.03056e-10	1.28561e-10	7.71651e-09	-4.14784e-13	3.31315e-07	4.58963e-11	0.0232906	-1.25193e-06	0.000612879	0.000138528
2022-03-15 14:42:44	17979524	1.18343e-08	-2.05815e-10	3.33787e-07	1.85211e-10	1.21236e-10	7.66863e-09	-4.1163e-13	3.32118e-07	4.32813e-11	0.0230901	-1.23941e-06	0.000557666	0.000130319
2022-03-15 14:42:56	17991940	9.30142e-09	-2.12327e-10	3.4167e-07	1.03038e-10	9.80086e-11	6.02732e-09	-4.24654e-13	3.39962e-07	3.49891e-11	0.0177294	-1.24912e-06	0.000303087	0.000102921
2022-03-15 14:43:09	18004860	5.71034e-09	-2.09307e-10	3.25903e-07	-4.61174e-11	7.925e-11	3.7003e-09	-4.18614e-13	3.24273e-07	2.82922e-11	0.011411	-1.29093e-06	-0.000142218	8.72481e-05
2022-03-15 14:43:22	18017804	3.10296e-09	-2.13525e-10	3.17213e-07	-1.04661e-10	1.07423e-10	2.01072e-09	-4.2705e-13	3.15627e-07	3.835e-11	0.00637055	-1.35302e-06	-0.000331597	0.000121504
2022-03-15 14:43:35	18030746	1.8855e-09	-2.0771e-10	3.17303e-07	-1.5352e-10	7.37679e-11	1.2218e-09	-4.1542e-13	3.15716e-07	2.63351e-11	0.00386994	-1.3158e-06	-0.000486259	8.34139e-05
2022-03-15 14:43:48	18043688	1.17642e-09	-2.15531e-10	3.27337e-07	-1.77256e-10	7.01436e-11	7.6232e-10	-4.31062e-13	3.257e-07	2.50413e-11	0.00234056	-1.32349e-06	-0.00054423	7.68844e-05
2022-03-15 14:44:02	18057672	7.11831e-10	-2.18583e-10	3.46687e-07	-1.8119e-10	5.6184e-11	4.61266e-10	-4.37166e-13	3.44954e-07	2.00577e-11	0.00133718	-1.26732e-06	-0.000525259	5.81461e-05
2022-03-15 14:44:17	18072824	4.09477e-10	-2.04065e-10	3.58601e-07	-2.1358e-10	4.44972e-11	2.65341e-10	-4.0813e-13	3.56808e-07	1.58855e-11	0.000743652	-1.14384e-06	-0.000598585	4.45211e-05
2022-03-15 14:44:32	18087976	2.41283e-10	-2.15337e-10	3.65768e-07	-2.07979e-10	4.82059e-11	1.56351e-10	-4.30674e-13	3.63939e-07	1.72095e-11	0.000429609	-1.18337e-06	-0.000571466	4.72868e-05
2022-03-15 14:44:48	18103128	1.11692e-10	-2.13781e-10	3.04583e-07	-2.14419e-10	8.087e-11	7.23764e-11	-4.27562e-13	3.0306e-07	2.88706e-11	0.000238819	-1.41082e-06	-0.000707513	9.52636e-05
2022-03-15 14:45:03	18118280	4.97079e-11	-2.08723e-10	1.71462e-07	-2.15257e-10	1.03537e-10	3.22107e-11	-4.17446e-13	1.70605e-07	3.69627e-11	0.000188803	-2.44686e-06	-0.00126173	0.000216657
2022-03-15 14:45:18	18133434	4.85899e-12	-1.99601e-10	9.03892e-08	-2.16999e-10	8.00714e-11	3.14863e-12	-3.99202e-13	8.99373e-08	2.85855e-11	3.50091e-05	-4.43867e-06	-0.00241278	0.000317838
2022-03-15 14:45:33	18148586	-4.06456e-11	-2.00092e-10	4.71929e-08	-2.19622e-10	1.07116e-10	-2.63383e-11	-4.00184e-13	4.69569e-08	3.82404e-11	-0.000560904	-8.52236e-06	-0.00467709	0.000814372
2022-03-15 14:45:49	18164248	-6.87998e-11	-2.0733e-10	2.65848e-08	-2.26265e-10	1.10748e-10	-4.45823e-11	-4.1466e-13	2.64519e-08	3.9537e-11	-0.00168541	-1.5676e-05	-0.00855384	0.00149468
2022-03-15 14:46:04	18179652	-8.12591e-11	-2.00523e-10	1.63029e-08	-2.34521e-10	1.01211e-10	-5.26559e-11	-4.01046e-13	1.62214e-08	3.61323e-11	-0.00324608	-2.47233e-05	-0.0144575	0.00222745
2022-03-15 14:46:20	18195054	-9.26003e-11	-1.97758e-10	1.11524e-08	-2.3278e-10	9.41543e-11	-6.0005e-11	-3.95516e-13	1.10966e-08	3.36131e-11	-0.00540749	-3.56429e-05	-0.0209775	0.00302912
2022-03-15 14:46:35	18210456	-1.02501e-10	-2.07095e-10	8.51983e-09	-2.26899e-10	7.86514e-11	-6.64206e-11	-4.1419e-13	8.47723e-09	2.80785e-11	-0.00783518	-4.88591e-05	-0.0267657	0.00331223
2022-03-15 14:46:50	18225860	-1.15755e-10	-1.94881e-10	7.10707e-09	-2.21729e-10	9.7525e-11	-7.50092e-11	-3.89762e-13	7.07153e-09	3.48164e-11	-0.0106072	-5.5117e-05	-0.0313551	0.00492346
2022-03-15 14:47:07	18242302	-1.29935e-10	-1.84643e-10	6.42404e-09	-2.33188e-10	8.48321e-11	-8.41979e-11	-3.69286e-13	6.39192e-09	3.02851e-11	-0.0131725	-5.77739e-05	-0.0364817	0.00473802
2022-03-15 14:47:23	18258236	-1.3216e-10	-2.0259e-10	6.0723e-09	-2.24803e-10	8.183e-11	-8.56397e-11	-4.0518e-13	6.04194e-09	2.92133e-11	-0.0141742	-6.70613e-05	-0.0372071	0.00483509
2022-03-15 14:47:39	18274168	-1.25097e-10	-1.88001e-10	5.84001e-09	-2.2834e-10	8.97157e-11	-8.10629e-11	-3.76002e-13	5.81081e-09	3.20285e-11	-0.0139504	-6.47073e-05	-0.0392957	0.00551188
2022-03-15 14:47:55	18290102	-1.34966e-10	-1.88933e-10	5.72041e-09	-2.31371e-10	8.11621e-11	-8.7458e-11	-3.77866e-13	5.69181e-09	2.89749e-11	-0.0153656	-6.63877e-05	-0.0406498	0.00509063
2022-03-15 14:48:11	18306036	-1.46619e-10	-1.96437e-10	5.59937e-09	-2.17622e-10	7.323e-11	-9.50091e-11	-3.92874e-13	5.57137e-09	2.61431e-11	-0.0170531	-7.05165e-05	-0.0390607	0.0046924
2022-03-15 14:48:26	18321968	-1.44974e-10	-1.90049e-10	5.54155e-09	-2.40057e-10	7.82057e-11	-9.39432e-11	-3.80098e-13	5.51384e-09	2.79194e-11	-0.0170377	-6.89352e-05	-0.0435372	0.00506352
2022-03-15 14:48:42	18337900	-1.60583e-10	-1.95874e-10	5.47961e-09	-2.22094e-10	6.89458e-11	-1.04058e-10	-3.91748e-13	5.45221e-09	2.46137e-11	-0.0190854	-7.18512e-05	-0.0407347	0.00451443
2022-03-15 14:48:58	18353834	-1.6485e-10	-1.97359e-10	5.41318e-09	-2.26201e-10	7.27771e-11	-1.06823e-10	-3.94718e-13	5.38611e-09	2.59814e-11	-0.019833	-7.32844e-05	-0.0419971	0.00482378
2022-03-15 14:49:14	18369766	-1.58712e-10	-1.92046e-10	5.35469e-09	-2.30866e-10	8.57921e-11	-1.02845e-10	-3.84092e-13	5.32792e-09	3.06278e-11	-0.0193031	-7.20905e-05	-0.0433314	0.00574855
2022-03-15 14:49:30	18385700	-1.55971e-10	-1.97226e-10	5.2945e-09	-2.35682e-10	7.677e-11	-1.01069e-10	-3.94452e-13	5.26803e-09	2.74069e-11	-0.0191854	-7.48766e-05	-0.0447382	0.0052025
2022-03-15 14:49:46	18401632	-1.66377e-10	-1.92721e-10	5.26888e-09	-2.21137e-10	6.53369e-11	-1.07812e-10	-3.85442e-13	5.24254e-09	2.33253e-11	-0.0205649	-7.35221e-05	-0.0421813	0.00444924
2022-03-15 14:50:02	18417566	-1.58734e-10	-1.92189e-10	5.25055e-09	-2.12021e-10	6.63811e-11	-1.0286e-10	-3.84378e-13	5.2243e-09	2.36981e-11	-0.0196887	-7.35751e-05	-0.0405836	0.00453612
2022-03-15 14:50:18	18433500	-1.69333e-10	-1.91063e-10	5.21611e-09	-2.18987e-10	7.35757e-11	-1.09728e-10	-3.82126e-13	5.19003e-09	2.62665e-11	-0.021142	-7.36269e-05	-0.0421938	0.00506096
2022-03-15 14:50:34	18449432	-1.75547e-10	-1.89516e-10	5.1802e-09	-2.3536e-10	6.37858e-11	-1.13754e-10	-3.79032e-13	5.1543e-09	2.27715e-11	-0.0220698	-7.35371e-05	-0.0456629	0.00441797
2022-03-15 14:50:50	18465364	-1.57627e-10	-1.97288e-10	5.15514e-09	-2.29318e-10	4.98952e-11	-1.02142e-10	-3.94576e-13	5.12936e-09	1.78126e-11	-0.0199132	-7.69249e-05	-0.0447069	0.00347267
2022-03-15 14:51:06	18481296	-1.69365e-10	-1.9135e-10	5.13538e-09	-2.24997e-10	6.04533e-11	-1.09749e-10	-3.827e-13	5.1097e-09	2.15818e-11	-0.0214785	-7.48967e-05	-0.0440333	0.0042237
2022-03-15 14:51:22	18497232	-1.76106e-10	-1.91973e-10	5.09838e-09	-2.25265e-10	5.80499e-11	-1.14117e-10	-3.83946e-13	5.07289e-09	2.07238e-11	-0.0224954	-7.56859e-05	-0.0444057	0.00408521
2022-03-15 14:51:38	18513164	-1.72322e-10	-1.98311e-10	5.10129e-09	-2.33618e-10	4.89354e-11	-1.11665e-10	-3.96622e-13	5.07578e-09	1.74699e-11	-0.0219995	-7.81401e-05	-0.046026	0.00344182
2022-03-15 14:51:54	18529096	-1.81008e-10	-1.9137e-10	5.06882e-09	-2.3006e-10	5.56158e-11	-1.17293e-10	-3.8274e-13	5.04348e-09	1.98548e-11	-0.0232564	-7.58881e-05	-0.0456154	0.00393674
2022-03-15 14:52:10	18545032	-1.74074e-10	-1.98577e-10	5.07419e-09	-2.38606e-10	6.17586e-11	-1.128e-10	-3.97154e-13	5.04882e-09	2.20478e-11	-0.0223418	-7.86628e-05	-0.0472598	0.00436693
2022-03-15 14:52:25	18560964	-1.87318e-10	-1.99745e-10	5.07487e-09	-2.22417e-10	5.62454e-11	-1.21382e-10	-3.9949e-13	5.0495e-09	2.00796e-11	-0.0240385	-7.91148e-05	-0.0440474	0.00397656
2022-03-15 14:52:41	18576896	-1.80578e-10	-1.88503e-10	5.06273e-09	-2.33779e-10	6.07527e-11	-1.17015e-10	-3.77006e-13	5.03742e-09	2.16887e-11	-0.0232291	-7.48411e-05	-0.0464085	0.00430552
2022-03-15 14:52:57	18592828	-1.8592e-10	-1.9226e-10	5.03371e-09	-2.10667e-10	5.22679e-11	-1.20476e-10	-3.8452e-13	5.00854e-09	1.86596e-11	-0.0240541	-7.67728e-05	-0.0420615	0.00372556
2022-03-15 14:53:13	18608762	-1.56218e-10	-1.87131e-10	5.02427e-09	-2.15257e-10	6.40545e-11	-1.01229e-10	-3.74262e-13	4.99915e-09	2.28675e-11	-0.0202493	-7.48651e-05	-0.0430587	0.00457427
2022-03-15 14:53:29	18624696	-1.76665e-10	-1.84705e-10	5.02947e-09	-2.26082e-10	6.57899e-11	-1.14479e-10	-3.6941e-13	5.00432e-09	2.3487e-11	-0.022876	-7.38182e-05	-0.0451773	0.00469334
2022-03-15 14:53:45	18640628	-1.71999e-10	-1.80875e-10	5.00848e-09	-2.16999e-10	6.75559e-11	-1.11455e-10	-3.6175e-13	4.98344e-09	2.41175e-11	-0.0223652	-7.25905e-05	-0.043544	0.00483952
2022-03-15 14:54:01	18656562	-1.65775e-10	-1.83834e-10	5.01652e-09	-2.1315e-10	5.80499e-11	-1.07422e-10	-3.67668e-13	4.99144e-09	2.07238e-11	-0.0215213	-7.36597e-05	-0.0427031	0.00415187
2022-03-15 14:54:17	18672496	-1.75095e-10	-1.89322e-10	4.99829e-09	-2.23492e-10	5.62915e-11	-1.13462e-10	-3.78644e-13	4.9733e-09	2.00961e-11	-0.0228141	-7.61354e-05	-0.0449384	0.00404079
2022-03-15 14:54:33	18688428	-1.66979e-10	-1.78562e-10	4.98548e-09	-2.21406e-10	5.47404e-11	-1.08202e-10	-3.57124e-13	4.96055e-09	1.95423e-11	-0.0218126	-7.19928e-05	-0.0446333	0.00393955
2022-03-15 14:54:49	18704360	-1.75955e-10	-1.76586e-10	5.0037e-09	-2.24244e-10	4.68008e-11	-1.14019e-10	-3.53172e-13	4.97868e-09	1.67079e-11	-0.0229014	-7.09369e-05	-0.0450408	0.00335589
2022-03-15 14:55:05	18720294	-1.64592e-10	-1.7334e-10	5.00026e-09	-2.06173e-10	5.12544e-11	-1.06656e-10	-3.4668e-13	4.97526e-09	1.82978e-11	-0.0214372	-6.96808e-05	-0.0414397	0.00367776
2022-03-15 14:55:21	18736226	-1.76718e-10	-1.96755e-10	4.95928e-09	-2.22685e-10	3.75481e-11	-1.14513e-10	-3.9351e-13	4.93448e-09	1.34047e-11	-0.0232067	-7.97469e-05	-0.0451283	0.00271653
2022-03-15 14:55:37	18752160	-1.72795e-10	-1.94471e-10	4.97022e-09	-2.25631e-10	6.34633e-11	-1.11971e-10	-3.88942e-13	4.94537e-09	2.26564e-11	-0.0226416	-7.86477e-05	-0.0456247	0.00458134
2022-03-15 14:55:53	18768090	-1.71128e-10	-1.84285e-10	4.96863e-09	-2.21514e-10	5.08551e-11	-1.10891e-10	-3.6857e-13	4.94379e-09	1.81553e-11	-0.0224304	-7.45522e-05	-0.0448065	0.00367234
2022-03-15 14:56:09	18784024	-1.85609e-10	-1.9226e-10	4.94353e-09	-2.20707e-10	5.13081e-11	-1.20275e-10	-3.8452e-13	4.91881e-09	1.8317e-11	-0.024452	-7.81733e-05	-0.04487	0.00372386
2022-03-15 14:56:24	18799956	-1.6413e-10	-1.89414e-10	4.96924e-09	-2.25298e-10	4.97416e-11	-1.06356e-10	-3.78828e-13	4.94439e-09	1.77578e-11	-0.0215105	-7.66177e-05	-0.0455664	0.00359149
2022-03-15 14:56:40	18815888	-1.83426e-10	-1.8841e-10	4.93308e-09	-2.11548e-10	5.01102e-11	-1.1886e-10	-3.7682e-13	4.90841e-09	1.78893e-11	-0.0242156	-7.67702e-05	-0.043099	0.00364463
2022-03-15 14:56:56	18831822	-1.79309e-10	-1.8495e-10	4.97388e-09	-2.14343e-10	4.53265e-11	-1.16192e-10	-3.699e-13	4.94901e-09	1.61816e-11	-0.0234779	-7.47422e-05	-0.0433103	0.00326966
2022-03-15 14:57:12	18847756	-1.83029e-10	-1.91953e-10	4.94515e-09	-2.16117e-10	6.0054e-11	-1.18603e-10	-3.83906e-13	4.92042e-09	2.14393e-11	-0.0241042	-7.80229e-05	-0.0439224	0.0043572
2022-03-15 14:57:28	18863688	-1.87329e-10	-1.82739e-10	4.9385e-09	-2.15752e-10	4.64246e-11	-1.21389e-10	-3.65478e-13	4.91381e-09	1.65736e-11	-0.0247037	-7.43778e-05	-0.0439073	0.00337286
2022-03-15 14:57:44	18879620	-1.79126e-10	-1.81808e-10	4.94449e-09	-2.25072e-10	4.14642e-11	-1.16074e-10	-3.63616e-13	4.91977e-09	1.48027e-11	-0.0235933	-7.39092e-05	-0.0457485	0.00300882
2022-03-15 14:58:00	18895554	-1.82405e-10	-1.82155e-10	5.6812e-09	-2.27684e-10	3.8124e-11	-1.18198e-10	-3.6431e-13	5.65279e-09	1.36103e-11	-0.0209097	-6.44478e-05	-0.0402781	0.00240771
2022-03-15 14:58:16	18911486	-1.73268e-10	-1.77763e-10	4.64722e-09	-2.30802e-10	2.71744e-11	-1.12278e-10	-3.55526e-13	4.62398e-09	9.70126e-12	-0.0242816	-7.68874e-05	-0.0499141	0.00209803
2022-03-15 14:58:32	18927420	-1.68054e-10	-1.83896e-10	4.55182e-09	-2.1473e-10	6.30563e-11	-1.08899e-10	-3.67792e-13	4.52906e-09	2.25111e-11	-0.0240445	-8.12071e-05	-0.0474116	0.00497037
2022-03-15 14:58:48	18943352	-1.77116e-10	-1.87755e-10	4.74485e-09	-2.10936e-10	5.55697e-11	-1.14771e-10	-3.7551e-13	4.72113e-09	1.98384e-11	-0.0243101	-7.95382e-05	-0.0446792	0.00420205
2022-03-15 14:59:04	18959286	-1.79503e-10	-1.86947e-10	4.92624e-09	-2.21245e-10	4.6294e-11	-1.16318e-10	-3.73894e-13	4.90161e-09	1.6527e-11	-0.0237306	-7.62799e-05	-0.0451372	0.00337174
2022-03-15 14:59:20	18975220	-1.87221e-10	-1.84388e-10	4.97516e-09	-2.23266e-10	3.28719e-11	-1.21319e-10	-3.68776e-13	4.95028e-09	1.17353e-11	-0.0245075	-7.44959e-05	-0.0451017	0.00237063
2022-03-15 14:59:36	18991152	-1.68355e-10	-1.89926e-10	2.77663e-08	-2.20965e-10	6.46611e-11	-1.09094e-10	-3.79852e-13	2.76275e-08	2.3084e-11	-0.00394875	-1.37491e-05	-0.00799802	0.000835546
2022-03-15 14:59:52	19007594	-1.57068e-10	-1.87919e-10	1.46916e-07	-2.14182e-10	3.37242e-11	-1.0178e-10	-3.75838e-13	1.46181e-07	1.20395e-11	-0.000696259	-2.57104e-06	-0.00146518	8.23603e-05
2022-03-15 15:00:08	19023256	-1.76514e-10	-1.91891e-10	2.63464e-07	-2.18235e-10	1.13949e-11	-1.14381e-10	-3.83782e-13	2.62147e-07	4.06798e-12	-0.000436325	-1.464e-06	-0.000832492	1.5518e-05
2022-03-15 15:00:23	19038412	-1.72365e-10	-1.87991e-10	3.05299e-07	-2.06378e-10	3.01844e-11	-1.11693e-10	-3.75982e-13	3.03773e-07	1.07758e-11	-0.000367685	-1.23771e-06	-0.000679383	3.54734e-05
2022-03-15 15:00:38	19053564	-1.82986e-10	-1.92783e-10	3.4167e-07	-2.14236e-10	5.5132e-12	-1.18575e-10	-3.85566e-13	3.39962e-07	1.96821e-12	-0.000348789	-1.13415e-06	-0.000630177	5.78951e-06
2022-03-15 15:00:53	19068716	-1.7903e-10	-1.88647e-10	3.64693e-07	-2.10473e-10	2.94011e-11	-1.16011e-10	-3.77294e-13	3.6287e-07	1.04962e-11	-0.000319706	-1.03975e-06	-0.000580024	2.89255e-05
2022-03-15 15:01:08	19083868	-1.85028e-10	-1.97687e-10	3.77862e-07	-2.01336e-10	1.4643e-11	-1.19898e-10	-3.95374e-13	3.75973e-07	5.22755e-12	-0.000318901	-1.0516e-06	-0.000535507	1.39041e-05
2022-03-15 15:01:24	19099020	-1.93026e-10	-1.94103e-10	3.87357e-07	-2.08302e-10	1.90966e-11	-1.25081e-10	-3.88206e-13	3.8542e-07	6.81749e-12	-0.000324531	-1.00723e-06	-0.000540454	1.76884e-05
2022-03-15 15:01:39	19114174	1.17572e-10	-1.92291e-10	3.70337e-07	-1.18884e-10	8.37036e-11	7.61867e-11	-3.84582e-13	3.68485e-07	2.98822e-11	0.000206756	-1.04368e-06	-0.000322629	8.10946e-05
2022-03-15 15:01:54	19129326	4.88378e-09	-1.74006e-10	3.54391e-07	6.11351e-11	1.49209e-10	3.16469e-09	-3.48012e-13	3.52619e-07	5.32676e-11	0.00897481	-9.86935e-07	0.000173374	0.000151063
2022-03-15 15:02:12	19147728	8.30903e-09	-1.75859e-10	3.41759e-07	1.34084e-10	1.40049e-10	5.38425e-09	-3.51718e-13	3.4005e-07	4.99975e-11	0.0158337	-1.03431e-06	0.000394306	0.00014703
2022-03-15 15:02:25	19160672	9.9321e-09	-1.76954e-10	3.41491e-07	1.83695e-10	1.60559e-10	6.436e-09	-3.53908e-13	3.39784e-07	5.73196e-11	0.0189415	-1.04157e-06	0.000540624	0.000168694
2022-03-15 15:02:39	19174656	1.10253e-08	-1.74969e-10	3.40774e-07	2.01433e-10	1.38329e-10	7.14439e-09	-3.49938e-13	3.3907e-07	4.93835e-11	0.0210706	-1.03205e-06	0.000594075	0.000145644
2022-03-15 15:02:52	19187068	1.14527e-08	-1.79012e-10	3.38534e-07	2.22696e-10	1.48004e-10	7.42135e-09	-3.58024e-13	3.36841e-07	5.28374e-11	0.0220322	-1.06289e-06	0.00066113	0.000156861
2022-03-15 15:03:04	19199480	1.16273e-08	-1.68334e-10	3.3522e-07	2.33941e-10	1.48611e-10	7.53449e-09	-3.36668e-13	3.33544e-07	5.30541e-11	0.0225892	-1.00937e-06	0.00070138	0.000159062
2022-03-15 15:03:16	19211894	1.18068e-08	-1.74374e-10	3.32532e-07	2.26072e-10	1.41354e-10	7.65081e-09	-3.48748e-13	3.30869e-07	5.04634e-11	0.0231233	-1.05404e-06	0.000683267	0.000152518
2022-03-15 15:03:29	19224306	1.18169e-08	-1.6985e-10	3.31188e-07	2.28447e-10	1.46875e-10	7.65735e-09	-3.397e-13	3.29532e-07	5.24344e-11	0.023237	-1.03086e-06	0.000693247	0.000159118
2022-03-15 15:03:41	19236720	1.19182e-08	-1.60563e-10	3.30383e-07	2.34478e-10	1.46069e-10	7.72299e-09	-3.21126e-13	3.28731e-07	5.21466e-11	0.0234933	-9.76865e-07	0.000713282	0.00015863
2022-03-15 15:03:54	19249132	1.05006e-08	-1.80702e-10	3.36922e-07	1.55735e-10	1.21589e-10	6.80439e-09	-3.61404e-13	3.35237e-07	4.34073e-11	0.0202972	-1.07805e-06	0.000464551	0.000129482
2022-03-15 15:04:07	19262054	8.06667e-09	-1.77753e-10	3.39251e-07	3.16587e-11	1.17105e-10	5.2272e-09	-3.55506e-13	3.37555e-07	4.18065e-11	0.0154855	-1.05318e-06	9.37883e-05	0.000123851
2022-03-15 15:04:19	19274996	3.91799e-09	-1.76903e-10	3.14526e-07	-5.58569e-11	1.23594e-10	2.53886e-09	-3.53806e-13	3.12953e-07	4.41231e-11	0.00811257	-1.13054e-06	-0.000178483	0.000140989
2022-03-15 15:04:32	19287940	2.4286e-09	-1.80036e-10	3.1372e-07	-7.40243e-11	8.7735e-11	1.57373e-09	-3.60072e-13	3.12151e-07	3.13214e-11	0.00504157	-1.15352e-06	-0.000237142	0.00010034
2022-03-15 15:04:45	19300884	1.51198e-09	-1.79729e-10	3.2017e-07	-1.15777e-10	7.69236e-11	9.79763e-10	-3.59458e-13	3.18569e-07	2.74617e-11	0.00307551	-1.12835e-06	-0.000363428	8.62033e-05
2022-03-15 15:04:58	19313824	1.00456e-09	-1.772e-10	3.34862e-07	-1.48919e-10	6.27722e-11	6.50955e-10	-3.544e-13	3.33188e-07	2.24097e-11	0.00195372	-1.06366e-06	-0.000446952	6.72584e-05
2022-03-15 15:05:12	19327808	6.17909e-10	-1.78582e-10	3.5233e-07	-1.64517e-10	6.92836e-11	4.00405e-10	-3.57164e-13	3.50568e-07	2.47342e-11	0.00114216	-1.01881e-06	-0.000469287	7.05547e-05
2022-03-15 15:05:27	19342962	3.54491e-10	-1.75879e-10	3.61468e-07	-1.65119e-10	6.64656e-11	2.2971e-10	-3.51758e-13	3.59661e-07	2.37282e-11	0.000638686	-9.78027e-07	-0.000459097	6.59739e-05
2022-03-15 15:05:43	19358116	2.00863e-10	-1.82944e-10	3.55287e-07	-1.71945e-10	7.35064e-11	1.30159e-10	-3.65888e-13	3.53511e-07	2.62418e-11	0.00036819	-1.03501e-06	-0.000486393	7.4232e-05
2022-03-15 15:05:58	19373268	1.10445e-10	-1.83691e-10	2.28706e-07	-1.79524e-10	1.05849e-10	7.15684e-11	-3.67382e-13	2.27562e-07	3.77881e-11	0.0003145	-1.61442e-06	-0.0007889	0.000166056
2022-03-15 15:06:13	19388420	5.38681e-11	-1.77917e-10	1.23177e-07	-2.01099e-10	1.04628e-10	3.49065e-11	-3.55834e-13	1.22561e-07	3.73522e-11	0.000284809	-2.90332e-06	-0.00164081	0.000304764
2022-03-15 15:06:28	19403574	5.67599e-12	-1.76135e-10	6.40536e-08	-1.96713e-10	1.10256e-10	3.67804e-12	-3.5227e-13	6.37333e-08	3.93614e-11	5.77099e-05	-5.52725e-06	-0.0030865	0.000617595
2022-03-15 15:06:44	19419236	-2.15644e-11	-1.7589e-10	3.53965e-08	-2.04292e-10	1.0763e-10	-1.39737e-11	-3.5178e-13	3.52195e-08	3.84239e-11	-0.000396761	-9.98821e-06	-0.00580053	0.00109098
2022-03-15 15:06:59	19434640	-4.75579e-11	-1.75829e-10	2.08381e-08	-2.00444e-10	1.04559e-10	-3.08175e-11	-3.51658e-13	2.07339e-08	3.73276e-11	-0.00148633	-1.69605e-05	-0.00966745	0.00180031
2022-03-15 15:07:15	19450044	-5.96839e-11	-1.81653e-10	1.35113e-08	-2.02228e-10	1.15608e-10	-3.86752e-11	-3.63306e-13	1.34437e-08	4.12721e-11	-0.00287682	-2.70242e-05	-0.0150425	0.00306998
2022-03-15 15:07:30	19465446	-7.11003e-11	-1.74292e-10	9.74542e-09	-2.06324e-10	1.05004e-10	-4.6073e-11	-3.48584e-13	9.69669e-09	3.74864e-11	-0.00475141	-3.59488e-05	-0.0212778	0.0038659
2022-03-15 15:07:45	19480848	-8.54516e-11	-1.6729e-10	7.79428e-09	-2.06023e-10	9.47993e-11	-5.53726e-11	-3.3458e-13	7.75531e-09	3.38434e-11	-0.00713997	-4.31421e-05	-0.0265654	0.00436389
2022-03-15 15:08:01	19496252	-1.01694e-10	-1.69829e-10	6.69555e-09	-2.0527e-10	9.83086e-11	-6.58977e-11	-3.39658e-13	6.66207e-09	3.50962e-11	-0.00989147	-5.09838e-05	-0.0308117	0.00526806
2022-03-15 15:08:17	19512696	-1.022e-10	-1.8195e-10	6.15679e-09	-1.98175e-10	1.1064e-10	-6.62256e-11	-3.639e-13	6.12601e-09	3.94985e-11	-0.0108106	-5.94025e-05	-0.0323498	0.00644767
2022-03-15 15:08:33	19528628	-9.83408e-11	-1.71406e-10	5.85742e-09	-1.99616e-10	1.07554e-10	-6.37248e-11	-3.42812e-13	5.82813e-09	3.83968e-11	-0.010934	-5.88202e-05	-0.0342504	0.00658818
2022-03-15 15:08:49	19544562	-1.07736e-10	-1.82472e-10	5.65146e-09	-2.02174e-10	9.59279e-11	-6.98129e-11	-3.64944e-13	5.6232e-09	3.42463e-11	-0.0124152	-6.48997e-05	-0.0359535	0.00609017
2022-03-15 15:09:05	19560496	-1.11799e-10	-1.74917e-10	5.53747e-09	-2.06184e-10	7.65321e-11	-7.24458e-11	-3.49834e-13	5.50978e-09	2.7322e-11	-0.0131486	-6.34932e-05	-0.0374214	0.00495881
2022-03-15 15:09:21	19576428	-1.21711e-10	-1.7075e-10	5.4704e-09	-2.11194e-10	8.5685e-11	-7.88687e-11	-3.415e-13	5.44305e-09	3.05895e-11	-0.0144898	-6.27406e-05	-0.0388007	0.00561993
2022-03-15 15:09:37	19592360	-1.26742e-10	-1.7979e-10	5.4046e-09	-2.0183e-10	8.03329e-11	-8.21288e-11	-3.5958e-13	5.37758e-09	2.86788e-11	-0.0152725	-6.68665e-05	-0.0375318	0.00533304
2022-03-15 15:09:53	19608294	-1.24216e-10	-1.75132e-10	5.36049e-09	-2.08538e-10	7.79214e-11	-8.0492e-11	-3.50264e-13	5.33369e-09	2.78179e-11	-0.0150912	-6.56701e-05	-0.0390983	0.00521552
2022-03-15 15:10:09	19624228	-1.21367e-10	-1.75368e-10	5.30955e-09	-1.96756e-10	8.50243e-11	-7.86458e-11	-3.50736e-13	5.283e-09	3.03537e-11	-0.0148866	-6.63895e-05	-0.0372432	0.00574554
2022-03-15 15:10:25	19640160	-1.25086e-10	-1.53223e-10	5.32762e-09	-1.9294e-10	8.05093e-11	-8.10557e-11	-3.06446e-13	5.30098e-09	2.87418e-11	-0.0152907	-5.78093e-05	-0.036397	0.00542198
2022-03-15 15:10:41	19656094	-1.24259e-10	-1.6433e-10	5.26493e-09	-2.00981e-10	7.677e-11	-8.05198e-11	-3.2866e-13	5.23861e-09	2.74069e-11	-0.0153705	-6.27381e-05	-0.0383654	0.00523171
2022-03-15 15:10:57	19672024	-1.27183e-10	-1.64535e-10	5.25393e-09	-1.90274e-10	6.54904e-11	-8.24146e-11	-3.2907e-13	5.22766e-09	2.33801e-11	-0.0157651	-6.29479e-05	-0.0363975	0.00447238
2022-03-15 15:11:12	19687960	-1.33794e-10	-1.69552e-10	5.23843e-09	-1.9337e-10	8.10314e-11	-8.66985e-11	-3.39104e-13	5.21224e-09	2.89282e-11	-0.0166336	-6.50592e-05	-0.0370992	0.00555006
2022-03-15 15:11:28	19703890	-1.32998e-10	-1.65539e-10	5.20314e-09	-1.98466e-10	8.216e-11	-8.61827e-11	-3.31078e-13	5.17712e-09	2.93311e-11	-0.0166468	-6.39502e-05	-0.0383352	0.00566552
2022-03-15 15:11:44	19719824	-1.51542e-10	-1.77549e-10	5.20307e-09	-1.80771e-10	8.18529e-11	-9.81992e-11	-3.55098e-13	5.17705e-09	2.92215e-11	-0.0189682	-6.85907e-05	-0.0349177	0.00564442
2022-03-15 15:12:00	19735756	-1.51177e-10	-1.71538e-10	5.18987e-09	-2.15193e-10	7.40593e-11	-9.79627e-11	-3.43076e-13	5.16392e-09	2.64392e-11	-0.0189706	-6.64371e-05	-0.0416724	0.00511998
2022-03-15 15:12:16	19751692	-1.48134e-10	-1.74876e-10	5.14086e-09	-2.00573e-10	6.60586e-11	-9.59908e-11	-3.49752e-13	5.11516e-09	2.35829e-11	-0.018766	-6.83756e-05	-0.0392115	0.0046104
2022-03-15 15:12:32	19767624	-1.43157e-10	-1.77118e-10	5.16159e-09	-2.06947e-10	7.62093e-11	-9.27657e-11	-3.54236e-13	5.13578e-09	2.72067e-11	-0.0180626	-6.89741e-05	-0.0402951	0.00529748
2022-03-15 15:12:48	19783556	-1.53294e-10	-1.62457e-10	5.13951e-09	-2.09259e-10	6.88613e-11	-9.93345e-11	-3.24914e-13	5.11381e-09	2.45835e-11	-0.0194247	-6.35365e-05	-0.0409204	0.00480727
2022-03-15 15:13:04	19799488	-1.44705e-10	-1.63921e-10	5.11478e-09	-1.96283e-10	6.12672e-11	-9.37688e-11	-3.27842e-13	5.08921e-09	2.18724e-11	-0.018425	-6.44191e-05	-0.0385685	0.0042978
2022-03-15 15:13:20	19815420	-1.53542e-10	-1.64884e-10	5.11481e-09	-1.92026e-10	6.5237e-11	-9.94952e-11	-3.29768e-13	5.08924e-09	2.32896e-11	-0.0195501	-6.47972e-05	-0.0377318	0.00457625
2022-03-15 15:13:36	19831354	-1.59906e-10	-1.68477e-10	5.09804e-09	-2.00347e-10	6.46534e-11	-1.03619e-10	-3.36954e-13	5.07255e-09	2.30813e-11	-0.0204274	-6.64269e-05	-0.0394963	0.00455023
2022-03-15 15:13:52	19847288	-1.46662e-10	-1.66317e-10	5.10512e-09	-2.01433e-10	8.55007e-11	-9.5037e-11	-3.32634e-13	5.07959e-09	3.05237e-11	-0.0187096	-6.54844e-05	-0.0396553	0.00600909
2022-03-15 15:14:08	19863220	-1.46382e-10	-1.64576e-10	5.10485e-09	-1.95692e-10	6.63427e-11	-9.48555e-11	-3.29152e-13	5.07933e-09	2.36843e-11	-0.0186748	-6.48023e-05	-0.0385272	0.00466289
2022-03-15 15:14:24	19879154	-1.41846e-10	-1.68231e-10	5.07576e-09	-1.981e-10	6.62276e-11	-9.19162e-11	-3.36462e-13	5.05038e-09	2.36433e-11	-0.0181999	-6.66211e-05	-0.0392248	0.00468148
2022-03-15 15:14:40	19895086	-1.42469e-10	-1.59939e-10	5.05442e-09	-1.97659e-10	8.06479e-11	-9.23199e-11	-3.19878e-13	5.02915e-09	2.87913e-11	-0.018357	-6.36048e-05	-0.0393027	0.00572489
2022-03-15 15:14:56	19911020	-1.44737e-10	-1.66747e-10	5.0675e-09	-2.06302e-10	6.84313e-11	-9.37896e-11	-3.33494e-13	5.04216e-09	2.443e-11	-0.0186011	-6.61411e-05	-0.0409154	0.00484514
2022-03-15 15:15:11	19926952	-1.47973e-10	-1.62365e-10	5.05349e-09	-1.98251e-10	5.82188e-11	-9.58865e-11	-3.2473e-13	5.02822e-09	2.07841e-11	-0.0190697	-6.45815e-05	-0.0394277	0.00413349
2022-03-15 15:15:27	19942884	-1.42018e-10	-1.58853e-10	5.0482e-09	-1.97735e-10	5.28361e-11	-9.20277e-11	-3.17706e-13	5.02296e-09	1.88625e-11	-0.0183214	-6.32508e-05	-0.0393662	0.00375525
2022-03-15 15:15:43	19958816	-1.54423e-10	-1.52414e-10	5.03303e-09	-1.96789e-10	6.23345e-11	-1.00066e-10	-3.04828e-13	5.00786e-09	2.22534e-11	-0.0199818	-6.08699e-05	-0.039296	0.00444369
2022-03-15 15:15:59	19974752	-1.51553e-10	-1.65436e-10	5.03482e-09	-2.06958e-10	6.54827e-11	-9.82063e-11	-3.30872e-13	5.00965e-09	2.33773e-11	-0.0196035	-6.6047e-05	-0.0413119	0.00466646
2022-03-15 15:16:15	19990684	-1.55756e-10	-1.58157e-10	5.02798e-09	-1.96756e-10	6.34786e-11	-1.0093e-10	-3.16314e-13	5.00284e-09	2.26619e-11	-0.0201745	-6.32269e-05	-0.0393289	0.0045298
2022-03-15 15:16:31	20006616	-1.49478e-10	-1.574e-10	5.01942e-09	-1.88522e-10	5.56081e-11	-9.68617e-11	-3.148e-13	4.99432e-09	1.98521e-11	-0.0193944	-6.30316e-05	-0.0377473	0.00397493
2022-03-15 15:16:47	20022552	-1.60938e-10	-1.58792e-10	5.04097e-09	-2.07119e-10	6.46534e-11	-1.04288e-10	-3.17584e-13	5.01577e-09	2.30813e-11	-0.020792	-6.33172e-05	-0.0412936	0.00460174
2022-03-15 15:17:03	20038484	-1.57616e-10	-1.59202e-10	5.0024e-09	-1.93381e-10	6.91301e-11	-1.02135e-10	-3.18404e-13	4.97739e-09	2.46794e-11	-0.0205198	-6.39701e-05	-0.0388519	0.00495831
2022-03-15 15:17:19	20054416	-1.51908e-10	-1.66992e-10	5.00979e-09	-1.96434e-10	5.90404e-11	-9.84364e-11	-3.33984e-13	4.98474e-09	2.10774e-11	-0.0197475	-6.70013e-05	-0.0394071	0.00422839
2022-03-15 15:17:35	20070352	-1.48715e-10	-1.61136e-10	5.04053e-09	-1.97928e-10	8.56e-11	-9.63673e-11	-3.22272e-13	5.01533e-09	3.05592e-11	-0.0192146	-6.42574e-05	-0.0394646	0.00609316
2022-03-15 15:17:51	20086284	-1.50499e-10	-1.5959e-10	5.01798e-09	-1.99981e-10	7.88971e-11	-9.75234e-11	-3.1918e-13	4.99289e-09	2.81663e-11	-0.0195324	-6.39269e-05	-0.0400532	0.00564127
2022-03-15 15:18:07	20102216	-1.51542e-10	-1.61024e-10	4.99369e-09	-1.8936e-10	6.85772e-11	-9.81992e-11	-3.22048e-13	4.96872e-09	2.44821e-11	-0.0197635	-6.48151e-05	-0.0381104	0.00492724
2022-03-15 15:18:23	20118152	-1.52176e-10	-1.51482e-10	5.0233e-09	-1.99981e-10	6.98364e-11	-9.861e-11	-3.02964e-13	4.99818e-09	2.49316e-11	-0.0197292	-6.06148e-05	-0.0400107	0.00498813
2022-03-15 15:18:39	20134084	-1.66796e-10	-1.61045e-10	4.99463e-09	-1.97251e-10	8.53236e-11	-1.08084e-10	-3.2209e-13	4.96966e-09	3.04605e-11	-0.0217487	-6.48113e-05	-0.0396911	0.0061293
2022-03-15 15:18:55	20150016	-1.5409e-10	-1.54083e-10	5.33407e-09	-1.91822e-10	8.3005e-11	-9.98503e-11	-3.08166e-13	5.3074e-09	2.96328e-11	-0.0188134	-5.80635e-05	-0.0361424	0.0055833
2022-03-15 15:19:10	20165952	-1.54864e-10	-1.62242e-10	4.79199e-09	-1.97229e-10	6.34402e-11	-1.00352e-10	-3.24484e-13	4.76803e-09	2.26482e-11	-0.0210468	-6.80541e-05	-0.0413649	0.00475
2022-03-15 15:19:26	20181884	-1.57723e-10	-1.7205e-10	4.62523e-09	-1.9351e-10	5.83186e-11	-1.02205e-10	-3.441e-13	4.6021e-09	2.08197e-11	-0.0222082	-7.47702e-05	-0.0420482	0.00452396
2022-03-15 15:19:42	20197816	-1.51413e-10	-1.56396e-10	4.71042e-09	-2.04959e-10	5.78119e-11	-9.81156e-11	-3.12792e-13	4.68687e-09	2.06388e-11	-0.0209342	-6.6738e-05	-0.0437305	0.00440355
2022-03-15 15:19:58	20213748	-1.59992e-10	-1.57359e-10	4.91292e-09	-2.01013e-10	6.44001e-11	-1.03675e-10	-3.14718e-13	4.88836e-09	2.29908e-11	-0.0212085	-6.43812e-05	-0.0411208	0.00470318
2022-03-15 15:20:14	20229680	-1.51295e-10	-1.49393e-10	5.00695e-09	-1.94198e-10	6.89227e-11	-9.80392e-11	-2.98786e-13	4.98192e-09	2.46054e-11	-0.019679	-5.99741e-05	-0.0389806	0.00493894
2022-03-15 15:20:30	20245614	-1.58444e-10	-1.55004e-10	6.8196e-09	-1.96455e-10	7.35064e-11	-1.02672e-10	-3.10008e-13	6.7855e-09	2.62418e-11	-0.015131	-4.56868e-05	-0.0289522	0.00386733
2022-03-15 15:20:46	20261548	-1.37599e-10	-1.53161e-10	1.00512e-07	-1.83265e-10	7.14336e-11	-8.91642e-11	-3.06322e-13	1.00009e-07	2.55018e-11	-0.000891557	-3.06293e-06	-0.00183248	0.000254994
2022-03-15 15:21:03	20278252	-1.46619e-10	-1.62785e-10	2.48862e-07	-1.88146e-10	4.52881e-11	-9.50091e-11	-3.2557e-13	2.47618e-07	1.61679e-11	-0.000383693	-1.31481e-06	-0.000759825	6.52936e-05
2022-03-15 15:21:18	20293404	-1.55176e-10	-1.61168e-10	2.96072e-07	-1.87941e-10	5.06631e-11	-1.00554e-10	-3.22336e-13	2.94592e-07	1.80867e-11	-0.000341334	-1.09418e-06	-0.000637971	6.13959e-05
2022-03-15 15:21:33	20308556	-1.55874e-10	-1.7116e-10	3.3307e-07	-1.80234e-10	4.79372e-11	-1.01006e-10	-3.4232e-13	3.31405e-07	1.71136e-11	-0.000304783	-1.03294e-06	-0.000543849	5.16395e-05
2022-03-15 15:21:48	20323712	-1.54832e-10	-1.70126e-10	3.57616e-07	-1.84856e-10	5.01333e-11	-1.00331e-10	-3.40252e-13	3.55828e-07	1.78976e-11	-0.000281965	-9.56226e-07	-0.00051951	5.02984e-05
2022-03-15 15:22:03	20338864	-1.64077e-10	-1.63768e-10	3.75801e-07	-1.92972e-10	3.73101e-11	-1.06322e-10	-3.27536e-13	3.73922e-07	1.33197e-11	-0.000284342	-8.75947e-07	-0.000516076	3.56216e-05
2022-03-15 15:22:19	20354016	-1.66517e-10	-1.71436e-10	3.68097e-07	-1.84362e-10	1.62785e-11	-1.07903e-10	-3.42872e-13	3.66257e-07	5.81142e-12	-0.000294611	-9.36153e-07	-0.000503369	1.58671e-05
2022-03-15 15:22:34	20369168	-1.61722e-10	-1.74109e-10	3.67112e-07	-1.64678e-10	6.52677e-11	-1.04796e-10	-3.48218e-13	3.65276e-07	2.33006e-11	-0.000286895	-9.533e-07	-0.000450831	6.37889e-05
2022-03-15 15:22:49	20384320	2.8494e-09	-1.56847e-10	3.68813e-07	3.02074e-11	1.42959e-10	1.84641e-09	-3.13694e-13	3.66969e-07	5.10364e-11	0.00503152	-8.54824e-07	8.2316e-05	0.000139075
2022-03-15 15:23:07	20402724	7.3941e-09	-1.47408e-10	3.32084e-07	1.31762e-10	1.61986e-10	4.79138e-09	-2.94816e-13	3.30424e-07	5.7829e-11	0.0145007	-8.92237e-07	0.000398767	0.000175015
2022-03-15 15:23:20	20415668	9.34096e-09	-1.46149e-10	3.39251e-07	1.86565e-10	1.48925e-10	6.05294e-09	-2.92298e-13	3.37555e-07	5.31662e-11	0.0179317	-8.65928e-07	0.000552696	0.000157504
2022-03-15 15:23:34	20429652	1.06632e-08	-1.62457e-10	3.40684e-07	2.28028e-10	1.7696e-10	6.90975e-09	-3.24914e-13	3.38981e-07	6.31747e-11	0.0203839	-9.58503e-07	0.000672688	0.000186367
2022-03-15 15:23:47	20442064	1.12437e-08	-1.61464e-10	3.3952e-07	2.38219e-10	1.49332e-10	7.28592e-09	-3.22928e-13	3.37822e-07	5.33115e-11	0.0215673	-9.55911e-07	0.00070516	0.000157809
2022-03-15 15:23:59	20454476	1.16401e-08	-1.58178e-10	3.35399e-07	2.33822e-10	1.63031e-10	7.54278e-09	-3.16356e-13	3.33722e-07	5.82021e-11	0.022602	-9.47963e-07	0.000700649	0.000174403
2022-03-15 15:24:11	20466888	1.16817e-08	-1.44101e-10	3.31995e-07	2.45013e-10	1.54469e-10	7.56974e-09	-2.88202e-13	3.30335e-07	5.51454e-11	0.0229153	-8.72454e-07	0.000741711	0.000166938
2022-03-15 15:24:24	20479300	1.17241e-08	-1.55465e-10	3.30292e-07	2.43229e-10	1.56496e-10	7.59722e-09	-3.1093e-13	3.28641e-07	5.58691e-11	0.0231171	-9.4611e-07	0.000740107	0.000170001
2022-03-15 15:24:36	20491714	1.19182e-08	-1.64781e-10	3.29218e-07	2.3838e-10	1.52703e-10	7.72299e-09	-3.29562e-13	3.27572e-07	5.4515e-11	0.0235765	-1.00608e-06	0.000727718	0.000166421
2022-03-15 15:24:49	20504124	1.14352e-08	-1.55598e-10	3.31278e-07	2.13935e-10	1.54369e-10	7.41001e-09	-3.11196e-13	3.29622e-07	5.51097e-11	0.0224804	-9.44101e-07	0.000649032	0.000167191
2022-03-15 15:25:02	20517048	8.69283e-09	-1.59416e-10	3.80908e-07	1.37406e-10	1.29345e-10	5.63295e-09	-3.18832e-13	3.79003e-07	4.61762e-11	0.0148625	-8.41238e-07	0.000362546	0.000121836
2022-03-15 15:25:14	20529992	4.89492e-09	-1.5657e-10	3.14974e-07	-5.58999e-13	1.18411e-10	3.17191e-09	-3.1314e-13	3.13399e-07	4.22727e-11	0.010121	-9.99173e-07	-1.78366e-06	0.000134885
2022-03-15 15:25:27	20542936	3.01462e-09	-1.54103e-10	3.12913e-07	-5.99419e-11	1.15339e-10	1.95347e-09	-3.08206e-13	3.11348e-07	4.1176e-11	0.00627424	-9.89907e-07	-0.000192524	0.000132251
2022-03-15 15:25:40	20555880	1.88982e-09	-1.64976e-10	3.14347e-07	-1.05607e-10	1.12759e-10	1.2246e-09	-3.29952e-13	3.12775e-07	4.0255e-11	0.00391528	-1.05492e-06	-0.000337645	0.000128703
2022-03-15 15:25:53	20568820	1.21155e-09	-1.63911e-10	3.28053e-07	-1.29204e-10	9.03536e-11	7.85084e-10	-3.27822e-13	3.26413e-07	3.22562e-11	0.00240519	-1.00432e-06	-0.00039583	9.88204e-05
2022-03-15 15:26:07	20582804	7.69333e-10	-1.5311e-10	3.47313e-07	-1.34299e-10	9.01614e-11	4.98528e-10	-3.0622e-13	3.45576e-07	3.21876e-11	0.0014426	-8.86114e-07	-0.000388623	9.31418e-05
2022-03-15 15:26:22	20597956	4.62356e-10	-1.61127e-10	3.57974e-07	-1.46447e-10	6.81779e-11	2.99607e-10	-3.22254e-13	3.56184e-07	2.43395e-11	0.000841157	-9.0474e-07	-0.000411155	6.83341e-05
2022-03-15 15:26:38	20613112	2.83971e-10	-1.65436e-10	3.63528e-07	-1.55057e-10	8.12693e-11	1.84013e-10	-3.30872e-13	3.6171e-07	2.90131e-11	0.000508731	-9.14743e-07	-0.000428677	8.0211e-05
2022-03-15 15:26:53	20628264	1.53391e-10	-1.6685e-10	2.75557e-07	-1.5853e-10	8.97771e-11	9.93974e-11	-3.337e-13	2.74179e-07	3.20504e-11	0.000362527	-1.21709e-06	-0.000578198	0.000116896
2022-03-15 15:27:08	20643416	8.92893e-11	-1.62375e-10	1.53187e-07	-1.7086e-10	1.25183e-10	5.78595e-11	-3.2475e-13	1.52421e-07	4.46903e-11	0.000379603	-2.13061e-06	-0.00112097	0.000293203
2022-03-15 15:27:23	20658568	4.59024e-11	-1.6944e-10	8.20582e-08	-1.62174e-10	1.19785e-10	2.97448e-11	-3.3888e-13	8.16479e-08	4.27632e-11	0.000364305	-4.1505e-06	-0.00198626	0.000523752
2022-03-15 15:27:38	20673720	2.87024e-12	-1.58024e-10	4.37277e-08	-1.7703e-10	1.29844e-10	1.85992e-12	-3.16048e-13	4.35091e-08	4.63543e-11	4.27478e-05	-7.26396e-06	-0.00406881	0.00106539
2022-03-15 15:27:54	20689384	-1.30934e-11	-1.57819e-10	2.52573e-08	-1.85458e-10	1.31057e-10	-8.48452e-12	-3.15638e-13	2.5131e-08	4.67873e-11	-0.000337612	-1.25597e-05	-0.00737965	0.00186174
2022-03-15 15:28:09	20704788	-3.38301e-11	-1.66951e-10	1.57587e-08	-1.78653e-10	1.16468e-10	-2.19219e-11	-3.33902e-13	1.56799e-08	4.15791e-11	-0.00139809	-2.12949e-05	-0.0113938	0.00265174
2022-03-15 15:28:25	20720192	-3.81624e-11	-1.53693e-10	1.09184e-08	-1.84351e-10	1.12929e-10	-2.47292e-11	-3.07386e-13	1.08638e-08	4.03157e-11	-0.0022763	-2.82945e-05	-0.0169693	0.00371101
2022-03-15 15:28:40	20735594	-7.42178e-11	-1.4103e-10	8.47283e-09	-1.83211e-10	1.1676e-10	-4.80931e-11	-2.8206e-13	8.43047e-09	4.16833e-11	-0.00570468	-3.34572e-05	-0.021732	0.00494437
2022-03-15 15:28:55	20750996	-7.04553e-11	-1.52844e-10	7.04891e-09	-1.7445e-10	1.23479e-10	-4.5655e-11	-3.05688e-13	7.01367e-09	4.4082e-11	-0.00650944	-4.35846e-05	-0.0248729	0.00628516
2022-03-15 15:29:12	20767440	-6.71443e-11	-1.44684e-10	6.35284e-09	-1.84286e-10	1.17129e-10	-4.35095e-11	-2.89368e-13	6.32108e-09	4.18151e-11	-0.00688324	-4.57783e-05	-0.0291542	0.00661518
2022-03-15 15:29:28	20783370	-8.62578e-11	-1.43742e-10	5.98907e-09	-1.79159e-10	9.46071e-11	-5.58951e-11	-2.87484e-13	5.95912e-09	3.37747e-11	-0.00937974	-4.82427e-05	-0.0300647	0.00566773
2022-03-15 15:29:44	20799304	-9.53093e-11	-1.50039e-10	5.76282e-09	-1.81868e-10	1.00013e-10	-6.17604e-11	-3.00078e-13	5.73401e-09	3.57046e-11	-0.0107709	-5.2333e-05	-0.0317174	0.00622682
2022-03-15 15:30:00	20815236	-1.00942e-10	-1.51031e-10	5.62499e-09	-1.82932e-10	9.42386e-11	-6.54104e-11	-3.02062e-13	5.59687e-09	3.36432e-11	-0.011687	-5.39699e-05	-0.0326847	0.00601108
2022-03-15 15:30:16	20831172	-9.26326e-11	-1.48902e-10	5.51855e-09	-1.92349e-10	1.05081e-10	-6.00259e-11	-2.97804e-13	5.49096e-09	3.75139e-11	-0.0109318	-5.42354e-05	-0.0350301	0.00683194
2022-03-15 15:30:32	20847104	-1.10864e-10	-1.58372e-10	5.44728e-09	-1.77761e-10	8.86564e-11	-7.18399e-11	-3.16744e-13	5.42004e-09	3.16503e-11	-0.0132545	-5.84394e-05	-0.032797	0.0058395
2022-03-15 15:30:48	20863036	-1.1553e-10	-1.60604e-10	5.40544e-09	-1.89328e-10	1.02585e-10	-7.48634e-11	-3.21208e-13	5.37841e-09	3.66228e-11	-0.0139192	-5.97217e-05	-0.0352015	0.00680923
2022-03-15 15:31:03	20878968	-1.09434e-10	-1.59909e-10	5.35063e-09	-1.94746e-10	9.311e-11	-7.09132e-11	-3.19818e-13	5.32388e-09	3.32403e-11	-0.0133198	-6.00724e-05	-0.0365797	0.00624362
2022-03-15 15:31:19	20894900	-1.15368e-10	-1.64485e-10	5.34479e-09	-1.86759e-10	9.23193e-11	-7.47585e-11	-3.2897e-13	5.31807e-09	3.2958e-11	-0.0140575	-6.1859e-05	-0.0351178	0.00619736
2022-03-15 15:31:35	20910834	-1.2729e-10	-1.50561e-10	5.30508e-09	-1.84824e-10	8.32736e-11	-8.24839e-11	-3.01122e-13	5.27855e-09	2.97287e-11	-0.0156262	-5.70463e-05	-0.0350141	0.00563197
2022-03-15 15:31:51	20926768	-1.20174e-10	-1.60686e-10	5.28052e-09	-1.80416e-10	9.88921e-11	-7.78728e-11	-3.21372e-13	5.25412e-09	3.53045e-11	-0.0148213	-6.11657e-05	-0.034338	0.00671939
2022-03-15 15:32:07	20942700	-1.11101e-10	-1.62211e-10	5.25517e-09	-1.80535e-10	8.45179e-11	-7.19934e-11	-3.24422e-13	5.22889e-09	3.01729e-11	-0.0137684	-6.20441e-05	-0.0345264	0.00577042
2022-03-15 15:32:23	20958634	-1.18325e-10	-1.44571e-10	5.24308e-09	-1.88382e-10	8.21679e-11	-7.66746e-11	-2.89142e-13	5.21686e-09	2.93339e-11	-0.0146974	-5.54245e-05	-0.0361102	0.00562291
2022-03-15 15:32:39	20974564	-1.18787e-10	-1.51667e-10	5.22838e-09	-1.72945e-10	7.99029e-11	-7.6974e-11	-3.03334e-13	5.20224e-09	2.85253e-11	-0.0147963	-5.83084e-05	-0.0332443	0.00548328
2022-03-15 15:32:55	20990500	-1.21904e-10	-1.41101e-10	5.19611e-09	-1.86512e-10	7.55564e-11	-7.89938e-11	-2.82202e-13	5.17013e-09	2.69736e-11	-0.0152789	-5.45832e-05	-0.0360749	0.00521721
2022-03-15 15:33:11	21006432	-1.32762e-10	-1.48615e-10	5.19547e-09	-1.80868e-10	9.01457e-11	-8.60298e-11	-2.9723e-13	5.16949e-09	3.2182e-11	-0.0166418	-5.74969e-05	-0.0349876	0.00622537
2022-03-15 15:33:27	21022364	-1.29483e-10	-1.4835e-10	5.17395e-09	-1.84157e-10	9.24729e-11	-8.3905e-11	-2.967e-13	5.14808e-09	3.30128e-11	-0.0162983	-5.76331e-05	-0.035772	0.00641265
2022-03-15 15:33:43	21038296	-1.30451e-10	-1.48984e-10	5.16843e-09	-1.91295e-10	8.59379e-11	-8.45322e-11	-2.97968e-13	5.14259e-09	3.06798e-11	-0.0164377	-5.79413e-05	-0.0371982	0.00596583
2022-03-15 15:33:59	21054228	-1.40889e-10	-1.51769e-10	5.17787e-09	-1.97348e-10	6.58513e-11	-9.12961e-11	-3.03538e-13	5.15198e-09	2.35089e-11	-0.0177206	-5.89168e-05	-0.0383053	0.00456308
2022-03-15 15:34:15	21070162	-1.30719e-10	-1.55516e-10	5.14761e-09	-1.88414e-10	7.86893e-11	-8.47059e-11	-3.11032e-13	5.12187e-09	2.80921e-11	-0.0165381	-6.07262e-05	-0.0367862	0.00548473
2022-03-15 15:34:31	21086096	-1.44286e-10	-1.53673e-10	5.14602e-09	-1.88167e-10	6.93681e-11	-9.34973e-11	-3.07346e-13	5.12029e-09	2.47644e-11	-0.0182602	-6.00251e-05	-0.0367493	0.00483653
2022-03-15 15:34:47	21102028	-1.37771e-10	-1.46763e-10	5.10729e-09	-1.91887e-10	8.44021e-11	-8.92756e-11	-2.93526e-13	5.08175e-09	3.01315e-11	-0.0175679	-5.77608e-05	-0.03776	0.00592936
2022-03-15 15:35:02	21117962	-1.40663e-10	-1.67904e-10	5.11822e-09	-1.81534e-10	6.44615e-11	-9.11496e-11	-3.35808e-13	5.09263e-09	2.30128e-11	-0.0178983	-6.594e-05	-0.0356464	0.00451884
2022-03-15 15:35:18	21133896	-1.43781e-10	-1.52014e-10	5.10266e-09	-1.92886e-10	7.01744e-11	-9.31701e-11	-3.04028e-13	5.07715e-09	2.50523e-11	-0.0183509	-5.98817e-05	-0.037991	0.00493432
2022-03-15 15:35:34	21149828	-1.34708e-10	-1.59222e-10	5.09028e-09	-1.97154e-10	7.11418e-11	-8.72908e-11	-3.18444e-13	5.06483e-09	2.53976e-11	-0.0172347	-6.28736e-05	-0.0389261	0.00501451
2022-03-15 15:35:50	21165762	-1.34568e-10	-1.49434e-10	5.0836e-09	-1.83373e-10	9.291e-11	-8.72001e-11	-2.98868e-13	5.05818e-09	3.31689e-11	-0.0172394	-5.90861e-05	-0.0362527	0.00655747
2022-03-15 15:36:06	21181696	-1.39782e-10	-1.46834e-10	5.07094e-09	-1.82642e-10	7.76836e-11	-9.05787e-11	-2.93668e-13	5.04559e-09	2.7733e-11	-0.0179521	-5.8203e-05	-0.0361984	0.0054965
2022-03-15 15:36:22	21197628	-1.53638e-10	-1.52404e-10	5.07904e-09	-1.86469e-10	7.64243e-11	-9.95574e-11	-3.04808e-13	5.05364e-09	2.72835e-11	-0.0197001	-6.03145e-05	-0.0368979	0.00539877
2022-03-15 15:36:38	21213560	-1.47661e-10	-1.45933e-10	5.06058e-09	-1.91607e-10	7.01974e-11	-9.56843e-11	-2.91866e-13	5.03528e-09	2.50605e-11	-0.0190028	-5.79642e-05	-0.0380529	0.00497698
2022-03-15 15:36:54	21229494	-1.45146e-10	-1.51134e-10	5.05262e-09	-1.8806e-10	6.66115e-11	-9.40546e-11	-3.02268e-13	5.02736e-09	2.37803e-11	-0.0187086	-6.01246e-05	-0.0374073	0.00473018
2022-03-15 15:37:10	21245428	-1.31741e-10	-1.23153e-10	5.07586e-09	-1.87737e-10	7.12493e-11	-8.53682e-11	-2.46306e-13	5.05048e-09	2.5436e-11	-0.016903	-4.87688e-05	-0.0371721	0.00503635
2022-03-15 15:37:26	21261360	-1.54294e-10	-1.55116e-10	5.07111e-09	-1.94918e-10	7.0182e-11	-9.99825e-11	-3.10232e-13	5.04575e-09	2.5055e-11	-0.0198152	-6.14838e-05	-0.0386301	0.00496556
2022-03-15 15:37:42	21277294	-1.39244e-10	-1.58239e-10	5.07238e-09	-1.88565e-10	6.67881e-11	-9.02301e-11	-3.16478e-13	5.04702e-09	2.38434e-11	-0.0178779	-6.27059e-05	-0.0373617	0.00472425
2022-03-15 15:37:58	21293226	-1.48414e-10	-1.54912e-10	5.03522e-09	-1.93628e-10	8.14229e-11	-9.61723e-11	-3.09824e-13	5.01004e-09	2.9068e-11	-0.0191959	-6.18406e-05	-0.038648	0.00580194
2022-03-15 15:38:14	21309160	-1.37685e-10	-1.66962e-10	5.04712e-09	-1.8477e-10	8.38729e-11	-8.92199e-11	-3.33924e-13	5.02188e-09	2.99426e-11	-0.0177662	-6.64938e-05	-0.036793	0.00596243
2022-03-15 15:38:30	21325092	-1.50188e-10	-1.54605e-10	5.02673e-09	-1.82126e-10	8.45179e-11	-9.73218e-11	-3.0921e-13	5.0016e-09	3.01729e-11	-0.0194582	-6.18223e-05	-0.0364136	0.00603265
2022-03-15 15:38:46	21341024	-1.36879e-10	-1.44756e-10	5.021e-09	-1.86307e-10	8.27593e-11	-8.86976e-11	-2.89512e-13	4.9959e-09	2.95451e-11	-0.0177541	-5.795e-05	-0.037292	0.00591387
2022-03-15 15:39:01	21356956	-1.43157e-10	-1.61054e-10	5.00878e-09	-1.85716e-10	7.10727e-11	-9.27657e-11	-3.22108e-13	4.98374e-09	2.5373e-11	-0.0186137	-6.46318e-05	-0.0372644	0.00509115
2022-03-15 15:39:17	21372888	-1.4463e-10	-1.5307e-10	5.02981e-09	-1.73805e-10	8.41336e-11	-9.37202e-11	-3.0614e-13	5.00466e-09	3.00357e-11	-0.0187266	-6.1171e-05	-0.0347286	0.00600154
2022-03-15 15:39:33	21388820	-1.41469e-10	-1.49169e-10	5.02098e-09	-1.9667e-10	5.82802e-11	-9.16719e-11	-2.98338e-13	4.99588e-09	2.0806e-11	-0.0183495	-5.97169e-05	-0.0393665	0.00416464
2022-03-15 15:39:49	21404754	-1.46479e-10	-1.45043e-10	4.99003e-09	-1.8205e-10	1.06893e-10	-9.49184e-11	-2.90086e-13	4.96508e-09	3.81608e-11	-0.0191172	-5.84252e-05	-0.0366661	0.00768584
2022-03-15 15:40:05	21420688	-1.52897e-10	-1.59826e-10	5.17142e-09	-1.86211e-10	6.16741e-11	-9.90773e-11	-3.19652e-13	5.14556e-09	2.20177e-11	-0.0192549	-6.21219e-05	-0.0361887	0.00427896
2022-03-15 15:40:21	21436620	-1.44942e-10	-1.54922e-10	4.64205e-09	-1.94273e-10	5.89022e-11	-9.39224e-11	-3.09844e-13	4.61884e-09	2.10281e-11	-0.0203346	-6.70826e-05	-0.042061	0.00455268
2022-03-15 15:40:37	21452554	-1.54412e-10	-1.62386e-10	4.63156e-09	-2.02271e-10	6.25495e-11	-1.00059e-10	-3.24772e-13	4.6084e-09	2.23302e-11	-0.0217123	-7.04739e-05	-0.0438918	0.00484553
2022-03-15 15:40:53	21468488	-1.59992e-10	-1.54216e-10	4.88639e-09	-2.00927e-10	6.30563e-11	-1.03675e-10	-3.08432e-13	4.86196e-09	2.25111e-11	-0.0213237	-6.34378e-05	-0.0413264	0.00463005
2022-03-15 15:41:09	21484420	-1.52047e-10	-1.62836e-10	4.98866e-09	-1.97229e-10	5.42413e-11	-9.85265e-11	-3.25672e-13	4.96372e-09	1.93641e-11	-0.0198493	-6.56105e-05	-0.0397341	0.00390114
2022-03-15 15:41:25	21500354	-1.54649e-10	-1.61832e-10	5.10737e-09	-1.88361e-10	7.63014e-11	-1.00213e-10	-3.23664e-13	5.08183e-09	2.72396e-11	-0.0197198	-6.36904e-05	-0.0370656	0.00536019
2022-03-15 15:41:41	21516286	-1.45071e-10	-1.5097e-10	5.64379e-08	-1.84749e-10	6.24113e-11	-9.4006e-11	-3.0194e-13	5.61557e-08	2.22808e-11	-0.00167402	-5.37684e-06	-0.00328994	0.000396769
2022-03-15 15:41:57	21532728	-1.44221e-10	-1.62345e-10	1.76927e-07	-1.75504e-10	5.89866e-11	-9.34552e-11	-3.2469e-13	1.76042e-07	2.10582e-11	-0.000530868	-1.84439e-06	-0.000996942	0.00011962
2022-03-15 15:42:13	21548392	-1.45425e-10	-1.60676e-10	2.78962e-07	-1.82362e-10	4.79065e-11	-9.42354e-11	-3.21352e-13	2.77567e-07	1.71026e-11	-0.000339505	-1.15774e-06	-0.000657001	6.16161e-05
2022-03-15 15:42:28	21563546	-1.49553e-10	-1.56191e-10	3.26172e-07	-1.8247e-10	6.04763e-11	-9.69103e-11	-3.12382e-13	3.24541e-07	2.159e-11	-0.000298607	-9.62534e-07	-0.00056224	6.65248e-05
2022-03-15 15:42:43	21578700	-1.40953e-10	-1.61004e-10	3.45343e-07	-1.74665e-10	5.13619e-11	-9.13375e-11	-3.22008e-13	3.43616e-07	1.83362e-11	-0.000265813	-9.37115e-07	-0.000508314	5.33624e-05
2022-03-15 15:42:58	21593852	-1.42147e-10	-1.57267e-10	3.5233e-07	-1.72988e-10	6.09447e-11	-9.21113e-11	-3.14534e-13	3.50568e-07	2.17573e-11	-0.000262748	-8.97212e-07	-0.00049345	6.20628e-05
2022-03-15 15:43:14	21609004	-1.52907e-10	-1.48104e-10	3.73293e-07	-1.71311e-10	2.35348e-11	-9.90837e-11	-2.96208e-13	3.71427e-07	8.40192e-12	-0.000266765	-7.97487e-07	-0.000461224	2.26207e-05
2022-03-15 15:43:29	21624156	-1.51166e-10	-1.60819e-10	3.82341e-07	-1.86694e-10	5.30972e-11	-9.79556e-11	-3.21638e-13	3.80429e-07	1.89557e-11	-0.000257487	-8.45461e-07	-0.000490746	4.98271e-05
2022-03-15 15:43:44	21639312	1.12674e-09	-1.55311e-10	3.74368e-07	-2.79714e-11	1.31049e-10	7.30128e-10	-3.10622e-13	3.72496e-07	4.67845e-11	0.00196009	-8.33893e-07	-7.50918e-05	0.000125597
2022-03-15 15:44:02	21657716	6.95649e-09	-1.56171e-10	3.51434e-07	9.42558e-11	1.40079e-10	4.50781e-09	-3.12342e-13	3.49677e-07	5.00082e-11	0.0128913	-8.9323e-07	0.000269551	0.000143013
2022-03-15 15:44:15	21670656	8.69731e-09	-1.55577e-10	3.38983e-07	1.73332e-10	1.53955e-10	5.63586e-09	-3.11154e-13	3.37288e-07	5.49619e-11	0.0167093	-9.22517e-07	0.000513899	0.000162952
2022-03-15 15:44:29	21684640	1.01808e-08	-1.57819e-10	3.3952e-07	1.98831e-10	1.46046e-10	6.59716e-09	-3.15638e-13	3.37822e-07	5.21384e-11	0.0195285	-9.34331e-07	0.000588567	0.000154337
2022-03-15 15:44:42	21697054	1.10838e-08	-1.5828e-10	3.38176e-07	2.28125e-10	1.56028e-10	7.1823e-09	-3.1656e-13	3.36485e-07	5.5702e-11	0.0213451	-9.40785e-07	0.000677965	0.000165541
2022-03-15 15:44:54	21709464	1.14614e-08	-1.471e-10	3.34951e-07	2.29372e-10	1.50085e-10	7.42699e-09	-2.942e-13	3.33276e-07	5.35803e-11	0.0222848	-8.82751e-07	0.000688234	0.000160769
2022-03-15 15:45:06	21721880	1.15837e-08	-1.53161e-10	3.32443e-07	2.4225e-10	1.44809e-10	7.50624e-09	-3.06322e-13	3.30781e-07	5.16968e-11	0.0226925	-9.26057e-07	0.000732358	0.000156287
2022-03-15 15:45:19	21734290	1.1753e-08	-1.55434e-10	3.30113e-07	2.34349e-10	1.46576e-10	7.61594e-09	-3.10868e-13	3.28462e-07	5.23276e-11	0.0231867	-9.46434e-07	0.000713473	0.000159311
2022-03-15 15:45:31	21746704	1.18196e-08	-1.52609e-10	3.29308e-07	2.52366e-10	1.30988e-10	7.6591e-09	-3.05218e-13	3.27661e-07	4.67627e-11	0.023375	-9.31504e-07	0.000770203	0.000142717
2022-03-15 15:45:44	21759116	1.17497e-08	-1.58782e-10	3.28949e-07	2.34586e-10	1.37261e-10	7.61381e-09	-3.17564e-13	3.27304e-07	4.90022e-11	0.0232622	-9.70241e-07	0.000716722	0.000149714
2022-03-15 15:45:56	21771528	1.01842e-08	-1.54676e-10	3.3513e-07	1.70344e-10	1.17428e-10	6.59936e-09	-3.09352e-13	3.33454e-07	4.19218e-11	0.0197909	-9.27719e-07	0.000510847	0.00012572
2022-03-15 15:46:09	21784452	6.99074e-09	-1.56909e-10	3.21962e-07	4.41609e-11	1.20514e-10	4.53e-09	-3.13818e-13	3.20352e-07	4.30235e-11	0.0141407	-9.79603e-07	0.000137851	0.000134301
2022-03-15 15:46:22	21797394	3.75838e-09	-1.53602e-10	3.11838e-07	-2.38864e-11	1.17213e-10	2.43543e-09	-3.07204e-13	3.10279e-07	4.1845e-11	0.00784917	-9.9009e-07	-7.69837e-05	0.000134863
2022-03-15 15:46:35	21810336	2.33944e-09	-1.74467e-10	3.11212e-07	-7.73676e-11	8.84107e-11	1.51596e-09	-3.48934e-13	3.09656e-07	3.15626e-11	0.00489562	-1.12684e-06	-0.00024985	0.000101928
2022-03-15 15:46:48	21823280	1.50085e-09	-1.62386e-10	3.19812e-07	-9.81581e-11	9.65271e-11	9.72551e-10	-3.24772e-13	3.18213e-07	3.44602e-11	0.00305629	-1.02061e-06	-0.000308467	0.000108293
2022-03-15 15:47:01	21836220	1.01761e-09	-1.71283e-10	3.34234e-07	-1.07822e-10	7.00054e-11	6.59411e-10	-3.42566e-13	3.32563e-07	2.49919e-11	0.00198282	-1.03008e-06	-0.000324215	7.51495e-05
2022-03-15 15:47:15	21850204	6.16414e-10	-1.54451e-10	3.51434e-07	-1.41598e-10	6.80244e-11	3.99436e-10	-3.08902e-13	3.49677e-07	2.42847e-11	0.0011423	-8.83393e-07	-0.00040494	6.9449e-05
2022-03-15 15:47:30	21865356	3.66187e-10	-1.65979e-10	3.59766e-07	-1.43103e-10	7.442e-11	2.37289e-10	-3.31958e-13	3.57967e-07	2.65679e-11	0.00066288	-9.27342e-07	-0.000399766	7.42189e-05
2022-03-15 15:47:45	21880512	2.1745e-10	-1.52609e-10	3.45253e-07	-1.61324e-10	9.76707e-11	1.40908e-10	-3.05218e-13	3.43527e-07	3.48684e-11	0.000410179	-8.88484e-07	-0.000469611	0.000101501
2022-03-15 15:48:00	21895664	1.26581e-10	-1.62416e-10	2.13656e-07	-1.63733e-10	1.17781e-10	8.20245e-11	-3.24832e-13	2.12588e-07	4.20478e-11	0.000385838	-1.52799e-06	-0.00077019	0.00019779
2022-03-15 15:48:15	21910816	6.62951e-11	-1.5869e-10	1.14935e-07	-1.72945e-10	1.0849e-10	4.29592e-11	-3.1738e-13	1.1436e-07	3.87309e-11	0.000375648	-2.77526e-06	-0.00151228	0.000338675
2022-03-15 15:48:30	21925968	2.69609e-11	-1.52926e-10	6.03829e-08	-1.64528e-10	1.13113e-10	1.74707e-11	-3.05852e-13	6.0081e-08	4.03813e-11	0.000290785	-5.09066e-06	-0.00273844	0.000672115
2022-03-15 15:48:46	21941632	2.83799e-12	-1.56335e-10	3.37129e-08	-1.75138e-10	1.18595e-10	1.83902e-12	-3.1267e-13	3.35443e-08	4.23384e-11	5.48235e-05	-9.3211e-06	-0.00522109	0.00126216
2022-03-15 15:49:02	21957036	-1.20829e-11	-1.51268e-10	2.01012e-08	-1.82513e-10	1.08045e-10	-7.82972e-12	-3.02536e-13	2.00007e-08	3.85721e-11	-0.000391472	-1.51263e-05	-0.00912533	0.00192854
2022-03-15 15:49:17	21972440	-1.48672e-11	-1.51718e-10	1.31732e-08	-1.80674e-10	1.20453e-10	-9.63395e-12	-3.03436e-13	1.31073e-08	4.30017e-11	-0.000735004	-2.31501e-05	-0.0137842	0.00328074
2022-03-15 15:49:32	21987840	-5.77274e-11	-1.673e-10	9.61158e-09	-1.80771e-10	1.07231e-10	-3.74074e-11	-3.346e-13	9.56352e-09	3.82815e-11	-0.00391146	-3.49871e-05	-0.0189021	0.00400286
2022-03-15 15:49:48	22003244	-6.59618e-11	-1.45134e-10	7.74607e-09	-1.77654e-10	1.13527e-10	-4.27432e-11	-2.90268e-13	7.70734e-09	4.05291e-11	-0.00554578	-3.76612e-05	-0.02305	0.00525851
2022-03-15 15:50:03	22018646	-7.34546e-11	-1.51482e-10	6.70815e-09	-1.77965e-10	1.21221e-10	-4.75986e-11	-3.02964e-13	6.67461e-09	4.32759e-11	-0.00713129	-4.53905e-05	-0.026663	0.00648366
2022-03-15 15:50:20	22035088	-8.07753e-11	-1.53591e-10	6.15937e-09	-1.77557e-10	1.12567e-10	-5.23424e-11	-3.07182e-13	6.12857e-09	4.01864e-11	-0.00854071	-5.01229e-05	-0.028972	0.00655722
2022-03-15 15:50:36	22051020	-7.71633e-11	-1.458e-10	5.85342e-09	-1.82298e-10	8.398e-11	-5.00018e-11	-2.916e-13	5.82415e-09	2.99809e-11	-0.00858525	-5.00674e-05	-0.0313003	0.00514768
2022-03-15 15:50:51	22066954	-6.78108e-11	-1.4103e-10	5.70596e-09	-1.70989e-10	9.678e-11	-4.39414e-11	-2.8206e-13	5.67743e-09	3.45505e-11	-0.00773966	-4.96809e-05	-0.0301173	0.00608558
2022-03-15 15:51:07	22082888	-9.51911e-11	-1.40528e-10	5.58176e-09	-1.76063e-10	9.55593e-11	-6.16838e-11	-2.81056e-13	5.55385e-09	3.41147e-11	-0.0111065	-5.06056e-05	-0.0317011	0.00614253
2022-03-15 15:51:23	22098820	-9.81581e-11	-1.4797e-10	5.49501e-09	-1.69312e-10	9.526e-11	-6.36064e-11	-2.9594e-13	5.46753e-09	3.40078e-11	-0.0116335	-5.41268e-05	-0.0309668	0.00621995
2022-03-15 15:51:39	22114754	-9.58361e-11	-1.51585e-10	5.44281e-09	-1.73891e-10	8.75814e-11	-6.21018e-11	-3.0317e-13	5.4156e-09	3.12666e-11	-0.0114672	-5.59809e-05	-0.0321093	0.00577343
2022-03-15 15:51:55	22130688	-1.02619e-10	-1.46271e-10	5.396e-09	-1.84867e-10	9.72714e-11	-6.64971e-11	-2.92542e-13	5.36902e-09	3.47259e-11	-0.0123853	-5.4487e-05	-0.0344322	0.00646783
2022-03-15 15:52:11	22146620	-1.10552e-10	-1.52977e-10	5.35678e-09	-1.73085e-10	1.06694e-10	-7.16377e-11	-3.05954e-13	5.33e-09	3.80898e-11	-0.0134405	-5.74023e-05	-0.0324738	0.0071463
2022-03-15 15:52:27	22162554	-1.13122e-10	-1.43589e-10	5.33941e-09	-1.92489e-10	8.72436e-11	-7.33031e-11	-2.87178e-13	5.31271e-09	3.1146e-11	-0.0137977	-5.40549e-05	-0.0362318	0.00586253
2022-03-15 15:52:43	22178486	-1.15777e-10	-1.54216e-10	5.29365e-09	-1.78019e-10	8.3005e-11	-7.50235e-11	-3.08432e-13	5.26718e-09	2.96328e-11	-0.0142436	-5.85573e-05	-0.0337978	0.00562593
2022-03-15 15:52:59	22194420	-1.18787e-10	-1.41653e-10	5.28554e-09	-1.80137e-10	8.48786e-11	-7.6974e-11	-2.83306e-13	5.25911e-09	3.03017e-11	-0.0146363	-5.38695e-05	-0.0342524	0.00576174
2022-03-15 15:53:15	22210352	-1.14551e-10	-1.46087e-10	5.25455e-09	-1.83566e-10	8.58079e-11	-7.4229e-11	-2.92174e-13	5.22828e-09	3.06334e-11	-0.0141976	-5.58834e-05	-0.0351102	0.00585918
2022-03-15 15:53:31	22226286	-1.10284e-10	-1.45134e-10	5.24432e-09	-1.76428e-10	1.04114e-10	-7.1464e-11	-2.90268e-13	5.2181e-09	3.71687e-11	-0.0136954	-5.56272e-05	-0.0338108	0.00712304
2022-03-15 15:53:47	22242220	-1.31429e-10	-1.50039e-10	5.20511e-09	-1.79137e-10	8.57079e-11	-8.5166e-11	-3.00078e-13	5.17908e-09	3.05977e-11	-0.0164442	-5.79404e-05	-0.0345885	0.00590794
2022-03-15 15:54:03	22258152	-1.2428e-10	-1.44388e-10	5.1863e-09	-1.69011e-10	8.6545e-11	-8.05334e-11	-2.88776e-13	5.16037e-09	3.08966e-11	-0.0156061	-5.59603e-05	-0.0327517	0.00598728
2022-03-15 15:54:19	22274084	-1.25334e-10	-1.60062e-10	5.20103e-09	-1.78116e-10	7.38214e-11	-8.12164e-11	-3.20124e-13	5.17502e-09	2.63542e-11	-0.0156939	-6.18594e-05	-0.0344184	0.00509258
2022-03-15 15:54:35	22290020	-1.17035e-10	-1.56509e-10	5.16696e-09	-1.87329e-10	9.0415e-11	-7.58387e-11	-3.13018e-13	5.14113e-09	3.22782e-11	-0.0147514	-6.08851e-05	-0.0364374	0.00627842
2022-03-15 15:54:50	22305952	-1.1726e-10	-1.54881e-10	5.15896e-09	-1.71354e-10	8.18836e-11	-7.59845e-11	-3.09762e-13	5.13317e-09	2.92324e-11	-0.0148027	-6.03452e-05	-0.0333817	0.00569482
2022-03-15 15:55:06	22321886	-1.30784e-10	-1.48656e-10	5.16295e-09	-1.79642e-10	7.042e-11	-8.4748e-11	-2.97312e-13	5.13714e-09	2.51399e-11	-0.0164971	-5.78751e-05	-0.0349693	0.00489377
2022-03-15 15:55:22	22337820	-1.37169e-10	-1.46804e-10	5.12853e-09	-1.74203e-10	7.78757e-11	-8.88855e-11	-2.93608e-13	5.10289e-09	2.78016e-11	-0.0174187	-5.75376e-05	-0.0341381	0.00544821
2022-03-15 15:55:38	22353750	-1.35095e-10	-1.44183e-10	5.11725e-09	-1.85544e-10	7.78757e-11	-8.75416e-11	-2.88366e-13	5.09166e-09	2.78016e-11	-0.0171931	-5.66349e-05	-0.0364407	0.00546022
2022-03-15 15:55:54	22369684	-1.26624e-10	-1.5093e-10	5.14201e-09	-1.83512e-10	7.38671e-11	-8.20524e-11	-3.0186e-13	5.1163e-09	2.63706e-11	-0.0160374	-5.89997e-05	-0.0358681	0.00515422
2022-03-15 15:56:10	22385616	-1.25914e-10	-1.44172e-10	5.11408e-09	-1.6771e-10	9.3855e-11	-8.15923e-11	-2.88344e-13	5.08851e-09	3.35062e-11	-0.0160346	-5.66657e-05	-0.0329586	0.00658469
2022-03-15 15:56:26	22401552	-1.26075e-10	-1.42186e-10	5.11438e-09	-1.74579e-10	8.01871e-11	-8.16966e-11	-2.84372e-13	5.08881e-09	2.86268e-11	-0.0160542	-5.58818e-05	-0.0343065	0.00562544
2022-03-15 15:56:42	22417484	-1.36417e-10	-1.54124e-10	5.08343e-09	-1.82556e-10	7.06965e-11	-8.83982e-11	-3.08248e-13	5.05801e-09	2.52387e-11	-0.0174769	-6.09425e-05	-0.0360924	0.00498984
2022-03-15 15:56:58	22433416	-1.2944e-10	-1.4622e-10	5.08693e-09	-1.82652e-10	7.59793e-11	-8.38771e-11	-2.9244e-13	5.0615e-09	2.71246e-11	-0.0165716	-5.77774e-05	-0.0360866	0.00535901
2022-03-15 15:57:14	22449352	-1.34353e-10	-1.46711e-10	5.08053e-09	-1.81524e-10	7.85357e-11	-8.70607e-11	-2.93422e-13	5.05513e-09	2.80372e-11	-0.0172223	-5.80444e-05	-0.0359089	0.0055463
2022-03-15 15:57:30	22465284	-1.3546e-10	-1.46445e-10	5.10617e-09	-1.87329e-10	9.483e-11	-8.77781e-11	-2.9289e-13	5.08064e-09	3.38543e-11	-0.017277	-5.76483e-05	-0.0368711	0.0066634
2022-03-15 15:57:46	22481216	-1.2586e-10	-1.41244e-10	5.08678e-09	-1.72547e-10	7.67929e-11	-8.15573e-11	-2.82488e-13	5.06135e-09	2.74151e-11	-0.0161138	-5.58128e-05	-0.0340911	0.00541656
2022-03-15 15:58:02	22497148	-1.31665e-10	-1.5396e-10	5.07191e-09	-1.78137e-10	8.70514e-11	-8.53189e-11	-3.0792e-13	5.04655e-09	3.10773e-11	-0.0169064	-6.10159e-05	-0.0352988	0.00615814
2022-03-15 15:58:18	22513080	-1.40652e-10	-1.43773e-10	5.07549e-09	-1.76718e-10	7.88586e-11	-9.11425e-11	-2.87546e-13	5.05011e-09	2.81525e-11	-0.0180476	-5.69385e-05	-0.0349929	0.00557463
2022-03-15 15:58:34	22529014	-1.31407e-10	-1.48524e-10	5.06885e-09	-1.8892e-10	6.51833e-11	-8.51517e-11	-2.97048e-13	5.04351e-09	2.32704e-11	-0.0168834	-5.88971e-05	-0.0374581	0.00461394
2022-03-15 15:58:49	22544948	-1.45038e-10	-1.47582e-10	5.05859e-09	-1.83803e-10	7.74914e-11	-9.39846e-11	-2.95164e-13	5.0333e-09	2.76644e-11	-0.0186726	-5.86423e-05	-0.0365174	0.00549628
2022-03-15 15:59:05	22560880	-1.44759e-10	-1.54256e-10	5.05636e-09	-1.79341e-10	7.70307e-11	-9.38038e-11	-3.08512e-13	5.03108e-09	2.75e-11	-0.0186449	-6.13212e-05	-0.0356466	0.00546602
2022-03-15 15:59:21	22576814	-1.44404e-10	-1.47438e-10	5.04001e-09	-1.77772e-10	8.14464e-11	-9.35738e-11	-2.94876e-13	5.01481e-09	2.90764e-11	-0.0186595	-5.8801e-05	-0.0354494	0.0057981
2022-03-15 15:59:37	22592746	-1.33117e-10	-1.45933e-10	5.03273e-09	-1.87619e-10	6.16895e-11	-8.62598e-11	-2.91866e-13	5.00757e-09	2.20232e-11	-0.0172259	-5.8285e-05	-0.0374671	0.00439797
2022-03-15 15:59:53	22608680	-1.38449e-10	-1.42196e-10	5.04558e-09	-1.81083e-10	6.55134e-11	-8.9715e-11	-2.84392e-13	5.02035e-09	2.33883e-11	-0.0178703	-5.66478e-05	-0.0360698	0.00465869
2022-03-15 16:00:09	22624612	-1.28365e-10	-1.45462e-10	5.05225e-09	-1.73418e-10	8.04021e-11	-8.31805e-11	-2.90924e-13	5.02699e-09	2.87035e-11	-0.0165468	-5.78724e-05	-0.0344974	0.00570989
2022-03-15 16:00:25	22640546	-1.49295e-10	-1.5099e-10	5.03881e-09	-1.7689e-10	7.39057e-11	-9.67432e-11	-3.0198e-13	5.01362e-09	2.63843e-11	-0.0192961	-6.0232e-05	-0.0352819	0.00526254
2022-03-15 16:00:41	22656480	-1.36567e-10	-1.41644e-10	5.03343e-09	-1.80868e-10	7.29457e-11	-8.84954e-11	-2.83288e-13	5.00826e-09	2.60416e-11	-0.0176699	-5.65641e-05	-0.0361139	0.00519973
2022-03-15 16:00:57	22672412	-1.42286e-10	-1.44233e-10	6.29961e-09	-1.78127e-10	7.51114e-11	-9.22013e-11	-2.88466e-13	6.26811e-09	2.68148e-11	-0.0147096	-4.60212e-05	-0.028418	0.00427797
2022-03-15 16:01:13	22688344	-1.40147e-10	-1.38613e-10	4.76195e-09	-1.72343e-10	6.07681e-11	-9.08153e-11	-2.77226e-13	4.73814e-09	2.16942e-11	-0.0191669	-5.85095e-05	-0.0363736	0.00457863
2022-03-15 16:01:29	22704276	-1.37503e-10	-1.46138e-10	4.63882e-09	-1.72816e-10	6.0054e-11	-8.91019e-11	-2.92276e-13	4.61563e-09	2.14393e-11	-0.0193044	-6.33232e-05	-0.0374415	0.00464493
2022-03-15 16:01:45	22720208	-1.39201e-10	-1.36893e-10	4.74401e-09	-1.81588e-10	6.35401e-11	-9.02022e-11	-2.73786e-13	4.72029e-09	2.26838e-11	-0.0191095	-5.80019e-05	-0.0384697	0.0048056
2022-03-15 16:02:01	22736140	-1.3288e-10	-1.38163e-10	4.94553e-09	-1.80739e-10	6.35938e-11	-8.61062e-11	-2.76326e-13	4.9208e-09	2.2703e-11	-0.0174984	-5.61547e-05	-0.0367296	0.00461368
2022-03-15 16:02:17	22752074	-1.42415e-10	-1.58976e-10	5.05145e-09	-1.6972e-10	7.29307e-11	-9.22849e-11	-3.17952e-13	5.02619e-09	2.60363e-11	-0.0183608	-6.3259e-05	-0.0337671	0.00518012
2022-03-15 16:02:33	22768008	-1.30676e-10	-1.54216e-10	1.21206e-08	-1.78643e-10	7.36293e-11	-8.4678e-11	-3.08432e-13	1.206e-08	2.62857e-11	-0.0070214	-2.55748e-05	-0.0148129	0.00217957
2022-03-15 16:02:49	22784452	-1.25473e-10	-1.39135e-10	1.14218e-07	-1.73139e-10	7.03279e-11	-8.13065e-11	-2.7827e-13	1.13647e-07	2.51071e-11	-0.000715431	-2.44855e-06	-0.00152348	0.000220922
2022-03-15 16:03:05	22800114	-1.31999e-10	-1.5485e-10	2.40262e-07	-1.73461e-10	5.76813e-11	-8.55354e-11	-3.097e-13	2.39061e-07	2.05922e-11	-0.000357798	-1.29549e-06	-0.000725594	8.61381e-05
2022-03-15 16:03:20	22815266	-1.36309e-10	-1.5054e-10	2.92937e-07	-1.74622e-10	4.41978e-11	-8.83282e-11	-3.0108e-13	2.91472e-07	1.57786e-11	-0.000303042	-1.03296e-06	-0.000599103	5.41342e-05
2022-03-15 16:03:35	22830420	-1.47027e-10	-1.58485e-10	3.34951e-07	-1.7517e-10	3.88689e-11	-9.52735e-11	-3.1697e-13	3.33276e-07	1.38762e-11	-0.000285869	-9.51073e-07	-0.0005256	4.16357e-05
2022-03-15 16:03:50	22845572	-1.49607e-10	-1.64546e-10	3.58422e-07	-1.72064e-10	5.4034e-11	-9.69453e-11	-3.29092e-13	3.5663e-07	1.92901e-11	-0.000271837	-9.22783e-07	-0.000482472	5.40901e-05
2022-03-15 16:04:05	22860724	-1.43254e-10	-1.50428e-10	3.74009e-07	-1.72128e-10	4.02356e-11	-9.28286e-11	-3.00856e-13	3.72139e-07	1.43641e-11	-0.000249446	-8.08451e-07	-0.000462537	3.85988e-05
2022-03-15 16:04:20	22875876	-1.42673e-10	-1.54656e-10	3.83416e-07	-1.81663e-10	4.49196e-11	-9.24521e-11	-3.09312e-13	3.81499e-07	1.60363e-11	-0.000242339	-8.10781e-07	-0.000476182	4.2035e-05
2022-03-15 16:04:36	22891028	-1.18013e-10	-1.51503e-10	3.70068e-07	-1.39051e-10	9.77786e-11	-7.64724e-11	-3.03006e-13	3.68218e-07	3.4907e-11	-0.000207683	-8.22899e-07	-0.000377633	9.47998e-05
2022-03-15 16:04:51	22906180	3.56369e-09	-1.3379e-10	3.51972e-07	5.23846e-11	1.58823e-10	2.30927e-09	-2.6758e-13	3.50212e-07	5.66998e-11	0.00659392	-7.64051e-07	0.00014958	0.000161901
2022-03-15 16:05:09	22924584	7.52908e-09	-1.4794e-10	3.35488e-07	1.4793e-10	1.5387e-10	4.87884e-09	-2.9588e-13	3.33811e-07	5.49316e-11	0.0146156	-8.86371e-07	0.000443156	0.000164559
2022-03-15 16:05:22	22937528	9.58795e-09	-1.46087e-10	3.38893e-07	1.93134e-10	1.67884e-10	6.21299e-09	-2.92174e-13	3.37199e-07	5.99346e-11	0.0184253	-8.66475e-07	0.00057276	0.000177743
2022-03-15 16:05:36	22951512	1.0758e-08	-1.4881e-10	3.38624e-07	2.3221e-10	1.50884e-10	6.97118e-09	-2.9762e-13	3.36931e-07	5.38656e-11	0.0206902	-8.83327e-07	0.000689192	0.000159871
2022-03-15 16:05:48	22963924	1.12606e-08	-1.44684e-10	3.3737e-07	2.31597e-10	1.68529e-10	7.29687e-09	-2.89368e-13	3.35683e-07	6.01649e-11	0.0217374	-8.62027e-07	0.000689927	0.000179231
2022-03-15 16:06:01	22976336	1.16199e-08	-1.37989e-10	3.34324e-07	2.41562e-10	1.53663e-10	7.5297e-09	-2.75978e-13	3.32652e-07	5.48577e-11	0.0226353	-8.29629e-07	0.000726169	0.00016491
2022-03-15 16:06:13	22988748	1.16703e-08	-1.37251e-10	3.31009e-07	2.45669e-10	1.53816e-10	7.56235e-09	-2.74502e-13	3.29354e-07	5.49123e-11	0.0229612	-8.33456e-07	0.000745912	0.000166727
2022-03-15 16:06:26	23001160	1.17604e-08	-1.39207e-10	3.29487e-07	2.52904e-10	1.52196e-10	7.62074e-09	-2.78414e-13	3.2784e-07	5.4334e-11	0.0232453	-8.49239e-07	0.000771426	0.000165733
2022-03-15 16:06:38	23013574	1.18941e-08	-1.35542e-10	3.27605e-07	2.4998e-10	1.53771e-10	7.70738e-09	-2.71084e-13	3.25967e-07	5.48962e-11	0.0236447	-8.3163e-07	0.000766888	0.00016841
2022-03-15 16:06:50	23025986	1.12505e-08	-1.43558e-10	3.3083e-07	2.20707e-10	1.41224e-10	7.29032e-09	-2.87116e-13	3.29176e-07	5.0417e-11	0.0221472	-8.72227e-07	0.000670484	0.000153161
2022-03-15 16:07:03	23038908	8.0401e-09	-1.44172e-10	3.31905e-07	1.04371e-10	1.40486e-10	5.20998e-09	-2.88344e-13	3.30245e-07	5.01535e-11	0.0157761	-8.7312e-07	0.000316041	0.000151867
2022-03-15 16:07:16	23051852	3.00092e-09	-1.35551e-10	1.67968e-07	-6.55749e-11	1.49416e-10	1.9446e-09	-2.71102e-13	1.67128e-07	5.33415e-11	0.0116354	-1.62212e-06	-0.000392363	0.000319165
2022-03-15 16:07:29	23064796	1.58784e-09	-1.37999e-10	1.37868e-07	-9.704e-11	1.43804e-10	1.02892e-09	-2.75998e-13	1.37179e-07	5.1338e-11	0.00750059	-2.01196e-06	-0.000707399	0.000374242
2022-03-15 16:07:42	23077740	1.22711e-09	-1.36217e-10	1.35002e-07	-1.00619e-10	1.5e-10	7.95167e-10	-2.72434e-13	1.34327e-07	5.355e-11	0.00591964	-2.02814e-06	-0.00074906	0.000398654
2022-03-15 16:07:55	23090680	9.75335e-10	-1.35644e-10	1.37868e-07	-1.0693e-10	1.42652e-10	6.32017e-10	-2.71288e-13	1.37179e-07	5.09268e-11	0.00460726	-1.97763e-06	-0.000779494	0.000371244
2022-03-15 16:08:09	23104664	7.83609e-10	-1.38142e-10	1.41989e-07	-1.26505e-10	1.32401e-10	5.07779e-10	-2.76284e-13	1.41279e-07	4.72672e-11	0.00359415	-1.95559e-06	-0.000895426	0.000334566
2022-03-15 16:08:24	23119816	5.9543e-10	-1.38316e-10	1.45303e-07	-1.26355e-10	1.34528e-10	3.85839e-10	-2.76632e-13	1.44576e-07	4.80265e-11	0.00266875	-1.9134e-06	-0.000873966	0.000332187
2022-03-15 16:08:39	23134972	4.54982e-10	-1.38306e-10	1.4396e-07	-1.44264e-10	1.35196e-10	2.94828e-10	-2.76612e-13	1.4324e-07	4.8265e-11	0.00205828	-1.93111e-06	-0.00100715	0.000336951
2022-03-15 16:08:55	23150124	3.3627e-10	-1.43742e-10	1.45841e-07	-1.41211e-10	1.20991e-10	2.17903e-10	-2.87484e-13	1.45112e-07	4.31938e-11	0.00150162	-1.98112e-06	-0.000973119	0.000297659
2022-03-15 16:09:10	23165276	2.52216e-10	-1.48749e-10	1.4826e-07	-1.55477e-10	1.25621e-10	1.63436e-10	-2.97498e-13	1.47519e-07	4.48467e-11	0.0011079	-2.01668e-06	-0.00105395	0.000304007
2022-03-15 16:09:25	23180428	1.84652e-10	-1.52087e-10	1.51037e-07	-1.66184e-10	1.36755e-10	1.19654e-10	-3.04174e-13	1.50282e-07	4.88215e-11	0.000796201	-2.02402e-06	-0.00110582	0.000324867
2022-03-15 16:09:40	23195582	1.39545e-10	-1.53335e-10	1.55068e-07	-1.60905e-10	1.23571e-10	9.04252e-11	-3.0667e-13	1.54293e-07	4.41148e-11	0.000586063	-1.98759e-06	-0.00104286	0.000285917
2022-03-15 16:09:55	23210736	8.03238e-11	-1.46384e-10	1.55337e-07	-1.58175e-10	1.34129e-10	5.20498e-11	-2.92768e-13	1.5456e-07	4.78841e-11	0.000336761	-1.8942e-06	-0.00102339	0.000309808
2022-03-15 16:10:10	23225888	5.37929e-11	-1.47162e-10	1.55785e-07	-1.69118e-10	1.27364e-10	3.48578e-11	-2.94324e-13	1.55006e-07	4.54689e-11	0.00022488	-1.89879e-06	-0.00109104	0.000293337
2022-03-15 16:10:26	23241040	1.56304e-11	-1.50387e-10	1.57577e-07	-1.71268e-10	1.06755e-10	1.01285e-11	-3.00774e-13	1.56789e-07	3.81115e-11	6.45995e-05	-1.91833e-06	-0.00109235	0.000243075
2022-03-15 16:10:41	23256194	-8.83648e-12	-1.48533e-10	1.60981e-07	-1.7e-10	1.33868e-10	-5.72604e-12	-2.97066e-13	1.60176e-07	4.77909e-11	-3.57484e-05	-1.85462e-06	-0.00106133	0.000298365
2022-03-15 16:10:56	23271344	-1.86404e-11	-1.46968e-10	1.61787e-07	-1.59013e-10	1.328e-10	-1.2079e-11	-2.93936e-13	1.60978e-07	4.74096e-11	-7.50349e-05	-1.82594e-06	-0.000987793	0.00029451
2022-03-15 16:11:11	23286500	-4.54294e-11	-1.50212e-10	1.62952e-07	-1.61142e-10	1.25736e-10	-2.94383e-11	-3.00424e-13	1.62137e-07	4.48878e-11	-0.000181564	-1.8529e-06	-0.000993862	0.00027685
2022-03-15 16:11:26	23301650	-1.69634e-11	-1.36883e-10	1.62056e-07	-1.56476e-10	1.50354e-10	-1.09923e-11	-2.73766e-13	1.61246e-07	5.36764e-11	-6.8171e-05	-1.69782e-06	-0.00097042	0.000332886
2022-03-15 16:11:41	23316804	3.33141e-11	-1.53489e-10	1.6537e-07	-1.48543e-10	1.4504e-10	2.15875e-11	-3.06978e-13	1.64543e-07	5.17793e-11	0.000131197	-1.86564e-06	-0.00090276	0.000314685
2022-03-15 16:11:56	23331956	9.50943e-11	-1.53919e-10	1.68147e-07	-1.63517e-10	1.46322e-10	6.16211e-11	-3.07838e-13	1.67306e-07	5.2237e-11	0.000368313	-1.83997e-06	-0.000977351	0.000312224
2022-03-15 16:12:12	23347108	1.37782e-10	-1.52762e-10	1.71014e-07	-1.66968e-10	1.48795e-10	8.92827e-11	-3.05524e-13	1.70159e-07	5.31198e-11	0.000524702	-1.79552e-06	-0.000981247	0.000312178
2022-03-15 16:12:27	23362260	1.48403e-10	-1.44766e-10	1.75135e-07	-1.59454e-10	1.41124e-10	9.61651e-11	-2.89532e-13	1.74259e-07	5.03813e-11	0.000551851	-1.6615e-06	-0.000915039	0.000289117
2022-03-15 16:12:42	23377414	1.59927e-10	-1.5959e-10	1.7612e-07	-1.58702e-10	1.4074e-10	1.03633e-10	-3.1918e-13	1.75239e-07	5.02442e-11	0.000591378	-1.82139e-06	-0.00090563	0.000286717
2022-03-15 16:12:57	23392566	1.41835e-10	-1.56489e-10	1.78718e-07	-1.63883e-10	1.43205e-10	9.19091e-11	-3.12978e-13	1.77824e-07	5.11242e-11	0.000516853	-1.76004e-06	-0.0009216	0.000287498
2022-03-15 16:13:12	23407720	1.32601e-10	-1.45114e-10	1.78898e-07	-1.67516e-10	1.37837e-10	8.59254e-11	-2.90228e-13	1.78004e-07	4.92078e-11	0.000482718	-1.63046e-06	-0.000941083	0.000276443
2022-03-15 16:13:27	23422872	1.19195e-10	-1.47632e-10	1.81764e-07	-1.59551e-10	1.24799e-10	7.72384e-11	-2.95264e-13	1.80855e-07	4.45532e-11	0.000427073	-1.6326e-06	-0.000882203	0.000246348
2022-03-15 16:13:43	23438026	1.04651e-10	-1.58956e-10	1.80331e-07	-1.57788e-10	1.13543e-10	6.78138e-11	-3.17912e-13	1.79429e-07	4.05349e-11	0.000377942	-1.77179e-06	-0.000879388	0.00022591
2022-03-15 16:13:58	23453180	9.16973e-11	-1.43814e-10	1.84183e-07	-1.5896e-10	1.19132e-10	5.94199e-11	-2.87628e-13	1.83262e-07	4.25301e-11	0.000324234	-1.56949e-06	-0.000867392	0.000232073
2022-03-15 16:14:13	23468332	7.48306e-11	-1.57758e-10	1.84273e-07	-1.61056e-10	1.22734e-10	4.84902e-11	-3.15516e-13	1.83352e-07	4.3816e-11	0.000264466	-1.72082e-06	-0.0008784	0.000238973
2022-03-15 16:14:28	23483484	5.33736e-11	-1.51063e-10	1.84541e-07	-1.61841e-10	1.25421e-10	3.45861e-11	-3.02126e-13	1.83618e-07	4.47753e-11	0.000188359	-1.6454e-06	-0.000881399	0.00024385
2022-03-15 16:14:43	23498636	3.40774e-11	-1.46517e-10	1.8696e-07	-1.65216e-10	1.05519e-10	2.20822e-11	-2.93034e-13	1.86025e-07	3.76703e-11	0.000118705	-1.57524e-06	-0.000888138	0.000202501
2022-03-15 16:14:58	23513788	3.15512e-11	-1.5568e-10	1.83735e-07	-1.58938e-10	1.00834e-10	2.04452e-11	-3.1136e-13	1.82816e-07	3.59977e-11	0.000111835	-1.70313e-06	-0.000869386	0.000196907
2022-03-15 16:15:13	23528940	5.27824e-12	-1.47541e-10	1.82212e-07	-1.66022e-10	1.02984e-10	3.4203e-12	-2.95082e-13	1.81301e-07	3.67653e-11	1.88653e-05	-1.62758e-06	-0.000915726	0.000202786
2022-03-15 16:15:29	23544094	5.37499e-13	-1.5872e-10	1.85974e-07	-1.71999e-10	1.02646e-10	3.48299e-13	-3.1744e-13	1.85044e-07	3.66446e-11	1.88225e-06	-1.71548e-06	-0.000929503	0.000198032
2022-03-15 16:15:44	23559246	-5.11699e-12	-1.59806e-10	1.88393e-07	-1.74783e-10	1.09573e-10	-3.31581e-12	-3.19612e-13	1.87451e-07	3.91176e-11	-1.76889e-05	-1.70504e-06	-0.000932419	0.000208681
2022-03-15 16:15:59	23574400	-9.99748e-12	-1.60809e-10	1.8902e-07	-1.70365e-10	9.966e-11	-6.47837e-12	-3.21618e-13	1.88075e-07	3.55786e-11	-3.44457e-05	-1.71005e-06	-0.000905836	0.000189173
2022-03-15 16:16:14	23589552	-2.90894e-11	-1.47244e-10	1.86423e-07	-1.74568e-10	1.08298e-10	-1.88499e-11	-2.94488e-13	1.85491e-07	3.86624e-11	-0.000101622	-1.58761e-06	-0.000941114	0.000208433
2022-03-15 16:16:29	23604704	-3.31529e-11	-1.57379e-10	1.89468e-07	-1.64431e-10	9.66264e-11	-2.14831e-11	-3.14758e-13	1.88521e-07	3.44956e-11	-0.000113956	-1.66962e-06	-0.000872217	0.000182981
2022-03-15 16:16:44	23619856	-2.89712e-11	-1.5356e-10	1.89199e-07	-1.67753e-10	8.57079e-11	-1.87733e-11	-3.0712e-13	1.88253e-07	3.05977e-11	-9.9724e-05	-1.63142e-06	-0.000891104	0.000162535
2022-03-15 16:17:00	23635008	-3.66251e-11	-1.55045e-10	1.91797e-07	-1.77793e-10	9.10829e-11	-2.37331e-11	-3.1009e-13	1.90838e-07	3.25166e-11	-0.000124362	-1.62489e-06	-0.000931644	0.000170388
2022-03-15 16:17:15	23650162	-4.25376e-11	-1.53038e-10	1.85168e-07	-1.80266e-10	9.80086e-11	-2.75644e-11	-3.06076e-13	1.84242e-07	3.49891e-11	-0.000149609	-1.66127e-06	-0.000978419	0.000189908
2022-03-15 16:17:30	23665316	-3.99254e-11	-1.5959e-10	1.87856e-07	-1.65925e-10	8.04636e-11	-2.58717e-11	-3.1918e-13	1.86917e-07	2.87255e-11	-0.000138413	-1.70761e-06	-0.000887695	0.000153681
2022-03-15 16:17:45	23680468	-5.74264e-11	-1.56847e-10	1.87049e-07	-1.75213e-10	9.54286e-11	-3.72123e-11	-3.13694e-13	1.86114e-07	3.4068e-11	-0.000199944	-1.6855e-06	-0.00094143	0.000183049
2022-03-15 16:18:00	23695620	-4.68591e-11	-1.58894e-10	1.84183e-07	-1.64324e-10	8.96086e-11	-3.03647e-11	-3.17788e-13	1.83262e-07	3.19903e-11	-0.00016569	-1.73406e-06	-0.000896661	0.00017456
2022-03-15 16:18:15	23710774	-5.28361e-11	-1.52199e-10	1.90453e-07	-1.72117e-10	8.83107e-11	-3.42378e-11	-3.04398e-13	1.89501e-07	3.15269e-11	-0.000180674	-1.60632e-06	-0.000908266	0.000166368
2022-03-15 16:18:30	23725926	-6.08986e-11	-1.57656e-10	1.9126e-07	-1.75858e-10	8.5685e-11	-3.94623e-11	-3.15312e-13	1.90304e-07	3.05895e-11	-0.000207365	-1.65689e-06	-0.000924091	0.000160741
2022-03-15 16:18:46	23741080	-6.24359e-11	-1.64546e-10	1.93678e-07	-1.74246e-10	7.773e-11	-4.04585e-11	-3.29092e-13	1.9271e-07	2.77496e-11	-0.000209945	-1.70771e-06	-0.000904189	0.000143997
2022-03-15 16:19:01	23756232	-5.65019e-11	-1.5783e-10	1.95291e-07	-1.63475e-10	7.978e-11	-3.66132e-11	-3.1566e-13	1.94315e-07	2.84815e-11	-0.000188422	-1.62448e-06	-0.000841291	0.000146574
2022-03-15 16:19:16	23771384	-6.74883e-11	-1.62191e-10	1.94843e-07	-1.72343e-10	7.87586e-11	-4.37324e-11	-3.24382e-13	1.93869e-07	2.81168e-11	-0.000225577	-1.6732e-06	-0.000888967	0.00014503
2022-03-15 16:19:31	23786536	-6.95093e-11	-1.48647e-10	1.92782e-07	-1.84276e-10	8.60536e-11	-4.5042e-11	-2.97294e-13	1.91818e-07	3.07211e-11	-0.000234816	-1.54987e-06	-0.000960681	0.000160158
2022-03-15 16:19:46	23801688	-7.41748e-11	-1.5914e-10	1.94127e-07	-1.80717e-10	8.77121e-11	-4.80653e-11	-3.1828e-13	1.93156e-07	3.13132e-11	-0.000248841	-1.64778e-06	-0.0009356	0.000162113
2022-03-15 16:20:01	23816840	-7.00361e-11	-1.55434e-10	1.94127e-07	-1.70225e-10	9.20886e-11	-4.53834e-11	-3.10868e-13	1.93156e-07	3.28756e-11	-0.000234957	-1.60941e-06	-0.000881281	0.000170202
2022-03-15 16:20:16	23831994	-6.72411e-11	-1.53212e-10	1.94843e-07	-1.69484e-10	8.32279e-11	-4.35722e-11	-3.06424e-13	1.93869e-07	2.97124e-11	-0.000224751	-1.58057e-06	-0.00087422	0.00015326
2022-03-15 16:20:32	23847146	-8.43228e-11	-1.60246e-10	1.90991e-07	-1.69785e-10	7.36521e-11	-5.46412e-11	-3.20492e-13	1.90036e-07	2.62938e-11	-0.000287531	-1.68648e-06	-0.000893436	0.000138362
2022-03-15 16:20:47	23862300	-8.00443e-11	-1.46681e-10	1.93052e-07	-1.74214e-10	8.46171e-11	-5.18687e-11	-2.93362e-13	1.92087e-07	3.02083e-11	-0.000270028	-1.52724e-06	-0.000906955	0.000157264
2022-03-15 16:21:02	23877452	-8.58601e-11	-1.54451e-10	1.95649e-07	-1.77901e-10	8.74971e-11	-5.56373e-11	-3.08902e-13	1.94671e-07	3.12365e-11	-0.000285802	-1.58679e-06	-0.000913856	0.000160458
2022-03-15 16:21:17	23892604	-7.31428e-11	-1.43619e-10	1.96635e-07	-1.73311e-10	8.22986e-11	-4.73965e-11	-2.87238e-13	1.95652e-07	2.93806e-11	-0.000242249	-1.46811e-06	-0.000885813	0.000150168
2022-03-15 16:21:32	23907756	-7.89048e-11	-1.54329e-10	1.95291e-07	-1.7674e-10	8.193e-11	-5.11303e-11	-3.08658e-13	1.94315e-07	2.9249e-11	-0.000263132	-1.58845e-06	-0.000909556	0.000150524
2022-03-15 16:21:47	23922908	-8.34521e-11	-1.52496e-10	1.94933e-07	-1.76944e-10	9.67957e-11	-5.4077e-11	-3.04992e-13	1.93958e-07	3.45561e-11	-0.000278807	-1.57246e-06	-0.000912278	0.000178162
2022-03-15 16:22:03	23938060	-7.99368e-11	-1.6125e-10	2.00845e-07	-1.79331e-10	9.40314e-11	-5.1799e-11	-3.225e-13	1.99841e-07	3.35692e-11	-0.000259202	-1.61378e-06	-0.000897369	0.00016798
2022-03-15 16:22:18	23953214	-8.71178e-11	-1.50981e-10	1.97799e-07	-1.7387e-10	6.83852e-11	-5.64523e-11	-3.01962e-13	1.9681e-07	2.44135e-11	-0.000286837	-1.53428e-06	-0.000883441	0.000124046
2022-03-15 16:22:33	23968366	-9.34388e-11	-1.60082e-10	1.99591e-07	-1.80524e-10	8.45714e-11	-6.05483e-11	-3.20164e-13	1.98593e-07	3.0192e-11	-0.000304887	-1.61216e-06	-0.000909015	0.000152029
2022-03-15 16:22:48	23983520	-9.33206e-11	-1.56314e-10	1.9977e-07	-1.77181e-10	7.88586e-11	-6.04717e-11	-3.12628e-13	1.98771e-07	2.81525e-11	-0.000304228	-1.5728e-06	-0.000891382	0.000141633

## Sheet: Conc vector processing
Real time	ms	Ethylene mbar	Carbon monoxide mbar	Argon mbar	Ethylene oxide mbar	Carbon dioxide mbar	Corrected Ethylene	Corrected CO	Corrected Ar	Corrected CO2	Ethylene (ć )	CO (ć )	ETO (ć )	CO2 (ć )
2022-03-15 09:43:15	10952	2.33489e-11	-7.56593e-12	5.43238e-09	-3.13577e-11	2.42972e-10	1.51301e-11	-1.51319e-14	5.40522e-09	8.6741e-11	0.00279916	-2.79949e-06	-0.00580138	0.0160476
2022-03-15 09:43:34	29737	1.61894e-11	-7.66831e-12	6.12832e-09	-4.30106e-11	2.24705e-10	1.04907e-11	-1.53366e-14	6.09768e-09	8.02197e-11	0.00172045	-2.51516e-06	-0.0070536	0.0131558
2022-03-15 09:43:50	45671	1.97907e-11	-9.17331e-12	6.40858e-09	-4.27741e-11	2.44032e-10	1.28244e-11	-1.83466e-14	6.37654e-09	8.71194e-11	0.00201118	-2.87721e-06	-0.00670805	0.0136625
2022-03-15 09:44:06	61604	1.54584e-11	-1.78142e-11	6.64036e-09	-4.43651e-11	2.4212e-10	1.0017e-11	-3.56284e-14	6.60716e-09	8.64368e-11	0.00151609	-5.39239e-06	-0.0067147	0.0130823
2022-03-15 09:44:22	77536	4.51499e-13	-1.20604e-11	6.70248e-09	-4.38491e-11	2.51718e-10	2.92571e-13	-2.41208e-14	6.66897e-09	8.98633e-11	4.38706e-05	-3.61687e-06	-0.0065751	0.0134748
2022-03-15 09:44:38	93469	3.13147e-11	-1.19478e-11	4.26942e-08	-3.41204e-11	2.53714e-10	2.02919e-11	-2.38956e-14	4.24807e-08	9.05759e-11	0.000477674	-5.62504e-07	-0.000803197	0.00213216
2022-03-15 09:44:54	109912	1.03049e-10	-1.2255e-11	1.91349e-07	-1.83394e-11	2.3858e-10	6.67758e-11	-2.451e-14	1.90392e-07	8.51731e-11	0.000350727	-1.28734e-07	-9.63243e-05	0.000447356
2022-03-15 09:45:10	125576	6.74561e-11	-1.31661e-11	3.35399e-07	-2.61869e-11	2.26402e-10	4.37116e-11	-2.63322e-14	3.33722e-07	8.08255e-11	0.000130982	-7.89046e-08	-7.84692e-05	0.000242194
2022-03-15 09:45:25	140729	2.45852e-11	-1.20194e-11	3.92733e-07	-3.11964e-11	2.01501e-10	1.59312e-11	-2.40388e-14	3.90769e-07	7.19359e-11	4.07688e-05	-6.15166e-08	-7.98333e-05	0.000184088
2022-03-15 09:45:40	155881	3.64424e-12	-3.24137e-11	4.39405e-07	-4.10326e-11	1.94121e-10	2.36147e-12	-6.48274e-14	4.37208e-07	6.93012e-11	5.40125e-06	-1.48276e-07	-9.38514e-05	0.000158509
2022-03-15 09:45:56	171034	3.62274e-12	-3.36423e-11	4.65116e-07	-3.41956e-11	1.82634e-10	2.34754e-12	-6.72846e-14	4.6279e-07	6.52003e-11	5.07257e-06	-1.45389e-07	-7.389e-05	0.000140885
2022-03-15 09:46:11	186186	-2.02959e-11	-2.62811e-11	4.67266e-07	-3.75174e-11	1.79102e-10	-1.31517e-11	-5.25622e-14	4.6493e-07	6.39394e-11	-2.82876e-05	-1.13054e-07	-8.06948e-05	0.000137525
2022-03-15 09:46:26	201339	-2.04894e-11	-2.48478e-11	4.69684e-07	-2.36284e-11	2.07651e-10	-1.32771e-11	-4.96956e-14	4.67336e-07	7.41314e-11	-2.84103e-05	-1.06338e-07	-5.05598e-05	0.000158626
2022-03-15 09:46:41	216490	3.42234e-09	-5.31356e-12	4.54903e-07	4.27548e-10	3.94371e-10	2.21768e-09	-1.06271e-14	4.52628e-07	1.4079e-10	0.00489955	-2.34787e-08	0.000944589	0.000311051
2022-03-15 09:47:00	235935	1.53623e-08	1.91554e-11	4.45049e-07	6.33614e-10	5.02531e-10	9.95477e-09	3.83108e-14	4.42824e-07	1.79404e-10	0.0224802	8.65148e-08	0.00143085	0.000405135
2022-03-15 09:47:13	248349	1.56807e-08	2.37113e-11	4.17995e-07	6.48535e-10	5.41945e-10	1.01611e-08	4.74226e-14	4.15905e-07	1.93474e-10	0.0244313	1.14023e-07	0.00155933	0.000465189
2022-03-15 09:47:25	260761	1.63621e-08	3.15947e-11	4.20324e-07	6.45235e-10	5.7699e-10	1.06026e-08	6.31894e-14	4.18222e-07	2.05985e-10	0.0253517	1.5109e-07	0.0015428	0.000492526
2022-03-15 09:47:38	273174	1.62754e-08	2.66599e-11	4.2113e-07	6.39355e-10	5.87079e-10	1.05465e-08	5.33198e-14	4.19024e-07	2.09587e-10	0.0251691	1.27247e-07	0.00152582	0.000500179
2022-03-15 09:47:50	285586	1.65065e-08	3.00692e-11	4.18084e-07	6.41343e-10	5.97276e-10	1.06962e-08	6.01384e-14	4.15994e-07	2.13228e-10	0.0257124	1.44566e-07	0.00154171	0.000512574
2022-03-15 09:48:02	297999	1.60772e-08	2.32916e-11	4.11455e-07	6.23907e-10	5.93875e-10	1.0418e-08	4.65832e-14	4.09398e-07	2.12013e-10	0.0254472	1.13785e-07	0.00152396	0.000517867
2022-03-15 09:48:15	310411	1.61202e-08	2.59535e-11	4.06618e-07	6.21187e-10	5.86903e-10	1.04459e-08	5.1907e-14	4.04585e-07	2.09524e-10	0.0258188	1.28297e-07	0.00153537	0.000517875
2022-03-15 09:48:27	322824	1.59213e-08	1.73945e-11	4.0617e-07	6.1262e-10	5.86964e-10	1.0317e-08	3.4789e-14	4.04139e-07	2.09546e-10	0.0255283	8.60817e-08	0.00151586	0.0005185
2022-03-15 09:48:40	335236	1.60147e-08	8.82522e-12	4.03124e-07	6.13157e-10	5.80031e-10	1.03775e-08	1.76504e-14	4.01108e-07	2.07071e-10	0.0258721	4.40042e-08	0.00152866	0.000516247
2022-03-15 09:48:52	347649	1.49417e-08	8.98903e-12	4.07693e-07	5.64632e-10	5.45054e-10	9.68222e-09	1.79781e-14	4.05655e-07	1.94584e-10	0.0238681	4.43186e-08	0.0013919	0.00047968
2022-03-15 09:49:05	360061	1.19021e-08	1.27873e-11	4.26863e-07	3.93169e-10	4.52851e-10	7.71256e-09	2.55746e-14	4.24729e-07	1.61668e-10	0.0181588	6.0214e-08	0.000925694	0.000380638
2022-03-15 09:49:17	372984	6.39149e-09	-8.29284e-12	3.73203e-07	2.45443e-10	4.11424e-10	4.14169e-09	-1.65857e-14	3.71337e-07	1.46878e-10	0.0111534	-4.46648e-08	0.000660971	0.000395539
2022-03-15 09:49:30	385927	4.11737e-09	-7.56593e-12	3.70695e-07	1.67033e-10	3.62689e-10	2.66806e-09	-1.51319e-14	3.68842e-07	1.2948e-10	0.00723361	-4.10254e-08	0.000452858	0.000351045
2022-03-15 09:49:43	398870	2.7081e-09	-6.21451e-12	3.74278e-07	1.11993e-10	3.45136e-10	1.75485e-09	-1.2429e-14	3.72407e-07	1.23214e-10	0.00471218	-3.33749e-08	0.000300728	0.000330858
2022-03-15 09:49:56	411814	1.84763e-09	-1.7845e-11	3.88163e-07	7.98831e-11	3.13054e-10	1.19726e-09	-3.569e-14	3.86222e-07	1.1176e-10	0.00309994	-9.24079e-08	0.000206832	0.000289368
2022-03-15 09:50:09	424755	1.27737e-09	-1.21321e-11	3.9972e-07	7.01973e-11	2.81849e-10	8.27736e-10	-2.42642e-14	3.97721e-07	1.0062e-10	0.00208119	-6.1008e-08	0.000176499	0.000252991
2022-03-15 09:50:23	438739	8.50732e-10	-1.68211e-11	4.1038e-07	3.60339e-11	2.69486e-10	5.51274e-10	-3.36422e-14	4.08328e-07	9.62065e-11	0.00135008	-8.23901e-08	8.82474e-05	0.000235611
2022-03-15 09:50:38	453892	5.67921e-10	-1.76709e-11	4.14233e-07	1.95004e-11	2.55335e-10	3.68013e-10	-3.53418e-14	4.12162e-07	9.11546e-11	0.000892884	-8.57474e-08	4.73125e-05	0.000221162
2022-03-15 09:50:54	469046	4.10961e-10	-1.94523e-11	3.3092e-07	1.22549e-12	2.82279e-10	2.66303e-10	-3.89046e-14	3.29265e-07	1.00774e-10	0.000808778	-1.18156e-07	3.72189e-06	0.000306056
2022-03-15 09:51:09	484199	3.23563e-10	-2.6445e-11	1.90991e-07	2.27899e-12	2.96484e-10	2.09669e-10	-5.289e-14	1.90036e-07	1.05845e-10	0.00110331	-2.78316e-07	1.19924e-05	0.000556972
2022-03-15 09:51:24	499350	2.67018e-10	-2.22269e-11	1.04543e-07	-3.21424e-12	3.00277e-10	1.73028e-10	-4.44538e-14	1.0402e-07	1.07199e-10	0.0016634	-4.27357e-07	-3.09001e-05	0.00103056
2022-03-15 09:51:39	514504	2.04174e-10	-2.07321e-11	5.57587e-08	-1.29429e-11	2.88076e-10	1.32305e-10	-4.14642e-14	5.54799e-08	1.02843e-10	0.00238473	-7.47373e-07	-0.00023329	0.0018537
2022-03-15 09:51:55	530167	1.76235e-10	-1.78859e-11	3.23232e-08	-2.88852e-11	2.89343e-10	1.142e-10	-3.57718e-14	3.21616e-08	1.03295e-10	0.00355083	-1.11225e-06	-0.000898127	0.00321177
2022-03-15 09:52:10	545571	1.47747e-10	-2.15409e-11	2.0104e-08	-1.20292e-11	2.86295e-10	9.57401e-11	-4.30818e-14	2.00035e-08	1.02207e-10	0.00478617	-2.15372e-06	-0.000601355	0.00510948
2022-03-15 09:52:25	560974	1.24162e-10	-1.86332e-11	1.37062e-08	-2.41337e-11	2.81166e-10	8.0457e-11	-3.72664e-14	1.36377e-08	1.00376e-10	0.00589961	-2.73261e-06	-0.00176964	0.00736022
2022-03-15 09:52:41	576376	1.13853e-10	-1.37394e-11	1.03473e-08	-2.86917e-11	2.69018e-10	7.37767e-11	-2.74788e-14	1.02956e-08	9.60394e-11	0.00716588	-2.66899e-06	-0.0027868	0.00932823
2022-03-15 09:52:56	591779	1.03447e-10	-1.71897e-11	8.59375e-09	-3.58296e-11	2.68972e-10	6.70337e-11	-3.43794e-14	8.55078e-09	9.6023e-11	0.00783948	-4.02062e-06	-0.00419021	0.0112297
2022-03-15 09:53:12	607180	8.92463e-11	-2.67009e-11	7.63303e-09	-2.35209e-11	2.66837e-10	5.78316e-11	-5.34018e-14	7.59486e-09	9.52608e-11	0.00761457	-7.0313e-06	-0.00309695	0.0125428
2022-03-15 09:53:27	622584	8.32371e-11	-1.27566e-11	6.9804e-09	-3.10352e-11	2.69655e-10	5.39376e-11	-2.55132e-14	6.9455e-09	9.62668e-11	0.00776584	-3.67334e-06	-0.00446839	0.0138603
2022-03-15 09:53:44	639027	8.54193e-11	-2.8339e-11	6.66162e-09	-2.90034e-11	2.52862e-10	5.53517e-11	-5.6678e-14	6.62831e-09	9.02717e-11	0.0083508	-8.5509e-06	-0.00437568	0.0136191
2022-03-15 09:53:59	654961	5.93184e-11	-2.69773e-11	6.46338e-09	-3.42709e-11	2.46289e-10	3.84383e-11	-5.39546e-14	6.43106e-09	8.79252e-11	0.00597698	-8.38969e-06	-0.00532896	0.0136719
2022-03-15 09:54:15	670894	6.33711e-11	-2.9117e-11	6.33209e-09	-3.62274e-11	2.6071e-10	4.10645e-11	-5.8234e-14	6.30043e-09	9.30735e-11	0.00651773	-9.24286e-06	-0.00574999	0.0147726
2022-03-15 09:54:31	686827	6.49299e-11	-1.7937e-11	6.25174e-09	-3.55609e-11	2.50605e-10	4.20746e-11	-3.5874e-14	6.22048e-09	8.9466e-11	0.00676388	-5.76708e-06	-0.00571674	0.0143825
2022-03-15 09:54:47	702761	4.73429e-11	-2.0988e-11	6.16942e-09	-4.26881e-11	2.45206e-10	3.06782e-11	-4.1976e-14	6.13857e-09	8.75385e-11	0.00499761	-6.83807e-06	-0.00695408	0.0142604
2022-03-15 09:55:03	718694	5.09979e-11	-2.89021e-11	6.10677e-09	-3.54534e-11	2.43986e-10	3.30466e-11	-5.78042e-14	6.07624e-09	8.7103e-11	0.00543867	-9.51316e-06	-0.00583476	0.014335
2022-03-15 09:55:19	734627	4.14196e-11	-2.66907e-11	6.0509e-09	-4.01941e-11	2.34603e-10	2.68399e-11	-5.33814e-14	6.02065e-09	8.37533e-11	0.00445798	-8.86639e-06	-0.00667604	0.013911
2022-03-15 09:55:35	750561	2.93367e-11	-3.16151e-11	6.01736e-09	-3.51739e-11	2.42972e-10	1.90102e-11	-6.32302e-14	5.98727e-09	8.6741e-11	0.0031751	-1.05608e-05	-0.00587478	0.0144876
2022-03-15 09:55:51	766494	3.15727e-11	-2.37728e-11	5.97027e-09	-3.78721e-11	2.47464e-10	2.04591e-11	-4.75456e-14	5.94042e-09	8.83446e-11	0.00344405	-8.00375e-06	-0.00637533	0.0148718
2022-03-15 09:56:07	782425	3.08202e-11	-2.34964e-11	5.94419e-09	-3.45504e-11	2.29044e-10	1.99715e-11	-4.69928e-14	5.91447e-09	8.17687e-11	0.00337672	-7.9454e-06	-0.00584167	0.0138252
2022-03-15 09:56:23	798359	2.31447e-11	-1.93499e-11	5.92909e-09	-3.72916e-11	2.42988e-10	1.49978e-11	-3.86998e-14	5.89944e-09	8.67467e-11	0.00254223	-6.55991e-06	-0.00632121	0.0147042
2022-03-15 09:56:39	814291	1.84577e-11	-2.6107e-11	5.88878e-09	-4.13014e-11	2.39425e-10	1.19606e-11	-5.2214e-14	5.85934e-09	8.54747e-11	0.00204129	-8.91125e-06	-0.00704882	0.0145878
2022-03-15 09:56:55	830224	1.87049e-11	-2.97007e-11	5.86617e-09	-4.49241e-11	2.34564e-10	1.21208e-11	-5.94014e-14	5.83684e-09	8.37393e-11	0.0020766	-1.0177e-05	-0.00769665	0.0143467
2022-03-15 09:57:11	846157	2.15967e-11	-2.56975e-11	5.84693e-09	-4.53971e-11	2.37866e-10	1.39947e-11	-5.1395e-14	5.8177e-09	8.49182e-11	0.00240553	-8.83425e-06	-0.00780328	0.0145965
2022-03-15 09:57:27	862091	1.75869e-11	-2.87588e-11	5.82993e-09	-6.58328e-11	2.20213e-10	1.13963e-11	-5.75176e-14	5.80078e-09	7.8616e-11	0.00196462	-9.91549e-06	-0.011349	0.0135527
2022-03-15 09:57:43	878024	7.03048e-12	-2.48273e-11	5.8315e-09	-4.62141e-11	2.29451e-10	4.55575e-12	-4.96546e-14	5.80234e-09	8.1914e-11	0.000785157	-8.55768e-06	-0.00796473	0.0141174
2022-03-15 09:57:58	893956	1.24054e-11	-3.18097e-11	5.78824e-09	-5.02239e-11	2.24052e-10	8.0387e-12	-6.36194e-14	5.7593e-09	7.99866e-11	0.00139578	-1.10464e-05	-0.00872049	0.0138882
2022-03-15 09:58:14	909889	4.93424e-12	-1.4753e-11	5.75717e-09	-5.74801e-11	2.25696e-10	3.19739e-12	-2.9506e-14	5.72838e-09	8.05735e-11	0.000558166	-5.15084e-06	-0.0100343	0.0140657
2022-03-15 09:58:30	925821	5.03099e-12	-2.84823e-11	5.7662e-09	-4.34836e-11	2.08035e-10	3.26008e-12	-5.69646e-14	5.73737e-09	7.42685e-11	0.000568219	-9.9287e-06	-0.00757901	0.0129447
2022-03-15 09:58:46	941754	1.59314e-11	-3.38368e-11	5.75309e-09	-5.11376e-11	2.20804e-10	1.03235e-11	-6.76736e-14	5.72432e-09	7.8827e-11	0.00180345	-1.18221e-05	-0.00893339	0.0137705
2022-03-15 09:59:02	957686	2.68749e-12	-3.36013e-11	5.72517e-09	-5.43196e-11	2.09647e-10	1.74149e-12	-6.72026e-14	5.69654e-09	7.4844e-11	0.000305711	-1.17971e-05	-0.00953554	0.0131385
2022-03-15 09:59:18	973619	6.42849e-12	-3.10726e-11	5.71988e-09	-5.78779e-11	2.16535e-10	4.16566e-12	-6.21452e-14	5.69128e-09	7.7303e-11	0.000731937	-1.09194e-05	-0.0101696	0.0135827
2022-03-15 09:59:34	989551	-1.81674e-12	-3.2987e-11	5.69739e-09	-5.02454e-11	2.1212e-10	-1.17725e-12	-6.5974e-14	5.6689e-09	7.57268e-11	-0.000207668	-1.16379e-05	-0.00886334	0.0133583
2022-03-15 09:59:50	1005484	1.79847e-11	-2.45816e-11	5.70067e-09	-4.67409e-11	2.07497e-10	1.16541e-11	-4.91632e-14	5.67217e-09	7.40764e-11	0.00205461	-8.66745e-06	-0.0082404	0.0130596
2022-03-15 10:00:06	1021417	1.36524e-12	-2.39366e-11	5.69294e-09	-5.09441e-11	2.19084e-10	8.84676e-13	-4.78732e-14	5.66448e-09	7.8213e-11	0.00015618	-8.45148e-06	-0.00899361	0.0138076
2022-03-15 10:00:22	1037351	1.10724e-12	-2.65269e-11	5.68105e-09	-4.95896e-11	2.06215e-10	7.17492e-13	-5.30538e-14	5.65264e-09	7.36188e-11	0.00012693	-9.38566e-06	-0.00877281	0.0130238
2022-03-15 10:00:38	1053284	2.04249e-13	-2.53699e-11	5.67821e-09	-5.02024e-11	2.24076e-10	1.32353e-13	-5.07398e-14	5.64982e-09	7.99951e-11	2.34261e-05	-8.98078e-06	-0.00888567	0.0141589
2022-03-15 10:00:54	1069217	5.34274e-12	-3.40313e-11	5.66228e-09	-5.74694e-11	2.10016e-10	3.4621e-12	-6.80626e-14	5.63397e-09	7.49757e-11	0.000614504	-1.20808e-05	-0.0102005	0.0133078
2022-03-15 10:01:10	1085151	6.26724e-12	-3.5178e-11	5.67283e-09	-4.77621e-11	2.29888e-10	4.06117e-12	-7.0356e-14	5.64447e-09	8.207e-11	0.000719496	-1.24646e-05	-0.00846176	0.0145399
2022-03-15 10:01:26	1101084	-9.06223e-12	-3.14207e-11	5.64213e-09	-4.34191e-11	2.14554e-10	-5.87233e-12	-6.28414e-14	5.61392e-09	7.65958e-11	-0.00104603	-1.11939e-05	-0.00773419	0.0136439
2022-03-15 10:01:42	1117016	1.54799e-12	-2.44383e-11	5.64036e-09	-4.98046e-11	2.09018e-10	1.0031e-12	-4.88766e-14	5.61216e-09	7.46194e-11	0.000178737	-8.70906e-06	-0.00887441	0.013296
2022-03-15 10:01:57	1132949	-7.73998e-12	-3.94268e-11	5.6572e-09	-4.88371e-11	2.03274e-10	-5.01551e-12	-7.88536e-14	5.62891e-09	7.25688e-11	-0.000891026	-1.40087e-05	-0.00867611	0.0128922
2022-03-15 10:02:13	1148882	1.16099e-12	-2.26466e-11	5.62989e-09	-5.25244e-11	2.0987e-10	7.52322e-13	-4.52932e-14	5.60174e-09	7.49236e-11	0.000134301	-8.08556e-06	-0.00937644	0.0133751
2022-03-15 10:02:29	1164816	-8.58923e-12	-2.78783e-11	5.63382e-09	-6.23714e-11	2.13571e-10	-5.56582e-12	-5.57566e-14	5.60565e-09	7.62448e-11	-0.000992895	-9.9465e-06	-0.0111265	0.0136014
2022-03-15 10:02:45	1180749	2.64449e-12	-2.69466e-11	5.61424e-09	-5.00734e-11	2.04941e-10	1.71363e-12	-5.38932e-14	5.58617e-09	7.31639e-11	0.000306763	-9.64761e-06	-0.00896382	0.0130973
2022-03-15 10:03:01	1196681	9.45998e-13	-2.49399e-11	5.61056e-09	-6.13394e-11	2.00986e-10	6.13007e-13	-4.98798e-14	5.58251e-09	7.1752e-11	0.000109808	-8.93502e-06	-0.0109878	0.012853
2022-03-15 10:03:17	1212614	-3.54749e-12	-3.75634e-11	5.61814e-09	-5.97591e-11	1.99781e-10	-2.29877e-12	-7.51268e-14	5.59005e-09	7.13218e-11	-0.000411226	-1.34394e-05	-0.0106903	0.0127587
2022-03-15 10:03:33	1228547	-8.10548e-12	-2.95983e-11	5.59746e-09	-5.98129e-11	2.13433e-10	-5.25235e-12	-5.91966e-14	5.56947e-09	7.61956e-11	-0.000943061	-1.06288e-05	-0.0107394	0.0136809
2022-03-15 10:03:49	1244480	-8.67523e-12	-3.22909e-11	5.58927e-09	-5.49754e-11	2.21687e-10	-5.62155e-12	-6.45818e-14	5.56132e-09	7.91423e-11	-0.00101083	-1.16127e-05	-0.00988531	0.0142308
2022-03-15 10:04:05	1260414	-1.21689e-11	-3.16253e-11	5.54214e-09	-5.01056e-11	1.93937e-10	-7.88545e-12	-6.32506e-14	5.51443e-09	6.92355e-11	-0.00142997	-1.147e-05	-0.00908627	0.0125553
2022-03-15 10:04:21	1276347	-1.54799e-12	-3.41951e-11	5.21308e-09	-5.33199e-11	2.0223e-10	-1.0031e-12	-6.83902e-14	5.18701e-09	7.21961e-11	-0.000193386	-1.31849e-05	-0.0102795	0.0139186
2022-03-15 10:04:37	1292281	-7.63248e-12	-5.11494e-11	5.17627e-09	-7.04983e-11	2.10146e-10	-4.94585e-12	-1.02299e-13	5.15039e-09	7.50221e-11	-0.000960286	-1.98623e-05	-0.013688	0.0145663
2022-03-15 10:04:53	1308214	-2.41982e-11	-4.57232e-11	5.43721e-09	-6.32744e-11	2.00518e-10	-1.56804e-11	-9.14464e-14	5.41002e-09	7.15849e-11	-0.0028984	-1.69031e-05	-0.0116958	0.0132319
2022-03-15 10:05:09	1324147	-2.15859e-11	-3.9222e-11	5.57668e-09	-5.35564e-11	2.08879e-10	-1.39877e-11	-7.8444e-14	5.5488e-09	7.45698e-11	-0.00252085	-1.41371e-05	-0.00965189	0.0134389
2022-03-15 10:05:25	1340081	-1.30719e-11	-3.6038e-11	5.68533e-09	-6.58543e-11	1.98682e-10	-8.47059e-12	-7.2076e-14	5.6569e-09	7.09295e-11	-0.00149739	-1.27412e-05	-0.0116414	0.0125386
2022-03-15 10:05:41	1356014	-1.03092e-11	-3.67342e-11	5.16682e-08	-5.25674e-11	2.2072e-10	-6.68036e-12	-7.34684e-14	5.14099e-08	7.8797e-11	-0.000129943	-1.42907e-06	-0.00102252	0.00153272
2022-03-15 10:05:57	1372457	7.10573e-12	-4.70337e-11	2.02189e-07	-6.21349e-11	1.98053e-10	4.60451e-12	-9.40674e-14	2.01178e-07	7.07049e-11	2.28878e-05	-4.67583e-07	-0.000308855	0.000351454
2022-03-15 10:06:13	1388120	9.65348e-12	-3.6898e-11	2.8577e-07	-4.60744e-11	1.98452e-10	6.25546e-12	-7.3796e-14	2.84341e-07	7.08474e-11	2.19998e-05	-2.59533e-07	-0.000162039	0.000249163
2022-03-15 10:06:28	1403274	-2.82724e-12	-5.08832e-11	3.38624e-07	-4.99014e-11	1.82604e-10	-1.83205e-12	-1.01766e-13	3.36931e-07	6.51896e-11	-5.43747e-06	-3.02039e-07	-0.000148106	0.000193481
2022-03-15 10:06:43	1418426	-2.69717e-11	-5.55723e-11	3.62901e-07	-6.07374e-11	1.51597e-10	-1.74777e-11	-1.11145e-13	3.61086e-07	5.41201e-11	-4.8403e-05	-3.07806e-07	-0.000168207	0.000149881
2022-03-15 10:06:58	1433579	-2.07689e-11	-4.64399e-11	3.87088e-07	-3.43891e-11	1.75677e-10	-1.34582e-11	-9.28798e-14	3.85153e-07	6.27167e-11	-3.49426e-05	-2.41151e-07	-8.9287e-05	0.000162836
2022-03-15 10:07:13	1448731	-2.30372e-11	-5.00028e-11	4.0178e-07	-4.78159e-11	1.66824e-10	-1.49281e-11	-1.00006e-13	3.99771e-07	5.95562e-11	-3.73416e-05	-2.50157e-07	-0.000119608	0.000148976
2022-03-15 10:07:28	1463884	-2.47464e-11	-5.5347e-11	3.87537e-07	-4.44941e-11	1.80108e-10	-1.60357e-11	-1.10694e-13	3.85599e-07	6.42986e-11	-4.15863e-05	-2.8707e-07	-0.000115389	0.00016675
2022-03-15 10:07:44	1479036	2.99876e-09	-4.3522e-11	3.81893e-07	2.80746e-10	3.12402e-10	1.9432e-09	-8.7044e-14	3.79984e-07	1.11528e-10	0.0051139	-2.29073e-07	0.000738837	0.000293506
2022-03-15 10:08:03	1498480	1.12417e-08	-3.40313e-11	3.60751e-07	4.1497e-10	3.93556e-10	7.28462e-09	-6.80626e-14	3.58947e-07	1.40499e-10	0.0202944	-1.89617e-07	0.00115608	0.000391421
2022-03-15 10:08:15	1510894	1.16737e-08	-1.84592e-11	3.6093e-07	4.5338e-10	4.24731e-10	7.56456e-09	-3.69184e-14	3.59125e-07	1.51629e-10	0.0210638	-1.02801e-07	0.00126246	0.000422217
2022-03-15 10:08:28	1523306	1.27199e-08	-1.73637e-11	3.64693e-07	4.78858e-10	4.21768e-10	8.2425e-09	-3.47274e-14	3.6287e-07	1.50571e-10	0.0227148	-9.57022e-08	0.00131964	0.000414946
2022-03-15 10:08:40	1535719	1.30759e-08	-1.85104e-11	3.67112e-07	4.67914e-10	4.49503e-10	8.47318e-09	-3.70208e-14	3.65276e-07	1.60473e-10	0.0231966	-1.0135e-07	0.00128099	0.000439318
2022-03-15 10:08:53	1548130	1.35079e-08	-2.01485e-11	3.65768e-07	4.66839e-10	4.57504e-10	8.75312e-09	-4.0297e-14	3.63939e-07	1.63329e-10	0.0240511	-1.10725e-07	0.00128274	0.000448781
2022-03-15 10:09:05	1560544	1.34582e-08	-2.37011e-11	3.63349e-07	4.70053e-10	4.58034e-10	8.72091e-09	-4.74022e-14	3.61532e-07	1.63518e-10	0.0241221	-1.31115e-07	0.00130017	0.000452292
2022-03-15 10:09:17	1572956	1.36403e-08	-1.91861e-11	3.61468e-07	4.67291e-10	4.50401e-10	8.83891e-09	-3.83722e-14	3.59661e-07	1.60793e-10	0.0245757	-1.0669e-07	0.00129926	0.000447069
2022-03-15 10:09:30	1585369	1.35764e-08	-2.05273e-11	3.60662e-07	4.70483e-10	4.46193e-10	8.79751e-09	-4.10546e-14	3.58859e-07	1.59291e-10	0.0245152	-1.14403e-07	0.00131105	0.000443882
2022-03-15 10:09:42	1597780	1.37707e-08	-2.39775e-11	3.60751e-07	4.62163e-10	4.31028e-10	8.92341e-09	-4.7955e-14	3.58947e-07	1.53877e-10	0.02486	-1.33599e-07	0.00128755	0.00042869
2022-03-15 10:09:55	1610194	1.23523e-08	-3.3847e-11	3.6523e-07	4.23527e-10	4.13498e-10	8.00429e-09	-6.7694e-14	3.63404e-07	1.47619e-10	0.0220259	-1.86278e-07	0.00116544	0.000406211
2022-03-15 10:10:07	1622606	9.52244e-09	-3.18915e-11	3.51434e-07	2.53699e-10	3.40974e-10	6.17054e-09	-6.3783e-14	3.49677e-07	1.21728e-10	0.0176464	-1.82406e-07	0.000725524	0.000348115
2022-03-15 10:10:20	1635529	5.02712e-09	-3.10418e-11	3.36205e-07	1.43813e-10	3.04116e-10	3.25757e-09	-6.20836e-14	3.34524e-07	1.08569e-10	0.00973794	-1.85588e-07	0.000429903	0.000324549
2022-03-15 10:10:33	1648472	3.23901e-09	-4.09932e-11	3.33338e-07	8.95581e-11	2.91831e-10	2.09888e-09	-8.19864e-14	3.31671e-07	1.04184e-10	0.00632819	-2.47192e-07	0.000270021	0.000314117
2022-03-15 10:10:46	1661415	2.13737e-09	-5.33199e-11	3.40953e-07	4.71816e-11	2.63297e-10	1.38502e-09	-1.0664e-13	3.39248e-07	9.3997e-11	0.0040826	-3.14342e-07	0.000139077	0.000277074
2022-03-15 10:10:59	1674359	1.48399e-09	-4.01332e-11	3.56093e-07	2.46927e-11	2.42419e-10	9.61626e-10	-8.02664e-14	3.54313e-07	8.65436e-11	0.00271406	-2.26541e-07	6.96919e-05	0.000244258
2022-03-15 10:11:12	1687300	1.02278e-09	-4.86513e-11	3.68724e-07	1.24914e-11	2.29236e-10	6.62761e-10	-9.73026e-14	3.6688e-07	8.18373e-11	0.00180648	-2.65216e-07	3.40476e-05	0.000223062
2022-03-15 10:11:26	1701284	6.72185e-10	-4.79551e-11	3.7813e-07	-2.44132e-11	2.16259e-10	4.35576e-10	-9.59102e-14	3.76239e-07	7.72045e-11	0.00115771	-2.54918e-07	-6.48874e-05	0.0002052
2022-03-15 10:11:41	1716437	4.53359e-10	-3.24342e-11	3.81445e-07	-2.26394e-11	2.12696e-10	2.93777e-10	-6.48684e-14	3.79538e-07	7.59325e-11	0.000774038	-1.70914e-07	-5.96499e-05	0.000200066
2022-03-15 10:11:56	1731591	3.17554e-10	-4.81599e-11	2.78872e-07	-2.38004e-11	2.49299e-10	2.05775e-10	-9.63198e-14	2.77478e-07	8.89997e-11	0.000741591	-3.47126e-07	-8.57741e-05	0.000320746
2022-03-15 10:12:11	1746744	2.36951e-10	-5.63913e-11	1.57039e-07	-4.06994e-11	2.71406e-10	1.53544e-10	-1.12783e-13	1.56254e-07	9.68919e-11	0.000982659	-7.21791e-07	-0.00026047	0.000620093
2022-03-15 10:12:26	1761896	1.98143e-10	-4.19453e-11	8.65367e-08	-4.71386e-11	2.77495e-10	1.28397e-10	-8.38906e-14	8.6104e-08	9.90657e-11	0.00149118	-9.74294e-07	-0.000547461	0.00115054
2022-03-15 10:12:42	1777049	1.49973e-10	-4.80166e-11	4.72557e-08	-5.52549e-11	2.56601e-10	9.71825e-11	-9.60332e-14	4.70194e-08	9.16066e-11	0.00206686	-2.04242e-06	-0.00117515	0.00194827
2022-03-15 10:12:57	1792712	1.30902e-10	-5.13337e-11	2.76621e-08	-4.89661e-11	2.75514e-10	8.48245e-11	-1.02667e-13	2.75238e-08	9.83585e-11	0.00308186	-3.73013e-06	-0.00177905	0.00357358
2022-03-15 10:13:13	1808116	1.09219e-10	-4.68699e-11	1.75863e-08	-5.66094e-11	2.48386e-10	7.07739e-11	-9.37398e-14	1.74984e-08	8.86738e-11	0.0040446	-5.35706e-06	-0.00323512	0.00506755
2022-03-15 10:13:28	1823519	8.71716e-11	-5.0187e-11	1.22902e-08	-4.86544e-11	2.62291e-10	5.64872e-11	-1.00374e-13	1.22287e-08	9.36379e-11	0.00461921	-8.20804e-06	-0.00397869	0.00765719
2022-03-15 10:13:43	1838922	8.50108e-11	-5.12006e-11	9.50525e-09	-5.61471e-11	2.48861e-10	5.5087e-11	-1.02401e-13	9.45772e-09	8.88434e-11	0.00582455	-1.08273e-05	-0.00593664	0.00939374
2022-03-15 10:13:59	1854326	7.37018e-11	-4.17099e-11	8.02548e-09	-4.67946e-11	2.4738e-10	4.77588e-11	-8.34198e-14	7.98535e-09	8.83147e-11	0.0059808	-1.04466e-05	-0.00586005	0.0110596
2022-03-15 10:14:14	1869729	6.36184e-11	-4.55594e-11	7.13006e-09	-6.53706e-11	2.52778e-10	4.12247e-11	-9.11188e-14	7.09441e-09	9.02417e-11	0.00581087	-1.28437e-05	-0.00921438	0.0127201
2022-03-15 10:14:31	1886172	4.49779e-11	-4.12082e-11	6.67131e-09	-4.62571e-11	2.44401e-10	2.91457e-11	-8.24164e-14	6.63795e-09	8.72512e-11	0.00439076	-1.24159e-05	-0.00696858	0.0131443
2022-03-15 10:14:47	1902106	4.08499e-11	-4.67572e-11	6.42085e-09	-4.51499e-11	2.52156e-10	2.64707e-11	-9.35144e-14	6.38875e-09	9.00197e-11	0.00414334	-1.46374e-05	-0.0070671	0.0140904
2022-03-15 10:15:03	1918039	4.62679e-11	-4.16075e-11	6.23418e-09	-5.94796e-11	2.30188e-10	2.99816e-11	-8.3215e-14	6.20301e-09	8.21771e-11	0.0048334	-1.34153e-05	-0.00958883	0.0132479
2022-03-15 10:15:18	1933971	3.07127e-11	-4.64604e-11	6.11935e-09	-5.87379e-11	2.24567e-10	1.99018e-11	-9.29208e-14	6.08875e-09	8.01704e-11	0.00326862	-1.52611e-05	-0.00964695	0.013167
2022-03-15 10:15:34	1949904	3.32496e-11	-4.14334e-11	6.06548e-09	-5.97699e-11	2.20896e-10	2.15457e-11	-8.28668e-14	6.03515e-09	7.88599e-11	0.00357004	-1.37307e-05	-0.00990363	0.0130668
2022-03-15 10:15:50	1965837	1.28784e-11	-4.80985e-11	6.00238e-09	-7.70128e-11	2.38703e-10	8.3452e-12	-9.6197e-14	5.97237e-09	8.5217e-11	0.0013973	-1.6107e-05	-0.0128949	0.0142685
2022-03-15 10:16:06	1981771	2.58429e-11	-4.09728e-11	5.9789e-09	-6.77141e-11	2.34925e-10	1.67462e-11	-8.19456e-14	5.94901e-09	8.38682e-11	0.00281496	-1.37747e-05	-0.0113824	0.0140979
2022-03-15 10:16:22	1997704	1.33837e-11	-4.26313e-11	5.91887e-09	-6.45644e-11	2.25174e-10	8.67264e-12	-8.52626e-14	5.88928e-09	8.03871e-11	0.00147262	-1.44776e-05	-0.010963	0.0136497
2022-03-15 10:16:38	2013637	7.86898e-12	-4.5283e-11	5.87826e-09	-6.38656e-11	2.05209e-10	5.0991e-12	-9.0566e-14	5.84887e-09	7.32596e-11	0.000871809	-1.54844e-05	-0.0109193	0.0125254
2022-03-15 10:16:54	2029571	8.70748e-13	-4.39213e-11	5.88263e-09	-6.59404e-11	2.19714e-10	5.64245e-13	-8.78426e-14	5.85322e-09	7.84379e-11	9.63991e-05	-1.50076e-05	-0.0112657	0.0134008
2022-03-15 10:17:10	2045504	1.25237e-11	-4.73101e-11	5.83376e-09	-5.87379e-11	2.05494e-10	8.11536e-12	-9.46202e-14	5.80459e-09	7.33614e-11	0.00139809	-1.63009e-05	-0.0101192	0.0126385
2022-03-15 10:17:26	2061436	8.39573e-12	-4.53444e-11	5.80693e-09	-6.28659e-11	2.12404e-10	5.44043e-12	-9.06888e-14	5.7779e-09	7.58282e-11	0.000941594	-1.56958e-05	-0.0108804	0.0131238
2022-03-15 10:17:42	2077369	3.50449e-12	-3.86077e-11	5.80618e-09	-7.15303e-11	2.04441e-10	2.27091e-12	-7.72154e-14	5.77715e-09	7.29854e-11	0.000393085	-1.33657e-05	-0.0123816	0.0126335
2022-03-15 10:17:58	2093301	2.62299e-12	-4.5928e-11	5.7791e-09	-5.52656e-11	2.14661e-10	1.6997e-12	-9.1856e-14	5.7502e-09	7.6634e-11	0.000295589	-1.59744e-05	-0.00961107	0.0133272
2022-03-15 10:18:14	2109234	-3.69799e-12	-5.11596e-11	5.78319e-09	-6.78968e-11	2.17311e-10	-2.3963e-12	-1.02319e-13	5.75427e-09	7.758e-11	-0.000416438	-1.77814e-05	-0.0117994	0.0134822
2022-03-15 10:18:30	2125167	-1.01479e-11	-4.5539e-11	5.75958e-09	-6.77141e-11	2.13541e-10	-6.57584e-12	-9.1078e-14	5.73078e-09	7.62341e-11	-0.00114746	-1.58928e-05	-0.0118159	0.0133026
2022-03-15 10:18:46	2141101	-6.77248e-13	-4.82725e-11	5.75545e-09	-7.20033e-11	2.18885e-10	-4.38857e-13	-9.6545e-14	5.72667e-09	7.81419e-11	-7.66338e-05	-1.68588e-05	-0.0125733	0.0136453
2022-03-15 10:19:02	2157034	-2.36069e-11	-4.46175e-11	5.72949e-09	-6.30379e-11	2.11129e-10	-1.52973e-11	-8.9235e-14	5.70084e-09	7.53731e-11	-0.00268334	-1.56529e-05	-0.0110576	0.0132214
2022-03-15 10:19:17	2172967	-8.54623e-12	-5.58282e-11	5.72663e-09	-6.76281e-11	2.13195e-10	-5.53796e-12	-1.11656e-13	5.698e-09	7.61106e-11	-0.000971913	-1.95957e-05	-0.0118687	0.0133574
2022-03-15 10:19:33	2188900	-1.51574e-11	-4.83237e-11	5.73056e-09	-8.30113e-11	2.03696e-10	-9.822e-12	-9.66474e-14	5.70191e-09	7.27195e-11	-0.00172258	-1.695e-05	-0.0145585	0.0127535
2022-03-15 10:19:49	2204834	-1.60389e-11	-4.36653e-11	5.6953e-09	-7.22506e-11	2.13901e-10	-1.03932e-11	-8.73306e-14	5.66682e-09	7.63627e-11	-0.00183404	-1.54109e-05	-0.0127498	0.0134754
2022-03-15 10:20:05	2220766	-2.54774e-12	-4.6317e-11	5.70476e-09	-6.30916e-11	2.02637e-10	-1.65094e-12	-9.2634e-14	5.67624e-09	7.23414e-11	-0.00029085	-1.63196e-05	-0.011115	0.0127446
2022-03-15 10:20:21	2236699	-1.99412e-11	-5.89713e-11	5.6757e-09	-8.35596e-11	1.96878e-10	-1.29219e-11	-1.17943e-13	5.64732e-09	7.02854e-11	-0.00228815	-2.08847e-05	-0.0147963	0.0124458
2022-03-15 10:20:37	2252631	-1.02554e-11	-4.44639e-11	5.65632e-09	-7.57766e-11	2.00717e-10	-6.6455e-12	-8.89278e-14	5.62804e-09	7.1656e-11	-0.00118078	-1.58009e-05	-0.0134641	0.012732
2022-03-15 10:20:53	2268564	-1.63184e-11	-4.67777e-11	5.69327e-09	-8.13236e-11	2.01209e-10	-1.05743e-11	-9.35554e-14	5.6648e-09	7.18316e-11	-0.00186667	-1.65152e-05	-0.0143559	0.0126803
2022-03-15 10:21:09	2284496	-2.00164e-11	-5.18866e-11	5.67672e-09	-6.75098e-11	1.86381e-10	-1.29706e-11	-1.03773e-13	5.64834e-09	6.6538e-11	-0.00229636	-1.83723e-05	-0.0119522	0.0117801
2022-03-15 10:21:25	2300429	-1.76514e-11	-4.57744e-11	5.70004e-09	-6.47793e-11	1.96341e-10	-1.14381e-11	-9.15488e-14	5.67154e-09	7.00937e-11	-0.00201676	-1.61418e-05	-0.0114218	0.0123589
2022-03-15 10:21:41	2316362	-2.11667e-11	-4.32661e-11	5.65448e-09	-7.33578e-11	1.99089e-10	-1.3716e-11	-8.65322e-14	5.62621e-09	7.10748e-11	-0.00243788	-1.53802e-05	-0.0130386	0.0126328
2022-03-15 10:21:57	2332296	-1.11047e-11	-4.37472e-11	5.65097e-09	-6.97243e-11	1.93868e-10	-7.19585e-12	-8.74944e-14	5.62272e-09	6.92109e-11	-0.00127978	-1.55609e-05	-0.0124005	0.0123092
2022-03-15 10:22:13	2348229	-1.92962e-11	-4.97058e-11	5.64364e-09	-7.60453e-11	1.88324e-10	-1.25039e-11	-9.94116e-14	5.61542e-09	6.72317e-11	-0.00222671	-1.77033e-05	-0.0135422	0.0119727
2022-03-15 10:22:29	2364161	-2.96269e-11	-3.98466e-11	5.62192e-09	-8.44411e-11	1.90904e-10	-1.91982e-11	-7.96932e-14	5.59381e-09	6.81527e-11	-0.00343205	-1.42467e-05	-0.0150955	0.0121836
2022-03-15 10:22:45	2380094	-1.80922e-11	-5.11494e-11	5.62693e-09	-7.68731e-11	1.97838e-10	-1.17237e-11	-1.02299e-13	5.5988e-09	7.06282e-11	-0.00209398	-1.82716e-05	-0.0137303	0.0126149
2022-03-15 10:23:01	2396026	-3.83344e-11	-4.9368e-11	5.63959e-09	-7.80663e-11	1.74418e-10	-2.48407e-11	-9.8736e-14	5.61139e-09	6.22672e-11	-0.00442683	-1.75956e-05	-0.0139121	0.0110966
2022-03-15 10:23:16	2411959	-3.20994e-11	-3.66728e-11	5.62239e-09	-7.90661e-11	1.84776e-10	-2.08004e-11	-7.33456e-14	5.59428e-09	6.5965e-11	-0.00371816	-1.31108e-05	-0.0141334	0.0117915
2022-03-15 10:23:32	2427891	-2.86057e-11	-5.0269e-11	5.60345e-09	-7.79266e-11	1.91219e-10	-1.85365e-11	-1.00538e-13	5.57543e-09	6.82652e-11	-0.00332467	-1.80323e-05	-0.0139768	0.0122439
2022-03-15 10:23:48	2443824	-2.65524e-11	-4.08191e-11	5.60422e-09	-7.78728e-11	1.91779e-10	-1.7206e-11	-8.16382e-14	5.5762e-09	6.84651e-11	-0.00308561	-1.46405e-05	-0.0139652	0.0122781
2022-03-15 10:24:04	2459756	-1.70924e-11	-3.98977e-11	5.60134e-09	-8.27533e-11	1.931e-10	-1.10759e-11	-7.97954e-14	5.57333e-09	6.89367e-11	-0.0019873	-1.43174e-05	-0.0148481	0.012369
2022-03-15 10:24:20	2475689	-2.64772e-11	-5.82239e-11	5.59987e-09	-7.87758e-11	2.03013e-10	-1.71572e-11	-1.16448e-13	5.57187e-09	7.24756e-11	-0.00307926	-2.08992e-05	-0.0141381	0.0130074
2022-03-15 10:24:36	2491621	-3.20779e-11	-4.0727e-11	5.60613e-09	-6.90148e-11	1.93161e-10	-2.07865e-11	-8.1454e-14	5.5781e-09	6.89585e-11	-0.00372644	-1.46025e-05	-0.0123725	0.0123624
2022-03-15 10:24:52	2507554	-2.37789e-11	-5.45996e-11	5.59494e-09	-7.41963e-11	1.98053e-10	-1.54087e-11	-1.09199e-13	5.56697e-09	7.07049e-11	-0.00276789	-1.96156e-05	-0.013328	0.0127008
2022-03-15 10:25:08	2523486	-3.92051e-11	-5.0269e-11	5.38505e-09	-8.25813e-11	1.84101e-10	-2.54049e-11	-1.00538e-13	5.35812e-09	6.57241e-11	-0.00474138	-1.87637e-05	-0.0154124	0.0122662
2022-03-15 10:25:24	2539419	-2.92829e-11	-5.54085e-11	5.16905e-09	-6.98211e-11	1.82458e-10	-1.89753e-11	-1.10817e-13	5.1432e-09	6.51375e-11	-0.0036894	-2.15463e-05	-0.0135754	0.0126648
2022-03-15 10:25:40	2555351	-2.40584e-11	-5.02996e-11	5.2277e-09	-7.38738e-11	1.93607e-10	-1.55898e-11	-1.00599e-13	5.20156e-09	6.91177e-11	-0.00299715	-1.93402e-05	-0.0142022	0.0132879
2022-03-15 10:25:56	2571284	-2.17472e-11	-5.59613e-11	5.47303e-09	-7.65506e-11	1.91756e-10	-1.40922e-11	-1.11923e-13	5.44566e-09	6.84569e-11	-0.00258778	-2.05526e-05	-0.0140572	0.0125709
2022-03-15 10:26:12	2587217	-2.95947e-11	-4.54877e-11	5.5713e-09	-7.11111e-11	1.80984e-10	-1.91774e-11	-9.09754e-14	5.54344e-09	6.46113e-11	-0.00345947	-1.64114e-05	-0.012828	0.0116554
2022-03-15 10:26:28	2603150	-4.82351e-11	-5.68828e-11	5.90215e-09	-7.60991e-11	1.91011e-10	-3.12563e-11	-1.13766e-13	5.87264e-09	6.81909e-11	-0.00532237	-1.93721e-05	-0.0129582	0.0116116
2022-03-15 10:26:44	2619084	-9.73948e-12	-4.60815e-11	7.30063e-08	-6.31346e-11	1.82174e-10	-6.31118e-12	-9.2163e-14	7.26413e-08	6.50361e-11	-8.68815e-05	-1.26874e-06	-0.000869129	0.000895305
2022-03-15 10:27:00	2635527	-2.09409e-11	-4.60304e-11	2.68033e-07	-6.08449e-11	1.72076e-10	-1.35697e-11	-9.20608e-14	2.66693e-07	6.14311e-11	-5.08814e-05	-3.45194e-07	-0.000228146	0.000230344
2022-03-15 10:27:16	2651191	-1.88984e-11	-2.70899e-11	2.97147e-07	-7.01651e-11	1.69504e-10	-1.22462e-11	-5.41798e-14	2.95661e-07	6.05129e-11	-4.14196e-05	-1.8325e-07	-0.000237316	0.00020467
2022-03-15 10:27:31	2666344	-2.87884e-11	-6.60868e-11	3.42924e-07	-6.86171e-11	1.56289e-10	-1.86549e-11	-1.32174e-13	3.41209e-07	5.57952e-11	-5.46728e-05	-3.87368e-07	-0.0002011	0.000163522
2022-03-15 10:27:46	2681496	-3.30562e-11	-5.2593e-11	3.53405e-07	-7.04983e-11	1.43312e-10	-2.14204e-11	-1.05186e-13	3.51638e-07	5.11624e-11	-6.09161e-05	-2.99132e-07	-0.000200485	0.000145497
2022-03-15 10:28:01	2696649	-3.68831e-11	-5.51013e-11	3.86372e-07	-6.28659e-11	1.50607e-10	-2.39002e-11	-1.10203e-13	3.8444e-07	5.37667e-11	-6.2169e-05	-2.86657e-07	-0.000163526	0.000139857
2022-03-15 10:28:16	2711801	-5.48464e-11	-6.31996e-11	3.97749e-07	-7.67871e-11	1.31971e-10	-3.55405e-11	-1.26399e-13	3.9576e-07	4.71136e-11	-8.9803e-05	-3.19383e-07	-0.000194024	0.000119046
2022-03-15 10:28:31	2726954	-4.26344e-11	-6.36706e-11	3.82968e-07	-5.32661e-11	1.93269e-10	-2.76271e-11	-1.27341e-13	3.81053e-07	6.8997e-11	-7.25019e-05	-3.34182e-07	-0.000139787	0.000181069
2022-03-15 10:28:47	2742107	4.19458e-09	-4.72794e-11	3.79743e-07	2.52409e-10	2.93812e-10	2.71809e-09	-9.45588e-14	3.77844e-07	1.04891e-10	0.00719367	-2.50259e-07	0.000668024	0.000277603
2022-03-15 10:29:06	2761552	1.01519e-08	-5.47225e-11	3.46776e-07	3.46676e-10	3.56016e-10	6.57843e-09	-1.09445e-13	3.45042e-07	1.27098e-10	0.0190656	-3.17193e-07	0.00100474	0.000368354
2022-03-15 10:29:18	2773966	1.12464e-08	-4.58768e-11	3.57078e-07	3.7985e-10	3.67196e-10	7.28767e-09	-9.17536e-14	3.55293e-07	1.31089e-10	0.0205117	-2.58248e-07	0.00106912	0.000368961
2022-03-15 10:29:31	2786379	1.22535e-08	-3.85361e-11	3.61109e-07	3.99254e-10	3.91276e-10	7.94027e-09	-7.70722e-14	3.59303e-07	1.39686e-10	0.0220991	-2.14504e-07	0.00111119	0.000388768
2022-03-15 10:29:43	2798791	1.27379e-08	-4.20477e-11	3.62453e-07	4.068e-10	3.96536e-10	8.25416e-09	-8.40954e-14	3.60641e-07	1.41563e-10	0.0228875	-2.33183e-07	0.00112799	0.000392533
2022-03-15 10:29:56	2811204	1.3086e-08	-4.44537e-11	3.60841e-07	4.1296e-10	3.74652e-10	8.47973e-09	-8.89074e-14	3.59037e-07	1.33751e-10	0.023618	-2.47628e-07	0.00115019	0.000372527
2022-03-15 10:30:08	2823616	1.31451e-08	-3.61199e-11	3.58959e-07	4.12068e-10	3.88926e-10	8.51802e-09	-7.22398e-14	3.57164e-07	1.38847e-10	0.023849	-2.02259e-07	0.00115372	0.000388747
2022-03-15 10:30:21	2836029	1.32392e-08	-3.87715e-11	3.56899e-07	4.12939e-10	3.74406e-10	8.579e-09	-7.7543e-14	3.55115e-07	1.33663e-10	0.0241584	-2.18361e-07	0.00116283	0.000376394
2022-03-15 10:30:33	2848441	1.3264e-08	-4.50577e-11	3.55913e-07	4.07703e-10	3.80242e-10	8.59507e-09	-9.01154e-14	3.54133e-07	1.35746e-10	0.0242707	-2.54467e-07	0.00115127	0.00038332
2022-03-15 10:30:45	2860854	1.32681e-08	-4.18225e-11	3.56362e-07	3.91525e-10	3.562e-10	8.59773e-09	-8.3645e-14	3.5458e-07	1.27163e-10	0.0242476	-2.35899e-07	0.00110419	0.000358631
2022-03-15 10:30:58	2873266	1.12041e-08	-4.72385e-11	3.77234e-07	3.63596e-10	3.22891e-10	7.26026e-09	-9.4477e-14	3.75348e-07	1.15272e-10	0.0193427	-2.51705e-07	0.000968691	0.000307107
2022-03-15 10:31:11	2886189	6.86784e-09	-5.44256e-11	3.36295e-07	1.66699e-10	2.85688e-10	4.45036e-09	-1.08851e-13	3.34614e-07	1.01991e-10	0.0133	-3.25304e-07	0.000498184	0.000304801
2022-03-15 10:31:24	2899132	4.2808e-09	-5.37704e-11	3.33876e-07	9.01493e-11	2.74723e-10	2.77396e-09	-1.07541e-13	3.32207e-07	9.80761e-11	0.0083501	-3.23717e-07	0.000271365	0.000295226
2022-03-15 10:31:37	2912075	2.78894e-09	-5.73844e-11	3.3298e-07	4.30321e-11	2.42711e-10	1.80723e-09	-1.14769e-13	3.31315e-07	8.66478e-11	0.00545473	-3.46404e-07	0.000129883	0.000261527
2022-03-15 10:31:50	2925019	1.85283e-09	-5.9862e-11	3.44357e-07	1.76622e-11	2.34603e-10	1.20063e-09	-1.19724e-13	3.42635e-07	8.37533e-11	0.00350412	-3.49421e-07	5.15481e-05	0.000244439
2022-03-15 10:32:02	2937961	1.28113e-09	-5.26647e-11	3.58691e-07	-1.99949e-12	2.12719e-10	8.30172e-10	-1.05329e-13	3.56898e-07	7.59407e-11	0.00232608	-2.95125e-07	-5.60242e-06	0.00021278
2022-03-15 10:32:16	2951944	8.29973e-10	-5.62172e-11	3.72487e-07	-1.90597e-11	1.91288e-10	5.37823e-10	-1.12434e-13	3.70625e-07	6.82898e-11	0.00145112	-3.03365e-07	-5.14259e-05	0.000184256
2022-03-15 10:32:32	2967097	5.47679e-10	-5.38523e-11	3.8028e-07	-3.59909e-11	2.1083e-10	3.54896e-10	-1.07705e-13	3.78379e-07	7.52663e-11	0.000937939	-2.84648e-07	-9.51188e-05	0.000198918
2022-03-15 10:32:47	2982251	3.71153e-10	-5.41185e-11	3.59945e-07	-3.54104e-11	2.11705e-10	2.40507e-10	-1.08237e-13	3.58145e-07	7.55787e-11	0.000671535	-3.02215e-07	-9.88716e-05	0.000211028
2022-03-15 10:33:02	2997404	2.72458e-10	-5.29513e-11	2.24316e-07	-4.82459e-11	2.34964e-10	1.76553e-10	-1.05903e-13	2.23194e-07	8.38821e-11	0.000791027	-4.74486e-07	-0.000216161	0.000375825
2022-03-15 10:33:17	3012556	2.10979e-10	-6.00156e-11	1.23266e-07	-6.49729e-11	2.41606e-10	1.36714e-10	-1.20031e-13	1.2265e-07	8.62533e-11	0.00111467	-9.78651e-07	-0.000529744	0.00070325
2022-03-15 10:33:32	3027709	1.55143e-10	-6.37423e-11	6.61012e-08	-6.18339e-11	2.46066e-10	1.00533e-10	-1.27485e-13	6.57707e-08	8.78456e-11	0.00152853	-1.93832e-06	-0.000940144	0.00133563
2022-03-15 10:33:48	3043372	1.31063e-10	-5.49375e-11	3.74553e-08	-6.86816e-11	2.37589e-10	8.49288e-11	-1.09875e-13	3.7268e-08	8.48193e-11	0.00227887	-2.94824e-06	-0.00184291	0.00227593
2022-03-15 10:34:03	3058775	1.00103e-10	-5.17944e-11	2.26522e-08	-5.98559e-11	2.42581e-10	6.48667e-11	-1.03589e-13	2.25389e-08	8.66014e-11	0.00287799	-4.59599e-06	-0.00265567	0.0038423
2022-03-15 10:34:19	3074179	7.22076e-11	-6.07425e-11	1.49043e-08	-6.85741e-11	2.34388e-10	4.67905e-11	-1.21485e-13	1.48298e-08	8.36765e-11	0.00315517	-8.19196e-06	-0.00462408	0.00564247
2022-03-15 10:34:34	3089582	7.09821e-11	-6.29539e-11	1.08938e-08	-6.59188e-11	2.19491e-10	4.59964e-11	-1.25908e-13	1.08393e-08	7.83583e-11	0.00424347	-1.16158e-05	-0.00608145	0.00722907
2022-03-15 10:34:49	3104985	6.26724e-11	-5.1559e-11	8.73433e-09	-6.26939e-11	2.28099e-10	4.06117e-11	-1.03118e-13	8.69066e-09	8.14313e-11	0.00467303	-1.18654e-05	-0.00721394	0.00936999
2022-03-15 10:35:05	3120389	4.31074e-11	-5.47942e-11	7.61287e-09	-6.97028e-11	2.29804e-10	2.79336e-11	-1.09588e-13	7.57481e-09	8.204e-11	0.0036877	-1.44675e-05	-0.00920193	0.0108306
2022-03-15 10:35:20	3135791	4.13551e-11	-5.49477e-11	6.91228e-09	-7.62388e-11	2.42642e-10	2.67981e-11	-1.09895e-13	6.87772e-09	8.66232e-11	0.00389637	-1.59785e-05	-0.0110849	0.0125948
2022-03-15 10:35:37	3152234	3.93449e-11	-4.65832e-11	6.55184e-09	-7.27236e-11	2.36207e-10	2.54955e-11	-9.31664e-14	6.51908e-09	8.43259e-11	0.0039109	-1.42913e-05	-0.0111555	0.0129352
2022-03-15 10:35:53	3168167	1.87694e-11	-5.39239e-11	6.32089e-09	-7.93241e-11	2.05839e-10	1.21626e-11	-1.07848e-13	6.28929e-09	7.34845e-11	0.00193386	-1.71479e-05	-0.0126126	0.0116841
2022-03-15 10:36:09	3184101	1.63399e-11	-5.36372e-11	6.20421e-09	-7.32181e-11	2.23046e-10	1.05883e-11	-1.07274e-13	6.17319e-09	7.96274e-11	0.0017152	-1.73775e-05	-0.0118607	0.0128989
2022-03-15 10:36:25	3200034	1.94789e-11	-4.78937e-11	6.11267e-09	-6.93051e-11	2.10906e-10	1.26223e-11	-9.57874e-14	6.08211e-09	7.52934e-11	0.00207532	-1.5749e-05	-0.0113949	0.0123795
2022-03-15 10:36:40	3215967	1.37384e-11	-5.22347e-11	6.031e-09	-6.99823e-11	2.08649e-10	8.90248e-12	-1.04469e-13	6.00085e-09	7.44877e-11	0.00148354	-1.74091e-05	-0.0116621	0.0124129
2022-03-15 10:36:56	3231901	1.93177e-11	-6.45306e-11	5.9964e-09	-8.64298e-11	2.15406e-10	1.25179e-11	-1.29061e-13	5.96642e-09	7.68999e-11	0.00209805	-2.16313e-05	-0.014486	0.0128888
2022-03-15 10:37:12	3247834	-1.79524e-12	-4.15256e-11	5.96018e-09	-7.44113e-11	2.11168e-10	-1.16332e-12	-8.30512e-14	5.93038e-09	7.5387e-11	-0.000196162	-1.40044e-05	-0.0125475	0.012712
2022-03-15 10:37:28	3263765	-1.35772e-11	-4.5713e-11	5.91168e-09	-7.01006e-11	2.08411e-10	-8.79803e-12	-9.1426e-14	5.88212e-09	7.44027e-11	-0.00149572	-1.5543e-05	-0.0119176	0.012649
2022-03-15 10:37:44	3279699	-2.05324e-12	-5.32277e-11	5.89297e-09	-7.50563e-11	2.19084e-10	-1.3305e-12	-1.06455e-13	5.86351e-09	7.8213e-11	-0.000226912	-1.81556e-05	-0.0128006	0.0133389
2022-03-15 10:38:00	3295630	9.45998e-13	-4.93782e-11	5.89102e-09	-7.49273e-11	2.21465e-10	6.13007e-13	-9.87564e-14	5.86156e-09	7.9063e-11	0.000104581	-1.68481e-05	-0.0127828	0.0134884
2022-03-15 10:38:16	3311564	-4.29999e-12	-4.83953e-11	5.83983e-09	-8.40433e-11	2.04879e-10	-2.78639e-12	-9.67906e-14	5.81063e-09	7.31418e-11	-0.000479534	-1.66575e-05	-0.0144637	0.0125876
2022-03-15 10:38:32	3327495	-3.99899e-12	-5.30025e-11	5.81938e-09	-7.54648e-11	2.04065e-10	-2.59135e-12	-1.06005e-13	5.79028e-09	7.28512e-11	-0.000447533	-1.83074e-05	-0.013033	0.0125816
2022-03-15 10:38:48	3343429	-7.29923e-12	-4.81394e-11	5.81057e-09	-8.24093e-11	2.04149e-10	-4.7299e-12	-9.62788e-14	5.78152e-09	7.28812e-11	-0.000818107	-1.66529e-05	-0.0142539	0.0126059
2022-03-15 10:39:04	3359362	-6.17049e-12	-4.84158e-11	5.78492e-09	-7.97218e-11	1.77274e-10	-3.99848e-12	-9.68316e-14	5.756e-09	6.32868e-11	-0.000694663	-1.68227e-05	-0.0138502	0.0109949
2022-03-15 10:39:20	3375296	-1.70494e-11	-5.16409e-11	5.79091e-09	-7.52928e-11	2.08242e-10	-1.1048e-11	-1.03282e-13	5.76196e-09	7.43424e-11	-0.00191741	-1.79248e-05	-0.0130672	0.0129023
2022-03-15 10:39:36	3391229	-2.42734e-11	-4.76172e-11	5.77091e-09	-8.54623e-11	1.90727e-10	-1.57292e-11	-9.52344e-14	5.74206e-09	6.80895e-11	-0.00273929	-1.65854e-05	-0.0148836	0.011858
2022-03-15 10:39:52	3407162	-2.31769e-11	-5.66677e-11	5.74267e-09	-8.91066e-11	1.88347e-10	-1.50186e-11	-1.13335e-13	5.71396e-09	6.72399e-11	-0.00262841	-1.98348e-05	-0.0155946	0.0117677
2022-03-15 10:40:08	3423096	-1.48242e-11	-6.27287e-11	5.72455e-09	-8.22051e-11	1.93614e-10	-9.60608e-12	-1.25457e-13	5.69593e-09	6.91202e-11	-0.00168648	-2.20258e-05	-0.0144323	0.012135
2022-03-15 10:40:24	3439029	-1.66517e-11	-5.31766e-11	5.70762e-09	-7.85286e-11	1.85122e-10	-1.07903e-11	-1.06353e-13	5.67908e-09	6.60886e-11	-0.00190001	-1.87272e-05	-0.0138277	0.0116372
2022-03-15 10:40:39	3454962	-2.02314e-11	-5.86744e-11	5.71348e-09	-8.27856e-11	1.77229e-10	-1.31099e-11	-1.17349e-13	5.68491e-09	6.32708e-11	-0.00230609	-2.06421e-05	-0.0145623	0.0111296
2022-03-15 10:40:55	3470896	-2.60042e-11	-4.7648e-11	5.71194e-09	-8.73436e-11	1.7911e-10	-1.68507e-11	-9.5296e-14	5.68338e-09	6.39423e-11	-0.00296491	-1.67675e-05	-0.0153682	0.0112507
2022-03-15 10:41:11	3486829	-3.19382e-11	-5.42618e-11	5.69968e-09	-8.05066e-11	1.73174e-10	-2.0696e-11	-1.08524e-13	5.67118e-09	6.18231e-11	-0.00364932	-1.9136e-05	-0.0141957	0.0109013
2022-03-15 10:41:27	3502762	-3.46041e-11	-5.58896e-11	5.64894e-09	-8.87303e-11	1.91326e-10	-2.24235e-11	-1.11779e-13	5.6207e-09	6.83034e-11	-0.00398945	-1.98871e-05	-0.0157864	0.0121521
2022-03-15 10:41:43	3518696	-4.08069e-11	-6.15923e-11	5.68347e-09	-8.46023e-11	1.76223e-10	-2.64429e-11	-1.23185e-13	5.65505e-09	6.29116e-11	-0.00467597	-2.17831e-05	-0.0149605	0.0111248
2022-03-15 10:41:59	3534629	-2.15644e-11	-6.45408e-11	5.66856e-09	-7.02511e-11	1.7633e-10	-1.39737e-11	-1.29082e-13	5.64022e-09	6.29498e-11	-0.00247752	-2.28859e-05	-0.0124554	0.0111609
2022-03-15 10:42:15	3550562	-2.25534e-11	-6.04047e-11	5.67807e-09	-7.72708e-11	1.86512e-10	-1.46146e-11	-1.20809e-13	5.64968e-09	6.65848e-11	-0.0025868	-2.13834e-05	-0.013677	0.0117856
2022-03-15 10:42:31	3566496	-2.62837e-11	-6.4377e-11	5.66305e-09	-7.93456e-11	1.87126e-10	-1.70318e-11	-1.28754e-13	5.63473e-09	6.6804e-11	-0.00302265	-2.28501e-05	-0.0140815	0.0118557
2022-03-15 10:42:47	3582429	-4.01511e-11	-5.3842e-11	5.65562e-09	-8.58816e-11	1.82304e-10	-2.60179e-11	-1.07684e-13	5.62734e-09	6.50825e-11	-0.00462348	-1.91359e-05	-0.0152615	0.0115654
2022-03-15 10:43:03	3598361	-1.98874e-11	-5.0658e-11	5.6313e-09	-7.70343e-11	1.81137e-10	-1.2887e-11	-1.01316e-13	5.60314e-09	6.46659e-11	-0.00229997	-1.8082e-05	-0.0137484	0.011541
2022-03-15 10:43:19	3614294	-2.54989e-11	-5.24496e-11	5.63641e-09	-6.71013e-11	1.83333e-10	-1.65233e-11	-1.04899e-13	5.60823e-09	6.54499e-11	-0.00294626	-1.87045e-05	-0.0119648	0.0116703
2022-03-15 10:43:35	3630227	-1.87372e-11	-6.49298e-11	5.65082e-09	-8.54301e-11	1.87379e-10	-1.21417e-11	-1.2986e-13	5.62257e-09	6.68943e-11	-0.00215946	-2.30961e-05	-0.0151941	0.0118975
2022-03-15 10:43:51	3646161	-3.09062e-11	-5.17228e-11	5.62815e-09	-7.77976e-11	1.80008e-10	-2.00272e-11	-1.03446e-13	5.60001e-09	6.42629e-11	-0.00357628	-1.84724e-05	-0.0138924	0.0114755
2022-03-15 10:44:07	3662094	-2.70362e-11	-5.0228e-11	5.63343e-09	-9.14286e-11	1.74694e-10	-1.75195e-11	-1.00456e-13	5.60526e-09	6.23658e-11	-0.00312554	-1.79217e-05	-0.0163112	0.0111263
2022-03-15 10:44:23	3678027	-3.30669e-11	-5.30947e-11	5.60492e-09	-8.00013e-11	1.95557e-10	-2.14274e-11	-1.06189e-13	5.5769e-09	6.98138e-11	-0.00384216	-1.9041e-05	-0.0143451	0.0125184
2022-03-15 10:44:38	3693960	-3.71949e-11	-5.56747e-11	5.61049e-09	-8.05388e-11	1.74111e-10	-2.41023e-11	-1.11349e-13	5.58244e-09	6.21576e-11	-0.00431752	-1.99464e-05	-0.0144272	0.0111345
2022-03-15 10:44:54	3709894	-2.46389e-11	-5.06887e-11	5.61976e-09	-9.17081e-11	1.92762e-10	-1.5966e-11	-1.01377e-13	5.59166e-09	6.8816e-11	-0.00285532	-1.81301e-05	-0.0164009	0.0123069
2022-03-15 10:45:10	3725827	-3.20242e-11	-5.31868e-11	5.61072e-09	-7.95928e-11	1.80492e-10	-2.07517e-11	-1.06374e-13	5.58267e-09	6.44356e-11	-0.00371716	-1.90543e-05	-0.0142571	0.0115421
2022-03-15 10:45:26	3741761	-3.30024e-11	-5.22551e-11	5.61557e-09	-8.03883e-11	1.82941e-10	-2.13856e-11	-1.0451e-13	5.58749e-09	6.53099e-11	-0.0038274	-1.87043e-05	-0.0143872	0.0116886
2022-03-15 10:45:42	3757694	-4.35911e-11	-5.58794e-11	5.61973e-09	-7.55723e-11	1.74326e-10	-2.8247e-11	-1.11759e-13	5.59163e-09	6.22344e-11	-0.00505166	-1.99868e-05	-0.0135153	0.0111299
2022-03-15 10:45:58	3773625	-3.41741e-11	-4.58153e-11	6.17837e-09	-7.62173e-11	1.65496e-10	-2.21448e-11	-9.16306e-14	6.14748e-09	5.90821e-11	-0.00360226	-1.49054e-05	-0.0123981	0.00961078
2022-03-15 10:46:14	3789559	-3.18414e-11	-5.08525e-11	5.26448e-09	-7.89801e-11	1.68997e-10	-2.06332e-11	-1.01705e-13	5.23816e-09	6.03319e-11	-0.00393902	-1.94162e-05	-0.0150778	0.0115178
2022-03-15 10:46:30	3805491	-3.11534e-11	-5.00539e-11	5.15917e-09	-7.09068e-11	1.79217e-10	-2.01874e-11	-1.00108e-13	5.13337e-09	6.39805e-11	-0.00393258	-1.95014e-05	-0.0138129	0.0124636
2022-03-15 10:46:46	3821424	-2.48862e-11	-4.65115e-11	5.31842e-09	-8.51721e-11	1.77912e-10	-1.61263e-11	-9.3023e-14	5.29183e-09	6.35146e-11	-0.00304739	-1.75786e-05	-0.016095	0.0120024
2022-03-15 10:47:02	3837357	-3.74959e-11	-5.41287e-11	5.52768e-09	-7.93241e-11	1.88278e-10	-2.42973e-11	-1.08257e-13	5.50004e-09	6.72152e-11	-0.00441767	-1.9683e-05	-0.0144225	0.0122209
2022-03-15 10:47:18	3853291	-3.68401e-11	-5.92785e-11	5.61077e-09	-8.38498e-11	1.8675e-10	-2.38724e-11	-1.18557e-13	5.58272e-09	6.66697e-11	-0.00427612	-2.12364e-05	-0.0150195	0.0119422
2022-03-15 10:47:34	3869224	-3.43246e-11	-6.55953e-11	1.47011e-08	-8.34521e-11	1.80937e-10	-2.22423e-11	-1.31191e-13	1.46276e-08	6.45945e-11	-0.00152057	-8.96871e-06	-0.00570511	0.00441594
2022-03-15 10:47:50	3885669	-1.73612e-11	-5.71285e-11	1.21922e-07	-7.35621e-11	1.47604e-10	-1.12501e-11	-1.14257e-13	1.21312e-07	5.26946e-11	-9.27363e-05	-9.41841e-07	-0.000606386	0.000434371
2022-03-15 10:48:06	3901332	-1.20937e-11	-5.61251e-11	2.48414e-07	-7.04016e-11	1.588e-10	-7.83672e-12	-1.1225e-13	2.47172e-07	5.66916e-11	-3.17055e-05	-4.54138e-07	-0.000284828	0.000229361
2022-03-15 10:48:21	3916486	-3.19596e-11	-5.88382e-11	3.08793e-07	-7.06918e-11	1.57817e-10	-2.07098e-11	-1.17676e-13	3.07249e-07	5.63407e-11	-6.7404e-05	-3.83e-07	-0.00023008	0.000183371
2022-03-15 10:48:36	3931639	-2.12419e-11	-5.83366e-11	3.50001e-07	-7.10466e-11	1.53962e-10	-1.37648e-11	-1.16673e-13	3.48251e-07	5.49644e-11	-3.95254e-05	-3.35026e-07	-0.00020401	0.00015783
2022-03-15 10:48:51	3946791	-3.54426e-11	-5.12723e-11	3.81624e-07	-7.33471e-11	1.34251e-10	-2.29668e-11	-1.02545e-13	3.79716e-07	4.79276e-11	-6.04842e-05	-2.70056e-07	-0.000193163	0.00012622
2022-03-15 10:49:06	3961944	-3.58726e-11	-6.10496e-11	3.73651e-07	-7.63248e-11	1.40095e-10	-2.32454e-11	-1.22099e-13	3.71783e-07	5.00139e-11	-6.25243e-05	-3.28415e-07	-0.000205294	0.000134525
2022-03-15 10:49:22	3977096	-4.73536e-11	-6.22065e-11	3.95868e-07	-7.45188e-11	1.36256e-10	-3.06851e-11	-1.24413e-13	3.93889e-07	4.86434e-11	-7.79031e-05	-3.15858e-07	-0.000189187	0.000123495
2022-03-15 10:49:37	3992249	9.22778e-11	-5.40877e-11	3.98018e-07	1.50714e-11	2.09179e-10	5.9796e-11	-1.08175e-13	3.96028e-07	7.46769e-11	0.000150989	-2.73151e-07	3.80564e-05	0.000188565
2022-03-15 10:49:55	4010652	6.7142e-09	-4.54366e-11	3.62722e-07	2.88809e-10	3.10068e-10	4.3508e-09	-9.08732e-14	3.60908e-07	1.10694e-10	0.0120551	-2.5179e-07	0.000800228	0.00030671
2022-03-15 10:50:08	4023594	9.27912e-09	-5.2163e-11	3.49912e-07	3.19188e-10	3.27951e-10	6.01287e-09	-1.04326e-13	3.48162e-07	1.17079e-10	0.0172703	-2.99647e-07	0.000916779	0.000336276
2022-03-15 10:50:22	4037576	1.11376e-08	-4.75866e-11	3.5663e-07	3.47933e-10	3.39292e-10	7.21716e-09	-9.51732e-14	3.54847e-07	1.21127e-10	0.0203388	-2.68209e-07	0.000980516	0.000341351
2022-03-15 10:50:34	4049989	1.20143e-08	-4.67368e-11	3.60124e-07	3.65961e-10	3.52538e-10	7.78527e-09	-9.34736e-14	3.58323e-07	1.25856e-10	0.0217269	-2.60864e-07	0.00102131	0.000351236
2022-03-15 10:50:47	4062400	1.26265e-08	-5.74561e-11	3.60034e-07	3.82667e-10	3.61544e-10	8.18197e-09	-1.14912e-13	3.58234e-07	1.29071e-10	0.0228398	-3.20774e-07	0.0010682	0.000360299
2022-03-15 10:50:59	4074814	1.27615e-08	-4.14642e-11	3.57705e-07	3.85687e-10	3.54204e-10	8.26945e-09	-8.29284e-14	3.55916e-07	1.26451e-10	0.0232342	-2.33e-07	0.00108364	0.000355282
2022-03-15 10:51:12	4087226	1.29758e-08	-5.00232e-11	3.55376e-07	3.8186e-10	3.65291e-10	8.40832e-09	-1.00046e-13	3.53599e-07	1.30409e-10	0.0237792	-2.82937e-07	0.00107992	0.000368804
2022-03-15 10:51:24	4099639	1.28723e-08	-3.58537e-11	3.53226e-07	3.81946e-10	3.42939e-10	8.34125e-09	-7.17074e-14	3.5146e-07	1.22429e-10	0.0237332	-2.04027e-07	0.00108674	0.000348345
2022-03-15 10:51:37	4112051	1.31404e-08	-4.74228e-11	3.5233e-07	3.93847e-10	3.52637e-10	8.51498e-09	-9.48456e-14	3.50568e-07	1.25891e-10	0.0242891	-2.70548e-07	0.00112345	0.000359107
2022-03-15 10:51:49	4124464	1.27447e-08	-4.78118e-11	3.54212e-07	3.66864e-10	3.24404e-10	8.25857e-09	-9.56236e-14	3.52441e-07	1.15812e-10	0.0234325	-2.71318e-07	0.00104092	0.0003286
2022-03-15 10:52:01	4136876	1.0629e-08	-5.20094e-11	3.96316e-07	3.01193e-10	2.91478e-10	6.88759e-09	-1.04019e-13	3.94334e-07	1.04058e-10	0.0174664	-2.63783e-07	0.000763801	0.000263882
2022-03-15 10:52:14	4149799	5.93614e-09	-6.1152e-11	3.32084e-07	1.42802e-10	2.65294e-10	3.84662e-09	-1.22304e-13	3.30424e-07	9.471e-11	0.0116415	-3.70143e-07	0.000432179	0.000286632
2022-03-15 10:52:27	4162742	3.79472e-09	-5.16306e-11	3.30741e-07	6.49944e-11	2.49008e-10	2.45898e-09	-1.03261e-13	3.29087e-07	8.88959e-11	0.00747212	-3.13781e-07	0.000197499	0.000270128
2022-03-15 10:52:40	4175686	2.46588e-09	-6.05991e-11	3.31637e-07	3.82054e-11	2.26594e-10	1.59789e-09	-1.21198e-13	3.29979e-07	8.08941e-11	0.0048424	-3.67291e-07	0.000115781	0.000245149
2022-03-15 10:52:53	4188629	1.64989e-09	-6.41312e-11	3.44716e-07	-1.91349e-12	2.10009e-10	1.06913e-09	-1.28262e-13	3.42992e-07	7.49732e-11	0.00311706	-3.73951e-07	-5.57881e-06	0.000218586
2022-03-15 10:53:06	4201570	1.14968e-09	-6.9967e-11	3.58243e-07	-2.89819e-11	2.17334e-10	7.44993e-10	-1.39934e-13	3.56452e-07	7.75882e-11	0.00209002	-3.92575e-07	-8.13066e-05	0.000217668
2022-03-15 10:53:20	4215554	7.3461e-10	-6.0763e-11	3.71501e-07	-4.19786e-11	1.75654e-10	4.76027e-10	-1.21526e-13	3.69643e-07	6.27085e-11	0.0012878	-3.28765e-07	-0.000113565	0.000169646
2022-03-15 10:53:35	4230707	4.90091e-10	-7.25777e-11	3.77413e-07	-4.70741e-11	1.89092e-10	3.17579e-10	-1.45155e-13	3.75526e-07	6.75058e-11	0.000845691	-3.86539e-07	-0.000125355	0.000179763
2022-03-15 10:53:50	4245861	3.29153e-10	-6.94141e-11	3.30383e-07	-6.40806e-11	2.49369e-10	2.13291e-10	-1.38828e-13	3.28731e-07	8.90247e-11	0.000648832	-4.22315e-07	-0.000194933	0.000270813
2022-03-15 10:54:06	4261014	2.59214e-10	-6.85746e-11	1.95112e-07	-6.16619e-11	2.18094e-10	1.67971e-10	-1.37149e-13	1.94136e-07	7.78596e-11	0.00086522	-7.06458e-07	-0.000317621	0.000401056
2022-03-15 10:54:21	4276166	1.80535e-10	-5.47328e-11	1.0741e-07	-6.48761e-11	2.29228e-10	1.16987e-10	-1.09466e-13	1.06873e-07	8.18344e-11	0.00109463	-1.02426e-06	-0.000607039	0.000765717
2022-03-15 10:54:36	4291319	1.37524e-10	-7.03253e-11	5.80118e-08	-6.40484e-11	2.50397e-10	8.91156e-11	-1.40651e-13	5.77217e-08	8.93917e-11	0.00154388	-2.4367e-06	-0.00110961	0.00154867
2022-03-15 10:54:51	4306982	1.15465e-10	-5.76404e-11	3.3275e-08	-7.01866e-11	2.44754e-10	7.48213e-11	-1.15281e-13	3.31086e-08	8.73772e-11	0.00225987	-3.4819e-06	-0.00211989	0.00263911
2022-03-15 10:55:07	4322386	9.9921e-11	-4.87537e-11	2.04596e-08	-7.16271e-11	2.42281e-10	6.47488e-11	-9.75074e-14	2.03573e-08	8.64943e-11	0.00318062	-4.7898e-06	-0.0035185	0.00424881
2022-03-15 10:55:22	4337789	6.68541e-11	-5.68315e-11	1.38456e-08	-7.44543e-11	2.39018e-10	4.33215e-11	-1.13663e-13	1.37764e-08	8.53294e-11	0.00314462	-8.25058e-06	-0.00540449	0.0061939
2022-03-15 10:55:38	4353191	6.80258e-11	-4.8508e-11	1.03278e-08	-7.18636e-11	2.24859e-10	4.40807e-11	-9.7016e-14	1.02762e-08	8.02747e-11	0.00428961	-9.44088e-06	-0.00699323	0.00781174
2022-03-15 10:55:53	4368594	4.21829e-11	-6.85644e-11	8.51142e-09	-8.03776e-11	2.24414e-10	2.73345e-11	-1.37129e-13	8.46886e-09	8.01158e-11	0.00322765	-1.61921e-05	-0.00949096	0.00946004
2022-03-15 10:56:08	4383997	5.23094e-11	-4.7822e-11	7.44481e-09	-7.42823e-11	2.16029e-10	3.38965e-11	-9.5644e-14	7.40759e-09	7.71224e-11	0.00457592	-1.29116e-05	-0.0100279	0.0104113
2022-03-15 10:56:25	4400441	3.12502e-11	-5.24291e-11	6.88489e-09	-7.23688e-11	2.25004e-10	2.02501e-11	-1.04858e-13	6.85047e-09	8.03264e-11	0.00295602	-1.53067e-05	-0.0105641	0.0117257
2022-03-15 10:56:41	4416374	2.92507e-11	-4.91018e-11	6.54552e-09	-7.65506e-11	2.22977e-10	1.89545e-11	-9.82036e-14	6.51279e-09	7.96028e-11	0.00291034	-1.50786e-05	-0.0117539	0.0122225
2022-03-15 10:56:57	4432307	2.56709e-11	-4.65525e-11	6.34528e-09	-8.94721e-11	2.27784e-10	1.66347e-11	-9.3105e-14	6.31355e-09	8.13189e-11	0.00263477	-1.47468e-05	-0.0141714	0.0128801
2022-03-15 10:57:13	4448241	1.91672e-11	-5.9217e-11	6.22458e-09	-8.61718e-11	2.20958e-10	1.24203e-11	-1.18434e-13	6.19346e-09	7.8882e-11	0.0020054	-1.91224e-05	-0.0139134	0.0127363
2022-03-15 10:57:29	4464174	7.54648e-12	-5.18456e-11	6.13468e-09	-7.78298e-11	2.04111e-10	4.89012e-12	-1.03691e-13	6.10401e-09	7.28676e-11	0.000801133	-1.69874e-05	-0.0127506	0.0119377
2022-03-15 10:57:45	4480107	2.71974e-12	-5.57872e-11	6.06892e-09	-8.10441e-11	1.91411e-10	1.76239e-12	-1.11574e-13	6.03858e-09	6.83337e-11	0.000291856	-1.84769e-05	-0.0134211	0.0113162
2022-03-15 10:58:01	4496041	-3.13899e-12	-5.70158e-11	6.01298e-09	-7.77976e-11	1.8675e-10	-2.03407e-12	-1.14032e-13	5.98292e-09	6.66697e-11	-0.000339979	-1.90595e-05	-0.0130033	0.0111434
2022-03-15 10:58:16	4511974	-5.11699e-12	-5.54391e-11	5.98972e-09	-8.48496e-11	2.17349e-10	-3.31581e-12	-1.10878e-13	5.95977e-09	7.75936e-11	-0.000556365	-1.86044e-05	-0.0142371	0.0130196
2022-03-15 10:58:32	4527907	1.97799e-12	-6.19506e-11	5.94873e-09	-8.57848e-11	1.98514e-10	1.28174e-12	-1.23901e-13	5.91899e-09	7.08695e-11	0.000216547	-2.09328e-05	-0.0144932	0.0119732
2022-03-15 10:58:48	4543841	-1.10939e-11	-6.14694e-11	5.9331e-09	-8.04313e-11	2.03213e-10	-7.18885e-12	-1.22939e-13	5.90343e-09	7.2547e-11	-0.00121774	-2.0825e-05	-0.0136245	0.012289
2022-03-15 10:59:04	4559774	-7.05198e-12	-6.19096e-11	5.93106e-09	-8.04098e-11	1.95703e-10	-4.56968e-12	-1.23819e-13	5.9014e-09	6.9866e-11	-0.000774338	-2.09813e-05	-0.0136255	0.0118389
2022-03-15 10:59:20	4575707	-1.22764e-11	-4.97468e-11	5.89281e-09	-8.64298e-11	2.02061e-10	-7.95511e-12	-9.94936e-14	5.86335e-09	7.21358e-11	-0.00135675	-1.69687e-05	-0.0147407	0.0123028
2022-03-15 10:59:36	4591641	-1.53187e-11	-6.20734e-11	5.88579e-09	-9.76958e-11	1.93806e-10	-9.92652e-12	-1.24147e-13	5.85636e-09	6.91887e-11	-0.001695	-2.11986e-05	-0.016682	0.0118143
2022-03-15 10:59:52	4607574	-1.53724e-11	-6.4203e-11	5.84424e-09	-9.03751e-11	1.83779e-10	-9.96132e-12	-1.28406e-13	5.81502e-09	6.56091e-11	-0.00171303	-2.20818e-05	-0.0155417	0.0112827
2022-03-15 11:00:08	4623506	-1.59314e-11	-6.15309e-11	5.8419e-09	-8.12053e-11	1.81045e-10	-1.03235e-11	-1.23062e-13	5.81269e-09	6.46331e-11	-0.00177604	-2.11712e-05	-0.0139703	0.0111193
2022-03-15 11:00:24	4639439	-1.72752e-11	-5.78451e-11	5.83908e-09	-9.14823e-11	1.83011e-10	-1.11943e-11	-1.1569e-13	5.80988e-09	6.53349e-11	-0.00192677	-1.99127e-05	-0.015746	0.0112455
2022-03-15 11:00:40	4655371	-2.07474e-11	-6.29642e-11	5.82426e-09	-8.96011e-11	1.85299e-10	-1.34443e-11	-1.25928e-13	5.79514e-09	6.61517e-11	-0.00231993	-2.173e-05	-0.0154614	0.011415
2022-03-15 11:00:56	4671304	-1.71569e-11	-5.90942e-11	5.79843e-09	-9.08911e-11	1.83924e-10	-1.11177e-11	-1.18188e-13	5.76944e-09	6.56609e-11	-0.00192699	-2.04853e-05	-0.0157539	0.0113808
2022-03-15 11:01:12	4687236	-2.45314e-11	-5.51934e-11	5.77378e-09	-8.67416e-11	1.85506e-10	-1.58963e-11	-1.10387e-13	5.74491e-09	6.62256e-11	-0.00276703	-1.92147e-05	-0.0150989	0.0115277
2022-03-15 11:01:28	4703169	-2.85734e-11	-5.88075e-11	5.7489e-09	-8.86443e-11	1.8632e-10	-1.85156e-11	-1.17615e-13	5.72016e-09	6.65162e-11	-0.0032369	-2.05615e-05	-0.0154968	0.0116284
2022-03-15 11:01:44	4719101	-2.67352e-11	-5.63401e-11	5.74464e-09	-8.81498e-11	1.91734e-10	-1.73244e-11	-1.1268e-13	5.71592e-09	6.8449e-11	-0.00303091	-1.97134e-05	-0.0154218	0.0119752
2022-03-15 11:02:00	4735034	-3.24111e-11	-6.80934e-11	5.74668e-09	-9.43848e-11	1.81705e-10	-2.10024e-11	-1.36187e-13	5.71795e-09	6.48687e-11	-0.00367307	-2.38174e-05	-0.0165068	0.0113448
2022-03-15 11:02:15	4750966	-3.36581e-11	-5.33813e-11	5.72732e-09	-8.97946e-11	1.84761e-10	-2.18104e-11	-1.06763e-13	5.69868e-09	6.59597e-11	-0.00382728	-1.87346e-05	-0.0157571	0.0115745
2022-03-15 11:02:31	4766899	-4.11079e-11	-6.3947e-11	5.72121e-09	-9.27831e-11	1.84224e-10	-2.66379e-11	-1.27894e-13	5.6926e-09	6.5768e-11	-0.00467939	-2.24667e-05	-0.0162989	0.0115532
2022-03-15 11:02:47	4782832	-3.59264e-11	-5.77018e-11	5.71444e-09	-9.36216e-11	1.6806e-10	-2.32803e-11	-1.15404e-13	5.68587e-09	5.99974e-11	-0.00409442	-2.02966e-05	-0.0164657	0.010552
2022-03-15 11:03:03	4798766	-3.64531e-11	-5.93091e-11	5.69279e-09	-9.14501e-11	1.78127e-10	-2.36216e-11	-1.18618e-13	5.66433e-09	6.35913e-11	-0.00417024	-2.09413e-05	-0.0161449	0.0112266
2022-03-15 11:03:19	4814699	-3.87321e-11	-5.82239e-11	5.6859e-09	-8.67523e-11	1.83947e-10	-2.50984e-11	-1.16448e-13	5.65747e-09	6.56691e-11	-0.00443633	-2.0583e-05	-0.0153341	0.0116075
2022-03-15 11:03:35	4830631	-3.94201e-11	-6.2872e-11	5.69011e-09	-8.33016e-11	1.89729e-10	-2.55442e-11	-1.25744e-13	5.66166e-09	6.77333e-11	-0.00451179	-2.22097e-05	-0.0147133	0.0119635
2022-03-15 11:03:51	4846564	-4.14626e-11	-6.31996e-11	5.69851e-09	-9.14501e-11	1.8397e-10	-2.68678e-11	-1.26399e-13	5.67002e-09	6.56773e-11	-0.00473857	-2.22926e-05	-0.0161287	0.0115833
2022-03-15 11:04:07	4862496	-5.49969e-11	-6.96393e-11	5.68258e-09	-9.25466e-11	1.76699e-10	-3.5638e-11	-1.39279e-13	5.65417e-09	6.30815e-11	-0.00630296	-2.46329e-05	-0.0163679	0.0111566
2022-03-15 11:04:23	4878429	-4.92994e-11	-5.56747e-11	5.67976e-09	-8.72468e-11	1.72736e-10	-3.1946e-11	-1.11349e-13	5.65136e-09	6.16668e-11	-0.0056528	-1.97031e-05	-0.0154382	0.0109118
2022-03-15 11:04:39	4894361	-4.33869e-11	-6.80831e-11	5.69193e-09	-8.92141e-11	1.58416e-10	-2.81147e-11	-1.36166e-13	5.66347e-09	5.65545e-11	-0.00496422	-2.40429e-05	-0.0157526	0.00998584
2022-03-15 11:04:55	4910294	-4.30859e-11	-5.61047e-11	5.65337e-09	-9.85128e-11	1.74418e-10	-2.79197e-11	-1.12209e-13	5.6251e-09	6.22672e-11	-0.0049634	-1.9948e-05	-0.0175131	0.0110695
2022-03-15 11:05:11	4926227	-4.25376e-11	-7.14925e-11	5.66682e-09	-1.04231e-10	1.76076e-10	-2.75644e-11	-1.42985e-13	5.63849e-09	6.28591e-11	-0.00488861	-2.53588e-05	-0.0184856	0.0111482
2022-03-15 11:05:27	4942161	-4.29461e-11	-6.44896e-11	5.63685e-09	-9.22778e-11	1.65035e-10	-2.78291e-11	-1.28979e-13	5.60867e-09	5.89175e-11	-0.0049618	-2.29964e-05	-0.0164527	0.0105047
2022-03-15 11:05:43	4958094	-4.89446e-11	-7.38779e-11	5.6383e-09	-9.34281e-11	1.68744e-10	-3.17161e-11	-1.47756e-13	5.61011e-09	6.02416e-11	-0.00565338	-2.63374e-05	-0.0166535	0.010738
2022-03-15 11:05:59	4974027	-4.12154e-11	-7.17893e-11	5.713e-09	-9.48256e-11	1.69281e-10	-2.67076e-11	-1.43579e-13	5.68443e-09	6.04333e-11	-0.00469837	-2.52582e-05	-0.0166816	0.0106314
2022-03-15 11:06:14	4989961	-5.32984e-11	-6.12236e-11	5.65325e-09	-9.41053e-11	1.56611e-10	-3.45374e-11	-1.22447e-13	5.62498e-09	5.59101e-11	-0.00613999	-2.17685e-05	-0.0167299	0.00993961
2022-03-15 11:06:30	5005894	-4.18819e-11	-6.43974e-11	5.66057e-09	-9.87278e-11	1.49041e-10	-2.71395e-11	-1.28795e-13	5.63227e-09	5.32076e-11	-0.00481857	-2.28673e-05	-0.017529	0.00944693
2022-03-15 11:06:46	5021826	-3.48836e-11	-7.02434e-11	5.65547e-09	-9.32346e-11	1.9869e-10	-2.26046e-11	-1.40487e-13	5.62719e-09	7.09323e-11	-0.00401702	-2.49657e-05	-0.0165686	0.0126053
2022-03-15 11:07:02	5037759	-6.36829e-11	-6.76122e-11	6.11017e-09	-1.03232e-10	1.65135e-10	-4.12665e-11	-1.35224e-13	6.07962e-09	5.89532e-11	-0.00678768	-2.22422e-05	-0.01698	0.00969686
2022-03-15 11:07:18	5053691	-4.41394e-11	-6.67215e-11	5.27348e-09	-1.04307e-10	1.63046e-10	-2.86023e-11	-1.33443e-13	5.24711e-09	5.82074e-11	-0.00545106	-2.54317e-05	-0.0198789	0.0110932
2022-03-15 11:07:34	5069624	-4.33009e-11	-7.34479e-11	5.22516e-09	-9.04718e-11	1.56865e-10	-2.8059e-11	-1.46896e-13	5.19903e-09	5.60008e-11	-0.00539696	-2.82544e-05	-0.0174017	0.0107714
2022-03-15 11:07:50	5085557	-5.50721e-11	-6.58512e-11	5.44459e-09	-9.45353e-11	1.60381e-10	-3.56867e-11	-1.31702e-13	5.41737e-09	5.7256e-11	-0.00658747	-2.43111e-05	-0.0174504	0.010569
2022-03-15 11:08:06	5101490	-4.80954e-11	-6.48991e-11	5.61274e-09	-1.02984e-10	1.54392e-10	-3.11658e-11	-1.29798e-13	5.58468e-09	5.51179e-11	-0.0055806	-2.32418e-05	-0.0184405	0.0098695
2022-03-15 11:08:22	5117424	-5.16536e-11	-6.2872e-11	5.70111e-09	-9.29228e-11	1.79901e-10	-3.34715e-11	-1.25744e-13	5.6726e-09	6.42247e-11	-0.00590056	-2.21669e-05	-0.016381	0.0113219
2022-03-15 11:08:38	5133357	-4.00759e-11	-6.1541e-11	3.13216e-08	-1.04694e-10	1.73612e-10	-2.59692e-11	-1.23082e-13	3.1165e-08	6.19795e-11	-0.000833281	-3.94937e-06	-0.00335935	0.00198875
2022-03-15 11:08:54	5149801	-4.11294e-11	-6.6445e-11	1.52112e-07	-9.31163e-11	1.50192e-10	-2.66519e-11	-1.3289e-13	1.51351e-07	5.36185e-11	-0.000176092	-8.78023e-07	-0.000615232	0.000354265
2022-03-15 11:09:10	5165464	-4.10756e-11	-6.70696e-11	2.67047e-07	-8.09581e-11	1.3783e-10	-2.6617e-11	-1.34139e-13	2.65712e-07	4.92053e-11	-0.000100172	-5.0483e-07	-0.000304684	0.000185183
2022-03-15 11:09:25	5180616	-3.93771e-11	-8.41774e-11	3.12107e-07	-9.87063e-11	1.31434e-10	-2.55164e-11	-1.68355e-13	3.10546e-07	4.69219e-11	-8.2166e-05	-5.42124e-07	-0.000317847	0.000151095
2022-03-15 11:09:40	5195769	-5.25244e-11	-7.59768e-11	3.54749e-07	-8.70211e-11	1.18679e-10	-3.40358e-11	-1.51954e-13	3.52975e-07	4.23684e-11	-9.64255e-05	-4.30494e-07	-0.000246536	0.000120032
2022-03-15 11:09:55	5210921	-6.06406e-11	-7.7277e-11	3.76966e-07	-8.65051e-11	1.25375e-10	-3.92951e-11	-1.54554e-13	3.75081e-07	4.47589e-11	-0.000104764	-4.12055e-07	-0.00023063	0.000119331
2022-03-15 11:10:11	5226074	-4.99551e-11	-7.95089e-11	3.90493e-07	-8.65803e-11	1.22326e-10	-3.23709e-11	-1.59018e-13	3.88541e-07	4.36704e-11	-8.33141e-05	-4.0927e-07	-0.000222835	0.000112396
2022-03-15 11:10:26	5241227	-6.21564e-11	-7.31408e-11	3.81803e-07	-8.84508e-11	1.33637e-10	-4.02773e-11	-1.46282e-13	3.79894e-07	4.77084e-11	-0.000106023	-3.85059e-07	-0.00023283	0.000125583
2022-03-15 11:10:41	5256381	6.96695e-10	-6.54008e-11	3.85655e-07	5.68566e-11	2.36991e-10	4.51458e-10	-1.30802e-13	3.83727e-07	8.46058e-11	0.00117651	-3.40872e-07	0.00014817	0.000220484
2022-03-15 11:10:59	5274785	7.67158e-09	-6.5626e-11	3.72576e-07	2.46583e-10	2.97336e-10	4.97118e-09	-1.31252e-13	3.70713e-07	1.06149e-10	0.0134098	-3.54053e-07	0.000665159	0.000286337
2022-03-15 11:11:12	5287727	9.37579e-09	-6.29642e-11	3.51703e-07	3.05966e-10	3.03379e-10	6.07551e-09	-1.25928e-13	3.49944e-07	1.08306e-10	0.0173614	-3.59853e-07	0.000874327	0.000309496
2022-03-15 11:11:26	5301711	1.1108e-08	-5.98313e-11	3.55107e-07	3.32733e-10	3.15443e-10	7.19798e-09	-1.19663e-13	3.53331e-07	1.12613e-10	0.0203718	-3.3867e-07	0.000941702	0.000318718
2022-03-15 11:11:39	5314124	1.17792e-08	-6.77658e-11	3.56541e-07	3.44483e-10	3.06643e-10	7.63292e-09	-1.35532e-13	3.54758e-07	1.09472e-10	0.0215158	-3.82039e-07	0.000971036	0.000308581
2022-03-15 11:11:51	5326535	1.24168e-08	-6.03739e-11	3.55287e-07	3.56415e-10	3.20204e-10	8.04609e-09	-1.20748e-13	3.53511e-07	1.14313e-10	0.0227605	-3.41568e-07	0.00100822	0.000323365
2022-03-15 11:12:03	5338949	1.25149e-08	-6.13874e-11	3.51524e-07	3.55845e-10	3.27237e-10	8.10966e-09	-1.22775e-13	3.49766e-07	1.16824e-10	0.0231859	-3.51019e-07	0.00101738	0.000334005
2022-03-15 11:12:16	5351361	1.27252e-08	-5.16613e-11	3.50987e-07	3.61167e-10	3.20249e-10	8.24593e-09	-1.03323e-13	3.49232e-07	1.14329e-10	0.0236116	-2.95857e-07	0.00103417	0.000327372
2022-03-15 11:12:28	5363774	1.27057e-08	-5.91044e-11	3.49374e-07	3.80377e-10	3.20026e-10	8.23329e-09	-1.18209e-13	3.47627e-07	1.14249e-10	0.0236843	-3.40045e-07	0.00109421	0.000328655
2022-03-15 11:12:41	5376186	1.27514e-08	-5.8869e-11	3.48478e-07	3.59608e-10	3.06451e-10	8.26291e-09	-1.17738e-13	3.46736e-07	1.09403e-10	0.0238306	-3.39561e-07	0.00103712	0.000315523
2022-03-15 11:12:53	5388599	1.20379e-08	-6.96803e-11	3.5242e-07	3.23961e-10	2.87592e-10	7.80056e-09	-1.39361e-13	3.50658e-07	1.0267e-10	0.0222455	-3.97426e-07	0.000923866	0.000292793
2022-03-15 11:13:06	5401011	9.95512e-09	-6.65987e-11	3.59138e-07	1.95133e-10	2.44339e-10	6.45092e-09	-1.33197e-13	3.57342e-07	8.7229e-11	0.0180525	-3.72745e-07	0.000546067	0.000244105
2022-03-15 11:13:18	5413934	5.08687e-09	-7.2762e-11	3.27068e-07	9.91363e-11	2.41713e-10	3.29629e-09	-1.45524e-13	3.25433e-07	8.62915e-11	0.010129	-4.47171e-07	0.000304629	0.000265159
2022-03-15 11:13:31	5426877	3.27847e-09	-6.61277e-11	3.26262e-07	3.43999e-11	2.18424e-10	2.12445e-09	-1.32255e-13	3.24631e-07	7.79774e-11	0.0065442	-4.07403e-07	0.000105966	0.000240203
2022-03-15 11:13:44	5439820	2.11132e-09	-7.56184e-11	3.31905e-07	1.19647e-11	2.04656e-10	1.36814e-09	-1.51237e-13	3.30245e-07	7.30622e-11	0.00414278	-4.57953e-07	3.62297e-05	0.000221236
2022-03-15 11:13:57	5452764	1.45547e-09	-7.87615e-11	3.46149e-07	-2.18977e-11	1.94974e-10	9.43145e-10	-1.57523e-13	3.44418e-07	6.96057e-11	0.00273837	-4.5736e-07	-6.35788e-05	0.000202096
2022-03-15 11:14:10	5465706	9.98834e-10	-7.12468e-11	3.59408e-07	-4.04629e-11	1.7117e-10	6.47244e-10	-1.42494e-13	3.57611e-07	6.11077e-11	0.00180991	-3.9846e-07	-0.000113148	0.000170878
2022-03-15 11:14:24	5479689	6.37753e-10	-8.0246e-11	3.70695e-07	-5.44916e-11	1.6267e-10	4.13264e-10	-1.60492e-13	3.68842e-07	5.80732e-11	0.00112044	-4.35125e-07	-0.000147737	0.000157448
2022-03-15 11:14:39	5494842	4.18819e-10	-7.97649e-11	3.75532e-07	-5.95011e-11	1.72767e-10	2.71395e-10	-1.5953e-13	3.73654e-07	6.16778e-11	0.000726326	-4.26945e-07	-0.000159241	0.000165067
2022-03-15 11:14:54	5509995	2.8539e-10	-8.1577e-11	2.94459e-07	-7.88511e-11	1.89138e-10	1.84933e-10	-1.63154e-13	2.92987e-07	6.75223e-11	0.000631198	-5.56865e-07	-0.000269129	0.000230462
2022-03-15 11:15:10	5525149	2.01282e-10	-7.27825e-11	1.67968e-07	-8.06678e-11	2.19676e-10	1.30431e-10	-1.45565e-13	1.67128e-07	7.84243e-11	0.000780423	-8.70978e-07	-0.00048267	0.000469247
2022-03-15 11:15:25	5540300	1.56906e-10	-7.83315e-11	9.21808e-08	-7.92381e-11	2.23469e-10	1.01675e-10	-1.56663e-13	9.17199e-08	7.97784e-11	0.00110854	-1.70806e-06	-0.000863914	0.000869805
2022-03-15 11:15:40	5555454	1.13831e-10	-7.4697e-11	5.02213e-08	-8.80638e-11	2.24736e-10	7.37625e-11	-1.49394e-13	4.99702e-08	8.02308e-11	0.00147613	-2.98966e-06	-0.00176233	0.00160557
2022-03-15 11:15:56	5571117	9.45676e-11	-7.06427e-11	2.91839e-08	-9.51158e-11	2.14116e-10	6.12798e-11	-1.41285e-13	2.9038e-08	7.64394e-11	0.00211033	-4.86554e-06	-0.00327557	0.00263239
2022-03-15 11:16:11	5586521	6.92943e-11	-7.85363e-11	1.8322e-08	-1.02576e-10	2.16904e-10	4.49027e-11	-1.57073e-13	1.82304e-08	7.74347e-11	0.00246307	-8.61598e-06	-0.00562665	0.00424756
2022-03-15 11:16:26	5601924	5.22234e-11	-7.26187e-11	1.27313e-08	-9.15468e-11	2.10592e-10	3.38408e-11	-1.45237e-13	1.26676e-08	7.51813e-11	0.00267143	-1.14652e-05	-0.00722682	0.00593491
2022-03-15 11:16:42	5617326	6.01354e-11	-7.50655e-11	9.7785e-09	-9.92653e-11	2.14063e-10	3.89677e-11	-1.50131e-13	9.72961e-09	7.64205e-11	0.00400507	-1.54303e-05	-0.0102024	0.00785443
2022-03-15 11:16:57	5632729	2.73694e-11	-7.69084e-11	8.15763e-09	-9.78893e-11	2.03551e-10	1.77354e-11	-1.53817e-13	8.11684e-09	7.26677e-11	0.00218501	-1.89503e-05	-0.01206	0.00895271
2022-03-15 11:17:13	5648131	1.58669e-11	-7.85363e-11	7.23342e-09	-1.00598e-10	2.14193e-10	1.02818e-11	-1.57073e-13	7.19725e-09	7.64669e-11	0.00142857	-2.1824e-05	-0.0139773	0.0106245
2022-03-15 11:17:29	5664574	4.06349e-12	-7.43591e-11	6.76244e-09	-1.00609e-10	2.02468e-10	2.63314e-12	-1.48718e-13	6.72863e-09	7.22811e-11	0.000391334	-2.21023e-05	-0.0149524	0.0107423
2022-03-15 11:17:45	5680506	2.80574e-12	-7.38165e-11	6.46002e-09	-9.75238e-11	2.02744e-10	1.81812e-12	-1.47633e-13	6.42772e-09	7.23796e-11	0.000282856	-2.29682e-05	-0.0151724	0.0112605
2022-03-15 11:18:01	5696439	-8.55698e-12	-6.95984e-11	6.302e-09	-9.16973e-11	1.92117e-10	-5.54492e-12	-1.39197e-13	6.27049e-09	6.85858e-11	-0.000884289	-2.21987e-05	-0.0146236	0.0109379
2022-03-15 11:18:17	5712372	-1.18894e-11	-7.65296e-11	6.18388e-09	-9.33528e-11	2.00272e-10	-7.70433e-12	-1.53059e-13	6.15296e-09	7.14971e-11	-0.00125213	-2.48757e-05	-0.015172	0.01162
2022-03-15 11:18:33	5728306	-1.35342e-11	-7.95908e-11	6.11443e-09	-9.54598e-11	1.61603e-10	-8.77016e-12	-1.59182e-13	6.08386e-09	5.76923e-11	-0.00144155	-2.61646e-05	-0.0156907	0.00948284
2022-03-15 11:18:49	5744239	-1.27279e-11	-6.44896e-11	6.06433e-09	-1.01049e-10	1.92609e-10	-8.24768e-12	-1.28979e-13	6.03401e-09	6.87614e-11	-0.00136687	-2.13754e-05	-0.0167466	0.0113956
2022-03-15 11:19:05	5760172	-2.45099e-11	-8.4413e-11	6.00905e-09	-1.05908e-10	1.65634e-10	-1.58824e-11	-1.68826e-13	5.979e-09	5.91313e-11	-0.00265636	-2.82365e-05	-0.0177133	0.00988983
2022-03-15 11:19:21	5776106	-2.15214e-11	-7.41134e-11	5.99282e-09	-1.05328e-10	1.76e-10	-1.39459e-11	-1.48227e-13	5.96286e-09	6.2832e-11	-0.00233879	-2.48584e-05	-0.017664	0.0105372
2022-03-15 11:19:37	5792039	-1.91779e-11	-7.98979e-11	5.97208e-09	-1.02834e-10	1.83134e-10	-1.24273e-11	-1.59796e-13	5.94222e-09	6.53788e-11	-0.00209135	-2.68916e-05	-0.0173057	0.0110024
2022-03-15 11:19:52	5807972	-2.14569e-11	-8.68598e-11	5.96303e-09	-9.9491e-11	1.70026e-10	-1.39041e-11	-1.7372e-13	5.93321e-09	6.06993e-11	-0.00234343	-2.92792e-05	-0.0167685	0.0102304
2022-03-15 11:20:08	5823906	-4.09251e-11	-7.78093e-11	5.94567e-09	-1.11649e-10	1.82227e-10	-2.65195e-11	-1.55619e-13	5.91594e-09	6.5055e-11	-0.00448271	-2.6305e-05	-0.0188726	0.0109966
2022-03-15 11:20:24	5839839	-4.37846e-11	-7.6673e-11	5.90645e-09	-1.02124e-10	1.77482e-10	-2.83724e-11	-1.53346e-13	5.87692e-09	6.33611e-11	-0.00482777	-2.60929e-05	-0.0173771	0.0107813
2022-03-15 11:20:40	5855772	-3.86139e-11	-7.0356e-11	5.88222e-09	-9.84483e-11	1.71393e-10	-2.50218e-11	-1.40712e-13	5.85281e-09	6.11873e-11	-0.00427518	-2.40418e-05	-0.0168207	0.0104543
2022-03-15 11:20:56	5871706	-4.81491e-11	-7.87512e-11	5.85775e-09	-1.05038e-10	1.74886e-10	-3.12006e-11	-1.57502e-13	5.82846e-09	6.24343e-11	-0.00535315	-2.7023e-05	-0.0180216	0.010712
2022-03-15 11:21:12	5887639	-4.22151e-11	-8.31741e-11	5.85729e-09	-1.06779e-10	1.63768e-10	-2.73554e-11	-1.66348e-13	5.828e-09	5.84652e-11	-0.00469378	-2.85429e-05	-0.0183217	0.0100318
2022-03-15 11:21:28	5903572	-4.58164e-11	-8.2437e-11	5.83957e-09	-1.04457e-10	1.61664e-10	-2.9689e-11	-1.64874e-13	5.81037e-09	5.7714e-11	-0.00510966	-2.83758e-05	-0.0179777	0.00993293
2022-03-15 11:21:44	5919505	-4.75794e-11	-7.70108e-11	5.80136e-09	-1.07908e-10	1.55221e-10	-3.08315e-11	-1.54022e-13	5.77235e-09	5.54139e-11	-0.00534123	-2.66826e-05	-0.0186939	0.00959988
2022-03-15 11:22:00	5935439	-3.24972e-11	-7.1001e-11	5.79977e-09	-1.10552e-10	1.63154e-10	-2.10582e-11	-1.42002e-13	5.77077e-09	5.8246e-11	-0.00364911	-2.46071e-05	-0.0191572	0.0100933
2022-03-15 11:22:16	5951372	-4.29139e-11	-7.88434e-11	5.78912e-09	-1.0464e-10	1.65135e-10	-2.78082e-11	-1.57687e-13	5.76017e-09	5.89532e-11	-0.00482767	-2.73754e-05	-0.0181661	0.0102346
2022-03-15 11:22:32	5967306	-4.97616e-11	-8.22117e-11	5.76822e-09	-1.0908e-10	1.63753e-10	-3.22455e-11	-1.64423e-13	5.73938e-09	5.84598e-11	-0.00561829	-2.86483e-05	-0.0190055	0.0101857
2022-03-15 11:22:48	5983239	-4.07746e-11	-7.15436e-11	5.76058e-09	-1.17626e-10	1.6204e-10	-2.64219e-11	-1.43087e-13	5.73178e-09	5.78483e-11	-0.00460973	-2.49638e-05	-0.0205217	0.0100926
2022-03-15 11:23:04	5999172	-5.36746e-11	-7.60074e-11	5.75827e-09	-9.99425e-11	1.59652e-10	-3.47811e-11	-1.52015e-13	5.72948e-09	5.69958e-11	-0.00607056	-2.6532e-05	-0.0174436	0.00994781
2022-03-15 11:23:20	6015106	-5.00734e-11	-8.26212e-11	5.73542e-09	-1.03866e-10	1.4957e-10	-3.24476e-11	-1.65242e-13	5.70674e-09	5.33965e-11	-0.00568583	-2.89556e-05	-0.0182006	0.00935674
2022-03-15 11:23:36	6031039	-5.81789e-11	-8.84058e-11	5.74295e-09	-1.12692e-10	1.50254e-10	-3.76999e-11	-1.76812e-13	5.71424e-09	5.36407e-11	-0.00659755	-3.09423e-05	-0.0197213	0.0093872
2022-03-15 11:23:51	6046972	-5.37929e-11	-7.41031e-11	5.7306e-09	-1.11219e-10	1.37177e-10	-3.48578e-11	-1.48206e-13	5.70195e-09	4.89722e-11	-0.00611332	-2.59922e-05	-0.0195054	0.00858868
2022-03-15 11:24:07	6062905	-6.97458e-11	-8.01539e-11	5.73843e-09	-1.22087e-10	1.59484e-10	-4.51953e-11	-1.60308e-13	5.70974e-09	5.69358e-11	-0.00791547	-2.80762e-05	-0.0213822	0.0099717
2022-03-15 11:24:23	6078839	-6.05439e-11	-8.26008e-11	5.72452e-09	-1.0751e-10	1.54791e-10	-3.92324e-11	-1.65202e-13	5.6959e-09	5.52604e-11	-0.00688784	-2.90036e-05	-0.018875	0.00970179
2022-03-15 11:24:39	6094772	-6.16511e-11	-8.94398e-11	5.71849e-09	-1.19443e-10	1.54177e-10	-3.99499e-11	-1.7888e-13	5.6899e-09	5.50412e-11	-0.0070212	-3.14381e-05	-0.0209921	0.00967349
2022-03-15 11:24:55	6110706	-5.82971e-11	-8.12391e-11	5.7121e-09	-1.08058e-10	1.69696e-10	-3.77765e-11	-1.62478e-13	5.68354e-09	6.05815e-11	-0.00664665	-2.85875e-05	-0.0190124	0.0106591
2022-03-15 11:25:11	6126639	-6.41881e-11	-7.58539e-11	5.72012e-09	-1.1152e-10	1.52557e-10	-4.15939e-11	-1.51708e-13	5.69152e-09	5.44628e-11	-0.00730805	-2.66551e-05	-0.0195941	0.00956912
2022-03-15 11:25:27	6142570	-5.81896e-11	-8.04201e-11	5.71974e-09	-1.08295e-10	1.61449e-10	-3.77069e-11	-1.6084e-13	5.69114e-09	5.76373e-11	-0.00662554	-2.82615e-05	-0.0190287	0.0101275
2022-03-15 11:25:43	6158504	-6.61768e-11	-8.50989e-11	5.69633e-09	-1.08639e-10	1.51996e-10	-4.28826e-11	-1.70198e-13	5.66785e-09	5.42626e-11	-0.00756593	-3.00286e-05	-0.0191676	0.00957375
2022-03-15 11:25:59	6174436	-5.67061e-11	-8.30922e-11	5.67134e-09	-1.20453e-10	1.28324e-10	-3.67456e-11	-1.66184e-13	5.64298e-09	4.58117e-11	-0.00651172	-2.94497e-05	-0.0213456	0.00811834
2022-03-15 11:26:15	6190369	-6.00924e-11	-7.72668e-11	5.69622e-09	-1.10789e-10	1.34566e-10	-3.89399e-11	-1.54534e-13	5.66774e-09	4.80401e-11	-0.00687044	-2.72655e-05	-0.0195473	0.00847605
2022-03-15 11:26:31	6206302	-7.35191e-11	-8.63684e-11	5.69293e-09	-1.10359e-10	1.43873e-10	-4.76404e-11	-1.72737e-13	5.66447e-09	5.13627e-11	-0.00841039	-3.04948e-05	-0.0194827	0.00906752
2022-03-15 11:26:47	6222236	-5.29006e-11	-7.48812e-11	5.69792e-09	-1.08789e-10	1.59253e-10	-3.42796e-11	-1.49762e-13	5.66943e-09	5.68533e-11	-0.00604639	-2.64158e-05	-0.0191887	0.010028
2022-03-15 11:27:03	6238169	-5.66631e-11	-8.70339e-11	5.70902e-09	-1.06682e-10	1.54746e-10	-3.67177e-11	-1.74068e-13	5.68047e-09	5.52443e-11	-0.00646384	-3.06432e-05	-0.0187805	0.0097253
2022-03-15 11:27:19	6254100	-6.85741e-11	-7.80039e-11	5.68138e-09	-1.16497e-10	1.71639e-10	-4.4436e-11	-1.56008e-13	5.65297e-09	6.12751e-11	-0.00786065	-2.75975e-05	-0.0206081	0.0108395
2022-03-15 11:27:35	6270034	-6.36076e-11	-7.72565e-11	5.66812e-09	-1.0822e-10	1.60919e-10	-4.12177e-11	-1.54513e-13	5.63978e-09	5.74481e-11	-0.00730839	-2.7397e-05	-0.0191887	0.0101862
2022-03-15 11:27:50	6285967	-6.99071e-11	-6.33839e-11	5.66988e-09	-1.06048e-10	1.68406e-10	-4.52998e-11	-1.26768e-13	5.64153e-09	6.01209e-11	-0.0080297	-2.24705e-05	-0.0187977	0.0106568
2022-03-15 11:28:06	6301900	-8.01626e-11	-8.98493e-11	5.55769e-09	-1.20034e-10	1.34206e-10	-5.19454e-11	-1.79699e-13	5.5299e-09	4.79115e-11	-0.00939354	-3.24958e-05	-0.0217064	0.00866409
2022-03-15 11:28:22	6317834	-5.77811e-11	-8.88665e-11	5.26418e-09	-1.1897e-10	1.34659e-10	-3.74422e-11	-1.77733e-13	5.23786e-09	4.80733e-11	-0.00714837	-3.39324e-05	-0.0227135	0.00917804
2022-03-15 11:28:38	6333765	-6.37259e-11	-7.62634e-11	5.29877e-09	-1.02157e-10	1.4213e-10	-4.12944e-11	-1.52527e-13	5.27228e-09	5.07404e-11	-0.00783236	-2.893e-05	-0.0193763	0.009624
2022-03-15 11:28:54	6349699	-6.59404e-11	-8.4546e-11	5.52837e-09	-1.12487e-10	1.59545e-10	-4.27294e-11	-1.69092e-13	5.50073e-09	5.69576e-11	-0.00776795	-3.07399e-05	-0.0204495	0.0103546
2022-03-15 11:29:10	6365631	-6.70046e-11	-8.07579e-11	5.6434e-09	-1.15411e-10	1.41692e-10	-4.3419e-11	-1.61516e-13	5.61518e-09	5.0584e-11	-0.00773242	-2.87641e-05	-0.0205534	0.00900844
2022-03-15 11:29:26	6381564	-6.08664e-11	-8.46587e-11	5.75789e-09	-1.25291e-10	1.57164e-10	-3.94414e-11	-1.69317e-13	5.7291e-09	5.61075e-11	-0.0068844	-2.95539e-05	-0.0218692	0.00979343
2022-03-15 11:29:42	6397497	-6.74453e-11	-8.62046e-11	5.90152e-08	-1.18067e-10	1.75762e-10	-4.37046e-11	-1.72409e-13	5.87201e-08	6.2747e-11	-0.000744286	-2.93612e-06	-0.00201067	0.00106858
2022-03-15 11:29:58	6413941	-5.58999e-11	-8.7597e-11	2.36678e-07	-9.9362e-11	1.46683e-10	-3.62231e-11	-1.75194e-13	2.35495e-07	5.23658e-11	-0.000153817	-7.43941e-07	-0.000421929	0.000222365
2022-03-15 11:30:14	6429604	-6.71981e-11	-9.27468e-11	2.87203e-07	-1.06048e-10	1.32701e-10	-4.35444e-11	-1.85494e-13	2.85767e-07	4.73743e-11	-0.000152377	-6.49108e-07	-0.0003711	0.000165779
2022-03-15 11:30:29	6444756	-6.87138e-11	-9.8019e-11	3.38445e-07	-1.00157e-10	1.28039e-10	-4.45265e-11	-1.96038e-13	3.36753e-07	4.57099e-11	-0.000132223	-5.82142e-07	-0.00029742	0.000135737
2022-03-15 11:30:44	6459909	-7.30353e-11	-9.54695e-11	3.45522e-07	-9.93943e-11	1.17336e-10	-4.73269e-11	-1.90939e-13	3.43794e-07	4.1889e-11	-0.00013766	-5.55387e-07	-0.00028911	0.000121843
2022-03-15 11:31:00	6475061	-8.42906e-11	-9.2757e-11	3.80012e-07	-1.14197e-10	1.14119e-10	-5.46203e-11	-1.85514e-13	3.78112e-07	4.07405e-11	-0.000144455	-4.90632e-07	-0.000302019	0.000107747
2022-03-15 11:31:15	6490214	-8.20653e-11	-9.16717e-11	3.91747e-07	-1.02339e-10	1.06616e-10	-5.31783e-11	-1.83343e-13	3.89788e-07	3.80619e-11	-0.000136429	-4.70367e-07	-0.00026255	9.76477e-05
2022-03-15 11:31:30	6505366	-8.28286e-11	-9.92476e-11	3.81087e-07	-1.06381e-10	1.26358e-10	-5.36729e-11	-1.98495e-13	3.79182e-07	4.51098e-11	-0.000141549	-5.23483e-07	-0.000280554	0.000118966
2022-03-15 11:31:45	6520519	1.98952e-09	-8.32868e-11	3.81087e-07	1.07091e-10	2.27531e-10	1.28921e-09	-1.66574e-13	3.79182e-07	8.12286e-11	0.00339998	-4.39298e-07	0.000282427	0.000214221
2022-03-15 11:32:03	6538922	8.4893e-09	-8.76379e-11	3.48567e-07	2.42218e-10	2.51142e-10	5.50107e-09	-1.75276e-13	3.46824e-07	8.96577e-11	0.0158613	-5.05374e-07	0.000698388	0.000258511
2022-03-15 11:32:16	6551864	9.81894e-09	-7.64477e-11	3.53674e-07	2.83756e-10	2.86709e-10	6.36267e-09	-1.52895e-13	3.51906e-07	1.02355e-10	0.0180806	-4.34478e-07	0.000806341	0.00029086
2022-03-15 11:32:30	6565846	1.13499e-08	-8.86003e-11	3.5672e-07	3.1664e-10	2.97513e-10	7.35474e-09	-1.77201e-13	3.54936e-07	1.06212e-10	0.0207213	-4.99246e-07	0.000892103	0.000299243
2022-03-15 11:32:43	6578259	1.19438e-08	-9.09449e-11	3.57616e-07	3.27014e-10	2.90426e-10	7.73958e-09	-1.8189e-13	3.55828e-07	1.03682e-10	0.0217509	-5.11173e-07	0.000919023	0.000291383
2022-03-15 11:32:55	6590671	1.2349e-08	-9.30949e-11	3.55287e-07	3.31529e-10	3.02389e-10	8.00215e-09	-1.8619e-13	3.53511e-07	1.07953e-10	0.0226362	-5.26688e-07	0.000937819	0.000305374
2022-03-15 11:33:08	6603084	1.25646e-08	-8.02255e-11	3.51524e-07	3.51019e-10	2.878e-10	8.14186e-09	-1.60451e-13	3.49766e-07	1.02745e-10	0.023278	-4.58738e-07	0.00100358	0.000293752
2022-03-15 11:33:20	6615495	1.25444e-08	-8.61227e-11	3.49284e-07	3.4043e-10	2.89535e-10	8.12877e-09	-1.72245e-13	3.47538e-07	1.03364e-10	0.0233896	-4.95617e-07	0.000979549	0.000297418
2022-03-15 11:33:32	6627909	1.27104e-08	-8.11572e-11	3.49463e-07	3.4187e-10	2.79016e-10	8.23634e-09	-1.62314e-13	3.47716e-07	9.96087e-11	0.023687	-4.66802e-07	0.000983188	0.000286466
2022-03-15 11:33:45	6640321	1.26513e-08	-8.14746e-11	3.50449e-07	3.28143e-10	2.69993e-10	8.19804e-09	-1.62949e-13	3.48697e-07	9.63875e-11	0.0235105	-4.67309e-07	0.000941056	0.000276422
2022-03-15 11:33:57	6652734	1.12034e-08	-9.26649e-11	3.56988e-07	3.02956e-10	2.30295e-10	7.2598e-09	-1.8533e-13	3.55203e-07	8.22153e-11	0.0204385	-5.21757e-07	0.000852909	0.00023146
2022-03-15 11:34:10	6665656	7.03925e-09	-8.3082e-11	3.33338e-07	1.35879e-10	2.22156e-10	4.56143e-09	-1.66164e-13	3.31671e-07	7.93097e-11	0.0137529	-5.0099e-07	0.00040968	0.000239121
2022-03-15 11:34:23	6678599	4.28952e-09	-8.16179e-11	3.27337e-07	4.57734e-11	2.11421e-10	2.77961e-09	-1.63236e-13	3.257e-07	7.54773e-11	0.00853425	-5.01184e-07	0.000140538	0.000231738
2022-03-15 11:34:36	6691540	2.74857e-09	-8.89074e-11	3.27695e-07	3.33249e-12	1.91519e-10	1.78107e-09	-1.77815e-13	3.26057e-07	6.83723e-11	0.00546247	-5.4535e-07	1.02206e-05	0.000209695
2022-03-15 11:34:49	6704484	1.81497e-09	-8.38601e-11	3.38713e-07	-2.99602e-11	1.80661e-10	1.1761e-09	-1.6772e-13	3.37019e-07	6.4496e-11	0.00348971	-4.97657e-07	-8.88975e-05	0.000191372
2022-03-15 11:35:02	6717425	1.25058e-09	-7.99287e-11	3.52778e-07	-4.87726e-11	1.79831e-10	8.10376e-10	-1.59857e-13	3.51014e-07	6.41997e-11	0.00230867	-4.55416e-07	-0.000138948	0.000182898
2022-03-15 11:35:16	6731409	7.96444e-10	-8.36655e-11	3.6747e-07	-7.22183e-11	1.74802e-10	5.16096e-10	-1.67331e-13	3.65633e-07	6.24043e-11	0.00141151	-4.57648e-07	-0.000197516	0.000170675
2022-03-15 11:35:31	6746562	5.11011e-10	-8.6655e-11	3.75532e-07	-7.09928e-11	1.52189e-10	3.31135e-10	-1.7331e-13	3.73654e-07	5.43315e-11	0.000886207	-4.63824e-07	-0.000189996	0.000145406
2022-03-15 11:35:46	6761716	3.33969e-10	-8.86106e-11	3.61468e-07	-7.96573e-11	1.58309e-10	2.16412e-10	-1.77221e-13	3.59661e-07	5.65163e-11	0.000601711	-4.92746e-07	-0.000221479	0.000157138
2022-03-15 11:36:01	6776869	2.23814e-10	-9.05865e-11	2.29602e-07	-8.35488e-11	1.99689e-10	1.45031e-10	-1.81173e-13	2.28454e-07	7.1289e-11	0.000634839	-7.93039e-07	-0.000365714	0.00031205
2022-03-15 11:36:17	6792021	1.59153e-10	-8.22015e-11	1.26312e-07	-1.01469e-10	2.03174e-10	1.03131e-10	-1.64403e-13	1.2568e-07	7.25331e-11	0.000820582	-1.3081e-06	-0.000807357	0.000577123
2022-03-15 11:36:32	6807174	1.19701e-10	-8.9532e-11	6.75871e-08	-1.09252e-10	2.11813e-10	7.75662e-11	-1.79064e-13	6.72492e-08	7.56172e-11	0.00115342	-2.66269e-06	-0.00162459	0.00112443
2022-03-15 11:36:47	6822837	8.60751e-11	-1.05738e-10	3.82391e-08	-1.20034e-10	2.13955e-10	5.57767e-11	-2.11476e-13	3.80479e-08	7.63819e-11	0.00146596	-5.55815e-06	-0.00315481	0.00200752
2022-03-15 11:37:03	6838241	4.66549e-11	-9.7661e-11	2.30217e-08	-1.03264e-10	1.99857e-10	3.02324e-11	-1.95322e-13	2.29066e-08	7.13489e-11	0.00131981	-8.52689e-06	-0.00450805	0.00311478
2022-03-15 11:37:18	6853644	3.12287e-11	-8.83546e-11	1.51843e-08	-1.14981e-10	1.92931e-10	2.02362e-11	-1.76709e-13	1.51084e-08	6.88764e-11	0.0013394	-1.16961e-05	-0.00761041	0.00455882
2022-03-15 11:37:34	6869047	2.01562e-11	-9.48762e-11	1.10859e-08	-1.17153e-10	2.07736e-10	1.30612e-11	-1.89752e-13	1.10305e-08	7.41618e-11	0.0011841	-1.72026e-05	-0.0106209	0.00672335
2022-03-15 11:37:49	6884451	9.40623e-12	-9.13441e-11	8.93367e-09	-1.10542e-10	1.95104e-10	6.09524e-12	-1.82688e-13	8.889e-09	6.96521e-11	0.000685705	-2.05522e-05	-0.0124358	0.00783576
2022-03-15 11:38:04	6899854	-5.06324e-12	-8.9665e-11	7.77913e-09	-1.04984e-10	2.14086e-10	-3.28098e-12	-1.7933e-13	7.74023e-09	7.64287e-11	-0.000423886	-2.31685e-05	-0.0135634	0.00987421
2022-03-15 11:38:20	6915256	-1.10832e-11	-9.73638e-11	7.04584e-09	-1.15992e-10	1.86312e-10	-7.18191e-12	-1.94728e-13	7.01061e-09	6.65134e-11	-0.00102443	-2.77761e-05	-0.0165452	0.00948753
2022-03-15 11:38:36	6931699	-9.26648e-12	-1.01131e-10	6.67363e-09	-1.16863e-10	1.64413e-10	-6.00468e-12	-2.02262e-13	6.64026e-09	5.86954e-11	-0.000904283	-3.04599e-05	-0.0175992	0.00883933
2022-03-15 11:38:52	6947631	-1.45984e-11	-9.94524e-11	6.44733e-09	-1.21474e-10	1.77451e-10	-9.45976e-12	-1.98905e-13	6.41509e-09	6.335e-11	-0.00147461	-3.10058e-05	-0.0189357	0.00987515
2022-03-15 11:39:08	6963564	-1.91242e-11	-9.58276e-11	6.3096e-09	-1.16626e-10	1.78388e-10	-1.23925e-11	-1.91655e-13	6.27805e-09	6.36845e-11	-0.00197394	-3.05278e-05	-0.0185768	0.010144
2022-03-15 11:39:24	6979497	-3.52706e-11	-9.29003e-11	6.21326e-09	-1.23323e-10	1.68621e-10	-2.28553e-11	-1.85801e-13	6.18219e-09	6.01977e-11	-0.00369696	-3.00542e-05	-0.0199481	0.00973727
2022-03-15 11:39:40	6995431	-3.85279e-11	-9.81724e-11	6.12927e-09	-1.26204e-10	1.67891e-10	-2.49661e-11	-1.96345e-13	6.09862e-09	5.99371e-11	-0.00409372	-3.21949e-05	-0.0206938	0.00982797
2022-03-15 11:39:56	7011364	-3.34002e-11	-9.14055e-11	6.06827e-09	-1.26118e-10	1.63054e-10	-2.16433e-11	-1.82811e-13	6.03793e-09	5.82103e-11	-0.00358456	-3.02771e-05	-0.0208876	0.00964077
2022-03-15 11:40:12	7027297	-4.38169e-11	-9.05558e-11	6.01032e-09	-1.22377e-10	1.77958e-10	-2.83934e-11	-1.81112e-13	5.98027e-09	6.3531e-11	-0.00474784	-3.02849e-05	-0.0204635	0.0106234
2022-03-15 11:40:28	7043231	-4.48489e-11	-9.19379e-11	5.98162e-09	-1.28548e-10	1.62401e-10	-2.90621e-11	-1.83876e-13	5.95171e-09	5.79772e-11	-0.00488298	-3.08946e-05	-0.0215985	0.00974126
2022-03-15 11:40:44	7059164	-4.81599e-11	-8.95831e-11	5.9639e-09	-1.22334e-10	1.53149e-10	-3.12076e-11	-1.79166e-13	5.93408e-09	5.46742e-11	-0.00525905	-3.01927e-05	-0.0206155	0.00921359
2022-03-15 11:41:00	7075097	-5.29221e-11	-9.86333e-11	5.9178e-09	-1.21421e-10	1.56949e-10	-3.42935e-11	-1.97267e-13	5.88821e-09	5.60308e-11	-0.0058241	-3.3502e-05	-0.020621	0.00951576
2022-03-15 11:41:16	7091031	-5.49539e-11	-9.74457e-11	5.89524e-09	-1.24173e-10	1.62432e-10	-3.56101e-11	-1.94891e-13	5.86576e-09	5.79882e-11	-0.00607084	-3.32252e-05	-0.0211691	0.00988588
2022-03-15 11:41:31	7106964	-5.25136e-11	-8.85798e-11	5.8688e-09	-1.32343e-10	1.63346e-10	-3.40288e-11	-1.7716e-13	5.83946e-09	5.83145e-11	-0.00582739	-3.03384e-05	-0.0226636	0.00998629
2022-03-15 11:41:47	7122897	-5.26211e-11	-8.79041e-11	5.86868e-09	-1.24742e-10	1.64344e-10	-3.40985e-11	-1.75808e-13	5.83934e-09	5.86708e-11	-0.00583944	-3.01076e-05	-0.0213624	0.0100475
2022-03-15 11:42:03	7138830	-5.65771e-11	-9.76914e-11	5.84325e-09	-1.29773e-10	1.65096e-10	-3.6662e-11	-1.95383e-13	5.81403e-09	5.89393e-11	-0.00630577	-3.36054e-05	-0.0223206	0.0101374
2022-03-15 11:42:19	7154764	-6.03396e-11	-9.13544e-11	5.83295e-09	-1.29343e-10	1.65027e-10	-3.91001e-11	-1.82709e-13	5.80379e-09	5.89146e-11	-0.00673699	-3.1481e-05	-0.022286	0.0101511
2022-03-15 11:42:35	7170696	-5.53409e-11	-9.1211e-11	5.82097e-09	-1.22721e-10	1.51574e-10	-3.58609e-11	-1.82422e-13	5.79187e-09	5.41119e-11	-0.0061916	-3.14962e-05	-0.0211885	0.00934274
2022-03-15 11:42:51	7186629	-6.68648e-11	-9.78752e-11	5.79569e-09	-1.23345e-10	1.42997e-10	-4.33284e-11	-1.9575e-13	5.76671e-09	5.10499e-11	-0.00751354	-3.39449e-05	-0.0213891	0.00885252
2022-03-15 11:43:07	7202562	-6.91331e-11	-9.24396e-11	5.78138e-09	-1.30891e-10	1.48718e-10	-4.47982e-11	-1.84879e-13	5.75247e-09	5.30923e-11	-0.00778765	-3.21391e-05	-0.0227539	0.00922948
2022-03-15 11:43:23	7218496	-5.89959e-11	-9.4262e-11	5.766e-09	-1.15132e-10	1.64497e-10	-3.82293e-11	-1.88524e-13	5.73717e-09	5.87254e-11	-0.00666345	-3.28601e-05	-0.0200677	0.010236
2022-03-15 11:43:39	7234429	-7.42071e-11	-1.02606e-10	5.77877e-09	-1.24549e-10	1.53486e-10	-4.80862e-11	-2.05212e-13	5.74988e-09	5.47945e-11	-0.008363	-3.56898e-05	-0.0216612	0.00952968
2022-03-15 11:43:55	7250361	-7.27343e-11	-1.02739e-10	5.74748e-09	-1.20055e-10	1.49501e-10	-4.71318e-11	-2.05478e-13	5.71874e-09	5.33719e-11	-0.00824164	-3.59306e-05	-0.0209933	0.0093328
2022-03-15 11:44:11	7266294	-8.53871e-11	-9.00131e-11	5.75696e-09	-1.18131e-10	1.39411e-10	-5.53308e-11	-1.80026e-13	5.72818e-09	4.97697e-11	-0.00965942	-3.14282e-05	-0.0206228	0.00868858
2022-03-15 11:44:27	7282227	-6.57683e-11	-9.02896e-11	5.73472e-09	-1.29978e-10	1.47712e-10	-4.26179e-11	-1.80579e-13	5.70605e-09	5.27332e-11	-0.00746889	-3.1647e-05	-0.022779	0.00924163
2022-03-15 11:44:43	7298161	-7.48521e-11	-1.00896e-10	5.71874e-09	-1.18572e-10	1.44794e-10	-4.85042e-11	-2.01792e-13	5.69015e-09	5.16915e-11	-0.00852424	-3.54634e-05	-0.0208381	0.00908438
2022-03-15 11:44:59	7314094	-6.91331e-11	-9.93495e-11	5.7189e-09	-1.29558e-10	1.44656e-10	-4.47982e-11	-1.98699e-13	5.69031e-09	5.16422e-11	-0.00787273	-3.49189e-05	-0.0227682	0.00907547
2022-03-15 11:45:15	7330027	-7.52606e-11	-8.88563e-11	5.70348e-09	-1.25721e-10	1.50061e-10	-4.87689e-11	-1.77713e-13	5.67496e-09	5.35718e-11	-0.00859369	-3.13152e-05	-0.0221536	0.00944002
2022-03-15 11:45:30	7345961	-6.31239e-11	-8.9573e-11	5.70332e-09	-1.20227e-10	1.42821e-10	-4.09043e-11	-1.79146e-13	5.6748e-09	5.09871e-11	-0.00720805	-3.15687e-05	-0.0211861	0.00898482
2022-03-15 11:45:46	7361894	-7.70881e-11	-9.63505e-11	5.69899e-09	-1.26753e-10	1.38459e-10	-4.99531e-11	-1.92701e-13	5.6705e-09	4.94299e-11	-0.0088093	-3.39831e-05	-0.0223531	0.00871703
2022-03-15 11:46:02	7377827	-7.27558e-11	-9.418e-11	5.70852e-09	-1.26559e-10	1.41523e-10	-4.71458e-11	-1.8836e-13	5.67998e-09	5.05237e-11	-0.00830034	-3.31621e-05	-0.0222816	0.00889505
2022-03-15 11:46:18	7393761	-7.31213e-11	-8.23141e-11	5.68776e-09	-1.21087e-10	1.46353e-10	-4.73826e-11	-1.64628e-13	5.65932e-09	5.2248e-11	-0.00837249	-2.90897e-05	-0.021396	0.00923221
2022-03-15 11:46:34	7409694	-6.12964e-11	-8.74536e-11	5.69793e-09	-1.26323e-10	1.64206e-10	-3.97201e-11	-1.74907e-13	5.66944e-09	5.86215e-11	-0.00700599	-3.08509e-05	-0.0222814	0.0103399
2022-03-15 11:46:50	7425625	-7.45726e-11	-9.36784e-11	5.68353e-09	-1.31827e-10	1.36363e-10	-4.8323e-11	-1.87357e-13	5.65511e-09	4.86816e-11	-0.00854502	-3.31305e-05	-0.0233111	0.00860842
2022-03-15 11:47:06	7441559	-7.94853e-11	-1.00824e-10	5.70095e-09	-1.0908e-10	1.37991e-10	-5.15065e-11	-2.01648e-13	5.67245e-09	4.92628e-11	-0.00908012	-3.55487e-05	-0.0192298	0.00868458
2022-03-15 11:47:22	7457492	-7.66581e-11	-9.61762e-11	5.68933e-09	-1.28247e-10	1.46e-10	-4.96744e-11	-1.92352e-13	5.66088e-09	5.2122e-11	-0.00877503	-3.39792e-05	-0.0226549	0.0092074
2022-03-15 11:47:38	7473426	-7.85823e-11	-8.66141e-11	5.68134e-09	-1.32536e-10	1.51191e-10	-5.09213e-11	-1.73228e-13	5.65293e-09	5.39752e-11	-0.00900795	-3.06439e-05	-0.0234455	0.00954817
2022-03-15 11:47:54	7489359	-8.62686e-11	-9.47943e-11	5.67228e-09	-1.11144e-10	1.44702e-10	-5.59021e-11	-1.89589e-13	5.64392e-09	5.16586e-11	-0.00990483	-3.35917e-05	-0.0196927	0.00915297
2022-03-15 11:48:10	7505291	-7.83673e-11	-8.8457e-11	5.66648e-09	-1.23968e-10	1.60451e-10	-5.0782e-11	-1.76914e-13	5.63815e-09	5.7281e-11	-0.00900686	-3.1378e-05	-0.0219874	0.0101595
2022-03-15 11:48:26	7521224	-7.48091e-11	-9.06991e-11	5.67025e-09	-1.30386e-10	1.42106e-10	-4.84763e-11	-1.81398e-13	5.6419e-09	5.07318e-11	-0.0085922	-3.2152e-05	-0.0231103	0.00899198
2022-03-15 11:48:42	7537155	-7.47231e-11	-9.70152e-11	5.67848e-09	-1.37245e-10	1.2764e-10	-4.84206e-11	-1.9403e-13	5.65009e-09	4.55675e-11	-0.00856988	-3.43411e-05	-0.0242908	0.00806492
2022-03-15 11:48:58	7553089	-8.95473e-11	-8.80372e-11	6.17285e-09	-1.2499e-10	1.42867e-10	-5.80267e-11	-1.76074e-13	6.14199e-09	5.10035e-11	-0.00944754	-2.86673e-05	-0.0203501	0.00830408
2022-03-15 11:49:14	7569021	-8.10333e-11	-1.0495e-10	5.33184e-09	-1.42824e-10	1.33768e-10	-5.25096e-11	-2.099e-13	5.30518e-09	4.77552e-11	-0.00989779	-3.95651e-05	-0.0269216	0.00900161
2022-03-15 11:49:29	7584954	-7.60668e-11	-1.11308e-10	5.20702e-09	-1.32988e-10	1.23102e-10	-4.92913e-11	-2.22616e-13	5.18098e-09	4.39474e-11	-0.00951388	-4.29679e-05	-0.0256685	0.00848244
2022-03-15 11:49:45	7600887	-7.30891e-11	-9.8101e-11	5.34398e-09	-1.41115e-10	1.4054e-10	-4.73617e-11	-1.96202e-13	5.31726e-09	5.01728e-11	-0.00890717	-3.68991e-05	-0.026539	0.00943583
2022-03-15 11:50:01	7616820	-8.39896e-11	-9.20915e-11	5.55194e-09	-1.2629e-10	1.36962e-10	-5.44253e-11	-1.84183e-13	5.52418e-09	4.88954e-11	-0.00985219	-3.33412e-05	-0.0228613	0.00885117
2022-03-15 11:50:17	7632754	-7.90123e-11	-1.02626e-10	5.64226e-09	-1.33332e-10	1.38199e-10	-5.12e-11	-2.05252e-13	5.61405e-09	4.9337e-11	-0.00911997	-3.65604e-05	-0.0237497	0.00878814
2022-03-15 11:50:33	7648687	-8.44948e-11	-9.1641e-11	1.31317e-08	-1.38255e-10	1.41692e-10	-5.47526e-11	-1.83282e-13	1.3066e-08	5.0584e-11	-0.00419045	-1.40274e-05	-0.0105812	0.00387141
2022-03-15 11:50:50	7665131	-6.78323e-11	-9.26239e-11	1.18697e-07	-1.09983e-10	1.16783e-10	-4.39553e-11	-1.85248e-13	1.18104e-07	4.16915e-11	-0.000372176	-1.56852e-06	-0.000931242	0.000353008
2022-03-15 11:51:05	7680794	-5.00626e-11	-1.03404e-10	2.48235e-07	-1.20604e-10	1.31226e-10	-3.24406e-11	-2.06808e-13	2.46994e-07	4.68477e-11	-0.000131342	-8.373e-07	-0.000488288	0.000189671
2022-03-15 11:51:20	7695946	-7.78083e-11	-1.04469e-10	3.12824e-07	-1.25215e-10	1.15724e-10	-5.04198e-11	-2.08938e-13	3.1126e-07	4.13135e-11	-0.000161986	-6.71265e-07	-0.000402284	0.00013273
2022-03-15 11:51:36	7711099	-7.84748e-11	-1.05615e-10	3.49643e-07	-1.20389e-10	1.02394e-10	-5.08517e-11	-2.1123e-13	3.47895e-07	3.65547e-11	-0.00014617	-6.07166e-07	-0.00034605	0.000105074
2022-03-15 11:51:51	7726251	-8.52581e-11	-1.1054e-10	3.81087e-07	-1.30827e-10	1.08897e-10	-5.52472e-11	-2.2108e-13	3.79182e-07	3.88762e-11	-0.000145701	-5.83045e-07	-0.000345025	0.000102527
2022-03-15 11:52:06	7741404	-8.58278e-11	-1.11994e-10	3.74458e-07	-1.15497e-10	9.19579e-11	-5.56164e-11	-2.23988e-13	3.72586e-07	3.2829e-11	-0.000149271	-6.01172e-07	-0.000309988	8.81112e-05
2022-03-15 11:52:21	7756556	-8.77413e-11	-1.12137e-10	3.96316e-07	-1.17217e-10	9.24421e-11	-5.68564e-11	-2.24274e-13	3.94334e-07	3.30018e-11	-0.000144183	-5.68741e-07	-0.000297253	8.369e-05
2022-03-15 11:52:36	7771709	-2.52839e-11	-1.03312e-10	4.00974e-07	-6.15544e-11	1.65719e-10	-1.6384e-11	-2.06624e-13	3.98969e-07	5.91617e-11	-4.10658e-05	-5.17895e-07	-0.000154284	0.000148286
2022-03-15 11:52:51	7786861	4.7034e-09	-9.51117e-11	3.51434e-07	1.432e-10	2.27246e-10	3.0478e-09	-1.90223e-13	3.49677e-07	8.11268e-11	0.00871606	-5.43998e-07	0.000409521	0.000232005
2022-03-15 11:53:10	7805265	8.95642e-09	-9.69238e-11	3.57974e-07	2.53667e-10	2.66661e-10	5.80376e-09	-1.93848e-13	3.56184e-07	9.5198e-11	0.0162943	-5.44234e-07	0.000712179	0.000267272
2022-03-15 11:53:24	7819247	1.077e-08	-9.73838e-11	3.59587e-07	3.03955e-10	2.62061e-10	6.97896e-09	-1.94768e-13	3.57789e-07	9.35558e-11	0.0195058	-5.44364e-07	0.000849537	0.000261483
2022-03-15 11:53:36	7831661	1.15823e-08	-8.97265e-11	3.59497e-07	3.15995e-10	2.72696e-10	7.50533e-09	-1.79453e-13	3.577e-07	9.73525e-11	0.0209822	-5.01686e-07	0.000883409	0.000272163
2022-03-15 11:53:49	7844074	1.22643e-08	-9.11906e-11	3.57078e-07	3.26552e-10	2.80536e-10	7.94727e-09	-1.82381e-13	3.55293e-07	1.00151e-10	0.0223682	-5.13327e-07	0.000919107	0.000281884
2022-03-15 11:54:01	7856486	1.23597e-08	-8.72079e-11	3.54391e-07	3.26992e-10	2.87907e-10	8.00909e-09	-1.74416e-13	3.52619e-07	1.02783e-10	0.0227131	-4.9463e-07	0.000927324	0.000291484
2022-03-15 11:54:13	7868899	1.26796e-08	-8.27339e-11	3.51883e-07	3.41999e-10	2.75222e-10	8.21638e-09	-1.65468e-13	3.50124e-07	9.82543e-11	0.0234671	-4.72598e-07	0.000976795	0.000280627
2022-03-15 11:54:26	7881311	1.25969e-08	-9.08731e-11	3.51434e-07	3.39247e-10	2.61908e-10	8.16279e-09	-1.81746e-13	3.49677e-07	9.35012e-11	0.0233438	-5.19755e-07	0.000970173	0.000267393
2022-03-15 11:54:38	7893724	1.27817e-08	-8.98084e-11	3.51793e-07	3.28519e-10	2.69571e-10	8.28254e-09	-1.79617e-13	3.50034e-07	9.62368e-11	0.0236621	-5.13141e-07	0.000938534	0.000274936
2022-03-15 11:54:51	7906136	1.05329e-08	-8.15565e-11	3.61109e-07	2.46636e-10	2.31616e-10	6.82532e-09	-1.63113e-13	3.59303e-07	8.26869e-11	0.018996	-4.5397e-07	0.000686428	0.000230131
2022-03-15 11:55:04	7919059	7.65386e-09	-9.99029e-11	4.02766e-07	1.11574e-10	2.12274e-10	4.9597e-09	-1.99806e-13	4.00752e-07	7.57818e-11	0.012376	-4.98577e-07	0.000278411	0.000189099
2022-03-15 11:55:17	7932002	3.77979e-09	-9.9381e-11	3.34682e-07	3.47439e-11	1.92824e-10	2.4493e-09	-1.98762e-13	3.33009e-07	6.88382e-11	0.00735508	-5.96867e-07	0.000104333	0.000206716
2022-03-15 11:55:29	7944946	2.34854e-09	-9.15693e-11	3.31726e-07	-2.15429e-11	1.87434e-10	1.52185e-09	-1.83139e-13	3.30067e-07	6.69139e-11	0.00461074	-5.54852e-07	-6.52682e-05	0.000202728
2022-03-15 11:55:42	7957889	1.52331e-09	-1.02565e-10	3.33787e-07	-4.22904e-11	1.72114e-10	9.87105e-10	-2.0513e-13	3.32118e-07	6.14447e-11	0.00297215	-6.17642e-07	-0.000127335	0.000185009
2022-03-15 11:55:55	7970831	1.04546e-09	-1.00282e-10	3.47851e-07	-6.39839e-11	1.78219e-10	6.77458e-10	-2.00564e-13	3.46112e-07	6.36242e-11	0.00195734	-5.79478e-07	-0.000184865	0.000183826
2022-03-15 11:56:09	7984814	6.69304e-10	-9.9821e-11	3.65051e-07	-7.56261e-11	1.53709e-10	4.33709e-10	-1.99642e-13	3.63226e-07	5.48741e-11	0.00119405	-5.49636e-07	-0.000208207	0.000151074
2022-03-15 11:56:24	7999967	4.45715e-10	-1.00773e-10	3.74995e-07	-8.21836e-11	1.47674e-10	2.88823e-10	-2.01546e-13	3.7312e-07	5.27196e-11	0.000774076	-5.40164e-07	-0.00022026	0.000141294
2022-03-15 11:56:40	8015121	2.91507e-10	-1.11626e-10	3.79563e-07	-9.35141e-11	1.55076e-10	1.88897e-10	-2.23252e-13	3.77665e-07	5.53621e-11	0.000500169	-5.91137e-07	-0.000247611	0.000146591
2022-03-15 11:56:55	8030274	1.95391e-10	-1.05708e-10	2.89263e-07	-9.77603e-11	1.87986e-10	1.26613e-10	-2.11416e-13	2.87817e-07	6.7111e-11	0.00043991	-7.34551e-07	-0.000339662	0.000233173
2022-03-15 11:57:10	8045427	1.42673e-10	-9.69543e-11	1.64206e-07	-1.02597e-10	2.02683e-10	9.24521e-11	-1.93909e-13	1.63385e-07	7.23578e-11	0.000565854	-1.18682e-06	-0.000627946	0.000442867
2022-03-15 11:57:25	8060581	1.01931e-10	-9.20198e-11	8.94933e-08	-1.03651e-10	1.95995e-10	6.60513e-11	-1.8404e-13	8.90458e-08	6.99702e-11	0.000741767	-2.0668e-06	-0.00116402	0.000785778
2022-03-15 11:57:40	8075734	7.25408e-11	-1.00517e-10	4.87091e-08	-1.08306e-10	1.97154e-10	4.70064e-11	-2.01034e-13	4.84656e-08	7.0384e-11	0.000969894	-4.14798e-06	-0.0022347	0.00145225
2022-03-15 11:57:56	8091397	4.82459e-11	-8.7812e-11	2.83911e-08	-1.08725e-10	1.93054e-10	3.12633e-11	-1.75624e-13	2.82491e-08	6.89203e-11	0.0011067	-6.21697e-06	-0.00384879	0.00243973
2022-03-15 11:58:11	8106801	2.87239e-11	-9.45076e-11	1.78612e-08	-1.23786e-10	1.84669e-10	1.86131e-11	-1.89015e-13	1.77719e-08	6.59268e-11	0.00104733	-1.06356e-05	-0.00696527	0.00370961
2022-03-15 11:58:27	8122204	1.93929e-11	-9.1129e-11	1.25046e-08	-1.15239e-10	1.93161e-10	1.25666e-11	-1.82258e-13	1.24421e-08	6.89585e-11	0.00101001	-1.46485e-05	-0.00926204	0.00554236
2022-03-15 11:58:42	8137605	7.81523e-12	-9.14874e-11	9.62625e-09	-1.24226e-10	1.78741e-10	5.06427e-12	-1.82975e-13	9.57812e-09	6.38105e-11	0.000528733	-1.91034e-05	-0.0129698	0.00666212
2022-03-15 11:58:58	8153009	-2.36499e-12	-9.71181e-11	8.09832e-09	-1.131e-10	1.89683e-10	-1.53251e-12	-1.94236e-13	8.05783e-09	6.77168e-11	-0.000190189	-2.41053e-05	-0.014036	0.00840386
2022-03-15 11:59:13	8168410	-6.62199e-12	-9.61143e-11	7.19537e-09	-1.01404e-10	1.74226e-10	-4.29105e-12	-1.92229e-13	7.15939e-09	6.21987e-11	-0.000599359	-2.68498e-05	-0.0141638	0.0086877
2022-03-15 11:59:29	8184854	-1.71354e-11	-9.50093e-11	6.7507e-09	-1.18131e-10	1.92033e-10	-1.11037e-11	-1.90019e-13	6.71695e-09	6.85558e-11	-0.00165309	-2.82894e-05	-0.017587	0.0102064
2022-03-15 11:59:45	8200787	-2.45422e-11	-9.84486e-11	6.47067e-09	-1.2528e-10	1.78849e-10	-1.59033e-11	-1.96897e-13	6.43832e-09	6.38491e-11	-0.00247011	-3.05821e-05	-0.0194585	0.00991705
2022-03-15 12:00:01	8216721	-2.59934e-11	-9.3576e-11	6.31415e-09	-1.24022e-10	1.66524e-10	-1.68437e-11	-1.87152e-13	6.28258e-09	5.94491e-11	-0.00268102	-2.9789e-05	-0.0197406	0.00946253
2022-03-15 12:00:17	8232654	-3.75604e-11	-9.1989e-11	6.21918e-09	-1.21732e-10	1.60151e-10	-2.43391e-11	-1.83978e-13	6.18808e-09	5.71739e-11	-0.00393323	-2.9731e-05	-0.019672	0.00923936
2022-03-15 12:00:33	8248587	-3.47116e-11	-9.34736e-11	6.12752e-09	-1.23173e-10	1.69888e-10	-2.24931e-11	-1.86947e-13	6.09688e-09	6.065e-11	-0.00368928	-3.06628e-05	-0.0202026	0.00994771
2022-03-15 12:00:49	8264521	-4.11831e-11	-9.9841e-11	6.09504e-09	-1.1611e-10	1.74779e-10	-2.66866e-11	-1.99682e-13	6.06456e-09	6.23961e-11	-0.00440042	-3.2926e-05	-0.0191456	0.0102886
2022-03-15 12:01:05	8280454	-4.47199e-11	-8.86822e-11	6.08621e-09	-1.17368e-10	1.56904e-10	-2.89785e-11	-1.77364e-13	6.05578e-09	5.60147e-11	-0.00478526	-2.92885e-05	-0.0193812	0.0092498
2022-03-15 12:01:21	8296387	-4.05489e-11	-9.66162e-11	6.06924e-09	-1.11531e-10	1.48372e-10	-2.62757e-11	-1.93232e-13	6.03889e-09	5.29688e-11	-0.00435108	-3.1998e-05	-0.0184688	0.00877128
2022-03-15 12:01:37	8312321	-5.65341e-11	-1.01315e-10	6.01496e-09	-1.26419e-10	1.67845e-10	-3.66341e-11	-2.0263e-13	5.98489e-09	5.99207e-11	-0.0061211	-3.3857e-05	-0.021123	0.010012
2022-03-15 12:01:53	8328254	-6.01139e-11	-9.56952e-11	5.9726e-09	-1.26613e-10	1.52772e-10	-3.89538e-11	-1.9139e-13	5.94274e-09	5.45396e-11	-0.00655486	-3.22058e-05	-0.0213055	0.00917752
2022-03-15 12:02:09	8344186	-5.63084e-11	-8.44436e-11	5.93548e-09	-1.29709e-10	1.53939e-10	-3.64878e-11	-1.68887e-13	5.9058e-09	5.49562e-11	-0.0061783	-2.85968e-05	-0.021963	0.00930546
2022-03-15 12:02:25	8360119	-5.66094e-11	-9.86743e-11	5.90398e-09	-1.30397e-10	1.48611e-10	-3.66829e-11	-1.97349e-13	5.87446e-09	5.30541e-11	-0.00624447	-3.35943e-05	-0.0221973	0.00903132
[truncated: 1,024 more rows]

## Sheet: Integration
Index	Real time	ms	Ethylene mbar	Carbon monoxide mbar	Argon mbar	Ethylene oxide mbar	Carbon dioxide mbar	Corrected Ethylene	Corrected CO	Corrected Ar	Corrected CO2	Ethylene (ć )	CO (ć )	ETO (ć )	CO2 (ć )		Time, min	Initial Time	6.4275e+07	Et integral	CO intergral	EO integral	CO2 integral
[truncated: 1,574 more rows]

[truncated: 1 more sheets: Integration processing]
