# Supplementary material for: Mechano-synthesis of a AgSrFeO3 catalyst for epoxidation of ethylene in a chemical looping set-up
Source: Royal Society of Chemistry journal article supplement (doi:10.1039/d4ma00485j), 2024-01-01
Supplement: d4ma00485j5.xlsx [file d4ma00485j5.xlsx]

## Sheet: Raw data
Real time	ms	Ethylene mbar	Carbon monoxide mbar	Argon mbar	Ethylene oxide mbar	Carbon dioxide mbar	Corrected Et	Corrected CO	Corrected Ar	Corrected EO	ć(Et)	ć (CO)	ć (EtO)
2022-03-21 11:12:26	14788	2.69717e-11	3.81982e-11	5.88332e-09	-2.22847e-11	2.89711e-10	1.74777e-11	7.63964e-15	5.88038e-09	-2.22825e-11	0.0029722	1.29917e-06	505444
2022-03-21 11:13:16	64281	2.09517e-11	5.22449e-11	5.53512e-08	9.27723e-12	4.26843e-10	1.35767e-11	1.0449e-14	5.53235e-08	9.2763e-12	0.000245406	1.8887e-07	4435.83
2022-03-21 11:13:44	92759	4.58594e-11	4.53547e-11	2.62031e-07	2.35854e-11	3.18967e-10	2.97169e-11	9.07094e-15	2.619e-07	2.3583e-11	0.000113467	3.46351e-08	433.244
2022-03-21 11:14:13	121886	2.47357e-11	2.82469e-11	3.38803e-07	1.27709e-11	2.66039e-10	1.60287e-11	5.64938e-15	3.38634e-07	1.27696e-11	4.73336e-05	1.66829e-08	139.778
2022-03-21 11:14:38	146742	3.52276e-11	2.85028e-11	3.7383e-07	3.65821e-11	2.42834e-10	2.28275e-11	5.70056e-15	3.73643e-07	3.65784e-11	6.10944e-05	1.52567e-08	163.51
2022-03-21 11:15:06	174850	7.86898e-12	2.47556e-11	3.74458e-07	4.02801e-11	8.17443e-10	5.0991e-12	4.95112e-15	3.74271e-07	4.02761e-11	1.36241e-05	1.32287e-08	36.4017
2022-03-21 11:15:41	209838	1.10127e-08	3.38982e-11	3.35758e-07	1.89608e-10	4.65012e-09	7.13623e-09	6.77964e-15	3.3559e-07	1.89589e-10	0.0212647	2.02021e-08	63365.2
2022-03-21 11:16:02	230255	1.144e-08	4.2959e-11	3.56899e-07	1.93768e-10	4.6112e-09	7.41312e-09	8.5918e-15	3.56721e-07	1.93749e-10	0.0207813	2.40855e-08	58256.6
2022-03-21 11:16:19	247421	1.20513e-08	5.26134e-11	3.66216e-07	1.84899e-10	3.91668e-09	7.80924e-09	1.05227e-14	3.66033e-07	1.84881e-10	0.0213348	2.87479e-08	58286.6
2022-03-21 11:16:36	264586	1.27905e-08	4.34913e-11	3.66753e-07	1.94843e-10	3.0884e-09	8.28824e-09	8.69826e-15	3.6657e-07	1.94824e-10	0.0226103	2.37288e-08	61680.7
2022-03-21 11:16:53	281753	1.29295e-08	5.22142e-11	3.65051e-07	1.72612e-10	2.44105e-09	8.37832e-09	1.04428e-14	3.64868e-07	1.72595e-10	0.0229626	2.86208e-08	62933.8
2022-03-21 11:17:10	298919	1.31929e-08	4.62249e-11	3.63349e-07	1.713e-10	1.97306e-09	8.549e-09	9.24498e-15	3.63167e-07	1.71283e-10	0.0235401	2.54565e-08	64818.9
2022-03-21 11:17:28	316085	1.35106e-08	5.45587e-11	3.67022e-07	1.47812e-10	1.55151e-09	8.75487e-09	1.09117e-14	3.66838e-07	1.47797e-10	0.0238657	2.97454e-08	65057.9
2022-03-21 11:17:45	333251	1.04489e-08	4.31534e-11	3.42118e-07	8.84401e-11	1.06934e-09	6.77089e-09	8.63068e-15	3.41947e-07	8.84313e-11	0.019801	2.52398e-08	57906.6
2022-03-21 11:18:05	353007	4.65182e-09	3.98772e-11	3.30651e-07	6.18124e-11	8.154e-10	3.01438e-09	7.97544e-15	3.30486e-07	6.18062e-11	0.00912106	2.41325e-08	27599
2022-03-21 11:18:24	372274	2.48313e-09	4.55799e-11	3.35578e-07	3.23144e-11	6.64717e-10	1.60907e-09	9.11598e-15	3.3541e-07	3.23112e-11	0.00479731	2.71786e-08	14302.8
2022-03-21 11:18:43	391540	1.41651e-09	3.47275e-11	3.52241e-07	2.51442e-11	5.70117e-10	9.17898e-10	6.9455e-15	3.52065e-07	2.51417e-11	0.00260719	1.97279e-08	7405.41
2022-03-21 11:19:13	421598	6.11405e-10	3.81982e-11	3.62991e-07	1.59099e-11	4.82874e-10	3.9619e-10	7.63964e-15	3.6281e-07	1.59083e-11	0.00109201	2.10569e-08	3009.86
2022-03-21 11:19:41	449705	2.8424e-10	3.69287e-11	1.96903e-07	-3.26799e-12	7.19471e-10	1.84188e-10	7.38574e-15	1.96805e-07	-3.26766e-12	0.000935891	3.75283e-08	4755.43
2022-03-21 11:20:09	477811	1.17819e-10	3.10521e-11	6.33588e-08	-2.14677e-11	7.40436e-10	7.63467e-11	6.21042e-15	6.33271e-08	-2.14656e-11	0.00120559	9.80689e-08	19037.5
2022-03-21 11:20:38	506940	7.01758e-11	4.39213e-11	2.35245e-08	-1.61572e-11	6.88736e-10	4.54739e-11	8.78426e-15	2.35127e-08	-1.61556e-11	0.00193401	3.73596e-07	82253.8
2022-03-21 11:21:07	535546	4.41286e-11	3.82904e-11	1.1423e-08	4.55799e-12	6.28466e-10	2.85953e-11	7.65808e-15	1.14173e-08	4.55753e-12	0.00250456	6.70744e-07	219366
2022-03-21 11:21:36	564153	3.87859e-11	3.34477e-11	7.77018e-09	4.89124e-12	5.83348e-10	2.51333e-11	6.68954e-15	7.76629e-09	4.89075e-12	0.0032362	8.61355e-07	416698
2022-03-21 11:22:04	592760	4.42039e-11	3.9908e-11	6.46342e-09	3.13899e-12	5.30749e-10	2.86441e-11	7.9816e-15	6.46019e-09	3.13868e-12	0.00443395	1.23551e-06	686349
2022-03-21 11:22:36	624487	2.70039e-11	3.20247e-11	6.04475e-09	-2.12849e-12	4.94376e-10	1.74985e-11	6.40494e-15	6.04173e-09	-2.12828e-12	0.00289628	1.06012e-06	479379
2022-03-21 11:23:07	655195	4.09251e-11	3.78501e-11	5.84396e-09	9.83623e-12	4.75349e-10	2.65195e-11	7.57002e-15	5.84104e-09	9.83525e-12	0.0045402	1.29601e-06	777293
2022-03-21 11:23:37	685901	3.10997e-11	3.98158e-11	5.74875e-09	1.90167e-11	4.49671e-10	2.01526e-11	7.96316e-15	5.74588e-09	1.90148e-11	0.00350732	1.38589e-06	610406
2022-03-21 11:24:08	716608	2.27577e-11	3.1349e-11	5.67954e-09	-2.05217e-11	4.23388e-10	1.4747e-11	6.2698e-15	5.6767e-09	-2.05196e-11	0.00259781	1.10448e-06	457627
2022-03-21 11:24:39	747315	1.78234e-11	4.50577e-11	5.64882e-09	-5.11699e-12	4.19725e-10	1.15496e-11	9.01154e-15	5.646e-09	-5.11648e-12	0.00204562	1.59609e-06	362313
2022-03-21 11:25:10	778021	2.02852e-11	3.79218e-11	5.59708e-09	-1.14057e-11	4.04222e-10	1.31448e-11	7.58436e-15	5.59428e-09	-1.14046e-11	0.00234969	1.35573e-06	420016
2022-03-21 11:25:40	808730	3.95276e-11	3.9478e-11	5.5825e-09	2.16289e-11	3.73569e-10	2.56139e-11	7.8956e-15	5.57971e-09	2.16267e-11	0.00459054	1.41506e-06	822721
2022-03-21 11:26:11	839436	3.06804e-11	4.10853e-11	5.53057e-09	-1.54262e-11	3.75673e-10	1.98809e-11	8.21706e-15	5.5278e-09	-1.54247e-11	0.00359653	1.4865e-06	650625
2022-03-21 11:26:42	870143	5.26749e-12	3.81675e-11	5.52719e-09	-1.92209e-11	3.76717e-10	3.41333e-12	7.6335e-15	5.52443e-09	-1.9219e-11	0.000617862	1.38177e-06	111842
2022-03-21 11:27:12	900850	1.46522e-11	3.5997e-11	5.52009e-09	7.04123e-12	3.58542e-10	9.49463e-12	7.1994e-15	5.51733e-09	7.04053e-12	0.00172087	1.30487e-06	311903
2022-03-21 11:27:43	931557	3.35721e-11	3.75839e-11	5.50794e-09	2.25319e-11	3.4747e-10	2.17547e-11	7.51678e-15	5.50519e-09	2.25296e-11	0.00395168	1.3654e-06	717810
2022-03-21 11:28:14	962265	3.91191e-11	4.21194e-11	5.48433e-09	-2.57569e-11	3.45558e-10	2.53492e-11	8.42388e-15	5.48159e-09	-2.57543e-11	0.00462442	1.53676e-06	843628
2022-03-21 11:28:44	992971	2.24997e-11	3.36013e-11	5.46203e-09	-2.30157e-11	3.45082e-10	1.45798e-11	6.72026e-15	5.4593e-09	-2.30134e-11	0.00267064	1.23097e-06	489190
2022-03-21 11:29:15	1023678	2.34349e-11	3.22704e-11	5.48761e-09	-1.55337e-11	3.46264e-10	1.51858e-11	6.45408e-15	5.48487e-09	-1.55321e-11	0.00276868	1.17671e-06	504785
2022-03-21 11:29:46	1054385	2.52194e-11	3.98466e-11	5.47226e-09	-3.31206e-11	3.41803e-10	1.63422e-11	7.96932e-15	5.46952e-09	-3.31173e-11	0.00298786	1.45704e-06	546274
2022-03-21 11:30:17	1085092	2.34457e-11	3.71539e-11	5.43621e-09	-1.36309e-11	3.33649e-10	1.51928e-11	7.43078e-15	5.43349e-09	-1.36295e-11	0.00279614	1.36759e-06	514612
2022-03-21 11:30:47	1115800	3.36044e-11	3.97339e-11	5.47328e-09	1.97477e-11	3.39008e-10	2.17757e-11	7.94678e-15	5.47054e-09	1.97457e-11	0.00398053	1.45265e-06	727629
2022-03-21 11:31:18	1146506	2.08764e-11	4.2099e-11	5.42593e-09	-3.74206e-11	3.36927e-10	1.35279e-11	8.4198e-15	5.42322e-09	-3.74169e-11	0.00249444	1.55255e-06	459956
2022-03-21 11:31:49	1177213	2.57462e-11	3.75225e-11	5.42123e-09	-7.55723e-12	3.27682e-10	1.66835e-11	7.5045e-15	5.41852e-09	-7.55647e-12	0.00307898	1.38497e-06	568234
2022-03-21 11:32:19	1207920	2.44239e-11	4.12287e-11	5.44925e-09	4.68699e-12	3.28174e-10	1.58267e-11	8.24574e-15	5.44653e-09	4.68652e-12	0.00290583	1.51395e-06	533520
2022-03-21 11:32:50	1238627	2.22202e-11	3.87204e-11	5.11377e-09	1.22334e-11	3.22176e-10	1.43987e-11	7.74408e-15	5.11121e-09	1.22322e-11	0.00281708	1.51512e-06	551157
2022-03-21 11:33:21	1269335	2.57569e-11	2.91785e-11	5.17072e-09	7.62173e-12	3.28896e-10	1.66905e-11	5.8357e-15	5.16813e-09	7.62097e-12	0.0032295	1.12917e-06	624886
2022-03-21 11:33:52	1300041	2.97344e-11	3.15537e-11	5.42135e-09	1.61572e-11	3.23206e-10	1.92679e-11	6.31074e-15	5.41864e-09	1.61556e-11	0.00355585	1.16464e-06	656226
2022-03-21 11:34:22	1330748	3.56684e-11	5.70875e-11	1.00333e-07	-1.93607e-11	3.85417e-10	2.31131e-11	1.14175e-14	1.00283e-07	-1.93588e-11	0.000230479	1.13853e-07	2298.29
2022-03-21 11:34:54	1362996	3.35399e-11	3.20349e-11	2.79409e-07	-1.39212e-11	3.19735e-10	2.17339e-11	6.40698e-15	2.79269e-07	-1.39198e-11	7.7824e-05	2.29419e-08	278.67
2022-03-21 11:35:23	1391103	1.99949e-11	2.94856e-11	3.25455e-07	1.46199e-12	3.04132e-10	1.29567e-11	5.89712e-15	3.25292e-07	1.46184e-12	3.98309e-05	1.81287e-08	122.447
2022-03-21 11:35:51	1419210	1.56734e-11	2.30664e-11	3.66305e-07	-1.62109e-11	2.75199e-10	1.01564e-11	4.61328e-15	3.66122e-07	-1.62093e-11	2.77404e-05	1.26004e-08	75.7682
2022-03-21 11:36:19	1447317	1.40964e-10	3.89968e-11	3.4812e-07	5.29436e-11	1.43164e-09	9.13447e-11	7.79936e-15	3.47946e-07	5.29383e-11	0.000262525	2.24154e-08	754.501
2022-03-21 11:36:52	1480755	9.07635e-09	4.42796e-11	3.29666e-07	1.22893e-10	2.0575e-09	5.88147e-09	8.85592e-15	3.29501e-07	1.22881e-10	0.0178496	2.68767e-08	54171.7
2022-03-21 11:37:15	1503783	1.10717e-08	4.39009e-11	3.37818e-07	1.12638e-10	1.6784e-09	7.17446e-09	8.78018e-15	3.37649e-07	1.12627e-10	0.0212483	2.60039e-08	62930.1
2022-03-21 11:37:35	1523159	1.19566e-08	4.19147e-11	3.38176e-07	1.21442e-10	1.31779e-09	7.74788e-09	8.38294e-15	3.38007e-07	1.2143e-10	0.0229222	2.48011e-08	67815.9
2022-03-21 11:37:54	1542535	1.22219e-08	4.06349e-11	3.35578e-07	1.15229e-10	1.09063e-09	7.91979e-09	8.12698e-15	3.3541e-07	1.15217e-10	0.0236123	2.423e-08	70398.1
2022-03-21 11:38:13	1561911	1.23422e-08	3.9652e-11	3.34682e-07	1.24904e-10	9.09586e-10	7.99775e-09	7.9304e-15	3.34515e-07	1.24892e-10	0.0239085	2.37072e-08	71472.2
2022-03-21 11:38:33	1581286	1.20453e-08	5.58282e-11	3.42745e-07	7.24118e-11	7.85114e-10	7.80535e-09	1.11656e-14	3.42574e-07	7.24046e-11	0.0227845	3.25934e-08	66509.7
2022-03-21 11:38:55	1603253	6.24634e-09	2.8984e-11	3.11212e-07	6.92728e-11	5.51873e-10	4.04763e-09	5.7968e-15	3.11056e-07	6.92659e-11	0.0130125	1.86358e-08	41833.3
2022-03-21 11:39:16	1624730	3.01273e-09	3.21066e-11	3.12466e-07	4.19249e-11	4.71594e-10	1.95225e-09	6.42132e-15	3.1231e-07	4.19207e-11	0.006251	2.05607e-08	20015.4
2022-03-21 11:39:38	1646206	1.59093e-09	2.95778e-11	3.32353e-07	1.85974e-11	4.32064e-10	1.03092e-09	5.91556e-15	3.32187e-07	1.85955e-11	0.00310344	1.78079e-08	9342.46
2022-03-21 11:40:07	1675223	7.02049e-10	2.04761e-11	3.50987e-07	1.67484e-11	3.68056e-10	4.54928e-10	4.09522e-15	3.50812e-07	1.67467e-11	0.00129679	1.16736e-08	3696.53
2022-03-21 11:40:35	1703330	3.75378e-10	4.26928e-11	2.4277e-07	1.75224e-11	5.97936e-10	2.43245e-10	8.53856e-15	2.42649e-07	1.75206e-11	0.00100246	3.5189e-08	4131.31
2022-03-21 11:41:03	1731436	1.65001e-10	2.37932e-11	8.16102e-08	-1.52649e-12	6.77771e-10	1.06921e-10	4.75864e-15	8.15694e-08	-1.52634e-12	0.00131079	5.83385e-08	16069.7
2022-03-21 11:41:31	1759543	8.54731e-11	3.52599e-11	2.86324e-08	-3.50449e-12	6.64449e-10	5.53866e-11	7.05198e-15	2.86181e-08	-3.50414e-12	0.00193537	2.46417e-07	67627.5
2022-03-21 11:42:00	1788670	6.07911e-11	4.28053e-11	1.3022e-08	1.55122e-11	6.13524e-10	3.93926e-11	8.56106e-15	1.30155e-08	1.55106e-11	0.0030266	6.57759e-07	232538
2022-03-21 11:42:29	1817277	4.05166e-11	2.47454e-11	8.29263e-09	1.05242e-11	5.57601e-10	2.62548e-11	4.94908e-15	8.28848e-09	1.05231e-11	0.00316762	5.97103e-07	382171
2022-03-21 11:42:57	1845885	4.73751e-11	2.72947e-11	6.64583e-09	6.99823e-12	5.11031e-10	3.06991e-11	5.45894e-15	6.64251e-09	6.99753e-12	0.00462161	8.21819e-07	695763
2022-03-21 11:43:29	1877612	3.79904e-11	3.47582e-11	6.14211e-09	2.78747e-11	4.8811e-10	2.46178e-11	6.95164e-15	6.13904e-09	2.78719e-11	0.00401004	1.13237e-06	653203
2022-03-21 11:44:00	1908320	3.44751e-11	3.63042e-11	5.93317e-09	-1.52542e-11	4.70051e-10	2.23399e-11	7.26084e-15	5.9302e-09	-1.52527e-11	0.00376713	1.22438e-06	635245
2022-03-21 11:44:31	1939026	3.70014e-11	2.24726e-11	5.84227e-09	1.85222e-11	4.30944e-10	2.39769e-11	4.49452e-15	5.83935e-09	1.85203e-11	0.00410609	7.69695e-07	703176
2022-03-21 11:45:01	1969733	1.72537e-11	4.59587e-11	5.75813e-09	8.50323e-12	4.31143e-10	1.11804e-11	9.19174e-15	5.75525e-09	8.50238e-12	0.00194264	1.5971e-06	337543
2022-03-21 11:45:32	2000440	4.11831e-11	5.1907e-11	5.70682e-09	-5.10624e-12	4.19334e-10	2.66866e-11	1.03814e-14	5.70397e-09	-5.10573e-12	0.00467861	1.82003e-06	820238
2022-03-21 11:46:03	2031147	2.62944e-11	4.46072e-11	5.66031e-09	-1.57272e-11	4.04015e-10	1.70388e-11	8.92144e-15	5.65748e-09	-1.57256e-11	0.00301172	1.57693e-06	532344
2022-03-21 11:46:33	2061854	2.54022e-11	3.80447e-11	5.64128e-09	-4.36449e-12	3.82392e-10	1.64606e-11	7.60894e-15	5.63846e-09	-4.36405e-12	0.00291935	1.34947e-06	517756
2022-03-21 11:47:04	2092561	3.91944e-11	4.92451e-11	5.60773e-09	-3.32174e-12	3.7995e-10	2.5398e-11	9.84902e-15	5.60493e-09	-3.32141e-12	0.00453137	1.75721e-06	808461
2022-03-21 11:47:35	2123268	4.00544e-11	4.63068e-11	5.57473e-09	5.46099e-12	3.76932e-10	2.59553e-11	9.26136e-15	5.57194e-09	5.46044e-12	0.00465821	1.66214e-06	836011
2022-03-21 11:48:05	2153975	3.39914e-11	4.10547e-11	5.56101e-09	-1.05672e-11	3.693e-10	2.20264e-11	8.21094e-15	5.55823e-09	-1.05661e-11	0.00396285	1.47726e-06	712970
2022-03-21 11:48:36	2184682	2.50582e-11	3.3499e-11	5.55933e-09	3.92374e-12	3.63771e-10	1.62377e-11	6.6998e-15	5.55655e-09	3.92335e-12	0.00292227	1.20575e-06	525914
2022-03-21 11:49:07	2215390	2.86702e-11	3.9693e-11	5.56244e-09	1.65012e-11	3.60907e-10	1.85783e-11	7.9386e-15	5.55966e-09	1.64995e-11	0.00334162	1.42789e-06	601048
2022-03-21 11:49:38	2246096	5.38359e-11	3.55568e-11	5.53347e-09	8.79348e-12	3.57398e-10	3.48857e-11	7.11136e-15	5.5307e-09	8.7926e-12	0.00630764	1.2858e-06	1.14048e+06
2022-03-21 11:50:08	2276803	2.27684e-11	4.49349e-11	5.52733e-09	-1.71999e-12	3.44368e-10	1.47539e-11	8.98698e-15	5.52457e-09	-1.71982e-12	0.0026706	1.62673e-06	483405
2022-03-21 11:50:39	2307510	3.10352e-11	3.87306e-11	5.52377e-09	1.61572e-11	3.4413e-10	2.01108e-11	7.74612e-15	5.52101e-09	1.61556e-11	0.0036426	1.40303e-06	659770
2022-03-21 11:51:10	2338217	3.24756e-11	4.43615e-11	5.50838e-09	-1.19109e-11	3.44636e-10	2.10442e-11	8.8723e-15	5.50563e-09	-1.19097e-11	0.00382231	1.6115e-06	694255
2022-03-21 11:51:40	2368925	1.56734e-11	4.17815e-11	5.50708e-09	1.15239e-11	3.34509e-10	1.01564e-11	8.3563e-15	5.50433e-09	1.15227e-11	0.00184516	1.51813e-06	335220
2022-03-21 11:52:11	2399631	2.11774e-11	2.47351e-11	5.53012e-09	1.54907e-11	3.33057e-10	1.3723e-11	4.94702e-15	5.52735e-09	1.54892e-11	0.00248273	8.95007e-07	449172
2022-03-21 11:52:42	2430338	2.94549e-11	3.99899e-11	5.46263e-09	-2.92507e-11	3.33257e-10	1.90868e-11	7.99798e-15	5.4599e-09	-2.92478e-11	0.00349581	1.46486e-06	640270
2022-03-21 11:53:13	2461045	2.37467e-11	5.0832e-11	5.51389e-09	1.71784e-11	3.40152e-10	1.53879e-11	1.01664e-14	5.51113e-09	1.71767e-11	0.00279214	1.8447e-06	506637
2022-03-21 11:53:43	2491752	2.04679e-11	3.2731e-11	5.26928e-09	3.93449e-12	3.25041e-10	1.32632e-11	6.5462e-15	5.26665e-09	3.9341e-12	0.00251834	1.24295e-06	478168
2022-03-21 11:54:14	2522460	2.93044e-11	3.87306e-11	5.12733e-09	-6.07374e-12	3.27859e-10	1.89893e-11	7.74612e-15	5.12477e-09	-6.07313e-12	0.00370539	1.51151e-06	723036
2022-03-21 11:54:45	2553166	1.46629e-11	3.80753e-11	5.43277e-09	-2.45422e-11	3.18806e-10	9.50156e-12	7.61506e-15	5.43005e-09	-2.45397e-11	0.00174981	1.40239e-06	322245
2022-03-21 11:55:15	2583873	1.70279e-11	3.82391e-11	4.78945e-08	9.90073e-12	3.7995e-10	1.10341e-11	7.64782e-15	4.78706e-08	9.89974e-12	0.000230498	1.5976e-07	4815.03
2022-03-21 11:55:47	2615600	2.59827e-11	2.67726e-11	2.5576e-07	4.92349e-12	3.23881e-10	1.68368e-11	5.35452e-15	2.55632e-07	4.923e-12	6.58634e-05	2.09462e-08	257.649
2022-03-21 11:56:16	2644727	2.40692e-11	2.96802e-11	3.31009e-07	3.47224e-11	3.0414e-10	1.55968e-11	5.93604e-15	3.30843e-07	3.47189e-11	4.71427e-05	1.79421e-08	142.492
2022-03-21 11:56:44	2672835	2.68104e-11	1.43332e-11	3.53495e-07	1.75224e-12	2.82202e-10	1.73731e-11	2.86664e-15	3.53318e-07	1.75206e-12	4.91714e-05	8.11348e-09	139.17
2022-03-21 11:57:12	2700941	2.62622e-11	3.10623e-11	3.67112e-07	4.67194e-11	8.59021e-10	1.70179e-11	6.21246e-15	3.66928e-07	4.67147e-11	4.63794e-05	1.6931e-08	126.399
2022-03-21 11:57:46	2734379	8.25018e-09	5.51423e-11	3.24559e-07	1.06575e-10	1.94586e-09	5.34612e-09	1.10285e-14	3.24397e-07	1.06564e-10	0.0164802	3.39968e-08	50802.6
2022-03-21 11:58:07	2755855	1.01562e-08	3.38266e-11	3.33697e-07	1.0335e-10	1.65472e-09	6.58122e-09	6.76532e-15	3.3353e-07	1.0334e-10	0.019732	2.0284e-08	59161.1
2022-03-21 11:58:30	2778882	1.15098e-08	4.8078e-11	3.36384e-07	1.32515e-10	1.26809e-09	7.45835e-09	9.6156e-15	3.36216e-07	1.32502e-10	0.0221832	2.85995e-08	65979.1
2022-03-21 11:58:50	2798259	1.19767e-08	4.10853e-11	3.34592e-07	1.30429e-10	1.04375e-09	7.7609e-09	8.21706e-15	3.34425e-07	1.30416e-10	0.0232067	2.45707e-08	69393
2022-03-21 11:59:06	2814385	1.20279e-08	3.7973e-11	3.33428e-07	1.21249e-10	8.71971e-10	7.79408e-09	7.5946e-15	3.33261e-07	1.21237e-10	0.0233873	2.27887e-08	70177
2022-03-21 11:59:25	2833761	1.23417e-08	4.46482e-11	3.35399e-07	1.03285e-10	7.49857e-10	7.99742e-09	8.92964e-15	3.35231e-07	1.03275e-10	0.0238564	2.66373e-08	71164.1
2022-03-21 11:59:45	2853136	1.06296e-08	2.91683e-11	3.1793e-07	6.87568e-11	5.66378e-10	6.88798e-09	5.83366e-15	3.17771e-07	6.87499e-11	0.0216759	1.83581e-08	68212.4
2022-03-21 12:00:07	2875104	4.22138e-09	3.81266e-11	3.09778e-07	4.18281e-11	4.80654e-10	2.73545e-09	7.62532e-15	3.09623e-07	4.18239e-11	0.00883479	2.46277e-08	28534
2022-03-21 12:00:28	2896580	2.10867e-09	3.08063e-11	3.22141e-07	7.11648e-12	4.20485e-10	1.36642e-09	6.16126e-15	3.2198e-07	7.11577e-12	0.0042438	1.91355e-08	13180.3
2022-03-21 12:00:50	2918056	1.16192e-09	2.53494e-11	3.42476e-07	1.16744e-11	3.821e-10	7.52924e-10	5.06988e-15	3.42305e-07	1.16732e-11	0.00219957	1.4811e-08	6425.77
2022-03-21 12:01:19	2947073	5.3193e-10	2.6404e-11	3.52062e-07	2.43379e-11	3.89234e-10	3.44691e-10	5.2808e-15	3.51886e-07	2.43355e-11	0.000979552	1.50071e-08	2783.72
2022-03-21 12:01:47	2975180	2.56559e-10	4.6532e-11	1.54262e-07	9.14823e-12	6.55734e-10	1.6625e-10	9.3064e-15	1.54185e-07	9.14732e-12	0.00107825	6.03587e-08	6993.25
2022-03-21 12:02:15	3003286	1.25484e-10	4.99618e-11	4.99867e-08	3.68831e-11	6.68419e-10	8.13136e-11	9.99236e-15	4.99617e-08	3.68794e-11	0.00162752	2e-07	32575.3
2022-03-21 12:02:44	3032415	7.36158e-11	2.32404e-11	1.93354e-08	2.01024e-12	6.22915e-10	4.7703e-11	4.64808e-15	1.93257e-08	2.01004e-12	0.00246837	2.40512e-07	127724
2022-03-21 12:03:13	3061021	6.27261e-11	3.78809e-11	1.02214e-08	4.29354e-11	5.91564e-10	4.06465e-11	7.57618e-15	1.02163e-08	4.29311e-11	0.0039786	7.41578e-07	389437
2022-03-21 12:03:41	3089628	5.59321e-11	4.11672e-11	7.25275e-09	1.36309e-11	5.23171e-10	3.6244e-11	8.23344e-15	7.24912e-09	1.36295e-11	0.00499978	1.13578e-06	689708
2022-03-21 12:04:13	3121355	3.81194e-11	2.97007e-11	6.38448e-09	-7.22398e-12	4.98354e-10	2.47014e-11	5.94014e-15	6.38129e-09	-7.22326e-12	0.00387091	9.30869e-07	606603
2022-03-21 12:04:44	3152062	4.24409e-11	3.3458e-11	6.04565e-09	1.32762e-11	4.69644e-10	2.75017e-11	6.6916e-15	6.04263e-09	1.32749e-11	0.00455128	1.1074e-06	753196
2022-03-21 12:05:14	3182770	3.33786e-11	3.8362e-11	5.88791e-09	4.00974e-12	4.66296e-10	2.16293e-11	7.6724e-15	5.88497e-09	4.00934e-12	0.00367535	1.30373e-06	624533
2022-03-21 12:05:45	3213476	4.18496e-11	4.12287e-11	5.80219e-09	-2.09624e-11	4.31696e-10	2.71185e-11	8.24574e-15	5.79929e-09	-2.09603e-11	0.00467618	1.42185e-06	806337
2022-03-21 12:06:16	3244183	4.06349e-11	3.76658e-11	5.77677e-09	3.13899e-12	4.13559e-10	2.63314e-11	7.53316e-15	5.77388e-09	3.13868e-12	0.00456044	1.3047e-06	789839
2022-03-21 12:06:46	3274890	3.28949e-11	2.37523e-11	5.72602e-09	2.12634e-11	4.07347e-10	2.13159e-11	4.75046e-15	5.72316e-09	2.12613e-11	0.0037245	8.30042e-07	650777
2022-03-21 12:07:17	3305597	3.47116e-11	2.88202e-11	5.71234e-09	4.37524e-12	3.99384e-10	2.24931e-11	5.76404e-15	5.70948e-09	4.3748e-12	0.00393961	1.00956e-06	690011
2022-03-21 12:07:45	3333055	2.95624e-11	3.83825e-11	5.63419e-09	1.19324e-12	3.81993e-10	1.91564e-11	7.6765e-15	5.63137e-09	1.19312e-12	0.00340173	1.36317e-06	604068
2022-03-21 12:08:15	3363761	2.14462e-11	2.4817e-11	5.63203e-09	-7.71848e-12	3.73116e-10	1.38971e-11	4.9634e-15	5.62921e-09	-7.71771e-12	0.00246875	8.81722e-07	438561
2022-03-21 12:08:46	3394468	2.89174e-11	4.72282e-11	5.62831e-09	1.49102e-11	3.76057e-10	1.87385e-11	9.44564e-15	5.6255e-09	1.49087e-11	0.00333099	1.67908e-06	592124
2022-03-21 12:09:17	3425175	3.39269e-11	2.92297e-11	5.61353e-09	5.04174e-12	3.56339e-10	2.19846e-11	5.84594e-15	5.61072e-09	5.04124e-12	0.00391832	1.04192e-06	698363
2022-03-21 12:09:47	3455882	3.05622e-11	4.08191e-11	5.59825e-09	2.79499e-13	3.63886e-10	1.98043e-11	8.16382e-15	5.59545e-09	2.79471e-13	0.00353936	1.45901e-06	632542
2022-03-21 12:10:18	3486590	3.79366e-11	3.65191e-11	5.57305e-09	1.33837e-11	3.47939e-10	2.45829e-11	7.30382e-15	5.57026e-09	1.33824e-11	0.00441324	1.31122e-06	792286
2022-03-21 12:10:49	3517296	3.63886e-11	4.78323e-11	5.57312e-09	-4.88049e-12	3.53106e-10	2.35798e-11	9.56646e-15	5.57033e-09	-4.88e-12	0.00423311	1.71739e-06	759938
2022-03-21 12:11:20	3548003	2.56709e-11	4.62761e-11	5.56092e-09	-1.26849e-12	3.55133e-10	1.66347e-11	9.25522e-15	5.55814e-09	-1.26836e-12	0.00299286	1.66517e-06	538465
2022-03-21 12:11:50	3578710	3.68509e-11	4.75866e-11	5.53728e-09	1.98229e-11	3.50672e-10	2.38794e-11	9.51732e-15	5.53451e-09	1.98209e-11	0.00431463	1.71963e-06	779587
2022-03-21 12:12:21	3609417	2.15429e-11	4.94601e-11	5.52488e-09	-1.11154e-11	3.4026e-10	1.39598e-11	9.89202e-15	5.52212e-09	-1.11143e-11	0.00252798	1.79135e-06	457792
2022-03-21 12:12:48	3636874	3.36689e-11	3.65704e-11	5.52438e-09	6.08449e-12	3.36397e-10	2.18174e-11	7.31408e-15	5.52162e-09	6.08388e-12	0.00395128	1.32463e-06	715602
2022-03-21 12:13:19	3667581	3.85064e-11	2.92194e-11	5.49153e-09	-1.34912e-11	3.41112e-10	2.49521e-11	5.84388e-15	5.48878e-09	-1.34899e-11	0.00454602	1.06469e-06	828239
2022-03-21 12:13:50	3698288	2.02099e-11	3.54544e-11	5.52238e-09	1.00834e-11	3.26484e-10	1.3096e-11	7.09088e-15	5.51962e-09	1.00824e-11	0.00237263	1.28467e-06	429854
2022-03-21 12:14:20	3728995	3.08417e-11	3.95804e-11	5.53064e-09	-6.36399e-12	3.29679e-10	1.99854e-11	7.91608e-15	5.52787e-09	-6.36335e-12	0.00361539	1.43203e-06	654029
2022-03-21 12:14:51	3759702	2.53377e-11	4.92247e-11	5.16624e-09	3.20349e-12	3.30254e-10	1.64188e-11	9.84494e-15	5.16366e-09	3.20317e-12	0.00317969	1.90658e-06	615783
2022-03-21 12:15:22	3790410	2.99064e-11	4.73409e-11	5.27649e-09	6.70798e-12	3.31714e-10	1.93793e-11	9.46818e-15	5.27385e-09	6.70731e-12	0.00367461	1.79531e-06	696760
2022-03-21 12:15:53	3821116	2.39187e-11	4.0809e-11	5.50642e-09	2.24889e-11	3.2511e-10	1.54993e-11	8.1618e-15	5.50367e-09	2.24867e-11	0.00281618	1.48297e-06	511692
2022-03-21 12:16:23	3851823	3.69369e-11	4.26518e-11	1.12157e-07	-2.23384e-11	3.70813e-10	2.39351e-11	8.53036e-15	1.12101e-07	-2.23362e-11	0.000213514	7.60954e-08	1904.66
2022-03-21 12:16:56	3884071	2.01669e-11	3.13182e-11	2.84426e-07	3.02074e-12	3.26991e-10	1.30682e-11	6.26364e-15	2.84284e-07	3.02044e-12	4.59687e-05	2.20331e-08	161.7
2022-03-21 12:17:24	3912178	3.34969e-11	2.56464e-11	3.49463e-07	3.93449e-12	2.94588e-10	2.1706e-11	5.12928e-15	3.49288e-07	3.9341e-12	6.21435e-05	1.46849e-08	177.915
2022-03-21 12:17:52	3940285	1.21367e-11	2.22269e-11	3.66395e-07	-3.59049e-12	2.72734e-10	7.86458e-12	4.44538e-15	3.66212e-07	-3.59013e-12	2.14755e-05	1.21388e-08	58.6423
2022-03-21 12:18:20	3968392	1.74246e-10	3.42258e-11	3.4382e-07	7.46263e-11	1.36644e-09	1.12911e-10	6.84516e-15	3.43648e-07	7.46188e-11	0.000328567	1.99191e-08	956.115
2022-03-21 12:18:53	4001830	8.12982e-09	3.59868e-11	3.29218e-07	1.04188e-10	1.80916e-09	5.26812e-09	7.19736e-15	3.29053e-07	1.04178e-10	0.0160099	2.18729e-08	48654.5
2022-03-21 12:19:15	4023307	1.04205e-08	3.72768e-11	3.35309e-07	1.22227e-10	1.47563e-09	6.75248e-09	7.45536e-15	3.35141e-07	1.22215e-10	0.0201482	2.22454e-08	60118.4
2022-03-21 12:19:38	4046335	1.15024e-08	4.57642e-11	3.33966e-07	1.16164e-10	1.1226e-09	7.45356e-09	9.15284e-15	3.33799e-07	1.16152e-10	0.0223295	2.74202e-08	66895
2022-03-21 12:19:57	4065711	1.19391e-08	4.27439e-11	3.3307e-07	1.17121e-10	9.1195e-10	7.73654e-09	8.54878e-15	3.32903e-07	1.17109e-10	0.0232396	2.56795e-08	69808.8
2022-03-21 12:20:17	4085086	1.21481e-08	4.76787e-11	3.32712e-07	1.08918e-10	7.81629e-10	7.87197e-09	9.53574e-15	3.32546e-07	1.08907e-10	0.0236718	2.8675e-08	71183.7
2022-03-21 12:20:36	4104463	1.17611e-08	3.67649e-11	3.76608e-07	8.15278e-11	6.24067e-10	7.62119e-09	7.35298e-15	3.7642e-07	8.15196e-11	0.0202465	1.9534e-08	53787.1
2022-03-21 12:20:58	4126430	5.66305e-09	2.45509e-11	3.0933e-07	5.09656e-11	4.93101e-10	3.66966e-09	4.91018e-15	3.09175e-07	5.09605e-11	0.0118692	1.58815e-08	38389.8
2022-03-21 12:21:19	4147906	2.75638e-09	3.01716e-11	3.13809e-07	2.47894e-11	4.29976e-10	1.78613e-09	6.03432e-15	3.13652e-07	2.47869e-11	0.00569464	1.92389e-08	18155.9
2022-03-21 12:21:41	4169383	1.45526e-09	4.58461e-11	3.34324e-07	6.98748e-12	4.00152e-10	9.43008e-10	9.16922e-15	3.34157e-07	6.98678e-12	0.00282205	2.74399e-08	8445.3
2022-03-21 12:22:09	4197360	6.80226e-10	2.02918e-11	3.52599e-07	2.48647e-11	3.59164e-10	4.40786e-10	4.05836e-15	3.52423e-07	2.48622e-11	0.00125073	1.15156e-08	3548.95
2022-03-21 12:22:37	4225467	3.62371e-10	3.14718e-11	2.23689e-07	-1.49424e-12	5.90089e-10	2.34816e-10	6.29436e-15	2.23577e-07	-1.49409e-12	0.00105027	2.8153e-08	4697.57
2022-03-21 12:23:05	4253575	1.581e-10	3.39391e-11	7.22332e-08	-9.24498e-13	6.65892e-10	1.02449e-10	6.78782e-15	7.21971e-08	-9.24406e-13	0.00141902	9.40179e-08	19654.8
2022-03-21 12:23:34	4282702	6.34679e-11	3.09087e-11	2.60873e-08	4.80524e-12	6.38319e-10	4.11272e-11	6.18174e-15	2.60743e-08	4.80476e-12	0.00157731	2.37082e-07	60493
2022-03-21 12:24:03	4311310	7.30138e-11	2.63937e-11	1.22796e-08	-1.58884e-11	5.90749e-10	4.73129e-11	5.27874e-15	1.22735e-08	-1.58868e-11	0.0038549	4.30094e-07	314084
2022-03-21 12:24:31	4339916	5.62761e-11	3.38061e-11	8.05801e-09	-1.58239e-11	5.53762e-10	3.64669e-11	6.76122e-15	8.05398e-09	-1.58223e-11	0.00452781	8.39488e-07	562183
2022-03-21 12:25:00	4368523	3.96029e-11	3.14207e-11	6.64963e-09	5.67599e-12	5.11061e-10	2.56627e-11	6.28414e-15	6.64631e-09	5.67542e-12	0.00386119	9.45509e-07	580954
2022-03-21 12:25:32	4400250	3.74959e-11	3.28539e-11	6.2e-09	8.53548e-12	4.75134e-10	2.42973e-11	6.57078e-15	6.1969e-09	8.53463e-12	0.00392089	1.06033e-06	632717
2022-03-21 12:26:02	4430957	5.44164e-11	4.11058e-11	6.01339e-09	1.62969e-11	4.49172e-10	3.52618e-11	8.22116e-15	6.01038e-09	1.62953e-11	0.00586682	1.36783e-06	976114
2022-03-21 12:26:33	4461665	4.62786e-11	3.10726e-11	5.90279e-09	-3.88074e-12	4.32641e-10	2.99885e-11	6.21452e-15	5.89984e-09	-3.88035e-12	0.00508294	1.05334e-06	861539
2022-03-21 12:27:04	4492371	2.51119e-11	3.24751e-11	5.82734e-09	2.47894e-11	4.22328e-10	1.62725e-11	6.49502e-15	5.82443e-09	2.47869e-11	0.00279384	1.11513e-06	479676
2022-03-21 12:27:35	4523078	4.43544e-11	4.61225e-11	5.77686e-09	1.51359e-11	4.15049e-10	2.87417e-11	9.2245e-15	5.77397e-09	1.51344e-11	0.0049778	1.5976e-06	862110
2022-03-21 12:28:05	4553785	3.05299e-11	4.65423e-11	5.73832e-09	-1.75224e-12	4.00006e-10	1.97834e-11	9.30846e-15	5.73545e-09	-1.75206e-12	0.00344931	1.62297e-06	601403
2022-03-21 12:28:36	4584492	4.48704e-11	4.25085e-11	5.67902e-09	-3.12824e-12	3.79835e-10	2.9076e-11	8.5017e-15	5.67618e-09	-3.12793e-12	0.00512246	1.49779e-06	902449
2022-03-21 12:29:07	4615200	3.61091e-11	3.39596e-11	5.67138e-09	-2.06399e-12	3.66006e-10	2.33987e-11	6.79192e-15	5.66854e-09	-2.06378e-12	0.00412781	1.19818e-06	728196
2022-03-21 12:29:37	4645906	1.37277e-11	2.82878e-11	5.63361e-09	-1.64474e-11	3.60247e-10	8.89555e-12	5.65756e-15	5.63079e-09	-1.64458e-11	0.0015798	1.00475e-06	280565
2022-03-21 12:30:05	4673363	2.87992e-11	4.78834e-11	5.63649e-09	2.46712e-11	3.64148e-10	1.86619e-11	9.57668e-15	5.63367e-09	2.46687e-11	0.00331256	1.6999e-06	587993
2022-03-21 12:30:36	4704070	2.73264e-11	3.57513e-11	5.62947e-09	-1.95649e-12	3.56354e-10	1.77075e-11	7.15026e-15	5.62666e-09	-1.95629e-12	0.00314708	1.27078e-06	559315
2022-03-21 12:31:06	4734777	2.84229e-11	3.87409e-11	5.59651e-09	-3.86999e-13	3.56876e-10	1.8418e-11	7.74818e-15	5.59371e-09	-3.8696e-13	0.00329263	1.38516e-06	588631
2022-03-21 12:31:37	4765485	2.54989e-11	2.87485e-11	5.60113e-09	3.10674e-12	3.32236e-10	1.65233e-11	5.7497e-15	5.59833e-09	3.10643e-12	0.00295147	1.02704e-06	527205
2022-03-21 12:32:08	4796191	2.70362e-11	3.75532e-11	5.5779e-09	-1.21152e-11	3.37496e-10	1.75195e-11	7.51064e-15	5.57511e-09	-1.2114e-11	0.00314244	1.34717e-06	563655
2022-03-21 12:32:38	4826898	2.91324e-11	2.12951e-11	5.5646e-09	1.07284e-11	3.30616e-10	1.88778e-11	4.25902e-15	5.56182e-09	1.07273e-11	0.00339418	7.6576e-07	610264
2022-03-21 12:33:09	4857605	2.52732e-11	3.17891e-11	5.57666e-09	2.83799e-11	3.37726e-10	1.6377e-11	6.35782e-15	5.57387e-09	2.83771e-11	0.00293818	1.14065e-06	527134
2022-03-21 12:33:40	4888312	3.58296e-11	3.12158e-11	5.55192e-09	-1.72429e-11	3.36129e-10	2.32176e-11	6.24316e-15	5.54914e-09	-1.72412e-11	0.00418399	1.12507e-06	753989
2022-03-21 12:34:11	4919020	1.67914e-11	3.44204e-11	5.50963e-09	-1.88124e-11	3.21156e-10	1.08808e-11	6.88408e-15	5.50688e-09	-1.88105e-11	0.00197586	1.25009e-06	358799
2022-03-21 12:34:41	4949726	2.09302e-11	3.26799e-11	5.5278e-09	5.04174e-12	3.27897e-10	1.35628e-11	6.53598e-15	5.52504e-09	5.04124e-12	0.00245478	1.18298e-06	444302
2022-03-21 12:35:12	4980433	3.34432e-11	4.07782e-11	5.52753e-09	-7.32073e-12	3.32374e-10	2.16712e-11	8.15564e-15	5.52477e-09	-7.32e-12	0.00392255	1.4762e-06	709995
2022-03-21 12:35:43	5011140	2.07904e-11	5.1088e-11	5.33224e-09	-3.34324e-12	3.22776e-10	1.34722e-11	1.02176e-14	5.32957e-09	-3.34291e-12	0.00252782	1.91715e-06	474300
2022-03-21 12:36:13	5041847	2.56494e-11	3.37958e-11	5.1502e-09	-7.85823e-12	3.31161e-10	1.66208e-11	6.75916e-15	5.14762e-09	-7.85744e-12	0.00322883	1.31306e-06	627247
2022-03-21 12:36:44	5072555	2.97129e-11	4.34913e-11	5.48387e-09	-7.96573e-12	3.17692e-10	1.9254e-11	8.69826e-15	5.48113e-09	-7.96493e-12	0.00351277	1.58695e-06	640885
2022-03-21 12:37:15	5103261	3.37334e-11	4.55696e-11	4.62775e-08	-4.09466e-11	3.73738e-10	2.18592e-11	9.11392e-15	4.62544e-08	-4.09425e-11	0.000472588	1.97039e-07	10217.1
2022-03-21 12:37:46	5134990	3.37549e-11	3.07961e-11	2.56298e-07	-1.86727e-11	3.12333e-10	2.18732e-11	6.15922e-15	2.5617e-07	-1.86708e-11	8.53854e-05	2.40435e-08	333.316
2022-03-21 12:38:16	5164117	7.86898e-12	1.5009e-11	3.19812e-07	-1.18249e-11	2.96922e-10	5.0991e-12	3.0018e-15	3.19652e-07	-1.18237e-11	1.5952e-05	9.39083e-09	49.9043
2022-03-21 12:38:44	5192225	1.71892e-11	3.94166e-11	3.65409e-07	-9.25573e-12	2.88821e-10	1.11386e-11	7.88332e-15	3.65226e-07	-9.2548e-12	3.04978e-05	2.15848e-08	83.5039
2022-03-21 12:39:12	5220331	2.75414e-11	1.90428e-11	3.58422e-07	8.28823e-12	7.44886e-10	1.78468e-11	3.80856e-15	3.58243e-07	8.2874e-12	4.98177e-05	1.06312e-08	139.061
2022-03-21 12:39:42	5250519	6.50735e-09	3.89661e-11	3.20259e-07	7.22721e-11	1.82594e-09	4.21676e-09	7.79322e-15	3.20099e-07	7.22649e-11	0.0131733	2.43463e-08	41153.9
2022-03-21 12:40:03	5271995	9.34707e-09	4.15461e-11	3.33697e-07	1.14455e-10	1.63409e-09	6.0569e-09	8.30922e-15	3.3353e-07	1.14444e-10	0.01816	2.4913e-08	54447.8
2022-03-21 12:40:27	5295022	1.10786e-08	2.55747e-11	3.36384e-07	1.20593e-10	1.31701e-09	7.17893e-09	5.11494e-15	3.36216e-07	1.20581e-10	0.0213522	1.52133e-08	63507.3
2022-03-21 12:40:43	5311148	1.15891e-08	4.49553e-11	3.32622e-07	1.14229e-10	1.04956e-09	7.50974e-09	8.99106e-15	3.32456e-07	1.14218e-10	0.0225887	2.70444e-08	67944.9
2022-03-21 12:41:02	5330524	1.19264e-08	3.9181e-11	3.31458e-07	1.088e-10	8.51536e-10	7.72831e-09	7.8362e-15	3.31292e-07	1.08789e-10	0.0233278	2.36534e-08	70414.4
2022-03-21 12:41:21	5349900	1.21138e-08	3.50756e-11	3.31009e-07	1.06263e-10	7.13591e-10	7.84974e-09	7.01512e-15	3.30843e-07	1.06252e-10	0.0237265	2.12037e-08	71715
2022-03-21 12:41:41	5369276	1.02648e-08	3.02842e-11	3.73562e-07	9.67928e-11	5.77212e-10	6.65159e-09	6.05684e-15	3.73375e-07	9.67831e-11	0.0178148	1.62219e-08	47712.8
2022-03-21 12:41:59	5387992	4.96531e-09	2.88611e-11	3.08434e-07	4.81921e-11	4.73391e-10	3.21752e-09	5.77222e-15	3.0828e-07	4.81873e-11	0.010437	1.8724e-08	33855.7
2022-03-21 12:42:21	5409470	2.44845e-09	3.38061e-11	3.14437e-07	2.32952e-11	4.25208e-10	1.5866e-09	6.76122e-15	3.1428e-07	2.32929e-11	0.00504835	2.15134e-08	16063.2
2022-03-21 12:42:42	5430945	1.31674e-09	3.71232e-11	3.34951e-07	1.85759e-11	3.80142e-10	8.53248e-10	7.42464e-15	3.34784e-07	1.8574e-11	0.00254865	2.21774e-08	7612.84
2022-03-21 12:43:11	5459963	6.03009e-10	2.3179e-11	3.52868e-07	6.95523e-12	3.33526e-10	3.9075e-10	4.6358e-15	3.52692e-07	6.95453e-12	0.00110791	1.31441e-08	3141.29
2022-03-21 12:43:40	5488070	3.20134e-10	2.77861e-11	2.02547e-07	-1.56197e-11	6.04026e-10	2.07447e-10	5.55722e-15	2.02446e-07	-1.56181e-11	0.0010247	2.74504e-08	5061.62
2022-03-21 12:44:08	5516176	1.47457e-10	4.23958e-11	6.51169e-08	1.12337e-11	6.75651e-10	9.55521e-11	8.47916e-15	6.50843e-08	1.12326e-11	0.00146813	1.3028e-07	22557.3
2022-03-21 12:44:37	5545305	7.43683e-11	3.92834e-11	2.39562e-08	5.97699e-12	6.23629e-10	4.81907e-11	7.85668e-15	2.39442e-08	5.97639e-12	0.00201262	3.28124e-07	84054.6
2022-03-21 12:45:05	5573911	4.72246e-11	3.59766e-11	1.16407e-08	2.47249e-13	5.77197e-10	3.06015e-11	7.19532e-15	1.16349e-08	2.47224e-13	0.00263016	6.18427e-07	226058
2022-03-21 12:45:34	5602518	5.36424e-11	2.32507e-11	7.8654e-09	2.96484e-11	5.34089e-10	3.47603e-11	4.65014e-15	7.86147e-09	2.96454e-11	0.0044216	5.9151e-07	562440
2022-03-21 12:46:03	5631125	4.01081e-11	3.4451e-11	6.60314e-09	9.90073e-12	5.04581e-10	2.599e-11	6.8902e-15	6.59984e-09	9.89974e-12	0.00393798	1.044e-06	596679
2022-03-21 12:46:34	5662852	4.76224e-11	4.34401e-11	6.16579e-09	1.23732e-11	4.71609e-10	3.08593e-11	8.68802e-15	6.16271e-09	1.2372e-11	0.00500743	1.40977e-06	812537
2022-03-21 12:47:05	5693560	3.06697e-11	2.15613e-11	5.99053e-09	-1.39749e-12	4.32756e-10	1.9874e-11	4.31226e-15	5.98753e-09	-1.39735e-12	0.00331922	7.20206e-07	554356
2022-03-21 12:47:36	5724266	3.09707e-11	5.50091e-11	5.87644e-09	8.81498e-12	4.3251e-10	2.0069e-11	1.10018e-14	5.8735e-09	8.8141e-12	0.00341687	1.87313e-06	581744
2022-03-21 12:48:06	5754973	3.19919e-11	4.11263e-11	5.82583e-09	1.91672e-11	4.12684e-10	2.07308e-11	8.22526e-15	5.82292e-09	1.91653e-11	0.0035602	1.41257e-06	611412
2022-03-21 12:48:37	5785680	3.30024e-11	3.98875e-11	5.76779e-09	-1.34374e-12	4.13659e-10	2.13856e-11	7.9775e-15	5.76491e-09	-1.34361e-12	0.00370961	1.3838e-06	643481
2022-03-21 12:49:08	5816387	4.09144e-11	4.36551e-11	5.73146e-09	-4.00974e-12	3.89771e-10	2.65125e-11	8.73102e-15	5.72859e-09	-4.00934e-12	0.0046281	1.52411e-06	807895
2022-03-21 12:49:39	5847095	3.16157e-11	3.57923e-11	5.69776e-09	-5.53624e-12	3.79167e-10	2.0487e-11	7.15846e-15	5.69491e-09	-5.53569e-12	0.00359742	1.25699e-06	631690
2022-03-21 12:50:09	5877801	2.83154e-11	4.26723e-11	5.69854e-09	2.02099e-11	3.74137e-10	1.83484e-11	8.53446e-15	5.69569e-09	2.02079e-11	0.00322145	1.49841e-06	565594
2022-03-21 12:50:40	5908508	3.35614e-11	3.53623e-11	5.64927e-09	9.88998e-13	3.62412e-10	2.17478e-11	7.07246e-15	5.64645e-09	9.88899e-13	0.00385159	1.25255e-06	682126
2022-03-21 12:51:11	5939215	2.53162e-11	3.50142e-11	5.65176e-09	7.76148e-12	3.60109e-10	1.64049e-11	7.00284e-15	5.64893e-09	7.7607e-12	0.00290407	1.23967e-06	514092
2022-03-21 12:51:41	5969922	2.50904e-11	4.83544e-11	5.61753e-09	1.25237e-11	3.45451e-10	1.62586e-11	9.67088e-15	5.61472e-09	1.25224e-11	0.00289571	1.72241e-06	515735
2022-03-21 12:52:12	6000630	2.84229e-11	2.91785e-11	5.61801e-09	2.00379e-11	3.44337e-10	1.8418e-11	5.8357e-15	5.6152e-09	2.00359e-11	0.00328003	1.03927e-06	584134
2022-03-21 12:52:43	6031336	2.99064e-11	4.36449e-11	5.58823e-09	-9.69648e-12	3.40168e-10	1.93793e-11	8.72898e-15	5.58544e-09	-9.69551e-12	0.00346962	1.56281e-06	621191
2022-03-21 12:53:14	6062043	2.14462e-11	3.03764e-11	5.62132e-09	2.52624e-11	3.30446e-10	1.38971e-11	6.07528e-15	5.61851e-09	2.52599e-11	0.00247346	1.0813e-06	440234
2022-03-21 12:53:44	6092750	1.97369e-11	3.24444e-11	5.57302e-09	-1.63399e-12	3.32359e-10	1.27895e-11	6.48888e-15	5.57023e-09	-1.63383e-12	0.00229605	1.16492e-06	412199
2022-03-21 12:54:12	6120206	1.91457e-11	2.90659e-11	5.55143e-09	-2.61762e-11	3.24634e-10	1.24064e-11	5.81318e-15	5.54865e-09	-2.61736e-11	0.00223593	1.04767e-06	402968
2022-03-21 12:54:42	6150915	1.84362e-11	3.0315e-11	5.5611e-09	2.53699e-12	3.22999e-10	1.19467e-11	6.063e-15	5.55832e-09	2.53674e-12	0.00214933	1.0908e-06	386687
2022-03-21 12:55:13	6181621	2.61547e-11	3.11953e-11	5.54767e-09	-8.41723e-12	3.17761e-10	1.69482e-11	6.23906e-15	5.5449e-09	-8.41639e-12	0.00305655	1.12519e-06	551236
2022-03-21 12:55:44	6212328	3.57436e-11	4.4167e-11	5.5638e-09	1.39749e-13	3.24787e-10	2.31619e-11	8.8334e-15	5.56102e-09	1.39735e-13	0.00416504	1.58845e-06	748970
2022-03-21 12:56:15	6243035	6.82623e-12	4.2703e-11	5.55214e-09	4.12906e-11	3.21562e-10	4.4234e-12	8.5406e-15	5.54936e-09	4.12865e-11	0.0007971	1.53902e-06	143638
2022-03-21 12:56:45	6273742	1.52112e-11	3.39596e-11	5.29263e-09	1.94144e-11	3.14368e-10	9.85686e-12	6.79192e-15	5.28998e-09	1.94125e-11	0.00186331	1.28392e-06	352233
2022-03-21 12:57:16	6304450	3.46256e-11	3.54442e-11	5.22219e-09	1.12767e-11	3.19881e-10	2.24374e-11	7.08884e-15	5.21958e-09	1.12756e-11	0.0042987	1.35812e-06	823572
2022-03-21 12:57:47	6335156	2.72619e-11	3.12056e-11	5.51332e-09	1.43297e-11	3.09569e-10	1.76657e-11	6.24112e-15	5.51056e-09	1.43283e-11	0.00320579	1.13257e-06	581754
2022-03-21 12:58:17	6365863	1.66839e-11	4.5969e-11	6.47154e-08	5.62224e-12	3.63219e-10	1.08112e-11	9.1938e-15	6.4683e-08	5.62168e-12	0.000167141	1.42136e-07	2584
2022-03-21 12:58:49	6397590	2.58537e-11	3.42668e-11	2.67585e-07	1.55444e-11	3.17808e-10	1.67532e-11	6.85336e-15	2.67451e-07	1.55428e-11	6.26402e-05	2.56247e-08	234.212
2022-03-21 12:59:18	6426717	7.84748e-12	2.87588e-11	3.23395e-07	1.75439e-11	2.87823e-10	5.08517e-12	5.75176e-15	3.23233e-07	1.75421e-11	1.57322e-05	1.77945e-08	48.6713
2022-03-21 12:59:46	6454825	3.74099e-12	1.48451e-11	3.64245e-07	3.27659e-11	2.81189e-10	2.42416e-12	2.96902e-15	3.64063e-07	3.27626e-11	6.65863e-06	8.15524e-09	18.2898
2022-03-21 13:00:14	6482931	2.67782e-11	3.33044e-11	3.54749e-07	5.14816e-11	9.29693e-10	1.73523e-11	6.66088e-15	3.54572e-07	5.14765e-11	4.89387e-05	1.87857e-08	138.022
2022-03-21 13:00:48	6516369	7.33679e-09	4.06656e-11	3.28322e-07	1.23291e-10	1.81526e-09	4.75424e-09	8.13312e-15	3.28158e-07	1.23279e-10	0.0144877	2.47842e-08	44148.5
2022-03-21 13:01:09	6537845	9.75674e-09	3.87101e-11	3.33338e-07	1.17658e-10	1.53521e-09	6.32237e-09	7.74202e-15	3.33171e-07	1.17646e-10	0.0189763	2.32374e-08	56956.7
2022-03-21 13:01:32	6560871	1.11289e-08	4.49963e-11	3.34055e-07	1.2327e-10	1.16734e-09	7.21153e-09	8.99926e-15	3.33888e-07	1.23258e-10	0.0215986	2.69529e-08	64688.3
2022-03-21 13:01:52	6580248	1.16335e-08	3.84747e-11	3.29038e-07	1.14756e-10	9.30564e-10	7.53851e-09	7.69494e-15	3.28873e-07	1.14745e-10	0.0229222	2.33979e-08	69699.2
2022-03-21 13:02:11	6599624	1.18793e-08	2.64551e-11	3.29576e-07	9.72013e-11	7.77414e-10	7.69779e-09	5.29102e-15	3.29411e-07	9.71916e-11	0.0233683	1.60621e-08	70939.7
2022-03-21 13:02:31	6619000	1.19257e-08	3.69901e-11	3.35668e-07	9.72228e-11	6.79153e-10	7.72785e-09	7.39802e-15	3.355e-07	9.72131e-11	0.0230338	2.20507e-08	68655.2
2022-03-21 13:02:52	6640966	6.69787e-09	4.80677e-11	3.07987e-07	3.86676e-11	4.96826e-10	4.34022e-09	9.61354e-15	3.07833e-07	3.86637e-11	0.0140993	3.12297e-08	45801.7
2022-03-21 13:03:14	6662444	3.05679e-09	2.95675e-11	3.08793e-07	-1.06209e-11	4.3509e-10	1.9808e-09	5.9135e-15	3.08639e-07	-1.06198e-11	0.00641786	1.91599e-08	20794.1
2022-03-21 13:03:35	6683920	1.61322e-09	3.86896e-11	3.29934e-07	-5.37499e-12	3.91591e-10	1.04537e-09	7.73792e-15	3.29769e-07	-5.37445e-12	0.00317	2.34647e-08	9612.78
2022-03-21 13:03:57	6705396	9.10072e-10	2.94242e-11	3.47134e-07	2.15537e-11	3.59817e-10	5.89727e-10	5.88484e-15	3.4696e-07	2.15515e-11	0.00169969	1.69611e-08	4898.81
2022-03-21 13:04:26	6734413	4.24484e-10	3.30485e-11	3.16855e-07	1.04489e-11	4.66157e-10	2.75066e-10	6.6097e-15	3.16697e-07	1.04479e-11	0.000868546	2.08708e-08	2742.52
2022-03-21 13:04:54	6762520	1.92295e-10	2.97416e-11	1.14128e-07	1.70494e-11	6.42127e-10	1.24607e-10	5.94832e-15	1.14071e-07	1.70477e-11	0.00109237	5.21458e-08	9576.2
2022-03-21 13:05:22	6790626	9.52018e-11	1.60635e-11	3.79368e-08	1.26527e-11	6.21694e-10	6.16908e-11	3.2127e-15	3.79178e-08	1.26514e-11	0.00162696	8.47279e-08	42907.5
2022-03-21 13:05:51	6819755	6.91653e-11	3.71437e-11	1.58019e-08	5.05249e-12	5.8754e-10	4.48191e-11	7.42874e-15	1.5794e-08	5.05198e-12	0.00283773	4.70352e-07	179671
2022-03-21 13:06:20	6848361	4.94391e-11	2.36602e-11	9.19e-09	-2.45744e-11	5.41016e-10	3.20365e-11	4.73204e-15	9.1854e-09	-2.45719e-11	0.00348777	5.15169e-07	379707
2022-03-21 13:06:48	6876968	4.66441e-11	3.49425e-11	6.98581e-09	3.56899e-11	5.08213e-10	3.02254e-11	6.9885e-15	6.98232e-09	3.56863e-11	0.00432885	1.00089e-06	619973
2022-03-21 13:07:20	6908695	3.96566e-11	3.98977e-11	6.35231e-09	4.80524e-12	4.71509e-10	2.56975e-11	7.97954e-15	6.34913e-09	4.80476e-12	0.0040474	1.25679e-06	637473
2022-03-21 13:07:51	6939402	5.77059e-11	2.99054e-11	6.03596e-09	-1.69849e-12	4.4736e-10	3.73934e-11	5.98108e-15	6.03294e-09	-1.69832e-12	0.00619821	9.91404e-07	1.02739e+06
2022-03-21 13:08:22	6970110	3.27981e-11	4.4812e-11	5.90329e-09	-1.01372e-11	4.40396e-10	2.12532e-11	8.9624e-15	5.90034e-09	-1.01362e-11	0.00360203	1.51896e-06	610478
2022-03-21 13:08:52	7000816	4.15486e-11	2.5718e-11	5.84373e-09	-5.89099e-12	4.09597e-10	2.69235e-11	5.1436e-15	5.84081e-09	-5.8904e-12	0.00460955	8.80632e-07	789197
2022-03-21 13:09:23	7031523	2.74339e-11	3.02023e-11	5.78944e-09	3.59049e-12	3.95937e-10	1.77772e-11	6.04046e-15	5.78655e-09	3.59013e-12	0.00307216	1.04388e-06	530914
2022-03-21 13:09:54	7062230	2.46067e-11	4.51601e-11	5.72444e-09	-1.39427e-11	3.85509e-10	1.59451e-11	9.03202e-15	5.72158e-09	-1.39413e-11	0.00278684	1.57859e-06	487076
2022-03-21 13:10:24	7092937	2.83154e-11	4.62863e-11	5.71466e-09	-4.94499e-12	3.80511e-10	1.83484e-11	9.25726e-15	5.7118e-09	-4.9445e-12	0.00321236	1.62072e-06	562408
2022-03-21 13:10:55	7123645	2.39079e-11	2.38751e-11	5.70682e-09	5.33199e-12	3.57997e-10	1.54923e-11	4.77502e-15	5.70397e-09	5.33146e-12	0.00271606	8.3714e-07	476171
2022-03-21 13:11:26	7154351	2.09302e-11	3.49323e-11	5.66391e-09	3.89364e-11	3.56646e-10	1.35628e-11	6.98646e-15	5.66108e-09	3.89325e-11	0.00239579	1.23412e-06	423204
2022-03-21 13:11:57	7185058	1.73074e-11	5.17125e-11	5.64515e-09	1.58024e-12	3.60999e-10	1.12152e-11	1.03425e-14	5.64233e-09	1.58008e-12	0.00198769	1.83302e-06	352282
2022-03-21 13:12:27	7215765	3.14867e-11	4.01025e-11	5.61751e-09	-9.02998e-13	3.47915e-10	2.04034e-11	8.0205e-15	5.6147e-09	-9.02908e-13	0.00363392	1.42848e-06	647215
2022-03-21 13:12:58	7246472	1.88232e-11	3.70413e-11	5.61008e-09	-1.85437e-11	3.43799e-10	1.21974e-11	7.40826e-15	5.60727e-09	-1.85418e-11	0.00217529	1.32119e-06	387940
2022-03-21 13:13:29	7277180	2.38972e-11	3.21577e-11	5.59877e-09	5.88024e-12	3.31759e-10	1.54854e-11	6.43154e-15	5.59597e-09	5.87965e-12	0.00276724	1.14932e-06	494506
2022-03-21 13:13:59	7307886	9.69648e-12	3.14513e-11	5.62198e-09	2.44454e-11	3.24111e-10	6.28332e-12	6.29026e-15	5.61917e-09	2.4443e-11	0.00111819	1.11943e-06	198996
2022-03-21 13:14:30	7338593	3.27551e-11	3.94677e-11	5.57765e-09	4.39674e-12	3.33595e-10	2.12253e-11	7.89354e-15	5.57486e-09	4.3963e-12	0.00380732	1.41592e-06	682945
2022-03-21 13:15:01	7369300	1.50499e-11	3.94063e-11	5.58178e-09	4.89339e-11	3.29126e-10	9.75234e-12	7.88126e-15	5.57899e-09	4.8929e-11	0.00174805	1.41267e-06	313327
2022-03-21 13:15:32	7400007	2.39079e-11	3.81266e-11	5.55513e-09	1.67484e-11	3.19082e-10	1.54923e-11	7.62532e-15	5.55235e-09	1.67467e-11	0.00279023	1.37335e-06	502530
2022-03-21 13:15:59	7427465	2.73802e-11	3.39904e-11	5.53568e-09	3.64424e-12	3.17301e-10	1.77424e-11	6.79808e-15	5.53291e-09	3.64388e-12	0.0032067	1.22866e-06	579568
2022-03-21 13:16:30	7458171	1.98014e-11	4.50577e-11	5.54059e-09	-1.46414e-11	3.1889e-10	1.28313e-11	9.01154e-15	5.53782e-09	-1.46399e-11	0.00231703	1.62727e-06	418402
2022-03-21 13:17:00	7488878	2.97344e-11	4.5631e-11	5.56003e-09	2.97667e-11	3.09837e-10	1.92679e-11	9.1262e-15	5.55725e-09	2.97637e-11	0.00346716	1.64222e-06	623899
2022-03-21 13:17:31	7519585	3.86246e-11	4.78015e-11	6.40078e-09	-6.18124e-12	3.20234e-10	2.50287e-11	9.5603e-15	6.39758e-09	-6.18062e-12	0.00391222	1.49436e-06	611516
2022-03-21 13:18:02	7550292	2.82509e-11	3.93449e-11	5.12362e-09	8.29898e-12	3.15658e-10	1.83066e-11	7.86898e-15	5.12106e-09	8.29815e-12	0.00357477	1.53659e-06	698052
2022-03-21 13:18:33	7581000	2.79392e-11	3.22909e-11	5.39551e-09	1.47489e-11	3.13869e-10	1.81046e-11	6.45818e-15	5.39281e-09	1.47474e-11	0.00335717	1.19755e-06	622527
2022-03-21 13:19:03	7611706	2.76704e-11	2.5974e-11	5.96213e-09	-3.62596e-11	3.3136e-10	1.79304e-11	5.1948e-15	5.95915e-09	-3.6256e-11	0.00300889	8.71735e-07	504919
2022-03-21 13:19:34	7642413	3.10137e-11	3.80856e-11	2.26824e-07	-1.07499e-12	3.19927e-10	2.00969e-11	7.61712e-15	2.26711e-07	-1.07488e-12	8.86455e-05	3.35984e-08	391.007
2022-03-21 13:20:06	7674661	2.20697e-11	3.56694e-11	3.1587e-07	-2.98849e-12	2.98911e-10	1.43012e-11	7.13388e-15	3.15712e-07	-2.98819e-12	4.52981e-05	2.25962e-08	143.479
2022-03-21 13:20:34	7702768	2.80467e-11	2.48478e-11	3.42208e-07	-2.34349e-12	2.67666e-10	1.81743e-11	4.96956e-15	3.42037e-07	-2.34326e-12	5.31354e-05	1.45293e-08	155.35
2022-03-21 13:21:02	7730875	1.54584e-11	3.9867e-11	3.71501e-07	-8.06248e-13	2.97283e-10	1.0017e-11	7.9734e-15	3.71315e-07	-8.06167e-13	2.69772e-05	2.14734e-08	72.6531
2022-03-21 13:21:30	7758982	2.80747e-09	3.20451e-11	3.38534e-07	6.67896e-11	1.66158e-09	1.81924e-09	6.40902e-15	3.38365e-07	6.67829e-11	0.00537657	1.89412e-08	15889.9
2022-03-21 13:22:04	7792420	9.22447e-09	6.16536e-11	3.32532e-07	1.29096e-10	1.60331e-09	5.97746e-09	1.23307e-14	3.32366e-07	1.29083e-10	0.0179846	3.70999e-08	54110.8
2022-03-21 13:22:27	7815448	1.10167e-08	4.19966e-11	3.35041e-07	1.46941e-10	1.23059e-09	7.13882e-09	8.39932e-15	3.34873e-07	1.46926e-10	0.021318	2.50821e-08	63659.8
2022-03-21 13:22:46	7834824	1.15521e-08	3.6683e-11	3.31458e-07	1.07532e-10	9.79329e-10	7.48576e-09	7.3366e-15	3.31292e-07	1.07521e-10	0.0225956	2.21454e-08	68204.5
2022-03-21 13:23:06	7854200	1.18586e-08	3.3458e-11	3.29845e-07	1.19206e-10	8.10714e-10	7.68437e-09	6.6916e-15	3.2968e-07	1.19194e-10	0.0233086	2.02973e-08	70700.6
2022-03-21 13:23:25	7873576	1.2042e-08	3.40723e-11	3.3092e-07	1.06973e-10	6.84904e-10	7.80322e-09	6.81446e-15	3.30755e-07	1.06962e-10	0.0235922	2.06028e-08	71328.3
2022-03-21 13:23:44	7892951	9.83559e-09	3.1308e-11	3.16945e-07	6.47471e-11	5.26849e-10	6.37346e-09	6.2616e-15	3.16787e-07	6.47406e-11	0.0201191	1.9766e-08	63510
2022-03-21 13:24:06	7914918	3.99783e-09	2.88611e-11	3.06912e-07	2.93474e-11	4.42869e-10	2.59059e-09	5.77222e-15	3.06759e-07	2.93445e-11	0.00844506	1.88168e-08	27530
2022-03-21 13:24:28	7936395	2.02434e-09	3.29051e-11	3.21783e-07	6.50374e-11	4.0006e-10	1.31177e-09	6.58102e-15	3.21622e-07	6.50309e-11	0.00407861	2.0462e-08	12681.4
2022-03-21 13:24:49	7957871	1.08457e-09	1.5828e-11	3.42297e-07	1.62324e-11	3.60262e-10	7.02801e-10	3.1656e-15	3.42126e-07	1.62308e-11	0.00205422	9.25274e-09	6004.28
2022-03-21 13:25:18	7986888	5.26985e-10	2.56259e-11	3.53674e-07	6.98748e-13	3.75297e-10	3.41486e-10	5.12518e-15	3.53497e-07	6.98678e-13	0.000966023	1.44985e-08	2732.76
2022-03-21 13:25:46	8014994	2.52226e-10	3.65909e-11	1.53366e-07	4.07424e-12	6.23629e-10	1.63442e-10	7.31818e-15	1.53289e-07	4.07383e-12	0.00106624	4.7741e-08	6955.7
2022-03-21 13:26:15	8043101	1.22291e-10	3.66932e-11	4.92993e-08	1.68989e-11	6.44185e-10	7.92446e-11	7.33864e-15	4.92747e-08	1.68972e-11	0.00160822	1.48933e-07	32637.9
2022-03-21 13:26:44	8072230	8.07323e-11	3.13899e-11	1.92458e-08	1.14917e-11	5.9872e-10	5.23145e-11	6.27798e-15	1.92362e-08	1.14906e-11	0.00271959	3.26363e-07	141379
2022-03-21 13:27:12	8100836	6.06191e-11	2.98747e-11	1.01682e-08	4.93424e-12	5.54606e-10	3.92812e-11	5.97494e-15	1.01631e-08	4.93375e-12	0.00386507	5.87904e-07	380304
2022-03-21 13:27:41	8129443	4.68591e-11	3.0315e-11	7.30001e-09	5.35349e-12	5.11729e-10	3.03647e-11	6.063e-15	7.29636e-09	5.35295e-12	0.00416162	8.30962e-07	570370
2022-03-21 13:28:09	8157920	4.94069e-11	2.91888e-11	6.4769e-09	2.10807e-11	4.90299e-10	3.20157e-11	5.83776e-15	6.47366e-09	2.10786e-11	0.00494553	9.01771e-07	763946
2022-03-21 13:28:40	8188627	3.94954e-11	4.48428e-11	6.12249e-09	1.36417e-11	4.48213e-10	2.5593e-11	8.96856e-15	6.11943e-09	1.36403e-11	0.00418226	1.46559e-06	683439
2022-03-21 13:29:11	8219335	3.90009e-11	3.34682e-11	5.98907e-09	7.70773e-12	4.26482e-10	2.52726e-11	6.69364e-15	5.98608e-09	7.70696e-12	0.0042219	1.1182e-06	705286
2022-03-21 13:29:42	8250041	4.55369e-11	3.86077e-11	5.90372e-09	6.66498e-12	4.12791e-10	2.95079e-11	7.72154e-15	5.90077e-09	6.66431e-12	0.00500069	1.30857e-06	847464
2022-03-21 13:30:12	8280748	4.57949e-11	4.6102e-11	5.83013e-09	8.29898e-12	4.02256e-10	2.96751e-11	9.2204e-15	5.82721e-09	8.29815e-12	0.0050925	1.5823e-06	873917
2022-03-21 13:30:43	8311455	3.21962e-11	4.17713e-11	5.76954e-09	-1.78557e-11	3.87491e-10	2.08631e-11	8.35426e-15	5.76666e-09	-1.78539e-11	0.00361789	1.44872e-06	627381
2022-03-21 13:31:14	8342162	2.60472e-11	3.16561e-11	5.72839e-09	-1.24592e-11	3.75704e-10	1.68786e-11	6.33122e-15	5.72553e-09	-1.2458e-11	0.00294795	1.10579e-06	514879
2022-03-21 13:31:43	8371830	4.64291e-11	4.14642e-11	5.69943e-09	-8.41723e-12	3.62865e-10	3.00861e-11	8.29284e-15	5.69658e-09	-8.41639e-12	0.00528142	1.45576e-06	927122
2022-03-21 13:32:14	8402536	2.19407e-11	3.38982e-11	5.66532e-09	6.29949e-12	3.64263e-10	1.42176e-11	6.77964e-15	5.66249e-09	6.29886e-12	0.00251084	1.19729e-06	443416
2022-03-21 13:32:45	8433243	2.28867e-11	3.82085e-11	5.646e-09	1.56197e-11	3.44268e-10	1.48306e-11	7.6417e-15	5.64318e-09	1.56181e-11	0.00262806	1.35415e-06	465705
2022-03-21 13:33:15	8463950	2.05432e-11	6.16536e-11	5.64029e-09	5.46099e-12	3.45796e-10	1.3312e-11	1.23307e-14	5.63747e-09	5.46044e-12	0.00236134	2.18728e-06	418866
2022-03-21 13:33:46	8494657	3.52599e-12	3.50551e-11	5.64594e-09	9.22348e-12	3.36704e-10	2.28484e-12	7.01102e-15	5.64312e-09	9.22256e-12	0.00040489	1.2424e-06	71749.3
2022-03-21 13:34:17	8525365	2.28437e-11	3.42258e-11	5.62898e-09	2.23384e-11	3.33902e-10	1.48027e-11	6.84516e-15	5.62617e-09	2.23362e-11	0.00263105	1.21667e-06	467645
2022-03-21 13:34:48	8556071	2.36822e-11	4.42796e-11	5.57857e-09	-2.67782e-11	3.32643e-10	1.53461e-11	8.85592e-15	5.57578e-09	-2.67755e-11	0.00275227	1.58828e-06	493612
2022-03-21 13:35:18	8586778	2.94442e-11	9.25522e-12	5.59536e-09	2.27577e-11	2.97881e-10	1.90798e-11	1.85104e-15	5.59256e-09	2.27554e-11	0.00341165	3.30983e-07	610033
2022-03-21 13:35:49	8617485	3.95384e-11	2.99566e-11	5.58432e-09	1.94144e-11	3.20364e-10	2.56209e-11	5.99132e-15	5.58153e-09	1.94125e-11	0.0045903	1.07342e-06	822409
2022-03-21 13:36:20	8648192	1.59637e-11	4.42387e-11	5.55497e-09	-6.22424e-12	3.20495e-10	1.03445e-11	8.84774e-15	5.55219e-09	-6.22362e-12	0.00186313	1.59356e-06	335567
2022-03-21 13:36:50	8678900	4.33654e-11	3.77785e-11	5.53792e-09	4.71924e-12	3.20679e-10	2.81008e-11	7.5557e-15	5.53515e-09	4.71877e-12	0.00507679	1.36504e-06	917190
2022-03-21 13:37:21	8709606	3.45181e-11	2.64756e-11	5.54202e-09	-1.33729e-11	3.15296e-10	2.23677e-11	5.29512e-15	5.53925e-09	-1.33716e-11	0.00403804	9.55927e-07	728988
2022-03-21 13:37:52	8740313	1.99304e-11	4.0338e-11	5.55672e-09	3.52491e-11	3.14214e-10	1.29149e-11	8.0676e-15	5.55394e-09	3.52456e-11	0.00232536	1.45259e-06	418686
2022-03-21 13:38:23	8771020	1.56089e-11	4.15358e-11	5.52441e-09	-3.01967e-11	3.09116e-10	1.01146e-11	8.30716e-15	5.52165e-09	-3.01937e-11	0.0018318	1.50447e-06	331749
2022-03-21 13:38:52	8800687	2.89282e-11	4.12696e-11	5.19336e-09	-6.35324e-12	3.11304e-10	1.87455e-11	8.25392e-15	5.19076e-09	-6.3526e-12	0.00361131	1.59012e-06	695719
2022-03-21 13:39:23	8831395	2.41659e-11	3.86999e-11	5.31142e-09	9.72873e-12	3.07756e-10	1.56595e-11	7.73998e-15	5.30876e-09	9.72776e-12	0.00294975	1.45796e-06	555637
2022-03-21 13:39:54	8862101	3.18844e-11	5.17125e-11	5.55153e-09	2.34242e-11	3.10904e-10	2.06611e-11	1.03425e-14	5.54875e-09	2.34219e-11	0.00372355	1.86393e-06	671061
2022-03-21 13:40:24	8892808	3.40989e-11	2.75507e-11	1.12874e-07	1.27924e-12	3.32681e-10	2.20961e-11	5.51014e-15	1.12818e-07	1.27911e-12	0.000195857	4.88412e-08	1736.05
2022-03-21 13:40:56	8924016	1.49317e-11	2.50526e-11	2.78962e-07	-2.01239e-11	2.98481e-10	9.67574e-12	5.01052e-15	2.78823e-07	-2.01219e-11	3.47022e-05	1.79703e-08	124.46
2022-03-21 13:41:24	8952123	2.82617e-11	2.54826e-11	3.46866e-07	-8.75048e-12	2.86556e-10	1.83136e-11	5.09652e-15	3.46693e-07	-8.7496e-12	5.28237e-05	1.47004e-08	152.365
2022-03-21 13:41:52	8980230	1.69419e-11	2.95164e-11	3.51883e-07	-2.65524e-12	2.61386e-10	1.09784e-11	5.90328e-15	3.51707e-07	-2.65497e-12	3.12145e-05	1.67847e-08	88.7513
2022-03-21 13:42:20	9008337	1.11466e-10	3.64168e-11	3.60662e-07	3.88826e-11	1.23164e-09	7.223e-11	7.28336e-15	3.60482e-07	3.88787e-11	0.000200371	2.02045e-08	555.842
2022-03-21 13:42:53	9041775	7.46891e-09	3.16663e-11	3.29666e-07	1.45393e-10	1.73495e-09	4.83985e-09	6.33326e-15	3.29501e-07	1.45378e-10	0.0146884	1.92208e-08	44577.8
2022-03-21 13:43:14	9062211	9.94893e-09	2.53392e-11	3.34592e-07	1.22023e-10	1.44574e-09	6.44691e-09	5.06784e-15	3.34425e-07	1.22011e-10	0.0192776	1.51539e-08	57644.1
2022-03-21 13:43:37	9085238	1.12565e-08	4.03585e-11	3.32263e-07	9.24606e-11	1.0812e-09	7.29421e-09	8.0717e-15	3.32097e-07	9.24514e-11	0.0219641	2.43053e-08	66137.7
2022-03-21 13:43:56	9104615	1.15951e-08	2.98951e-11	3.29128e-07	8.73543e-11	8.78593e-10	7.51362e-09	5.97902e-15	3.28963e-07	8.73456e-11	0.0228403	1.81753e-08	69431.1
2022-03-21 13:44:15	9123991	1.18746e-08	2.9025e-11	3.28233e-07	1.035e-10	7.35257e-10	7.69474e-09	5.805e-15	3.28069e-07	1.0349e-10	0.0234546	1.76945e-08	71493.1
2022-03-21 13:44:35	9143366	1.1366e-08	4.22423e-11	3.66843e-07	5.87164e-11	6.04525e-10	7.36517e-09	8.44846e-15	3.6666e-07	5.87105e-11	0.0200872	2.30417e-08	54784.4
2022-03-21 13:44:57	9165333	5.53385e-09	3.00078e-11	3.08076e-07	4.35051e-11	4.75064e-10	3.58593e-09	6.00156e-15	3.07922e-07	4.35007e-11	0.0116456	1.94905e-08	37820
2022-03-21 13:45:18	9186810	2.69247e-09	2.9885e-11	3.1148e-07	2.20912e-11	4.14611e-10	1.74472e-09	5.977e-15	3.11324e-07	2.2089e-11	0.00560419	1.91986e-08	18001.1
2022-03-21 13:45:40	9208286	1.42004e-09	4.14847e-11	3.32801e-07	1.21797e-11	3.81256e-10	9.20186e-10	8.29694e-15	3.32635e-07	1.21785e-11	0.00276636	2.49431e-08	8316.5
2022-03-21 13:46:09	9237303	6.53566e-10	1.77426e-11	3.54212e-07	2.18654e-11	3.2759e-10	4.23511e-10	3.54852e-15	3.54035e-07	2.18632e-11	0.00119624	1.00231e-08	3378.88
2022-03-21 13:46:37	9265410	3.35248e-10	2.29742e-11	2.22077e-07	2.14999e-11	5.72152e-10	2.17241e-10	4.59484e-15	2.21966e-07	2.14978e-11	0.000978712	2.07007e-08	4409.29
2022-03-21 13:47:05	9293516	1.53155e-10	3.23215e-11	7.10462e-08	4.62249e-12	6.43939e-10	9.92444e-11	6.4643e-15	7.10107e-08	4.62203e-12	0.0013976	9.10328e-08	19681.5
2022-03-21 13:47:34	9322645	8.90851e-11	2.74278e-11	2.5576e-08	1.94359e-11	6.06974e-10	5.77271e-11	5.48556e-15	2.55632e-08	1.9434e-11	0.00225821	2.14588e-07	88338.3
2022-03-21 13:48:03	9351251	5.96839e-11	5.36782e-11	1.2143e-08	2.96162e-11	5.74525e-10	3.86752e-11	1.07356e-14	1.21369e-08	2.96132e-11	0.00318657	8.84543e-07	262552
2022-03-21 13:48:31	9379858	5.47496e-11	4.64399e-11	8.02163e-09	1.68989e-11	5.28615e-10	3.54777e-11	9.28798e-15	8.01762e-09	1.68972e-11	0.00442497	1.15845e-06	551906
2022-03-21 13:49:00	9408465	5.44594e-11	4.81496e-11	6.66869e-09	-3.67649e-12	4.91543e-10	3.52897e-11	9.62992e-15	6.66536e-09	-3.67612e-12	0.00529449	1.44477e-06	794330
2022-03-21 13:49:32	9440192	2.81434e-11	3.47685e-11	6.22901e-09	-2.38649e-12	4.55277e-10	1.82369e-11	6.9537e-15	6.2259e-09	-2.38625e-12	0.0029292	1.1169e-06	470487
2022-03-21 13:50:01	9469860	4.14841e-11	3.32942e-11	6.01611e-09	1.96832e-11	4.29799e-10	2.68817e-11	6.65884e-15	6.0131e-09	1.96812e-11	0.00447052	1.10739e-06	743463
2022-03-21 13:50:32	9500566	3.29917e-11	3.04992e-11	5.92926e-09	2.13494e-11	4.14289e-10	2.13786e-11	6.09984e-15	5.9263e-09	2.13473e-11	0.00360742	1.02928e-06	608714
2022-03-21 13:51:03	9531273	3.54749e-11	4.65115e-11	5.82469e-09	-3.04869e-11	4.01204e-10	2.29877e-11	9.3023e-15	5.82178e-09	-3.04839e-11	0.00394858	1.59785e-06	678242
2022-03-21 13:51:33	9561980	3.38194e-11	4.64194e-11	5.77044e-09	-4.78374e-12	3.8994e-10	2.1915e-11	9.28388e-15	5.76755e-09	-4.78326e-12	0.0037997	1.60967e-06	658806
2022-03-21 13:52:04	9592687	4.34514e-11	3.52087e-11	5.76826e-09	7.51423e-12	3.75466e-10	2.81565e-11	7.04174e-15	5.76538e-09	7.51348e-12	0.00488372	1.22138e-06	847078
2022-03-21 13:52:32	9620145	3.16587e-11	2.25135e-11	5.68858e-09	6.56824e-12	3.61337e-10	2.05148e-11	4.5027e-15	5.68574e-09	6.56758e-12	0.00360812	7.91929e-07	634592
2022-03-21 13:53:02	9650851	3.43139e-11	3.17994e-11	5.68811e-09	6.33174e-12	3.55149e-10	2.22354e-11	6.35988e-15	5.68527e-09	6.33111e-12	0.00391106	1.11866e-06	687929
2022-03-21 13:53:32	9680518	1.89952e-11	3.57718e-11	5.66512e-09	-9.92223e-12	3.57429e-10	1.23089e-11	7.15436e-15	5.66229e-09	-9.92124e-12	0.00217384	1.26351e-06	383915
2022-03-21 13:53:59	9707975	1.38459e-11	2.34964e-11	5.66072e-09	-9.90073e-12	3.45611e-10	8.97214e-12	4.69928e-15	5.65789e-09	-9.89974e-12	0.00158578	8.30571e-07	280277
2022-03-21 13:54:30	9738682	1.34697e-11	3.41849e-11	5.61353e-09	-8.90098e-12	3.3596e-10	8.72837e-12	6.83698e-15	5.61072e-09	-8.90009e-12	0.00155566	1.21856e-06	277265
2022-03-21 13:55:01	9769390	2.15752e-11	5.43642e-12	5.60435e-09	2.13279e-11	3.07011e-10	1.39807e-11	1.08728e-15	5.60155e-09	2.13258e-11	0.00249587	1.94104e-07	445568
2022-03-21 13:55:32	9800097	2.58859e-11	2.69978e-11	5.60465e-09	1.03414e-11	3.24711e-10	1.67741e-11	5.39956e-15	5.60185e-09	1.03404e-11	0.00299438	9.63889e-07	534534
2022-03-21 13:56:02	9830805	1.85759e-11	2.47045e-11	5.5998e-09	3.08202e-11	3.20779e-10	1.20372e-11	4.9409e-15	5.597e-09	3.08171e-11	0.00215065	8.82776e-07	384250
2022-03-21 13:56:33	9861511	2.81542e-11	4.14334e-11	5.58113e-09	1.80062e-11	3.17454e-10	1.82439e-11	8.28668e-15	5.57834e-09	1.80044e-11	0.00327049	1.48551e-06	586284
2022-03-21 13:57:03	9891178	2.66599e-11	2.7264e-11	5.55497e-09	7.48198e-12	3.21432e-10	1.72756e-11	5.4528e-15	5.55219e-09	7.48123e-12	0.00311149	9.82099e-07	560408
2022-03-21 13:57:33	9921885	3.01322e-11	5.39444e-11	5.57531e-09	5.26749e-12	3.22614e-10	1.95257e-11	1.07889e-14	5.57252e-09	5.26696e-12	0.00350392	1.93609e-06	628785
2022-03-21 13:58:04	9952592	1.28569e-11	5.35144e-11	5.52753e-09	-1.05994e-11	3.21486e-10	8.33127e-12	1.07029e-14	5.52477e-09	-1.05983e-11	0.00150799	1.93725e-06	272950
2022-03-21 13:58:35	9983300	3.48944e-11	3.66318e-11	5.56091e-09	2.68319e-11	3.13009e-10	2.26116e-11	7.32636e-15	5.55813e-09	2.68292e-11	0.0040682	1.31813e-06	731937
2022-03-21 13:59:02	10010756	2.26932e-11	3.5823e-11	5.53458e-09	-1.14809e-11	3.12433e-10	1.47052e-11	7.1646e-15	5.53181e-09	-1.14798e-11	0.0026583	1.29516e-06	480547
2022-03-21 13:59:33	10041463	2.33167e-11	4.3737e-11	6.26073e-09	5.70824e-12	3.06674e-10	1.51092e-11	8.7474e-15	6.2576e-09	5.70767e-12	0.00241454	1.39788e-06	385857
2022-03-21 14:00:04	10072170	2.67674e-11	4.5969e-11	5.16443e-09	1.05672e-11	3.05146e-10	1.73453e-11	9.1938e-15	5.16185e-09	1.05661e-11	0.00336028	1.78111e-06	650985
2022-03-21 14:00:31	10099627	4.38599e-12	3.80856e-11	5.38614e-09	-2.30049e-12	3.08586e-10	2.84212e-12	7.61712e-15	5.38345e-09	-2.30026e-12	0.000527937	1.41492e-06	98066.7
2022-03-21 14:01:02	10130335	2.08442e-11	3.43896e-11	5.69009e-09	9.40623e-12	3.20334e-10	1.3507e-11	6.87792e-15	5.68724e-09	9.40529e-12	0.00237497	1.20936e-06	417596
2022-03-21 14:01:33	10161041	4.28924e-11	4.87434e-11	2.19031e-07	-1.58132e-11	3.16856e-10	2.77943e-11	9.74868e-15	2.18921e-07	-1.58116e-11	0.00012696	4.45305e-08	579.934
2022-03-21 14:02:05	10193290	2.38112e-11	3.63349e-11	3.14616e-07	3.70874e-12	2.87485e-10	1.54297e-11	7.26698e-15	3.14459e-07	3.70837e-12	4.90674e-05	2.31095e-08	156.038
2022-03-21 14:02:33	10221396	3.65929e-11	2.61173e-11	3.40416e-07	7.84748e-13	2.66906e-10	2.37122e-11	5.22346e-15	3.40246e-07	7.8467e-13	6.96914e-05	1.5352e-08	204.827
2022-03-21 14:02:58	10246253	1.16852e-11	1.55107e-11	3.73293e-07	4.49349e-12	2.5191e-10	7.57201e-12	3.10214e-15	3.73106e-07	4.49304e-12	2.02945e-05	8.31436e-09	54.3934
2022-03-21 14:03:26	10274360	9.5463e-10	3.6468e-11	3.44626e-07	9.13533e-11	1.57745e-09	6.186e-10	7.2936e-15	3.44454e-07	9.13442e-11	0.00179589	2.11744e-08	5213.73
2022-03-21 14:03:59	10307797	8.40242e-09	3.73996e-11	3.32801e-07	1.18088e-10	1.66334e-09	5.44477e-09	7.47992e-15	3.32635e-07	1.18076e-10	0.0163686	2.24869e-08	49209
2022-03-21 14:04:21	10329275	1.04842e-08	3.76044e-11	3.35758e-07	1.03769e-10	1.37779e-09	6.79376e-09	7.52088e-15	3.3559e-07	1.03759e-10	0.0202442	2.24109e-08	60324.3
2022-03-21 14:04:41	10349051	1.13398e-08	5.04123e-11	3.31547e-07	1.17594e-10	1.04859e-09	7.34819e-09	1.00825e-14	3.31381e-07	1.17582e-10	0.0221744	3.04256e-08	66915.2
2022-03-21 14:05:00	10368426	1.17429e-08	3.85566e-11	3.29128e-07	8.49463e-11	8.56529e-10	7.6094e-09	7.71132e-15	3.28963e-07	8.49378e-11	0.0231314	2.34413e-08	70316.2
2022-03-21 14:05:19	10387803	1.1956e-08	4.27951e-11	3.28859e-07	1.11015e-10	7.18393e-10	7.74749e-09	8.55902e-15	3.28695e-07	1.11004e-10	0.0235705	2.60394e-08	71709.4
2022-03-21 14:05:39	10407179	1.07169e-08	3.88944e-11	3.77503e-07	7.72386e-11	5.55889e-10	6.94455e-09	7.77888e-15	3.77314e-07	7.72309e-11	0.0184052	2.06164e-08	48779.5
2022-03-21 14:06:01	10429145	4.89225e-09	3.22601e-11	3.07808e-07	3.12609e-11	4.60276e-10	3.17018e-09	6.45202e-15	3.07654e-07	3.12578e-11	0.0103044	2.09717e-08	33493.3
2022-03-21 14:06:22	10450621	2.40566e-09	2.43666e-11	3.14078e-07	4.89124e-12	4.08944e-10	1.55887e-09	4.87332e-15	3.13921e-07	4.89075e-12	0.0049658	1.5524e-08	15818.6
2022-03-21 14:06:44	10472098	1.27533e-09	2.79909e-11	3.37459e-07	4.46124e-12	3.72371e-10	8.26414e-10	5.59818e-15	3.3729e-07	4.46079e-12	0.00245016	1.65975e-08	7264.24
2022-03-21 14:07:09	10497865	6.36979e-10	1.45175e-11	3.55645e-07	-1.85974e-12	3.31729e-10	4.12762e-10	2.9035e-15	3.55467e-07	-1.85955e-12	0.00116118	8.16812e-09	3266.64
2022-03-21 14:07:37	10525971	3.39161e-10	4.1157e-11	2.19837e-07	-5.43949e-12	5.80529e-10	2.19776e-10	8.2314e-15	2.19727e-07	-5.43895e-12	0.00100022	3.74619e-08	4552.12
2022-03-21 14:08:06	10554078	1.51521e-10	2.89226e-11	7.01179e-08	-6.66498e-12	6.43931e-10	9.81856e-11	5.78452e-15	7.00828e-08	-6.66431e-12	0.00140099	8.25383e-08	19990.5
2022-03-21 14:08:35	10583205	8.59461e-11	2.29947e-11	2.53498e-08	-1.98337e-11	5.928e-10	5.56931e-11	4.59894e-15	2.53371e-08	-1.98317e-11	0.00219808	1.8151e-07	86753.4
2022-03-21 14:09:03	10611811	6.59404e-11	3.66625e-11	1.20483e-08	-1.05349e-11	5.54929e-10	4.27294e-11	7.3325e-15	1.20423e-08	-1.05338e-11	0.00354828	6.08897e-07	294652
2022-03-21 14:09:32	10640420	5.49216e-11	4.6317e-11	8.03731e-09	-1.39104e-11	5.24169e-10	3.55892e-11	9.2634e-15	8.03329e-09	-1.3909e-11	0.00443021	1.15313e-06	551482
2022-03-21 14:10:01	10669026	3.87859e-11	3.97544e-11	6.68263e-09	3.25724e-12	4.83311e-10	2.51333e-11	7.95088e-15	6.67929e-09	3.25691e-12	0.00376287	1.19038e-06	563363
2022-03-21 14:10:32	10700755	3.11534e-11	4.57744e-11	6.18977e-09	-3.58404e-11	4.50946e-10	2.01874e-11	9.15488e-15	6.18668e-09	-3.58368e-11	0.00326305	1.47977e-06	527431
2022-03-21 14:11:03	10731461	3.71949e-11	4.42591e-11	6.0181e-09	-1.54584e-11	4.34852e-10	2.41023e-11	8.85182e-15	6.01509e-09	-1.54569e-11	0.00400697	1.4716e-06	666153
2022-03-21 14:11:34	10762168	2.92077e-11	3.23113e-11	5.93129e-09	-1.15024e-12	3.99531e-10	1.89266e-11	6.46226e-15	5.92832e-09	-1.15012e-12	0.00319257	1.09007e-06	538528
2022-03-21 14:12:04	10792875	4.32256e-11	3.72972e-11	5.87804e-09	3.13899e-12	4.03899e-10	2.80102e-11	7.45944e-15	5.8751e-09	3.13868e-12	0.00476761	1.26967e-06	811494
2022-03-21 14:12:32	10820332	3.91729e-11	4.02356e-11	5.77579e-09	-1.40717e-11	3.95069e-10	2.5384e-11	8.04712e-15	5.7729e-09	-1.40703e-11	0.0043971	1.39395e-06	761680
2022-03-21 14:13:03	10851040	1.63507e-11	2.37318e-11	5.7633e-09	-1.10939e-11	3.69499e-10	1.05953e-11	4.74636e-15	5.76042e-09	-1.10928e-11	0.00183932	8.23961e-07	319303
2022-03-21 14:13:33	10881746	3.31959e-11	2.67521e-11	5.72283e-09	3.80549e-12	3.5878e-10	2.15109e-11	5.35042e-15	5.71997e-09	3.80511e-12	0.00376068	9.35393e-07	657464
2022-03-21 14:14:04	10912453	3.12502e-11	4.29282e-11	5.68398e-09	2.49507e-11	3.6242e-10	2.02501e-11	8.58564e-15	5.68114e-09	2.49482e-11	0.00356445	1.51125e-06	627418
2022-03-21 14:14:35	10943160	1.63722e-11	3.83006e-11	5.66709e-09	2.22417e-11	3.58135e-10	1.06092e-11	7.66012e-15	5.66426e-09	2.22395e-11	0.00187301	1.35236e-06	330671
2022-03-21 14:15:02	10970617	2.56387e-11	3.77375e-11	5.66882e-09	1.01802e-11	3.42963e-10	1.66139e-11	7.5475e-15	5.66599e-09	1.01792e-11	0.00293221	1.33207e-06	517512
2022-03-21 14:15:33	11001325	2.94872e-11	4.18123e-11	5.63551e-09	-1.03092e-11	3.41626e-10	1.91077e-11	8.36246e-15	5.63269e-09	-1.03082e-11	0.00339229	1.48463e-06	602250
2022-03-21 14:16:04	11032031	2.20052e-11	4.22525e-11	5.6297e-09	2.48002e-11	3.34984e-10	1.42594e-11	8.4505e-15	5.62689e-09	2.47977e-11	0.00253415	1.50181e-06	450365
2022-03-21 14:16:34	11062738	2.98204e-11	4.33991e-11	5.57869e-09	-2.81649e-12	3.30231e-10	1.93236e-11	8.67982e-15	5.5759e-09	-2.81621e-12	0.00346556	1.55667e-06	621525
2022-03-21 14:17:05	11093445	2.83584e-11	4.15563e-11	5.59055e-09	-1.12874e-11	3.25647e-10	1.83762e-11	8.31126e-15	5.58775e-09	-1.12863e-11	0.00328866	1.48741e-06	588548
2022-03-21 14:17:36	11124152	1.59959e-11	5.01153e-11	5.56863e-09	7.47123e-12	3.30055e-10	1.03653e-11	1.00231e-14	5.56585e-09	7.47048e-12	0.00186231	1.80082e-06	334596
2022-03-21 14:18:06	11154860	2.76597e-11	2.46123e-11	5.58938e-09	-8.68598e-12	3.19589e-10	1.79235e-11	4.92246e-15	5.58659e-09	-8.68511e-12	0.00320831	8.81121e-07	574288
2022-03-21 14:18:37	11185566	1.37922e-11	3.26491e-11	5.55953e-09	-1.90489e-11	3.12064e-10	8.93735e-12	6.52982e-15	5.55675e-09	-1.9047e-11	0.00160838	1.17511e-06	289445
2022-03-21 14:19:08	11216273	2.92614e-11	2.88713e-11	5.54259e-09	8.66448e-12	3.00031e-10	1.89614e-11	5.77426e-15	5.53982e-09	8.66361e-12	0.00342275	1.04232e-06	617844
2022-03-21 14:19:38	11246980	2.56064e-11	3.71437e-11	5.52423e-09	-3.41419e-11	3.07634e-10	1.65929e-11	7.42874e-15	5.52147e-09	-3.41385e-11	0.00300517	1.34543e-06	544270
2022-03-21 14:20:09	11277687	1.38352e-11	4.63477e-11	5.50616e-09	-3.54964e-11	3.09461e-10	8.96521e-12	9.26954e-15	5.50341e-09	-3.54929e-11	0.00162903	1.68433e-06	296004
2022-03-21 14:20:37	11305145	1.55659e-11	3.41849e-11	6.02278e-09	-2.71114e-11	2.97728e-10	1.00867e-11	6.83698e-15	6.01977e-09	-2.71087e-11	0.0016756	1.13575e-06	278349
2022-03-21 14:21:07	11335851	1.50499e-11	4.19658e-11	5.09818e-09	1.50499e-13	3.00147e-10	9.75234e-12	8.39316e-15	5.09563e-09	1.50484e-13	0.00191386	1.64713e-06	375589
2022-03-21 14:21:38	11366558	2.69609e-11	4.06042e-11	5.46329e-09	1.41684e-11	3.09837e-10	1.74707e-11	8.12084e-15	5.46056e-09	1.4167e-11	0.00319943	1.48718e-06	585916
2022-03-21 14:22:09	11397265	3.96136e-11	3.9908e-11	1.56389e-08	-3.59049e-12	3.42256e-10	2.56696e-11	7.9816e-15	1.56311e-08	-3.59013e-12	0.00164222	5.10624e-07	105061
2022-03-21 14:22:40	11428992	1.66087e-11	2.07116e-11	2.28437e-07	2.24889e-11	3.07396e-10	1.07624e-11	4.14232e-15	2.28323e-07	2.24867e-11	4.71369e-05	1.81424e-08	206.449
2022-03-21 14:23:10	11458120	3.08632e-11	3.11851e-11	3.21066e-07	6.13824e-12	2.86103e-10	1.99994e-11	6.23702e-15	3.20905e-07	6.13763e-12	6.23216e-05	1.94357e-08	194.206
2022-03-21 14:23:38	11486226	3.01752e-11	3.79832e-11	3.64424e-07	3.16049e-12	2.78271e-10	1.95535e-11	7.59664e-15	3.64242e-07	3.16017e-12	5.36828e-05	2.0856e-08	147.382
2022-03-21 14:24:06	11514333	8.97623e-12	2.55951e-11	3.71322e-07	2.44024e-12	3.4198e-10	5.8166e-12	5.11902e-15	3.71136e-07	2.44e-12	1.56724e-05	1.37928e-08	42.2281
2022-03-21 14:24:34	11542440	3.49309e-09	3.24444e-11	3.5242e-07	8.37531e-11	1.64316e-09	2.26352e-09	6.48888e-15	3.52244e-07	8.37447e-11	0.00642601	1.84216e-08	18243.1
2022-03-21 14:25:07	11575878	9.27085e-09	3.73382e-11	3.35041e-07	1.04898e-10	1.53275e-09	6.00751e-09	7.46764e-15	3.34873e-07	1.04888e-10	0.0179396	2.22999e-08	53571.4
2022-03-21 14:25:30	11598905	1.09736e-08	4.32661e-11	3.3513e-07	1.29204e-10	1.22605e-09	7.11089e-09	8.65322e-15	3.34962e-07	1.29191e-10	0.0212289	2.58334e-08	63377
2022-03-21 14:25:47	11615031	1.14366e-08	3.65806e-11	3.31637e-07	1.05618e-10	9.6505e-10	7.41092e-09	7.31612e-15	3.31471e-07	1.05607e-10	0.0223577	2.20717e-08	67449.8
2022-03-21 14:26:06	11634406	1.1747e-08	2.66394e-11	3.29576e-07	1.37202e-10	8.004e-10	7.61206e-09	5.32788e-15	3.29411e-07	1.37188e-10	0.0231081	1.61739e-08	70149.6
2022-03-21 14:26:25	11653783	1.196e-08	2.86461e-11	3.30383e-07	1.0206e-10	6.67512e-10	7.75008e-09	5.72922e-15	3.30218e-07	1.0205e-10	0.0234696	1.73498e-08	71073.1
2022-03-21 14:26:45	11673159	9.7771e-09	3.69799e-11	3.18288e-07	8.14203e-11	5.28116e-10	6.33556e-09	7.39598e-15	3.18129e-07	8.14122e-11	0.0199151	2.32484e-08	62600.7
2022-03-21 14:27:07	11695125	4.0417e-09	3.01409e-11	3.08524e-07	2.75522e-11	4.3605e-10	2.61902e-09	6.02818e-15	3.0837e-07	2.75494e-11	0.00849312	1.95485e-08	27542
2022-03-21 14:27:28	11716601	2.01622e-09	3.79934e-11	3.22499e-07	1.42222e-11	4.00606e-10	1.30651e-09	7.59868e-15	3.22338e-07	1.42208e-11	0.00405323	2.35737e-08	12574.5
2022-03-21 14:27:50	11738078	1.11336e-09	2.48273e-11	3.43641e-07	1.19432e-11	3.63718e-10	7.21457e-10	4.96546e-15	3.43469e-07	1.1942e-11	0.0021005	1.44568e-08	6115.54
2022-03-21 14:28:19	11767095	5.17977e-10	3.44613e-11	3.55466e-07	9.44923e-12	3.81693e-10	3.35649e-10	6.89226e-15	3.55288e-07	9.44829e-12	0.000944723	1.93991e-08	2659.03
2022-03-21 14:28:47	11795202	1.829e-10	2.65064e-11	1.81585e-07	-4.80524e-12	6.35454e-10	1.18519e-10	5.30128e-15	1.81494e-07	-4.80476e-12	0.000653019	2.92091e-08	3598.02
2022-03-21 14:29:15	11823310	1.35901e-10	2.62094e-11	5.29145e-08	-1.19324e-11	6.54996e-10	8.80638e-11	5.24188e-15	5.2888e-08	-1.19312e-11	0.0016651	9.91128e-08	31483.5
2022-03-21 14:29:44	11852437	8.22373e-11	3.00794e-11	1.80969e-08	1.40072e-11	5.82986e-10	5.32898e-11	6.01588e-15	1.80879e-08	1.40058e-11	0.00294616	3.32592e-07	162881
2022-03-21 14:30:09	11877794	6.63166e-11	3.42566e-11	1.35365e-08	1.54799e-12	5.94789e-10	4.29732e-11	6.85132e-15	1.35297e-08	1.54784e-12	0.0031762	5.0639e-07	234757
2022-03-21 14:30:38	11906400	6.35431e-11	2.39775e-11	2.24943e-07	1.18679e-11	5.26971e-10	4.11759e-11	4.7955e-15	2.24831e-07	1.18667e-11	0.000183142	2.13294e-08	814.578
2022-03-21 14:31:07	11935527	3.93126e-11	1.91861e-11	3.16318e-07	6.22424e-12	4.72484e-10	2.54746e-11	3.83722e-15	3.1616e-07	6.22362e-12	8.0575e-05	1.2137e-08	254.855
2022-03-21 14:31:32	11960383	3.31529e-11	2.22269e-11	3.43641e-07	-7.63248e-12	4.21614e-10	2.14831e-11	4.44538e-15	3.43469e-07	-7.63172e-12	6.25473e-05	1.29426e-08	182.105
2022-03-21 14:32:00	11988490	2.37144e-11	2.48375e-11	3.75532e-07	-3.12824e-12	3.89694e-10	1.53669e-11	4.9675e-15	3.75344e-07	-3.12793e-12	4.09409e-05	1.32345e-08	109.076
2022-03-21 14:32:28	12016597	1.36789e-09	3.17994e-11	3.57167e-07	6.76926e-11	6.64986e-10	8.86393e-10	6.35988e-15	3.56988e-07	6.76858e-11	0.00248297	1.78154e-08	6955.33
2022-03-21 14:33:02	12050035	9.1993e-09	2.71002e-11	3.38087e-07	1.15003e-10	6.8634e-10	5.96115e-09	5.42004e-15	3.37918e-07	1.14991e-10	0.0176408	1.60395e-08	52204.4
2022-03-21 14:33:25	12073063	1.12087e-08	3.10111e-11	3.39341e-07	9.9878e-11	6.14884e-10	7.26324e-09	6.20222e-15	3.39171e-07	9.9868e-11	0.0214147	1.82864e-08	63138.2
2022-03-21 14:33:44	12092439	1.18994e-08	3.66625e-11	3.34592e-07	1.12337e-10	5.59705e-10	7.71081e-09	7.3325e-15	3.34425e-07	1.12326e-10	0.0230569	2.19257e-08	68945.1
2022-03-21 14:34:03	12111815	1.21125e-08	3.76147e-11	3.31905e-07	1.08005e-10	5.11215e-10	7.8489e-09	7.52294e-15	3.31739e-07	1.07994e-10	0.0236599	2.26773e-08	71320.7
2022-03-21 14:34:23	12131191	1.22186e-08	3.95701e-11	3.31188e-07	9.93836e-11	4.76861e-10	7.91765e-09	7.91402e-15	3.31022e-07	9.93737e-11	0.0239188	2.39078e-08	72257.3
2022-03-21 14:34:42	12150566	1.04093e-08	3.71642e-11	3.39162e-07	7.32503e-11	4.0552e-10	6.74523e-09	7.43284e-15	3.38992e-07	7.3243e-11	0.0198979	2.19263e-08	58697.1
2022-03-21 14:35:04	12172534	4.49227e-09	3.22806e-11	3.0942e-07	1.28784e-11	3.66835e-10	2.91099e-09	6.45612e-15	3.09265e-07	1.28771e-11	0.0094126	2.08757e-08	30435.4
2022-03-21 14:35:26	12194010	2.24639e-09	1.29921e-11	3.20259e-07	-1.51682e-11	3.35952e-10	1.45566e-09	2.59842e-15	3.20099e-07	-1.51667e-11	0.00454753	8.11755e-09	14206.7
2022-03-21 14:35:47	12215486	1.24385e-09	2.24213e-11	3.42924e-07	6.62199e-12	3.1846e-10	8.06015e-10	4.48426e-15	3.42753e-07	6.62133e-12	0.00235159	1.30831e-08	6860.91
2022-03-21 14:36:16	12244504	5.92979e-10	4.36961e-11	3.5878e-07	-6.04149e-12	3.09584e-10	3.8425e-10	8.73922e-15	3.58601e-07	-6.04089e-12	0.00107153	2.43703e-08	2988.08
2022-03-21 14:36:44	12272610	2.96e-10	2.83492e-11	1.72627e-07	-2.97559e-11	6.07274e-10	1.91808e-10	5.66984e-15	1.72541e-07	-2.97529e-11	0.00111167	3.28609e-08	6442.93
2022-03-21 14:37:12	12300717	1.46092e-10	2.78066e-11	5.49883e-08	-1.07929e-11	6.50466e-10	9.46676e-11	5.56132e-15	5.49608e-08	-1.07918e-11	0.00172246	1.01187e-07	31339.7
2022-03-21 14:37:41	12329845	8.66448e-11	3.03866e-11	2.09758e-08	3.13899e-12	6.09478e-10	5.61458e-11	6.07732e-15	2.09653e-08	3.13868e-12	0.00267803	2.89875e-07	127736
2022-03-21 14:38:10	12358451	6.23714e-11	3.22499e-11	1.08485e-08	-1.00404e-11	5.76905e-10	4.04167e-11	6.44998e-15	1.08431e-08	-1.00394e-11	0.00372742	5.94848e-07	343760
2022-03-21 14:38:39	12387058	5.02991e-11	4.19761e-11	7.73721e-09	-1.97799e-11	5.33306e-10	3.25938e-11	8.39522e-15	7.73334e-09	-1.97779e-11	0.00421471	1.08559e-06	545005
2022-03-21 14:39:07	12415665	4.44511e-11	4.29896e-11	6.65419e-09	1.43082e-11	4.97716e-10	2.88043e-11	8.59792e-15	6.65086e-09	1.43068e-11	0.00433091	1.29275e-06	651181
2022-03-21 14:39:39	12447392	3.36474e-11	3.1697e-11	6.26034e-09	-2.13817e-11	4.66311e-10	2.18035e-11	6.3394e-15	6.25721e-09	-2.13796e-11	0.00348454	1.01314e-06	556884
2022-03-21 14:40:10	12478100	5.35779e-11	3.95599e-11	6.0892e-09	-1.40609e-11	4.51039e-10	3.47185e-11	7.91198e-15	6.08616e-09	-1.40595e-11	0.0057045	1.3e-06	937291
2022-03-21 14:40:40	12508806	4.68269e-11	2.95164e-11	5.98306e-09	-1.60927e-11	4.30406e-10	3.03438e-11	5.90328e-15	5.98007e-09	-1.60911e-11	0.00507416	9.87159e-07	848512
2022-03-21 14:41:11	12539513	3.05944e-11	5.10266e-11	5.92488e-09	-1.11154e-11	4.11455e-10	1.98252e-11	1.02053e-14	5.92192e-09	-1.11143e-11	0.00334776	1.72331e-06	565317
2022-03-21 14:41:42	12570220	3.84634e-11	4.53853e-11	5.8787e-09	-7.25623e-12	3.94509e-10	2.49243e-11	9.07706e-15	5.87576e-09	-7.2555e-12	0.00424188	1.54483e-06	721929
2022-03-21 14:42:11	12599887	1.20937e-11	3.20349e-11	5.84802e-09	2.88744e-11	3.74106e-10	7.83672e-12	6.40698e-15	5.8451e-09	2.88715e-11	0.00134073	1.09613e-06	229378
2022-03-21 14:42:42	12630595	4.69451e-11	5.16306e-11	5.81827e-09	1.73612e-11	3.77669e-10	3.04204e-11	1.03261e-14	5.81536e-09	1.73595e-11	0.00523105	1.77566e-06	899522
2022-03-21 14:43:13	12661301	3.60769e-11	2.31073e-11	5.76305e-09	1.95327e-11	3.53904e-10	2.33778e-11	4.62146e-15	5.76017e-09	1.95307e-11	0.00405853	8.02313e-07	704586
2022-03-21 14:43:44	12692008	3.79581e-11	3.17585e-11	5.74998e-09	1.26957e-11	3.50157e-10	2.45968e-11	6.3517e-15	5.74711e-09	1.26944e-11	0.00427987	1.1052e-06	744700
2022-03-21 14:44:11	12719465	1.33514e-11	3.57309e-11	5.72561e-09	9.56748e-13	3.58312e-10	8.65171e-12	7.14618e-15	5.72275e-09	9.56652e-13	0.00151181	1.24873e-06	264176
2022-03-21 14:44:42	12750172	2.77349e-11	5.03918e-11	5.68736e-09	1.16744e-11	3.60976e-10	1.79722e-11	1.00784e-14	5.68452e-09	1.16732e-11	0.00316161	1.77295e-06	556179
2022-03-21 14:45:12	12780880	4.35696e-11	3.1523e-11	5.69478e-09	-1.26312e-11	3.39308e-10	2.82331e-11	6.3046e-15	5.69193e-09	-1.26299e-11	0.0049602	1.10764e-06	871443
2022-03-21 14:45:43	12811586	2.40584e-11	2.37216e-11	5.67477e-09	6.83698e-12	3.36574e-10	1.55898e-11	4.74432e-15	5.67193e-09	6.8363e-12	0.00274859	8.36456e-07	484596
2022-03-21 14:46:14	12842293	2.87347e-11	2.86461e-11	5.65202e-09	-3.95599e-12	3.19658e-10	1.86201e-11	5.72922e-15	5.64919e-09	-3.95559e-12	0.00329606	1.01417e-06	583457
2022-03-21 14:46:45	12873000	3.22069e-11	4.86001e-11	5.64081e-09	5.85874e-12	3.2597e-10	2.08701e-11	9.72002e-15	5.63799e-09	5.85815e-12	0.00370169	1.72402e-06	656561
2022-03-21 14:47:15	12903707	2.85949e-11	3.63758e-11	5.60945e-09	-2.00917e-11	3.20833e-10	1.85295e-11	7.27516e-15	5.60665e-09	-2.00897e-11	0.00330492	1.2976e-06	589464
2022-03-21 14:47:46	12934415	2.48539e-11	3.04685e-11	5.62463e-09	-1.25882e-11	3.17116e-10	1.61053e-11	6.0937e-15	5.62182e-09	-1.25869e-11	0.00286479	1.08394e-06	509584
2022-03-21 14:48:17	12965121	4.96111e-11	4.2918e-11	5.597e-09	6.26724e-12	3.21416e-10	3.2148e-11	8.5836e-15	5.5942e-09	6.26661e-12	0.00574666	1.53437e-06	1.02725e+06
2022-03-21 14:48:47	12995828	3.07664e-11	2.94345e-11	5.59568e-09	-2.57999e-12	3.1297e-10	1.99366e-11	5.8869e-15	5.59288e-09	-2.57973e-12	0.00356464	1.05257e-06	637353
2022-03-21 14:49:18	13026535	3.50771e-11	3.94575e-11	5.58623e-09	6.18124e-12	3.14129e-10	2.273e-11	7.8915e-15	5.58344e-09	6.18062e-12	0.00407096	1.41338e-06	729114
2022-03-21 14:49:49	13057242	2.38864e-11	3.77887e-11	5.31331e-09	-2.54559e-11	3.09108e-10	1.54784e-11	7.55774e-15	5.31065e-09	-2.54534e-11	0.00291459	1.42313e-06	548820
2022-03-21 14:50:19	13087950	3.33679e-11	3.8321e-11	5.34341e-09	4.07209e-11	3.06751e-10	2.16224e-11	7.6642e-15	5.34074e-09	4.07168e-11	0.00404858	1.43505e-06	758056
2022-03-21 14:50:50	13118656	3.10459e-11	4.23242e-11	5.59134e-09	2.59289e-11	3.11872e-10	2.01177e-11	8.46484e-15	5.58854e-09	2.59263e-11	0.00359982	1.51468e-06	644142
2022-03-21 14:51:21	13149363	3.36689e-11	3.73075e-11	9.3435e-08	2.66599e-12	3.39376e-10	2.18174e-11	7.4615e-15	9.33883e-08	2.66572e-12	0.000233621	7.98976e-08	2501.61
2022-03-21 14:51:53	13181611	2.10484e-11	2.53597e-11	2.79947e-07	-5.52549e-12	3.00277e-10	1.36394e-11	5.07194e-15	2.79807e-07	-5.52494e-12	4.87456e-05	1.81266e-08	174.212
2022-03-21 14:52:21	13209718	3.33679e-11	3.04377e-11	3.45163e-07	1.72967e-11	2.9405e-10	2.16224e-11	6.08754e-15	3.4499e-07	1.7295e-11	6.26754e-05	1.76455e-08	181.673
2022-03-21 14:52:49	13237825	2.00702e-11	2.54518e-11	3.5672e-07	1.97799e-12	2.58974e-10	1.30055e-11	5.09036e-15	3.56542e-07	1.97779e-12	3.64768e-05	1.4277e-08	102.307
2022-03-21 14:53:17	13265932	1.80492e-11	2.17047e-11	3.6962e-07	1.83932e-11	9.90057e-10	1.16959e-11	4.34094e-15	3.69435e-07	1.83914e-11	3.16588e-05	1.17502e-08	85.6952
2022-03-21 14:53:51	13299370	6.7318e-09	4.19453e-11	3.32174e-07	1.10821e-10	1.72691e-09	4.36221e-09	8.38906e-15	3.32008e-07	1.1081e-10	0.0131389	2.52677e-08	39573.9
2022-03-21 14:54:12	13320846	9.64953e-09	3.65601e-11	3.37191e-07	1.50521e-10	1.4412e-09	6.2529e-09	7.31202e-15	3.37022e-07	1.50506e-10	0.0185534	2.16959e-08	55050.8
2022-03-21 14:54:35	13343874	1.11396e-08	4.30409e-11	3.33428e-07	1.2285e-10	1.09613e-09	7.21846e-09	8.60818e-15	3.33261e-07	1.22838e-10	0.0216601	2.58301e-08	64994.2
2022-03-21 14:54:55	13363250	1.16019e-08	3.14513e-11	3.31099e-07	1.48253e-10	8.7975e-10	7.51803e-09	6.29026e-15	3.30933e-07	1.48238e-10	0.0227177	1.90076e-08	68647.2
2022-03-21 14:55:14	13382626	1.18773e-08	3.44818e-11	3.29576e-07	9.8502e-11	7.42243e-10	7.69649e-09	6.89636e-15	3.29411e-07	9.84921e-11	0.0233644	2.09354e-08	70927.7
2022-03-21 14:55:34	13402001	1.16583e-08	4.1761e-11	3.36563e-07	8.61718e-11	6.30632e-10	7.55458e-09	8.3522e-15	3.36395e-07	8.61632e-11	0.0224575	2.48286e-08	66759.3
2022-03-21 14:55:55	13423968	5.93375e-09	3.7502e-11	3.08613e-07	1.55122e-11	4.65827e-10	3.84507e-09	7.5004e-15	3.08459e-07	1.55106e-11	0.0124654	2.43157e-08	40412
2022-03-21 14:56:17	13445445	2.82256e-09	3.62325e-11	3.11122e-07	-1.12874e-11	4.20509e-10	1.82902e-09	7.2465e-15	3.10966e-07	-1.12863e-11	0.00588172	2.33032e-08	18914.3
2022-03-21 14:56:38	13466921	1.46517e-09	4.1372e-11	3.34145e-07	5.63299e-12	3.87375e-10	9.4943e-10	8.2744e-15	3.33978e-07	5.63243e-12	0.00284279	2.47753e-08	8511.92
2022-03-21 14:57:07	13495939	6.59145e-10	2.79602e-11	3.55734e-07	8.39573e-12	3.50089e-10	4.27126e-10	5.59204e-15	3.55556e-07	8.39489e-12	0.00120129	1.57276e-08	3378.62
2022-03-21 14:57:36	13524045	3.46891e-10	1.85207e-11	2.3641e-07	1.11369e-11	5.48095e-10	2.24785e-10	3.70414e-15	2.36292e-07	1.11358e-11	0.000951304	1.56761e-08	4025.97
2022-03-21 14:58:04	13552152	1.82824e-10	3.17277e-11	7.80269e-08	3.07019e-11	6.27376e-10	1.1847e-10	6.34554e-15	7.79879e-08	3.06988e-11	0.00151908	8.13657e-08	19478.4
2022-03-21 14:58:32	13580260	9.40731e-11	4.9071e-11	2.72215e-08	2.31124e-11	6.14376e-10	6.09594e-11	9.8142e-15	2.72079e-08	2.31101e-11	0.0022405	3.60712e-07	82347.6
2022-03-21 14:59:01	13609387	6.80581e-11	3.31509e-11	1.26233e-08	7.87973e-12	5.52241e-10	4.41016e-11	6.63018e-15	1.2617e-08	7.87894e-12	0.00349542	5.25496e-07	277041
2022-03-21 14:59:29	13637995	5.59751e-11	4.23549e-11	8.22713e-09	2.10484e-11	5.23639e-10	3.62719e-11	8.47098e-15	8.22302e-09	2.10463e-11	0.00441102	1.03015e-06	536423
2022-03-21 14:59:58	13666601	4.33331e-11	3.35091e-11	6.76728e-09	1.46092e-11	4.85868e-10	2.80798e-11	6.70182e-15	6.7639e-09	1.46077e-11	0.00415143	9.90822e-07	613763
2022-03-21 15:00:30	13698330	5.48464e-11	3.96623e-11	6.28479e-09	-1.28569e-11	4.54049e-10	3.55405e-11	7.93246e-15	6.28165e-09	-1.28556e-11	0.00565783	1.2628e-06	900691
2022-03-21 15:00:57	13725786	4.13121e-11	3.98875e-11	6.08255e-09	1.55444e-11	4.27856e-10	2.67702e-11	7.9775e-15	6.07951e-09	1.55428e-11	0.00440336	1.31219e-06	724295
2022-03-21 15:01:28	13756493	2.99817e-11	3.10009e-11	5.98462e-09	9.25573e-12	4.07839e-10	1.94281e-11	6.20018e-15	5.98163e-09	9.2548e-12	0.00324797	1.03654e-06	542991
2022-03-21 15:01:59	13787200	3.72594e-11	3.31406e-11	5.88066e-09	-1.65334e-11	3.95307e-10	2.41441e-11	6.62812e-15	5.87772e-09	-1.65317e-11	0.00410773	1.12767e-06	698865
2022-03-21 15:02:29	13817907	3.49266e-11	4.73409e-11	5.82481e-09	2.94764e-11	3.92113e-10	2.26324e-11	9.46818e-15	5.8219e-09	2.94735e-11	0.00388747	1.6263e-06	667732
2022-03-21 15:03:00	13848615	2.77887e-11	3.82494e-11	5.79431e-09	1.11047e-11	3.75942e-10	1.80071e-11	7.64988e-15	5.79141e-09	1.11036e-11	0.00310927	1.3209e-06	536876
2022-03-21 15:03:31	13879321	3.70659e-11	2.82673e-11	5.75216e-09	-4.48274e-12	3.57966e-10	2.40187e-11	5.65346e-15	5.74928e-09	-4.48229e-12	0.00417769	9.83333e-07	726645
2022-03-21 15:04:02	13910028	2.76704e-11	3.23113e-11	5.71598e-09	-4.25699e-12	3.54926e-10	1.79304e-11	6.46226e-15	5.71312e-09	-4.25656e-12	0.00313846	1.13113e-06	549343
2022-03-21 15:04:32	13940735	2.15537e-11	4.71258e-11	5.7046e-09	1.00727e-11	3.43461e-10	1.39668e-11	9.42516e-15	5.70175e-09	1.00717e-11	0.00244956	1.65303e-06	429616
2022-03-21 15:05:03	13971442	2.95194e-11	3.39187e-11	5.68277e-09	-7.66473e-12	3.41059e-10	1.91286e-11	6.78374e-15	5.67993e-09	-7.66396e-12	0.00336775	1.19434e-06	592921
2022-03-21 15:05:34	14002150	1.88339e-11	2.90659e-11	5.64234e-09	1.23624e-11	3.27606e-10	1.22044e-11	5.81318e-15	5.63952e-09	1.23612e-11	0.00216408	1.03079e-06	383735
2022-03-21 15:06:04	14032856	2.37252e-11	3.36525e-11	5.64952e-09	3.57974e-12	3.35514e-10	1.53739e-11	6.7305e-15	5.6467e-09	3.57938e-12	0.00272264	1.19194e-06	482166
2022-03-21 15:06:35	14063563	3.77754e-11	3.61096e-11	5.61784e-09	5.04174e-12	3.22668e-10	2.44785e-11	7.22192e-15	5.61503e-09	5.04124e-12	0.00435945	1.28618e-06	776390
2022-03-21 15:07:06	14094270	1.00404e-11	4.41875e-11	5.62783e-09	1.78127e-11	3.20088e-10	6.50618e-12	8.8375e-15	5.62502e-09	1.78109e-11	0.00115665	1.57111e-06	205626
2022-03-21 15:07:36	14124977	3.53351e-11	4.53239e-11	5.59815e-09	-3.76249e-12	3.25939e-10	2.28971e-11	9.06478e-15	5.59535e-09	-3.76211e-12	0.00409217	1.62006e-06	731352
2022-03-21 15:08:07	14155685	1.61787e-11	3.47991e-11	5.60909e-09	2.37682e-11	3.19658e-10	1.04838e-11	6.95982e-15	5.60629e-09	2.37658e-11	0.00187001	1.24143e-06	333556
2022-03-21 15:08:38	14186391	3.57436e-11	3.36115e-11	5.58332e-09	1.15239e-11	3.04101e-10	2.31619e-11	6.7223e-15	5.58053e-09	1.15227e-11	0.00415048	1.2046e-06	743743
2022-03-21 15:09:09	14217098	2.42197e-11	3.93347e-11	5.57518e-09	-2.39724e-12	3.07096e-10	1.56944e-11	7.86694e-15	5.57239e-09	-2.397e-12	0.00281645	1.41177e-06	505429
2022-03-21 15:09:39	14247805	2.09624e-11	4.18839e-11	5.58141e-09	8.68598e-12	3.0308e-10	1.35836e-11	8.37678e-15	5.57862e-09	8.68511e-12	0.00243495	1.50159e-06	436478
2022-03-21 15:10:10	14278512	3.16694e-11	4.34606e-11	5.59206e-09	2.05217e-11	3.06628e-10	2.05218e-11	8.69212e-15	5.58926e-09	2.05196e-11	0.00367164	1.55515e-06	656910
2022-03-21 15:10:41	14309220	2.97237e-11	2.97518e-11	5.49098e-09	-2.87024e-11	2.97551e-10	1.9261e-11	5.95036e-15	5.48823e-09	-2.86995e-11	0.0035095	1.0842e-06	639459
2022-03-21 15:11:11	14339926	1.94359e-11	3.1267e-11	5.16628e-09	-1.98014e-11	3.006e-10	1.25945e-11	6.2534e-15	5.1637e-09	-1.97994e-11	0.00243904	1.21103e-06	472344
2022-03-21 15:11:42	14370633	3.43891e-11	3.15947e-11	5.51822e-09	-5.07399e-12	3.04232e-10	2.22841e-11	6.31894e-15	5.51546e-09	-5.07348e-12	0.0040403	1.14568e-06	732541
2022-03-21 15:12:13	14401340	4.28064e-11	4.06963e-11	3.34778e-08	-2.48647e-11	3.38909e-10	2.77385e-11	8.13926e-15	3.34611e-08	-2.48622e-11	0.00082898	2.43246e-07	24774.5
2022-03-21 15:12:45	14433067	1.92747e-11	2.25442e-11	2.48772e-07	6.09524e-12	2.97244e-10	1.249e-11	4.50884e-15	2.48648e-07	6.09463e-12	5.02318e-05	1.81335e-08	202.02
2022-03-21 15:13:14	14462195	2.69609e-11	2.2749e-11	3.16945e-07	-1.55552e-11	2.70684e-10	1.74707e-11	4.5498e-15	3.16787e-07	-1.55536e-11	5.51496e-05	1.43624e-08	174.091
2022-03-21 15:13:42	14490301	1.08144e-11	2.66599e-11	3.64783e-07	-3.92374e-12	2.70339e-10	7.00773e-12	5.33198e-15	3.64601e-07	-3.92335e-12	1.92203e-05	1.46242e-08	52.716
2022-03-21 15:14:10	14518408	1.88124e-11	6.93117e-12	3.62005e-07	1.74687e-11	5.03651e-10	1.21904e-11	1.38623e-15	3.61824e-07	1.7467e-11	3.36916e-05	3.83124e-09	93.116
2022-03-21 15:14:38	14546515	4.32204e-09	3.2209e-11	3.26978e-07	8.29253e-11	1.67784e-09	2.80068e-09	6.4418e-15	3.26815e-07	8.2917e-11	0.00856964	1.97109e-08	26221.7
2022-03-21 15:15:11	14579953	9.57258e-09	2.77964e-11	3.36384e-07	1.45984e-10	1.43847e-09	6.20303e-09	5.55928e-15	3.36216e-07	1.45969e-10	0.0184496	1.65349e-08	54874.1
2022-03-21 15:15:34	14602980	1.09999e-08	3.4359e-11	3.35041e-07	1.21345e-10	1.14698e-09	7.12794e-09	6.8718e-15	3.34873e-07	1.21333e-10	0.0212855	2.05206e-08	63562.7
2022-03-21 15:15:51	14619106	1.14688e-08	5.01461e-11	3.31099e-07	1.09628e-10	9.30879e-10	7.43178e-09	1.00292e-14	3.30933e-07	1.09617e-10	0.022457	3.03059e-08	67859.7
2022-03-21 15:16:10	14638481	1.17343e-08	3.30894e-11	3.29934e-07	9.72228e-11	7.62021e-10	7.60383e-09	6.61788e-15	3.29769e-07	9.72131e-11	0.023058	2.00682e-08	69921.8
2022-03-21 15:16:29	14657858	1.18626e-08	4.23242e-11	3.33608e-07	9.55458e-11	6.73663e-10	7.68696e-09	8.46484e-15	3.33441e-07	9.55362e-11	0.0230534	2.53863e-08	69137.9
2022-03-21 15:16:49	14677234	9.1764e-09	2.43359e-11	3.16497e-07	4.58701e-11	5.16621e-10	5.94631e-09	4.86718e-15	3.16339e-07	4.58655e-11	0.0187973	1.5386e-08	59421.4
2022-03-21 15:17:07	14695950	3.90621e-09	3.40518e-11	3.07897e-07	4.45801e-11	4.32241e-10	2.53122e-09	6.81036e-15	3.07743e-07	4.45756e-11	0.00822512	2.213e-08	26727.2
2022-03-21 15:17:29	14717426	1.9835e-09	3.58639e-11	3.23126e-07	3.30669e-11	3.97219e-10	1.28531e-09	7.17278e-15	3.22964e-07	3.30636e-11	0.00397972	2.22092e-08	12322.5
2022-03-21 15:17:50	14738903	1.08506e-09	3.47275e-11	3.45701e-07	6.68004e-11	3.57452e-10	7.03119e-10	6.9455e-15	3.45528e-07	6.67937e-11	0.00203491	2.01011e-08	5889.28
2022-03-21 15:18:19	14767920	5.07259e-10	2.11723e-11	3.55555e-07	5.45024e-12	3.7608e-10	3.28704e-10	4.23446e-15	3.55377e-07	5.44969e-12	0.000924943	1.19154e-08	2602.71
2022-03-21 15:18:44	14792776	2.60783e-10	3.65396e-11	1.70924e-07	4.64399e-12	5.99449e-10	1.68987e-10	7.30792e-15	1.70839e-07	4.64353e-12	0.000989164	4.27768e-08	5790.05
2022-03-21 15:19:12	14820883	1.26774e-10	4.69415e-11	5.43238e-08	3.01322e-11	6.27391e-10	8.21496e-11	9.3883e-15	5.42966e-08	3.01292e-11	0.00151298	1.72908e-07	27865
2022-03-21 15:19:42	14850010	7.66151e-11	4.68391e-11	2.06298e-08	1.58024e-12	5.87133e-10	4.96466e-11	9.36782e-15	2.06195e-08	1.58008e-12	0.00240775	4.54319e-07	116771
2022-03-21 15:20:10	14878617	4.14304e-11	4.96342e-11	1.06665e-08	1.07499e-12	5.40839e-10	2.68469e-11	9.92684e-15	1.06612e-08	1.07488e-12	0.0025182	9.31121e-07	236203
2022-03-21 15:20:39	14907225	5.70931e-11	3.64577e-11	7.64368e-09	6.76173e-12	5.06331e-10	3.69963e-11	7.29154e-15	7.63986e-09	6.76105e-12	0.00484254	9.54408e-07	633852
2022-03-21 15:21:07	14935831	4.29031e-11	4.21604e-11	6.54895e-09	-1.76192e-11	4.82551e-10	2.78012e-11	8.43208e-15	6.54568e-09	-1.76174e-11	0.00424726	1.28819e-06	648866
2022-03-21 15:21:39	14967560	3.25832e-11	3.90685e-11	6.17709e-09	-7.09498e-12	4.32334e-10	2.11139e-11	7.8137e-15	6.174e-09	-7.09427e-12	0.00341981	1.26558e-06	553905
2022-03-21 15:22:07	14995016	2.68319e-11	2.95061e-11	6.0437e-09	-2.31124e-11	4.22819e-10	1.73871e-11	5.90122e-15	6.04068e-09	-2.31101e-11	0.00287833	9.76913e-07	476491
2022-03-21 15:22:37	15025723	3.73346e-11	3.20349e-11	5.93024e-09	-4.18174e-12	4.10764e-10	2.41928e-11	6.40698e-15	5.92727e-09	-4.18132e-12	0.00408161	1.08093e-06	688615
2022-03-21 15:23:08	15056430	3.44106e-11	1.99437e-11	5.85686e-09	2.96484e-11	3.85655e-10	2.22981e-11	3.98874e-15	5.85393e-09	2.96454e-11	0.00380908	6.81378e-07	650687
2022-03-21 15:23:39	15087137	1.79524e-11	2.92194e-11	5.81935e-09	1.13197e-11	3.66175e-10	1.16332e-11	5.84388e-15	5.81644e-09	1.13186e-11	0.00200005	1.00472e-06	343861
2022-03-21 15:24:09	15117845	2.28437e-11	3.84951e-11	5.77548e-09	9.18048e-12	3.62144e-10	1.48027e-11	7.69902e-15	5.77259e-09	9.17956e-12	0.00256431	1.33372e-06	444222
2022-03-21 15:24:40	15148551	2.76167e-11	4.08499e-11	5.75077e-09	9.06223e-12	3.56208e-10	1.78956e-11	8.16998e-15	5.74789e-09	9.06132e-12	0.00311342	1.42139e-06	541663
2022-03-21 15:25:11	15179258	3.44859e-11	4.08191e-11	5.7247e-09	2.73157e-11	3.54043e-10	2.23469e-11	8.16382e-15	5.72184e-09	2.7313e-11	0.00390554	1.42678e-06	682567
2022-03-21 15:25:38	15206715	3.55931e-11	3.96623e-11	5.6949e-09	-1.52327e-11	3.44145e-10	2.30643e-11	7.93246e-15	5.69205e-09	-1.52312e-11	0.00405202	1.3936e-06	711874
2022-03-21 15:26:09	15237422	3.22392e-11	4.4679e-11	5.67223e-09	2.10914e-11	3.38655e-10	2.0891e-11	8.9358e-15	5.66939e-09	2.10893e-11	0.00368487	1.57615e-06	649959
2022-03-21 15:26:40	15268130	1.82749e-11	2.23599e-11	5.66766e-09	2.08764e-11	3.27836e-10	1.18421e-11	4.47198e-15	5.66483e-09	2.08743e-11	0.00209047	7.89429e-07	369026
2022-03-21 15:27:10	15298836	2.50797e-11	3.33556e-11	5.6155e-09	1.56197e-11	3.1846e-10	1.62516e-11	6.67112e-15	5.61269e-09	1.56181e-11	0.00289552	1.18858e-06	515887
2022-03-21 15:27:41	15329543	2.91539e-11	3.45432e-11	5.63028e-09	-7.64323e-12	3.14184e-10	1.88917e-11	6.90864e-15	5.62746e-09	-7.64247e-12	0.00335706	1.22766e-06	596549
2022-03-21 15:28:12	15360250	2.37144e-11	4.3348e-11	5.61032e-09	1.63077e-11	3.14498e-10	1.53669e-11	8.6696e-15	5.60751e-09	1.63061e-11	0.00274042	1.54607e-06	488704
2022-03-21 15:28:39	15387706	2.44347e-11	3.33863e-11	5.58736e-09	-1.08789e-11	3.15535e-10	1.58337e-11	6.67726e-15	5.58457e-09	-1.08778e-11	0.00283526	1.19566e-06	507695
2022-03-21 15:29:10	15418415	1.20829e-11	3.73177e-11	5.5922e-09	-2.80574e-12	3.16579e-10	7.82972e-12	7.46354e-15	5.5894e-09	-2.80546e-12	0.00140081	1.3353e-06	250620
2022-03-21 15:29:41	15449121	1.02662e-11	3.46763e-11	5.5668e-09	-1.23839e-11	3.134e-10	6.6525e-12	6.93526e-15	5.56402e-09	-1.23827e-11	0.00119563	1.24645e-06	214886
2022-03-21 15:30:11	15479828	4.87726e-11	3.50551e-11	5.56464e-09	2.11774e-12	3.14506e-10	3.16046e-11	7.01102e-15	5.56186e-09	2.11753e-12	0.00568239	1.26055e-06	1.02167e+06
2022-03-21 15:30:42	15510535	3.68079e-11	3.05709e-11	5.56748e-09	7.93348e-12	2.98588e-10	2.38515e-11	6.11418e-15	5.5647e-09	7.93269e-12	0.00428622	1.09874e-06	770253
2022-03-21 15:31:13	15541242	1.70387e-11	4.04813e-11	5.55438e-09	2.43702e-11	3.10336e-10	1.10411e-11	8.09626e-15	5.5516e-09	2.43678e-11	0.00198881	1.45836e-06	358241
2022-03-21 15:31:43	15571950	2.84229e-11	2.80523e-11	5.35783e-09	-9.01923e-12	2.97613e-10	1.8418e-11	5.61046e-15	5.35515e-09	-9.01833e-12	0.00343931	1.04768e-06	642244
2022-03-21 15:32:14	15602656	3.63564e-11	3.89558e-11	5.19986e-09	1.17819e-11	3.0556e-10	2.35589e-11	7.79116e-15	5.19726e-09	1.17807e-11	0.00453296	1.49909e-06	872182
2022-03-21 15:32:45	15633363	2.11989e-11	5.11801e-11	5.51923e-09	1.35987e-11	2.91101e-10	1.37369e-11	1.0236e-14	5.51647e-09	1.35973e-11	0.00249016	1.85554e-06	451404
2022-03-21 15:33:16	15664070	3.31206e-11	4.33377e-11	5.22096e-08	-1.69634e-11	3.31107e-10	2.14621e-11	8.66754e-15	5.21835e-08	-1.69617e-11	0.000411282	1.66097e-07	7881.46
2022-03-21 15:33:47	15695797	3.10137e-11	1.49169e-11	2.62657e-07	5.43949e-12	2.84283e-10	2.00969e-11	2.98338e-15	2.62526e-07	5.43895e-12	7.6552e-05	1.13641e-08	291.598
2022-03-21 15:34:16	15724925	1.61572e-11	2.3394e-11	3.24649e-07	-2.17149e-11	2.71798e-10	1.04699e-11	4.6788e-15	3.24487e-07	-2.17127e-11	3.22659e-05	1.44191e-08	99.4369
2022-03-21 15:34:45	15753031	5.03099e-12	3.5219e-11	3.65141e-07	-2.10269e-11	2.61854e-10	3.26008e-12	7.0438e-15	3.64958e-07	-2.10248e-11	8.93275e-06	1.93003e-08	24.4761
2022-03-21 15:35:13	15781138	1.17174e-11	2.92604e-11	3.75891e-07	4.66549e-12	6.74269e-10	7.59288e-12	5.85208e-15	3.75703e-07	4.66502e-12	2.02098e-05	1.55763e-08	53.7919
2022-03-21 15:35:46	15814576	6.39045e-09	3.76966e-11	3.3083e-07	8.59998e-11	1.72489e-09	4.14101e-09	7.53932e-15	3.30665e-07	8.59912e-11	0.0125233	2.28005e-08	37873.1
2022-03-21 15:36:08	15836051	9.14864e-09	5.35758e-11	3.35937e-07	1.38255e-10	1.50973e-09	5.92832e-09	1.07152e-14	3.35769e-07	1.38241e-10	0.0176559	3.19123e-08	52583.6
2022-03-21 15:36:31	15859080	1.09052e-08	4.55287e-11	3.34862e-07	1.24764e-10	1.16474e-09	7.06657e-09	9.10574e-15	3.34695e-07	1.24752e-10	0.0211135	2.72061e-08	63082.9
2022-03-21 15:36:50	15878456	1.14198e-08	3.70413e-11	3.30562e-07	1.03769e-10	9.24971e-10	7.40003e-09	7.40826e-15	3.30397e-07	1.03759e-10	0.0223974	2.24223e-08	67789.4
2022-03-21 15:37:09	15897831	1.17296e-08	4.99004e-11	3.2868e-07	9.82225e-11	7.82379e-10	7.60078e-09	9.98008e-15	3.28516e-07	9.82127e-11	0.0231367	3.03793e-08	70428.1
2022-03-21 15:37:29	15917208	1.18665e-08	3.28232e-11	3.31368e-07	1.03533e-10	6.63511e-10	7.68949e-09	6.56464e-15	3.31202e-07	1.03523e-10	0.0232169	1.98206e-08	70098.9
2022-03-21 15:37:48	15936584	9.32421e-09	4.77299e-11	3.11033e-07	6.93803e-11	5.07484e-10	6.04209e-09	9.54598e-15	3.10877e-07	6.93734e-11	0.0194356	3.07066e-08	62518.5
2022-03-21 15:38:10	15958550	3.61835e-09	3.31406e-11	3.0933e-07	1.93822e-11	4.31904e-10	2.34469e-09	6.62812e-15	3.09175e-07	1.93803e-11	0.00758369	2.14381e-08	24528.8
2022-03-21 15:38:32	15980026	1.84773e-09	3.32737e-11	3.25724e-07	2.89927e-11	3.92205e-10	1.19733e-09	6.65474e-15	3.25561e-07	2.89898e-11	0.00367774	2.04408e-08	11296.6
2022-03-21 15:38:53	16001503	1.01718e-09	2.85642e-11	3.4812e-07	3.36904e-11	3.64216e-10	6.59133e-10	5.71284e-15	3.47946e-07	3.3687e-11	0.00189435	1.64188e-08	5444.39
2022-03-21 15:39:22	16030520	4.63883e-10	2.46635e-11	3.47493e-07	1.90597e-11	4.0694e-10	3.00596e-10	4.9327e-15	3.47319e-07	1.90578e-11	0.000865475	1.42022e-08	2491.87
2022-03-21 15:39:47	16055376	2.62589e-10	1.42411e-11	1.53456e-07	4.31719e-11	6.02336e-10	1.70158e-10	2.84822e-15	1.53379e-07	4.31676e-11	0.00110939	1.85698e-08	7233
2022-03-21 15:40:15	16083483	1.18841e-10	4.44025e-11	4.9077e-08	4.55046e-11	6.25319e-10	7.7009e-11	8.8805e-15	4.90525e-08	4.55e-11	0.00156993	1.81041e-07	32005.1
2022-03-21 15:40:44	16112610	6.90901e-11	2.38547e-11	1.90862e-08	4.43436e-11	5.75861e-10	4.47704e-11	4.77094e-15	1.90767e-08	4.43392e-11	0.00234687	2.50093e-07	123023
2022-03-21 15:41:13	16141217	4.43114e-11	3.38163e-11	1.01509e-08	1.15777e-11	5.38981e-10	2.87138e-11	6.76326e-15	1.01458e-08	1.15765e-11	0.00283011	6.66605e-07	278943
2022-03-21 15:41:41	16169825	5.26211e-11	4.59382e-11	7.31033e-09	2.70147e-11	5.00089e-10	3.40985e-11	9.18764e-15	7.30667e-09	2.7012e-11	0.00466676	1.25743e-06	638698
2022-03-21 15:42:13	16201552	5.14494e-11	3.12261e-11	6.44244e-09	-7.21323e-12	4.59178e-10	3.33392e-11	6.24522e-15	6.43922e-09	-7.21251e-12	0.00517752	9.69872e-07	804061
2022-03-21 15:42:43	16231220	5.09871e-11	4.43513e-11	6.14651e-09	-1.86512e-11	4.4412e-10	3.30396e-11	8.87026e-15	6.14344e-09	-1.86493e-11	0.00537804	1.44386e-06	875412
2022-03-21 15:43:13	16261926	3.91621e-11	3.59766e-11	5.98215e-09	-2.71974e-12	4.13014e-10	2.5377e-11	7.19532e-15	5.97916e-09	-2.71947e-12	0.00424425	1.2034e-06	709841
2022-03-21 15:43:44	16292633	3.92159e-11	3.42053e-11	5.89661e-09	8.38498e-12	4.07685e-10	2.54119e-11	6.84106e-15	5.89366e-09	8.38414e-12	0.00431173	1.16075e-06	731588
2022-03-21 15:44:15	16323340	2.71222e-11	5.43232e-11	5.79838e-09	-3.89149e-12	3.87206e-10	1.75752e-11	1.08646e-14	5.79548e-09	-3.8911e-12	0.00303257	1.87467e-06	523264
2022-03-21 15:44:46	16354047	4.07854e-11	2.14794e-11	5.79661e-09	1.79094e-11	3.66198e-10	2.64289e-11	4.29588e-15	5.79371e-09	1.79076e-11	0.00456166	7.41473e-07	787347
2022-03-21 15:45:16	16384755	3.58404e-11	3.17687e-11	5.74135e-09	2.26502e-11	3.58665e-10	2.32246e-11	6.35374e-15	5.73848e-09	2.26479e-11	0.00404717	1.10722e-06	705268
2022-03-21 15:45:47	16415461	3.85279e-11	1.51626e-11	5.7452e-09	2.53269e-11	3.41028e-10	2.49661e-11	3.03252e-15	5.74233e-09	2.53244e-11	0.00434773	5.28099e-07	757137
2022-03-21 15:46:18	16446168	3.73884e-11	3.68161e-11	5.66869e-09	-1.16529e-11	3.51793e-10	2.42277e-11	7.36322e-15	5.66586e-09	-1.16517e-11	0.00427609	1.29958e-06	754711
2022-03-21 15:46:45	16473625	2.98849e-11	3.80549e-11	5.6762e-09	2.99387e-11	3.50288e-10	1.93654e-11	7.61098e-15	5.67336e-09	2.99357e-11	0.00341339	1.34153e-06	601653
2022-03-21 15:47:16	16504332	2.62084e-11	3.72051e-11	5.64573e-09	2.13279e-11	3.33119e-10	1.6983e-11	7.44102e-15	5.64291e-09	2.13258e-11	0.00300963	1.31865e-06	533347
2022-03-21 15:47:47	16535040	2.77994e-11	3.63349e-11	5.63893e-09	1.46092e-11	3.27682e-10	1.8014e-11	7.26698e-15	5.63611e-09	1.46077e-11	0.00319618	1.28936e-06	567089
2022-03-21 15:48:17	16565746	3.03902e-11	3.7369e-11	5.58594e-09	-9.21273e-12	3.25026e-10	1.96928e-11	7.4738e-15	5.58315e-09	-9.21181e-12	0.0035272	1.33864e-06	631758
2022-03-21 15:48:45	16593203	3.43569e-11	3.4922e-11	5.63023e-09	1.75547e-11	3.15689e-10	2.22633e-11	6.9844e-15	5.62741e-09	1.75529e-11	0.00395622	1.24114e-06	703026
2022-03-21 15:49:15	16623910	2.18117e-11	3.87409e-11	5.58262e-09	-1.12659e-11	3.24074e-10	1.4134e-11	7.74818e-15	5.57983e-09	-1.12648e-11	0.00253305	1.38861e-06	453965
2022-03-21 15:49:46	16654617	2.99387e-11	3.80856e-11	5.57109e-09	-7.43898e-12	3.1446e-10	1.94003e-11	7.61712e-15	5.5683e-09	-7.43824e-12	0.00348405	1.36794e-06	625694
2022-03-21 15:50:17	16685325	2.96377e-11	5.49785e-11	5.58601e-09	1.93177e-11	3.2448e-10	1.92052e-11	1.09957e-14	5.58322e-09	1.93158e-11	0.00343981	1.96942e-06	616099
2022-03-21 15:50:44	16712781	2.80789e-11	3.11135e-11	5.55281e-09	6.00924e-12	3.11327e-10	1.81951e-11	6.2227e-15	5.55003e-09	6.00864e-12	0.00327838	1.1212e-06	590696
2022-03-21 15:51:15	16743488	3.09814e-11	3.99796e-11	5.52588e-09	-9.01923e-12	3.13001e-10	2.00759e-11	7.99592e-15	5.52312e-09	-9.01833e-12	0.00363489	1.44772e-06	658124
2022-03-21 15:51:46	16774195	3.19274e-11	2.8595e-11	5.54724e-09	-1.25989e-11	3.06481e-10	2.0689e-11	5.719e-15	5.54447e-09	-1.25976e-11	0.00373146	1.03148e-06	673006
2022-03-21 15:52:16	16804902	1.72644e-11	4.13209e-11	5.55081e-09	1.39427e-11	3.06374e-10	1.11873e-11	8.26418e-15	5.54803e-09	1.39413e-11	0.00201645	1.48957e-06	363453
2022-03-21 15:52:47	16835610	2.27147e-11	3.49937e-11	5.34788e-09	-6.06299e-12	3.006e-10	1.47191e-11	6.99874e-15	5.34521e-09	-6.06238e-12	0.00275371	1.30935e-06	515173
2022-03-21 15:53:15	16863066	2.10054e-11	4.12082e-11	5.18946e-09	3.34324e-12	3.03817e-10	1.36115e-11	8.24164e-15	5.18687e-09	3.34291e-12	0.00262422	1.58894e-06	505937
2022-03-21 15:53:45	16893772	4.44834e-11	3.59663e-11	5.50876e-09	2.17149e-11	3.01437e-10	2.88252e-11	7.19326e-15	5.50601e-09	2.17127e-11	0.00523524	1.30644e-06	950823
2022-03-21 15:54:16	16924480	3.48944e-11	4.0983e-11	4.62528e-08	3.02074e-12	3.37204e-10	2.26116e-11	8.1966e-15	4.62297e-08	3.02044e-12	0.000489114	1.77302e-07	10580.1
2022-03-21 15:54:43	16951916	1.89414e-11	2.15102e-11	2.43128e-07	-3.10674e-12	2.96569e-10	1.2274e-11	4.30204e-15	2.43006e-07	-3.10643e-12	5.05091e-05	1.77034e-08	207.851
2022-03-21 15:55:13	16981044	2.40799e-11	2.83185e-11	3.19005e-07	-9.10523e-12	2.8006e-10	1.56038e-11	5.6637e-15	3.18845e-07	-9.10432e-12	4.89384e-05	1.77631e-08	153.486
2022-03-21 15:55:41	17009152	1.57272e-11	1.87561e-11	3.65051e-07	-1.13949e-12	2.5383e-10	1.01912e-11	3.75122e-15	3.64868e-07	-1.13938e-12	2.79312e-05	1.0281e-08	76.5515
2022-03-21 15:56:09	17037258	1.13949e-11	1.86026e-11	3.62543e-07	-7.11648e-12	4.39536e-10	7.3839e-12	3.72052e-15	3.62362e-07	-7.11577e-12	2.03771e-05	1.02674e-08	56.2342
2022-03-21 15:56:37	17065364	3.88049e-09	3.55466e-11	3.35041e-07	8.65588e-11	1.64524e-09	2.51456e-09	7.10932e-15	3.34873e-07	8.65501e-11	0.00750898	2.12299e-08	22423.3
2022-03-21 15:57:10	17098804	9.38885e-09	4.13209e-11	3.36922e-07	1.24549e-10	1.46409e-09	6.08397e-09	8.26418e-15	3.36754e-07	1.24537e-10	0.0180666	2.45407e-08	53649.2
2022-03-21 15:57:33	17121830	1.10234e-08	3.3673e-11	3.34503e-07	1.11584e-10	1.11564e-09	7.14316e-09	6.7346e-15	3.34336e-07	1.11573e-10	0.0213652	2.01432e-08	63903.5
2022-03-21 15:57:53	17141206	1.15246e-08	3.66932e-11	3.31278e-07	1.12659e-10	8.99829e-10	7.46794e-09	7.33864e-15	3.31112e-07	1.12648e-10	0.0225541	2.21636e-08	68116.1
2022-03-21 15:58:12	17160580	1.18161e-08	3.44409e-11	3.28949e-07	8.43551e-11	7.4165e-10	7.65683e-09	6.88818e-15	3.28785e-07	8.43467e-11	0.0232883	2.09504e-08	70831.5
2022-03-21 15:58:31	17179958	1.17242e-08	3.85053e-11	3.34862e-07	1.02597e-10	6.50412e-10	7.59728e-09	7.70106e-15	3.34695e-07	1.02587e-10	0.0226991	2.30092e-08	67820.5
2022-03-21 15:58:53	17201924	6.67135e-09	3.12158e-11	3.10405e-07	5.21589e-11	4.78643e-10	4.32303e-09	6.24316e-15	3.1025e-07	5.21537e-11	0.013934	2.0123e-08	44912.3
2022-03-21 15:59:15	17223400	3.06905e-09	3.46968e-11	3.09778e-07	5.56311e-11	4.12139e-10	1.98874e-09	6.93936e-15	3.09623e-07	5.56255e-11	0.00642311	2.24123e-08	20744.9
2022-03-21 15:59:36	17244876	1.58177e-09	1.26542e-11	3.31547e-07	2.87024e-11	3.78983e-10	1.02499e-09	2.53084e-15	3.31381e-07	2.86995e-11	0.00309307	7.63725e-09	9333.89
2022-03-21 15:59:58	17266352	9.25767e-10	2.38035e-11	3.50091e-07	9.59973e-12	3.42026e-10	5.99897e-10	4.7607e-15	3.49916e-07	9.59877e-12	0.0017144	1.36053e-08	4899.47
2022-03-21 16:00:27	17295370	4.37363e-10	2.9373e-11	3.15153e-07	1.82749e-11	4.63401e-10	2.83411e-10	5.8746e-15	3.14995e-07	1.82731e-11	0.000899731	1.86498e-08	2856.33
2022-03-21 16:00:55	17323476	2.09506e-10	3.7031e-11	1.11441e-07	1.36524e-11	6.20788e-10	1.3576e-10	7.4062e-15	1.11385e-07	1.3651e-11	0.00121883	6.64917e-08	10942.5
2022-03-21 16:01:23	17351584	1.03479e-10	4.0512e-11	3.67357e-08	5.50399e-12	6.04364e-10	6.70544e-11	8.1024e-15	3.67173e-08	5.50344e-12	0.00182623	2.2067e-07	49737.6
2022-03-21 16:01:52	17380712	6.04794e-11	3.53828e-11	1.54234e-08	3.05729e-11	5.64159e-10	3.91907e-11	7.07656e-15	1.54157e-08	3.05698e-11	0.00254226	4.59049e-07	164914
2022-03-21 16:02:21	17409320	5.30941e-11	3.88228e-11	9.05067e-09	1.04274e-11	5.17159e-10	3.4405e-11	7.76456e-15	9.04614e-09	1.04264e-11	0.00380328	8.58328e-07	420430
2022-03-21 16:02:49	17437926	4.86651e-11	3.54953e-11	6.97879e-09	1.08574e-11	4.87481e-10	3.1535e-11	7.09906e-15	6.9753e-09	1.08563e-11	0.00452095	1.01774e-06	648137
2022-03-21 16:03:21	17469656	4.56551e-11	3.77272e-11	6.33377e-09	-1.22119e-11	4.47836e-10	2.95845e-11	7.54544e-15	6.3306e-09	-1.22107e-11	0.00467325	1.1919e-06	738200
2022-03-21 16:03:52	17500360	4.09251e-11	4.39418e-11	6.11128e-09	3.72809e-11	4.31343e-10	2.65195e-11	8.78836e-15	6.10822e-09	3.72772e-11	0.0043416	1.43877e-06	710779
2022-03-21 16:04:23	17531068	3.27121e-11	3.14513e-11	5.97719e-09	2.75952e-11	4.02863e-10	2.11974e-11	6.29026e-15	5.9742e-09	2.75924e-11	0.00354816	1.0529e-06	593914
2022-03-21 16:04:53	17561776	2.95624e-11	3.68161e-11	5.88709e-09	3.14867e-11	4.00475e-10	1.91564e-11	7.36322e-15	5.88415e-09	3.14836e-11	0.0032556	1.25137e-06	553284
2022-03-21 16:05:24	17592482	3.10997e-11	3.10213e-11	5.80578e-09	-5.88024e-12	3.7628e-10	2.01526e-11	6.20426e-15	5.80288e-09	-5.87965e-12	0.00347286	1.06917e-06	598473
2022-03-21 16:05:55	17623190	3.31421e-11	3.53009e-11	5.77182e-09	-1.80599e-11	3.73377e-10	2.14761e-11	7.06018e-15	5.76893e-09	-1.80581e-11	0.00372271	1.22383e-06	645303
2022-03-21 16:06:25	17653896	2.46927e-11	3.78296e-11	5.73675e-09	-1.84792e-11	3.54964e-10	1.60009e-11	7.56592e-15	5.73388e-09	-1.84774e-11	0.00279058	1.31951e-06	486683
2022-03-21 16:06:55	17683564	2.22309e-11	3.97339e-11	5.7164e-09	5.85874e-12	3.48353e-10	1.44056e-11	7.94678e-15	5.71354e-09	5.85815e-12	0.00252131	1.39087e-06	441287
2022-03-21 16:07:26	17714270	3.89041e-11	4.17918e-11	5.67098e-09	2.33274e-12	3.53536e-10	2.52099e-11	8.35836e-15	5.66814e-09	2.33251e-12	0.00444764	1.47462e-06	784673
2022-03-21 16:07:56	17744976	3.53674e-11	4.2529e-11	5.66122e-09	2.21449e-12	3.35768e-10	2.29181e-11	8.5058e-15	5.65839e-09	2.21427e-12	0.00405028	1.50322e-06	715801
2022-03-21 16:08:27	17775684	1.99949e-11	2.84926e-11	5.64958e-09	2.71974e-12	3.31329e-10	1.29567e-11	5.69852e-15	5.64676e-09	2.71947e-12	0.00229454	1.00917e-06	406346
2022-03-21 16:08:58	17806392	2.95947e-11	4.36347e-11	5.60506e-09	-2.12419e-11	3.23759e-10	1.91774e-11	8.72694e-15	5.60226e-09	-2.12398e-11	0.00342315	1.55775e-06	611030
2022-03-21 16:09:29	17837098	3.61414e-11	3.57309e-11	5.61331e-09	2.78424e-12	3.21869e-10	2.34196e-11	7.14618e-15	5.6105e-09	2.78396e-12	0.00417425	1.27371e-06	744006
2022-03-21 16:09:59	17867804	1.39534e-11	3.54749e-11	5.5953e-09	-1.02984e-11	3.13661e-10	9.0418e-12	7.09498e-15	5.5925e-09	-1.02974e-11	0.00161677	1.26866e-06	289096
2022-03-21 16:10:30	17898512	2.08442e-11	1.01869e-11	5.55545e-09	-2.50474e-12	2.99871e-10	1.3507e-11	2.03738e-15	5.55267e-09	-2.50449e-12	0.00243253	3.66919e-07	438083
2022-03-21 16:11:01	17929220	4.55799e-12	4.95523e-11	5.57978e-09	3.71949e-12	3.24772e-10	2.95358e-12	9.91046e-15	5.57699e-09	3.71912e-12	0.000529601	1.77703e-06	94961.7
2022-03-21 16:11:31	17959926	2.68964e-11	3.99591e-11	5.54258e-09	-8.04098e-12	3.09737e-10	1.74289e-11	7.99182e-15	5.53981e-09	-8.04018e-12	0.00314611	1.44262e-06	567910
2022-03-21 16:12:02	17990632	3.29487e-11	3.81266e-11	5.51799e-09	-7.76148e-12	3.08532e-10	2.13508e-11	7.62532e-15	5.51523e-09	-7.7607e-12	0.00387124	1.38259e-06	701917
2022-03-21 16:12:33	18021340	2.15322e-11	3.81368e-11	5.53816e-09	-1.68559e-11	3.05361e-10	1.39529e-11	7.62736e-15	5.53539e-09	-1.68542e-11	0.00252066	1.37793e-06	455373
2022-03-21 16:13:04	18052048	1.39964e-11	4.34606e-11	5.54428e-09	-3.55824e-12	3.02251e-10	9.06967e-12	8.69212e-15	5.54151e-09	-3.55788e-12	0.00163668	1.56855e-06	295349
2022-03-21 16:13:34	18082756	1.64044e-11	4.4853e-11	6.13163e-09	-3.82054e-11	2.98719e-10	1.06301e-11	8.9706e-15	6.12856e-09	-3.82016e-11	0.00173451	1.46374e-06	283020
2022-03-21 16:14:05	18113460	2.66922e-11	1.97083e-11	5.13063e-09	-8.78273e-12	2.85765e-10	1.72965e-11	3.94166e-15	5.12806e-09	-8.78185e-12	0.00337292	7.68645e-07	657737
2022-03-21 16:14:36	18144168	2.92292e-11	2.47556e-11	5.4351e-09	-1.27064e-11	2.92346e-10	1.89405e-11	4.95112e-15	5.43238e-09	-1.27051e-11	0.0034866	9.11409e-07	641817
2022-03-21 16:15:06	18174876	3.45719e-11	3.54032e-11	7.89179e-09	1.00189e-11	3.27145e-10	2.24026e-11	7.08064e-15	7.88784e-09	1.00179e-11	0.00284014	8.97665e-07	360066
2022-03-21 16:15:37	18205582	3.29594e-11	4.09318e-11	2.28437e-07	-3.97749e-12	3.06266e-10	2.13577e-11	8.18636e-15	2.28323e-07	-3.97709e-12	9.35417e-05	3.58543e-08	409.69
2022-03-21 16:16:09	18237830	2.88529e-11	2.82059e-11	3.22141e-07	1.10939e-11	2.84229e-10	1.86967e-11	5.64118e-15	3.2198e-07	1.10928e-11	5.80678e-05	1.75203e-08	180.346
2022-03-21 16:16:37	18265936	1.63722e-11	4.1802e-11	3.64066e-07	6.05224e-12	2.6673e-10	1.06092e-11	8.3604e-15	3.63884e-07	6.05163e-12	2.91554e-05	2.29755e-08	80.1228
2022-03-21 16:17:06	18294044	1.61034e-11	3.22294e-11	3.60751e-07	-8.78273e-12	3.25755e-10	1.0435e-11	6.44588e-15	3.60571e-07	-8.78185e-12	2.89402e-05	1.78769e-08	80.2624
2022-03-21 16:17:34	18322152	2.80396e-09	2.35578e-11	3.55734e-07	6.66498e-11	1.56536e-09	1.81697e-09	4.71156e-15	3.55556e-07	6.66431e-11	0.00511021	1.32512e-08	14372.4
2022-03-21 16:18:07	18355588	9.06489e-09	2.84823e-11	3.35309e-07	1.46844e-10	1.5001e-09	5.87405e-09	5.69646e-15	3.35141e-07	1.46829e-10	0.0175271	1.69972e-08	52297.6
2022-03-21 16:18:30	18378616	1.08507e-08	3.9181e-11	3.35399e-07	1.48435e-10	1.14923e-09	7.03125e-09	7.8362e-15	3.35231e-07	1.4842e-10	0.0209743	2.33755e-08	62566.8
2022-03-21 16:18:49	18397992	1.14338e-08	2.89328e-11	3.30472e-07	1.53165e-10	9.204e-10	7.4091e-09	5.78656e-15	3.30307e-07	1.5315e-10	0.022431	1.75187e-08	67909.5
2022-03-21 16:19:09	18417368	1.16798e-08	3.07347e-11	3.2868e-07	1.34729e-10	7.61957e-10	7.56851e-09	6.14694e-15	3.28516e-07	1.34716e-10	0.0230385	1.87113e-08	70129.1
2022-03-21 16:19:28	18436744	1.18995e-08	4.17509e-11	3.3083e-07	1.18873e-10	6.74454e-10	7.71088e-09	8.35018e-15	3.30665e-07	1.18861e-10	0.0233193	2.52527e-08	70522.6
2022-03-21 16:19:48	18456120	9.95792e-09	3.0448e-11	3.11928e-07	8.71931e-11	5.09518e-10	6.45273e-09	6.0896e-15	3.11772e-07	8.71844e-11	0.020697	1.95322e-08	66384.9
2022-03-21 16:20:10	18478086	3.69208e-09	3.7543e-11	3.07897e-07	2.13387e-11	4.2348e-10	2.39247e-09	7.5086e-15	3.07743e-07	2.13366e-11	0.00777424	2.43989e-08	25262.1
2022-03-21 16:20:31	18499564	1.87617e-09	2.53802e-11	3.25813e-07	1.23947e-11	3.90224e-10	1.21576e-09	5.07604e-15	3.2565e-07	1.23935e-11	0.00373333	1.55874e-08	11464.2
2022-03-21 16:20:53	18521040	1.00977e-09	3.91196e-11	3.46955e-07	1.17067e-11	3.60784e-10	6.54331e-10	7.82392e-15	3.46782e-07	1.17055e-11	0.00188687	2.25615e-08	5441.09
2022-03-21 16:21:22	18550056	4.90897e-10	3.54851e-11	3.57705e-07	-7.79373e-12	3.6381e-10	3.18101e-10	7.09702e-15	3.57526e-07	-7.79295e-12	0.000889729	1.98504e-08	2488.57
2022-03-21 16:21:46	18574916	2.47443e-10	3.31509e-11	1.56323e-07	-2.24244e-11	6.2614e-10	1.60343e-10	6.63018e-15	1.56245e-07	-2.24222e-11	0.00102623	4.24346e-08	6568.09
2022-03-21 16:22:15	18603020	1.19959e-10	3.42053e-11	5.02007e-08	4.75149e-12	6.24581e-10	7.77334e-11	6.84106e-15	5.01756e-08	4.75101e-12	0.00154923	1.36342e-07	30876.1
2022-03-21 16:22:40	18628900	8.34198e-11	3.64475e-11	2.12658e-08	-1.00834e-11	5.77711e-10	5.4056e-11	7.2895e-15	2.12552e-08	-1.00824e-11	0.00254319	3.42952e-07	119651
2022-03-21 16:23:09	18657504	6.39946e-11	4.28668e-11	1.08467e-08	-1.19324e-12	5.41899e-10	4.14685e-11	8.57336e-15	1.08413e-08	-1.19312e-12	0.00382506	7.90807e-07	352823
2022-03-21 16:23:38	18686112	5.31264e-11	4.03891e-11	7.6392e-09	-2.44024e-12	4.97033e-10	3.44259e-11	8.07782e-15	7.63538e-09	-2.44e-12	0.00450874	1.05795e-06	590506
2022-03-21 16:24:06	18714720	3.64854e-11	3.18097e-11	6.56522e-09	3.35184e-11	4.62779e-10	2.36425e-11	6.36194e-15	6.56194e-09	3.3515e-11	0.00360298	9.69522e-07	549073
2022-03-21 16:24:38	18746448	4.10971e-11	3.16253e-11	6.17561e-09	-1.21474e-12	4.31327e-10	2.66309e-11	6.32506e-15	6.17252e-09	-1.21462e-12	0.00431443	1.02471e-06	698974
2022-03-21 16:25:09	18777156	3.29164e-11	4.2918e-11	5.99991e-09	1.63077e-11	4.27242e-10	2.13298e-11	8.5836e-15	5.99691e-09	1.63061e-11	0.0035568	1.43134e-06	593106
2022-03-21 16:25:39	18807860	4.13444e-11	3.30382e-11	5.90484e-09	1.18249e-13	3.96029e-10	2.67912e-11	6.60764e-15	5.90189e-09	1.18237e-13	0.00453942	1.11958e-06	769148
2022-03-21 16:26:10	18838568	3.52599e-11	4.2099e-11	5.84908e-09	1.56734e-11	3.88726e-10	2.28484e-11	8.4198e-15	5.84616e-09	1.56718e-11	0.00390828	1.44023e-06	668521
2022-03-21 16:26:41	18869276	4.35911e-11	4.0082e-11	5.80878e-09	3.30024e-11	3.80234e-10	2.8247e-11	8.0164e-15	5.80588e-09	3.29991e-11	0.00486525	1.38074e-06	837987
2022-03-21 16:27:11	18899982	2.68749e-11	2.77145e-11	5.76049e-09	2.23599e-11	3.62934e-10	1.74149e-11	5.5429e-15	5.75761e-09	2.23577e-11	0.00302468	9.62709e-07	525336
2022-03-21 16:27:42	18930690	3.80119e-11	4.63887e-11	5.72543e-09	1.43942e-11	3.6457e-10	2.46317e-11	9.27774e-15	5.72257e-09	1.43928e-11	0.00430431	1.62125e-06	752164
2022-03-21 16:28:13	18961396	3.07449e-11	3.16151e-11	5.6901e-09	-2.12849e-12	3.41227e-10	1.99227e-11	6.32302e-15	5.68725e-09	-2.12828e-12	0.00350304	1.11179e-06	615946
2022-03-21 16:28:44	18992104	3.49911e-11	2.97416e-11	5.6566e-09	-6.81548e-12	3.3811e-10	2.26742e-11	5.94832e-15	5.65377e-09	-6.8148e-12	0.00401046	1.0521e-06	709343
2022-03-21 16:29:14	19022810	3.20242e-11	2.51345e-11	5.65352e-09	2.97237e-11	3.3285e-10	2.07517e-11	5.0269e-15	5.65069e-09	2.97207e-11	0.00367241	8.89608e-07	649905
2022-03-21 16:29:45	19053516	3.54749e-11	3.95804e-11	5.64848e-09	2.61224e-11	3.28596e-10	2.29877e-11	7.91608e-15	5.64566e-09	2.61198e-11	0.00407176	1.40215e-06	721219
2022-03-21 16:30:16	19084224	2.18009e-11	2.9588e-11	5.6282e-09	-9.38473e-12	3.18499e-10	1.4127e-11	5.9176e-15	5.62539e-09	-9.38379e-12	0.00251129	1.05195e-06	446421
2022-03-21 16:30:46	19114932	2.25857e-11	3.35399e-11	5.60843e-09	1.42652e-11	3.17976e-10	1.46355e-11	6.70798e-15	5.60563e-09	1.42638e-11	0.00261087	1.19665e-06	465758
2022-03-21 16:31:17	19145638	3.07019e-11	3.99694e-11	5.58415e-09	2.09409e-11	3.26515e-10	1.98948e-11	7.99388e-15	5.58136e-09	2.09388e-11	0.00356451	1.43225e-06	638646
2022-03-21 16:31:48	19176344	3.24541e-11	3.34477e-11	5.56798e-09	-1.46199e-12	3.16334e-10	2.10303e-11	6.68954e-15	5.5652e-09	-1.46184e-12	0.00377889	1.20203e-06	679022
2022-03-21 16:32:19	19207052	1.72537e-11	2.73151e-11	5.54182e-09	-2.08442e-11	3.0447e-10	1.11804e-11	5.46302e-15	5.53905e-09	-2.08421e-11	0.00201847	9.86274e-07	364407
2022-03-21 16:32:49	19237760	2.41874e-11	2.90659e-11	5.54774e-09	-2.23599e-11	3.11404e-10	1.56734e-11	5.81318e-15	5.54497e-09	-2.23577e-11	0.00282661	1.04837e-06	509761
2022-03-21 16:33:20	19268466	1.59207e-11	3.43077e-11	5.56244e-09	2.17149e-11	3.07687e-10	1.03166e-11	6.86154e-15	5.55966e-09	2.17127e-11	0.00185562	1.23417e-06	333765
2022-03-21 16:33:51	19299172	2.09087e-11	4.27132e-11	5.53271e-09	1.10402e-11	3.00139e-10	1.35488e-11	8.54264e-15	5.52994e-09	1.10391e-11	0.00245009	1.5448e-06	443058
2022-03-21 16:34:21	19329880	2.49292e-11	2.92092e-11	5.53443e-09	5.93399e-12	2.90948e-10	1.61541e-11	5.84184e-15	5.53166e-09	5.9334e-12	0.0029203	1.05607e-06	527925
2022-03-21 16:34:52	19360588	1.92317e-11	4.38496e-11	5.20283e-09	-5.95549e-12	2.90833e-10	1.24621e-11	8.76992e-15	5.20023e-09	-5.95489e-12	0.00239646	1.68645e-06	460838
2022-03-21 16:35:23	19391296	3.01107e-11	4.0553e-11	5.30554e-09	-1.04274e-12	3.0308e-10	1.95117e-11	8.1106e-15	5.30289e-09	-1.04264e-12	0.00367945	1.52947e-06	693859
2022-03-21 16:35:54	19422000	2.86164e-11	3.77068e-11	5.55243e-09	7.41748e-13	2.98028e-10	1.85434e-11	7.54136e-15	5.54965e-09	7.41674e-13	0.00334137	1.35889e-06	602086
2022-03-21 16:36:24	19452708	1.90059e-11	1.5869e-11	1.17802e-07	2.09624e-12	3.07403e-10	1.23158e-11	3.1738e-15	1.17743e-07	2.09603e-12	0.000104599	2.69553e-08	888.367
2022-03-21 16:36:56	19484956	3.44106e-11	4.1761e-11	2.80305e-07	8.55698e-12	2.91724e-10	2.22981e-11	8.3522e-15	2.80165e-07	8.55612e-12	7.95891e-05	2.98117e-08	284.08
2022-03-21 16:37:25	19513064	2.07904e-11	2.66907e-11	3.47045e-07	-9.91148e-12	2.84606e-10	1.34722e-11	5.33814e-15	3.46871e-07	-9.91049e-12	3.88391e-05	1.53894e-08	111.97
2022-03-21 16:37:53	19541170	8.82573e-12	3.54032e-11	3.75622e-07	-8.33123e-12	2.52755e-10	5.71907e-12	7.08064e-15	3.75434e-07	-8.3304e-12	1.52332e-05	1.88599e-08	40.575
2022-03-21 16:38:21	19569276	8.57311e-11	3.69491e-11	3.50359e-07	3.73991e-11	1.18521e-09	5.55538e-11	7.38982e-15	3.50184e-07	3.73954e-11	0.000158642	2.11027e-08	453.024
2022-03-21 16:38:54	19602716	7.16264e-09	3.32737e-11	3.34145e-07	1.25011e-10	1.64081e-09	4.64139e-09	6.65474e-15	3.33978e-07	1.24998e-10	0.0138973	1.99257e-08	41611.4
2022-03-21 16:39:16	19624192	9.8919e-09	4.32149e-11	3.35937e-07	1.21442e-10	1.35906e-09	6.40995e-09	8.64298e-15	3.35769e-07	1.2143e-10	0.0190904	2.57408e-08	56855.6
2022-03-21 16:39:39	19647218	1.12552e-08	2.87894e-11	3.33249e-07	1.47242e-10	1.03518e-09	7.29337e-09	5.75788e-15	3.33082e-07	1.47227e-10	0.0218966	1.72867e-08	65739.3
2022-03-21 16:39:58	19666596	1.16543e-08	4.47301e-11	3.30472e-07	1.38535e-10	8.49971e-10	7.55199e-09	8.94602e-15	3.30307e-07	1.38521e-10	0.0228636	2.7084e-08	69219.2
2022-03-21 16:40:17	19685972	1.18182e-08	2.73254e-11	3.29845e-07	1.40534e-10	7.12578e-10	7.65819e-09	5.46508e-15	3.2968e-07	1.4052e-10	0.0232292	1.65769e-08	70459.7
2022-03-21 16:40:37	19705346	1.12626e-08	2.66907e-11	3.35309e-07	1.0565e-10	5.73573e-10	7.29816e-09	5.33814e-15	3.35141e-07	1.05639e-10	0.0217764	1.5928e-08	64976.7
2022-03-21 16:40:59	19727312	5.44463e-09	3.17482e-11	3.08793e-07	4.17851e-11	4.60436e-10	3.52812e-09	6.34964e-15	3.08639e-07	4.17809e-11	0.0114312	2.05731e-08	37037.6
2022-03-21 16:41:20	19748790	2.65527e-09	3.93039e-11	3.12645e-07	2.47357e-11	4.12392e-10	1.72061e-09	7.86078e-15	3.12489e-07	2.47332e-11	0.00550617	2.51554e-08	17620.4
2022-03-21 16:41:42	19770266	1.38872e-09	3.63758e-11	3.37191e-07	-2.12849e-12	3.76894e-10	8.99891e-10	7.27516e-15	3.37022e-07	-2.12828e-12	0.00267012	2.15866e-08	7922.68
2022-03-21 16:42:11	19799284	6.44504e-10	2.31073e-11	3.58333e-07	3.30562e-11	3.33418e-10	4.17639e-10	4.62146e-15	3.58154e-07	3.30529e-11	0.00116609	1.29036e-08	3255.83
2022-03-21 16:42:39	19827390	3.22521e-10	2.65166e-11	2.14731e-07	2.27899e-12	5.43557e-10	2.08994e-10	5.30332e-15	2.14624e-07	2.27876e-12	0.000973768	2.47099e-08	4537.1
2022-03-21 16:43:07	19855496	1.5395e-10	3.81675e-11	6.79292e-08	4.81599e-12	6.01208e-10	9.97596e-11	7.6335e-15	6.78952e-08	4.81551e-12	0.00146932	1.12431e-07	21640.9
2022-03-21 16:43:36	19884624	8.47313e-11	2.81751e-11	2.459e-08	1.89629e-11	5.75769e-10	5.49059e-11	5.63502e-15	2.45777e-08	1.8961e-11	0.00223397	2.29274e-07	90894.2
2022-03-21 16:44:05	19913232	6.91546e-11	2.67111e-11	1.18154e-08	3.54749e-12	5.4206e-10	4.48122e-11	5.34222e-15	1.18095e-08	3.54714e-12	0.00379459	4.52367e-07	321317
2022-03-21 16:44:33	19941838	5.69641e-11	4.2959e-11	7.92641e-09	-6.60048e-12	5.01256e-10	3.69127e-11	8.5918e-15	7.92245e-09	-6.59982e-12	0.00465926	1.08449e-06	588109
2022-03-21 16:45:02	19970444	5.27609e-11	3.28949e-11	6.59439e-09	-3.42279e-11	4.69282e-10	3.41891e-11	6.57898e-15	6.59109e-09	-3.42245e-11	0.00518716	9.98162e-07	786996
2022-03-21 16:45:34	20002172	4.45049e-11	4.13004e-11	6.18784e-09	-1.23517e-11	4.43598e-10	2.88392e-11	8.26008e-15	6.18475e-09	-1.23505e-11	0.00466295	1.33556e-06	753944
2022-03-21 16:46:04	20032880	4.00866e-11	4.54366e-11	6.00458e-09	-9.67498e-14	4.29446e-10	2.59761e-11	9.08732e-15	6.00158e-09	-9.67401e-14	0.00432821	1.51416e-06	721179
2022-03-21 16:46:35	20063586	3.80011e-11	4.65115e-11	5.91867e-09	2.21342e-11	4.09451e-10	2.46247e-11	9.3023e-15	5.91571e-09	2.2132e-11	0.0041626	1.57247e-06	703651
2022-03-21 16:47:06	20094292	3.50879e-11	3.34272e-11	5.84796e-09	1.66517e-11	3.86377e-10	2.2737e-11	6.68544e-15	5.84504e-09	1.665e-11	0.00388996	1.14378e-06	665515
2022-03-21 16:47:37	20125000	3.47439e-11	3.75123e-11	5.78801e-09	-6.08449e-12	3.69922e-10	2.2514e-11	7.50246e-15	5.78512e-09	-6.08388e-12	0.00389172	1.29686e-06	672712
2022-03-21 16:48:07	20155708	1.61894e-11	3.25366e-11	5.74821e-09	1.43942e-11	3.55847e-10	1.04907e-11	6.50732e-15	5.74534e-09	1.43928e-11	0.00182596	1.13263e-06	317815
2022-03-21 16:48:38	20186416	4.10111e-11	3.28744e-11	5.71308e-09	3.77324e-12	3.58589e-10	2.65752e-11	6.57488e-15	5.71022e-09	3.77286e-12	0.00465397	1.15142e-06	815024
2022-03-21 16:49:09	20217120	1.49317e-11	6.30972e-11	5.69858e-09	-4.16024e-12	3.42779e-10	9.67574e-12	1.26194e-14	5.69573e-09	-4.15982e-12	0.00169877	2.2156e-06	298253
2022-03-21 16:49:39	20247828	1.27709e-11	3.20758e-11	5.66585e-09	-4.26774e-12	3.38509e-10	8.27554e-12	6.41516e-15	5.66302e-09	-4.26731e-12	0.00146133	1.13282e-06	258048
2022-03-21 16:50:10	20278536	2.18547e-11	4.07987e-11	5.62765e-09	9.34173e-12	3.39339e-10	1.41618e-11	8.15974e-15	5.62484e-09	9.3408e-12	0.00251773	1.45066e-06	447610
2022-03-21 16:50:41	20309242	1.34159e-11	4.55799e-11	5.63986e-09	-3.88074e-12	3.3682e-10	8.6935e-12	9.11598e-15	5.63704e-09	-3.88035e-12	0.00154221	1.61716e-06	273585
2022-03-21 16:51:11	20339950	3.28519e-11	3.06426e-11	5.60816e-09	-1.45769e-11	3.21724e-10	2.1288e-11	6.12852e-15	5.60536e-09	-1.45754e-11	0.0037978	1.09333e-06	677531
2022-03-21 16:51:42	20370656	3.86031e-11	4.71053e-11	5.58558e-09	-2.70684e-11	3.21801e-10	2.50148e-11	9.42106e-15	5.58279e-09	-2.70657e-11	0.0044807	1.68752e-06	802592
2022-03-21 16:52:13	20401364	4.16024e-11	4.52523e-11	5.602e-09	2.26072e-11	3.14874e-10	2.69584e-11	9.05046e-15	5.5992e-09	2.26049e-11	0.00481468	1.61638e-06	859887
2022-03-21 16:52:44	20432070	1.38997e-11	4.01434e-11	5.59166e-09	1.48994e-11	3.2114e-10	9.00701e-12	8.02868e-15	5.58886e-09	1.48979e-11	0.0016116	1.43655e-06	288359
2022-03-21 16:53:14	20462776	1.87694e-11	3.5649e-11	5.57592e-09	2.23062e-11	3.04854e-10	1.21626e-11	7.1298e-15	5.57313e-09	2.2304e-11	0.00218236	1.27932e-06	391586
2022-03-21 16:53:45	20493484	2.38972e-11	4.15461e-11	5.5553e-09	1.01049e-12	3.12716e-10	1.54854e-11	8.30922e-15	5.55252e-09	1.01039e-12	0.00278889	1.49648e-06	502275
2022-03-21 16:54:16	20524192	8.75048e-12	4.46072e-11	5.55884e-09	5.48249e-13	3.11511e-10	5.67031e-12	8.92144e-15	5.55606e-09	5.48194e-13	0.00102056	1.60571e-06	183685
2022-03-21 16:54:46	20554898	2.75737e-11	3.09907e-11	5.53493e-09	5.53624e-12	3.00876e-10	1.78678e-11	6.19814e-15	5.53216e-09	5.53569e-12	0.0032298	1.12038e-06	583822
2022-03-21 16:55:17	20585604	1.77267e-11	3.42053e-11	5.52583e-09	7.41748e-13	2.94465e-10	1.14869e-11	6.84106e-15	5.52307e-09	7.41674e-13	0.0020798	1.23863e-06	376567
2022-03-21 16:55:48	20616312	1.20937e-11	4.33275e-11	5.25216e-09	1.40717e-11	3.09553e-10	7.83672e-12	8.6655e-15	5.24953e-09	1.40703e-11	0.00149284	1.65072e-06	284376
2022-03-21 16:56:19	20647020	2.95947e-11	4.1331e-11	5.22684e-09	-2.67352e-11	3.00078e-10	1.91774e-11	8.2662e-15	5.22423e-09	-2.67325e-11	0.00367085	1.58228e-06	702660
2022-03-21 16:56:49	20677726	5.06539e-11	3.68468e-11	5.51928e-09	-3.29056e-11	2.91416e-10	3.28237e-11	7.36936e-15	5.51652e-09	-3.29023e-11	0.00595008	1.33587e-06	1.07859e+06
2022-03-21 16:57:20	20708432	2.23384e-11	3.15639e-11	8.16287e-08	2.03604e-11	3.26246e-10	1.44753e-11	6.31278e-15	8.15879e-08	2.03584e-11	0.00017742	7.7374e-08	2174.58
2022-03-21 16:57:52	20740160	1.57487e-11	2.27899e-11	2.79409e-07	-7.19173e-12	2.83492e-10	1.02052e-11	4.55798e-15	2.79269e-07	-7.19101e-12	3.65424e-05	1.63211e-08	130.85
2022-03-21 16:58:21	20769288	8.92248e-12	2.24726e-11	3.4382e-07	-1.24807e-11	2.6944e-10	5.78177e-12	4.49452e-15	3.43648e-07	-1.24795e-11	1.68247e-05	1.30788e-08	48.959
2022-03-21 16:58:49	20797396	1.13089e-11	2.44383e-11	3.57705e-07	-1.38137e-11	2.6749e-10	7.32817e-12	4.88766e-15	3.57526e-07	-1.38123e-11	2.04969e-05	1.36708e-08	57.3297
2022-03-21 16:59:17	20825500	1.91994e-11	3.2598e-11	3.70605e-07	1.90274e-11	8.95414e-10	1.24412e-11	6.5196e-15	3.7042e-07	1.90255e-11	3.35868e-05	1.76006e-08	90.6723
2022-03-21 16:59:50	20858940	6.59392e-09	3.88023e-11	3.33338e-07	1.35385e-10	1.6576e-09	4.27286e-09	7.76046e-15	3.33171e-07	1.35371e-10	0.0128248	2.32927e-08	38493.1
2022-03-21 17:00:12	20880416	9.4848e-09	3.27106e-11	3.3513e-07	1.19733e-10	1.45328e-09	6.14615e-09	6.54212e-15	3.34962e-07	1.19721e-10	0.0183488	1.95309e-08	54778.6
2022-03-21 17:00:32	20900192	1.0897e-08	5.31663e-11	3.33876e-07	7.50348e-11	1.12701e-09	7.06126e-09	1.06333e-14	3.33709e-07	7.50273e-11	0.0211599	3.18639e-08	63408.3
2022-03-21 17:00:51	20919568	1.14406e-08	3.62939e-11	3.30292e-07	9.29873e-11	9.03957e-10	7.41351e-09	7.25878e-15	3.30127e-07	9.2978e-11	0.0224565	2.19879e-08	68024
2022-03-21 17:01:10	20938944	1.17766e-08	4.45868e-11	3.29487e-07	6.84773e-11	7.58921e-10	7.63124e-09	8.91736e-15	3.29322e-07	6.84705e-11	0.0231726	2.70779e-08	70364.4
2022-03-21 17:01:30	20958320	1.18686e-08	3.36423e-11	3.32174e-07	5.50614e-11	6.61093e-10	7.69085e-09	6.72846e-15	3.32008e-07	5.50559e-11	0.0231647	2.0266e-08	69771.4
2022-03-21 17:01:49	20977696	9.29196e-09	3.35706e-11	3.09688e-07	6.85848e-12	4.97686e-10	6.02119e-09	6.71412e-15	3.09533e-07	6.85779e-12	0.0194525	2.16911e-08	62844.6
2022-03-21 17:02:11	20999664	3.53588e-09	3.5178e-11	3.08345e-07	2.48862e-11	4.24424e-10	2.29125e-09	7.0356e-15	3.08191e-07	2.48837e-11	0.00743452	2.28287e-08	24123.1
2022-03-21 17:02:33	21021140	1.81149e-09	2.91888e-11	3.27426e-07	1.97369e-11	3.88013e-10	1.17385e-09	5.83776e-15	3.27262e-07	1.97349e-11	0.00358686	1.78382e-08	10960.2
2022-03-21 17:02:54	21042616	1.00216e-09	2.97621e-11	3.47583e-07	-1.50499e-13	3.60155e-10	6.494e-10	5.95242e-15	3.47409e-07	-1.50484e-13	0.00186926	1.71337e-08	5380.58
2022-03-21 17:03:23	21071632	4.78245e-10	2.74585e-11	3.42745e-07	1.84362e-11	4.16416e-10	3.09903e-10	5.4917e-15	3.42574e-07	1.84344e-11	0.000904631	1.60307e-08	2640.69
2022-03-21 17:03:51	21099740	2.07625e-10	3.88637e-11	1.30433e-07	3.38624e-11	6.09501e-10	1.34541e-10	7.77274e-15	1.30368e-07	3.3859e-11	0.00103201	5.96216e-08	7916.15
2022-03-21 17:04:19	21127846	1.23796e-10	3.94063e-11	4.23807e-08	2.93904e-11	6.05116e-10	8.02198e-11	7.88126e-15	4.23595e-08	2.93875e-11	0.00189379	1.86056e-07	44707.4
2022-03-21 17:04:48	21156976	6.64886e-11	3.33044e-11	1.70957e-08	2.33489e-11	5.64496e-10	4.30846e-11	6.66088e-15	1.70872e-08	2.33466e-11	0.00252146	3.89818e-07	147565
2022-03-21 17:05:17	21185580	5.66094e-11	4.58461e-11	9.58367e-09	2.31232e-11	5.29106e-10	3.66829e-11	9.16922e-15	9.57888e-09	2.31209e-11	0.00382956	9.57233e-07	399792
2022-03-21 17:05:46	21214188	6.32851e-11	4.0297e-11	7.12453e-09	1.78019e-11	4.86052e-10	4.10087e-11	8.0594e-15	7.12097e-09	1.78001e-11	0.00575887	1.13178e-06	808720
2022-03-21 17:06:17	21245916	3.94739e-11	3.45944e-11	6.36811e-09	-1.07069e-11	4.59569e-10	2.55791e-11	6.91888e-15	6.36493e-09	-1.07058e-11	0.00401876	1.08703e-06	631391
2022-03-21 17:06:48	21276622	2.53592e-11	4.37575e-11	6.10093e-09	5.88131e-11	4.34069e-10	1.64328e-11	8.7515e-15	6.09788e-09	5.88072e-11	0.00269483	1.43517e-06	441929
2022-03-21 17:07:19	21307330	2.70039e-11	3.50449e-11	5.97098e-09	2.28114e-11	4.11563e-10	1.74985e-11	7.00898e-15	5.96799e-09	2.28091e-11	0.00293206	1.17443e-06	491298
2022-03-21 17:07:50	21338036	2.72082e-11	3.30894e-11	5.86625e-09	9.79323e-12	3.92044e-10	1.76309e-11	6.61788e-15	5.86332e-09	9.79225e-12	0.00300699	1.12869e-06	512847
2022-03-21 17:08:20	21368744	5.02239e-11	4.41056e-11	5.8143e-09	2.58214e-11	3.91368e-10	3.25451e-11	8.82112e-15	5.81139e-09	2.58188e-11	0.00560022	1.5179e-06	963663
2022-03-21 17:08:48	21396200	4.62249e-11	2.7049e-11	5.78575e-09	2.85627e-11	3.62451e-10	2.99537e-11	5.4098e-15	5.78286e-09	2.85598e-11	0.00517975	9.35489e-07	895707
2022-03-21 17:09:18	21426908	2.25427e-11	3.74201e-11	5.72923e-09	2.12849e-11	3.562e-10	1.46077e-11	7.48402e-15	5.72637e-09	2.12828e-11	0.00255095	1.30694e-06	445474
2022-03-21 17:09:49	21457616	3.07019e-11	3.0407e-11	5.75395e-09	2.72727e-11	3.52684e-10	1.98948e-11	6.0814e-15	5.75107e-09	2.727e-11	0.00345933	1.05744e-06	601510
2022-03-21 17:10:17	21485072	3.14652e-11	3.2127e-11	5.67855e-09	-7.25623e-12	3.48476e-10	2.03894e-11	6.4254e-15	5.67571e-09	-7.2555e-12	0.0035924	1.13209e-06	632944
2022-03-21 17:10:47	21515778	3.51846e-11	5.2419e-11	5.66387e-09	3.56576e-11	3.43101e-10	2.27996e-11	1.04838e-14	5.66104e-09	3.5654e-11	0.00402746	1.85192e-06	711435
2022-03-21 17:11:18	21546484	2.55957e-11	3.92732e-11	5.62956e-09	-3.53674e-12	3.24879e-10	1.6586e-11	7.85464e-15	5.62675e-09	-3.53639e-12	0.00294771	1.39595e-06	523875
2022-03-21 17:11:49	21577192	3.73669e-11	2.28002e-11	5.62799e-09	1.09327e-11	3.24934e-10	2.42138e-11	4.56004e-15	5.62518e-09	1.09316e-11	0.00430453	8.10648e-07	765226
2022-03-21 17:12:19	21607900	3.16479e-11	4.07066e-11	5.60664e-09	1.98014e-11	3.27084e-10	2.05078e-11	8.14132e-15	5.60384e-09	1.97994e-11	0.00365961	1.45281e-06	653054
2022-03-21 17:12:50	21638606	1.98874e-11	3.0837e-11	5.58683e-09	-1.29752e-11	3.11526e-10	1.2887e-11	6.1674e-15	5.58404e-09	-1.29739e-11	0.00230784	1.10447e-06	413292
2022-03-21 17:13:21	21669312	2.77134e-11	3.88125e-11	5.56505e-09	1.53724e-11	3.15957e-10	1.79583e-11	7.7625e-15	5.56227e-09	1.53709e-11	0.00322859	1.39556e-06	580445
2022-03-21 17:13:52	21700020	2.23707e-11	3.87715e-11	5.57502e-09	-1.93069e-11	3.10621e-10	1.44962e-11	7.7543e-15	5.57223e-09	-1.9305e-11	0.00260151	1.3916e-06	466870
2022-03-21 17:14:22	21730728	2.96054e-11	4.95625e-11	5.56473e-09	6.61123e-12	3.14444e-10	1.91843e-11	9.9125e-15	5.56195e-09	6.61057e-12	0.00344921	1.7822e-06	620143
2022-03-21 17:14:53	21761436	1.85007e-11	3.90685e-11	5.55028e-09	8.99773e-12	3.08731e-10	1.19885e-11	7.8137e-15	5.5475e-09	8.99683e-12	0.00216105	1.40851e-06	389554
2022-03-21 17:15:24	21792140	3.50019e-11	3.56899e-11	5.56283e-09	1.93499e-12	2.93106e-10	2.26812e-11	7.13798e-15	5.56005e-09	1.9348e-12	0.00407932	1.2838e-06	733685
2022-03-21 17:15:54	21822848	9.59973e-12	3.67444e-11	5.55782e-09	1.16099e-11	2.96446e-10	6.22063e-12	7.34888e-15	5.55504e-09	1.16087e-11	0.00111982	1.32292e-06	201586
2022-03-21 17:16:25	21853556	2.09194e-11	3.8403e-11	5.50169e-09	-3.59586e-11	2.98112e-10	1.35558e-11	7.6806e-15	5.49894e-09	-3.5955e-11	0.00246516	1.39674e-06	448298
2022-03-21 17:16:53	21881012	2.26717e-11	3.48504e-11	5.18866e-09	-2.16827e-11	2.97498e-10	1.46913e-11	6.97008e-15	5.18607e-09	-2.16805e-11	0.00283283	1.344e-06	546239
2022-03-21 17:17:23	21911720	2.48432e-11	2.72947e-11	5.29969e-09	1.37707e-11	2.94887e-10	1.60984e-11	5.45894e-15	5.29704e-09	1.37693e-11	0.00303913	1.03056e-06	573741
2022-03-21 17:17:54	21942426	3.12609e-11	3.17687e-11	5.52531e-09	3.12932e-11	3.01767e-10	2.02571e-11	6.35374e-15	5.52255e-09	3.12901e-11	0.00366807	1.15051e-06	664198
2022-03-21 17:18:25	21973132	1.64152e-11	3.25468e-11	1.21027e-07	-7.35298e-12	3.19681e-10	1.0637e-11	6.50936e-15	1.20966e-07	-7.35224e-12	8.79339e-05	5.38113e-08	726.927
2022-03-21 17:18:57	22005380	2.86917e-11	3.53725e-11	2.84068e-07	-3.10674e-12	2.86786e-10	1.85922e-11	7.0745e-15	2.83926e-07	-3.10643e-12	6.54826e-05	2.49167e-08	230.633
2022-03-21 17:19:25	22033488	1.57379e-11	3.10726e-11	3.47762e-07	3.22499e-13	2.72965e-10	1.01982e-11	6.21452e-15	3.47588e-07	3.22467e-13	2.93398e-05	1.7879e-08	84.4096
2022-03-21 17:19:53	22061596	1.70279e-11	1.70259e-11	3.71859e-07	2.25642e-11	2.5009e-10	1.10341e-11	3.40518e-15	3.71673e-07	2.25619e-11	2.96876e-05	9.16176e-09	79.8756
2022-03-21 17:20:21	22089702	1.12283e-10	4.79142e-11	3.55107e-07	3.15942e-11	1.17364e-09	7.27594e-11	9.58284e-15	3.54929e-07	3.1591e-11	0.000204997	2.69993e-08	577.57
2022-03-21 17:20:55	22123140	7.23431e-09	4.26313e-11	3.33697e-07	1.2471e-10	1.62609e-09	4.68783e-09	8.52626e-15	3.3353e-07	1.24698e-10	0.0140552	2.55637e-08	42140.7
2022-03-21 17:21:16	22144616	9.97245e-09	4.8037e-11	3.37191e-07	1.27183e-10	1.34943e-09	6.46215e-09	9.6074e-15	3.37022e-07	1.2717e-10	0.0191742	2.85067e-08	56893.1
2022-03-21 17:21:39	22167644	1.12397e-08	3.32737e-11	3.32353e-07	9.42021e-11	1.03103e-09	7.28333e-09	6.65474e-15	3.32187e-07	9.41927e-11	0.0219254	2.00331e-08	66003.2
2022-03-21 17:21:59	22187020	1.15152e-08	2.9158e-11	3.28233e-07	9.21811e-11	8.356e-10	7.46185e-09	5.8316e-15	3.28069e-07	9.21719e-11	0.0227448	1.77755e-08	69329.2
2022-03-21 17:22:18	22206396	1.17612e-08	4.70644e-11	3.28322e-07	8.10656e-11	7.12401e-10	7.62126e-09	9.41288e-15	3.28158e-07	8.10575e-11	0.0232244	2.8684e-08	70771.9
2022-03-21 17:22:37	22225772	1.11409e-08	3.7543e-11	3.74995e-07	6.18984e-11	5.6184e-10	7.2193e-09	7.5086e-15	3.74808e-07	6.18922e-11	0.0192614	2.00332e-08	51390
2022-03-21 17:22:59	22247738	5.14066e-09	3.8833e-11	3.08434e-07	2.44454e-11	4.56021e-10	3.33115e-09	7.7666e-15	3.0828e-07	2.4443e-11	0.0108056	2.51933e-08	35051.3
2022-03-21 17:23:21	22269216	2.54047e-09	1.01664e-11	3.13809e-07	5.72759e-11	4.05297e-10	1.64622e-09	2.03328e-15	3.13652e-07	5.72702e-11	0.00524857	6.4826e-09	16733.7
2022-03-21 17:23:42	22290692	1.35354e-09	2.50321e-11	3.37638e-07	2.24674e-11	3.69024e-10	8.77094e-10	5.00642e-15	3.37469e-07	2.24652e-11	0.00259903	1.48352e-08	7701.55
2022-03-21 17:24:11	22319708	6.07567e-10	2.20835e-11	3.57167e-07	4.46124e-11	3.34324e-10	3.93703e-10	4.4167e-15	3.56988e-07	4.46079e-11	0.00110285	1.23721e-08	3089.31
2022-03-21 17:24:39	22347816	3.15909e-10	3.03456e-11	2.09535e-07	5.40724e-12	5.70716e-10	2.04709e-10	6.06912e-15	2.0943e-07	5.4067e-12	0.000977457	2.89792e-08	4667.22
2022-03-21 17:25:07	22375920	1.46737e-10	3.62632e-11	6.63984e-08	1.68774e-11	6.24512e-10	9.50856e-11	7.25264e-15	6.63652e-08	1.68757e-11	0.00143276	1.09284e-07	21589.1
2022-03-21 17:25:37	22405050	7.85608e-11	3.08472e-11	2.41332e-08	2.75092e-11	5.76483e-10	5.09074e-11	6.16944e-15	2.41211e-08	2.75064e-11	0.00211049	2.55769e-07	87495.5
2022-03-21 17:26:05	22433656	5.89959e-11	5.09037e-11	1.16838e-08	1.86834e-11	5.44786e-10	3.82293e-11	1.01807e-14	1.1678e-08	1.86815e-11	0.00327363	8.71791e-07	280326
2022-03-21 17:26:34	22462264	5.73081e-11	3.01307e-11	7.92363e-09	1.85974e-11	4.96672e-10	3.71356e-11	6.02614e-15	7.91967e-09	1.85955e-11	0.00468904	7.60908e-07	592075
2022-03-21 17:27:02	22490870	5.68996e-11	3.66932e-11	6.60099e-09	1.66087e-11	4.66833e-10	3.68709e-11	7.33864e-15	6.59769e-09	1.6607e-11	0.00558846	1.1123e-06	847033
2022-03-21 17:27:34	22522596	3.30024e-11	2.99566e-11	6.17963e-09	-4.64399e-12	4.43629e-10	2.13856e-11	5.99132e-15	6.17654e-09	-4.64353e-12	0.00346238	9.70012e-07	560570
2022-03-21 17:28:05	22553304	3.79259e-11	3.0448e-11	6.03143e-09	-3.89149e-12	4.19379e-10	2.4576e-11	6.0896e-15	6.02841e-09	-3.8911e-12	0.00407669	1.01015e-06	676246
2022-03-21 17:28:36	22584012	4.54186e-11	3.3069e-11	5.90508e-09	6.95523e-12	3.93134e-10	2.94313e-11	6.6138e-15	5.90213e-09	6.95453e-12	0.00498655	1.12058e-06	844873
2022-03-21 17:29:06	22614718	3.29379e-11	2.67009e-11	5.85985e-09	4.97724e-12	3.74383e-10	2.13438e-11	5.34018e-15	5.85692e-09	4.97674e-12	0.0036442	9.11773e-07	622203
2022-03-21 17:29:37	22645424	3.15082e-11	3.3888e-11	5.80477e-09	2.84659e-11	3.71903e-10	2.04173e-11	6.7776e-15	5.80187e-09	2.84631e-11	0.00351909	1.16818e-06	606545
2022-03-21 17:30:08	22676132	3.23037e-11	2.90147e-11	5.75568e-09	2.38004e-11	3.56576e-10	2.09328e-11	5.80294e-15	5.7528e-09	2.3798e-11	0.00363871	1.00872e-06	632511
2022-03-21 17:30:38	22706840	5.04174e-11	3.91709e-11	5.7265e-09	1.21044e-11	3.74514e-10	3.26705e-11	7.83418e-15	5.72364e-09	1.21032e-11	0.00570799	1.36874e-06	997267
2022-03-21 17:31:09	22737546	2.45744e-11	3.22397e-11	5.69644e-09	1.55552e-11	3.49866e-10	1.59242e-11	6.44794e-15	5.69359e-09	1.55536e-11	0.00279687	1.13249e-06	491230
2022-03-21 17:31:40	22768252	2.61762e-11	4.82009e-11	5.66755e-09	-1.13519e-11	3.51939e-10	1.69622e-11	9.64018e-15	5.66472e-09	-1.13508e-11	0.00299436	1.70179e-06	528598
2022-03-21 17:32:10	22798960	4.04629e-11	2.4725e-11	5.65551e-09	-2.92399e-12	3.25579e-10	2.622e-11	4.945e-15	5.65268e-09	-2.9237e-12	0.0046385	8.74806e-07	820584
2022-03-21 17:32:40	22828626	3.12179e-11	3.55568e-11	5.63642e-09	1.59207e-11	3.29971e-10	2.02292e-11	7.11136e-15	5.6336e-09	1.59191e-11	0.00359081	1.26231e-06	637392
2022-03-21 17:33:11	22859336	2.34564e-11	1.69542e-11	5.58908e-09	-6.87998e-12	3.18629e-10	1.51997e-11	3.39084e-15	5.58629e-09	-6.87929e-12	0.0027209	6.06994e-07	487069
2022-03-21 17:33:42	22890040	2.51119e-11	2.4899e-11	5.58924e-09	-1.18572e-11	3.14276e-10	1.62725e-11	4.9798e-15	5.58645e-09	-1.1856e-11	0.00291286	8.91408e-07	521415
2022-03-21 17:34:09	22917498	2.57032e-11	2.56669e-11	5.60449e-09	8.93323e-12	3.12486e-10	1.66557e-11	5.13338e-15	5.60169e-09	8.93234e-12	0.00297333	9.16399e-07	530792
2022-03-21 17:34:40	22948204	4.01619e-11	4.09318e-11	5.5758e-09	3.27874e-12	3.177e-10	2.60249e-11	8.18636e-15	5.57301e-09	3.27841e-12	0.00466981	1.46893e-06	837933
2022-03-21 17:35:07	22975660	3.42924e-11	3.23113e-11	5.58753e-09	3.73239e-11	3.12356e-10	2.22215e-11	6.46226e-15	5.58474e-09	3.73202e-11	0.00397897	1.15713e-06	712472
2022-03-21 17:35:38	23006370	3.16479e-11	2.91375e-11	5.56432e-09	-9.56748e-13	3.06505e-10	2.05078e-11	5.8275e-15	5.56154e-09	-9.56652e-13	0.00368744	1.04782e-06	663025
2022-03-21 17:36:05	23033826	2.86164e-11	2.70899e-11	5.53954e-09	4.89124e-12	3.01406e-10	1.85434e-11	5.41798e-15	5.53677e-09	4.89075e-12	0.00334914	9.78545e-07	604891
2022-03-21 17:36:36	23064532	1.48672e-11	3.89661e-11	5.54163e-09	-1.22442e-11	3.1029e-10	9.63395e-12	7.79322e-15	5.53886e-09	-1.2243e-11	0.00173934	1.40701e-06	314025
2022-03-21 17:37:07	23095240	2.09302e-11	4.34606e-11	5.55914e-09	3.63994e-11	3.01974e-10	1.35628e-11	8.69212e-15	5.55636e-09	3.63958e-11	0.00244094	1.56435e-06	439306
2022-03-21 17:37:34	23122696	2.06184e-11	3.94063e-11	6.16136e-09	8.77198e-12	3.13684e-10	1.33607e-11	7.88126e-15	6.15828e-09	8.7711e-12	0.00216955	1.27978e-06	352299
2022-03-21 17:38:05	23153404	2.05109e-11	3.39699e-11	5.1191e-09	1.53832e-11	2.99095e-10	1.32911e-11	6.79398e-15	5.11654e-09	1.53817e-11	0.00259767	1.32785e-06	507700
2022-03-21 17:38:36	23184112	2.96699e-11	3.52701e-11	5.42695e-09	-1.77374e-11	2.99279e-10	1.92261e-11	7.05402e-15	5.42424e-09	-1.77356e-11	0.00354448	1.30046e-06	653452
2022-03-21 17:39:06	23214818	1.22012e-11	3.28642e-11	7.61253e-09	6.55749e-13	3.17001e-10	7.90638e-12	6.57284e-15	7.60872e-09	6.55683e-13	0.00103912	8.63856e-07	136570
2022-03-21 17:39:37	23245524	1.54584e-11	2.66599e-11	2.25391e-07	4.09574e-12	2.97789e-10	1.0017e-11	5.33198e-15	2.25278e-07	4.09533e-12	4.44652e-05	2.36684e-08	197.379
2022-03-21 17:40:09	23277772	1.47597e-11	1.36269e-11	3.21513e-07	-1.23947e-11	2.71314e-10	9.56429e-12	2.72538e-15	3.21352e-07	-1.23935e-11	2.97626e-05	8.48097e-09	92.6168
2022-03-21 17:40:37	23305880	1.55229e-11	2.59023e-11	3.61378e-07	1.53832e-11	2.58406e-10	1.00588e-11	5.18046e-15	3.61197e-07	1.53817e-11	2.78486e-05	1.43425e-08	77.1008
2022-03-21 17:41:05	23333988	1.14702e-11	3.40928e-11	3.65051e-07	1.04274e-11	3.12986e-10	7.43269e-12	6.81856e-15	3.64868e-07	1.04264e-11	2.03709e-05	1.86877e-08	55.8307
2022-03-21 17:41:34	23362096	2.61001e-09	2.79397e-11	3.51255e-07	8.79563e-11	1.50531e-09	1.69129e-09	5.58794e-15	3.51079e-07	8.79475e-11	0.00481739	1.59165e-08	13721.7
2022-03-21 17:42:07	23395532	8.94428e-09	3.44715e-11	3.35847e-07	1.21689e-10	1.46778e-09	5.79589e-09	6.8943e-15	3.35679e-07	1.21677e-10	0.0172662	2.05384e-08	51436.6
2022-03-21 17:42:30	23418560	1.07439e-08	3.61506e-11	3.34234e-07	9.9749e-11	1.14553e-09	6.96205e-09	7.23012e-15	3.34067e-07	9.9739e-11	0.0208403	2.16427e-08	62383.6
2022-03-21 17:42:49	23437936	1.13224e-08	2.49707e-11	3.29218e-07	1.01813e-10	9.11236e-10	7.33692e-09	4.99414e-15	3.29053e-07	1.01803e-10	0.022297	1.51773e-08	67761.1
2022-03-21 17:43:09	23457312	1.16758e-08	4.4167e-11	3.27605e-07	1.05435e-10	7.67157e-10	7.56592e-09	8.8334e-15	3.27441e-07	1.05424e-10	0.0231062	2.69771e-08	70565.9
2022-03-21 17:43:28	23476688	1.19231e-08	5.47328e-11	3.30024e-07	6.31561e-11	6.49659e-10	7.72617e-09	1.09466e-14	3.29859e-07	6.31498e-11	0.0234226	3.31856e-08	71008
2022-03-21 17:43:50	23498656	7.73791e-09	3.18711e-11	1.77733e-07	3.60124e-11	4.03554e-10	5.01417e-09	6.37422e-15	1.77644e-07	3.60088e-11	0.0282259	3.5882e-08	158890
2022-03-21 17:44:12	23520132	1.82865e-09	4.53137e-11	1.26581e-07	7.12723e-12	3.85609e-10	1.18497e-09	9.06274e-15	1.26518e-07	7.12652e-12	0.009366	7.16322e-08	74029.2
2022-03-21 17:44:33	23541608	1.29928e-09	4.35323e-11	1.27297e-07	4.35159e-11	3.72287e-10	8.41933e-10	8.70646e-15	1.27233e-07	4.35115e-11	0.00661724	6.84291e-08	52008.7
2022-03-21 17:44:55	23563084	9.55867e-10	3.40723e-11	1.28014e-07	-1.14379e-11	3.55624e-10	6.19402e-10	6.81446e-15	1.2795e-07	-1.14368e-11	0.00484097	5.32588e-08	37834.8
2022-03-21 17:45:24	23592100	6.83344e-10	3.72358e-11	1.31149e-07	2.18547e-11	3.48345e-10	4.42807e-10	7.44716e-15	1.31083e-07	2.18525e-11	0.00337805	5.68124e-08	25770.3
2022-03-21 17:45:52	23620208	4.95875e-10	4.25391e-11	1.34195e-07	1.49854e-11	3.46909e-10	3.21327e-10	8.50782e-15	1.34128e-07	1.49839e-11	0.00239568	6.34306e-08	17861.1
2022-03-21 17:46:20	23648316	3.668e-10	2.27899e-11	1.40377e-07	1.09219e-11	3.34017e-10	2.37686e-10	4.55798e-15	1.40307e-07	1.09208e-11	0.00169405	3.24858e-08	12073.9
2022-03-21 17:46:48	23676420	2.78499e-10	2.78475e-11	1.47722e-07	5.24599e-12	3.15849e-10	1.80467e-10	5.5695e-15	1.47648e-07	5.24547e-12	0.00122228	3.77214e-08	8278.33
2022-03-21 17:47:16	23704528	2.26168e-10	1.85104e-11	1.49873e-07	3.13254e-11	3.21279e-10	1.46557e-10	3.70208e-15	1.49798e-07	3.13223e-11	0.000978363	2.47138e-08	6531.21
2022-03-21 17:47:44	23732636	1.87458e-10	2.28616e-11	1.53635e-07	2.65417e-11	3.04923e-10	1.21473e-10	4.57232e-15	1.53558e-07	2.6539e-11	0.000791054	2.97758e-08	5151.49
2022-03-21 17:48:12	23760742	1.30633e-10	4.5631e-11	1.53008e-07	1.27817e-11	3.47939e-10	8.46502e-11	9.1262e-15	1.52931e-07	1.27804e-11	0.000553517	5.96751e-08	3619.38
2022-03-21 17:48:40	23788850	1.77976e-10	2.4254e-11	1.56323e-07	2.85197e-11	3.92113e-10	1.15328e-10	4.8508e-15	1.56245e-07	2.85168e-11	0.000738126	3.10461e-08	4724.17
2022-03-21 17:49:08	23816956	2.79091e-10	3.05709e-11	1.59548e-07	4.49779e-11	3.88112e-10	1.80851e-10	6.11418e-15	1.59468e-07	4.49734e-11	0.00113409	3.83411e-08	7111.68
2022-03-21 17:49:37	23845060	2.96602e-10	3.34887e-11	1.60712e-07	2.01777e-11	3.60631e-10	1.92198e-10	6.69774e-15	1.60632e-07	2.01757e-11	0.00119651	4.16963e-08	7448.81
2022-03-21 17:50:05	23873168	2.8983e-10	2.61583e-11	1.63668e-07	4.68161e-11	3.31015e-10	1.8781e-10	5.23166e-15	1.63586e-07	4.68114e-11	0.00114808	3.19811e-08	7018.19
2022-03-21 17:50:33	23901276	2.40853e-10	4.0041e-11	1.65102e-07	1.60604e-11	3.31084e-10	1.56073e-10	8.0082e-15	1.65019e-07	1.60588e-11	0.000945784	4.85288e-08	5731.35
2022-03-21 17:51:01	23929380	2.51431e-10	2.26978e-11	1.66982e-07	1.79739e-11	3.05637e-10	1.62927e-10	4.53956e-15	1.66899e-07	1.79721e-11	0.000976206	2.71995e-08	5849.1
2022-03-21 17:51:29	23957490	2.17386e-10	3.42053e-11	1.68953e-07	1.77374e-11	3.05553e-10	1.40866e-10	6.84106e-15	1.68869e-07	1.77356e-11	0.000834176	4.05112e-08	4939.8
2022-03-21 17:51:57	23985596	2.16149e-10	2.8687e-11	1.63131e-07	4.51821e-11	2.78616e-10	1.40065e-10	5.7374e-15	1.63049e-07	4.51776e-11	0.000859031	3.51881e-08	5268.53
2022-03-21 17:52:25	24013704	1.92779e-10	2.21347e-11	1.66624e-07	3.52599e-11	2.73664e-10	1.24921e-10	4.42694e-15	1.66541e-07	3.52564e-11	0.000750092	2.65817e-08	4503.95
2022-03-21 17:52:50	24038560	1.49919e-10	3.93449e-11	1.69223e-07	1.00404e-11	2.72634e-10	9.71475e-11	7.86898e-15	1.69138e-07	1.00394e-11	0.000574367	4.65239e-08	3395.84
2022-03-21 17:53:18	24066668	1.47339e-10	3.18302e-11	1.68327e-07	2.27147e-11	2.60111e-10	9.54757e-11	6.36604e-15	1.68243e-07	2.27124e-11	0.000567487	3.78384e-08	3373.03
2022-03-21 17:53:46	24094776	1.54348e-10	2.45509e-11	1.6537e-07	4.94821e-11	2.48824e-10	1.00018e-10	4.91018e-15	1.65287e-07	4.94772e-11	0.000605113	2.97069e-08	3660.98
2022-03-21 17:54:14	24122880	1.37847e-10	2.05785e-11	1.70298e-07	1.73397e-11	2.47541e-10	8.93249e-11	4.1157e-15	1.70213e-07	1.7338e-11	0.000524783	2.41797e-08	3083.1
2022-03-21 17:54:42	24150986	1.42931e-10	4.57949e-11	1.66803e-07	2.50797e-11	2.50651e-10	9.26193e-11	9.15898e-15	1.6672e-07	2.50772e-11	0.000555539	5.49364e-08	3332.18
2022-03-21 17:55:11	24179092	1.34589e-10	3.13591e-11	1.70745e-07	1.09864e-11	2.54659e-10	8.72137e-11	6.27182e-15	1.7066e-07	1.09853e-11	0.000511039	3.67505e-08	2994.49
2022-03-21 17:55:35	24203950	1.24656e-10	2.06911e-11	1.76478e-07	1.78234e-11	2.47264e-10	8.07771e-11	4.13822e-15	1.7639e-07	1.78216e-11	0.000457947	2.34607e-08	2596.22
2022-03-21 17:56:04	24232056	1.15454e-10	3.3417e-11	1.71014e-07	2.68749e-12	2.51111e-10	7.48142e-11	6.6834e-15	1.70928e-07	2.68722e-12	0.000437693	3.91006e-08	2560.68
2022-03-21 17:56:32	24260164	1.13734e-10	3.73791e-11	1.69043e-07	9.58898e-12	2.50298e-10	7.36996e-11	7.47582e-15	1.68958e-07	9.58802e-12	0.0004362	4.42465e-08	2581.7
2022-03-21 17:57:00	24288270	9.83085e-11	4.20682e-11	1.7182e-07	1.05349e-11	2.60748e-10	6.37039e-11	8.41364e-15	1.71734e-07	1.05338e-11	0.000370945	4.89923e-08	2160
2022-03-21 17:57:28	24316376	1.12337e-10	2.63221e-11	1.67878e-07	8.26673e-12	2.38204e-10	7.27944e-11	5.26442e-15	1.67794e-07	8.2659e-12	0.000433832	3.13743e-08	2585.5
2022-03-21 17:57:56	24344484	1.08209e-10	2.09061e-11	1.66893e-07	1.50177e-11	2.38664e-10	7.01194e-11	4.18122e-15	1.6681e-07	1.50162e-11	0.000420356	2.50658e-08	2519.98
2022-03-21 17:58:24	24372592	9.93083e-11	3.32737e-11	1.68595e-07	-4.71924e-12	2.39594e-10	6.43518e-11	6.65474e-15	1.68511e-07	-4.71877e-12	0.000381885	3.94915e-08	2266.24
2022-03-21 17:58:52	24400698	1.11273e-10	3.50961e-11	1.80062e-07	1.21474e-11	2.39471e-10	7.21049e-11	7.01922e-15	1.79972e-07	1.21462e-11	0.000400645	3.90017e-08	2226.15
2022-03-21 17:59:20	24428804	1.0206e-10	2.09061e-11	1.74777e-07	1.85437e-11	2.38051e-10	6.61349e-11	4.18122e-15	1.7469e-07	1.85418e-11	0.000378585	2.39351e-08	2167.19
2022-03-21 17:59:48	24456912	9.95448e-11	3.41337e-11	1.75852e-07	6.11674e-12	2.41145e-10	6.4505e-11	6.82674e-15	1.75764e-07	6.11613e-12	0.000366998	3.88404e-08	2088.01
2022-03-21 18:00:17	24485020	1.16368e-10	2.32813e-11	1.75941e-07	2.53484e-11	2.3878e-10	7.54065e-11	4.65626e-15	1.75853e-07	2.53459e-11	0.000428804	2.64781e-08	2438.42
2022-03-21 18:00:45	24513126	9.52878e-11	3.03661e-11	1.7191e-07	2.92937e-11	2.40108e-10	6.17465e-11	6.07322e-15	1.71824e-07	2.92908e-11	0.000359359	3.53456e-08	2091.44
2022-03-21 18:01:13	24541232	1.01716e-10	2.28002e-11	1.74956e-07	3.11749e-11	2.39164e-10	6.5912e-11	4.56004e-15	1.74869e-07	3.11718e-11	0.000376923	2.6077e-08	2155.47
2022-03-21 18:01:41	24569340	8.75371e-11	2.10392e-11	1.73522e-07	7.79373e-12	2.28222e-10	5.6724e-11	4.20784e-15	1.73435e-07	7.79295e-12	0.000327062	2.42617e-08	1885.79
2022-03-21 18:02:06	24594196	9.27293e-11	3.30996e-11	1.71552e-07	2.33274e-11	2.362e-10	6.00886e-11	6.61992e-15	1.71466e-07	2.33251e-11	0.00035044	3.86077e-08	2043.78
2022-03-21 18:02:31	24619052	8.76553e-11	3.11647e-11	1.7191e-07	2.34457e-11	2.43134e-10	5.68006e-11	6.23294e-15	1.71824e-07	2.34434e-11	0.000330574	3.62751e-08	1923.91
2022-03-21 18:02:59	24647160	9.49223e-11	3.41951e-11	1.74149e-07	2.22094e-11	2.4298e-10	6.15097e-11	6.83902e-15	1.74062e-07	2.22072e-11	0.000353378	3.92907e-08	2030.19
2022-03-21 18:03:27	24675266	9.01063e-11	1.66266e-11	1.70924e-07	1.78019e-11	2.24014e-10	5.83889e-11	3.32532e-15	1.70839e-07	1.78001e-11	0.000341778	1.94647e-08	2000.59
2022-03-21 18:03:55	24703372	9.7599e-11	2.54518e-11	1.6976e-07	4.12799e-12	2.45114e-10	6.32442e-11	5.09036e-15	1.69675e-07	4.12758e-12	0.000372737	3.00006e-08	2196.77
2022-03-21 18:04:23	24731480	9.07728e-11	3.09702e-11	1.68595e-07	6.78323e-12	2.45138e-10	5.88208e-11	6.19404e-15	1.68511e-07	6.78255e-12	0.000349063	3.67575e-08	2071.46
2022-03-21 18:04:51	24759588	7.90876e-11	4.16382e-11	1.71372e-07	1.85329e-11	2.37728e-10	5.12488e-11	8.32764e-15	1.71286e-07	1.8531e-11	0.000299199	4.86182e-08	1746.78
2022-03-21 18:05:19	24787696	7.78621e-11	2.84107e-11	1.7397e-07	9.19123e-12	2.36952e-10	5.04546e-11	5.68214e-15	1.73883e-07	9.19031e-12	0.000290164	3.26779e-08	1668.73
2022-03-21 18:05:47	24815800	8.11623e-11	2.95983e-11	1.70656e-07	5.37499e-12	2.32983e-10	5.25932e-11	5.91966e-15	1.70571e-07	5.37445e-12	0.000308337	3.4705e-08	1807.68
2022-03-21 18:06:15	24843908	8.42906e-11	2.99873e-11	1.70298e-07	-2.71974e-12	2.42857e-10	5.46203e-11	5.99746e-15	1.70213e-07	-2.71947e-12	0.000320894	3.52351e-08	1885.25
2022-03-21 18:06:44	24872016	6.92513e-11	2.83697e-11	1.62683e-07	3.64424e-12	2.38265e-10	4.48748e-11	5.67394e-15	1.62602e-07	3.64388e-12	0.00027598	3.48947e-08	1697.28
2022-03-21 18:07:12	24900122	8.10441e-11	2.98542e-11	1.68595e-07	2.25104e-11	2.34288e-10	5.25166e-11	5.97084e-15	1.68511e-07	2.25081e-11	0.000311651	3.5433e-08	1849.45
2022-03-21 18:07:40	24928230	5.94044e-11	1.9227e-11	1.70566e-07	1.47167e-11	2.35885e-10	3.84941e-11	3.8454e-15	1.70481e-07	1.47152e-11	0.000225797	2.25562e-08	1324.47
2022-03-21 18:08:08	24956336	7.30138e-11	3.06732e-11	1.68058e-07	2.04142e-11	2.276e-10	4.73129e-11	6.13464e-15	1.67974e-07	2.04122e-11	0.000281668	3.65214e-08	1676.86
2022-03-21 18:08:33	24981192	6.05224e-11	3.2168e-11	1.69312e-07	1.81244e-11	2.42972e-10	3.92185e-11	6.4336e-15	1.69227e-07	1.81226e-11	0.00023175	3.80175e-08	1369.46
2022-03-21 18:09:01	25009300	7.30568e-11	3.22397e-11	1.64743e-07	1.11154e-11	2.46036e-10	4.73408e-11	6.44794e-15	1.64661e-07	1.11143e-11	0.000287505	3.9159e-08	1746.05
2022-03-21 18:09:29	25037406	8.64191e-11	2.56156e-11	1.71282e-07	2.22739e-11	2.38818e-10	5.59996e-11	5.12312e-15	1.71196e-07	2.22717e-11	0.000327107	2.99254e-08	1910.71
2022-03-21 18:09:57	25065512	8.10978e-11	2.8165e-11	1.63937e-07	-5.72974e-12	2.32322e-10	5.25514e-11	5.633e-15	1.63855e-07	-5.72917e-12	0.000320719	3.43779e-08	1957.33
2022-03-21 18:10:25	25093620	7.92166e-11	3.02945e-11	1.68595e-07	2.97022e-11	2.51288e-10	5.13324e-11	6.0589e-15	1.68511e-07	2.96992e-11	0.000304624	3.59556e-08	1807.74
2022-03-21 18:10:53	25121728	7.29063e-11	3.39801e-11	1.67162e-07	-8.87948e-12	2.40722e-10	4.72433e-11	6.79602e-15	1.67078e-07	-8.87859e-12	0.000282761	4.06756e-08	1692.39
2022-03-21 18:11:21	25149836	8.26351e-11	2.69159e-11	1.6976e-07	2.62837e-11	2.44546e-10	5.35475e-11	5.38318e-15	1.69675e-07	2.62811e-11	0.000315589	3.17264e-08	1859.96
2022-03-21 18:11:49	25177940	9.23853e-11	3.76761e-11	1.68147e-07	1.33084e-11	2.41582e-10	5.98657e-11	7.53522e-15	1.68063e-07	1.33071e-11	0.00035621	4.48357e-08	2119.5
2022-03-21 18:12:18	25206048	6.57683e-11	2.65575e-11	1.63758e-07	-7.22398e-12	2.42059e-10	4.26179e-11	5.3115e-15	1.63676e-07	-7.22326e-12	0.000260379	3.24513e-08	1590.82
2022-03-21 18:12:46	25234156	7.84856e-11	2.86051e-11	1.63668e-07	2.68427e-11	2.39294e-10	5.08587e-11	5.72102e-15	1.63586e-07	2.684e-11	0.000310898	3.49725e-08	1900.52
2022-03-21 18:13:14	25262260	7.09283e-11	2.16228e-11	1.68416e-07	2.18224e-12	2.32898e-10	4.59615e-11	4.32456e-15	1.68332e-07	2.18202e-12	0.000273041	2.56907e-08	1622.04
2022-03-21 18:13:42	25290370	9.26541e-11	3.27515e-11	1.64743e-07	3.76249e-12	2.38089e-10	6.00399e-11	6.5503e-15	1.64661e-07	3.76211e-12	0.000364628	3.97806e-08	2214.42
2022-03-21 18:14:10	25318476	6.42848e-11	4.17918e-11	1.64743e-07	1.91994e-11	2.3534e-10	4.16566e-11	8.35836e-15	1.64661e-07	1.91975e-11	0.000252984	5.07611e-08	1536.4
2022-03-21 18:14:38	25346584	7.88941e-11	2.82161e-11	1.63489e-07	5.02024e-12	2.38573e-10	5.11234e-11	5.64322e-15	1.63407e-07	5.01974e-12	0.000312859	3.45347e-08	1914.59
2022-03-21 18:15:06	25374690	6.56823e-11	2.06297e-11	1.64385e-07	6.23499e-12	2.33036e-10	4.25621e-11	4.12594e-15	1.64303e-07	6.23437e-12	0.000259047	2.51118e-08	1576.64
2022-03-21 18:15:34	25402796	6.78216e-11	2.07423e-11	1.64564e-07	3.73776e-11	2.37251e-10	4.39484e-11	4.14846e-15	1.64482e-07	3.73739e-11	0.000267193	2.52214e-08	1624.46
2022-03-21 18:16:02	25430904	6.55856e-11	1.41694e-11	1.64116e-07	1.62109e-11	2.29159e-10	4.24995e-11	2.83388e-15	1.64034e-07	1.62093e-11	0.000259089	1.72762e-08	1579.49
2022-03-21 18:16:31	25459012	8.32586e-11	2.9158e-11	1.66087e-07	2.65202e-11	2.46128e-10	5.39516e-11	5.8316e-15	1.66004e-07	2.65175e-11	0.000325002	3.51293e-08	1957.8
2022-03-21 18:16:59	25487118	6.11674e-11	2.46328e-11	1.66356e-07	2.68964e-11	2.3299e-10	3.96365e-11	4.92656e-15	1.66273e-07	2.68937e-11	0.000238382	2.96294e-08	1433.68
2022-03-21 18:17:27	25515224	7.89371e-11	2.79192e-11	1.64116e-07	7.51423e-12	2.30633e-10	5.11512e-11	5.58384e-15	1.64034e-07	7.51348e-12	0.000311833	3.40408e-08	1901.03
2022-03-21 18:17:55	25543332	6.99823e-11	3.3673e-11	1.66356e-07	3.73561e-11	2.4523e-10	4.53485e-11	6.7346e-15	1.66273e-07	3.73524e-11	0.000272736	4.05033e-08	1640.29
2022-03-21 18:18:23	25571440	7.05306e-11	3.86487e-11	1.62414e-07	1.37277e-11	2.44761e-10	4.57038e-11	7.72974e-15	1.62333e-07	1.37263e-11	0.000281544	4.76166e-08	1734.36
2022-03-21 18:18:51	25599546	6.38226e-11	4.92553e-11	1.59995e-07	2.50474e-12	2.49146e-10	4.1357e-11	9.85106e-15	1.59915e-07	2.50449e-12	0.000258619	6.16019e-08	1617.23

## Sheet: Conc vector
Real time	ms	Ethylene mbar	Carbon monoxide mbar	Argon mbar	Ethylene oxide mbar	Carbon dioxide mbar	Corrected Et	Corrected CO	Corrected Ar	Corrected EO	Corrected CO2	ć(Et)	ć (CO)	ć (EtO)
2022-03-21 11:12:26	14788	2.69717e-11	3.81982e-11	5.88332e-09	-2.22847e-11	2.89711e-10	1.74777e-11	7.63964e-15	5.88038e-09	-2.22825e-11	9.69663e-11	0.0029722	1.29917e-06	505444
2022-03-21 11:13:16	64281	2.09517e-11	5.22449e-11	5.53512e-08	9.27723e-12	4.26843e-10	1.35767e-11	1.0449e-14	5.53235e-08	9.2763e-12	1.42864e-10	0.000245406	1.8887e-07	4435.83
2022-03-21 11:13:44	92759	4.58594e-11	4.53547e-11	2.62031e-07	2.35854e-11	3.18967e-10	2.97169e-11	9.07094e-15	2.619e-07	2.3583e-11	1.06758e-10	0.000113467	3.46351e-08	433.244
2022-03-21 11:14:13	121886	2.47357e-11	2.82469e-11	3.38803e-07	1.27709e-11	2.66039e-10	1.60287e-11	5.64938e-15	3.38634e-07	1.27696e-11	8.90433e-11	4.73336e-05	1.66829e-08	139.778
2022-03-21 11:14:38	146742	3.52276e-11	2.85028e-11	3.7383e-07	3.65821e-11	2.42834e-10	2.28275e-11	5.70056e-15	3.73643e-07	3.65784e-11	8.12765e-11	6.10944e-05	1.52567e-08	163.51
2022-03-21 11:15:06	174850	7.86898e-12	2.47556e-11	3.74458e-07	4.02801e-11	8.17443e-10	5.0991e-12	4.95112e-15	3.74271e-07	4.02761e-11	2.73598e-10	1.36241e-05	1.32287e-08	36.4017
2022-03-21 11:15:41	209838	1.10127e-08	3.38982e-11	3.35758e-07	1.89608e-10	4.65012e-09	7.13623e-09	6.77964e-15	3.3559e-07	1.89589e-10	1.5564e-09	0.0212647	2.02021e-08	63365.2
2022-03-21 11:16:02	230255	1.144e-08	4.2959e-11	3.56899e-07	1.93768e-10	4.6112e-09	7.41312e-09	8.5918e-15	3.56721e-07	1.93749e-10	1.54337e-09	0.0207813	2.40855e-08	58256.6
2022-03-21 11:16:19	247421	1.20513e-08	5.26134e-11	3.66216e-07	1.84899e-10	3.91668e-09	7.80924e-09	1.05227e-14	3.66033e-07	1.84881e-10	1.31091e-09	0.0213348	2.87479e-08	58286.6
2022-03-21 11:16:36	264586	1.27905e-08	4.34913e-11	3.66753e-07	1.94843e-10	3.0884e-09	8.28824e-09	8.69826e-15	3.6657e-07	1.94824e-10	1.03369e-09	0.0226103	2.37288e-08	61680.7
2022-03-21 11:16:53	281753	1.29295e-08	5.22142e-11	3.65051e-07	1.72612e-10	2.44105e-09	8.37832e-09	1.04428e-14	3.64868e-07	1.72595e-10	8.17019e-10	0.0229626	2.86208e-08	62933.8
2022-03-21 11:17:10	298919	1.31929e-08	4.62249e-11	3.63349e-07	1.713e-10	1.97306e-09	8.549e-09	9.24498e-15	3.63167e-07	1.71283e-10	6.60383e-10	0.0235401	2.54565e-08	64818.9
2022-03-21 11:17:28	316085	1.35106e-08	5.45587e-11	3.67022e-07	1.47812e-10	1.55151e-09	8.75487e-09	1.09117e-14	3.66838e-07	1.47797e-10	5.1929e-10	0.0238657	2.97454e-08	65057.9
2022-03-21 11:17:45	333251	1.04489e-08	4.31534e-11	3.42118e-07	8.84401e-11	1.06934e-09	6.77089e-09	8.63068e-15	3.41947e-07	8.84313e-11	3.57908e-10	0.019801	2.52398e-08	57906.6
2022-03-21 11:18:05	353007	4.65182e-09	3.98772e-11	3.30651e-07	6.18124e-11	8.154e-10	3.01438e-09	7.97544e-15	3.30486e-07	6.18062e-11	2.72914e-10	0.00912106	2.41325e-08	27599
2022-03-21 11:18:24	372274	2.48313e-09	4.55799e-11	3.35578e-07	3.23144e-11	6.64717e-10	1.60907e-09	9.11598e-15	3.3541e-07	3.23112e-11	2.22481e-10	0.00479731	2.71786e-08	14302.8
2022-03-21 11:18:43	391540	1.41651e-09	3.47275e-11	3.52241e-07	2.51442e-11	5.70117e-10	9.17898e-10	6.9455e-15	3.52065e-07	2.51417e-11	1.90818e-10	0.00260719	1.97279e-08	7405.41
2022-03-21 11:19:13	421598	6.11405e-10	3.81982e-11	3.62991e-07	1.59099e-11	4.82874e-10	3.9619e-10	7.63964e-15	3.6281e-07	1.59083e-11	1.61618e-10	0.00109201	2.10569e-08	3009.86
2022-03-21 11:19:41	449705	2.8424e-10	3.69287e-11	1.96903e-07	-3.26799e-12	7.19471e-10	1.84188e-10	7.38574e-15	1.96805e-07	-3.26766e-12	2.40807e-10	0.000935891	3.75283e-08	4755.43
2022-03-21 11:20:09	477811	1.17819e-10	3.10521e-11	6.33588e-08	-2.14677e-11	7.40436e-10	7.63467e-11	6.21042e-15	6.33271e-08	-2.14656e-11	2.47824e-10	0.00120559	9.80689e-08	19037.5
2022-03-21 11:20:38	506940	7.01758e-11	4.39213e-11	2.35245e-08	-1.61572e-11	6.88736e-10	4.54739e-11	8.78426e-15	2.35127e-08	-1.61556e-11	2.3052e-10	0.00193401	3.73596e-07	82253.8
2022-03-21 11:21:07	535546	4.41286e-11	3.82904e-11	1.1423e-08	4.55799e-12	6.28466e-10	2.85953e-11	7.65808e-15	1.14173e-08	4.55753e-12	2.10348e-10	0.00250456	6.70744e-07	219366
2022-03-21 11:21:36	564153	3.87859e-11	3.34477e-11	7.77018e-09	4.89124e-12	5.83348e-10	2.51333e-11	6.68954e-15	7.76629e-09	4.89075e-12	1.95247e-10	0.0032362	8.61355e-07	416698
2022-03-21 11:22:04	592760	4.42039e-11	3.9908e-11	6.46342e-09	3.13899e-12	5.30749e-10	2.86441e-11	7.9816e-15	6.46019e-09	3.13868e-12	1.77642e-10	0.00443395	1.23551e-06	686349
2022-03-21 11:22:36	624487	2.70039e-11	3.20247e-11	6.04475e-09	-2.12849e-12	4.94376e-10	1.74985e-11	6.40494e-15	6.04173e-09	-2.12828e-12	1.65468e-10	0.00289628	1.06012e-06	479379
2022-03-21 11:23:07	655195	4.09251e-11	3.78501e-11	5.84396e-09	9.83623e-12	4.75349e-10	2.65195e-11	7.57002e-15	5.84104e-09	9.83525e-12	1.59099e-10	0.0045402	1.29601e-06	777293
2022-03-21 11:23:37	685901	3.10997e-11	3.98158e-11	5.74875e-09	1.90167e-11	4.49671e-10	2.01526e-11	7.96316e-15	5.74588e-09	1.90148e-11	1.50505e-10	0.00350732	1.38589e-06	610406
2022-03-21 11:24:08	716608	2.27577e-11	3.1349e-11	5.67954e-09	-2.05217e-11	4.23388e-10	1.4747e-11	6.2698e-15	5.6767e-09	-2.05196e-11	1.41708e-10	0.00259781	1.10448e-06	457627
2022-03-21 11:24:39	747315	1.78234e-11	4.50577e-11	5.64882e-09	-5.11699e-12	4.19725e-10	1.15496e-11	9.01154e-15	5.646e-09	-5.11648e-12	1.40482e-10	0.00204562	1.59609e-06	362313
2022-03-21 11:25:10	778021	2.02852e-11	3.79218e-11	5.59708e-09	-1.14057e-11	4.04222e-10	1.31448e-11	7.58436e-15	5.59428e-09	-1.14046e-11	1.35293e-10	0.00234969	1.35573e-06	420016
2022-03-21 11:25:40	808730	3.95276e-11	3.9478e-11	5.5825e-09	2.16289e-11	3.73569e-10	2.56139e-11	7.8956e-15	5.57971e-09	2.16267e-11	1.25034e-10	0.00459054	1.41506e-06	822721
2022-03-21 11:26:11	839436	3.06804e-11	4.10853e-11	5.53057e-09	-1.54262e-11	3.75673e-10	1.98809e-11	8.21706e-15	5.5278e-09	-1.54247e-11	1.25738e-10	0.00359653	1.4865e-06	650625
2022-03-21 11:26:42	870143	5.26749e-12	3.81675e-11	5.52719e-09	-1.92209e-11	3.76717e-10	3.41333e-12	7.6335e-15	5.52443e-09	-1.9219e-11	1.26087e-10	0.000617862	1.38177e-06	111842
2022-03-21 11:27:12	900850	1.46522e-11	3.5997e-11	5.52009e-09	7.04123e-12	3.58542e-10	9.49463e-12	7.1994e-15	5.51733e-09	7.04053e-12	1.20004e-10	0.00172087	1.30487e-06	311903
2022-03-21 11:27:43	931557	3.35721e-11	3.75839e-11	5.50794e-09	2.25319e-11	3.4747e-10	2.17547e-11	7.51678e-15	5.50519e-09	2.25296e-11	1.16298e-10	0.00395168	1.3654e-06	717810
2022-03-21 11:28:14	962265	3.91191e-11	4.21194e-11	5.48433e-09	-2.57569e-11	3.45558e-10	2.53492e-11	8.42388e-15	5.48159e-09	-2.57543e-11	1.15658e-10	0.00462442	1.53676e-06	843628
2022-03-21 11:28:44	992971	2.24997e-11	3.36013e-11	5.46203e-09	-2.30157e-11	3.45082e-10	1.45798e-11	6.72026e-15	5.4593e-09	-2.30134e-11	1.15499e-10	0.00267064	1.23097e-06	489190
2022-03-21 11:29:15	1023678	2.34349e-11	3.22704e-11	5.48761e-09	-1.55337e-11	3.46264e-10	1.51858e-11	6.45408e-15	5.48487e-09	-1.55321e-11	1.15895e-10	0.00276868	1.17671e-06	504785
2022-03-21 11:29:46	1054385	2.52194e-11	3.98466e-11	5.47226e-09	-3.31206e-11	3.41803e-10	1.63422e-11	7.96932e-15	5.46952e-09	-3.31173e-11	1.14401e-10	0.00298786	1.45704e-06	546274
2022-03-21 11:30:17	1085092	2.34457e-11	3.71539e-11	5.43621e-09	-1.36309e-11	3.33649e-10	1.51928e-11	7.43078e-15	5.43349e-09	-1.36295e-11	1.11672e-10	0.00279614	1.36759e-06	514612
2022-03-21 11:30:47	1115800	3.36044e-11	3.97339e-11	5.47328e-09	1.97477e-11	3.39008e-10	2.17757e-11	7.94678e-15	5.47054e-09	1.97457e-11	1.13466e-10	0.00398053	1.45265e-06	727629
2022-03-21 11:31:18	1146506	2.08764e-11	4.2099e-11	5.42593e-09	-3.74206e-11	3.36927e-10	1.35279e-11	8.4198e-15	5.42322e-09	-3.74169e-11	1.12769e-10	0.00249444	1.55255e-06	459956
2022-03-21 11:31:49	1177213	2.57462e-11	3.75225e-11	5.42123e-09	-7.55723e-12	3.27682e-10	1.66835e-11	7.5045e-15	5.41852e-09	-7.55647e-12	1.09675e-10	0.00307898	1.38497e-06	568234
2022-03-21 11:32:19	1207920	2.44239e-11	4.12287e-11	5.44925e-09	4.68699e-12	3.28174e-10	1.58267e-11	8.24574e-15	5.44653e-09	4.68652e-12	1.0984e-10	0.00290583	1.51395e-06	533520
2022-03-21 11:32:50	1238627	2.22202e-11	3.87204e-11	5.11377e-09	1.22334e-11	3.22176e-10	1.43987e-11	7.74408e-15	5.11121e-09	1.22322e-11	1.07832e-10	0.00281708	1.51512e-06	551157
2022-03-21 11:33:21	1269335	2.57569e-11	2.91785e-11	5.17072e-09	7.62173e-12	3.28896e-10	1.66905e-11	5.8357e-15	5.16813e-09	7.62097e-12	1.10081e-10	0.0032295	1.12917e-06	624886
2022-03-21 11:33:52	1300041	2.97344e-11	3.15537e-11	5.42135e-09	1.61572e-11	3.23206e-10	1.92679e-11	6.31074e-15	5.41864e-09	1.61556e-11	1.08177e-10	0.00355585	1.16464e-06	656226
2022-03-21 11:34:22	1330748	3.56684e-11	5.70875e-11	1.00333e-07	-1.93607e-11	3.85417e-10	2.31131e-11	1.14175e-14	1.00283e-07	-1.93588e-11	1.28999e-10	0.000230479	1.13853e-07	2298.29
2022-03-21 11:34:54	1362996	3.35399e-11	3.20349e-11	2.79409e-07	-1.39212e-11	3.19735e-10	2.17339e-11	6.40698e-15	2.79269e-07	-1.39198e-11	1.07015e-10	7.7824e-05	2.29419e-08	278.67
2022-03-21 11:35:23	1391103	1.99949e-11	2.94856e-11	3.25455e-07	1.46199e-12	3.04132e-10	1.29567e-11	5.89712e-15	3.25292e-07	1.46184e-12	1.01793e-10	3.98309e-05	1.81287e-08	122.447
2022-03-21 11:35:51	1419210	1.56734e-11	2.30664e-11	3.66305e-07	-1.62109e-11	2.75199e-10	1.01564e-11	4.61328e-15	3.66122e-07	-1.62093e-11	9.21091e-11	2.77404e-05	1.26004e-08	75.7682
2022-03-21 11:36:19	1447317	1.40964e-10	3.89968e-11	3.4812e-07	5.29436e-11	1.43164e-09	9.13447e-11	7.79936e-15	3.47946e-07	5.29383e-11	4.7917e-10	0.000262525	2.24154e-08	754.501
2022-03-21 11:36:52	1480755	9.07635e-09	4.42796e-11	3.29666e-07	1.22893e-10	2.0575e-09	5.88147e-09	8.85592e-15	3.29501e-07	1.22881e-10	6.88645e-10	0.0178496	2.68767e-08	54171.7
2022-03-21 11:37:15	1503783	1.10717e-08	4.39009e-11	3.37818e-07	1.12638e-10	1.6784e-09	7.17446e-09	8.78018e-15	3.37649e-07	1.12627e-10	5.6176e-10	0.0212483	2.60039e-08	62930.1
2022-03-21 11:37:35	1523159	1.19566e-08	4.19147e-11	3.38176e-07	1.21442e-10	1.31779e-09	7.74788e-09	8.38294e-15	3.38007e-07	1.2143e-10	4.41064e-10	0.0229222	2.48011e-08	67815.9
2022-03-21 11:37:54	1542535	1.22219e-08	4.06349e-11	3.35578e-07	1.15229e-10	1.09063e-09	7.91979e-09	8.12698e-15	3.3541e-07	1.15217e-10	3.65034e-10	0.0236123	2.423e-08	70398.1
2022-03-21 11:38:13	1561911	1.23422e-08	3.9652e-11	3.34682e-07	1.24904e-10	9.09586e-10	7.99775e-09	7.9304e-15	3.34515e-07	1.24892e-10	3.04438e-10	0.0239085	2.37072e-08	71472.2
2022-03-21 11:38:33	1581286	1.20453e-08	5.58282e-11	3.42745e-07	7.24118e-11	7.85114e-10	7.80535e-09	1.11656e-14	3.42574e-07	7.24046e-11	2.62778e-10	0.0227845	3.25934e-08	66509.7
2022-03-21 11:38:55	1603253	6.24634e-09	2.8984e-11	3.11212e-07	6.92728e-11	5.51873e-10	4.04763e-09	5.7968e-15	3.11056e-07	6.92659e-11	1.84712e-10	0.0130125	1.86358e-08	41833.3
2022-03-21 11:39:16	1624730	3.01273e-09	3.21066e-11	3.12466e-07	4.19249e-11	4.71594e-10	1.95225e-09	6.42132e-15	3.1231e-07	4.19207e-11	1.57843e-10	0.006251	2.05607e-08	20015.4
2022-03-21 11:39:38	1646206	1.59093e-09	2.95778e-11	3.32353e-07	1.85974e-11	4.32064e-10	1.03092e-09	5.91556e-15	3.32187e-07	1.85955e-11	1.44612e-10	0.00310344	1.78079e-08	9342.46
2022-03-21 11:40:07	1675223	7.02049e-10	2.04761e-11	3.50987e-07	1.67484e-11	3.68056e-10	4.54928e-10	4.09522e-15	3.50812e-07	1.67467e-11	1.23188e-10	0.00129679	1.16736e-08	3696.53
2022-03-21 11:40:35	1703330	3.75378e-10	4.26928e-11	2.4277e-07	1.75224e-11	5.97936e-10	2.43245e-10	8.53856e-15	2.42649e-07	1.75206e-11	2.00129e-10	0.00100246	3.5189e-08	4131.31
2022-03-21 11:41:03	1731436	1.65001e-10	2.37932e-11	8.16102e-08	-1.52649e-12	6.77771e-10	1.06921e-10	4.75864e-15	8.15694e-08	-1.52634e-12	2.2685e-10	0.00131079	5.83385e-08	16069.7
2022-03-21 11:41:31	1759543	8.54731e-11	3.52599e-11	2.86324e-08	-3.50449e-12	6.64449e-10	5.53866e-11	7.05198e-15	2.86181e-08	-3.50414e-12	2.22391e-10	0.00193537	2.46417e-07	67627.5
2022-03-21 11:42:00	1788670	6.07911e-11	4.28053e-11	1.3022e-08	1.55122e-11	6.13524e-10	3.93926e-11	8.56106e-15	1.30155e-08	1.55106e-11	2.05346e-10	0.0030266	6.57759e-07	232538
2022-03-21 11:42:29	1817277	4.05166e-11	2.47454e-11	8.29263e-09	1.05242e-11	5.57601e-10	2.62548e-11	4.94908e-15	8.28848e-09	1.05231e-11	1.86629e-10	0.00316762	5.97103e-07	382171
2022-03-21 11:42:57	1845885	4.73751e-11	2.72947e-11	6.64583e-09	6.99823e-12	5.11031e-10	3.06991e-11	5.45894e-15	6.64251e-09	6.99753e-12	1.71042e-10	0.00462161	8.21819e-07	695763
2022-03-21 11:43:29	1877612	3.79904e-11	3.47582e-11	6.14211e-09	2.78747e-11	4.8811e-10	2.46178e-11	6.95164e-15	6.13904e-09	2.78719e-11	1.6337e-10	0.00401004	1.13237e-06	653203
2022-03-21 11:44:00	1908320	3.44751e-11	3.63042e-11	5.93317e-09	-1.52542e-11	4.70051e-10	2.23399e-11	7.26084e-15	5.9302e-09	-1.52527e-11	1.57326e-10	0.00376713	1.22438e-06	635245
2022-03-21 11:44:31	1939026	3.70014e-11	2.24726e-11	5.84227e-09	1.85222e-11	4.30944e-10	2.39769e-11	4.49452e-15	5.83935e-09	1.85203e-11	1.44237e-10	0.00410609	7.69695e-07	703176
2022-03-21 11:45:01	1969733	1.72537e-11	4.59587e-11	5.75813e-09	8.50323e-12	4.31143e-10	1.11804e-11	9.19174e-15	5.75525e-09	8.50238e-12	1.44304e-10	0.00194264	1.5971e-06	337543
2022-03-21 11:45:32	2000440	4.11831e-11	5.1907e-11	5.70682e-09	-5.10624e-12	4.19334e-10	2.66866e-11	1.03814e-14	5.70397e-09	-5.10573e-12	1.40351e-10	0.00467861	1.82003e-06	820238
2022-03-21 11:46:03	2031147	2.62944e-11	4.46072e-11	5.66031e-09	-1.57272e-11	4.04015e-10	1.70388e-11	8.92144e-15	5.65748e-09	-1.57256e-11	1.35224e-10	0.00301172	1.57693e-06	532344
2022-03-21 11:46:33	2061854	2.54022e-11	3.80447e-11	5.64128e-09	-4.36449e-12	3.82392e-10	1.64606e-11	7.60894e-15	5.63846e-09	-4.36405e-12	1.27987e-10	0.00291935	1.34947e-06	517756
2022-03-21 11:47:04	2092561	3.91944e-11	4.92451e-11	5.60773e-09	-3.32174e-12	3.7995e-10	2.5398e-11	9.84902e-15	5.60493e-09	-3.32141e-12	1.27169e-10	0.00453137	1.75721e-06	808461
2022-03-21 11:47:35	2123268	4.00544e-11	4.63068e-11	5.57473e-09	5.46099e-12	3.76932e-10	2.59553e-11	9.26136e-15	5.57194e-09	5.46044e-12	1.26159e-10	0.00465821	1.66214e-06	836011
2022-03-21 11:48:05	2153975	3.39914e-11	4.10547e-11	5.56101e-09	-1.05672e-11	3.693e-10	2.20264e-11	8.21094e-15	5.55823e-09	-1.05661e-11	1.23605e-10	0.00396285	1.47726e-06	712970
2022-03-21 11:48:36	2184682	2.50582e-11	3.3499e-11	5.55933e-09	3.92374e-12	3.63771e-10	1.62377e-11	6.6998e-15	5.55655e-09	3.92335e-12	1.21754e-10	0.00292227	1.20575e-06	525914
2022-03-21 11:49:07	2215390	2.86702e-11	3.9693e-11	5.56244e-09	1.65012e-11	3.60907e-10	1.85783e-11	7.9386e-15	5.55966e-09	1.64995e-11	1.20796e-10	0.00334162	1.42789e-06	601048
2022-03-21 11:49:38	2246096	5.38359e-11	3.55568e-11	5.53347e-09	8.79348e-12	3.57398e-10	3.48857e-11	7.11136e-15	5.5307e-09	8.7926e-12	1.19621e-10	0.00630764	1.2858e-06	1.14048e+06
2022-03-21 11:50:08	2276803	2.27684e-11	4.49349e-11	5.52733e-09	-1.71999e-12	3.44368e-10	1.47539e-11	8.98698e-15	5.52457e-09	-1.71982e-12	1.1526e-10	0.0026706	1.62673e-06	483405
2022-03-21 11:50:39	2307510	3.10352e-11	3.87306e-11	5.52377e-09	1.61572e-11	3.4413e-10	2.01108e-11	7.74612e-15	5.52101e-09	1.61556e-11	1.1518e-10	0.0036426	1.40303e-06	659770
2022-03-21 11:51:10	2338217	3.24756e-11	4.43615e-11	5.50838e-09	-1.19109e-11	3.44636e-10	2.10442e-11	8.8723e-15	5.50563e-09	-1.19097e-11	1.1535e-10	0.00382231	1.6115e-06	694255
2022-03-21 11:51:40	2368925	1.56734e-11	4.17815e-11	5.50708e-09	1.15239e-11	3.34509e-10	1.01564e-11	8.3563e-15	5.50433e-09	1.15227e-11	1.1196e-10	0.00184516	1.51813e-06	335220
2022-03-21 11:52:11	2399631	2.11774e-11	2.47351e-11	5.53012e-09	1.54907e-11	3.33057e-10	1.3723e-11	4.94702e-15	5.52735e-09	1.54892e-11	1.11474e-10	0.00248273	8.95007e-07	449172
2022-03-21 11:52:42	2430338	2.94549e-11	3.99899e-11	5.46263e-09	-2.92507e-11	3.33257e-10	1.90868e-11	7.99798e-15	5.4599e-09	-2.92478e-11	1.11541e-10	0.00349581	1.46486e-06	640270
2022-03-21 11:53:13	2461045	2.37467e-11	5.0832e-11	5.51389e-09	1.71784e-11	3.40152e-10	1.53879e-11	1.01664e-14	5.51113e-09	1.71767e-11	1.13849e-10	0.00279214	1.8447e-06	506637
2022-03-21 11:53:43	2491752	2.04679e-11	3.2731e-11	5.26928e-09	3.93449e-12	3.25041e-10	1.32632e-11	6.5462e-15	5.26665e-09	3.9341e-12	1.08791e-10	0.00251834	1.24295e-06	478168
2022-03-21 11:54:14	2522460	2.93044e-11	3.87306e-11	5.12733e-09	-6.07374e-12	3.27859e-10	1.89893e-11	7.74612e-15	5.12477e-09	-6.07313e-12	1.09734e-10	0.00370539	1.51151e-06	723036
2022-03-21 11:54:45	2553166	1.46629e-11	3.80753e-11	5.43277e-09	-2.45422e-11	3.18806e-10	9.50156e-12	7.61506e-15	5.43005e-09	-2.45397e-11	1.06704e-10	0.00174981	1.40239e-06	322245
2022-03-21 11:55:15	2583873	1.70279e-11	3.82391e-11	4.78945e-08	9.90073e-12	3.7995e-10	1.10341e-11	7.64782e-15	4.78706e-08	9.89974e-12	1.27169e-10	0.000230498	1.5976e-07	4815.03
2022-03-21 11:55:47	2615600	2.59827e-11	2.67726e-11	2.5576e-07	4.92349e-12	3.23881e-10	1.68368e-11	5.35452e-15	2.55632e-07	4.923e-12	1.08403e-10	6.58634e-05	2.09462e-08	257.649
2022-03-21 11:56:16	2644727	2.40692e-11	2.96802e-11	3.31009e-07	3.47224e-11	3.0414e-10	1.55968e-11	5.93604e-15	3.30843e-07	3.47189e-11	1.01796e-10	4.71427e-05	1.79421e-08	142.492
2022-03-21 11:56:44	2672835	2.68104e-11	1.43332e-11	3.53495e-07	1.75224e-12	2.82202e-10	1.73731e-11	2.86664e-15	3.53318e-07	1.75206e-12	9.4453e-11	4.91714e-05	8.11348e-09	139.17
2022-03-21 11:57:12	2700941	2.62622e-11	3.10623e-11	3.67112e-07	4.67194e-11	8.59021e-10	1.70179e-11	6.21246e-15	3.66928e-07	4.67147e-11	2.87514e-10	4.63794e-05	1.6931e-08	126.399
2022-03-21 11:57:46	2734379	8.25018e-09	5.51423e-11	3.24559e-07	1.06575e-10	1.94586e-09	5.34612e-09	1.10285e-14	3.24397e-07	1.06564e-10	6.51279e-10	0.0164802	3.39968e-08	50802.6
2022-03-21 11:58:07	2755855	1.01562e-08	3.38266e-11	3.33697e-07	1.0335e-10	1.65472e-09	6.58122e-09	6.76532e-15	3.3353e-07	1.0334e-10	5.53835e-10	0.019732	2.0284e-08	59161.1
2022-03-21 11:58:30	2778882	1.15098e-08	4.8078e-11	3.36384e-07	1.32515e-10	1.26809e-09	7.45835e-09	9.6156e-15	3.36216e-07	1.32502e-10	4.2443e-10	0.0221832	2.85995e-08	65979.1
2022-03-21 11:58:50	2798259	1.19767e-08	4.10853e-11	3.34592e-07	1.30429e-10	1.04375e-09	7.7609e-09	8.21706e-15	3.34425e-07	1.30416e-10	3.49343e-10	0.0232067	2.45707e-08	69393
2022-03-21 11:59:06	2814385	1.20279e-08	3.7973e-11	3.33428e-07	1.21249e-10	8.71971e-10	7.79408e-09	7.5946e-15	3.33261e-07	1.21237e-10	2.91849e-10	0.0233873	2.27887e-08	70177
2022-03-21 11:59:25	2833761	1.23417e-08	4.46482e-11	3.35399e-07	1.03285e-10	7.49857e-10	7.99742e-09	8.92964e-15	3.35231e-07	1.03275e-10	2.50977e-10	0.0238564	2.66373e-08	71164.1
2022-03-21 11:59:45	2853136	1.06296e-08	2.91683e-11	3.1793e-07	6.87568e-11	5.66378e-10	6.88798e-09	5.83366e-15	3.17771e-07	6.87499e-11	1.89567e-10	0.0216759	1.83581e-08	68212.4
2022-03-21 12:00:07	2875104	4.22138e-09	3.81266e-11	3.09778e-07	4.18281e-11	4.80654e-10	2.73545e-09	7.62532e-15	3.09623e-07	4.18239e-11	1.60875e-10	0.00883479	2.46277e-08	28534
2022-03-21 12:00:28	2896580	2.10867e-09	3.08063e-11	3.22141e-07	7.11648e-12	4.20485e-10	1.36642e-09	6.16126e-15	3.2198e-07	7.11577e-12	1.40736e-10	0.0042438	1.91355e-08	13180.3
2022-03-21 12:00:50	2918056	1.16192e-09	2.53494e-11	3.42476e-07	1.16744e-11	3.821e-10	7.52924e-10	5.06988e-15	3.42305e-07	1.16732e-11	1.27889e-10	0.00219957	1.4811e-08	6425.77
2022-03-21 12:01:19	2947073	5.3193e-10	2.6404e-11	3.52062e-07	2.43379e-11	3.89234e-10	3.44691e-10	5.2808e-15	3.51886e-07	2.43355e-11	1.30277e-10	0.000979552	1.50071e-08	2783.72
2022-03-21 12:01:47	2975180	2.56559e-10	4.6532e-11	1.54262e-07	9.14823e-12	6.55734e-10	1.6625e-10	9.3064e-15	1.54185e-07	9.14732e-12	2.19474e-10	0.00107825	6.03587e-08	6993.25
2022-03-21 12:02:15	3003286	1.25484e-10	4.99618e-11	4.99867e-08	3.68831e-11	6.68419e-10	8.13136e-11	9.99236e-15	4.99617e-08	3.68794e-11	2.2372e-10	0.00162752	2e-07	32575.3
2022-03-21 12:02:44	3032415	7.36158e-11	2.32404e-11	1.93354e-08	2.01024e-12	6.22915e-10	4.7703e-11	4.64808e-15	1.93257e-08	2.01004e-12	2.0849e-10	0.00246837	2.40512e-07	127724
2022-03-21 12:03:13	3061021	6.27261e-11	3.78809e-11	1.02214e-08	4.29354e-11	5.91564e-10	4.06465e-11	7.57618e-15	1.02163e-08	4.29311e-11	1.97996e-10	0.0039786	7.41578e-07	389437
2022-03-21 12:03:41	3089628	5.59321e-11	4.11672e-11	7.25275e-09	1.36309e-11	5.23171e-10	3.6244e-11	8.23344e-15	7.24912e-09	1.36295e-11	1.75105e-10	0.00499978	1.13578e-06	689708
2022-03-21 12:04:13	3121355	3.81194e-11	2.97007e-11	6.38448e-09	-7.22398e-12	4.98354e-10	2.47014e-11	5.94014e-15	6.38129e-09	-7.22326e-12	1.66799e-10	0.00387091	9.30869e-07	606603
2022-03-21 12:04:44	3152062	4.24409e-11	3.3458e-11	6.04565e-09	1.32762e-11	4.69644e-10	2.75017e-11	6.6916e-15	6.04263e-09	1.32749e-11	1.5719e-10	0.00455128	1.1074e-06	753196
2022-03-21 12:05:14	3182770	3.33786e-11	3.8362e-11	5.88791e-09	4.00974e-12	4.66296e-10	2.16293e-11	7.6724e-15	5.88497e-09	4.00934e-12	1.56069e-10	0.00367535	1.30373e-06	624533
2022-03-21 12:05:45	3213476	4.18496e-11	4.12287e-11	5.80219e-09	-2.09624e-11	4.31696e-10	2.71185e-11	8.24574e-15	5.79929e-09	-2.09603e-11	1.44489e-10	0.00467618	1.42185e-06	806337
2022-03-21 12:06:16	3244183	4.06349e-11	3.76658e-11	5.77677e-09	3.13899e-12	4.13559e-10	2.63314e-11	7.53316e-15	5.77388e-09	3.13868e-12	1.38418e-10	0.00456044	1.3047e-06	789839
2022-03-21 12:06:46	3274890	3.28949e-11	2.37523e-11	5.72602e-09	2.12634e-11	4.07347e-10	2.13159e-11	4.75046e-15	5.72316e-09	2.12613e-11	1.36339e-10	0.0037245	8.30042e-07	650777
2022-03-21 12:07:17	3305597	3.47116e-11	2.88202e-11	5.71234e-09	4.37524e-12	3.99384e-10	2.24931e-11	5.76404e-15	5.70948e-09	4.3748e-12	1.33674e-10	0.00393961	1.00956e-06	690011
2022-03-21 12:07:45	3333055	2.95624e-11	3.83825e-11	5.63419e-09	1.19324e-12	3.81993e-10	1.91564e-11	7.6765e-15	5.63137e-09	1.19312e-12	1.27853e-10	0.00340173	1.36317e-06	604068
2022-03-21 12:08:15	3363761	2.14462e-11	2.4817e-11	5.63203e-09	-7.71848e-12	3.73116e-10	1.38971e-11	4.9634e-15	5.62921e-09	-7.71771e-12	1.24882e-10	0.00246875	8.81722e-07	438561
2022-03-21 12:08:46	3394468	2.89174e-11	4.72282e-11	5.62831e-09	1.49102e-11	3.76057e-10	1.87385e-11	9.44564e-15	5.6255e-09	1.49087e-11	1.25866e-10	0.00333099	1.67908e-06	592124
2022-03-21 12:09:17	3425175	3.39269e-11	2.92297e-11	5.61353e-09	5.04174e-12	3.56339e-10	2.19846e-11	5.84594e-15	5.61072e-09	5.04124e-12	1.19267e-10	0.00391832	1.04192e-06	698363
2022-03-21 12:09:47	3455882	3.05622e-11	4.08191e-11	5.59825e-09	2.79499e-13	3.63886e-10	1.98043e-11	8.16382e-15	5.59545e-09	2.79471e-13	1.21793e-10	0.00353936	1.45901e-06	632542
2022-03-21 12:10:18	3486590	3.79366e-11	3.65191e-11	5.57305e-09	1.33837e-11	3.47939e-10	2.45829e-11	7.30382e-15	5.57026e-09	1.33824e-11	1.16455e-10	0.00441324	1.31122e-06	792286
2022-03-21 12:10:49	3517296	3.63886e-11	4.78323e-11	5.57312e-09	-4.88049e-12	3.53106e-10	2.35798e-11	9.56646e-15	5.57033e-09	-4.88e-12	1.18185e-10	0.00423311	1.71739e-06	759938
2022-03-21 12:11:20	3548003	2.56709e-11	4.62761e-11	5.56092e-09	-1.26849e-12	3.55133e-10	1.66347e-11	9.25522e-15	5.55814e-09	-1.26836e-12	1.18863e-10	0.00299286	1.66517e-06	538465
2022-03-21 12:11:50	3578710	3.68509e-11	4.75866e-11	5.53728e-09	1.98229e-11	3.50672e-10	2.38794e-11	9.51732e-15	5.53451e-09	1.98209e-11	1.1737e-10	0.00431463	1.71963e-06	779587
2022-03-21 12:12:21	3609417	2.15429e-11	4.94601e-11	5.52488e-09	-1.11154e-11	3.4026e-10	1.39598e-11	9.89202e-15	5.52212e-09	-1.11143e-11	1.13885e-10	0.00252798	1.79135e-06	457792
2022-03-21 12:12:48	3636874	3.36689e-11	3.65704e-11	5.52438e-09	6.08449e-12	3.36397e-10	2.18174e-11	7.31408e-15	5.52162e-09	6.08388e-12	1.12592e-10	0.00395128	1.32463e-06	715602
2022-03-21 12:13:19	3667581	3.85064e-11	2.92194e-11	5.49153e-09	-1.34912e-11	3.41112e-10	2.49521e-11	5.84388e-15	5.48878e-09	-1.34899e-11	1.1417e-10	0.00454602	1.06469e-06	828239
2022-03-21 12:13:50	3698288	2.02099e-11	3.54544e-11	5.52238e-09	1.00834e-11	3.26484e-10	1.3096e-11	7.09088e-15	5.51962e-09	1.00824e-11	1.09274e-10	0.00237263	1.28467e-06	429854
2022-03-21 12:14:20	3728995	3.08417e-11	3.95804e-11	5.53064e-09	-6.36399e-12	3.29679e-10	1.99854e-11	7.91608e-15	5.52787e-09	-6.36335e-12	1.10344e-10	0.00361539	1.43203e-06	654029
2022-03-21 12:14:51	3759702	2.53377e-11	4.92247e-11	5.16624e-09	3.20349e-12	3.30254e-10	1.64188e-11	9.84494e-15	5.16366e-09	3.20317e-12	1.10536e-10	0.00317969	1.90658e-06	615783
2022-03-21 12:15:22	3790410	2.99064e-11	4.73409e-11	5.27649e-09	6.70798e-12	3.31714e-10	1.93793e-11	9.46818e-15	5.27385e-09	6.70731e-12	1.11025e-10	0.00367461	1.79531e-06	696760
2022-03-21 12:15:53	3821116	2.39187e-11	4.0809e-11	5.50642e-09	2.24889e-11	3.2511e-10	1.54993e-11	8.1618e-15	5.50367e-09	2.24867e-11	1.08814e-10	0.00281618	1.48297e-06	511692
2022-03-21 12:16:23	3851823	3.69369e-11	4.26518e-11	1.12157e-07	-2.23384e-11	3.70813e-10	2.39351e-11	8.53036e-15	1.12101e-07	-2.23362e-11	1.24111e-10	0.000213514	7.60954e-08	1904.66
2022-03-21 12:16:56	3884071	2.01669e-11	3.13182e-11	2.84426e-07	3.02074e-12	3.26991e-10	1.30682e-11	6.26364e-15	2.84284e-07	3.02044e-12	1.09444e-10	4.59687e-05	2.20331e-08	161.7
2022-03-21 12:17:24	3912178	3.34969e-11	2.56464e-11	3.49463e-07	3.93449e-12	2.94588e-10	2.1706e-11	5.12928e-15	3.49288e-07	3.9341e-12	9.85986e-11	6.21435e-05	1.46849e-08	177.915
2022-03-21 12:17:52	3940285	1.21367e-11	2.22269e-11	3.66395e-07	-3.59049e-12	2.72734e-10	7.86458e-12	4.44538e-15	3.66212e-07	-3.59013e-12	9.12841e-11	2.14755e-05	1.21388e-08	58.6423
2022-03-21 12:18:20	3968392	1.74246e-10	3.42258e-11	3.4382e-07	7.46263e-11	1.36644e-09	1.12911e-10	6.84516e-15	3.43648e-07	7.46188e-11	4.57347e-10	0.000328567	1.99191e-08	956.115
2022-03-21 12:18:53	4001830	8.12982e-09	3.59868e-11	3.29218e-07	1.04188e-10	1.80916e-09	5.26812e-09	7.19736e-15	3.29053e-07	1.04178e-10	6.05526e-10	0.0160099	2.18729e-08	48654.5
2022-03-21 12:19:15	4023307	1.04205e-08	3.72768e-11	3.35309e-07	1.22227e-10	1.47563e-09	6.75248e-09	7.45536e-15	3.35141e-07	1.22215e-10	4.93893e-10	0.0201482	2.22454e-08	60118.4
2022-03-21 12:19:38	4046335	1.15024e-08	4.57642e-11	3.33966e-07	1.16164e-10	1.1226e-09	7.45356e-09	9.15284e-15	3.33799e-07	1.16152e-10	3.75734e-10	0.0223295	2.74202e-08	66895
2022-03-21 12:19:57	4065711	1.19391e-08	4.27439e-11	3.3307e-07	1.17121e-10	9.1195e-10	7.73654e-09	8.54878e-15	3.32903e-07	1.17109e-10	3.0523e-10	0.0232396	2.56795e-08	69808.8
2022-03-21 12:20:17	4085086	1.21481e-08	4.76787e-11	3.32712e-07	1.08918e-10	7.81629e-10	7.87197e-09	9.53574e-15	3.32546e-07	1.08907e-10	2.61611e-10	0.0236718	2.8675e-08	71183.7
2022-03-21 12:20:36	4104463	1.17611e-08	3.67649e-11	3.76608e-07	8.15278e-11	6.24067e-10	7.62119e-09	7.35298e-15	3.7642e-07	8.15196e-11	2.08875e-10	0.0202465	1.9534e-08	53787.1
2022-03-21 12:20:58	4126430	5.66305e-09	2.45509e-11	3.0933e-07	5.09656e-11	4.93101e-10	3.66966e-09	4.91018e-15	3.09175e-07	5.09605e-11	1.65041e-10	0.0118692	1.58815e-08	38389.8
2022-03-21 12:21:19	4147906	2.75638e-09	3.01716e-11	3.13809e-07	2.47894e-11	4.29976e-10	1.78613e-09	6.03432e-15	3.13652e-07	2.47869e-11	1.43913e-10	0.00569464	1.92389e-08	18155.9
2022-03-21 12:21:41	4169383	1.45526e-09	4.58461e-11	3.34324e-07	6.98748e-12	4.00152e-10	9.43008e-10	9.16922e-15	3.34157e-07	6.98678e-12	1.33931e-10	0.00282205	2.74399e-08	8445.3
2022-03-21 12:22:09	4197360	6.80226e-10	2.02918e-11	3.52599e-07	2.48647e-11	3.59164e-10	4.40786e-10	4.05836e-15	3.52423e-07	2.48622e-11	1.20212e-10	0.00125073	1.15156e-08	3548.95
2022-03-21 12:22:37	4225467	3.62371e-10	3.14718e-11	2.23689e-07	-1.49424e-12	5.90089e-10	2.34816e-10	6.29436e-15	2.23577e-07	-1.49409e-12	1.97503e-10	0.00105027	2.8153e-08	4697.57
2022-03-21 12:23:05	4253575	1.581e-10	3.39391e-11	7.22332e-08	-9.24498e-13	6.65892e-10	1.02449e-10	6.78782e-15	7.21971e-08	-9.24406e-13	2.22874e-10	0.00141902	9.40179e-08	19654.8
2022-03-21 12:23:34	4282702	6.34679e-11	3.09087e-11	2.60873e-08	4.80524e-12	6.38319e-10	4.11272e-11	6.18174e-15	2.60743e-08	4.80476e-12	2.13645e-10	0.00157731	2.37082e-07	60493
2022-03-21 12:24:03	4311310	7.30138e-11	2.63937e-11	1.22796e-08	-1.58884e-11	5.90749e-10	4.73129e-11	5.27874e-15	1.22735e-08	-1.58868e-11	1.97724e-10	0.0038549	4.30094e-07	314084
2022-03-21 12:24:31	4339916	5.62761e-11	3.38061e-11	8.05801e-09	-1.58239e-11	5.53762e-10	3.64669e-11	6.76122e-15	8.05398e-09	-1.58223e-11	1.85344e-10	0.00452781	8.39488e-07	562183
2022-03-21 12:25:00	4368523	3.96029e-11	3.14207e-11	6.64963e-09	5.67599e-12	5.11061e-10	2.56627e-11	6.28414e-15	6.64631e-09	5.67542e-12	1.71052e-10	0.00386119	9.45509e-07	580954
2022-03-21 12:25:32	4400250	3.74959e-11	3.28539e-11	6.2e-09	8.53548e-12	4.75134e-10	2.42973e-11	6.57078e-15	6.1969e-09	8.53463e-12	1.59027e-10	0.00392089	1.06033e-06	632717
2022-03-21 12:26:02	4430957	5.44164e-11	4.11058e-11	6.01339e-09	1.62969e-11	4.49172e-10	3.52618e-11	8.22116e-15	6.01038e-09	1.62953e-11	1.50338e-10	0.00586682	1.36783e-06	976114
2022-03-21 12:26:33	4461665	4.62786e-11	3.10726e-11	5.90279e-09	-3.88074e-12	4.32641e-10	2.99885e-11	6.21452e-15	5.89984e-09	-3.88035e-12	1.44805e-10	0.00508294	1.05334e-06	861539
2022-03-21 12:27:04	4492371	2.51119e-11	3.24751e-11	5.82734e-09	2.47894e-11	4.22328e-10	1.62725e-11	6.49502e-15	5.82443e-09	2.47869e-11	1.41353e-10	0.00279384	1.11513e-06	479676
2022-03-21 12:27:35	4523078	4.43544e-11	4.61225e-11	5.77686e-09	1.51359e-11	4.15049e-10	2.87417e-11	9.2245e-15	5.77397e-09	1.51344e-11	1.38917e-10	0.0049778	1.5976e-06	862110
2022-03-21 12:28:05	4553785	3.05299e-11	4.65423e-11	5.73832e-09	-1.75224e-12	4.00006e-10	1.97834e-11	9.30846e-15	5.73545e-09	-1.75206e-12	1.33882e-10	0.00344931	1.62297e-06	601403
2022-03-21 12:28:36	4584492	4.48704e-11	4.25085e-11	5.67902e-09	-3.12824e-12	3.79835e-10	2.9076e-11	8.5017e-15	5.67618e-09	-3.12793e-12	1.27131e-10	0.00512246	1.49779e-06	902449
2022-03-21 12:29:07	4615200	3.61091e-11	3.39596e-11	5.67138e-09	-2.06399e-12	3.66006e-10	2.33987e-11	6.79192e-15	5.66854e-09	-2.06378e-12	1.22502e-10	0.00412781	1.19818e-06	728196
2022-03-21 12:29:37	4645906	1.37277e-11	2.82878e-11	5.63361e-09	-1.64474e-11	3.60247e-10	8.89555e-12	5.65756e-15	5.63079e-09	-1.64458e-11	1.20575e-10	0.0015798	1.00475e-06	280565
2022-03-21 12:30:05	4673363	2.87992e-11	4.78834e-11	5.63649e-09	2.46712e-11	3.64148e-10	1.86619e-11	9.57668e-15	5.63367e-09	2.46687e-11	1.2188e-10	0.00331256	1.6999e-06	587993
2022-03-21 12:30:36	4704070	2.73264e-11	3.57513e-11	5.62947e-09	-1.95649e-12	3.56354e-10	1.77075e-11	7.15026e-15	5.62666e-09	-1.95629e-12	1.19272e-10	0.00314708	1.27078e-06	559315
2022-03-21 12:31:06	4734777	2.84229e-11	3.87409e-11	5.59651e-09	-3.86999e-13	3.56876e-10	1.8418e-11	7.74818e-15	5.59371e-09	-3.8696e-13	1.19446e-10	0.00329263	1.38516e-06	588631
2022-03-21 12:31:37	4765485	2.54989e-11	2.87485e-11	5.60113e-09	3.10674e-12	3.32236e-10	1.65233e-11	5.7497e-15	5.59833e-09	3.10643e-12	1.11199e-10	0.00295147	1.02704e-06	527205
2022-03-21 12:32:08	4796191	2.70362e-11	3.75532e-11	5.5779e-09	-1.21152e-11	3.37496e-10	1.75195e-11	7.51064e-15	5.57511e-09	-1.2114e-11	1.1296e-10	0.00314244	1.34717e-06	563655
2022-03-21 12:32:38	4826898	2.91324e-11	2.12951e-11	5.5646e-09	1.07284e-11	3.30616e-10	1.88778e-11	4.25902e-15	5.56182e-09	1.07273e-11	1.10657e-10	0.00339418	7.6576e-07	610264
2022-03-21 12:33:09	4857605	2.52732e-11	3.17891e-11	5.57666e-09	2.83799e-11	3.37726e-10	1.6377e-11	6.35782e-15	5.57387e-09	2.83771e-11	1.13037e-10	0.00293818	1.14065e-06	527134
2022-03-21 12:33:40	4888312	3.58296e-11	3.12158e-11	5.55192e-09	-1.72429e-11	3.36129e-10	2.32176e-11	6.24316e-15	5.54914e-09	-1.72412e-11	1.12502e-10	0.00418399	1.12507e-06	753989
2022-03-21 12:34:11	4919020	1.67914e-11	3.44204e-11	5.50963e-09	-1.88124e-11	3.21156e-10	1.08808e-11	6.88408e-15	5.50688e-09	-1.88105e-11	1.07491e-10	0.00197586	1.25009e-06	358799
2022-03-21 12:34:41	4949726	2.09302e-11	3.26799e-11	5.5278e-09	5.04174e-12	3.27897e-10	1.35628e-11	6.53598e-15	5.52504e-09	5.04124e-12	1.09747e-10	0.00245478	1.18298e-06	444302
2022-03-21 12:35:12	4980433	3.34432e-11	4.07782e-11	5.52753e-09	-7.32073e-12	3.32374e-10	2.16712e-11	8.15564e-15	5.52477e-09	-7.32e-12	1.11246e-10	0.00392255	1.4762e-06	709995
2022-03-21 12:35:43	5011140	2.07904e-11	5.1088e-11	5.33224e-09	-3.34324e-12	3.22776e-10	1.34722e-11	1.02176e-14	5.32957e-09	-3.34291e-12	1.08033e-10	0.00252782	1.91715e-06	474300
2022-03-21 12:36:13	5041847	2.56494e-11	3.37958e-11	5.1502e-09	-7.85823e-12	3.31161e-10	1.66208e-11	6.75916e-15	5.14762e-09	-7.85744e-12	1.1084e-10	0.00322883	1.31306e-06	627247
2022-03-21 12:36:44	5072555	2.97129e-11	4.34913e-11	5.48387e-09	-7.96573e-12	3.17692e-10	1.9254e-11	8.69826e-15	5.48113e-09	-7.96493e-12	1.06332e-10	0.00351277	1.58695e-06	640885
2022-03-21 12:37:15	5103261	3.37334e-11	4.55696e-11	4.62775e-08	-4.09466e-11	3.73738e-10	2.18592e-11	9.11392e-15	4.62544e-08	-4.09425e-11	1.2509e-10	0.000472588	1.97039e-07	10217.1
2022-03-21 12:37:46	5134990	3.37549e-11	3.07961e-11	2.56298e-07	-1.86727e-11	3.12333e-10	2.18732e-11	6.15922e-15	2.5617e-07	-1.86708e-11	1.04538e-10	8.53854e-05	2.40435e-08	333.316
2022-03-21 12:38:16	5164117	7.86898e-12	1.5009e-11	3.19812e-07	-1.18249e-11	2.96922e-10	5.0991e-12	3.0018e-15	3.19652e-07	-1.18237e-11	9.93798e-11	1.5952e-05	9.39083e-09	49.9043
2022-03-21 12:38:44	5192225	1.71892e-11	3.94166e-11	3.65409e-07	-9.25573e-12	2.88821e-10	1.11386e-11	7.88332e-15	3.65226e-07	-9.2548e-12	9.66684e-11	3.04978e-05	2.15848e-08	83.5039
2022-03-21 12:39:12	5220331	2.75414e-11	1.90428e-11	3.58422e-07	8.28823e-12	7.44886e-10	1.78468e-11	3.80856e-15	3.58243e-07	8.2874e-12	2.49313e-10	4.98177e-05	1.06312e-08	139.061
2022-03-21 12:39:42	5250519	6.50735e-09	3.89661e-11	3.20259e-07	7.22721e-11	1.82594e-09	4.21676e-09	7.79322e-15	3.20099e-07	7.22649e-11	6.11142e-10	0.0131733	2.43463e-08	41153.9
2022-03-21 12:40:03	5271995	9.34707e-09	4.15461e-11	3.33697e-07	1.14455e-10	1.63409e-09	6.0569e-09	8.30922e-15	3.3353e-07	1.14444e-10	5.4693e-10	0.01816	2.4913e-08	54447.8
2022-03-21 12:40:27	5295022	1.10786e-08	2.55747e-11	3.36384e-07	1.20593e-10	1.31701e-09	7.17893e-09	5.11494e-15	3.36216e-07	1.20581e-10	4.40803e-10	0.0213522	1.52133e-08	63507.3
2022-03-21 12:40:43	5311148	1.15891e-08	4.49553e-11	3.32622e-07	1.14229e-10	1.04956e-09	7.50974e-09	8.99106e-15	3.32456e-07	1.14218e-10	3.51288e-10	0.0225887	2.70444e-08	67944.9
2022-03-21 12:41:02	5330524	1.19264e-08	3.9181e-11	3.31458e-07	1.088e-10	8.51536e-10	7.72831e-09	7.8362e-15	3.31292e-07	1.08789e-10	2.85009e-10	0.0233278	2.36534e-08	70414.4
2022-03-21 12:41:21	5349900	1.21138e-08	3.50756e-11	3.31009e-07	1.06263e-10	7.13591e-10	7.84974e-09	7.01512e-15	3.30843e-07	1.06252e-10	2.38839e-10	0.0237265	2.12037e-08	71715
2022-03-21 12:41:41	5369276	1.02648e-08	3.02842e-11	3.73562e-07	9.67928e-11	5.77212e-10	6.65159e-09	6.05684e-15	3.73375e-07	9.67831e-11	1.93193e-10	0.0178148	1.62219e-08	47712.8
2022-03-21 12:41:59	5387992	4.96531e-09	2.88611e-11	3.08434e-07	4.81921e-11	4.73391e-10	3.21752e-09	5.77222e-15	3.0828e-07	4.81873e-11	1.58444e-10	0.010437	1.8724e-08	33855.7
2022-03-21 12:42:21	5409470	2.44845e-09	3.38061e-11	3.14437e-07	2.32952e-11	4.25208e-10	1.5866e-09	6.76122e-15	3.1428e-07	2.32929e-11	1.42317e-10	0.00504835	2.15134e-08	16063.2
2022-03-21 12:42:42	5430945	1.31674e-09	3.71232e-11	3.34951e-07	1.85759e-11	3.80142e-10	8.53248e-10	7.42464e-15	3.34784e-07	1.8574e-11	1.27234e-10	0.00254865	2.21774e-08	7612.84
2022-03-21 12:43:11	5459963	6.03009e-10	2.3179e-11	3.52868e-07	6.95523e-12	3.33526e-10	3.9075e-10	4.6358e-15	3.52692e-07	6.95453e-12	1.11631e-10	0.00110791	1.31441e-08	3141.29
2022-03-21 12:43:40	5488070	3.20134e-10	2.77861e-11	2.02547e-07	-1.56197e-11	6.04026e-10	2.07447e-10	5.55722e-15	2.02446e-07	-1.56181e-11	2.02168e-10	0.0010247	2.74504e-08	5061.62
2022-03-21 12:44:08	5516176	1.47457e-10	4.23958e-11	6.51169e-08	1.12337e-11	6.75651e-10	9.55521e-11	8.47916e-15	6.50843e-08	1.12326e-11	2.2614e-10	0.00146813	1.3028e-07	22557.3
2022-03-21 12:44:37	5545305	7.43683e-11	3.92834e-11	2.39562e-08	5.97699e-12	6.23629e-10	4.81907e-11	7.85668e-15	2.39442e-08	5.97639e-12	2.08729e-10	0.00201262	3.28124e-07	84054.6
2022-03-21 12:45:05	5573911	4.72246e-11	3.59766e-11	1.16407e-08	2.47249e-13	5.77197e-10	3.06015e-11	7.19532e-15	1.16349e-08	2.47224e-13	1.93188e-10	0.00263016	6.18427e-07	226058
2022-03-21 12:45:34	5602518	5.36424e-11	2.32507e-11	7.8654e-09	2.96484e-11	5.34089e-10	3.47603e-11	4.65014e-15	7.86147e-09	2.96454e-11	1.7876e-10	0.0044216	5.9151e-07	562440
2022-03-21 12:46:03	5631125	4.01081e-11	3.4451e-11	6.60314e-09	9.90073e-12	5.04581e-10	2.599e-11	6.8902e-15	6.59984e-09	9.89974e-12	1.68883e-10	0.00393798	1.044e-06	596679
2022-03-21 12:46:34	5662852	4.76224e-11	4.34401e-11	6.16579e-09	1.23732e-11	4.71609e-10	3.08593e-11	8.68802e-15	6.16271e-09	1.2372e-11	1.57848e-10	0.00500743	1.40977e-06	812537
2022-03-21 12:47:05	5693560	3.06697e-11	2.15613e-11	5.99053e-09	-1.39749e-12	4.32756e-10	1.9874e-11	4.31226e-15	5.98753e-09	-1.39735e-12	1.44843e-10	0.00331922	7.20206e-07	554356
2022-03-21 12:47:36	5724266	3.09707e-11	5.50091e-11	5.87644e-09	8.81498e-12	4.3251e-10	2.0069e-11	1.10018e-14	5.8735e-09	8.8141e-12	1.44761e-10	0.00341687	1.87313e-06	581744
2022-03-21 12:48:06	5754973	3.19919e-11	4.11263e-11	5.82583e-09	1.91672e-11	4.12684e-10	2.07308e-11	8.22526e-15	5.82292e-09	1.91653e-11	1.38125e-10	0.0035602	1.41257e-06	611412
2022-03-21 12:48:37	5785680	3.30024e-11	3.98875e-11	5.76779e-09	-1.34374e-12	4.13659e-10	2.13856e-11	7.9775e-15	5.76491e-09	-1.34361e-12	1.38452e-10	0.00370961	1.3838e-06	643481
2022-03-21 12:49:08	5816387	4.09144e-11	4.36551e-11	5.73146e-09	-4.00974e-12	3.89771e-10	2.65125e-11	8.73102e-15	5.72859e-09	-4.00934e-12	1.30456e-10	0.0046281	1.52411e-06	807895
2022-03-21 12:49:39	5847095	3.16157e-11	3.57923e-11	5.69776e-09	-5.53624e-12	3.79167e-10	2.0487e-11	7.15846e-15	5.69491e-09	-5.53569e-12	1.26907e-10	0.00359742	1.25699e-06	631690
2022-03-21 12:50:09	5877801	2.83154e-11	4.26723e-11	5.69854e-09	2.02099e-11	3.74137e-10	1.83484e-11	8.53446e-15	5.69569e-09	2.02079e-11	1.25224e-10	0.00322145	1.49841e-06	565594
2022-03-21 12:50:40	5908508	3.35614e-11	3.53623e-11	5.64927e-09	9.88998e-13	3.62412e-10	2.17478e-11	7.07246e-15	5.64645e-09	9.88899e-13	1.21299e-10	0.00385159	1.25255e-06	682126
2022-03-21 12:51:11	5939215	2.53162e-11	3.50142e-11	5.65176e-09	7.76148e-12	3.60109e-10	1.64049e-11	7.00284e-15	5.64893e-09	7.7607e-12	1.20528e-10	0.00290407	1.23967e-06	514092
2022-03-21 12:51:41	5969922	2.50904e-11	4.83544e-11	5.61753e-09	1.25237e-11	3.45451e-10	1.62586e-11	9.67088e-15	5.61472e-09	1.25224e-11	1.15622e-10	0.00289571	1.72241e-06	515735
2022-03-21 12:52:12	6000630	2.84229e-11	2.91785e-11	5.61801e-09	2.00379e-11	3.44337e-10	1.8418e-11	5.8357e-15	5.6152e-09	2.00359e-11	1.1525e-10	0.00328003	1.03927e-06	584134
2022-03-21 12:52:43	6031336	2.99064e-11	4.36449e-11	5.58823e-09	-9.69648e-12	3.40168e-10	1.93793e-11	8.72898e-15	5.58544e-09	-9.69551e-12	1.13854e-10	0.00346962	1.56281e-06	621191
2022-03-21 12:53:14	6062043	2.14462e-11	3.03764e-11	5.62132e-09	2.52624e-11	3.30446e-10	1.38971e-11	6.07528e-15	5.61851e-09	2.52599e-11	1.106e-10	0.00247346	1.0813e-06	440234
2022-03-21 12:53:44	6092750	1.97369e-11	3.24444e-11	5.57302e-09	-1.63399e-12	3.32359e-10	1.27895e-11	6.48888e-15	5.57023e-09	-1.63383e-12	1.11241e-10	0.00229605	1.16492e-06	412199
2022-03-21 12:54:12	6120206	1.91457e-11	2.90659e-11	5.55143e-09	-2.61762e-11	3.24634e-10	1.24064e-11	5.81318e-15	5.54865e-09	-2.61736e-11	1.08655e-10	0.00223593	1.04767e-06	402968
2022-03-21 12:54:42	6150915	1.84362e-11	3.0315e-11	5.5611e-09	2.53699e-12	3.22999e-10	1.19467e-11	6.063e-15	5.55832e-09	2.53674e-12	1.08108e-10	0.00214933	1.0908e-06	386687
2022-03-21 12:55:13	6181621	2.61547e-11	3.11953e-11	5.54767e-09	-8.41723e-12	3.17761e-10	1.69482e-11	6.23906e-15	5.5449e-09	-8.41639e-12	1.06355e-10	0.00305655	1.12519e-06	551236
2022-03-21 12:55:44	6212328	3.57436e-11	4.4167e-11	5.5638e-09	1.39749e-13	3.24787e-10	2.31619e-11	8.8334e-15	5.56102e-09	1.39735e-13	1.08706e-10	0.00416504	1.58845e-06	748970
2022-03-21 12:56:15	6243035	6.82623e-12	4.2703e-11	5.55214e-09	4.12906e-11	3.21562e-10	4.4234e-12	8.5406e-15	5.54936e-09	4.12865e-11	1.07627e-10	0.0007971	1.53902e-06	143638
2022-03-21 12:56:45	6273742	1.52112e-11	3.39596e-11	5.29263e-09	1.94144e-11	3.14368e-10	9.85686e-12	6.79192e-15	5.28998e-09	1.94125e-11	1.05219e-10	0.00186331	1.28392e-06	352233
2022-03-21 12:57:16	6304450	3.46256e-11	3.54442e-11	5.22219e-09	1.12767e-11	3.19881e-10	2.24374e-11	7.08884e-15	5.21958e-09	1.12756e-11	1.07064e-10	0.0042987	1.35812e-06	823572
2022-03-21 12:57:47	6335156	2.72619e-11	3.12056e-11	5.51332e-09	1.43297e-11	3.09569e-10	1.76657e-11	6.24112e-15	5.51056e-09	1.43283e-11	1.03613e-10	0.00320579	1.13257e-06	581754
2022-03-21 12:58:17	6365863	1.66839e-11	4.5969e-11	6.47154e-08	5.62224e-12	3.63219e-10	1.08112e-11	9.1938e-15	6.4683e-08	5.62168e-12	1.21569e-10	0.000167141	1.42136e-07	2584
2022-03-21 12:58:49	6397590	2.58537e-11	3.42668e-11	2.67585e-07	1.55444e-11	3.17808e-10	1.67532e-11	6.85336e-15	2.67451e-07	1.55428e-11	1.0637e-10	6.26402e-05	2.56247e-08	234.212
2022-03-21 12:59:18	6426717	7.84748e-12	2.87588e-11	3.23395e-07	1.75439e-11	2.87823e-10	5.08517e-12	5.75176e-15	3.23233e-07	1.75421e-11	9.63344e-11	1.57322e-05	1.77945e-08	48.6713
2022-03-21 12:59:46	6454825	3.74099e-12	1.48451e-11	3.64245e-07	3.27659e-11	2.81189e-10	2.42416e-12	2.96902e-15	3.64063e-07	3.27626e-11	9.4114e-11	6.65863e-06	8.15524e-09	18.2898
2022-03-21 13:00:14	6482931	2.67782e-11	3.33044e-11	3.54749e-07	5.14816e-11	9.29693e-10	1.73523e-11	6.66088e-15	3.54572e-07	5.14765e-11	3.11168e-10	4.89387e-05	1.87857e-08	138.022
2022-03-21 13:00:48	6516369	7.33679e-09	4.06656e-11	3.28322e-07	1.23291e-10	1.81526e-09	4.75424e-09	8.13312e-15	3.28158e-07	1.23279e-10	6.07568e-10	0.0144877	2.47842e-08	44148.5
2022-03-21 13:01:09	6537845	9.75674e-09	3.87101e-11	3.33338e-07	1.17658e-10	1.53521e-09	6.32237e-09	7.74202e-15	3.33171e-07	1.17646e-10	5.13835e-10	0.0189763	2.32374e-08	56956.7
2022-03-21 13:01:32	6560871	1.11289e-08	4.49963e-11	3.34055e-07	1.2327e-10	1.16734e-09	7.21153e-09	8.99926e-15	3.33888e-07	1.23258e-10	3.90709e-10	0.0215986	2.69529e-08	64688.3
2022-03-21 13:01:52	6580248	1.16335e-08	3.84747e-11	3.29038e-07	1.14756e-10	9.30564e-10	7.53851e-09	7.69494e-15	3.28873e-07	1.14745e-10	3.1146e-10	0.0229222	2.33979e-08	69699.2
2022-03-21 13:02:11	6599624	1.18793e-08	2.64551e-11	3.29576e-07	9.72013e-11	7.77414e-10	7.69779e-09	5.29102e-15	3.29411e-07	9.71916e-11	2.602e-10	0.0233683	1.60621e-08	70939.7
2022-03-21 13:02:31	6619000	1.19257e-08	3.69901e-11	3.35668e-07	9.72228e-11	6.79153e-10	7.72785e-09	7.39802e-15	3.355e-07	9.72131e-11	2.27313e-10	0.0230338	2.20507e-08	68655.2
2022-03-21 13:02:52	6640966	6.69787e-09	4.80677e-11	3.07987e-07	3.86676e-11	4.96826e-10	4.34022e-09	9.61354e-15	3.07833e-07	3.86637e-11	1.66288e-10	0.0140993	3.12297e-08	45801.7
2022-03-21 13:03:14	6662444	3.05679e-09	2.95675e-11	3.08793e-07	-1.06209e-11	4.3509e-10	1.9808e-09	5.9135e-15	3.08639e-07	-1.06198e-11	1.45625e-10	0.00641786	1.91599e-08	20794.1
2022-03-21 13:03:35	6683920	1.61322e-09	3.86896e-11	3.29934e-07	-5.37499e-12	3.91591e-10	1.04537e-09	7.73792e-15	3.29769e-07	-5.37445e-12	1.31066e-10	0.00317	2.34647e-08	9612.78
2022-03-21 13:03:57	6705396	9.10072e-10	2.94242e-11	3.47134e-07	2.15537e-11	3.59817e-10	5.89727e-10	5.88484e-15	3.4696e-07	2.15515e-11	1.20431e-10	0.00169969	1.69611e-08	4898.81
2022-03-21 13:04:26	6734413	4.24484e-10	3.30485e-11	3.16855e-07	1.04489e-11	4.66157e-10	2.75066e-10	6.6097e-15	3.16697e-07	1.04479e-11	1.56023e-10	0.000868546	2.08708e-08	2742.52
2022-03-21 13:04:54	6762520	1.92295e-10	2.97416e-11	1.14128e-07	1.70494e-11	6.42127e-10	1.24607e-10	5.94832e-15	1.14071e-07	1.70477e-11	2.1492e-10	0.00109237	5.21458e-08	9576.2
2022-03-21 13:05:22	6790626	9.52018e-11	1.60635e-11	3.79368e-08	1.26527e-11	6.21694e-10	6.16908e-11	3.2127e-15	3.79178e-08	1.26514e-11	2.08081e-10	0.00162696	8.47279e-08	42907.5
2022-03-21 13:05:51	6819755	6.91653e-11	3.71437e-11	1.58019e-08	5.05249e-12	5.8754e-10	4.48191e-11	7.42874e-15	1.5794e-08	5.05198e-12	1.9665e-10	0.00283773	4.70352e-07	179671
2022-03-21 13:06:20	6848361	4.94391e-11	2.36602e-11	9.19e-09	-2.45744e-11	5.41016e-10	3.20365e-11	4.73204e-15	9.1854e-09	-2.45719e-11	1.81078e-10	0.00348777	5.15169e-07	379707
2022-03-21 13:06:48	6876968	4.66441e-11	3.49425e-11	6.98581e-09	3.56899e-11	5.08213e-10	3.02254e-11	6.9885e-15	6.98232e-09	3.56863e-11	1.70099e-10	0.00432885	1.00089e-06	619973
2022-03-21 13:07:20	6908695	3.96566e-11	3.98977e-11	6.35231e-09	4.80524e-12	4.71509e-10	2.56975e-11	7.97954e-15	6.34913e-09	4.80476e-12	1.57814e-10	0.0040474	1.25679e-06	637473
2022-03-21 13:07:51	6939402	5.77059e-11	2.99054e-11	6.03596e-09	-1.69849e-12	4.4736e-10	3.73934e-11	5.98108e-15	6.03294e-09	-1.69832e-12	1.49731e-10	0.00619821	9.91404e-07	1.02739e+06
2022-03-21 13:08:22	6970110	3.27981e-11	4.4812e-11	5.90329e-09	-1.01372e-11	4.40396e-10	2.12532e-11	8.9624e-15	5.90034e-09	-1.01362e-11	1.47401e-10	0.00360203	1.51896e-06	610478
2022-03-21 13:08:52	7000816	4.15486e-11	2.5718e-11	5.84373e-09	-5.89099e-12	4.09597e-10	2.69235e-11	5.1436e-15	5.84081e-09	-5.8904e-12	1.37092e-10	0.00460955	8.80632e-07	789197
2022-03-21 13:09:23	7031523	2.74339e-11	3.02023e-11	5.78944e-09	3.59049e-12	3.95937e-10	1.77772e-11	6.04046e-15	5.78655e-09	3.59013e-12	1.3252e-10	0.00307216	1.04388e-06	530914
2022-03-21 13:09:54	7062230	2.46067e-11	4.51601e-11	5.72444e-09	-1.39427e-11	3.85509e-10	1.59451e-11	9.03202e-15	5.72158e-09	-1.39413e-11	1.2903e-10	0.00278684	1.57859e-06	487076
2022-03-21 13:10:24	7092937	2.83154e-11	4.62863e-11	5.71466e-09	-4.94499e-12	3.80511e-10	1.83484e-11	9.25726e-15	5.7118e-09	-4.9445e-12	1.27357e-10	0.00321236	1.62072e-06	562408
2022-03-21 13:10:55	7123645	2.39079e-11	2.38751e-11	5.70682e-09	5.33199e-12	3.57997e-10	1.54923e-11	4.77502e-15	5.70397e-09	5.33146e-12	1.19822e-10	0.00271606	8.3714e-07	476171
2022-03-21 13:11:26	7154351	2.09302e-11	3.49323e-11	5.66391e-09	3.89364e-11	3.56646e-10	1.35628e-11	6.98646e-15	5.66108e-09	3.89325e-11	1.19369e-10	0.00239579	1.23412e-06	423204
2022-03-21 13:11:57	7185058	1.73074e-11	5.17125e-11	5.64515e-09	1.58024e-12	3.60999e-10	1.12152e-11	1.03425e-14	5.64233e-09	1.58008e-12	1.20826e-10	0.00198769	1.83302e-06	352282
2022-03-21 13:12:27	7215765	3.14867e-11	4.01025e-11	5.61751e-09	-9.02998e-13	3.47915e-10	2.04034e-11	8.0205e-15	5.6147e-09	-9.02908e-13	1.16447e-10	0.00363392	1.42848e-06	647215
2022-03-21 13:12:58	7246472	1.88232e-11	3.70413e-11	5.61008e-09	-1.85437e-11	3.43799e-10	1.21974e-11	7.40826e-15	5.60727e-09	-1.85418e-11	1.1507e-10	0.00217529	1.32119e-06	387940
2022-03-21 13:13:29	7277180	2.38972e-11	3.21577e-11	5.59877e-09	5.88024e-12	3.31759e-10	1.54854e-11	6.43154e-15	5.59597e-09	5.87965e-12	1.1104e-10	0.00276724	1.14932e-06	494506
2022-03-21 13:13:59	7307886	9.69648e-12	3.14513e-11	5.62198e-09	2.44454e-11	3.24111e-10	6.28332e-12	6.29026e-15	5.61917e-09	2.4443e-11	1.0848e-10	0.00111819	1.11943e-06	198996
2022-03-21 13:14:30	7338593	3.27551e-11	3.94677e-11	5.57765e-09	4.39674e-12	3.33595e-10	2.12253e-11	7.89354e-15	5.57486e-09	4.3963e-12	1.11654e-10	0.00380732	1.41592e-06	682945
2022-03-21 13:15:01	7369300	1.50499e-11	3.94063e-11	5.58178e-09	4.89339e-11	3.29126e-10	9.75234e-12	7.88126e-15	5.57899e-09	4.8929e-11	1.10158e-10	0.00174805	1.41267e-06	313327
2022-03-21 13:15:32	7400007	2.39079e-11	3.81266e-11	5.55513e-09	1.67484e-11	3.19082e-10	1.54923e-11	7.62532e-15	5.55235e-09	1.67467e-11	1.06797e-10	0.00279023	1.37335e-06	502530
2022-03-21 13:15:59	7427465	2.73802e-11	3.39904e-11	5.53568e-09	3.64424e-12	3.17301e-10	1.77424e-11	6.79808e-15	5.53291e-09	3.64388e-12	1.06201e-10	0.0032067	1.22866e-06	579568
2022-03-21 13:16:30	7458171	1.98014e-11	4.50577e-11	5.54059e-09	-1.46414e-11	3.1889e-10	1.28313e-11	9.01154e-15	5.53782e-09	-1.46399e-11	1.06732e-10	0.00231703	1.62727e-06	418402
2022-03-21 13:17:00	7488878	2.97344e-11	4.5631e-11	5.56003e-09	2.97667e-11	3.09837e-10	1.92679e-11	9.1262e-15	5.55725e-09	2.97637e-11	1.03702e-10	0.00346716	1.64222e-06	623899
2022-03-21 13:17:31	7519585	3.86246e-11	4.78015e-11	6.40078e-09	-6.18124e-12	3.20234e-10	2.50287e-11	9.5603e-15	6.39758e-09	-6.18062e-12	1.07182e-10	0.00391222	1.49436e-06	611516
2022-03-21 13:18:02	7550292	2.82509e-11	3.93449e-11	5.12362e-09	8.29898e-12	3.15658e-10	1.83066e-11	7.86898e-15	5.12106e-09	8.29815e-12	1.05651e-10	0.00357477	1.53659e-06	698052
2022-03-21 13:18:33	7581000	2.79392e-11	3.22909e-11	5.39551e-09	1.47489e-11	3.13869e-10	1.81046e-11	6.45818e-15	5.39281e-09	1.47474e-11	1.05052e-10	0.00335717	1.19755e-06	622527
2022-03-21 13:19:03	7611706	2.76704e-11	2.5974e-11	5.96213e-09	-3.62596e-11	3.3136e-10	1.79304e-11	5.1948e-15	5.95915e-09	-3.6256e-11	1.10906e-10	0.00300889	8.71735e-07	504919
2022-03-21 13:19:34	7642413	3.10137e-11	3.80856e-11	2.26824e-07	-1.07499e-12	3.19927e-10	2.00969e-11	7.61712e-15	2.26711e-07	-1.07488e-12	1.0708e-10	8.86455e-05	3.35984e-08	391.007
2022-03-21 13:20:06	7674661	2.20697e-11	3.56694e-11	3.1587e-07	-2.98849e-12	2.98911e-10	1.43012e-11	7.13388e-15	3.15712e-07	-2.98819e-12	1.00046e-10	4.52981e-05	2.25962e-08	143.479
2022-03-21 13:20:34	7702768	2.80467e-11	2.48478e-11	3.42208e-07	-2.34349e-12	2.67666e-10	1.81743e-11	4.96956e-15	3.42037e-07	-2.34326e-12	8.95878e-11	5.31354e-05	1.45293e-08	155.35
2022-03-21 13:21:02	7730875	1.54584e-11	3.9867e-11	3.71501e-07	-8.06248e-13	2.97283e-10	1.0017e-11	7.9734e-15	3.71315e-07	-8.06167e-13	9.95006e-11	2.69772e-05	2.14734e-08	72.6531
2022-03-21 13:21:30	7758982	2.80747e-09	3.20451e-11	3.38534e-07	6.67896e-11	1.66158e-09	1.81924e-09	6.40902e-15	3.38365e-07	6.67829e-11	5.56131e-10	0.00537657	1.89412e-08	15889.9
2022-03-21 13:22:04	7792420	9.22447e-09	6.16536e-11	3.32532e-07	1.29096e-10	1.60331e-09	5.97746e-09	1.23307e-14	3.32366e-07	1.29083e-10	5.36628e-10	0.0179846	3.70999e-08	54110.8
2022-03-21 13:22:27	7815448	1.10167e-08	4.19966e-11	3.35041e-07	1.46941e-10	1.23059e-09	7.13882e-09	8.39932e-15	3.34873e-07	1.46926e-10	4.11878e-10	0.021318	2.50821e-08	63659.8
2022-03-21 13:22:46	7834824	1.15521e-08	3.6683e-11	3.31458e-07	1.07532e-10	9.79329e-10	7.48576e-09	7.3366e-15	3.31292e-07	1.07521e-10	3.27781e-10	0.0225956	2.21454e-08	68204.5
2022-03-21 13:23:06	7854200	1.18586e-08	3.3458e-11	3.29845e-07	1.19206e-10	8.10714e-10	7.68437e-09	6.6916e-15	3.2968e-07	1.19194e-10	2.71346e-10	0.0233086	2.02973e-08	70700.6
2022-03-21 13:23:25	7873576	1.2042e-08	3.40723e-11	3.3092e-07	1.06973e-10	6.84904e-10	7.80322e-09	6.81446e-15	3.30755e-07	1.06962e-10	2.29237e-10	0.0235922	2.06028e-08	71328.3
2022-03-21 13:23:44	7892951	9.83559e-09	3.1308e-11	3.16945e-07	6.47471e-11	5.26849e-10	6.37346e-09	6.2616e-15	3.16787e-07	6.47406e-11	1.76336e-10	0.0201191	1.9766e-08	63510
2022-03-21 13:24:06	7914918	3.99783e-09	2.88611e-11	3.06912e-07	2.93474e-11	4.42869e-10	2.59059e-09	5.77222e-15	3.06759e-07	2.93445e-11	1.48228e-10	0.00844506	1.88168e-08	27530
2022-03-21 13:24:28	7936395	2.02434e-09	3.29051e-11	3.21783e-07	6.50374e-11	4.0006e-10	1.31177e-09	6.58102e-15	3.21622e-07	6.50309e-11	1.339e-10	0.00407861	2.0462e-08	12681.4
2022-03-21 13:24:49	7957871	1.08457e-09	1.5828e-11	3.42297e-07	1.62324e-11	3.60262e-10	7.02801e-10	3.1656e-15	3.42126e-07	1.62308e-11	1.2058e-10	0.00205422	9.25274e-09	6004.28
2022-03-21 13:25:18	7986888	5.26985e-10	2.56259e-11	3.53674e-07	6.98748e-13	3.75297e-10	3.41486e-10	5.12518e-15	3.53497e-07	6.98678e-13	1.25612e-10	0.000966023	1.44985e-08	2732.76
2022-03-21 13:25:46	8014994	2.52226e-10	3.65909e-11	1.53366e-07	4.07424e-12	6.23629e-10	1.63442e-10	7.31818e-15	1.53289e-07	4.07383e-12	2.08729e-10	0.00106624	4.7741e-08	6955.7
2022-03-21 13:26:15	8043101	1.22291e-10	3.66932e-11	4.92993e-08	1.68989e-11	6.44185e-10	7.92446e-11	7.33864e-15	4.92747e-08	1.68972e-11	2.15609e-10	0.00160822	1.48933e-07	32637.9
2022-03-21 13:26:44	8072230	8.07323e-11	3.13899e-11	1.92458e-08	1.14917e-11	5.9872e-10	5.23145e-11	6.27798e-15	1.92362e-08	1.14906e-11	2.00392e-10	0.00271959	3.26363e-07	141379
2022-03-21 13:27:12	8100836	6.06191e-11	2.98747e-11	1.01682e-08	4.93424e-12	5.54606e-10	3.92812e-11	5.97494e-15	1.01631e-08	4.93375e-12	1.85627e-10	0.00386507	5.87904e-07	380304
2022-03-21 13:27:41	8129443	4.68591e-11	3.0315e-11	7.30001e-09	5.35349e-12	5.11729e-10	3.03647e-11	6.063e-15	7.29636e-09	5.35295e-12	1.71276e-10	0.00416162	8.30962e-07	570370
2022-03-21 13:28:09	8157920	4.94069e-11	2.91888e-11	6.4769e-09	2.10807e-11	4.90299e-10	3.20157e-11	5.83776e-15	6.47366e-09	2.10786e-11	1.64103e-10	0.00494553	9.01771e-07	763946
2022-03-21 13:28:40	8188627	3.94954e-11	4.48428e-11	6.12249e-09	1.36417e-11	4.48213e-10	2.5593e-11	8.96856e-15	6.11943e-09	1.36403e-11	1.50017e-10	0.00418226	1.46559e-06	683439
2022-03-21 13:29:11	8219335	3.90009e-11	3.34682e-11	5.98907e-09	7.70773e-12	4.26482e-10	2.52726e-11	6.69364e-15	5.98608e-09	7.70696e-12	1.42744e-10	0.0042219	1.1182e-06	705286
2022-03-21 13:29:42	8250041	4.55369e-11	3.86077e-11	5.90372e-09	6.66498e-12	4.12791e-10	2.95079e-11	7.72154e-15	5.90077e-09	6.66431e-12	1.38161e-10	0.00500069	1.30857e-06	847464
2022-03-21 13:30:12	8280748	4.57949e-11	4.6102e-11	5.83013e-09	8.29898e-12	4.02256e-10	2.96751e-11	9.2204e-15	5.82721e-09	8.29815e-12	1.34635e-10	0.0050925	1.5823e-06	873917
2022-03-21 13:30:43	8311455	3.21962e-11	4.17713e-11	5.76954e-09	-1.78557e-11	3.87491e-10	2.08631e-11	8.35426e-15	5.76666e-09	-1.78539e-11	1.29693e-10	0.00361789	1.44872e-06	627381
2022-03-21 13:31:14	8342162	2.60472e-11	3.16561e-11	5.72839e-09	-1.24592e-11	3.75704e-10	1.68786e-11	6.33122e-15	5.72553e-09	-1.2458e-11	1.25748e-10	0.00294795	1.10579e-06	514879
2022-03-21 13:31:43	8371830	4.64291e-11	4.14642e-11	5.69943e-09	-8.41723e-12	3.62865e-10	3.00861e-11	8.29284e-15	5.69658e-09	-8.41639e-12	1.21451e-10	0.00528142	1.45576e-06	927122
2022-03-21 13:32:14	8402536	2.19407e-11	3.38982e-11	5.66532e-09	6.29949e-12	3.64263e-10	1.42176e-11	6.77964e-15	5.66249e-09	6.29886e-12	1.21919e-10	0.00251084	1.19729e-06	443416
2022-03-21 13:32:45	8433243	2.28867e-11	3.82085e-11	5.646e-09	1.56197e-11	3.44268e-10	1.48306e-11	7.6417e-15	5.64318e-09	1.56181e-11	1.15226e-10	0.00262806	1.35415e-06	465705
2022-03-21 13:33:15	8463950	2.05432e-11	6.16536e-11	5.64029e-09	5.46099e-12	3.45796e-10	1.3312e-11	1.23307e-14	5.63747e-09	5.46044e-12	1.15738e-10	0.00236134	2.18728e-06	418866
2022-03-21 13:33:46	8494657	3.52599e-12	3.50551e-11	5.64594e-09	9.22348e-12	3.36704e-10	2.28484e-12	7.01102e-15	5.64312e-09	9.22256e-12	1.12695e-10	0.00040489	1.2424e-06	71749.3
2022-03-21 13:34:17	8525365	2.28437e-11	3.42258e-11	5.62898e-09	2.23384e-11	3.33902e-10	1.48027e-11	6.84516e-15	5.62617e-09	2.23362e-11	1.11757e-10	0.00263105	1.21667e-06	467645
2022-03-21 13:34:48	8556071	2.36822e-11	4.42796e-11	5.57857e-09	-2.67782e-11	3.32643e-10	1.53461e-11	8.85592e-15	5.57578e-09	-2.67755e-11	1.11336e-10	0.00275227	1.58828e-06	493612
2022-03-21 13:35:18	8586778	2.94442e-11	9.25522e-12	5.59536e-09	2.27577e-11	2.97881e-10	1.90798e-11	1.85104e-15	5.59256e-09	2.27554e-11	9.97008e-11	0.00341165	3.30983e-07	610033
2022-03-21 13:35:49	8617485	3.95384e-11	2.99566e-11	5.58432e-09	1.94144e-11	3.20364e-10	2.56209e-11	5.99132e-15	5.58153e-09	1.94125e-11	1.07226e-10	0.0045903	1.07342e-06	822409
2022-03-21 13:36:20	8648192	1.59637e-11	4.42387e-11	5.55497e-09	-6.22424e-12	3.20495e-10	1.03445e-11	8.84774e-15	5.55219e-09	-6.22362e-12	1.0727e-10	0.00186313	1.59356e-06	335567
2022-03-21 13:36:50	8678900	4.33654e-11	3.77785e-11	5.53792e-09	4.71924e-12	3.20679e-10	2.81008e-11	7.5557e-15	5.53515e-09	4.71877e-12	1.07331e-10	0.00507679	1.36504e-06	917190
2022-03-21 13:37:21	8709606	3.45181e-11	2.64756e-11	5.54202e-09	-1.33729e-11	3.15296e-10	2.23677e-11	5.29512e-15	5.53925e-09	-1.33716e-11	1.0553e-10	0.00403804	9.55927e-07	728988
2022-03-21 13:37:52	8740313	1.99304e-11	4.0338e-11	5.55672e-09	3.52491e-11	3.14214e-10	1.29149e-11	8.0676e-15	5.55394e-09	3.52456e-11	1.05167e-10	0.00232536	1.45259e-06	418686
2022-03-21 13:38:23	8771020	1.56089e-11	4.15358e-11	5.52441e-09	-3.01967e-11	3.09116e-10	1.01146e-11	8.30716e-15	5.52165e-09	-3.01937e-11	1.03461e-10	0.0018318	1.50447e-06	331749
2022-03-21 13:38:52	8800687	2.89282e-11	4.12696e-11	5.19336e-09	-6.35324e-12	3.11304e-10	1.87455e-11	8.25392e-15	5.19076e-09	-6.3526e-12	1.04193e-10	0.00361131	1.59012e-06	695719
2022-03-21 13:39:23	8831395	2.41659e-11	3.86999e-11	5.31142e-09	9.72873e-12	3.07756e-10	1.56595e-11	7.73998e-15	5.30876e-09	9.72776e-12	1.03006e-10	0.00294975	1.45796e-06	555637
2022-03-21 13:39:54	8862101	3.18844e-11	5.17125e-11	5.55153e-09	2.34242e-11	3.10904e-10	2.06611e-11	1.03425e-14	5.54875e-09	2.34219e-11	1.0406e-10	0.00372355	1.86393e-06	671061
2022-03-21 13:40:24	8892808	3.40989e-11	2.75507e-11	1.12874e-07	1.27924e-12	3.32681e-10	2.20961e-11	5.51014e-15	1.12818e-07	1.27911e-12	1.11348e-10	0.000195857	4.88412e-08	1736.05
2022-03-21 13:40:56	8924016	1.49317e-11	2.50526e-11	2.78962e-07	-2.01239e-11	2.98481e-10	9.67574e-12	5.01052e-15	2.78823e-07	-2.01219e-11	9.99016e-11	3.47022e-05	1.79703e-08	124.46
2022-03-21 13:41:24	8952123	2.82617e-11	2.54826e-11	3.46866e-07	-8.75048e-12	2.86556e-10	1.83136e-11	5.09652e-15	3.46693e-07	-8.7496e-12	9.59103e-11	5.28237e-05	1.47004e-08	152.365
2022-03-21 13:41:52	8980230	1.69419e-11	2.95164e-11	3.51883e-07	-2.65524e-12	2.61386e-10	1.09784e-11	5.90328e-15	3.51707e-07	-2.65497e-12	8.74859e-11	3.12145e-05	1.67847e-08	88.7513
2022-03-21 13:42:20	9008337	1.11466e-10	3.64168e-11	3.60662e-07	3.88826e-11	1.23164e-09	7.223e-11	7.28336e-15	3.60482e-07	3.88787e-11	4.1223e-10	0.000200371	2.02045e-08	555.842
2022-03-21 13:42:53	9041775	7.46891e-09	3.16663e-11	3.29666e-07	1.45393e-10	1.73495e-09	4.83985e-09	6.33326e-15	3.29501e-07	1.45378e-10	5.80688e-10	0.0146884	1.92208e-08	44577.8
2022-03-21 13:43:14	9062211	9.94893e-09	2.53392e-11	3.34592e-07	1.22023e-10	1.44574e-09	6.44691e-09	5.06784e-15	3.34425e-07	1.22011e-10	4.83889e-10	0.0192776	1.51539e-08	57644.1
2022-03-21 13:43:37	9085238	1.12565e-08	4.03585e-11	3.32263e-07	9.24606e-11	1.0812e-09	7.29421e-09	8.0717e-15	3.32097e-07	9.24514e-11	3.61878e-10	0.0219641	2.43053e-08	66137.7
2022-03-21 13:43:56	9104615	1.15951e-08	2.98951e-11	3.29128e-07	8.73543e-11	8.78593e-10	7.51362e-09	5.97902e-15	3.28963e-07	8.73456e-11	2.94065e-10	0.0228403	1.81753e-08	69431.1
2022-03-21 13:44:15	9123991	1.18746e-08	2.9025e-11	3.28233e-07	1.035e-10	7.35257e-10	7.69474e-09	5.805e-15	3.28069e-07	1.0349e-10	2.46091e-10	0.0234546	1.76945e-08	71493.1
2022-03-21 13:44:35	9143366	1.1366e-08	4.22423e-11	3.66843e-07	5.87164e-11	6.04525e-10	7.36517e-09	8.44846e-15	3.6666e-07	5.87105e-11	2.02335e-10	0.0200872	2.30417e-08	54784.4
2022-03-21 13:44:57	9165333	5.53385e-09	3.00078e-11	3.08076e-07	4.35051e-11	4.75064e-10	3.58593e-09	6.00156e-15	3.07922e-07	4.35007e-11	1.59004e-10	0.0116456	1.94905e-08	37820
2022-03-21 13:45:18	9186810	2.69247e-09	2.9885e-11	3.1148e-07	2.20912e-11	4.14611e-10	1.74472e-09	5.977e-15	3.11324e-07	2.2089e-11	1.3877e-10	0.00560419	1.91986e-08	18001.1
2022-03-21 13:45:40	9208286	1.42004e-09	4.14847e-11	3.32801e-07	1.21797e-11	3.81256e-10	9.20186e-10	8.29694e-15	3.32635e-07	1.21785e-11	1.27606e-10	0.00276636	2.49431e-08	8316.5
2022-03-21 13:46:09	9237303	6.53566e-10	1.77426e-11	3.54212e-07	2.18654e-11	3.2759e-10	4.23511e-10	3.54852e-15	3.54035e-07	2.18632e-11	1.09644e-10	0.00119624	1.00231e-08	3378.88
2022-03-21 13:46:37	9265410	3.35248e-10	2.29742e-11	2.22077e-07	2.14999e-11	5.72152e-10	2.17241e-10	4.59484e-15	2.21966e-07	2.14978e-11	1.91499e-10	0.000978712	2.07007e-08	4409.29
2022-03-21 13:47:05	9293516	1.53155e-10	3.23215e-11	7.10462e-08	4.62249e-12	6.43939e-10	9.92444e-11	6.4643e-15	7.10107e-08	4.62203e-12	2.15526e-10	0.0013976	9.10328e-08	19681.5
2022-03-21 13:47:34	9322645	8.90851e-11	2.74278e-11	2.5576e-08	1.94359e-11	6.06974e-10	5.77271e-11	5.48556e-15	2.55632e-08	1.9434e-11	2.03154e-10	0.00225821	2.14588e-07	88338.3
2022-03-21 13:48:03	9351251	5.96839e-11	5.36782e-11	1.2143e-08	2.96162e-11	5.74525e-10	3.86752e-11	1.07356e-14	1.21369e-08	2.96132e-11	1.92294e-10	0.00318657	8.84543e-07	262552
2022-03-21 13:48:31	9379858	5.47496e-11	4.64399e-11	8.02163e-09	1.68989e-11	5.28615e-10	3.54777e-11	9.28798e-15	8.01762e-09	1.68972e-11	1.76927e-10	0.00442497	1.15845e-06	551906
2022-03-21 13:49:00	9408465	5.44594e-11	4.81496e-11	6.66869e-09	-3.67649e-12	4.91543e-10	3.52897e-11	9.62992e-15	6.66536e-09	-3.67612e-12	1.64519e-10	0.00529449	1.44477e-06	794330
2022-03-21 13:49:32	9440192	2.81434e-11	3.47685e-11	6.22901e-09	-2.38649e-12	4.55277e-10	1.82369e-11	6.9537e-15	6.2259e-09	-2.38625e-12	1.52381e-10	0.0029292	1.1169e-06	470487
2022-03-21 13:50:01	9469860	4.14841e-11	3.32942e-11	6.01611e-09	1.96832e-11	4.29799e-10	2.68817e-11	6.65884e-15	6.0131e-09	1.96812e-11	1.43854e-10	0.00447052	1.10739e-06	743463
2022-03-21 13:50:32	9500566	3.29917e-11	3.04992e-11	5.92926e-09	2.13494e-11	4.14289e-10	2.13786e-11	6.09984e-15	5.9263e-09	2.13473e-11	1.38663e-10	0.00360742	1.02928e-06	608714
2022-03-21 13:51:03	9531273	3.54749e-11	4.65115e-11	5.82469e-09	-3.04869e-11	4.01204e-10	2.29877e-11	9.3023e-15	5.82178e-09	-3.04839e-11	1.34283e-10	0.00394858	1.59785e-06	678242
2022-03-21 13:51:33	9561980	3.38194e-11	4.64194e-11	5.77044e-09	-4.78374e-12	3.8994e-10	2.1915e-11	9.28388e-15	5.76755e-09	-4.78326e-12	1.30513e-10	0.0037997	1.60967e-06	658806
2022-03-21 13:52:04	9592687	4.34514e-11	3.52087e-11	5.76826e-09	7.51423e-12	3.75466e-10	2.81565e-11	7.04174e-15	5.76538e-09	7.51348e-12	1.25668e-10	0.00488372	1.22138e-06	847078
2022-03-21 13:52:32	9620145	3.16587e-11	2.25135e-11	5.68858e-09	6.56824e-12	3.61337e-10	2.05148e-11	4.5027e-15	5.68574e-09	6.56758e-12	1.20939e-10	0.00360812	7.91929e-07	634592
2022-03-21 13:53:02	9650851	3.43139e-11	3.17994e-11	5.68811e-09	6.33174e-12	3.55149e-10	2.22354e-11	6.35988e-15	5.68527e-09	6.33111e-12	1.18868e-10	0.00391106	1.11866e-06	687929
2022-03-21 13:53:32	9680518	1.89952e-11	3.57718e-11	5.66512e-09	-9.92223e-12	3.57429e-10	1.23089e-11	7.15436e-15	5.66229e-09	-9.92124e-12	1.19631e-10	0.00217384	1.26351e-06	383915
2022-03-21 13:53:59	9707975	1.38459e-11	2.34964e-11	5.66072e-09	-9.90073e-12	3.45611e-10	8.97214e-12	4.69928e-15	5.65789e-09	-9.89974e-12	1.15676e-10	0.00158578	8.30571e-07	280277
2022-03-21 13:54:30	9738682	1.34697e-11	3.41849e-11	5.61353e-09	-8.90098e-12	3.3596e-10	8.72837e-12	6.83698e-15	5.61072e-09	-8.90009e-12	1.12446e-10	0.00155566	1.21856e-06	277265
2022-03-21 13:55:01	9769390	2.15752e-11	5.43642e-12	5.60435e-09	2.13279e-11	3.07011e-10	1.39807e-11	1.08728e-15	5.60155e-09	2.13258e-11	1.02757e-10	0.00249587	1.94104e-07	445568
2022-03-21 13:55:32	9800097	2.58859e-11	2.69978e-11	5.60465e-09	1.03414e-11	3.24711e-10	1.67741e-11	5.39956e-15	5.60185e-09	1.03404e-11	1.08681e-10	0.00299438	9.63889e-07	534534
2022-03-21 13:56:02	9830805	1.85759e-11	2.47045e-11	5.5998e-09	3.08202e-11	3.20779e-10	1.20372e-11	4.9409e-15	5.597e-09	3.08171e-11	1.07365e-10	0.00215065	8.82776e-07	384250
2022-03-21 13:56:33	9861511	2.81542e-11	4.14334e-11	5.58113e-09	1.80062e-11	3.17454e-10	1.82439e-11	8.28668e-15	5.57834e-09	1.80044e-11	1.06252e-10	0.00327049	1.48551e-06	586284
2022-03-21 13:57:03	9891178	2.66599e-11	2.7264e-11	5.55497e-09	7.48198e-12	3.21432e-10	1.72756e-11	5.4528e-15	5.55219e-09	7.48123e-12	1.07583e-10	0.00311149	9.82099e-07	560408
2022-03-21 13:57:33	9921885	3.01322e-11	5.39444e-11	5.57531e-09	5.26749e-12	3.22614e-10	1.95257e-11	1.07889e-14	5.57252e-09	5.26696e-12	1.07979e-10	0.00350392	1.93609e-06	628785
2022-03-21 13:58:04	9952592	1.28569e-11	5.35144e-11	5.52753e-09	-1.05994e-11	3.21486e-10	8.33127e-12	1.07029e-14	5.52477e-09	-1.05983e-11	1.07601e-10	0.00150799	1.93725e-06	272950
2022-03-21 13:58:35	9983300	3.48944e-11	3.66318e-11	5.56091e-09	2.68319e-11	3.13009e-10	2.26116e-11	7.32636e-15	5.55813e-09	2.68292e-11	1.04764e-10	0.0040682	1.31813e-06	731937
2022-03-21 13:59:02	10010756	2.26932e-11	3.5823e-11	5.53458e-09	-1.14809e-11	3.12433e-10	1.47052e-11	7.1646e-15	5.53181e-09	-1.14798e-11	1.04571e-10	0.0026583	1.29516e-06	480547
2022-03-21 13:59:33	10041463	2.33167e-11	4.3737e-11	6.26073e-09	5.70824e-12	3.06674e-10	1.51092e-11	8.7474e-15	6.2576e-09	5.70767e-12	1.02644e-10	0.00241454	1.39788e-06	385857
2022-03-21 14:00:04	10072170	2.67674e-11	4.5969e-11	5.16443e-09	1.05672e-11	3.05146e-10	1.73453e-11	9.1938e-15	5.16185e-09	1.05661e-11	1.02132e-10	0.00336028	1.78111e-06	650985
2022-03-21 14:00:31	10099627	4.38599e-12	3.80856e-11	5.38614e-09	-2.30049e-12	3.08586e-10	2.84212e-12	7.61712e-15	5.38345e-09	-2.30026e-12	1.03284e-10	0.000527937	1.41492e-06	98066.7
2022-03-21 14:01:02	10130335	2.08442e-11	3.43896e-11	5.69009e-09	9.40623e-12	3.20334e-10	1.3507e-11	6.87792e-15	5.68724e-09	9.40529e-12	1.07216e-10	0.00237497	1.20936e-06	417596
2022-03-21 14:01:33	10161041	4.28924e-11	4.87434e-11	2.19031e-07	-1.58132e-11	3.16856e-10	2.77943e-11	9.74868e-15	2.18921e-07	-1.58116e-11	1.06052e-10	0.00012696	4.45305e-08	579.934
2022-03-21 14:02:05	10193290	2.38112e-11	3.63349e-11	3.14616e-07	3.70874e-12	2.87485e-10	1.54297e-11	7.26698e-15	3.14459e-07	3.70837e-12	9.62212e-11	4.90674e-05	2.31095e-08	156.038
2022-03-21 14:02:33	10221396	3.65929e-11	2.61173e-11	3.40416e-07	7.84748e-13	2.66906e-10	2.37122e-11	5.22346e-15	3.40246e-07	7.8467e-13	8.93334e-11	6.96914e-05	1.5352e-08	204.827
2022-03-21 14:02:58	10246253	1.16852e-11	1.55107e-11	3.73293e-07	4.49349e-12	2.5191e-10	7.57201e-12	3.10214e-15	3.73106e-07	4.49304e-12	8.43143e-11	2.02945e-05	8.31436e-09	54.3934
2022-03-21 14:03:26	10274360	9.5463e-10	3.6468e-11	3.44626e-07	9.13533e-11	1.57745e-09	6.186e-10	7.2936e-15	3.44454e-07	9.13442e-11	5.27973e-10	0.00179589	2.11744e-08	5213.73
2022-03-21 14:03:59	10307797	8.40242e-09	3.73996e-11	3.32801e-07	1.18088e-10	1.66334e-09	5.44477e-09	7.47992e-15	3.32635e-07	1.18076e-10	5.5672e-10	0.0163686	2.24869e-08	49209
2022-03-21 14:04:21	10329275	1.04842e-08	3.76044e-11	3.35758e-07	1.03769e-10	1.37779e-09	6.79376e-09	7.52088e-15	3.3559e-07	1.03759e-10	4.61146e-10	0.0202442	2.24109e-08	60324.3
2022-03-21 14:04:41	10349051	1.13398e-08	5.04123e-11	3.31547e-07	1.17594e-10	1.04859e-09	7.34819e-09	1.00825e-14	3.31381e-07	1.17582e-10	3.50963e-10	0.0221744	3.04256e-08	66915.2
2022-03-21 14:05:00	10368426	1.17429e-08	3.85566e-11	3.29128e-07	8.49463e-11	8.56529e-10	7.6094e-09	7.71132e-15	3.28963e-07	8.49378e-11	2.8668e-10	0.0231314	2.34413e-08	70316.2
2022-03-21 14:05:19	10387803	1.1956e-08	4.27951e-11	3.28859e-07	1.11015e-10	7.18393e-10	7.74749e-09	8.55902e-15	3.28695e-07	1.11004e-10	2.40446e-10	0.0235705	2.60394e-08	71709.4
2022-03-21 14:05:39	10407179	1.07169e-08	3.88944e-11	3.77503e-07	7.72386e-11	5.55889e-10	6.94455e-09	7.77888e-15	3.77314e-07	7.72309e-11	1.86056e-10	0.0184052	2.06164e-08	48779.5
2022-03-21 14:06:01	10429145	4.89225e-09	3.22601e-11	3.07808e-07	3.12609e-11	4.60276e-10	3.17018e-09	6.45202e-15	3.07654e-07	3.12578e-11	1.54054e-10	0.0103044	2.09717e-08	33493.3
2022-03-21 14:06:22	10450621	2.40566e-09	2.43666e-11	3.14078e-07	4.89124e-12	4.08944e-10	1.55887e-09	4.87332e-15	3.13921e-07	4.89075e-12	1.36874e-10	0.0049658	1.5524e-08	15818.6
2022-03-21 14:06:44	10472098	1.27533e-09	2.79909e-11	3.37459e-07	4.46124e-12	3.72371e-10	8.26414e-10	5.59818e-15	3.3729e-07	4.46079e-12	1.24633e-10	0.00245016	1.65975e-08	7264.24
2022-03-21 14:07:09	10497865	6.36979e-10	1.45175e-11	3.55645e-07	-1.85974e-12	3.31729e-10	4.12762e-10	2.9035e-15	3.55467e-07	-1.85955e-12	1.1103e-10	0.00116118	8.16812e-09	3266.64
2022-03-21 14:07:37	10525971	3.39161e-10	4.1157e-11	2.19837e-07	-5.43949e-12	5.80529e-10	2.19776e-10	8.2314e-15	2.19727e-07	-5.43895e-12	1.94303e-10	0.00100022	3.74619e-08	4552.12
2022-03-21 14:08:06	10554078	1.51521e-10	2.89226e-11	7.01179e-08	-6.66498e-12	6.43931e-10	9.81856e-11	5.78452e-15	7.00828e-08	-6.66431e-12	2.15524e-10	0.00140099	8.25383e-08	19990.5
2022-03-21 14:08:35	10583205	8.59461e-11	2.29947e-11	2.53498e-08	-1.98337e-11	5.928e-10	5.56931e-11	4.59894e-15	2.53371e-08	-1.98317e-11	1.9841e-10	0.00219808	1.8151e-07	86753.4
2022-03-21 14:09:03	10611811	6.59404e-11	3.66625e-11	1.20483e-08	-1.05349e-11	5.54929e-10	4.27294e-11	7.3325e-15	1.20423e-08	-1.05338e-11	1.85735e-10	0.00354828	6.08897e-07	294652
2022-03-21 14:09:32	10640420	5.49216e-11	4.6317e-11	8.03731e-09	-1.39104e-11	5.24169e-10	3.55892e-11	9.2634e-15	8.03329e-09	-1.3909e-11	1.75439e-10	0.00443021	1.15313e-06	551482
2022-03-21 14:10:01	10669026	3.87859e-11	3.97544e-11	6.68263e-09	3.25724e-12	4.83311e-10	2.51333e-11	7.95088e-15	6.67929e-09	3.25691e-12	1.61764e-10	0.00376287	1.19038e-06	563363
2022-03-21 14:10:32	10700755	3.11534e-11	4.57744e-11	6.18977e-09	-3.58404e-11	4.50946e-10	2.01874e-11	9.15488e-15	6.18668e-09	-3.58368e-11	1.50932e-10	0.00326305	1.47977e-06	527431
2022-03-21 14:11:03	10731461	3.71949e-11	4.42591e-11	6.0181e-09	-1.54584e-11	4.34852e-10	2.41023e-11	8.85182e-15	6.01509e-09	-1.54569e-11	1.45545e-10	0.00400697	1.4716e-06	666153
2022-03-21 14:11:34	10762168	2.92077e-11	3.23113e-11	5.93129e-09	-1.15024e-12	3.99531e-10	1.89266e-11	6.46226e-15	5.92832e-09	-1.15012e-12	1.33723e-10	0.00319257	1.09007e-06	538528
2022-03-21 14:12:04	10792875	4.32256e-11	3.72972e-11	5.87804e-09	3.13899e-12	4.03899e-10	2.80102e-11	7.45944e-15	5.8751e-09	3.13868e-12	1.35185e-10	0.00476761	1.26967e-06	811494
2022-03-21 14:12:32	10820332	3.91729e-11	4.02356e-11	5.77579e-09	-1.40717e-11	3.95069e-10	2.5384e-11	8.04712e-15	5.7729e-09	-1.40703e-11	1.3223e-10	0.0043971	1.39395e-06	761680
2022-03-21 14:13:03	10851040	1.63507e-11	2.37318e-11	5.7633e-09	-1.10939e-11	3.69499e-10	1.05953e-11	4.74636e-15	5.76042e-09	-1.10928e-11	1.23671e-10	0.00183932	8.23961e-07	319303
2022-03-21 14:13:33	10881746	3.31959e-11	2.67521e-11	5.72283e-09	3.80549e-12	3.5878e-10	2.15109e-11	5.35042e-15	5.71997e-09	3.80511e-12	1.20084e-10	0.00376068	9.35393e-07	657464
2022-03-21 14:14:04	10912453	3.12502e-11	4.29282e-11	5.68398e-09	2.49507e-11	3.6242e-10	2.02501e-11	8.58564e-15	5.68114e-09	2.49482e-11	1.21302e-10	0.00356445	1.51125e-06	627418
2022-03-21 14:14:35	10943160	1.63722e-11	3.83006e-11	5.66709e-09	2.22417e-11	3.58135e-10	1.06092e-11	7.66012e-15	5.66426e-09	2.22395e-11	1.19868e-10	0.00187301	1.35236e-06	330671
2022-03-21 14:15:02	10970617	2.56387e-11	3.77375e-11	5.66882e-09	1.01802e-11	3.42963e-10	1.66139e-11	7.5475e-15	5.66599e-09	1.01792e-11	1.1479e-10	0.00293221	1.33207e-06	517512
2022-03-21 14:15:33	11001325	2.94872e-11	4.18123e-11	5.63551e-09	-1.03092e-11	3.41626e-10	1.91077e-11	8.36246e-15	5.63269e-09	-1.03082e-11	1.14342e-10	0.00339229	1.48463e-06	602250
2022-03-21 14:16:04	11032031	2.20052e-11	4.22525e-11	5.6297e-09	2.48002e-11	3.34984e-10	1.42594e-11	8.4505e-15	5.62689e-09	2.47977e-11	1.12119e-10	0.00253415	1.50181e-06	450365
2022-03-21 14:16:34	11062738	2.98204e-11	4.33991e-11	5.57869e-09	-2.81649e-12	3.30231e-10	1.93236e-11	8.67982e-15	5.5759e-09	-2.81621e-12	1.10528e-10	0.00346556	1.55667e-06	621525
2022-03-21 14:17:05	11093445	2.83584e-11	4.15563e-11	5.59055e-09	-1.12874e-11	3.25647e-10	1.83762e-11	8.31126e-15	5.58775e-09	-1.12863e-11	1.08994e-10	0.00328866	1.48741e-06	588548
2022-03-21 14:17:36	11124152	1.59959e-11	5.01153e-11	5.56863e-09	7.47123e-12	3.30055e-10	1.03653e-11	1.00231e-14	5.56585e-09	7.47048e-12	1.10469e-10	0.00186231	1.80082e-06	334596
2022-03-21 14:18:06	11154860	2.76597e-11	2.46123e-11	5.58938e-09	-8.68598e-12	3.19589e-10	1.79235e-11	4.92246e-15	5.58659e-09	-8.68511e-12	1.06966e-10	0.00320831	8.81121e-07	574288
2022-03-21 14:18:37	11185566	1.37922e-11	3.26491e-11	5.55953e-09	-1.90489e-11	3.12064e-10	8.93735e-12	6.52982e-15	5.55675e-09	-1.9047e-11	1.04448e-10	0.00160838	1.17511e-06	289445
2022-03-21 14:19:08	11216273	2.92614e-11	2.88713e-11	5.54259e-09	8.66448e-12	3.00031e-10	1.89614e-11	5.77426e-15	5.53982e-09	8.66361e-12	1.0042e-10	0.00342275	1.04232e-06	617844
2022-03-21 14:19:38	11246980	2.56064e-11	3.71437e-11	5.52423e-09	-3.41419e-11	3.07634e-10	1.65929e-11	7.42874e-15	5.52147e-09	-3.41385e-11	1.02965e-10	0.00300517	1.34543e-06	544270
2022-03-21 14:20:09	11277687	1.38352e-11	4.63477e-11	5.50616e-09	-3.54964e-11	3.09461e-10	8.96521e-12	9.26954e-15	5.50341e-09	-3.54929e-11	1.03577e-10	0.00162903	1.68433e-06	296004
2022-03-21 14:20:37	11305145	1.55659e-11	3.41849e-11	6.02278e-09	-2.71114e-11	2.97728e-10	1.00867e-11	6.83698e-15	6.01977e-09	-2.71087e-11	9.96496e-11	0.0016756	1.13575e-06	278349
2022-03-21 14:21:07	11335851	1.50499e-11	4.19658e-11	5.09818e-09	1.50499e-13	3.00147e-10	9.75234e-12	8.39316e-15	5.09563e-09	1.50484e-13	1.00459e-10	0.00191386	1.64713e-06	375589
2022-03-21 14:21:38	11366558	2.69609e-11	4.06042e-11	5.46329e-09	1.41684e-11	3.09837e-10	1.74707e-11	8.12084e-15	5.46056e-09	1.4167e-11	1.03702e-10	0.00319943	1.48718e-06	585916
2022-03-21 14:22:09	11397265	3.96136e-11	3.9908e-11	1.56389e-08	-3.59049e-12	3.42256e-10	2.56696e-11	7.9816e-15	1.56311e-08	-3.59013e-12	1.14553e-10	0.00164222	5.10624e-07	105061
2022-03-21 14:22:40	11428992	1.66087e-11	2.07116e-11	2.28437e-07	2.24889e-11	3.07396e-10	1.07624e-11	4.14232e-15	2.28323e-07	2.24867e-11	1.02885e-10	4.71369e-05	1.81424e-08	206.449
2022-03-21 14:23:10	11458120	3.08632e-11	3.11851e-11	3.21066e-07	6.13824e-12	2.86103e-10	1.99994e-11	6.23702e-15	3.20905e-07	6.13763e-12	9.57587e-11	6.23216e-05	1.94357e-08	194.206
2022-03-21 14:23:38	11486226	3.01752e-11	3.79832e-11	3.64424e-07	3.16049e-12	2.78271e-10	1.95535e-11	7.59664e-15	3.64242e-07	3.16017e-12	9.31373e-11	5.36828e-05	2.0856e-08	147.382
2022-03-21 14:24:06	11514333	8.97623e-12	2.55951e-11	3.71322e-07	2.44024e-12	3.4198e-10	5.8166e-12	5.11902e-15	3.71136e-07	2.44e-12	1.14461e-10	1.56724e-05	1.37928e-08	42.2281
2022-03-21 14:24:34	11542440	3.49309e-09	3.24444e-11	3.5242e-07	8.37531e-11	1.64316e-09	2.26352e-09	6.48888e-15	3.52244e-07	8.37447e-11	5.49966e-10	0.00642601	1.84216e-08	18243.1
2022-03-21 14:25:07	11575878	9.27085e-09	3.73382e-11	3.35041e-07	1.04898e-10	1.53275e-09	6.00751e-09	7.46764e-15	3.34873e-07	1.04888e-10	5.13011e-10	0.0179396	2.22999e-08	53571.4
2022-03-21 14:25:30	11598905	1.09736e-08	4.32661e-11	3.3513e-07	1.29204e-10	1.22605e-09	7.11089e-09	8.65322e-15	3.34962e-07	1.29191e-10	4.10359e-10	0.0212289	2.58334e-08	63377
2022-03-21 14:25:47	11615031	1.14366e-08	3.65806e-11	3.31637e-07	1.05618e-10	9.6505e-10	7.41092e-09	7.31612e-15	3.31471e-07	1.05607e-10	3.23002e-10	0.0223577	2.20717e-08	67449.8
2022-03-21 14:26:06	11634406	1.1747e-08	2.66394e-11	3.29576e-07	1.37202e-10	8.004e-10	7.61206e-09	5.32788e-15	3.29411e-07	1.37188e-10	2.67894e-10	0.0231081	1.61739e-08	70149.6
2022-03-21 14:26:25	11653783	1.196e-08	2.86461e-11	3.30383e-07	1.0206e-10	6.67512e-10	7.75008e-09	5.72922e-15	3.30218e-07	1.0205e-10	2.23416e-10	0.0234696	1.73498e-08	71073.1
2022-03-21 14:26:45	11673159	9.7771e-09	3.69799e-11	3.18288e-07	8.14203e-11	5.28116e-10	6.33556e-09	7.39598e-15	3.18129e-07	8.14122e-11	1.7676e-10	0.0199151	2.32484e-08	62600.7
2022-03-21 14:27:07	11695125	4.0417e-09	3.01409e-11	3.08524e-07	2.75522e-11	4.3605e-10	2.61902e-09	6.02818e-15	3.0837e-07	2.75494e-11	1.45946e-10	0.00849312	1.95485e-08	27542
2022-03-21 14:27:28	11716601	2.01622e-09	3.79934e-11	3.22499e-07	1.42222e-11	4.00606e-10	1.30651e-09	7.59868e-15	3.22338e-07	1.42208e-11	1.34083e-10	0.00405323	2.35737e-08	12574.5
2022-03-21 14:27:50	11738078	1.11336e-09	2.48273e-11	3.43641e-07	1.19432e-11	3.63718e-10	7.21457e-10	4.96546e-15	3.43469e-07	1.1942e-11	1.21736e-10	0.0021005	1.44568e-08	6115.54
2022-03-21 14:28:19	11767095	5.17977e-10	3.44613e-11	3.55466e-07	9.44923e-12	3.81693e-10	3.35649e-10	6.89226e-15	3.55288e-07	9.44829e-12	1.27753e-10	0.000944723	1.93991e-08	2659.03
2022-03-21 14:28:47	11795202	1.829e-10	2.65064e-11	1.81585e-07	-4.80524e-12	6.35454e-10	1.18519e-10	5.30128e-15	1.81494e-07	-4.80476e-12	2.12686e-10	0.000653019	2.92091e-08	3598.02
2022-03-21 14:29:15	11823310	1.35901e-10	2.62094e-11	5.29145e-08	-1.19324e-11	6.54996e-10	8.80638e-11	5.24188e-15	5.2888e-08	-1.19312e-11	2.19227e-10	0.0016651	9.91128e-08	31483.5
2022-03-21 14:29:44	11852437	8.22373e-11	3.00794e-11	1.80969e-08	1.40072e-11	5.82986e-10	5.32898e-11	6.01588e-15	1.80879e-08	1.40058e-11	1.95125e-10	0.00294616	3.32592e-07	162881
2022-03-21 14:30:09	11877794	6.63166e-11	3.42566e-11	1.35365e-08	1.54799e-12	5.94789e-10	4.29732e-11	6.85132e-15	1.35297e-08	1.54784e-12	1.99076e-10	0.0031762	5.0639e-07	234757
2022-03-21 14:30:38	11906400	6.35431e-11	2.39775e-11	2.24943e-07	1.18679e-11	5.26971e-10	4.11759e-11	4.7955e-15	2.24831e-07	1.18667e-11	1.76377e-10	0.000183142	2.13294e-08	814.578
2022-03-21 14:31:07	11935527	3.93126e-11	1.91861e-11	3.16318e-07	6.22424e-12	4.72484e-10	2.54746e-11	3.83722e-15	3.1616e-07	6.22362e-12	1.5814e-10	8.0575e-05	1.2137e-08	254.855
2022-03-21 14:31:32	11960383	3.31529e-11	2.22269e-11	3.43641e-07	-7.63248e-12	4.21614e-10	2.14831e-11	4.44538e-15	3.43469e-07	-7.63172e-12	1.41114e-10	6.25473e-05	1.29426e-08	182.105
2022-03-21 14:32:00	11988490	2.37144e-11	2.48375e-11	3.75532e-07	-3.12824e-12	3.89694e-10	1.53669e-11	4.9675e-15	3.75344e-07	-3.12793e-12	1.30431e-10	4.09409e-05	1.32345e-08	109.076
2022-03-21 14:32:28	12016597	1.36789e-09	3.17994e-11	3.57167e-07	6.76926e-11	6.64986e-10	8.86393e-10	6.35988e-15	3.56988e-07	6.76858e-11	2.22571e-10	0.00248297	1.78154e-08	6955.33
2022-03-21 14:33:02	12050035	9.1993e-09	2.71002e-11	3.38087e-07	1.15003e-10	6.8634e-10	5.96115e-09	5.42004e-15	3.37918e-07	1.14991e-10	2.29718e-10	0.0176408	1.60395e-08	52204.4
2022-03-21 14:33:25	12073063	1.12087e-08	3.10111e-11	3.39341e-07	9.9878e-11	6.14884e-10	7.26324e-09	6.20222e-15	3.39171e-07	9.9868e-11	2.05802e-10	0.0214147	1.82864e-08	63138.2
2022-03-21 14:33:44	12092439	1.18994e-08	3.66625e-11	3.34592e-07	1.12337e-10	5.59705e-10	7.71081e-09	7.3325e-15	3.34425e-07	1.12326e-10	1.87333e-10	0.0230569	2.19257e-08	68945.1
2022-03-21 14:34:03	12111815	1.21125e-08	3.76147e-11	3.31905e-07	1.08005e-10	5.11215e-10	7.8489e-09	7.52294e-15	3.31739e-07	1.07994e-10	1.71104e-10	0.0236599	2.26773e-08	71320.7
2022-03-21 14:34:23	12131191	1.22186e-08	3.95701e-11	3.31188e-07	9.93836e-11	4.76861e-10	7.91765e-09	7.91402e-15	3.31022e-07	9.93737e-11	1.59605e-10	0.0239188	2.39078e-08	72257.3
2022-03-21 14:34:42	12150566	1.04093e-08	3.71642e-11	3.39162e-07	7.32503e-11	4.0552e-10	6.74523e-09	7.43284e-15	3.38992e-07	7.3243e-11	1.35728e-10	0.0198979	2.19263e-08	58697.1
2022-03-21 14:35:04	12172534	4.49227e-09	3.22806e-11	3.0942e-07	1.28784e-11	3.66835e-10	2.91099e-09	6.45612e-15	3.09265e-07	1.28771e-11	1.2278e-10	0.0094126	2.08757e-08	30435.4
2022-03-21 14:35:26	12194010	2.24639e-09	1.29921e-11	3.20259e-07	-1.51682e-11	3.35952e-10	1.45566e-09	2.59842e-15	3.20099e-07	-1.51667e-11	1.12443e-10	0.00454753	8.11755e-09	14206.7
2022-03-21 14:35:47	12215486	1.24385e-09	2.24213e-11	3.42924e-07	6.62199e-12	3.1846e-10	8.06015e-10	4.48426e-15	3.42753e-07	6.62133e-12	1.06589e-10	0.00235159	1.30831e-08	6860.91
2022-03-21 14:36:16	12244504	5.92979e-10	4.36961e-11	3.5878e-07	-6.04149e-12	3.09584e-10	3.8425e-10	8.73922e-15	3.58601e-07	-6.04089e-12	1.03618e-10	0.00107153	2.43703e-08	2988.08
2022-03-21 14:36:44	12272610	2.96e-10	2.83492e-11	1.72627e-07	-2.97559e-11	6.07274e-10	1.91808e-10	5.66984e-15	1.72541e-07	-2.97529e-11	2.03255e-10	0.00111167	3.28609e-08	6442.93
2022-03-21 14:37:12	12300717	1.46092e-10	2.78066e-11	5.49883e-08	-1.07929e-11	6.50466e-10	9.46676e-11	5.56132e-15	5.49608e-08	-1.07918e-11	2.17711e-10	0.00172246	1.01187e-07	31339.7
2022-03-21 14:37:41	12329845	8.66448e-11	3.03866e-11	2.09758e-08	3.13899e-12	6.09478e-10	5.61458e-11	6.07732e-15	2.09653e-08	3.13868e-12	2.03992e-10	0.00267803	2.89875e-07	127736
2022-03-21 14:38:10	12358451	6.23714e-11	3.22499e-11	1.08485e-08	-1.00404e-11	5.76905e-10	4.04167e-11	6.44998e-15	1.08431e-08	-1.00394e-11	1.9309e-10	0.00372742	5.94848e-07	343760
2022-03-21 14:38:39	12387058	5.02991e-11	4.19761e-11	7.73721e-09	-1.97799e-11	5.33306e-10	3.25938e-11	8.39522e-15	7.73334e-09	-1.97779e-11	1.78498e-10	0.00421471	1.08559e-06	545005
2022-03-21 14:39:07	12415665	4.44511e-11	4.29896e-11	6.65419e-09	1.43082e-11	4.97716e-10	2.88043e-11	8.59792e-15	6.65086e-09	1.43068e-11	1.66586e-10	0.00433091	1.29275e-06	651181
2022-03-21 14:39:39	12447392	3.36474e-11	3.1697e-11	6.26034e-09	-2.13817e-11	4.66311e-10	2.18035e-11	6.3394e-15	6.25721e-09	-2.13796e-11	1.56074e-10	0.00348454	1.01314e-06	556884
2022-03-21 14:40:10	12478100	5.35779e-11	3.95599e-11	6.0892e-09	-1.40609e-11	4.51039e-10	3.47185e-11	7.91198e-15	6.08616e-09	-1.40595e-11	1.50963e-10	0.0057045	1.3e-06	937291
2022-03-21 14:40:40	12508806	4.68269e-11	2.95164e-11	5.98306e-09	-1.60927e-11	4.30406e-10	3.03438e-11	5.90328e-15	5.98007e-09	-1.60911e-11	1.44057e-10	0.00507416	9.87159e-07	848512
2022-03-21 14:41:11	12539513	3.05944e-11	5.10266e-11	5.92488e-09	-1.11154e-11	4.11455e-10	1.98252e-11	1.02053e-14	5.92192e-09	-1.11143e-11	1.37714e-10	0.00334776	1.72331e-06	565317
2022-03-21 14:41:42	12570220	3.84634e-11	4.53853e-11	5.8787e-09	-7.25623e-12	3.94509e-10	2.49243e-11	9.07706e-15	5.87576e-09	-7.2555e-12	1.32042e-10	0.00424188	1.54483e-06	721929
2022-03-21 14:42:11	12599887	1.20937e-11	3.20349e-11	5.84802e-09	2.88744e-11	3.74106e-10	7.83672e-12	6.40698e-15	5.8451e-09	2.88715e-11	1.25213e-10	0.00134073	1.09613e-06	229378
2022-03-21 14:42:42	12630595	4.69451e-11	5.16306e-11	5.81827e-09	1.73612e-11	3.77669e-10	3.04204e-11	1.03261e-14	5.81536e-09	1.73595e-11	1.26406e-10	0.00523105	1.77566e-06	899522
2022-03-21 14:43:13	12661301	3.60769e-11	2.31073e-11	5.76305e-09	1.95327e-11	3.53904e-10	2.33778e-11	4.62146e-15	5.76017e-09	1.95307e-11	1.18452e-10	0.00405853	8.02313e-07	704586
2022-03-21 14:43:44	12692008	3.79581e-11	3.17585e-11	5.74998e-09	1.26957e-11	3.50157e-10	2.45968e-11	6.3517e-15	5.74711e-09	1.26944e-11	1.17198e-10	0.00427987	1.1052e-06	744700
2022-03-21 14:44:11	12719465	1.33514e-11	3.57309e-11	5.72561e-09	9.56748e-13	3.58312e-10	8.65171e-12	7.14618e-15	5.72275e-09	9.56652e-13	1.19927e-10	0.00151181	1.24873e-06	264176
2022-03-21 14:44:42	12750172	2.77349e-11	5.03918e-11	5.68736e-09	1.16744e-11	3.60976e-10	1.79722e-11	1.00784e-14	5.68452e-09	1.16732e-11	1.20819e-10	0.00316161	1.77295e-06	556179
2022-03-21 14:45:12	12780880	4.35696e-11	3.1523e-11	5.69478e-09	-1.26312e-11	3.39308e-10	2.82331e-11	6.3046e-15	5.69193e-09	-1.26299e-11	1.13566e-10	0.0049602	1.10764e-06	871443
2022-03-21 14:45:43	12811586	2.40584e-11	2.37216e-11	5.67477e-09	6.83698e-12	3.36574e-10	1.55898e-11	4.74432e-15	5.67193e-09	6.8363e-12	1.12651e-10	0.00274859	8.36456e-07	484596
2022-03-21 14:46:14	12842293	2.87347e-11	2.86461e-11	5.65202e-09	-3.95599e-12	3.19658e-10	1.86201e-11	5.72922e-15	5.64919e-09	-3.95559e-12	1.0699e-10	0.00329606	1.01417e-06	583457
2022-03-21 14:46:45	12873000	3.22069e-11	4.86001e-11	5.64081e-09	5.85874e-12	3.2597e-10	2.08701e-11	9.72002e-15	5.63799e-09	5.85815e-12	1.09102e-10	0.00370169	1.72402e-06	656561
2022-03-21 14:47:15	12903707	2.85949e-11	3.63758e-11	5.60945e-09	-2.00917e-11	3.20833e-10	1.85295e-11	7.27516e-15	5.60665e-09	-2.00897e-11	1.07383e-10	0.00330492	1.2976e-06	589464
2022-03-21 14:47:46	12934415	2.48539e-11	3.04685e-11	5.62463e-09	-1.25882e-11	3.17116e-10	1.61053e-11	6.0937e-15	5.62182e-09	-1.25869e-11	1.06139e-10	0.00286479	1.08394e-06	509584
2022-03-21 14:48:17	12965121	4.96111e-11	4.2918e-11	5.597e-09	6.26724e-12	3.21416e-10	3.2148e-11	8.5836e-15	5.5942e-09	6.26661e-12	1.07578e-10	0.00574666	1.53437e-06	1.02725e+06
2022-03-21 14:48:47	12995828	3.07664e-11	2.94345e-11	5.59568e-09	-2.57999e-12	3.1297e-10	1.99366e-11	5.8869e-15	5.59288e-09	-2.57973e-12	1.04751e-10	0.00356464	1.05257e-06	637353
2022-03-21 14:49:18	13026535	3.50771e-11	3.94575e-11	5.58623e-09	6.18124e-12	3.14129e-10	2.273e-11	7.8915e-15	5.58344e-09	6.18062e-12	1.05139e-10	0.00407096	1.41338e-06	729114
2022-03-21 14:49:49	13057242	2.38864e-11	3.77887e-11	5.31331e-09	-2.54559e-11	3.09108e-10	1.54784e-11	7.55774e-15	5.31065e-09	-2.54534e-11	1.03458e-10	0.00291459	1.42313e-06	548820
2022-03-21 14:50:19	13087950	3.33679e-11	3.8321e-11	5.34341e-09	4.07209e-11	3.06751e-10	2.16224e-11	7.6642e-15	5.34074e-09	4.07168e-11	1.0267e-10	0.00404858	1.43505e-06	758056
2022-03-21 14:50:50	13118656	3.10459e-11	4.23242e-11	5.59134e-09	2.59289e-11	3.11872e-10	2.01177e-11	8.46484e-15	5.58854e-09	2.59263e-11	1.04384e-10	0.00359982	1.51468e-06	644142
2022-03-21 14:51:21	13149363	3.36689e-11	3.73075e-11	9.3435e-08	2.66599e-12	3.39376e-10	2.18174e-11	7.4615e-15	9.33883e-08	2.66572e-12	1.13589e-10	0.000233621	7.98976e-08	2501.61
2022-03-21 14:51:53	13181611	2.10484e-11	2.53597e-11	2.79947e-07	-5.52549e-12	3.00277e-10	1.36394e-11	5.07194e-15	2.79807e-07	-5.52494e-12	1.00503e-10	4.87456e-05	1.81266e-08	174.212
2022-03-21 14:52:21	13209718	3.33679e-11	3.04377e-11	3.45163e-07	1.72967e-11	2.9405e-10	2.16224e-11	6.08754e-15	3.4499e-07	1.7295e-11	9.84185e-11	6.26754e-05	1.76455e-08	181.673
2022-03-21 14:52:49	13237825	2.00702e-11	2.54518e-11	3.5672e-07	1.97799e-12	2.58974e-10	1.30055e-11	5.09036e-15	3.56542e-07	1.97779e-12	8.66786e-11	3.64768e-05	1.4277e-08	102.307
2022-03-21 14:53:17	13265932	1.80492e-11	2.17047e-11	3.6962e-07	1.83932e-11	9.90057e-10	1.16959e-11	4.34094e-15	3.69435e-07	1.83914e-11	3.31372e-10	3.16588e-05	1.17502e-08	85.6952
2022-03-21 14:53:51	13299370	6.7318e-09	4.19453e-11	3.32174e-07	1.10821e-10	1.72691e-09	4.36221e-09	8.38906e-15	3.32008e-07	1.1081e-10	5.77997e-10	0.0131389	2.52677e-08	39573.9
2022-03-21 14:54:12	13320846	9.64953e-09	3.65601e-11	3.37191e-07	1.50521e-10	1.4412e-09	6.2529e-09	7.31202e-15	3.37022e-07	1.50506e-10	4.8237e-10	0.0185534	2.16959e-08	55050.8
2022-03-21 14:54:35	13343874	1.11396e-08	4.30409e-11	3.33428e-07	1.2285e-10	1.09613e-09	7.21846e-09	8.60818e-15	3.33261e-07	1.22838e-10	3.66875e-10	0.0216601	2.58301e-08	64994.2
2022-03-21 14:54:55	13363250	1.16019e-08	3.14513e-11	3.31099e-07	1.48253e-10	8.7975e-10	7.51803e-09	6.29026e-15	3.30933e-07	1.48238e-10	2.94452e-10	0.0227177	1.90076e-08	68647.2
2022-03-21 14:55:14	13382626	1.18773e-08	3.44818e-11	3.29576e-07	9.8502e-11	7.42243e-10	7.69649e-09	6.89636e-15	3.29411e-07	9.84921e-11	2.48429e-10	0.0233644	2.09354e-08	70927.7
2022-03-21 14:55:34	13402001	1.16583e-08	4.1761e-11	3.36563e-07	8.61718e-11	6.30632e-10	7.55458e-09	8.3522e-15	3.36395e-07	8.61632e-11	2.11073e-10	0.0224575	2.48286e-08	66759.3
2022-03-21 14:55:55	13423968	5.93375e-09	3.7502e-11	3.08613e-07	1.55122e-11	4.65827e-10	3.84507e-09	7.5004e-15	3.08459e-07	1.55106e-11	1.55912e-10	0.0124654	2.43157e-08	40412
2022-03-21 14:56:17	13445445	2.82256e-09	3.62325e-11	3.11122e-07	-1.12874e-11	4.20509e-10	1.82902e-09	7.2465e-15	3.10966e-07	-1.12863e-11	1.40744e-10	0.00588172	2.33032e-08	18914.3
2022-03-21 14:56:38	13466921	1.46517e-09	4.1372e-11	3.34145e-07	5.63299e-12	3.87375e-10	9.4943e-10	8.2744e-15	3.33978e-07	5.63243e-12	1.29654e-10	0.00284279	2.47753e-08	8511.92
2022-03-21 14:57:07	13495939	6.59145e-10	2.79602e-11	3.55734e-07	8.39573e-12	3.50089e-10	4.27126e-10	5.59204e-15	3.55556e-07	8.39489e-12	1.17175e-10	0.00120129	1.57276e-08	3378.62
2022-03-21 14:57:36	13524045	3.46891e-10	1.85207e-11	2.3641e-07	1.11369e-11	5.48095e-10	2.24785e-10	3.70414e-15	2.36292e-07	1.11358e-11	1.83447e-10	0.000951304	1.56761e-08	4025.97
2022-03-21 14:58:04	13552152	1.82824e-10	3.17277e-11	7.80269e-08	3.07019e-11	6.27376e-10	1.1847e-10	6.34554e-15	7.79879e-08	3.06988e-11	2.09983e-10	0.00151908	8.13657e-08	19478.4
2022-03-21 14:58:32	13580260	9.40731e-11	4.9071e-11	2.72215e-08	2.31124e-11	6.14376e-10	6.09594e-11	9.8142e-15	2.72079e-08	2.31101e-11	2.05632e-10	0.0022405	3.60712e-07	82347.6
2022-03-21 14:59:01	13609387	6.80581e-11	3.31509e-11	1.26233e-08	7.87973e-12	5.52241e-10	4.41016e-11	6.63018e-15	1.2617e-08	7.87894e-12	1.84835e-10	0.00349542	5.25496e-07	277041
2022-03-21 14:59:29	13637995	5.59751e-11	4.23549e-11	8.22713e-09	2.10484e-11	5.23639e-10	3.62719e-11	8.47098e-15	8.22302e-09	2.10463e-11	1.75262e-10	0.00441102	1.03015e-06	536423
2022-03-21 14:59:58	13666601	4.33331e-11	3.35091e-11	6.76728e-09	1.46092e-11	4.85868e-10	2.80798e-11	6.70182e-15	6.7639e-09	1.46077e-11	1.6262e-10	0.00415143	9.90822e-07	613763
2022-03-21 15:00:30	13698330	5.48464e-11	3.96623e-11	6.28479e-09	-1.28569e-11	4.54049e-10	3.55405e-11	7.93246e-15	6.28165e-09	-1.28556e-11	1.5197e-10	0.00565783	1.2628e-06	900691
2022-03-21 15:00:57	13725786	4.13121e-11	3.98875e-11	6.08255e-09	1.55444e-11	4.27856e-10	2.67702e-11	7.9775e-15	6.07951e-09	1.55428e-11	1.43203e-10	0.00440336	1.31219e-06	724295
2022-03-21 15:01:28	13756493	2.99817e-11	3.10009e-11	5.98462e-09	9.25573e-12	4.07839e-10	1.94281e-11	6.20018e-15	5.98163e-09	9.2548e-12	1.36504e-10	0.00324797	1.03654e-06	542991
2022-03-21 15:01:59	13787200	3.72594e-11	3.31406e-11	5.88066e-09	-1.65334e-11	3.95307e-10	2.41441e-11	6.62812e-15	5.87772e-09	-1.65317e-11	1.32309e-10	0.00410773	1.12767e-06	698865
2022-03-21 15:02:29	13817907	3.49266e-11	4.73409e-11	5.82481e-09	2.94764e-11	3.92113e-10	2.26324e-11	9.46818e-15	5.8219e-09	2.94735e-11	1.3124e-10	0.00388747	1.6263e-06	667732
2022-03-21 15:03:00	13848615	2.77887e-11	3.82494e-11	5.79431e-09	1.11047e-11	3.75942e-10	1.80071e-11	7.64988e-15	5.79141e-09	1.11036e-11	1.25828e-10	0.00310927	1.3209e-06	536876
2022-03-21 15:03:31	13879321	3.70659e-11	2.82673e-11	5.75216e-09	-4.48274e-12	3.57966e-10	2.40187e-11	5.65346e-15	5.74928e-09	-4.48229e-12	1.19811e-10	0.00417769	9.83333e-07	726645
2022-03-21 15:04:02	13910028	2.76704e-11	3.23113e-11	5.71598e-09	-4.25699e-12	3.54926e-10	1.79304e-11	6.46226e-15	5.71312e-09	-4.25656e-12	1.18794e-10	0.00313846	1.13113e-06	549343
2022-03-21 15:04:32	13940735	2.15537e-11	4.71258e-11	5.7046e-09	1.00727e-11	3.43461e-10	1.39668e-11	9.42516e-15	5.70175e-09	1.00717e-11	1.14956e-10	0.00244956	1.65303e-06	429616
2022-03-21 15:05:03	13971442	2.95194e-11	3.39187e-11	5.68277e-09	-7.66473e-12	3.41059e-10	1.91286e-11	6.78374e-15	5.67993e-09	-7.66396e-12	1.14152e-10	0.00336775	1.19434e-06	592921
2022-03-21 15:05:34	14002150	1.88339e-11	2.90659e-11	5.64234e-09	1.23624e-11	3.27606e-10	1.22044e-11	5.81318e-15	5.63952e-09	1.23612e-11	1.0965e-10	0.00216408	1.03079e-06	383735
2022-03-21 15:06:04	14032856	2.37252e-11	3.36525e-11	5.64952e-09	3.57974e-12	3.35514e-10	1.53739e-11	6.7305e-15	5.6467e-09	3.57938e-12	1.12297e-10	0.00272264	1.19194e-06	482166
2022-03-21 15:06:35	14063563	3.77754e-11	3.61096e-11	5.61784e-09	5.04174e-12	3.22668e-10	2.44785e-11	7.22192e-15	5.61503e-09	5.04124e-12	1.07997e-10	0.00435945	1.28618e-06	776390
2022-03-21 15:07:06	14094270	1.00404e-11	4.41875e-11	5.62783e-09	1.78127e-11	3.20088e-10	6.50618e-12	8.8375e-15	5.62502e-09	1.78109e-11	1.07133e-10	0.00115665	1.57111e-06	205626
2022-03-21 15:07:36	14124977	3.53351e-11	4.53239e-11	5.59815e-09	-3.76249e-12	3.25939e-10	2.28971e-11	9.06478e-15	5.59535e-09	-3.76211e-12	1.09092e-10	0.00409217	1.62006e-06	731352
2022-03-21 15:08:07	14155685	1.61787e-11	3.47991e-11	5.60909e-09	2.37682e-11	3.19658e-10	1.04838e-11	6.95982e-15	5.60629e-09	2.37658e-11	1.0699e-10	0.00187001	1.24143e-06	333556
2022-03-21 15:08:38	14186391	3.57436e-11	3.36115e-11	5.58332e-09	1.15239e-11	3.04101e-10	2.31619e-11	6.7223e-15	5.58053e-09	1.15227e-11	1.01783e-10	0.00415048	1.2046e-06	743743
2022-03-21 15:09:09	14217098	2.42197e-11	3.93347e-11	5.57518e-09	-2.39724e-12	3.07096e-10	1.56944e-11	7.86694e-15	5.57239e-09	-2.397e-12	1.02785e-10	0.00281645	1.41177e-06	505429
2022-03-21 15:09:39	14247805	2.09624e-11	4.18839e-11	5.58141e-09	8.68598e-12	3.0308e-10	1.35836e-11	8.37678e-15	5.57862e-09	8.68511e-12	1.01441e-10	0.00243495	1.50159e-06	436478
2022-03-21 15:10:10	14278512	3.16694e-11	4.34606e-11	5.59206e-09	2.05217e-11	3.06628e-10	2.05218e-11	8.69212e-15	5.58926e-09	2.05196e-11	1.02628e-10	0.00367164	1.55515e-06	656910
2022-03-21 15:10:41	14309220	2.97237e-11	2.97518e-11	5.49098e-09	-2.87024e-11	2.97551e-10	1.9261e-11	5.95036e-15	5.48823e-09	-2.86995e-11	9.95903e-11	0.0035095	1.0842e-06	639459
2022-03-21 15:11:11	14339926	1.94359e-11	3.1267e-11	5.16628e-09	-1.98014e-11	3.006e-10	1.25945e-11	6.2534e-15	5.1637e-09	-1.97994e-11	1.00611e-10	0.00243904	1.21103e-06	472344
2022-03-21 15:11:42	14370633	3.43891e-11	3.15947e-11	5.51822e-09	-5.07399e-12	3.04232e-10	2.22841e-11	6.31894e-15	5.51546e-09	-5.07348e-12	1.01826e-10	0.0040403	1.14568e-06	732541
2022-03-21 15:12:13	14401340	4.28064e-11	4.06963e-11	3.34778e-08	-2.48647e-11	3.38909e-10	2.77385e-11	8.13926e-15	3.34611e-08	-2.48622e-11	1.13433e-10	0.00082898	2.43246e-07	24774.5
2022-03-21 15:12:45	14433067	1.92747e-11	2.25442e-11	2.48772e-07	6.09524e-12	2.97244e-10	1.249e-11	4.50884e-15	2.48648e-07	6.09463e-12	9.94876e-11	5.02318e-05	1.81335e-08	202.02
2022-03-21 15:13:14	14462195	2.69609e-11	2.2749e-11	3.16945e-07	-1.55552e-11	2.70684e-10	1.74707e-11	4.5498e-15	3.16787e-07	-1.55536e-11	9.05979e-11	5.51496e-05	1.43624e-08	174.091
2022-03-21 15:13:42	14490301	1.08144e-11	2.66599e-11	3.64783e-07	-3.92374e-12	2.70339e-10	7.00773e-12	5.33198e-15	3.64601e-07	-3.92335e-12	9.04825e-11	1.92203e-05	1.46242e-08	52.716
2022-03-21 15:14:10	14518408	1.88124e-11	6.93117e-12	3.62005e-07	1.74687e-11	5.03651e-10	1.21904e-11	1.38623e-15	3.61824e-07	1.7467e-11	1.68572e-10	3.36916e-05	3.83124e-09	93.116
2022-03-21 15:14:38	14546515	4.32204e-09	3.2209e-11	3.26978e-07	8.29253e-11	1.67784e-09	2.80068e-09	6.4418e-15	3.26815e-07	8.2917e-11	5.61573e-10	0.00856964	1.97109e-08	26221.7
2022-03-21 15:15:11	14579953	9.57258e-09	2.77964e-11	3.36384e-07	1.45984e-10	1.43847e-09	6.20303e-09	5.55928e-15	3.36216e-07	1.45969e-10	4.81456e-10	0.0184496	1.65349e-08	54874.1
2022-03-21 15:15:34	14602980	1.09999e-08	3.4359e-11	3.35041e-07	1.21345e-10	1.14698e-09	7.12794e-09	6.8718e-15	3.34873e-07	1.21333e-10	3.83894e-10	0.0212855	2.05206e-08	63562.7
2022-03-21 15:15:51	14619106	1.14688e-08	5.01461e-11	3.31099e-07	1.09628e-10	9.30879e-10	7.43178e-09	1.00292e-14	3.30933e-07	1.09617e-10	3.11565e-10	0.022457	3.03059e-08	67859.7
2022-03-21 15:16:10	14638481	1.17343e-08	3.30894e-11	3.29934e-07	9.72228e-11	7.62021e-10	7.60383e-09	6.61788e-15	3.29769e-07	9.72131e-11	2.55048e-10	0.023058	2.00682e-08	69921.8
2022-03-21 15:16:29	14657858	1.18626e-08	4.23242e-11	3.33608e-07	9.55458e-11	6.73663e-10	7.68696e-09	8.46484e-15	3.33441e-07	9.55362e-11	2.25475e-10	0.0230534	2.53863e-08	69137.9
2022-03-21 15:16:49	14677234	9.1764e-09	2.43359e-11	3.16497e-07	4.58701e-11	5.16621e-10	5.94631e-09	4.86718e-15	3.16339e-07	4.58655e-11	1.72913e-10	0.0187973	1.5386e-08	59421.4
2022-03-21 15:17:07	14695950	3.90621e-09	3.40518e-11	3.07897e-07	4.45801e-11	4.32241e-10	2.53122e-09	6.81036e-15	3.07743e-07	4.45756e-11	1.44671e-10	0.00822512	2.213e-08	26727.2
2022-03-21 15:17:29	14717426	1.9835e-09	3.58639e-11	3.23126e-07	3.30669e-11	3.97219e-10	1.28531e-09	7.17278e-15	3.22964e-07	3.30636e-11	1.32949e-10	0.00397972	2.22092e-08	12322.5
2022-03-21 15:17:50	14738903	1.08506e-09	3.47275e-11	3.45701e-07	6.68004e-11	3.57452e-10	7.03119e-10	6.9455e-15	3.45528e-07	6.67937e-11	1.19639e-10	0.00203491	2.01011e-08	5889.28
2022-03-21 15:18:19	14767920	5.07259e-10	2.11723e-11	3.55555e-07	5.45024e-12	3.7608e-10	3.28704e-10	4.23446e-15	3.55377e-07	5.44969e-12	1.25874e-10	0.000924943	1.19154e-08	2602.71
2022-03-21 15:18:44	14792776	2.60783e-10	3.65396e-11	1.70924e-07	4.64399e-12	5.99449e-10	1.68987e-10	7.30792e-15	1.70839e-07	4.64353e-12	2.00636e-10	0.000989164	4.27768e-08	5790.05
2022-03-21 15:19:12	14820883	1.26774e-10	4.69415e-11	5.43238e-08	3.01322e-11	6.27391e-10	8.21496e-11	9.3883e-15	5.42966e-08	3.01292e-11	2.09988e-10	0.00151298	1.72908e-07	27865
2022-03-21 15:19:42	14850010	7.66151e-11	4.68391e-11	2.06298e-08	1.58024e-12	5.87133e-10	4.96466e-11	9.36782e-15	2.06195e-08	1.58008e-12	1.96513e-10	0.00240775	4.54319e-07	116771
2022-03-21 15:20:10	14878617	4.14304e-11	4.96342e-11	1.06665e-08	1.07499e-12	5.40839e-10	2.68469e-11	9.92684e-15	1.06612e-08	1.07488e-12	1.81019e-10	0.0025182	9.31121e-07	236203
2022-03-21 15:20:39	14907225	5.70931e-11	3.64577e-11	7.64368e-09	6.76173e-12	5.06331e-10	3.69963e-11	7.29154e-15	7.63986e-09	6.76105e-12	1.69469e-10	0.00484254	9.54408e-07	633852
2022-03-21 15:21:07	14935831	4.29031e-11	4.21604e-11	6.54895e-09	-1.76192e-11	4.82551e-10	2.78012e-11	8.43208e-15	6.54568e-09	-1.76174e-11	1.6151e-10	0.00424726	1.28819e-06	648866
2022-03-21 15:21:39	14967560	3.25832e-11	3.90685e-11	6.17709e-09	-7.09498e-12	4.32334e-10	2.11139e-11	7.8137e-15	6.174e-09	-7.09427e-12	1.44702e-10	0.00341981	1.26558e-06	553905
2022-03-21 15:22:07	14995016	2.68319e-11	2.95061e-11	6.0437e-09	-2.31124e-11	4.22819e-10	1.73871e-11	5.90122e-15	6.04068e-09	-2.31101e-11	1.41518e-10	0.00287833	9.76913e-07	476491
2022-03-21 15:22:37	15025723	3.73346e-11	3.20349e-11	5.93024e-09	-4.18174e-12	4.10764e-10	2.41928e-11	6.40698e-15	5.92727e-09	-4.18132e-12	1.37483e-10	0.00408161	1.08093e-06	688615
2022-03-21 15:23:08	15056430	3.44106e-11	1.99437e-11	5.85686e-09	2.96484e-11	3.85655e-10	2.22981e-11	3.98874e-15	5.85393e-09	2.96454e-11	1.29079e-10	0.00380908	6.81378e-07	650687
2022-03-21 15:23:39	15087137	1.79524e-11	2.92194e-11	5.81935e-09	1.13197e-11	3.66175e-10	1.16332e-11	5.84388e-15	5.81644e-09	1.13186e-11	1.22559e-10	0.00200005	1.00472e-06	343861
2022-03-21 15:24:09	15117845	2.28437e-11	3.84951e-11	5.77548e-09	9.18048e-12	3.62144e-10	1.48027e-11	7.69902e-15	5.77259e-09	9.17956e-12	1.2121e-10	0.00256431	1.33372e-06	444222
2022-03-21 15:24:40	15148551	2.76167e-11	4.08499e-11	5.75077e-09	9.06223e-12	3.56208e-10	1.78956e-11	8.16998e-15	5.74789e-09	9.06132e-12	1.19223e-10	0.00311342	1.42139e-06	541663
2022-03-21 15:25:11	15179258	3.44859e-11	4.08191e-11	5.7247e-09	2.73157e-11	3.54043e-10	2.23469e-11	8.16382e-15	5.72184e-09	2.7313e-11	1.18498e-10	0.00390554	1.42678e-06	682567
2022-03-21 15:25:38	15206715	3.55931e-11	3.96623e-11	5.6949e-09	-1.52327e-11	3.44145e-10	2.30643e-11	7.93246e-15	5.69205e-09	-1.52312e-11	1.15185e-10	0.00405202	1.3936e-06	711874
2022-03-21 15:26:09	15237422	3.22392e-11	4.4679e-11	5.67223e-09	2.10914e-11	3.38655e-10	2.0891e-11	8.9358e-15	5.66939e-09	2.10893e-11	1.13348e-10	0.00368487	1.57615e-06	649959
2022-03-21 15:26:40	15268130	1.82749e-11	2.23599e-11	5.66766e-09	2.08764e-11	3.27836e-10	1.18421e-11	4.47198e-15	5.66483e-09	2.08743e-11	1.09727e-10	0.00209047	7.89429e-07	369026
2022-03-21 15:27:10	15298836	2.50797e-11	3.33556e-11	5.6155e-09	1.56197e-11	3.1846e-10	1.62516e-11	6.67112e-15	5.61269e-09	1.56181e-11	1.06589e-10	0.00289552	1.18858e-06	515887
2022-03-21 15:27:41	15329543	2.91539e-11	3.45432e-11	5.63028e-09	-7.64323e-12	3.14184e-10	1.88917e-11	6.90864e-15	5.62746e-09	-7.64247e-12	1.05157e-10	0.00335706	1.22766e-06	596549
2022-03-21 15:28:12	15360250	2.37144e-11	4.3348e-11	5.61032e-09	1.63077e-11	3.14498e-10	1.53669e-11	8.6696e-15	5.60751e-09	1.63061e-11	1.05262e-10	0.00274042	1.54607e-06	488704
2022-03-21 15:28:39	15387706	2.44347e-11	3.33863e-11	5.58736e-09	-1.08789e-11	3.15535e-10	1.58337e-11	6.67726e-15	5.58457e-09	-1.08778e-11	1.0561e-10	0.00283526	1.19566e-06	507695
2022-03-21 15:29:10	15418415	1.20829e-11	3.73177e-11	5.5922e-09	-2.80574e-12	3.16579e-10	7.82972e-12	7.46354e-15	5.5894e-09	-2.80546e-12	1.05959e-10	0.00140081	1.3353e-06	250620
2022-03-21 15:29:41	15449121	1.02662e-11	3.46763e-11	5.5668e-09	-1.23839e-11	3.134e-10	6.6525e-12	6.93526e-15	5.56402e-09	-1.23827e-11	1.04895e-10	0.00119563	1.24645e-06	214886
2022-03-21 15:30:11	15479828	4.87726e-11	3.50551e-11	5.56464e-09	2.11774e-12	3.14506e-10	3.16046e-11	7.01102e-15	5.56186e-09	2.11753e-12	1.05265e-10	0.00568239	1.26055e-06	1.02167e+06
2022-03-21 15:30:42	15510535	3.68079e-11	3.05709e-11	5.56748e-09	7.93348e-12	2.98588e-10	2.38515e-11	6.11418e-15	5.5647e-09	7.93269e-12	9.99374e-11	0.00428622	1.09874e-06	770253
2022-03-21 15:31:13	15541242	1.70387e-11	4.04813e-11	5.55438e-09	2.43702e-11	3.10336e-10	1.10411e-11	8.09626e-15	5.5516e-09	2.43678e-11	1.03869e-10	0.00198881	1.45836e-06	358241
2022-03-21 15:31:43	15571950	2.84229e-11	2.80523e-11	5.35783e-09	-9.01923e-12	2.97613e-10	1.8418e-11	5.61046e-15	5.35515e-09	-9.01833e-12	9.96111e-11	0.00343931	1.04768e-06	642244
2022-03-21 15:32:14	15602656	3.63564e-11	3.89558e-11	5.19986e-09	1.17819e-11	3.0556e-10	2.35589e-11	7.79116e-15	5.19726e-09	1.17807e-11	1.02271e-10	0.00453296	1.49909e-06	872182
2022-03-21 15:32:45	15633363	2.11989e-11	5.11801e-11	5.51923e-09	1.35987e-11	2.91101e-10	1.37369e-11	1.0236e-14	5.51647e-09	1.35973e-11	9.74315e-11	0.00249016	1.85554e-06	451404
2022-03-21 15:33:16	15664070	3.31206e-11	4.33377e-11	5.22096e-08	-1.69634e-11	3.31107e-10	2.14621e-11	8.66754e-15	5.21835e-08	-1.69617e-11	1.10822e-10	0.000411282	1.66097e-07	7881.46
2022-03-21 15:33:47	15695797	3.10137e-11	1.49169e-11	2.62657e-07	5.43949e-12	2.84283e-10	2.00969e-11	2.98338e-15	2.62526e-07	5.43895e-12	9.51495e-11	7.6552e-05	1.13641e-08	291.598
2022-03-21 15:34:16	15724925	1.61572e-11	2.3394e-11	3.24649e-07	-2.17149e-11	2.71798e-10	1.04699e-11	4.6788e-15	3.24487e-07	-2.17127e-11	9.09708e-11	3.22659e-05	1.44191e-08	99.4369
2022-03-21 15:34:45	15753031	5.03099e-12	3.5219e-11	3.65141e-07	-2.10269e-11	2.61854e-10	3.26008e-12	7.0438e-15	3.64958e-07	-2.10248e-11	8.76425e-11	8.93275e-06	1.93003e-08	24.4761
2022-03-21 15:35:13	15781138	1.17174e-11	2.92604e-11	3.75891e-07	4.66549e-12	6.74269e-10	7.59288e-12	5.85208e-15	3.75703e-07	4.66502e-12	2.25678e-10	2.02098e-05	1.55763e-08	53.7919
2022-03-21 15:35:46	15814576	6.39045e-09	3.76966e-11	3.3083e-07	8.59998e-11	1.72489e-09	4.14101e-09	7.53932e-15	3.30665e-07	8.59912e-11	5.77321e-10	0.0125233	2.28005e-08	37873.1
2022-03-21 15:36:08	15836051	9.14864e-09	5.35758e-11	3.35937e-07	1.38255e-10	1.50973e-09	5.92832e-09	1.07152e-14	3.35769e-07	1.38241e-10	5.05307e-10	0.0176559	3.19123e-08	52583.6
2022-03-21 15:36:31	15859080	1.09052e-08	4.55287e-11	3.34862e-07	1.24764e-10	1.16474e-09	7.06657e-09	9.10574e-15	3.34695e-07	1.24752e-10	3.89838e-10	0.0211135	2.72061e-08	63082.9
2022-03-21 15:36:50	15878456	1.14198e-08	3.70413e-11	3.30562e-07	1.03769e-10	9.24971e-10	7.40003e-09	7.40826e-15	3.30397e-07	1.03759e-10	3.09588e-10	0.0223974	2.24223e-08	67789.4
2022-03-21 15:37:09	15897831	1.17296e-08	4.99004e-11	3.2868e-07	9.82225e-11	7.82379e-10	7.60078e-09	9.98008e-15	3.28516e-07	9.82127e-11	2.61862e-10	0.0231367	3.03793e-08	70428.1
2022-03-21 15:37:29	15917208	1.18665e-08	3.28232e-11	3.31368e-07	1.03533e-10	6.63511e-10	7.68949e-09	6.56464e-15	3.31202e-07	1.03523e-10	2.22077e-10	0.0232169	1.98206e-08	70098.9
2022-03-21 15:37:48	15936584	9.32421e-09	4.77299e-11	3.11033e-07	6.93803e-11	5.07484e-10	6.04209e-09	9.54598e-15	3.10877e-07	6.93734e-11	1.69855e-10	0.0194356	3.07066e-08	62518.5
2022-03-21 15:38:10	15958550	3.61835e-09	3.31406e-11	3.0933e-07	1.93822e-11	4.31904e-10	2.34469e-09	6.62812e-15	3.09175e-07	1.93803e-11	1.44558e-10	0.00758369	2.14381e-08	24528.8
2022-03-21 15:38:32	15980026	1.84773e-09	3.32737e-11	3.25724e-07	2.89927e-11	3.92205e-10	1.19733e-09	6.65474e-15	3.25561e-07	2.89898e-11	1.31271e-10	0.00367774	2.04408e-08	11296.6
2022-03-21 15:38:53	16001503	1.01718e-09	2.85642e-11	3.4812e-07	3.36904e-11	3.64216e-10	6.59133e-10	5.71284e-15	3.47946e-07	3.3687e-11	1.21903e-10	0.00189435	1.64188e-08	5444.39
2022-03-21 15:39:22	16030520	4.63883e-10	2.46635e-11	3.47493e-07	1.90597e-11	4.0694e-10	3.00596e-10	4.9327e-15	3.47319e-07	1.90578e-11	1.36203e-10	0.000865475	1.42022e-08	2491.87
2022-03-21 15:39:47	16055376	2.62589e-10	1.42411e-11	1.53456e-07	4.31719e-11	6.02336e-10	1.70158e-10	2.84822e-15	1.53379e-07	4.31676e-11	2.01602e-10	0.00110939	1.85698e-08	7233
2022-03-21 15:40:15	16083483	1.18841e-10	4.44025e-11	4.9077e-08	4.55046e-11	6.25319e-10	7.7009e-11	8.8805e-15	4.90525e-08	4.55e-11	2.09294e-10	0.00156993	1.81041e-07	32005.1
2022-03-21 15:40:44	16112610	6.90901e-11	2.38547e-11	1.90862e-08	4.43436e-11	5.75861e-10	4.47704e-11	4.77094e-15	1.90767e-08	4.43392e-11	1.92741e-10	0.00234687	2.50093e-07	123023
2022-03-21 15:41:13	16141217	4.43114e-11	3.38163e-11	1.01509e-08	1.15777e-11	5.38981e-10	2.87138e-11	6.76326e-15	1.01458e-08	1.15765e-11	1.80397e-10	0.00283011	6.66605e-07	278943
2022-03-21 15:41:41	16169825	5.26211e-11	4.59382e-11	7.31033e-09	2.70147e-11	5.00089e-10	3.40985e-11	9.18764e-15	7.30667e-09	2.7012e-11	1.6738e-10	0.00466676	1.25743e-06	638698
2022-03-21 15:42:13	16201552	5.14494e-11	3.12261e-11	6.44244e-09	-7.21323e-12	4.59178e-10	3.33392e-11	6.24522e-15	6.43922e-09	-7.21251e-12	1.53687e-10	0.00517752	9.69872e-07	804061
2022-03-21 15:42:43	16231220	5.09871e-11	4.43513e-11	6.14651e-09	-1.86512e-11	4.4412e-10	3.30396e-11	8.87026e-15	6.14344e-09	-1.86493e-11	1.48647e-10	0.00537804	1.44386e-06	875412
2022-03-21 15:43:13	16261926	3.91621e-11	3.59766e-11	5.98215e-09	-2.71974e-12	4.13014e-10	2.5377e-11	7.19532e-15	5.97916e-09	-2.71947e-12	1.38236e-10	0.00424425	1.2034e-06	709841
2022-03-21 15:43:44	16292633	3.92159e-11	3.42053e-11	5.89661e-09	8.38498e-12	4.07685e-10	2.54119e-11	6.84106e-15	5.89366e-09	8.38414e-12	1.36452e-10	0.00431173	1.16075e-06	731588
2022-03-21 15:44:15	16323340	2.71222e-11	5.43232e-11	5.79838e-09	-3.89149e-12	3.87206e-10	1.75752e-11	1.08646e-14	5.79548e-09	-3.8911e-12	1.29598e-10	0.00303257	1.87467e-06	523264
2022-03-21 15:44:46	16354047	4.07854e-11	2.14794e-11	5.79661e-09	1.79094e-11	3.66198e-10	2.64289e-11	4.29588e-15	5.79371e-09	1.79076e-11	1.22566e-10	0.00456166	7.41473e-07	787347
2022-03-21 15:45:16	16384755	3.58404e-11	3.17687e-11	5.74135e-09	2.26502e-11	3.58665e-10	2.32246e-11	6.35374e-15	5.73848e-09	2.26479e-11	1.20045e-10	0.00404717	1.10722e-06	705268
2022-03-21 15:45:47	16415461	3.85279e-11	1.51626e-11	5.7452e-09	2.53269e-11	3.41028e-10	2.49661e-11	3.03252e-15	5.74233e-09	2.53244e-11	1.14142e-10	0.00434773	5.28099e-07	757137
2022-03-21 15:46:18	16446168	3.73884e-11	3.68161e-11	5.66869e-09	-1.16529e-11	3.51793e-10	2.42277e-11	7.36322e-15	5.66586e-09	-1.16517e-11	1.17745e-10	0.00427609	1.29958e-06	754711
2022-03-21 15:46:45	16473625	2.98849e-11	3.80549e-11	5.6762e-09	2.99387e-11	3.50288e-10	1.93654e-11	7.61098e-15	5.67336e-09	2.99357e-11	1.17241e-10	0.00341339	1.34153e-06	601653
2022-03-21 15:47:16	16504332	2.62084e-11	3.72051e-11	5.64573e-09	2.13279e-11	3.33119e-10	1.6983e-11	7.44102e-15	5.64291e-09	2.13258e-11	1.11495e-10	0.00300963	1.31865e-06	533347
2022-03-21 15:47:47	16535040	2.77994e-11	3.63349e-11	5.63893e-09	1.46092e-11	3.27682e-10	1.8014e-11	7.26698e-15	5.63611e-09	1.46077e-11	1.09675e-10	0.00319618	1.28936e-06	567089
2022-03-21 15:48:17	16565746	3.03902e-11	3.7369e-11	5.58594e-09	-9.21273e-12	3.25026e-10	1.96928e-11	7.4738e-15	5.58315e-09	-9.21181e-12	1.08786e-10	0.0035272	1.33864e-06	631758
2022-03-21 15:48:45	16593203	3.43569e-11	3.4922e-11	5.63023e-09	1.75547e-11	3.15689e-10	2.22633e-11	6.9844e-15	5.62741e-09	1.75529e-11	1.05661e-10	0.00395622	1.24114e-06	703026
2022-03-21 15:49:15	16623910	2.18117e-11	3.87409e-11	5.58262e-09	-1.12659e-11	3.24074e-10	1.4134e-11	7.74818e-15	5.57983e-09	-1.12648e-11	1.08468e-10	0.00253305	1.38861e-06	453965
2022-03-21 15:49:46	16654617	2.99387e-11	3.80856e-11	5.57109e-09	-7.43898e-12	3.1446e-10	1.94003e-11	7.61712e-15	5.5683e-09	-7.43824e-12	1.0525e-10	0.00348405	1.36794e-06	625694
2022-03-21 15:50:17	16685325	2.96377e-11	5.49785e-11	5.58601e-09	1.93177e-11	3.2448e-10	1.92052e-11	1.09957e-14	5.58322e-09	1.93158e-11	1.08603e-10	0.00343981	1.96942e-06	616099
2022-03-21 15:50:44	16712781	2.80789e-11	3.11135e-11	5.55281e-09	6.00924e-12	3.11327e-10	1.81951e-11	6.2227e-15	5.55003e-09	6.00864e-12	1.04201e-10	0.00327838	1.1212e-06	590696
2022-03-21 15:51:15	16743488	3.09814e-11	3.99796e-11	5.52588e-09	-9.01923e-12	3.13001e-10	2.00759e-11	7.99592e-15	5.52312e-09	-9.01833e-12	1.04761e-10	0.00363489	1.44772e-06	658124
2022-03-21 15:51:46	16774195	3.19274e-11	2.8595e-11	5.54724e-09	-1.25989e-11	3.06481e-10	2.0689e-11	5.719e-15	5.54447e-09	-1.25976e-11	1.02579e-10	0.00373146	1.03148e-06	673006
2022-03-21 15:52:16	16804902	1.72644e-11	4.13209e-11	5.55081e-09	1.39427e-11	3.06374e-10	1.11873e-11	8.26418e-15	5.54803e-09	1.39413e-11	1.02543e-10	0.00201645	1.48957e-06	363453
2022-03-21 15:52:47	16835610	2.27147e-11	3.49937e-11	5.34788e-09	-6.06299e-12	3.006e-10	1.47191e-11	6.99874e-15	5.34521e-09	-6.06238e-12	1.00611e-10	0.00275371	1.30935e-06	515173
2022-03-21 15:53:15	16863066	2.10054e-11	4.12082e-11	5.18946e-09	3.34324e-12	3.03817e-10	1.36115e-11	8.24164e-15	5.18687e-09	3.34291e-12	1.01688e-10	0.00262422	1.58894e-06	505937
2022-03-21 15:53:45	16893772	4.44834e-11	3.59663e-11	5.50876e-09	2.17149e-11	3.01437e-10	2.88252e-11	7.19326e-15	5.50601e-09	2.17127e-11	1.00891e-10	0.00523524	1.30644e-06	950823
2022-03-21 15:54:16	16924480	3.48944e-11	4.0983e-11	4.62528e-08	3.02074e-12	3.37204e-10	2.26116e-11	8.1966e-15	4.62297e-08	3.02044e-12	1.12862e-10	0.000489114	1.77302e-07	10580.1
2022-03-21 15:54:43	16951916	1.89414e-11	2.15102e-11	2.43128e-07	-3.10674e-12	2.96569e-10	1.2274e-11	4.30204e-15	2.43006e-07	-3.10643e-12	9.92616e-11	5.05091e-05	1.77034e-08	207.851
2022-03-21 15:55:13	16981044	2.40799e-11	2.83185e-11	3.19005e-07	-9.10523e-12	2.8006e-10	1.56038e-11	5.6637e-15	3.18845e-07	-9.10432e-12	9.37361e-11	4.89384e-05	1.77631e-08	153.486
2022-03-21 15:55:41	17009152	1.57272e-11	1.87561e-11	3.65051e-07	-1.13949e-12	2.5383e-10	1.01912e-11	3.75122e-15	3.64868e-07	-1.13938e-12	8.49569e-11	2.79312e-05	1.0281e-08	76.5515
2022-03-21 15:56:09	17037258	1.13949e-11	1.86026e-11	3.62543e-07	-7.11648e-12	4.39536e-10	7.3839e-12	3.72052e-15	3.62362e-07	-7.11577e-12	1.47113e-10	2.03771e-05	1.02674e-08	56.2342
2022-03-21 15:56:37	17065364	3.88049e-09	3.55466e-11	3.35041e-07	8.65588e-11	1.64524e-09	2.51456e-09	7.10932e-15	3.34873e-07	8.65501e-11	5.50662e-10	0.00750898	2.12299e-08	22423.3
2022-03-21 15:57:10	17098804	9.38885e-09	4.13209e-11	3.36922e-07	1.24549e-10	1.46409e-09	6.08397e-09	8.26418e-15	3.36754e-07	1.24537e-10	4.90031e-10	0.0180666	2.45407e-08	53649.2
2022-03-21 15:57:33	17121830	1.10234e-08	3.3673e-11	3.34503e-07	1.11584e-10	1.11564e-09	7.14316e-09	6.7346e-15	3.34336e-07	1.11573e-10	3.73405e-10	0.0213652	2.01432e-08	63903.5
2022-03-21 15:57:53	17141206	1.15246e-08	3.66932e-11	3.31278e-07	1.12659e-10	8.99829e-10	7.46794e-09	7.33864e-15	3.31112e-07	1.12648e-10	3.01173e-10	0.0225541	2.21636e-08	68116.1
2022-03-21 15:58:12	17160580	1.18161e-08	3.44409e-11	3.28949e-07	8.43551e-11	7.4165e-10	7.65683e-09	6.88818e-15	3.28785e-07	8.43467e-11	2.4823e-10	0.0232883	2.09504e-08	70831.5
2022-03-21 15:58:31	17179958	1.17242e-08	3.85053e-11	3.34862e-07	1.02597e-10	6.50412e-10	7.59728e-09	7.70106e-15	3.34695e-07	1.02587e-10	2.17693e-10	0.0226991	2.30092e-08	67820.5
2022-03-21 15:58:53	17201924	6.67135e-09	3.12158e-11	3.10405e-07	5.21589e-11	4.78643e-10	4.32303e-09	6.24316e-15	3.1025e-07	5.21537e-11	1.60202e-10	0.013934	2.0123e-08	44912.3
2022-03-21 15:59:15	17223400	3.06905e-09	3.46968e-11	3.09778e-07	5.56311e-11	4.12139e-10	1.98874e-09	6.93936e-15	3.09623e-07	5.56255e-11	1.37943e-10	0.00642311	2.24123e-08	20744.9
2022-03-21 15:59:36	17244876	1.58177e-09	1.26542e-11	3.31547e-07	2.87024e-11	3.78983e-10	1.02499e-09	2.53084e-15	3.31381e-07	2.86995e-11	1.26846e-10	0.00309307	7.63725e-09	9333.89
2022-03-21 15:59:58	17266352	9.25767e-10	2.38035e-11	3.50091e-07	9.59973e-12	3.42026e-10	5.99897e-10	4.7607e-15	3.49916e-07	9.59877e-12	1.14476e-10	0.0017144	1.36053e-08	4899.47
2022-03-21 16:00:27	17295370	4.37363e-10	2.9373e-11	3.15153e-07	1.82749e-11	4.63401e-10	2.83411e-10	5.8746e-15	3.14995e-07	1.82731e-11	1.551e-10	0.000899731	1.86498e-08	2856.33
2022-03-21 16:00:55	17323476	2.09506e-10	3.7031e-11	1.11441e-07	1.36524e-11	6.20788e-10	1.3576e-10	7.4062e-15	1.11385e-07	1.3651e-11	2.07778e-10	0.00121883	6.64917e-08	10942.5
2022-03-21 16:01:23	17351584	1.03479e-10	4.0512e-11	3.67357e-08	5.50399e-12	6.04364e-10	6.70544e-11	8.1024e-15	3.67173e-08	5.50344e-12	2.02281e-10	0.00182623	2.2067e-07	49737.6
2022-03-21 16:01:52	17380712	6.04794e-11	3.53828e-11	1.54234e-08	3.05729e-11	5.64159e-10	3.91907e-11	7.07656e-15	1.54157e-08	3.05698e-11	1.88824e-10	0.00254226	4.59049e-07	164914
2022-03-21 16:02:21	17409320	5.30941e-11	3.88228e-11	9.05067e-09	1.04274e-11	5.17159e-10	3.4405e-11	7.76456e-15	9.04614e-09	1.04264e-11	1.73093e-10	0.00380328	8.58328e-07	420430
2022-03-21 16:02:49	17437926	4.86651e-11	3.54953e-11	6.97879e-09	1.08574e-11	4.87481e-10	3.1535e-11	7.09906e-15	6.9753e-09	1.08563e-11	1.6316e-10	0.00452095	1.01774e-06	648137
2022-03-21 16:03:21	17469656	4.56551e-11	3.77272e-11	6.33377e-09	-1.22119e-11	4.47836e-10	2.95845e-11	7.54544e-15	6.3306e-09	-1.22107e-11	1.49891e-10	0.00467325	1.1919e-06	738200
2022-03-21 16:03:52	17500360	4.09251e-11	4.39418e-11	6.11128e-09	3.72809e-11	4.31343e-10	2.65195e-11	8.78836e-15	6.10822e-09	3.72772e-11	1.44371e-10	0.0043416	1.43877e-06	710779
2022-03-21 16:04:23	17531068	3.27121e-11	3.14513e-11	5.97719e-09	2.75952e-11	4.02863e-10	2.11974e-11	6.29026e-15	5.9742e-09	2.75924e-11	1.34838e-10	0.00354816	1.0529e-06	593914
2022-03-21 16:04:53	17561776	2.95624e-11	3.68161e-11	5.88709e-09	3.14867e-11	4.00475e-10	1.91564e-11	7.36322e-15	5.88415e-09	3.14836e-11	1.34039e-10	0.0032556	1.25137e-06	553284
2022-03-21 16:05:24	17592482	3.10997e-11	3.10213e-11	5.80578e-09	-5.88024e-12	3.7628e-10	2.01526e-11	6.20426e-15	5.80288e-09	-5.87965e-12	1.25941e-10	0.00347286	1.06917e-06	598473
2022-03-21 16:05:55	17623190	3.31421e-11	3.53009e-11	5.77182e-09	-1.80599e-11	3.73377e-10	2.14761e-11	7.06018e-15	5.76893e-09	-1.80581e-11	1.24969e-10	0.00372271	1.22383e-06	645303
2022-03-21 16:06:25	17653896	2.46927e-11	3.78296e-11	5.73675e-09	-1.84792e-11	3.54964e-10	1.60009e-11	7.56592e-15	5.73388e-09	-1.84774e-11	1.18806e-10	0.00279058	1.31951e-06	486683
2022-03-21 16:06:55	17683564	2.22309e-11	3.97339e-11	5.7164e-09	5.85874e-12	3.48353e-10	1.44056e-11	7.94678e-15	5.71354e-09	5.85815e-12	1.16594e-10	0.00252131	1.39087e-06	441287
2022-03-21 16:07:26	17714270	3.89041e-11	4.17918e-11	5.67098e-09	2.33274e-12	3.53536e-10	2.52099e-11	8.35836e-15	5.66814e-09	2.33251e-12	1.18328e-10	0.00444764	1.47462e-06	784673
2022-03-21 16:07:56	17744976	3.53674e-11	4.2529e-11	5.66122e-09	2.21449e-12	3.35768e-10	2.29181e-11	8.5058e-15	5.65839e-09	2.21427e-12	1.12382e-10	0.00405028	1.50322e-06	715801
2022-03-21 16:08:27	17775684	1.99949e-11	2.84926e-11	5.64958e-09	2.71974e-12	3.31329e-10	1.29567e-11	5.69852e-15	5.64676e-09	2.71947e-12	1.10896e-10	0.00229454	1.00917e-06	406346
2022-03-21 16:08:58	17806392	2.95947e-11	4.36347e-11	5.60506e-09	-2.12419e-11	3.23759e-10	1.91774e-11	8.72694e-15	5.60226e-09	-2.12398e-11	1.08362e-10	0.00342315	1.55775e-06	611030
2022-03-21 16:09:29	17837098	3.61414e-11	3.57309e-11	5.61331e-09	2.78424e-12	3.21869e-10	2.34196e-11	7.14618e-15	5.6105e-09	2.78396e-12	1.0773e-10	0.00417425	1.27371e-06	744006
2022-03-21 16:09:59	17867804	1.39534e-11	3.54749e-11	5.5953e-09	-1.02984e-11	3.13661e-10	9.0418e-12	7.09498e-15	5.5925e-09	-1.02974e-11	1.04982e-10	0.00161677	1.26866e-06	289096
2022-03-21 16:10:30	17898512	2.08442e-11	1.01869e-11	5.55545e-09	-2.50474e-12	2.99871e-10	1.3507e-11	2.03738e-15	5.55267e-09	-2.50449e-12	1.00367e-10	0.00243253	3.66919e-07	438083
2022-03-21 16:11:01	17929220	4.55799e-12	4.95523e-11	5.57978e-09	3.71949e-12	3.24772e-10	2.95358e-12	9.91046e-15	5.57699e-09	3.71912e-12	1.08701e-10	0.000529601	1.77703e-06	94961.7
2022-03-21 16:11:31	17959926	2.68964e-11	3.99591e-11	5.54258e-09	-8.04098e-12	3.09737e-10	1.74289e-11	7.99182e-15	5.53981e-09	-8.04018e-12	1.03669e-10	0.00314611	1.44262e-06	567910
2022-03-21 16:12:02	17990632	3.29487e-11	3.81266e-11	5.51799e-09	-7.76148e-12	3.08532e-10	2.13508e-11	7.62532e-15	5.51523e-09	-7.7607e-12	1.03266e-10	0.00387124	1.38259e-06	701917
2022-03-21 16:12:33	18021340	2.15322e-11	3.81368e-11	5.53816e-09	-1.68559e-11	3.05361e-10	1.39529e-11	7.62736e-15	5.53539e-09	-1.68542e-11	1.02204e-10	0.00252066	1.37793e-06	455373
2022-03-21 16:13:04	18052048	1.39964e-11	4.34606e-11	5.54428e-09	-3.55824e-12	3.02251e-10	9.06967e-12	8.69212e-15	5.54151e-09	-3.55788e-12	1.01163e-10	0.00163668	1.56855e-06	295349
2022-03-21 16:13:34	18082756	1.64044e-11	4.4853e-11	6.13163e-09	-3.82054e-11	2.98719e-10	1.06301e-11	8.9706e-15	6.12856e-09	-3.82016e-11	9.99812e-11	0.00173451	1.46374e-06	283020
2022-03-21 16:14:05	18113460	2.66922e-11	1.97083e-11	5.13063e-09	-8.78273e-12	2.85765e-10	1.72965e-11	3.94166e-15	5.12806e-09	-8.78185e-12	9.56455e-11	0.00337292	7.68645e-07	657737
2022-03-21 16:14:36	18144168	2.92292e-11	2.47556e-11	5.4351e-09	-1.27064e-11	2.92346e-10	1.89405e-11	4.95112e-15	5.43238e-09	-1.27051e-11	9.78482e-11	0.0034866	9.11409e-07	641817
2022-03-21 16:15:06	18174876	3.45719e-11	3.54032e-11	7.89179e-09	1.00189e-11	3.27145e-10	2.24026e-11	7.08064e-15	7.88784e-09	1.00179e-11	1.09495e-10	0.00284014	8.97665e-07	360066
2022-03-21 16:15:37	18205582	3.29594e-11	4.09318e-11	2.28437e-07	-3.97749e-12	3.06266e-10	2.13577e-11	8.18636e-15	2.28323e-07	-3.97709e-12	1.02507e-10	9.35417e-05	3.58543e-08	409.69
2022-03-21 16:16:09	18237830	2.88529e-11	2.82059e-11	3.22141e-07	1.10939e-11	2.84229e-10	1.86967e-11	5.64118e-15	3.2198e-07	1.10928e-11	9.51314e-11	5.80678e-05	1.75203e-08	180.346
2022-03-21 16:16:37	18265936	1.63722e-11	4.1802e-11	3.64066e-07	6.05224e-12	2.6673e-10	1.06092e-11	8.3604e-15	3.63884e-07	6.05163e-12	8.92745e-11	2.91554e-05	2.29755e-08	80.1228
2022-03-21 16:17:06	18294044	1.61034e-11	3.22294e-11	3.60751e-07	-8.78273e-12	3.25755e-10	1.0435e-11	6.44588e-15	3.60571e-07	-8.78185e-12	1.0903e-10	2.89402e-05	1.78769e-08	80.2624
2022-03-21 16:17:34	18322152	2.80396e-09	2.35578e-11	3.55734e-07	6.66498e-11	1.56536e-09	1.81697e-09	4.71156e-15	3.55556e-07	6.66431e-11	5.23926e-10	0.00511021	1.32512e-08	14372.4
2022-03-21 16:18:07	18355588	9.06489e-09	2.84823e-11	3.35309e-07	1.46844e-10	1.5001e-09	5.87405e-09	5.69646e-15	3.35141e-07	1.46829e-10	5.02083e-10	0.0175271	1.69972e-08	52297.6
2022-03-21 16:18:30	18378616	1.08507e-08	3.9181e-11	3.35399e-07	1.48435e-10	1.14923e-09	7.03125e-09	7.8362e-15	3.35231e-07	1.4842e-10	3.84647e-10	0.0209743	2.33755e-08	62566.8
2022-03-21 16:18:49	18397992	1.14338e-08	2.89328e-11	3.30472e-07	1.53165e-10	9.204e-10	7.4091e-09	5.78656e-15	3.30307e-07	1.5315e-10	3.08058e-10	0.022431	1.75187e-08	67909.5
2022-03-21 16:19:09	18417368	1.16798e-08	3.07347e-11	3.2868e-07	1.34729e-10	7.61957e-10	7.56851e-09	6.14694e-15	3.28516e-07	1.34716e-10	2.55027e-10	0.0230385	1.87113e-08	70129.1
2022-03-21 16:19:28	18436744	1.18995e-08	4.17509e-11	3.3083e-07	1.18873e-10	6.74454e-10	7.71088e-09	8.35018e-15	3.30665e-07	1.18861e-10	2.2574e-10	0.0233193	2.52527e-08	70522.6
2022-03-21 16:19:48	18456120	9.95792e-09	3.0448e-11	3.11928e-07	8.71931e-11	5.09518e-10	6.45273e-09	6.0896e-15	3.11772e-07	8.71844e-11	1.70536e-10	0.020697	1.95322e-08	66384.9
2022-03-21 16:20:10	18478086	3.69208e-09	3.7543e-11	3.07897e-07	2.13387e-11	4.2348e-10	2.39247e-09	7.5086e-15	3.07743e-07	2.13366e-11	1.41739e-10	0.00777424	2.43989e-08	25262.1
2022-03-21 16:20:31	18499564	1.87617e-09	2.53802e-11	3.25813e-07	1.23947e-11	3.90224e-10	1.21576e-09	5.07604e-15	3.2565e-07	1.23935e-11	1.30608e-10	0.00373333	1.55874e-08	11464.2
2022-03-21 16:20:53	18521040	1.00977e-09	3.91196e-11	3.46955e-07	1.17067e-11	3.60784e-10	6.54331e-10	7.82392e-15	3.46782e-07	1.17055e-11	1.20754e-10	0.00188687	2.25615e-08	5441.09
2022-03-21 16:21:22	18550056	4.90897e-10	3.54851e-11	3.57705e-07	-7.79373e-12	3.6381e-10	3.18101e-10	7.09702e-15	3.57526e-07	-7.79295e-12	1.21767e-10	0.000889729	1.98504e-08	2488.57
2022-03-21 16:21:46	18574916	2.47443e-10	3.31509e-11	1.56323e-07	-2.24244e-11	6.2614e-10	1.60343e-10	6.63018e-15	1.56245e-07	-2.24222e-11	2.09569e-10	0.00102623	4.24346e-08	6568.09
2022-03-21 16:22:15	18603020	1.19959e-10	3.42053e-11	5.02007e-08	4.75149e-12	6.24581e-10	7.77334e-11	6.84106e-15	5.01756e-08	4.75101e-12	2.09047e-10	0.00154923	1.36342e-07	30876.1
2022-03-21 16:22:40	18628900	8.34198e-11	3.64475e-11	2.12658e-08	-1.00834e-11	5.77711e-10	5.4056e-11	7.2895e-15	2.12552e-08	-1.00824e-11	1.9336e-10	0.00254319	3.42952e-07	119651
2022-03-21 16:23:09	18657504	6.39946e-11	4.28668e-11	1.08467e-08	-1.19324e-12	5.41899e-10	4.14685e-11	8.57336e-15	1.08413e-08	-1.19312e-12	1.81374e-10	0.00382506	7.90807e-07	352823
2022-03-21 16:23:38	18686112	5.31264e-11	4.03891e-11	7.6392e-09	-2.44024e-12	4.97033e-10	3.44259e-11	8.07782e-15	7.63538e-09	-2.44e-12	1.66357e-10	0.00450874	1.05795e-06	590506
2022-03-21 16:24:06	18714720	3.64854e-11	3.18097e-11	6.56522e-09	3.35184e-11	4.62779e-10	2.36425e-11	6.36194e-15	6.56194e-09	3.3515e-11	1.54892e-10	0.00360298	9.69522e-07	549073
2022-03-21 16:24:38	18746448	4.10971e-11	3.16253e-11	6.17561e-09	-1.21474e-12	4.31327e-10	2.66309e-11	6.32506e-15	6.17252e-09	-1.21462e-12	1.44365e-10	0.00431443	1.02471e-06	698974
2022-03-21 16:25:09	18777156	3.29164e-11	4.2918e-11	5.99991e-09	1.63077e-11	4.27242e-10	2.13298e-11	8.5836e-15	5.99691e-09	1.63061e-11	1.42998e-10	0.0035568	1.43134e-06	593106
2022-03-21 16:25:39	18807860	4.13444e-11	3.30382e-11	5.90484e-09	1.18249e-13	3.96029e-10	2.67912e-11	6.60764e-15	5.90189e-09	1.18237e-13	1.32551e-10	0.00453942	1.11958e-06	769148
2022-03-21 16:26:10	18838568	3.52599e-11	4.2099e-11	5.84908e-09	1.56734e-11	3.88726e-10	2.28484e-11	8.4198e-15	5.84616e-09	1.56718e-11	1.30107e-10	0.00390828	1.44023e-06	668521
2022-03-21 16:26:41	18869276	4.35911e-11	4.0082e-11	5.80878e-09	3.30024e-11	3.80234e-10	2.8247e-11	8.0164e-15	5.80588e-09	3.29991e-11	1.27264e-10	0.00486525	1.38074e-06	837987
2022-03-21 16:27:11	18899982	2.68749e-11	2.77145e-11	5.76049e-09	2.23599e-11	3.62934e-10	1.74149e-11	5.5429e-15	5.75761e-09	2.23577e-11	1.21474e-10	0.00302468	9.62709e-07	525336
2022-03-21 16:27:42	18930690	3.80119e-11	4.63887e-11	5.72543e-09	1.43942e-11	3.6457e-10	2.46317e-11	9.27774e-15	5.72257e-09	1.43928e-11	1.22022e-10	0.00430431	1.62125e-06	752164
2022-03-21 16:28:13	18961396	3.07449e-11	3.16151e-11	5.6901e-09	-2.12849e-12	3.41227e-10	1.99227e-11	6.32302e-15	5.68725e-09	-2.12828e-12	1.14209e-10	0.00350304	1.11179e-06	615946
2022-03-21 16:28:44	18992104	3.49911e-11	2.97416e-11	5.6566e-09	-6.81548e-12	3.3811e-10	2.26742e-11	5.94832e-15	5.65377e-09	-6.8148e-12	1.13165e-10	0.00401046	1.0521e-06	709343
2022-03-21 16:29:14	19022810	3.20242e-11	2.51345e-11	5.65352e-09	2.97237e-11	3.3285e-10	2.07517e-11	5.0269e-15	5.65069e-09	2.97207e-11	1.11405e-10	0.00367241	8.89608e-07	649905
2022-03-21 16:29:45	19053516	3.54749e-11	3.95804e-11	5.64848e-09	2.61224e-11	3.28596e-10	2.29877e-11	7.91608e-15	5.64566e-09	2.61198e-11	1.09981e-10	0.00407176	1.40215e-06	721219
2022-03-21 16:30:16	19084224	2.18009e-11	2.9588e-11	5.6282e-09	-9.38473e-12	3.18499e-10	1.4127e-11	5.9176e-15	5.62539e-09	-9.38379e-12	1.06602e-10	0.00251129	1.05195e-06	446421
2022-03-21 16:30:46	19114932	2.25857e-11	3.35399e-11	5.60843e-09	1.42652e-11	3.17976e-10	1.46355e-11	6.70798e-15	5.60563e-09	1.42638e-11	1.06427e-10	0.00261087	1.19665e-06	465758
2022-03-21 16:31:17	19145638	3.07019e-11	3.99694e-11	5.58415e-09	2.09409e-11	3.26515e-10	1.98948e-11	7.99388e-15	5.58136e-09	2.09388e-11	1.09285e-10	0.00356451	1.43225e-06	638646
2022-03-21 16:31:48	19176344	3.24541e-11	3.34477e-11	5.56798e-09	-1.46199e-12	3.16334e-10	2.10303e-11	6.68954e-15	5.5652e-09	-1.46184e-12	1.05877e-10	0.00377889	1.20203e-06	679022
2022-03-21 16:32:19	19207052	1.72537e-11	2.73151e-11	5.54182e-09	-2.08442e-11	3.0447e-10	1.11804e-11	5.46302e-15	5.53905e-09	-2.08421e-11	1.01906e-10	0.00201847	9.86274e-07	364407
2022-03-21 16:32:49	19237760	2.41874e-11	2.90659e-11	5.54774e-09	-2.23599e-11	3.11404e-10	1.56734e-11	5.81318e-15	5.54497e-09	-2.23577e-11	1.04227e-10	0.00282661	1.04837e-06	509761
2022-03-21 16:33:20	19268466	1.59207e-11	3.43077e-11	5.56244e-09	2.17149e-11	3.07687e-10	1.03166e-11	6.86154e-15	5.55966e-09	2.17127e-11	1.02983e-10	0.00185562	1.23417e-06	333765
2022-03-21 16:33:51	19299172	2.09087e-11	4.27132e-11	5.53271e-09	1.10402e-11	3.00139e-10	1.35488e-11	8.54264e-15	5.52994e-09	1.10391e-11	1.00457e-10	0.00245009	1.5448e-06	443058
2022-03-21 16:34:21	19329880	2.49292e-11	2.92092e-11	5.53443e-09	5.93399e-12	2.90948e-10	1.61541e-11	5.84184e-15	5.53166e-09	5.9334e-12	9.73803e-11	0.0029203	1.05607e-06	527925
2022-03-21 16:34:52	19360588	1.92317e-11	4.38496e-11	5.20283e-09	-5.95549e-12	2.90833e-10	1.24621e-11	8.76992e-15	5.20023e-09	-5.95489e-12	9.73418e-11	0.00239646	1.68645e-06	460838
2022-03-21 16:35:23	19391296	3.01107e-11	4.0553e-11	5.30554e-09	-1.04274e-12	3.0308e-10	1.95117e-11	8.1106e-15	5.30289e-09	-1.04264e-12	1.01441e-10	0.00367945	1.52947e-06	693859
2022-03-21 16:35:54	19422000	2.86164e-11	3.77068e-11	5.55243e-09	7.41748e-13	2.98028e-10	1.85434e-11	7.54136e-15	5.54965e-09	7.41674e-13	9.975e-11	0.00334137	1.35889e-06	602086
2022-03-21 16:36:24	19452708	1.90059e-11	1.5869e-11	1.17802e-07	2.09624e-12	3.07403e-10	1.23158e-11	3.1738e-15	1.17743e-07	2.09603e-12	1.02888e-10	0.000104599	2.69553e-08	888.367
2022-03-21 16:36:56	19484956	3.44106e-11	4.1761e-11	2.80305e-07	8.55698e-12	2.91724e-10	2.22981e-11	8.3522e-15	2.80165e-07	8.55612e-12	9.764e-11	7.95891e-05	2.98117e-08	284.08
2022-03-21 16:37:25	19513064	2.07904e-11	2.66907e-11	3.47045e-07	-9.91148e-12	2.84606e-10	1.34722e-11	5.33814e-15	3.46871e-07	-9.91049e-12	9.52576e-11	3.88391e-05	1.53894e-08	111.97
2022-03-21 16:37:53	19541170	8.82573e-12	3.54032e-11	3.75622e-07	-8.33123e-12	2.52755e-10	5.71907e-12	7.08064e-15	3.75434e-07	-8.3304e-12	8.45971e-11	1.52332e-05	1.88599e-08	40.575
2022-03-21 16:38:21	19569276	8.57311e-11	3.69491e-11	3.50359e-07	3.73991e-11	1.18521e-09	5.55538e-11	7.38982e-15	3.50184e-07	3.73954e-11	3.9669e-10	0.000158642	2.11027e-08	453.024
2022-03-21 16:38:54	19602716	7.16264e-09	3.32737e-11	3.34145e-07	1.25011e-10	1.64081e-09	4.64139e-09	6.65474e-15	3.33978e-07	1.24998e-10	5.49179e-10	0.0138973	1.99257e-08	41611.4
2022-03-21 16:39:16	19624192	9.8919e-09	4.32149e-11	3.35937e-07	1.21442e-10	1.35906e-09	6.40995e-09	8.64298e-15	3.35769e-07	1.2143e-10	4.54877e-10	0.0190904	2.57408e-08	56855.6
2022-03-21 16:39:39	19647218	1.12552e-08	2.87894e-11	3.33249e-07	1.47242e-10	1.03518e-09	7.29337e-09	5.75788e-15	3.33082e-07	1.47227e-10	3.46475e-10	0.0218966	1.72867e-08	65739.3
2022-03-21 16:39:58	19666596	1.16543e-08	4.47301e-11	3.30472e-07	1.38535e-10	8.49971e-10	7.55199e-09	8.94602e-15	3.30307e-07	1.38521e-10	2.84485e-10	0.0228636	2.7084e-08	69219.2
2022-03-21 16:40:17	19685972	1.18182e-08	2.73254e-11	3.29845e-07	1.40534e-10	7.12578e-10	7.65819e-09	5.46508e-15	3.2968e-07	1.4052e-10	2.385e-10	0.0232292	1.65769e-08	70459.7
2022-03-21 16:40:37	19705346	1.12626e-08	2.66907e-11	3.35309e-07	1.0565e-10	5.73573e-10	7.29816e-09	5.33814e-15	3.35141e-07	1.05639e-10	1.91975e-10	0.0217764	1.5928e-08	64976.7
2022-03-21 16:40:59	19727312	5.44463e-09	3.17482e-11	3.08793e-07	4.17851e-11	4.60436e-10	3.52812e-09	6.34964e-15	3.08639e-07	4.17809e-11	1.54108e-10	0.0114312	2.05731e-08	37037.6
2022-03-21 16:41:20	19748790	2.65527e-09	3.93039e-11	3.12645e-07	2.47357e-11	4.12392e-10	1.72061e-09	7.86078e-15	3.12489e-07	2.47332e-11	1.38028e-10	0.00550617	2.51554e-08	17620.4
2022-03-21 16:41:42	19770266	1.38872e-09	3.63758e-11	3.37191e-07	-2.12849e-12	3.76894e-10	8.99891e-10	7.27516e-15	3.37022e-07	-2.12828e-12	1.26146e-10	0.00267012	2.15866e-08	7922.68
2022-03-21 16:42:11	19799284	6.44504e-10	2.31073e-11	3.58333e-07	3.30562e-11	3.33418e-10	4.17639e-10	4.62146e-15	3.58154e-07	3.30529e-11	1.11595e-10	0.00116609	1.29036e-08	3255.83
2022-03-21 16:42:39	19827390	3.22521e-10	2.65166e-11	2.14731e-07	2.27899e-12	5.43557e-10	2.08994e-10	5.30332e-15	2.14624e-07	2.27876e-12	1.81929e-10	0.000973768	2.47099e-08	4537.1
2022-03-21 16:43:07	19855496	1.5395e-10	3.81675e-11	6.79292e-08	4.81599e-12	6.01208e-10	9.97596e-11	7.6335e-15	6.78952e-08	4.81551e-12	2.01224e-10	0.00146932	1.12431e-07	21640.9
2022-03-21 16:43:36	19884624	8.47313e-11	2.81751e-11	2.459e-08	1.89629e-11	5.75769e-10	5.49059e-11	5.63502e-15	2.45777e-08	1.8961e-11	1.9271e-10	0.00223397	2.29274e-07	90894.2
2022-03-21 16:44:05	19913232	6.91546e-11	2.67111e-11	1.18154e-08	3.54749e-12	5.4206e-10	4.48122e-11	5.34222e-15	1.18095e-08	3.54714e-12	1.81427e-10	0.00379459	4.52367e-07	321317
2022-03-21 16:44:33	19941838	5.69641e-11	4.2959e-11	7.92641e-09	-6.60048e-12	5.01256e-10	3.69127e-11	8.5918e-15	7.92245e-09	-6.59982e-12	1.6777e-10	0.00465926	1.08449e-06	588109
2022-03-21 16:45:02	19970444	5.27609e-11	3.28949e-11	6.59439e-09	-3.42279e-11	4.69282e-10	3.41891e-11	6.57898e-15	6.59109e-09	-3.42245e-11	1.57069e-10	0.00518716	9.98162e-07	786996
2022-03-21 16:45:34	20002172	4.45049e-11	4.13004e-11	6.18784e-09	-1.23517e-11	4.43598e-10	2.88392e-11	8.26008e-15	6.18475e-09	-1.23505e-11	1.48472e-10	0.00466295	1.33556e-06	753944
2022-03-21 16:46:04	20032880	4.00866e-11	4.54366e-11	6.00458e-09	-9.67498e-14	4.29446e-10	2.59761e-11	9.08732e-15	6.00158e-09	-9.67401e-14	1.43736e-10	0.00432821	1.51416e-06	721179
2022-03-21 16:46:35	20063586	3.80011e-11	4.65115e-11	5.91867e-09	2.21342e-11	4.09451e-10	2.46247e-11	9.3023e-15	5.91571e-09	2.2132e-11	1.37043e-10	0.0041626	1.57247e-06	703651
2022-03-21 16:47:06	20094292	3.50879e-11	3.34272e-11	5.84796e-09	1.66517e-11	3.86377e-10	2.2737e-11	6.68544e-15	5.84504e-09	1.665e-11	1.2932e-10	0.00388996	1.14378e-06	665515
2022-03-21 16:47:37	20125000	3.47439e-11	3.75123e-11	5.78801e-09	-6.08449e-12	3.69922e-10	2.2514e-11	7.50246e-15	5.78512e-09	-6.08388e-12	1.23813e-10	0.00389172	1.29686e-06	672712
2022-03-21 16:48:07	20155708	1.61894e-11	3.25366e-11	5.74821e-09	1.43942e-11	3.55847e-10	1.04907e-11	6.50732e-15	5.74534e-09	1.43928e-11	1.19102e-10	0.00182596	1.13263e-06	317815
2022-03-21 16:48:38	20186416	4.10111e-11	3.28744e-11	5.71308e-09	3.77324e-12	3.58589e-10	2.65752e-11	6.57488e-15	5.71022e-09	3.77286e-12	1.2002e-10	0.00465397	1.15142e-06	815024
2022-03-21 16:49:09	20217120	1.49317e-11	6.30972e-11	5.69858e-09	-4.16024e-12	3.42779e-10	9.67574e-12	1.26194e-14	5.69573e-09	-4.15982e-12	1.14728e-10	0.00169877	2.2156e-06	298253
2022-03-21 16:49:39	20247828	1.27709e-11	3.20758e-11	5.66585e-09	-4.26774e-12	3.38509e-10	8.27554e-12	6.41516e-15	5.66302e-09	-4.26731e-12	1.13299e-10	0.00146133	1.13282e-06	258048
2022-03-21 16:50:10	20278536	2.18547e-11	4.07987e-11	5.62765e-09	9.34173e-12	3.39339e-10	1.41618e-11	8.15974e-15	5.62484e-09	9.3408e-12	1.13577e-10	0.00251773	1.45066e-06	447610
2022-03-21 16:50:41	20309242	1.34159e-11	4.55799e-11	5.63986e-09	-3.88074e-12	3.3682e-10	8.6935e-12	9.11598e-15	5.63704e-09	-3.88035e-12	1.12734e-10	0.00154221	1.61716e-06	273585
2022-03-21 16:51:11	20339950	3.28519e-11	3.06426e-11	5.60816e-09	-1.45769e-11	3.21724e-10	2.1288e-11	6.12852e-15	5.60536e-09	-1.45754e-11	1.07681e-10	0.0037978	1.09333e-06	677531
2022-03-21 16:51:42	20370656	3.86031e-11	4.71053e-11	5.58558e-09	-2.70684e-11	3.21801e-10	2.50148e-11	9.42106e-15	5.58279e-09	-2.70657e-11	1.07707e-10	0.0044807	1.68752e-06	802592
2022-03-21 16:52:13	20401364	4.16024e-11	4.52523e-11	5.602e-09	2.26072e-11	3.14874e-10	2.69584e-11	9.05046e-15	5.5992e-09	2.26049e-11	1.05388e-10	0.00481468	1.61638e-06	859887
2022-03-21 16:52:44	20432070	1.38997e-11	4.01434e-11	5.59166e-09	1.48994e-11	3.2114e-10	9.00701e-12	8.02868e-15	5.58886e-09	1.48979e-11	1.07486e-10	0.0016116	1.43655e-06	288359
2022-03-21 16:53:14	20462776	1.87694e-11	3.5649e-11	5.57592e-09	2.23062e-11	3.04854e-10	1.21626e-11	7.1298e-15	5.57313e-09	2.2304e-11	1.02035e-10	0.00218236	1.27932e-06	391586
2022-03-21 16:53:45	20493484	2.38972e-11	4.15461e-11	5.5553e-09	1.01049e-12	3.12716e-10	1.54854e-11	8.30922e-15	5.55252e-09	1.01039e-12	1.04666e-10	0.00278889	1.49648e-06	502275
2022-03-21 16:54:16	20524192	8.75048e-12	4.46072e-11	5.55884e-09	5.48249e-13	3.11511e-10	5.67031e-12	8.92144e-15	5.55606e-09	5.48194e-13	1.04263e-10	0.00102056	1.60571e-06	183685
2022-03-21 16:54:46	20554898	2.75737e-11	3.09907e-11	5.53493e-09	5.53624e-12	3.00876e-10	1.78678e-11	6.19814e-15	5.53216e-09	5.53569e-12	1.00703e-10	0.0032298	1.12038e-06	583822
2022-03-21 16:55:17	20585604	1.77267e-11	3.42053e-11	5.52583e-09	7.41748e-13	2.94465e-10	1.14869e-11	6.84106e-15	5.52307e-09	7.41674e-13	9.85574e-11	0.0020798	1.23863e-06	376567
2022-03-21 16:55:48	20616312	1.20937e-11	4.33275e-11	5.25216e-09	1.40717e-11	3.09553e-10	7.83672e-12	8.6655e-15	5.24953e-09	1.40703e-11	1.03607e-10	0.00149284	1.65072e-06	284376
2022-03-21 16:56:19	20647020	2.95947e-11	4.1331e-11	5.22684e-09	-2.67352e-11	3.00078e-10	1.91774e-11	8.2662e-15	5.22423e-09	-2.67325e-11	1.00436e-10	0.00367085	1.58228e-06	702660
2022-03-21 16:56:49	20677726	5.06539e-11	3.68468e-11	5.51928e-09	-3.29056e-11	2.91416e-10	3.28237e-11	7.36936e-15	5.51652e-09	-3.29023e-11	9.75369e-11	0.00595008	1.33587e-06	1.07859e+06
2022-03-21 16:57:20	20708432	2.23384e-11	3.15639e-11	8.16287e-08	2.03604e-11	3.26246e-10	1.44753e-11	6.31278e-15	8.15879e-08	2.03584e-11	1.09195e-10	0.00017742	7.7374e-08	2174.58
2022-03-21 16:57:52	20740160	1.57487e-11	2.27899e-11	2.79409e-07	-7.19173e-12	2.83492e-10	1.02052e-11	4.55798e-15	2.79269e-07	-7.19101e-12	9.48848e-11	3.65424e-05	1.63211e-08	130.85
2022-03-21 16:58:21	20769288	8.92248e-12	2.24726e-11	3.4382e-07	-1.24807e-11	2.6944e-10	5.78177e-12	4.49452e-15	3.43648e-07	-1.24795e-11	9.01816e-11	1.68247e-05	1.30788e-08	48.959
2022-03-21 16:58:49	20797396	1.13089e-11	2.44383e-11	3.57705e-07	-1.38137e-11	2.6749e-10	7.32817e-12	4.88766e-15	3.57526e-07	-1.38123e-11	8.95289e-11	2.04969e-05	1.36708e-08	57.3297
2022-03-21 16:59:17	20825500	1.91994e-11	3.2598e-11	3.70605e-07	1.90274e-11	8.95414e-10	1.24412e-11	6.5196e-15	3.7042e-07	1.90255e-11	2.99695e-10	3.35868e-05	1.76006e-08	90.6723
2022-03-21 16:59:50	20858940	6.59392e-09	3.88023e-11	3.33338e-07	1.35385e-10	1.6576e-09	4.27286e-09	7.76046e-15	3.33171e-07	1.35371e-10	5.54799e-10	0.0128248	2.32927e-08	38493.1
2022-03-21 17:00:12	20880416	9.4848e-09	3.27106e-11	3.3513e-07	1.19733e-10	1.45328e-09	6.14615e-09	6.54212e-15	3.34962e-07	1.19721e-10	4.86413e-10	0.0183488	1.95309e-08	54778.6
2022-03-21 17:00:32	20900192	1.0897e-08	5.31663e-11	3.33876e-07	7.50348e-11	1.12701e-09	7.06126e-09	1.06333e-14	3.33709e-07	7.50273e-11	3.7721e-10	0.0211599	3.18639e-08	63408.3
2022-03-21 17:00:51	20919568	1.14406e-08	3.62939e-11	3.30292e-07	9.29873e-11	9.03957e-10	7.41351e-09	7.25878e-15	3.30127e-07	9.2978e-11	3.02554e-10	0.0224565	2.19879e-08	68024
2022-03-21 17:01:10	20938944	1.17766e-08	4.45868e-11	3.29487e-07	6.84773e-11	7.58921e-10	7.63124e-09	8.91736e-15	3.29322e-07	6.84705e-11	2.54011e-10	0.0231726	2.70779e-08	70364.4
2022-03-21 17:01:30	20958320	1.18686e-08	3.36423e-11	3.32174e-07	5.50614e-11	6.61093e-10	7.69085e-09	6.72846e-15	3.32008e-07	5.50559e-11	2.21268e-10	0.0231647	2.0266e-08	69771.4
2022-03-21 17:01:49	20977696	9.29196e-09	3.35706e-11	3.09688e-07	6.85848e-12	4.97686e-10	6.02119e-09	6.71412e-15	3.09533e-07	6.85779e-12	1.66576e-10	0.0194525	2.16911e-08	62844.6
2022-03-21 17:02:11	20999664	3.53588e-09	3.5178e-11	3.08345e-07	2.48862e-11	4.24424e-10	2.29125e-09	7.0356e-15	3.08191e-07	2.48837e-11	1.42055e-10	0.00743452	2.28287e-08	24123.1
2022-03-21 17:02:33	21021140	1.81149e-09	2.91888e-11	3.27426e-07	1.97369e-11	3.88013e-10	1.17385e-09	5.83776e-15	3.27262e-07	1.97349e-11	1.29868e-10	0.00358686	1.78382e-08	10960.2
2022-03-21 17:02:54	21042616	1.00216e-09	2.97621e-11	3.47583e-07	-1.50499e-13	3.60155e-10	6.494e-10	5.95242e-15	3.47409e-07	-1.50484e-13	1.20544e-10	0.00186926	1.71337e-08	5380.58
2022-03-21 17:03:23	21071632	4.78245e-10	2.74585e-11	3.42745e-07	1.84362e-11	4.16416e-10	3.09903e-10	5.4917e-15	3.42574e-07	1.84344e-11	1.39374e-10	0.000904631	1.60307e-08	2640.69
2022-03-21 17:03:51	21099740	2.07625e-10	3.88637e-11	1.30433e-07	3.38624e-11	6.09501e-10	1.34541e-10	7.77274e-15	1.30368e-07	3.3859e-11	2.04e-10	0.00103201	5.96216e-08	7916.15
2022-03-21 17:04:19	21127846	1.23796e-10	3.94063e-11	4.23807e-08	2.93904e-11	6.05116e-10	8.02198e-11	7.88126e-15	4.23595e-08	2.93875e-11	2.02532e-10	0.00189379	1.86056e-07	44707.4
2022-03-21 17:04:48	21156976	6.64886e-11	3.33044e-11	1.70957e-08	2.33489e-11	5.64496e-10	4.30846e-11	6.66088e-15	1.70872e-08	2.33466e-11	1.88937e-10	0.00252146	3.89818e-07	147565
2022-03-21 17:05:17	21185580	5.66094e-11	4.58461e-11	9.58367e-09	2.31232e-11	5.29106e-10	3.66829e-11	9.16922e-15	9.57888e-09	2.31209e-11	1.77092e-10	0.00382956	9.57233e-07	399792
2022-03-21 17:05:46	21214188	6.32851e-11	4.0297e-11	7.12453e-09	1.78019e-11	4.86052e-10	4.10087e-11	8.0594e-15	7.12097e-09	1.78001e-11	1.62682e-10	0.00575887	1.13178e-06	808720
2022-03-21 17:06:17	21245916	3.94739e-11	3.45944e-11	6.36811e-09	-1.07069e-11	4.59569e-10	2.55791e-11	6.91888e-15	6.36493e-09	-1.07058e-11	1.53818e-10	0.00401876	1.08703e-06	631391
2022-03-21 17:06:48	21276622	2.53592e-11	4.37575e-11	6.10093e-09	5.88131e-11	4.34069e-10	1.64328e-11	8.7515e-15	6.09788e-09	5.88072e-11	1.45283e-10	0.00269483	1.43517e-06	441929
2022-03-21 17:07:19	21307330	2.70039e-11	3.50449e-11	5.97098e-09	2.28114e-11	4.11563e-10	1.74985e-11	7.00898e-15	5.96799e-09	2.28091e-11	1.3775e-10	0.00293206	1.17443e-06	491298
2022-03-21 17:07:50	21338036	2.72082e-11	3.30894e-11	5.86625e-09	9.79323e-12	3.92044e-10	1.76309e-11	6.61788e-15	5.86332e-09	9.79225e-12	1.31217e-10	0.00300699	1.12869e-06	512847
2022-03-21 17:08:20	21368744	5.02239e-11	4.41056e-11	5.8143e-09	2.58214e-11	3.91368e-10	3.25451e-11	8.82112e-15	5.81139e-09	2.58188e-11	1.30991e-10	0.00560022	1.5179e-06	963663
2022-03-21 17:08:48	21396200	4.62249e-11	2.7049e-11	5.78575e-09	2.85627e-11	3.62451e-10	2.99537e-11	5.4098e-15	5.78286e-09	2.85598e-11	1.21312e-10	0.00517975	9.35489e-07	895707
2022-03-21 17:09:18	21426908	2.25427e-11	3.74201e-11	5.72923e-09	2.12849e-11	3.562e-10	1.46077e-11	7.48402e-15	5.72637e-09	2.12828e-11	1.1922e-10	0.00255095	1.30694e-06	445474
2022-03-21 17:09:49	21457616	3.07019e-11	3.0407e-11	5.75395e-09	2.72727e-11	3.52684e-10	1.98948e-11	6.0814e-15	5.75107e-09	2.727e-11	1.18043e-10	0.00345933	1.05744e-06	601510
2022-03-21 17:10:17	21485072	3.14652e-11	3.2127e-11	5.67855e-09	-7.25623e-12	3.48476e-10	2.03894e-11	6.4254e-15	5.67571e-09	-7.2555e-12	1.16635e-10	0.0035924	1.13209e-06	632944
2022-03-21 17:10:47	21515778	3.51846e-11	5.2419e-11	5.66387e-09	3.56576e-11	3.43101e-10	2.27996e-11	1.04838e-14	5.66104e-09	3.5654e-11	1.14836e-10	0.00402746	1.85192e-06	711435
2022-03-21 17:11:18	21546484	2.55957e-11	3.92732e-11	5.62956e-09	-3.53674e-12	3.24879e-10	1.6586e-11	7.85464e-15	5.62675e-09	-3.53639e-12	1.08737e-10	0.00294771	1.39595e-06	523875
2022-03-21 17:11:49	21577192	3.73669e-11	2.28002e-11	5.62799e-09	1.09327e-11	3.24934e-10	2.42138e-11	4.56004e-15	5.62518e-09	1.09316e-11	1.08755e-10	0.00430453	8.10648e-07	765226
2022-03-21 17:12:19	21607900	3.16479e-11	4.07066e-11	5.60664e-09	1.98014e-11	3.27084e-10	2.05078e-11	8.14132e-15	5.60384e-09	1.97994e-11	1.09475e-10	0.00365961	1.45281e-06	653054
2022-03-21 17:12:50	21638606	1.98874e-11	3.0837e-11	5.58683e-09	-1.29752e-11	3.11526e-10	1.2887e-11	6.1674e-15	5.58404e-09	-1.29739e-11	1.04268e-10	0.00230784	1.10447e-06	413292
2022-03-21 17:13:21	21669312	2.77134e-11	3.88125e-11	5.56505e-09	1.53724e-11	3.15957e-10	1.79583e-11	7.7625e-15	5.56227e-09	1.53709e-11	1.05751e-10	0.00322859	1.39556e-06	580445
2022-03-21 17:13:52	21700020	2.23707e-11	3.87715e-11	5.57502e-09	-1.93069e-11	3.10621e-10	1.44962e-11	7.7543e-15	5.57223e-09	-1.9305e-11	1.03965e-10	0.00260151	1.3916e-06	466870
2022-03-21 17:14:22	21730728	2.96054e-11	4.95625e-11	5.56473e-09	6.61123e-12	3.14444e-10	1.91843e-11	9.9125e-15	5.56195e-09	6.61057e-12	1.05244e-10	0.00344921	1.7822e-06	620143
2022-03-21 17:14:53	21761436	1.85007e-11	3.90685e-11	5.55028e-09	8.99773e-12	3.08731e-10	1.19885e-11	7.8137e-15	5.5475e-09	8.99683e-12	1.03332e-10	0.00216105	1.40851e-06	389554
2022-03-21 17:15:24	21792140	3.50019e-11	3.56899e-11	5.56283e-09	1.93499e-12	2.93106e-10	2.26812e-11	7.13798e-15	5.56005e-09	1.9348e-12	9.81026e-11	0.00407932	1.2838e-06	733685
2022-03-21 17:15:54	21822848	9.59973e-12	3.67444e-11	5.55782e-09	1.16099e-11	2.96446e-10	6.22063e-12	7.34888e-15	5.55504e-09	1.16087e-11	9.92205e-11	0.00111982	1.32292e-06	201586
2022-03-21 17:16:25	21853556	2.09194e-11	3.8403e-11	5.50169e-09	-3.59586e-11	2.98112e-10	1.35558e-11	7.6806e-15	5.49894e-09	-3.5955e-11	9.97781e-11	0.00246516	1.39674e-06	448298
2022-03-21 17:16:53	21881012	2.26717e-11	3.48504e-11	5.18866e-09	-2.16827e-11	2.97498e-10	1.46913e-11	6.97008e-15	5.18607e-09	-2.16805e-11	9.95726e-11	0.00283283	1.344e-06	546239
2022-03-21 17:17:23	21911720	2.48432e-11	2.72947e-11	5.29969e-09	1.37707e-11	2.94887e-10	1.60984e-11	5.45894e-15	5.29704e-09	1.37693e-11	9.86987e-11	0.00303913	1.03056e-06	573741
2022-03-21 17:17:54	21942426	3.12609e-11	3.17687e-11	5.52531e-09	3.12932e-11	3.01767e-10	2.02571e-11	6.35374e-15	5.52255e-09	3.12901e-11	1.01001e-10	0.00366807	1.15051e-06	664198
2022-03-21 17:18:25	21973132	1.64152e-11	3.25468e-11	1.21027e-07	-7.35298e-12	3.19681e-10	1.0637e-11	6.50936e-15	1.20966e-07	-7.35224e-12	1.06997e-10	8.79339e-05	5.38113e-08	726.927
2022-03-21 17:18:57	22005380	2.86917e-11	3.53725e-11	2.84068e-07	-3.10674e-12	2.86786e-10	1.85922e-11	7.0745e-15	2.83926e-07	-3.10643e-12	9.59873e-11	6.54826e-05	2.49167e-08	230.633
2022-03-21 17:19:25	22033488	1.57379e-11	3.10726e-11	3.47762e-07	3.22499e-13	2.72965e-10	1.01982e-11	6.21452e-15	3.47588e-07	3.22467e-13	9.13614e-11	2.93398e-05	1.7879e-08	84.4096
2022-03-21 17:19:53	22061596	1.70279e-11	1.70259e-11	3.71859e-07	2.25642e-11	2.5009e-10	1.10341e-11	3.40518e-15	3.71673e-07	2.25619e-11	8.37051e-11	2.96876e-05	9.16176e-09	79.8756
2022-03-21 17:20:21	22089702	1.12283e-10	4.79142e-11	3.55107e-07	3.15942e-11	1.17364e-09	7.27594e-11	9.58284e-15	3.54929e-07	3.1591e-11	3.92817e-10	0.000204997	2.69993e-08	577.57
2022-03-21 17:20:55	22123140	7.23431e-09	4.26313e-11	3.33697e-07	1.2471e-10	1.62609e-09	4.68783e-09	8.52626e-15	3.3353e-07	1.24698e-10	5.44252e-10	0.0140552	2.55637e-08	42140.7
2022-03-21 17:21:16	22144616	9.97245e-09	4.8037e-11	3.37191e-07	1.27183e-10	1.34943e-09	6.46215e-09	9.6074e-15	3.37022e-07	1.2717e-10	4.51654e-10	0.0191742	2.85067e-08	56893.1
2022-03-21 17:21:39	22167644	1.12397e-08	3.32737e-11	3.32353e-07	9.42021e-11	1.03103e-09	7.28333e-09	6.65474e-15	3.32187e-07	9.41927e-11	3.45086e-10	0.0219254	2.00331e-08	66003.2
2022-03-21 17:21:59	22187020	1.15152e-08	2.9158e-11	3.28233e-07	9.21811e-11	8.356e-10	7.46185e-09	5.8316e-15	3.28069e-07	9.21719e-11	2.79675e-10	0.0227448	1.77755e-08	69329.2
2022-03-21 17:22:18	22206396	1.17612e-08	4.70644e-11	3.28322e-07	8.10656e-11	7.12401e-10	7.62126e-09	9.41288e-15	3.28158e-07	8.10575e-11	2.38441e-10	0.0232244	2.8684e-08	70771.9
2022-03-21 17:22:37	22225772	1.11409e-08	3.7543e-11	3.74995e-07	6.18984e-11	5.6184e-10	7.2193e-09	7.5086e-15	3.74808e-07	6.18922e-11	1.88048e-10	0.0192614	2.00332e-08	51390
2022-03-21 17:22:59	22247738	5.14066e-09	3.8833e-11	3.08434e-07	2.44454e-11	4.56021e-10	3.33115e-09	7.7666e-15	3.0828e-07	2.4443e-11	1.5263e-10	0.0108056	2.51933e-08	35051.3
2022-03-21 17:23:21	22269216	2.54047e-09	1.01664e-11	3.13809e-07	5.72759e-11	4.05297e-10	1.64622e-09	2.03328e-15	3.13652e-07	5.72702e-11	1.35653e-10	0.00524857	6.4826e-09	16733.7
2022-03-21 17:23:42	22290692	1.35354e-09	2.50321e-11	3.37638e-07	2.24674e-11	3.69024e-10	8.77094e-10	5.00642e-15	3.37469e-07	2.24652e-11	1.23512e-10	0.00259903	1.48352e-08	7701.55
2022-03-21 17:24:11	22319708	6.07567e-10	2.20835e-11	3.57167e-07	4.46124e-11	3.34324e-10	3.93703e-10	4.4167e-15	3.56988e-07	4.46079e-11	1.11898e-10	0.00110285	1.23721e-08	3089.31
2022-03-21 17:24:39	22347816	3.15909e-10	3.03456e-11	2.09535e-07	5.40724e-12	5.70716e-10	2.04709e-10	6.06912e-15	2.0943e-07	5.4067e-12	1.91019e-10	0.000977457	2.89792e-08	4667.22
2022-03-21 17:25:07	22375920	1.46737e-10	3.62632e-11	6.63984e-08	1.68774e-11	6.24512e-10	9.50856e-11	7.25264e-15	6.63652e-08	1.68757e-11	2.09024e-10	0.00143276	1.09284e-07	21589.1
2022-03-21 17:25:37	22405050	7.85608e-11	3.08472e-11	2.41332e-08	2.75092e-11	5.76483e-10	5.09074e-11	6.16944e-15	2.41211e-08	2.75064e-11	1.92949e-10	0.00211049	2.55769e-07	87495.5
2022-03-21 17:26:05	22433656	5.89959e-11	5.09037e-11	1.16838e-08	1.86834e-11	5.44786e-10	3.82293e-11	1.01807e-14	1.1678e-08	1.86815e-11	1.8234e-10	0.00327363	8.71791e-07	280326
2022-03-21 17:26:34	22462264	5.73081e-11	3.01307e-11	7.92363e-09	1.85974e-11	4.96672e-10	3.71356e-11	6.02614e-15	7.91967e-09	1.85955e-11	1.66236e-10	0.00468904	7.60908e-07	592075
2022-03-21 17:27:02	22490870	5.68996e-11	3.66932e-11	6.60099e-09	1.66087e-11	4.66833e-10	3.68709e-11	7.33864e-15	6.59769e-09	1.6607e-11	1.56249e-10	0.00558846	1.1123e-06	847033
2022-03-21 17:27:34	22522596	3.30024e-11	2.99566e-11	6.17963e-09	-4.64399e-12	4.43629e-10	2.13856e-11	5.99132e-15	6.17654e-09	-4.64353e-12	1.48483e-10	0.00346238	9.70012e-07	560570
2022-03-21 17:28:05	22553304	3.79259e-11	3.0448e-11	6.03143e-09	-3.89149e-12	4.19379e-10	2.4576e-11	6.0896e-15	6.02841e-09	-3.8911e-12	1.40366e-10	0.00407669	1.01015e-06	676246
2022-03-21 17:28:36	22584012	4.54186e-11	3.3069e-11	5.90508e-09	6.95523e-12	3.93134e-10	2.94313e-11	6.6138e-15	5.90213e-09	6.95453e-12	1.31582e-10	0.00498655	1.12058e-06	844873
2022-03-21 17:29:06	22614718	3.29379e-11	2.67009e-11	5.85985e-09	4.97724e-12	3.74383e-10	2.13438e-11	5.34018e-15	5.85692e-09	4.97674e-12	1.25306e-10	0.0036442	9.11773e-07	622203
2022-03-21 17:29:37	22645424	3.15082e-11	3.3888e-11	5.80477e-09	2.84659e-11	3.71903e-10	2.04173e-11	6.7776e-15	5.80187e-09	2.84631e-11	1.24476e-10	0.00351909	1.16818e-06	606545
2022-03-21 17:30:08	22676132	3.23037e-11	2.90147e-11	5.75568e-09	2.38004e-11	3.56576e-10	2.09328e-11	5.80294e-15	5.7528e-09	2.3798e-11	1.19346e-10	0.00363871	1.00872e-06	632511
2022-03-21 17:30:38	22706840	5.04174e-11	3.91709e-11	5.7265e-09	1.21044e-11	3.74514e-10	3.26705e-11	7.83418e-15	5.72364e-09	1.21032e-11	1.2535e-10	0.00570799	1.36874e-06	997267
2022-03-21 17:31:09	22737546	2.45744e-11	3.22397e-11	5.69644e-09	1.55552e-11	3.49866e-10	1.59242e-11	6.44794e-15	5.69359e-09	1.55536e-11	1.171e-10	0.00279687	1.13249e-06	491230
2022-03-21 17:31:40	22768252	2.61762e-11	4.82009e-11	5.66755e-09	-1.13519e-11	3.51939e-10	1.69622e-11	9.64018e-15	5.66472e-09	-1.13508e-11	1.17794e-10	0.00299436	1.70179e-06	528598
2022-03-21 17:32:10	22798960	4.04629e-11	2.4725e-11	5.65551e-09	-2.92399e-12	3.25579e-10	2.622e-11	4.945e-15	5.65268e-09	-2.9237e-12	1.08971e-10	0.0046385	8.74806e-07	820584
2022-03-21 17:32:40	22828626	3.12179e-11	3.55568e-11	5.63642e-09	1.59207e-11	3.29971e-10	2.02292e-11	7.11136e-15	5.6336e-09	1.59191e-11	1.10441e-10	0.00359081	1.26231e-06	637392
2022-03-21 17:33:11	22859336	2.34564e-11	1.69542e-11	5.58908e-09	-6.87998e-12	3.18629e-10	1.51997e-11	3.39084e-15	5.58629e-09	-6.87929e-12	1.06645e-10	0.0027209	6.06994e-07	487069
2022-03-21 17:33:42	22890040	2.51119e-11	2.4899e-11	5.58924e-09	-1.18572e-11	3.14276e-10	1.62725e-11	4.9798e-15	5.58645e-09	-1.1856e-11	1.05188e-10	0.00291286	8.91408e-07	521415
2022-03-21 17:34:09	22917498	2.57032e-11	2.56669e-11	5.60449e-09	8.93323e-12	3.12486e-10	1.66557e-11	5.13338e-15	5.60169e-09	8.93234e-12	1.04589e-10	0.00297333	9.16399e-07	530792
2022-03-21 17:34:40	22948204	4.01619e-11	4.09318e-11	5.5758e-09	3.27874e-12	3.177e-10	2.60249e-11	8.18636e-15	5.57301e-09	3.27841e-12	1.06334e-10	0.00466981	1.46893e-06	837933
2022-03-21 17:35:07	22975660	3.42924e-11	3.23113e-11	5.58753e-09	3.73239e-11	3.12356e-10	2.22215e-11	6.46226e-15	5.58474e-09	3.73202e-11	1.04546e-10	0.00397897	1.15713e-06	712472
2022-03-21 17:35:38	23006370	3.16479e-11	2.91375e-11	5.56432e-09	-9.56748e-13	3.06505e-10	2.05078e-11	5.8275e-15	5.56154e-09	-9.56652e-13	1.02587e-10	0.00368744	1.04782e-06	663025
2022-03-21 17:36:05	23033826	2.86164e-11	2.70899e-11	5.53954e-09	4.89124e-12	3.01406e-10	1.85434e-11	5.41798e-15	5.53677e-09	4.89075e-12	1.00881e-10	0.00334914	9.78545e-07	604891
2022-03-21 17:36:36	23064532	1.48672e-11	3.89661e-11	5.54163e-09	-1.22442e-11	3.1029e-10	9.63395e-12	7.79322e-15	5.53886e-09	-1.2243e-11	1.03854e-10	0.00173934	1.40701e-06	314025
2022-03-21 17:37:07	23095240	2.09302e-11	4.34606e-11	5.55914e-09	3.63994e-11	3.01974e-10	1.35628e-11	8.69212e-15	5.55636e-09	3.63958e-11	1.01071e-10	0.00244094	1.56435e-06	439306
2022-03-21 17:37:34	23122696	2.06184e-11	3.94063e-11	6.16136e-09	8.77198e-12	3.13684e-10	1.33607e-11	7.88126e-15	6.15828e-09	8.7711e-12	1.0499e-10	0.00216955	1.27978e-06	352299
2022-03-21 17:38:05	23153404	2.05109e-11	3.39699e-11	5.1191e-09	1.53832e-11	2.99095e-10	1.32911e-11	6.79398e-15	5.11654e-09	1.53817e-11	1.00107e-10	0.00259767	1.32785e-06	507700
2022-03-21 17:38:36	23184112	2.96699e-11	3.52701e-11	5.42695e-09	-1.77374e-11	2.99279e-10	1.92261e-11	7.05402e-15	5.42424e-09	-1.77356e-11	1.00169e-10	0.00354448	1.30046e-06	653452
2022-03-21 17:39:06	23214818	1.22012e-11	3.28642e-11	7.61253e-09	6.55749e-13	3.17001e-10	7.90638e-12	6.57284e-15	7.60872e-09	6.55683e-13	1.061e-10	0.00103912	8.63856e-07	136570
2022-03-21 17:39:37	23245524	1.54584e-11	2.66599e-11	2.25391e-07	4.09574e-12	2.97789e-10	1.0017e-11	5.33198e-15	2.25278e-07	4.09533e-12	9.967e-11	4.44652e-05	2.36684e-08	197.379
2022-03-21 17:40:09	23277772	1.47597e-11	1.36269e-11	3.21513e-07	-1.23947e-11	2.71314e-10	9.56429e-12	2.72538e-15	3.21352e-07	-1.23935e-11	9.08088e-11	2.97626e-05	8.48097e-09	92.6168
2022-03-21 17:40:37	23305880	1.55229e-11	2.59023e-11	3.61378e-07	1.53832e-11	2.58406e-10	1.00588e-11	5.18046e-15	3.61197e-07	1.53817e-11	8.64885e-11	2.78486e-05	1.43425e-08	77.1008
2022-03-21 17:41:05	23333988	1.14702e-11	3.40928e-11	3.65051e-07	1.04274e-11	3.12986e-10	7.43269e-12	6.81856e-15	3.64868e-07	1.04264e-11	1.04756e-10	2.03709e-05	1.86877e-08	55.8307
2022-03-21 17:41:34	23362096	2.61001e-09	2.79397e-11	3.51255e-07	8.79563e-11	1.50531e-09	1.69129e-09	5.58794e-15	3.51079e-07	8.79475e-11	5.03827e-10	0.00481739	1.59165e-08	13721.7
2022-03-21 17:42:07	23395532	8.94428e-09	3.44715e-11	3.35847e-07	1.21689e-10	1.46778e-09	5.79589e-09	6.8943e-15	3.35679e-07	1.21677e-10	4.91266e-10	0.0172662	2.05384e-08	51436.6
2022-03-21 17:42:30	23418560	1.07439e-08	3.61506e-11	3.34234e-07	9.9749e-11	1.14553e-09	6.96205e-09	7.23012e-15	3.34067e-07	9.9739e-11	3.83409e-10	0.0208403	2.16427e-08	62383.6
2022-03-21 17:42:49	23437936	1.13224e-08	2.49707e-11	3.29218e-07	1.01813e-10	9.11236e-10	7.33692e-09	4.99414e-15	3.29053e-07	1.01803e-10	3.04991e-10	0.022297	1.51773e-08	67761.1
2022-03-21 17:43:09	23457312	1.16758e-08	4.4167e-11	3.27605e-07	1.05435e-10	7.67157e-10	7.56592e-09	8.8334e-15	3.27441e-07	1.05424e-10	2.56767e-10	0.0231062	2.69771e-08	70565.9
2022-03-21 17:43:28	23476688	1.19231e-08	5.47328e-11	3.30024e-07	6.31561e-11	6.49659e-10	7.72617e-09	1.09466e-14	3.29859e-07	6.31498e-11	2.17441e-10	0.0234226	3.31856e-08	71008
2022-03-21 17:43:50	23498656	7.73791e-09	3.18711e-11	1.77733e-07	3.60124e-11	4.03554e-10	5.01417e-09	6.37422e-15	1.77644e-07	3.60088e-11	1.3507e-10	0.0282259	3.5882e-08	158890
2022-03-21 17:44:12	23520132	1.82865e-09	4.53137e-11	1.26581e-07	7.12723e-12	3.85609e-10	1.18497e-09	9.06274e-15	1.26518e-07	7.12652e-12	1.29063e-10	0.009366	7.16322e-08	74029.2
2022-03-21 17:44:33	23541608	1.29928e-09	4.35323e-11	1.27297e-07	4.35159e-11	3.72287e-10	8.41933e-10	8.70646e-15	1.27233e-07	4.35115e-11	1.24604e-10	0.00661724	6.84291e-08	52008.7
2022-03-21 17:44:55	23563084	9.55867e-10	3.40723e-11	1.28014e-07	-1.14379e-11	3.55624e-10	6.19402e-10	6.81446e-15	1.2795e-07	-1.14368e-11	1.19027e-10	0.00484097	5.32588e-08	37834.8
2022-03-21 17:45:24	23592100	6.83344e-10	3.72358e-11	1.31149e-07	2.18547e-11	3.48345e-10	4.42807e-10	7.44716e-15	1.31083e-07	2.18525e-11	1.16591e-10	0.00337805	5.68124e-08	25770.3
2022-03-21 17:45:52	23620208	4.95875e-10	4.25391e-11	1.34195e-07	1.49854e-11	3.46909e-10	3.21327e-10	8.50782e-15	1.34128e-07	1.49839e-11	1.1611e-10	0.00239568	6.34306e-08	17861.1
2022-03-21 17:46:20	23648316	3.668e-10	2.27899e-11	1.40377e-07	1.09219e-11	3.34017e-10	2.37686e-10	4.55798e-15	1.40307e-07	1.09208e-11	1.11795e-10	0.00169405	3.24858e-08	12073.9
2022-03-21 17:46:48	23676420	2.78499e-10	2.78475e-11	1.47722e-07	5.24599e-12	3.15849e-10	1.80467e-10	5.5695e-15	1.47648e-07	5.24547e-12	1.05715e-10	0.00122228	3.77214e-08	8278.33
2022-03-21 17:47:16	23704528	2.26168e-10	1.85104e-11	1.49873e-07	3.13254e-11	3.21279e-10	1.46557e-10	3.70208e-15	1.49798e-07	3.13223e-11	1.07532e-10	0.000978363	2.47138e-08	6531.21
2022-03-21 17:47:44	23732636	1.87458e-10	2.28616e-11	1.53635e-07	2.65417e-11	3.04923e-10	1.21473e-10	4.57232e-15	1.53558e-07	2.6539e-11	1.02058e-10	0.000791054	2.97758e-08	5151.49
2022-03-21 17:48:12	23760742	1.30633e-10	4.5631e-11	1.53008e-07	1.27817e-11	3.47939e-10	8.46502e-11	9.1262e-15	1.52931e-07	1.27804e-11	1.16455e-10	0.000553517	5.96751e-08	3619.38
2022-03-21 17:48:40	23788850	1.77976e-10	2.4254e-11	1.56323e-07	2.85197e-11	3.92113e-10	1.15328e-10	4.8508e-15	1.56245e-07	2.85168e-11	1.3124e-10	0.000738126	3.10461e-08	4724.17
2022-03-21 17:49:08	23816956	2.79091e-10	3.05709e-11	1.59548e-07	4.49779e-11	3.88112e-10	1.80851e-10	6.11418e-15	1.59468e-07	4.49734e-11	1.29901e-10	0.00113409	3.83411e-08	7111.68
2022-03-21 17:49:37	23845060	2.96602e-10	3.34887e-11	1.60712e-07	2.01777e-11	3.60631e-10	1.92198e-10	6.69774e-15	1.60632e-07	2.01757e-11	1.20703e-10	0.00119651	4.16963e-08	7448.81
2022-03-21 17:50:05	23873168	2.8983e-10	2.61583e-11	1.63668e-07	4.68161e-11	3.31015e-10	1.8781e-10	5.23166e-15	1.63586e-07	4.68114e-11	1.10791e-10	0.00114808	3.19811e-08	7018.19
2022-03-21 17:50:33	23901276	2.40853e-10	4.0041e-11	1.65102e-07	1.60604e-11	3.31084e-10	1.56073e-10	8.0082e-15	1.65019e-07	1.60588e-11	1.10814e-10	0.000945784	4.85288e-08	5731.35
2022-03-21 17:51:01	23929380	2.51431e-10	2.26978e-11	1.66982e-07	1.79739e-11	3.05637e-10	1.62927e-10	4.53956e-15	1.66899e-07	1.79721e-11	1.02297e-10	0.000976206	2.71995e-08	5849.1
2022-03-21 17:51:29	23957490	2.17386e-10	3.42053e-11	1.68953e-07	1.77374e-11	3.05553e-10	1.40866e-10	6.84106e-15	1.68869e-07	1.77356e-11	1.02269e-10	0.000834176	4.05112e-08	4939.8
2022-03-21 17:51:57	23985596	2.16149e-10	2.8687e-11	1.63131e-07	4.51821e-11	2.78616e-10	1.40065e-10	5.7374e-15	1.63049e-07	4.51776e-11	9.32528e-11	0.000859031	3.51881e-08	5268.53
2022-03-21 17:52:25	24013704	1.92779e-10	2.21347e-11	1.66624e-07	3.52599e-11	2.73664e-10	1.24921e-10	4.42694e-15	1.66541e-07	3.52564e-11	9.15953e-11	0.000750092	2.65817e-08	4503.95
2022-03-21 17:52:50	24038560	1.49919e-10	3.93449e-11	1.69223e-07	1.00404e-11	2.72634e-10	9.71475e-11	7.86898e-15	1.69138e-07	1.00394e-11	9.12506e-11	0.000574367	4.65239e-08	3395.84
2022-03-21 17:53:18	24066668	1.47339e-10	3.18302e-11	1.68327e-07	2.27147e-11	2.60111e-10	9.54757e-11	6.36604e-15	1.68243e-07	2.27124e-11	8.70592e-11	0.000567487	3.78384e-08	3373.03
2022-03-21 17:53:46	24094776	1.54348e-10	2.45509e-11	1.6537e-07	4.94821e-11	2.48824e-10	1.00018e-10	4.91018e-15	1.65287e-07	4.94772e-11	8.32814e-11	0.000605113	2.97069e-08	3660.98
2022-03-21 17:54:14	24122880	1.37847e-10	2.05785e-11	1.70298e-07	1.73397e-11	2.47541e-10	8.93249e-11	4.1157e-15	1.70213e-07	1.7338e-11	8.2852e-11	0.000524783	2.41797e-08	3083.1
2022-03-21 17:54:42	24150986	1.42931e-10	4.57949e-11	1.66803e-07	2.50797e-11	2.50651e-10	9.26193e-11	9.15898e-15	1.6672e-07	2.50772e-11	8.38929e-11	0.000555539	5.49364e-08	3332.18
2022-03-21 17:55:11	24179092	1.34589e-10	3.13591e-11	1.70745e-07	1.09864e-11	2.54659e-10	8.72137e-11	6.27182e-15	1.7066e-07	1.09853e-11	8.52344e-11	0.000511039	3.67505e-08	2994.49
2022-03-21 17:55:35	24203950	1.24656e-10	2.06911e-11	1.76478e-07	1.78234e-11	2.47264e-10	8.07771e-11	4.13822e-15	1.7639e-07	1.78216e-11	8.27593e-11	0.000457947	2.34607e-08	2596.22
2022-03-21 17:56:04	24232056	1.15454e-10	3.3417e-11	1.71014e-07	2.68749e-12	2.51111e-10	7.48142e-11	6.6834e-15	1.70928e-07	2.68722e-12	8.40469e-11	0.000437693	3.91006e-08	2560.68
2022-03-21 17:56:32	24260164	1.13734e-10	3.73791e-11	1.69043e-07	9.58898e-12	2.50298e-10	7.36996e-11	7.47582e-15	1.68958e-07	9.58802e-12	8.37747e-11	0.0004362	4.42465e-08	2581.7
2022-03-21 17:57:00	24288270	9.83085e-11	4.20682e-11	1.7182e-07	1.05349e-11	2.60748e-10	6.37039e-11	8.41364e-15	1.71734e-07	1.05338e-11	8.72724e-11	0.000370945	4.89923e-08	2160
2022-03-21 17:57:28	24316376	1.12337e-10	2.63221e-11	1.67878e-07	8.26673e-12	2.38204e-10	7.27944e-11	5.26442e-15	1.67794e-07	8.2659e-12	7.97269e-11	0.000433832	3.13743e-08	2585.5
2022-03-21 17:57:56	24344484	1.08209e-10	2.09061e-11	1.66893e-07	1.50177e-11	2.38664e-10	7.01194e-11	4.18122e-15	1.6681e-07	1.50162e-11	7.98808e-11	0.000420356	2.50658e-08	2519.98
2022-03-21 17:58:24	24372592	9.93083e-11	3.32737e-11	1.68595e-07	-4.71924e-12	2.39594e-10	6.43518e-11	6.65474e-15	1.68511e-07	-4.71877e-12	8.01921e-11	0.000381885	3.94915e-08	2266.24
2022-03-21 17:58:52	24400698	1.11273e-10	3.50961e-11	1.80062e-07	1.21474e-11	2.39471e-10	7.21049e-11	7.01922e-15	1.79972e-07	1.21462e-11	8.01509e-11	0.000400645	3.90017e-08	2226.15
2022-03-21 17:59:20	24428804	1.0206e-10	2.09061e-11	1.74777e-07	1.85437e-11	2.38051e-10	6.61349e-11	4.18122e-15	1.7469e-07	1.85418e-11	7.96757e-11	0.000378585	2.39351e-08	2167.19
2022-03-21 17:59:48	24456912	9.95448e-11	3.41337e-11	1.75852e-07	6.11674e-12	2.41145e-10	6.4505e-11	6.82674e-15	1.75764e-07	6.11613e-12	8.07112e-11	0.000366998	3.88404e-08	2088.01
2022-03-21 18:00:17	24485020	1.16368e-10	2.32813e-11	1.75941e-07	2.53484e-11	2.3878e-10	7.54065e-11	4.65626e-15	1.75853e-07	2.53459e-11	7.99197e-11	0.000428804	2.64781e-08	2438.42
2022-03-21 18:00:45	24513126	9.52878e-11	3.03661e-11	1.7191e-07	2.92937e-11	2.40108e-10	6.17465e-11	6.07322e-15	1.71824e-07	2.92908e-11	8.03641e-11	0.000359359	3.53456e-08	2091.44
2022-03-21 18:01:13	24541232	1.01716e-10	2.28002e-11	1.74956e-07	3.11749e-11	2.39164e-10	6.5912e-11	4.56004e-15	1.74869e-07	3.11718e-11	8.00482e-11	0.000376923	2.6077e-08	2155.47
2022-03-21 18:01:41	24569340	8.75371e-11	2.10392e-11	1.73522e-07	7.79373e-12	2.28222e-10	5.6724e-11	4.20784e-15	1.73435e-07	7.79295e-12	7.63859e-11	0.000327062	2.42617e-08	1885.79
2022-03-21 18:02:06	24594196	9.27293e-11	3.30996e-11	1.71552e-07	2.33274e-11	2.362e-10	6.00886e-11	6.61992e-15	1.71466e-07	2.33251e-11	7.90561e-11	0.00035044	3.86077e-08	2043.78
2022-03-21 18:02:31	24619052	8.76553e-11	3.11647e-11	1.7191e-07	2.34457e-11	2.43134e-10	5.68006e-11	6.23294e-15	1.71824e-07	2.34434e-11	8.13769e-11	0.000330574	3.62751e-08	1923.91
2022-03-21 18:02:59	24647160	9.49223e-11	3.41951e-11	1.74149e-07	2.22094e-11	2.4298e-10	6.15097e-11	6.83902e-15	1.74062e-07	2.22072e-11	8.13254e-11	0.000353378	3.92907e-08	2030.19
2022-03-21 18:03:27	24675266	9.01063e-11	1.66266e-11	1.70924e-07	1.78019e-11	2.24014e-10	5.83889e-11	3.32532e-15	1.70839e-07	1.78001e-11	7.49775e-11	0.000341778	1.94647e-08	2000.59
2022-03-21 18:03:55	24703372	9.7599e-11	2.54518e-11	1.6976e-07	4.12799e-12	2.45114e-10	6.32442e-11	5.09036e-15	1.69675e-07	4.12758e-12	8.20397e-11	0.000372737	3.00006e-08	2196.77
2022-03-21 18:04:23	24731480	9.07728e-11	3.09702e-11	1.68595e-07	6.78323e-12	2.45138e-10	5.88208e-11	6.19404e-15	1.68511e-07	6.78255e-12	8.20477e-11	0.000349063	3.67575e-08	2071.46
2022-03-21 18:04:51	24759588	7.90876e-11	4.16382e-11	1.71372e-07	1.85329e-11	2.37728e-10	5.12488e-11	8.32764e-15	1.71286e-07	1.8531e-11	7.95676e-11	0.000299199	4.86182e-08	1746.78
2022-03-21 18:05:19	24787696	7.78621e-11	2.84107e-11	1.7397e-07	9.19123e-12	2.36952e-10	5.04546e-11	5.68214e-15	1.73883e-07	9.19031e-12	7.93078e-11	0.000290164	3.26779e-08	1668.73
2022-03-21 18:05:47	24815800	8.11623e-11	2.95983e-11	1.70656e-07	5.37499e-12	2.32983e-10	5.25932e-11	5.91966e-15	1.70571e-07	5.37445e-12	7.79794e-11	0.000308337	3.4705e-08	1807.68
2022-03-21 18:06:15	24843908	8.42906e-11	2.99873e-11	1.70298e-07	-2.71974e-12	2.42857e-10	5.46203e-11	5.99746e-15	1.70213e-07	-2.71947e-12	8.12842e-11	0.000320894	3.52351e-08	1885.25
2022-03-21 18:06:44	24872016	6.92513e-11	2.83697e-11	1.62683e-07	3.64424e-12	2.38265e-10	4.48748e-11	5.67394e-15	1.62602e-07	3.64388e-12	7.97473e-11	0.00027598	3.48947e-08	1697.28
2022-03-21 18:07:12	24900122	8.10441e-11	2.98542e-11	1.68595e-07	2.25104e-11	2.34288e-10	5.25166e-11	5.97084e-15	1.68511e-07	2.25081e-11	7.84162e-11	0.000311651	3.5433e-08	1849.45
2022-03-21 18:07:40	24928230	5.94044e-11	1.9227e-11	1.70566e-07	1.47167e-11	2.35885e-10	3.84941e-11	3.8454e-15	1.70481e-07	1.47152e-11	7.89507e-11	0.000225797	2.25562e-08	1324.47
2022-03-21 18:08:08	24956336	7.30138e-11	3.06732e-11	1.68058e-07	2.04142e-11	2.276e-10	4.73129e-11	6.13464e-15	1.67974e-07	2.04122e-11	7.61777e-11	0.000281668	3.65214e-08	1676.86
2022-03-21 18:08:33	24981192	6.05224e-11	3.2168e-11	1.69312e-07	1.81244e-11	2.42972e-10	3.92185e-11	6.4336e-15	1.69227e-07	1.81226e-11	8.13227e-11	0.00023175	3.80175e-08	1369.46
2022-03-21 18:09:01	25009300	7.30568e-11	3.22397e-11	1.64743e-07	1.11154e-11	2.46036e-10	4.73408e-11	6.44794e-15	1.64661e-07	1.11143e-11	8.23482e-11	0.000287505	3.9159e-08	1746.05
2022-03-21 18:09:29	25037406	8.64191e-11	2.56156e-11	1.71282e-07	2.22739e-11	2.38818e-10	5.59996e-11	5.12312e-15	1.71196e-07	2.22717e-11	7.99324e-11	0.000327107	2.99254e-08	1910.71
2022-03-21 18:09:57	25065512	8.10978e-11	2.8165e-11	1.63937e-07	-5.72974e-12	2.32322e-10	5.25514e-11	5.633e-15	1.63855e-07	-5.72917e-12	7.77582e-11	0.000320719	3.43779e-08	1957.33
2022-03-21 18:10:25	25093620	7.92166e-11	3.02945e-11	1.68595e-07	2.97022e-11	2.51288e-10	5.13324e-11	6.0589e-15	1.68511e-07	2.96992e-11	8.41061e-11	0.000304624	3.59556e-08	1807.74
2022-03-21 18:10:53	25121728	7.29063e-11	3.39801e-11	1.67162e-07	-8.87948e-12	2.40722e-10	4.72433e-11	6.79602e-15	1.67078e-07	-8.87859e-12	8.05697e-11	0.000282761	4.06756e-08	1692.39
2022-03-21 18:11:21	25149836	8.26351e-11	2.69159e-11	1.6976e-07	2.62837e-11	2.44546e-10	5.35475e-11	5.38318e-15	1.69675e-07	2.62811e-11	8.18495e-11	0.000315589	3.17264e-08	1859.96
2022-03-21 18:11:49	25177940	9.23853e-11	3.76761e-11	1.68147e-07	1.33084e-11	2.41582e-10	5.98657e-11	7.53522e-15	1.68063e-07	1.33071e-11	8.08575e-11	0.00035621	4.48357e-08	2119.5
2022-03-21 18:12:18	25206048	6.57683e-11	2.65575e-11	1.63758e-07	-7.22398e-12	2.42059e-10	4.26179e-11	5.3115e-15	1.63676e-07	-7.22326e-12	8.10171e-11	0.000260379	3.24513e-08	1590.82
2022-03-21 18:12:46	25234156	7.84856e-11	2.86051e-11	1.63668e-07	2.68427e-11	2.39294e-10	5.08587e-11	5.72102e-15	1.63586e-07	2.684e-11	8.00917e-11	0.000310898	3.49725e-08	1900.52
2022-03-21 18:13:14	25262260	7.09283e-11	2.16228e-11	1.68416e-07	2.18224e-12	2.32898e-10	4.59615e-11	4.32456e-15	1.68332e-07	2.18202e-12	7.7951e-11	0.000273041	2.56907e-08	1622.04
2022-03-21 18:13:42	25290370	9.26541e-11	3.27515e-11	1.64743e-07	3.76249e-12	2.38089e-10	6.00399e-11	6.5503e-15	1.64661e-07	3.76211e-12	7.96884e-11	0.000364628	3.97806e-08	2214.42
2022-03-21 18:14:10	25318476	6.42848e-11	4.17918e-11	1.64743e-07	1.91994e-11	2.3534e-10	4.16566e-11	8.35836e-15	1.64661e-07	1.91975e-11	7.87683e-11	0.000252984	5.07611e-08	1536.4
2022-03-21 18:14:38	25346584	7.88941e-11	2.82161e-11	1.63489e-07	5.02024e-12	2.38573e-10	5.11234e-11	5.64322e-15	1.63407e-07	5.01974e-12	7.98504e-11	0.000312859	3.45347e-08	1914.59
2022-03-21 18:15:06	25374690	6.56823e-11	2.06297e-11	1.64385e-07	6.23499e-12	2.33036e-10	4.25621e-11	4.12594e-15	1.64303e-07	6.23437e-12	7.79971e-11	0.000259047	2.51118e-08	1576.64
2022-03-21 18:15:34	25402796	6.78216e-11	2.07423e-11	1.64564e-07	3.73776e-11	2.37251e-10	4.39484e-11	4.14846e-15	1.64482e-07	3.73739e-11	7.94079e-11	0.000267193	2.52214e-08	1624.46
2022-03-21 18:16:02	25430904	6.55856e-11	1.41694e-11	1.64116e-07	1.62109e-11	2.29159e-10	4.24995e-11	2.83388e-15	1.64034e-07	1.62093e-11	7.66995e-11	0.000259089	1.72762e-08	1579.49
2022-03-21 18:16:31	25459012	8.32586e-11	2.9158e-11	1.66087e-07	2.65202e-11	2.46128e-10	5.39516e-11	5.8316e-15	1.66004e-07	2.65175e-11	8.2379e-11	0.000325002	3.51293e-08	1957.8
2022-03-21 18:16:59	25487118	6.11674e-11	2.46328e-11	1.66356e-07	2.68964e-11	2.3299e-10	3.96365e-11	4.92656e-15	1.66273e-07	2.68937e-11	7.79818e-11	0.000238382	2.96294e-08	1433.68
2022-03-21 18:17:27	25515224	7.89371e-11	2.79192e-11	1.64116e-07	7.51423e-12	2.30633e-10	5.11512e-11	5.58384e-15	1.64034e-07	7.51348e-12	7.71929e-11	0.000311833	3.40408e-08	1901.03
2022-03-21 18:17:55	25543332	6.99823e-11	3.3673e-11	1.66356e-07	3.73561e-11	2.4523e-10	4.53485e-11	6.7346e-15	1.66273e-07	3.73524e-11	8.20785e-11	0.000272736	4.05033e-08	1640.29
2022-03-21 18:18:23	25571440	7.05306e-11	3.86487e-11	1.62414e-07	1.37277e-11	2.44761e-10	4.57038e-11	7.72974e-15	1.62333e-07	1.37263e-11	8.19215e-11	0.000281544	4.76166e-08	1734.36
2022-03-21 18:18:51	25599546	6.38226e-11	4.92553e-11	1.59995e-07	2.50474e-12	2.49146e-10	4.1357e-11	9.85106e-15	1.59915e-07	2.50449e-12	8.33892e-11	0.000258619	6.16019e-08	1617.23

## Sheet: Intergration
Index	Real time	ms	Ethylene mbar	Carbon monoxide mbar	Argon mbar	Ethylene oxide mbar	Carbon dioxide mbar	Corrected Et	Corrected CO	Corrected Ar	Corrected CO2	Corrected EO	ć(Et)	ć (CO)	ć(CO2)	ć (EtO)		Time,min	Initial time	6.42837e+07	ć(Et) Integral	ć (CO) Integral	ć(CO2) integral	ć (EtO) Integral
1	2022-03-21 11:12:26	14788	2.69717e-11	3.81982e-11	5.88332e-09	-2.22847e-11	2.89711e-10	1.74777e-11	7.63964e-15	5.88038e-09	1.0053e-10	-2.22847e-11	0.0029722	1.29917e-06	0.0170958	-0.00378967		0	0		0	0		0
2	2022-03-21 11:13:16	64281	2.09517e-11	5.22449e-11	5.53512e-08	9.27723e-12	4.26843e-10	1.35767e-11	1.0449e-14	5.53235e-08	1.48115e-10	9.27723e-12	0.000245406	1.8887e-07	0.00267724	0.000167691		0.833333	0.833333		0.00134067	6.20019e-07	0.00823876	-0.00150916
3	2022-03-21 11:13:44	92759	4.58594e-11	4.53547e-11	2.62031e-07	2.35854e-11	3.18967e-10	2.97169e-11	9.07094e-15	2.619e-07	1.10682e-10	2.35854e-11	0.000113467	3.46351e-08	0.00042261	9.0055e-05		1.3	1.3		0.00142441	6.7217e-07	0.00896206	-0.00144902
4	2022-03-21 11:14:13	121886	2.47357e-11	2.82469e-11	3.38803e-07	1.27709e-11	2.66039e-10	1.60287e-11	5.64938e-15	3.38634e-07	9.23155e-11	1.27709e-11	4.73336e-05	1.66829e-08	0.000272612	3.7713e-05		1.78333	1.78333		0.00146327	6.84572e-07	0.00913008	-0.00141814
5	2022-03-21 11:14:38	146742	3.52276e-11	2.85028e-11	3.7383e-07	3.65821e-11	2.42834e-10	2.28275e-11	5.70056e-15	3.73643e-07	8.42634e-11	3.65821e-11	6.10944e-05	1.52567e-08	0.000225518	9.79065e-05		2.2	2.2		0.00148586	6.91226e-07	0.00923385	-0.00138989
6	2022-03-21 11:15:06	174850	7.86898e-12	2.47556e-11	3.74458e-07	4.02801e-11	8.17443e-10	5.0991e-12	4.95112e-15	3.74271e-07	2.83653e-10	4.02801e-11	1.36241e-05	1.32287e-08	0.000757881	0.000107623		2.66667	2.66667		0.00150329	6.97873e-07	0.00946331	-0.00134193
7	2022-03-21 11:15:41	209838	1.10127e-08	3.38982e-11	3.35758e-07	1.89608e-10	4.65012e-09	7.13623e-09	6.77964e-15	3.3559e-07	1.61359e-09	1.89608e-10	0.0212647	2.02021e-08	0.00480822	0.000564999		3.25	3.25		0.00770947	7.07623e-07	0.0110868	-0.00114575
8	2022-03-21 11:16:02	230255	1.144e-08	4.2959e-11	3.56899e-07	1.93768e-10	4.6112e-09	7.41312e-09	8.5918e-15	3.56721e-07	1.60009e-09	1.93768e-10	0.0207813	2.40855e-08	0.00448555	0.000543193		3.6	3.6		0.0150675	7.15374e-07	0.0127132	-0.000951815
9	2022-03-21 11:16:19	247421	1.20513e-08	5.26134e-11	3.66216e-07	1.84899e-10	3.91668e-09	7.80924e-09	1.05227e-14	3.66033e-07	1.35909e-09	1.84899e-10	0.0213348	2.87479e-08	0.00371302	0.000505143		3.88333	3.88333		0.021034	7.22858e-07	0.0138746	-0.000803301
10	2022-03-21 11:16:36	264586	1.27905e-08	4.34913e-11	3.66753e-07	1.94843e-10	3.0884e-09	8.28824e-09	8.69826e-15	3.6657e-07	1.07167e-09	1.94843e-10	0.0226103	2.37288e-08	0.00292352	0.000531531		4.16667	4.16667		0.0272595	7.30293e-07	0.0148148	-0.000656439
11	2022-03-21 11:16:53	281753	1.29295e-08	5.22142e-11	3.65051e-07	1.72612e-10	2.44105e-09	8.37832e-09	1.04428e-14	3.64868e-07	8.47044e-10	1.72612e-10	0.0229626	2.86208e-08	0.00232151	0.00047308		4.45	4.45		0.0337157	7.37709e-07	0.0155579	-0.000514119
12	2022-03-21 11:17:10	298919	1.31929e-08	4.62249e-11	3.63349e-07	1.713e-10	1.97306e-09	8.549e-09	9.24498e-15	3.63167e-07	6.84652e-10	1.713e-10	0.0235401	2.54565e-08	0.00188522	0.000471683		4.73333	4.73333		0.0403036	7.4537e-07	0.0161538	-0.000380277
13	2022-03-21 11:17:28	316085	1.35106e-08	5.45587e-11	3.67022e-07	1.47812e-10	1.55151e-09	8.75487e-09	1.09117e-14	3.66838e-07	5.38374e-10	1.47812e-10	0.0238657	2.97454e-08	0.0014676	0.000402935		5.03333	5.03333		0.0474144	7.5365e-07	0.0166567	-0.000249085
14	2022-03-21 11:17:45	333251	1.04489e-08	4.31534e-11	3.42118e-07	8.84401e-11	1.06934e-09	6.77089e-09	8.63068e-15	3.41947e-07	3.71061e-10	8.84401e-11	0.019801	2.52398e-08	0.00108514	0.000258637		5.31667	5.31667		0.0536006	7.6144e-07	0.0170184	-0.000155362
15	2022-03-21 11:18:05	353007	4.65182e-09	3.98772e-11	3.30651e-07	6.18124e-11	8.154e-10	3.01438e-09	7.97544e-15	3.30486e-07	2.82944e-10	6.18124e-11	0.00912106	2.41325e-08	0.000856145	0.000187035		5.65	5.65		0.0584209	7.69668e-07	0.0173419	-8.10832e-05
16	2022-03-21 11:18:24	372274	2.48313e-09	4.55799e-11	3.35578e-07	3.23144e-11	6.64717e-10	1.60907e-09	9.11598e-15	3.3541e-07	2.30657e-10	3.23144e-11	0.00479731	2.71786e-08	0.000687686	9.63429e-05		5.96667	5.96667		0.0606246	7.77793e-07	0.0175864	-3.6215e-05
17	2022-03-21 11:18:43	391540	1.41651e-09	3.47275e-11	3.52241e-07	2.51442e-11	5.70117e-10	9.17898e-10	6.9455e-15	3.52065e-07	1.97831e-10	2.51442e-11	0.00260719	1.97279e-08	0.000561915	7.14192e-05		6.28333	6.28333		0.061797	7.8522e-07	0.0177842	-9.65267e-06
18	2022-03-21 11:19:13	421598	6.11405e-10	3.81982e-11	3.62991e-07	1.59099e-11	4.82874e-10	3.9619e-10	7.63964e-15	3.6281e-07	1.67557e-10	1.59099e-11	0.00109201	2.10569e-08	0.000461833	4.38519e-05		6.78333	6.78333		0.0627218	7.95416e-07	0.0180401	1.91651e-05
19	2022-03-21 11:19:41	449705	2.8424e-10	3.69287e-11	1.96903e-07	-3.26799e-12	7.19471e-10	1.84188e-10	7.38574e-15	1.96805e-07	2.49656e-10	-3.26799e-12	0.000935891	3.75283e-08	0.00126855	-1.66053e-05		7.25	7.25		0.063195	8.09086e-07	0.0184439	2.55227e-05
20	2022-03-21 11:20:09	477811	1.17819e-10	3.10521e-11	6.33588e-08	-2.14677e-11	7.40436e-10	7.63467e-11	6.21042e-15	6.33271e-08	2.56931e-10	-2.14677e-11	0.00120559	9.80689e-08	0.00405721	-0.000338997		7.71667	7.71667		0.0636947	8.40725e-07	0.0196866	-5.74512e-05
21	2022-03-21 11:20:38	506940	7.01758e-11	4.39213e-11	2.35245e-08	-1.61572e-11	6.88736e-10	4.54739e-11	8.78426e-15	2.35127e-08	2.38991e-10	-1.61572e-11	0.00193401	3.73596e-07	0.0101643	-0.000687168		8.2	8.2		0.0644534	9.54711e-07	0.0231235	-0.000305441
22	2022-03-21 11:21:07	535546	4.41286e-11	3.82904e-11	1.1423e-08	4.55799e-12	6.28466e-10	2.85953e-11	7.65808e-15	1.14173e-08	2.18078e-10	4.55799e-12	0.00250456	6.70744e-07	0.0191007	0.000399218		8.68333	8.68333		0.0655261	1.20709e-06	0.0301958	-0.000375029
23	2022-03-21 11:21:36	564153	3.87859e-11	3.34477e-11	7.77018e-09	4.89124e-12	5.83348e-10	2.51333e-11	6.68954e-15	7.76629e-09	2.02422e-10	4.89124e-12	0.0032362	8.61355e-07	0.0260641	0.000629804		9.16667	9.16667		0.0669134	1.57735e-06	0.0411107	-0.000126349
24	2022-03-21 11:22:04	592760	4.42039e-11	3.9908e-11	6.46342e-09	3.13899e-12	5.30749e-10	2.86441e-11	7.9816e-15	6.46019e-09	1.8417e-10	3.13899e-12	0.00443395	1.23551e-06	0.0285084	0.000485898		9.63333	9.63333		0.0687031	2.06662e-06	0.0538443	0.000133982
25	2022-03-21 11:22:36	624487	2.70039e-11	3.20247e-11	6.04475e-09	-2.12849e-12	4.94376e-10	1.74985e-11	6.40494e-15	6.04173e-09	1.71548e-10	-2.12849e-12	0.00289628	1.06012e-06	0.0283939	-0.000352298		10.1667	10.1667		0.0706578	2.67878e-06	0.0690182	0.000169608
26	2022-03-21 11:23:07	655195	4.09251e-11	3.78501e-11	5.84396e-09	9.83623e-12	4.75349e-10	2.65195e-11	7.57002e-15	5.84104e-09	1.64946e-10	9.83623e-12	0.0045402	1.29601e-06	0.0282392	0.00168399		10.6833	10.6833		0.0725789	3.28745e-06	0.0836484	0.000513628
27	2022-03-21 11:23:37	685901	3.10997e-11	3.98158e-11	5.74875e-09	1.90167e-11	4.49671e-10	2.01526e-11	7.96316e-15	5.74588e-09	1.56036e-10	1.90167e-11	0.00350732	1.38589e-06	0.0271561	0.00330963		11.1833	11.1833		0.0745908	3.95792e-06	0.0974973	0.00176203
28	2022-03-21 11:24:08	716608	2.27577e-11	3.1349e-11	5.67954e-09	-2.05217e-11	4.23388e-10	1.4747e-11	6.2698e-15	5.6767e-09	1.46916e-10	-2.05217e-11	0.00259781	1.10448e-06	0.0258805	-0.00361508		11.7	11.7		0.076168	4.60127e-06	0.111198	0.00168312
29	2022-03-21 11:24:39	747315	1.78234e-11	4.50577e-11	5.64882e-09	-5.11699e-12	4.19725e-10	1.15496e-11	9.01154e-15	5.646e-09	1.45645e-10	-5.11699e-12	0.00204562	1.59609e-06	0.0257961	-0.000906304		12.2167	12.2167		0.0773675	5.29892e-06	0.124548	0.0005151
30	2022-03-21 11:25:10	778021	2.02852e-11	3.79218e-11	5.59708e-09	-1.14057e-11	4.04222e-10	1.31448e-11	7.58436e-15	5.59428e-09	1.40265e-10	-1.14057e-11	0.00234969	1.35573e-06	0.0250729	-0.00203881		12.7333	12.7333		0.078503	6.06147e-06	0.137689	-0.000245722
31	2022-03-21 11:25:40	808730	3.95276e-11	3.9478e-11	5.5825e-09	2.16289e-11	3.73569e-10	2.56139e-11	7.8956e-15	5.57971e-09	1.29628e-10	2.16289e-11	0.00459054	1.41506e-06	0.0232321	0.00387635		13.2333	13.2333		0.080238	6.75417e-06	0.149766	0.000213662
32	2022-03-21 11:26:11	839436	3.06804e-11	4.10853e-11	5.53057e-09	-1.54262e-11	3.75673e-10	1.98809e-11	8.21706e-15	5.5278e-09	1.30359e-10	-1.54262e-11	0.00359653	1.4865e-06	0.0235823	-0.00279066		13.75	13.75		0.082353	7.50374e-06	0.161859	0.000494132
33	2022-03-21 11:26:42	870143	5.26749e-12	3.81675e-11	5.52719e-09	-1.92209e-11	3.76717e-10	3.41333e-12	7.6335e-15	5.52443e-09	1.30721e-10	-1.92209e-11	0.000617862	1.38177e-06	0.0236623	-0.00347926		14.2667	14.2667		0.0834417	8.24471e-06	0.174064	-0.0011256
34	2022-03-21 11:27:12	900850	1.46522e-11	3.5997e-11	5.52009e-09	7.04123e-12	3.58542e-10	9.49463e-12	7.1994e-15	5.51733e-09	1.24414e-10	7.04123e-12	0.00172087	1.30487e-06	0.0225497	0.0012762		14.7667	14.7667		0.0840264	8.91637e-06	0.185617	-0.00167636
35	2022-03-21 11:27:43	931557	3.35721e-11	3.75839e-11	5.50794e-09	2.25319e-11	3.4747e-10	2.17547e-11	7.51678e-15	5.50519e-09	1.20572e-10	2.25319e-11	0.00395168	1.3654e-06	0.0219015	0.00409285		15.2833	15.2833		0.0854918	9.60619e-06	0.1971	-0.000289354
36	2022-03-21 11:28:14	962265	3.91191e-11	4.21194e-11	5.48433e-09	-2.57569e-11	3.45558e-10	2.53492e-11	8.42388e-15	5.48159e-09	1.19909e-10	-2.57569e-11	0.00462442	1.53676e-06	0.0218748	-0.0046988		15.8	15.8		0.0877073	1.03559e-05	0.208409	-0.000445891
37	2022-03-21 11:28:44	992971	2.24997e-11	3.36013e-11	5.46203e-09	-2.30157e-11	3.45082e-10	1.45798e-11	6.72026e-15	5.4593e-09	1.19743e-10	-2.30157e-11	0.00267064	1.23097e-06	0.0219339	-0.00421587		16.3	16.3		0.0895311	1.10478e-05	0.219361	-0.00267456
38	2022-03-21 11:29:15	1023678	2.34349e-11	3.22704e-11	5.48761e-09	-1.55337e-11	3.46264e-10	1.51858e-11	6.45408e-15	5.48487e-09	1.20154e-10	-1.55337e-11	0.00276868	1.17671e-06	0.0219064	-0.0028321		16.8167	16.8167		0.0909363	1.16698e-05	0.230687	-0.00449529
39	2022-03-21 11:29:46	1054385	2.52194e-11	3.98466e-11	5.47226e-09	-3.31206e-11	3.41803e-10	1.63422e-11	7.96932e-15	5.46952e-09	1.18606e-10	-3.31206e-11	0.00298786	1.45704e-06	0.0216848	-0.00605548		17.3333	17.3333		0.0924234	1.23502e-05	0.241948	-0.00679125
40	2022-03-21 11:30:17	1085092	2.34457e-11	3.71539e-11	5.43621e-09	-1.36309e-11	3.33649e-10	1.51928e-11	7.43078e-15	5.43349e-09	1.15776e-10	-1.36309e-11	0.00279614	1.36759e-06	0.0213079	-0.00250868		17.85	17.85		0.0939176	1.30799e-05	0.253054	-0.00900365
41	2022-03-21 11:30:47	1115800	3.36044e-11	3.97339e-11	5.47328e-09	1.97477e-11	3.39008e-10	2.17757e-11	7.94678e-15	5.47054e-09	1.17636e-10	1.97477e-11	0.00398053	1.45265e-06	0.0215035	0.00360982		18.35	18.35		0.0956117	1.3785e-05	0.263757	-0.00872837
42	2022-03-21 11:31:18	1146506	2.08764e-11	4.2099e-11	5.42593e-09	-3.74206e-11	3.36927e-10	1.35279e-11	8.4198e-15	5.42322e-09	1.16914e-10	-3.74206e-11	0.00249444	1.55255e-06	0.021558	-0.00690007		18.8667	18.8667		0.0972844	1.45613e-05	0.274881	-0.00957835
43	2022-03-21 11:31:49	1177213	2.57462e-11	3.75225e-11	5.42123e-09	-7.55723e-12	3.27682e-10	1.66835e-11	7.5045e-15	5.41852e-09	1.13706e-10	-7.55723e-12	0.00307898	1.38497e-06	0.0209846	-0.0013947		19.3833	19.3833		0.0987242	1.53202e-05	0.285872	-0.0117212
44	2022-03-21 11:32:19	1207920	2.44239e-11	4.12287e-11	5.44925e-09	4.68699e-12	3.28174e-10	1.58267e-11	8.24574e-15	5.44653e-09	1.13876e-10	4.68699e-12	0.00290583	1.51395e-06	0.0209081	0.000860547		19.8833	19.8833		0.10022	1.60449e-05	0.296345	-0.0118547
45	2022-03-21 11:32:50	1238627	2.22202e-11	3.87204e-11	5.11377e-09	1.22334e-11	3.22176e-10	1.43987e-11	7.74408e-15	5.11121e-09	1.11795e-10	1.22334e-11	0.00281708	1.51512e-06	0.0218725	0.00239344		20.4	20.4		0.101699	1.68274e-05	0.307396	-0.0110141
46	2022-03-21 11:33:21	1269335	2.57569e-11	2.91785e-11	5.17072e-09	7.62173e-12	3.28896e-10	1.66905e-11	5.8357e-15	5.16813e-09	1.14127e-10	7.62173e-12	0.0032295	1.12917e-06	0.0220828	0.00147475		20.9167	20.9167		0.103261	1.75105e-05	0.318752	-0.0100148
47	2022-03-21 11:33:52	1300041	2.97344e-11	3.15537e-11	5.42135e-09	1.61572e-11	3.23206e-10	1.92679e-11	6.31074e-15	5.41864e-09	1.12152e-10	1.61572e-11	0.00355585	1.16464e-06	0.0206975	0.00298178		21.4333	21.4333		0.105014	1.81031e-05	0.329803	-0.00886354
48	2022-03-21 11:34:22	1330748	3.56684e-11	5.70875e-11	1.00333e-07	-1.93607e-11	3.85417e-10	2.31131e-11	1.14175e-14	1.00283e-07	1.3374e-10	-1.93607e-11	0.000230479	1.13853e-07	0.00133363	-0.000193061		21.9333	21.9333		0.10596	1.84227e-05	0.335311	-0.00816636
49	2022-03-21 11:34:54	1362996	3.35399e-11	3.20349e-11	2.79409e-07	-1.39212e-11	3.19735e-10	2.17339e-11	6.40698e-15	2.79269e-07	1.10948e-10	-1.39212e-11	7.7824e-05	2.29419e-08	0.00039728	-4.98487e-05		22.4667	22.4667		0.106043	1.84592e-05	0.335773	-0.00823113
50	2022-03-21 11:35:23	1391103	1.99949e-11	2.94856e-11	3.25455e-07	1.46199e-12	3.04132e-10	1.29567e-11	5.89712e-15	3.25292e-07	1.05534e-10	1.46199e-12	3.98309e-05	1.81287e-08	0.000324428	4.49439e-06		22.95	22.95		0.106071	1.84691e-05	0.335947	-0.00824209
51	2022-03-21 11:35:51	1419210	1.56734e-11	2.30664e-11	3.66305e-07	-1.62109e-11	2.75199e-10	1.01564e-11	4.61328e-15	3.66122e-07	9.54941e-11	-1.62109e-11	2.77404e-05	1.26004e-08	0.000260826	-4.42773e-05		23.4167	23.4167		0.106087	1.84763e-05	0.336084	-0.00825137
52	2022-03-21 11:36:19	1447317	1.40964e-10	3.89968e-11	3.4812e-07	5.29436e-11	1.43164e-09	9.13447e-11	7.79936e-15	3.47946e-07	4.96779e-10	5.29436e-11	0.000262525	2.24154e-08	0.00142775	0.00015216		23.8833	23.8833		0.106154	1.84844e-05	0.336478	-0.0082262
53	2022-03-21 11:36:52	1480755	9.07635e-09	4.42796e-11	3.29666e-07	1.22893e-10	2.0575e-09	5.88147e-09	8.85592e-15	3.29501e-07	7.13952e-10	1.22893e-10	0.0178496	2.68767e-08	0.00216677	0.000372967		24.4333	24.4333		0.111135	1.8498e-05	0.337466	-0.00808179
54	2022-03-21 11:37:15	1503783	1.10717e-08	4.39009e-11	3.37818e-07	1.12638e-10	1.6784e-09	7.17446e-09	8.78018e-15	3.37649e-07	5.82405e-10	1.12638e-10	0.0212483	2.60039e-08	0.00172488	0.000333595		24.8167	24.8167		0.118629	1.85081e-05	0.338212	-0.00794637
55	2022-03-21 11:37:35	1523159	1.19566e-08	4.19147e-11	3.38176e-07	1.21442e-10	1.31779e-09	7.74788e-09	8.38294e-15	3.38007e-07	4.57273e-10	1.21442e-10	0.0229222	2.48011e-08	0.00135285	0.000359289		25.15	25.15		0.125991	1.85166e-05	0.338725	-0.00783089
56	2022-03-21 11:37:54	1542535	1.22219e-08	4.06349e-11	3.35578e-07	1.15229e-10	1.09063e-09	7.91979e-09	8.12698e-15	3.3541e-07	3.78449e-10	1.15229e-10	0.0236123	2.423e-08	0.00112832	0.000343546		25.4667	25.4667		0.133359	1.85244e-05	0.339118	-0.00771961
57	2022-03-21 11:38:13	1561911	1.23422e-08	3.9652e-11	3.34682e-07	1.24904e-10	9.09586e-10	7.99775e-09	7.9304e-15	3.34515e-07	3.15626e-10	1.24904e-10	0.0239085	2.37072e-08	0.000943535	0.000373389		25.7833	25.7833		0.140883	1.8532e-05	0.339446	-0.00760609
58	2022-03-21 11:38:33	1581286	1.20453e-08	5.58282e-11	3.42745e-07	7.24118e-11	7.85114e-10	7.80535e-09	1.11656e-14	3.42574e-07	2.72435e-10	7.24118e-11	0.0227845	3.25934e-08	0.000795258	0.000211376		26.1167	26.1167		0.148665	1.85413e-05	0.339736	-0.00750863
59	2022-03-21 11:38:55	1603253	6.24634e-09	2.8984e-11	3.11212e-07	6.92728e-11	5.51873e-10	4.04763e-09	5.7968e-15	3.11056e-07	1.915e-10	6.92728e-11	0.0130125	1.86358e-08	0.000615644	0.000222702		26.4833	26.4833		0.155228	1.85507e-05	0.339994	-0.00742905
60	2022-03-21 11:39:16	1624730	3.01273e-09	3.21066e-11	3.12466e-07	4.19249e-11	4.71594e-10	1.95225e-09	6.42132e-15	3.1231e-07	1.63643e-10	4.19249e-11	0.006251	2.05607e-08	0.000523977	0.000134241		26.8333	26.8333		0.158599	1.85576e-05	0.340194	-0.00736658
61	2022-03-21 11:39:38	1646206	1.59093e-09	2.95778e-11	3.32353e-07	1.85974e-11	4.32064e-10	1.03092e-09	5.91556e-15	3.32187e-07	1.49926e-10	1.85974e-11	0.00310344	1.78079e-08	0.000451331	5.59848e-05		27.2	27.2		0.160314	1.85646e-05	0.340372	-0.00733171
62	2022-03-21 11:40:07	1675223	7.02049e-10	2.04761e-11	3.50987e-07	1.67484e-11	3.68056e-10	4.54928e-10	4.09522e-15	3.50812e-07	1.27715e-10	1.67484e-11	0.00129679	1.16736e-08	0.000364057	4.77419e-05		27.6833	27.6833		0.161377	1.85718e-05	0.34057	-0.00730664
63	2022-03-21 11:40:35	1703330	3.75378e-10	4.26928e-11	2.4277e-07	1.75224e-11	5.97936e-10	2.43245e-10	8.53856e-15	2.42649e-07	2.07484e-10	1.75224e-11	0.00100246	3.5189e-08	0.000855079	7.22131e-05		28.15	28.15		0.161914	1.85827e-05	0.340854	-0.00727865
64	2022-03-21 11:41:03	1731436	1.65001e-10	2.37932e-11	8.16102e-08	-1.52649e-12	6.77771e-10	1.06921e-10	4.75864e-15	8.15694e-08	2.35187e-10	-1.52649e-12	0.00131079	5.83385e-08	0.00288327	-1.8714e-05		28.6167	28.6167		0.162454	1.86045e-05	0.341726	-0.00726617
65	2022-03-21 11:41:31	1759543	8.54731e-11	3.52599e-11	2.86324e-08	-3.50449e-12	6.64449e-10	5.53866e-11	7.05198e-15	2.86181e-08	2.30564e-10	-3.50449e-12	0.00193537	2.46417e-07	0.00805658	-0.000122457		29.0833	29.0833		0.163211	1.86756e-05	0.344279	-0.00729911
66	2022-03-21 11:42:00	1788670	6.07911e-11	4.28053e-11	1.3022e-08	1.55122e-11	6.13524e-10	3.93926e-11	8.56106e-15	1.30155e-08	2.12893e-10	1.55122e-11	0.0030266	6.57759e-07	0.0163569	0.00119183		29.5667	29.5667		0.16441	1.88941e-05	0.350179	-0.00704068
67	2022-03-21 11:42:29	1817277	4.05166e-11	2.47454e-11	8.29263e-09	1.05242e-11	5.57601e-10	2.62548e-11	4.94908e-15	8.28848e-09	1.93488e-10	1.05242e-11	0.00316762	5.97103e-07	0.0233441	0.00126974		30.05	30.05		0.165907	1.91974e-05	0.359773	-0.0064458
68	2022-03-21 11:42:57	1845885	4.73751e-11	2.72947e-11	6.64583e-09	6.99823e-12	5.11031e-10	3.06991e-11	5.45894e-15	6.64251e-09	1.77328e-10	6.99823e-12	0.00462161	8.21819e-07	0.0266959	0.00105355		30.5167	30.5167		0.167725	1.95285e-05	0.371449	-0.0059037
69	2022-03-21 11:43:29	1877612	3.79904e-11	3.47582e-11	6.14211e-09	2.78747e-11	4.8811e-10	2.46178e-11	6.95164e-15	6.13904e-09	1.69374e-10	2.78747e-11	0.00401004	1.13237e-06	0.0275897	0.00454056		31.05	31.05		0.170026	2.00496e-05	0.385925	-0.00441193
70	2022-03-21 11:44:00	1908320	3.44751e-11	3.63042e-11	5.93317e-09	-1.52542e-11	4.70051e-10	2.23399e-11	7.26084e-15	5.9302e-09	1.63108e-10	-1.52542e-11	0.00376713	1.22438e-06	0.0275046	-0.00257229		31.5667	31.5667		0.172035	2.06584e-05	0.400158	-0.00390346
71	2022-03-21 11:44:31	1939026	3.70014e-11	2.24726e-11	5.84227e-09	1.85222e-11	4.30944e-10	2.39769e-11	4.49452e-15	5.83935e-09	1.49538e-10	1.85222e-11	0.00410609	7.69695e-07	0.0256086	0.00317196		32.0833	32.0833		0.174069	2.11736e-05	0.413879	-0.00374855
72	2022-03-21 11:45:01	1969733	1.72537e-11	4.59587e-11	5.75813e-09	8.50323e-12	4.31143e-10	1.11804e-11	9.19174e-15	5.75525e-09	1.49607e-10	8.50323e-12	0.00194264	1.5971e-06	0.0259948	0.00147747		32.5833	32.5833		0.175582	2.17653e-05	0.42678	-0.00258619
73	2022-03-21 11:45:32	2000440	4.11831e-11	5.1907e-11	5.70682e-09	-5.10624e-12	4.19334e-10	2.66866e-11	1.03814e-14	5.70397e-09	1.45509e-10	-5.10624e-12	0.00467861	1.82003e-06	0.0255101	-0.000895209		33.1	33.1		0.177292	2.2648e-05	0.440085	-0.00243577
74	2022-03-21 11:46:03	2031147	2.62944e-11	4.46072e-11	5.66031e-09	-1.57272e-11	4.04015e-10	1.70388e-11	8.92144e-15	5.65748e-09	1.40193e-10	-1.57272e-11	0.00301172	1.57693e-06	0.0247802	-0.0027799		33.6167	33.6167		0.179279	2.35256e-05	0.453077	-0.00338517
75	2022-03-21 11:46:33	2061854	2.54022e-11	3.80447e-11	5.64128e-09	-4.36449e-12	3.82392e-10	1.64606e-11	7.60894e-15	5.63846e-09	1.3269e-10	-4.36449e-12	0.00291935	1.34947e-06	0.023533	-0.000774057		34.1167	34.1167		0.180762	2.42572e-05	0.465155	-0.00427366
76	2022-03-21 11:47:04	2092561	3.91944e-11	4.92451e-11	5.60773e-09	-3.32174e-12	3.7995e-10	2.5398e-11	9.84902e-15	5.60493e-09	1.31843e-10	-3.32174e-12	0.00453137	1.75721e-06	0.0235226	-0.000592647		34.6333	34.6333		0.182686	2.50597e-05	0.477311	-0.00462673
77	2022-03-21 11:47:35	2123268	4.00544e-11	4.63068e-11	5.57473e-09	5.46099e-12	3.76932e-10	2.59553e-11	9.26136e-15	5.57194e-09	1.30795e-10	5.46099e-12	0.00465821	1.66214e-06	0.0234739	0.000980087		35.15	35.15		0.18506	2.59431e-05	0.489452	-0.00452664
78	2022-03-21 11:48:05	2153975	3.39914e-11	4.10547e-11	5.56101e-09	-1.05672e-11	3.693e-10	2.20264e-11	8.21094e-15	5.55823e-09	1.28147e-10	-1.05672e-11	0.00396285	1.47726e-06	0.0230554	-0.00190118		35.65	35.65		0.187216	2.67279e-05	0.501084	-0.00475691
79	2022-03-21 11:48:36	2184682	2.50582e-11	3.3499e-11	5.55933e-09	3.92374e-12	3.63771e-10	1.62377e-11	6.6998e-15	5.55655e-09	1.26229e-10	3.92374e-12	0.00292227	1.20575e-06	0.0227171	0.000706147		36.1667	36.1667		0.188994	2.7421e-05	0.512909	-0.00506563
80	2022-03-21 11:49:07	2215390	2.86702e-11	3.9693e-11	5.56244e-09	1.65012e-11	3.60907e-10	1.85783e-11	7.9386e-15	5.55966e-09	1.25235e-10	1.65012e-11	0.00334162	1.42789e-06	0.0225256	0.00296802		36.6833	36.6833		0.190612	2.81014e-05	0.524597	-0.00411647
81	2022-03-21 11:49:38	2246096	5.38359e-11	3.55568e-11	5.53347e-09	8.79348e-12	3.57398e-10	3.48857e-11	7.11136e-15	5.5307e-09	1.24017e-10	8.79348e-12	0.00630764	1.2858e-06	0.0224234	0.00158994		37.2	37.2		0.193105	2.88024e-05	0.536208	-0.00293899
82	2022-03-21 11:50:08	2276803	2.27684e-11	4.49349e-11	5.52733e-09	-1.71999e-12	3.44368e-10	1.47539e-11	8.98698e-15	5.52457e-09	1.19496e-10	-1.71999e-12	0.0026706	1.62673e-06	0.0216299	-0.000311335		37.7	37.7		0.19535	2.95305e-05	0.547222	-0.00261934
83	2022-03-21 11:50:39	2307510	3.10352e-11	3.87306e-11	5.52377e-09	1.61572e-11	3.4413e-10	2.01108e-11	7.74612e-15	5.52101e-09	1.19413e-10	1.61572e-11	0.0036426	1.40303e-06	0.0216289	0.00292649		38.2167	38.2167		0.196981	3.03132e-05	0.558397	-0.00194376
84	2022-03-21 11:51:10	2338217	3.24756e-11	4.43615e-11	5.50838e-09	-1.19109e-11	3.44636e-10	2.10442e-11	8.8723e-15	5.50563e-09	1.19589e-10	-1.19109e-11	0.00382231	1.6115e-06	0.0217212	-0.00216341		38.7333	38.7333		0.198909	3.1092e-05	0.569596	-0.00174663
85	2022-03-21 11:51:40	2368925	1.56734e-11	4.17815e-11	5.50708e-09	1.15239e-11	3.34509e-10	1.01564e-11	8.3563e-15	5.50433e-09	1.16075e-10	1.15239e-11	0.00184516	1.51813e-06	0.0210879	0.00209361		39.2333	39.2333		0.200326	3.18744e-05	0.580298	-0.00176408
86	2022-03-21 11:52:11	2399631	2.11774e-11	2.47351e-11	5.53012e-09	1.54907e-11	3.33057e-10	1.3723e-11	4.94702e-15	5.52735e-09	1.15571e-10	1.54907e-11	0.00248273	8.95007e-07	0.0209089	0.00280255		39.75	39.75		0.201444	3.24978e-05	0.591147	-0.000499236
87	2022-03-21 11:52:42	2430338	2.94549e-11	3.99899e-11	5.46263e-09	-2.92507e-11	3.33257e-10	1.90868e-11	7.99798e-15	5.4599e-09	1.1564e-10	-2.92507e-11	0.00349581	1.46486e-06	0.0211799	-0.00535737		40.2667	40.2667		0.202988	3.31074e-05	0.60202	-0.00115923
88	2022-03-21 11:53:13	2461045	2.37467e-11	5.0832e-11	5.51389e-09	1.71784e-11	3.40152e-10	1.53879e-11	1.01664e-14	5.51113e-09	1.18033e-10	1.71784e-11	0.00279214	1.8447e-06	0.0214171	0.00311704		40.7833	40.7833		0.204613	3.39624e-05	0.613024	-0.00173798
89	2022-03-21 11:53:43	2491752	2.04679e-11	3.2731e-11	5.26928e-09	3.93449e-12	3.25041e-10	1.32632e-11	6.5462e-15	5.26665e-09	1.12789e-10	3.93449e-12	0.00251834	1.24295e-06	0.0214158	0.000747058		41.2833	41.2833		0.20594	3.47343e-05	0.623733	-0.00077196
90	2022-03-21 11:54:14	2522460	2.93044e-11	3.87306e-11	5.12733e-09	-6.07374e-12	3.27859e-10	1.89893e-11	7.74612e-15	5.12477e-09	1.13767e-10	-6.07374e-12	0.00370539	1.51151e-06	0.0221995	-0.00118517		41.8	41.8		0.207548	3.54459e-05	0.635	-0.00088514
91	2022-03-21 11:54:45	2553166	1.46629e-11	3.80753e-11	5.43277e-09	-2.45422e-11	3.18806e-10	9.50156e-12	7.61506e-15	5.43005e-09	1.10626e-10	-2.45422e-11	0.00174981	1.40239e-06	0.0203729	-0.0045197		42.3167	42.3167		0.208957	3.61986e-05	0.645998	-0.0023589
92	2022-03-21 11:55:15	2583873	1.70279e-11	3.82391e-11	4.78945e-08	9.90073e-12	3.7995e-10	1.10341e-11	7.64782e-15	4.78706e-08	1.31843e-10	9.90073e-12	0.000230498	1.5976e-07	0.00275415	0.000206823		42.8167	42.8167		0.209452	3.65892e-05	0.651779	-0.00343712
93	2022-03-21 11:55:47	2615600	2.59827e-11	2.67726e-11	2.5576e-07	4.92349e-12	3.23881e-10	1.68368e-11	5.35452e-15	2.55632e-07	1.12387e-10	4.92349e-12	6.58634e-05	2.09462e-08	0.000439642	1.92601e-05		43.35	43.35		0.209532	3.66373e-05	0.652631	-0.00337683
94	2022-03-21 11:56:16	2644727	2.40692e-11	2.96802e-11	3.31009e-07	3.47224e-11	3.0414e-10	1.55968e-11	5.93604e-15	3.30843e-07	1.05537e-10	3.47224e-11	4.71427e-05	1.79421e-08	0.000318992	0.000104951		43.8333	43.8333		0.209559	3.66467e-05	0.652814	-0.00334681
95	2022-03-21 11:56:44	2672835	2.68104e-11	1.43332e-11	3.53495e-07	1.75224e-12	2.82202e-10	1.73731e-11	2.86664e-15	3.53318e-07	9.79241e-11	1.75224e-12	4.91714e-05	8.11348e-09	0.000277155	4.95938e-06		44.3	44.3		0.209581	3.66528e-05	0.652954	-0.00332116
96	2022-03-21 11:57:12	2700941	2.62622e-11	3.10623e-11	3.67112e-07	4.67194e-11	8.59021e-10	1.70179e-11	6.21246e-15	3.66928e-07	2.9808e-10	4.67194e-11	4.63794e-05	1.6931e-08	0.000812366	0.000127326		44.7667	44.7667		0.209604	3.66587e-05	0.653208	-0.0032903
97	2022-03-21 11:57:46	2734379	8.25018e-09	5.51423e-11	3.24559e-07	1.06575e-10	1.94586e-09	5.34612e-09	1.10285e-14	3.24397e-07	6.75213e-10	1.06575e-10	0.0164802	3.39968e-08	0.00208144	0.000328533		45.3333	45.3333		0.214286	3.66731e-05	0.654028	-0.00316114
98	2022-03-21 11:58:07	2755855	1.01562e-08	3.38266e-11	3.33697e-07	1.0335e-10	1.65472e-09	6.58122e-09	6.76532e-15	3.3353e-07	5.74188e-10	1.0335e-10	0.019732	2.0284e-08	0.00172155	0.000309867		45.6833	45.6833		0.220623	3.66826e-05	0.654693	-0.00304942
99	2022-03-21 11:58:30	2778882	1.15098e-08	4.8078e-11	3.36384e-07	1.32515e-10	1.26809e-09	7.45835e-09	9.6156e-15	3.36216e-07	4.40027e-10	1.32515e-10	0.0221832	2.85995e-08	0.00130876	0.000394137		46.0667	46.0667		0.228657	3.6692e-05	0.655274	-0.00291448
100	2022-03-21 11:58:50	2798259	1.19767e-08	4.10853e-11	3.34592e-07	1.30429e-10	1.04375e-09	7.7609e-09	8.21706e-15	3.34425e-07	3.62181e-10	1.30429e-10	0.0232067	2.45707e-08	0.001083	0.00039001		46.4	46.4		0.236222	3.67008e-05	0.655673	-0.00278379
101	2022-03-21 11:59:06	2814385	1.20279e-08	3.7973e-11	3.33428e-07	1.21249e-10	8.71971e-10	7.79408e-09	7.5946e-15	3.33261e-07	3.02574e-10	1.21249e-10	0.0233873	2.27887e-08	0.000907918	0.000363826		46.6667	46.6667		0.242435	3.67071e-05	0.655938	-0.00268328
102	2022-03-21 11:59:25	2833761	1.23417e-08	4.46482e-11	3.35399e-07	1.03285e-10	7.49857e-10	7.99742e-09	8.92964e-15	3.35231e-07	2.602e-10	1.03285e-10	0.0238564	2.66373e-08	0.000776182	0.000308101		46.9833	46.9833		0.249915	3.6715e-05	0.656205	-0.00257689
103	2022-03-21 11:59:45	2853136	1.06296e-08	2.91683e-11	3.1793e-07	6.87568e-11	5.66378e-10	6.88798e-09	5.83366e-15	3.17771e-07	1.96533e-10	6.87568e-11	0.0216759	1.83581e-08	0.000618474	0.000216372		47.3167	47.3167		0.257504	3.67225e-05	0.656437	-0.00248948
104	2022-03-21 12:00:07	2875104	4.22138e-09	3.81266e-11	3.09778e-07	4.18281e-11	4.80654e-10	2.73545e-09	7.62532e-15	3.09623e-07	1.66787e-10	4.18281e-11	0.00883479	2.46277e-08	0.000538677	0.000135094		47.6833	47.6833		0.263097	3.67303e-05	0.656649	-0.00242505
105	2022-03-21 12:00:28	2896580	2.10867e-09	3.08063e-11	3.22141e-07	7.11648e-12	4.20485e-10	1.36642e-09	6.16126e-15	3.2198e-07	1.45908e-10	7.11648e-12	0.0042438	1.91355e-08	0.00045316	2.21022e-05		48.0333	48.0333		0.265386	3.6738e-05	0.656823	-0.00239754
106	2022-03-21 12:00:50	2918056	1.16192e-09	2.53494e-11	3.42476e-07	1.16744e-11	3.821e-10	7.52924e-10	5.06988e-15	3.42305e-07	1.32589e-10	1.16744e-11	0.00219957	1.4811e-08	0.000387341	3.41053e-05		48.4	48.4		0.266567	3.67442e-05	0.656977	-0.00238723
107	2022-03-21 12:01:19	2947073	5.3193e-10	2.6404e-11	3.52062e-07	2.43379e-11	3.89234e-10	3.44691e-10	5.2808e-15	3.51886e-07	1.35064e-10	2.43379e-11	0.000979552	1.50071e-08	0.000383829	6.91642e-05		48.8833	48.8833		0.267335	3.67514e-05	0.657163	-0.00236228
108	2022-03-21 12:01:47	2975180	2.56559e-10	4.6532e-11	1.54262e-07	9.14823e-12	6.55734e-10	1.6625e-10	9.3064e-15	1.54185e-07	2.2754e-10	9.14823e-12	0.00107825	6.03587e-08	0.00147576	5.93329e-05		49.35	49.35		0.267816	3.6769e-05	0.657597	-0.00233229
109	2022-03-21 12:02:15	3003286	1.25484e-10	4.99618e-11	4.99867e-08	3.68831e-11	6.68419e-10	8.13136e-11	9.99236e-15	4.99617e-08	2.31941e-10	3.68831e-11	0.00162752	2e-07	0.00464238	0.000738227		49.8167	49.8167		0.268447	3.68298e-05	0.659025	-0.00214619
110	2022-03-21 12:02:44	3032415	7.36158e-11	2.32404e-11	1.93354e-08	2.01024e-12	6.22915e-10	4.7703e-11	4.64808e-15	1.93257e-08	2.16152e-10	2.01024e-12	0.00246837	2.40512e-07	0.0111846	0.000104019		50.3	50.3		0.269437	3.69362e-05	0.66285	-0.00194265
111	2022-03-21 12:03:13	3061021	6.27261e-11	3.78809e-11	1.02214e-08	4.29354e-11	5.91564e-10	4.06465e-11	7.57618e-15	1.02163e-08	2.05273e-10	4.29354e-11	0.0039786	7.41578e-07	0.0200927	0.00420264		50.7833	50.7833		0.270995	3.71736e-05	0.670408	-0.000901876
112	2022-03-21 12:03:41	3089628	5.59321e-11	4.11672e-11	7.25275e-09	1.36309e-11	5.23171e-10	3.6244e-11	8.23344e-15	7.24912e-09	1.8154e-10	1.36309e-11	0.00499978	1.13578e-06	0.0250431	0.00188035		51.25	51.25		0.27309	3.76116e-05	0.68094	0.000517489
113	2022-03-21 12:04:13	3121355	3.81194e-11	2.97007e-11	6.38448e-09	-7.22398e-12	4.98354e-10	2.47014e-11	5.94014e-15	6.38129e-09	1.72929e-10	-7.22398e-12	0.00387091	9.30869e-07	0.0270994	-0.00113206		51.7833	51.7833		0.275455	3.81627e-05	0.694845	0.000717034
114	2022-03-21 12:04:44	3152062	4.24409e-11	3.3458e-11	6.04565e-09	1.32762e-11	4.69644e-10	2.75017e-11	6.6916e-15	6.04263e-09	1.62966e-10	1.32762e-11	0.00455128	1.1074e-06	0.0269695	0.00219709		52.3	52.3		0.277631	3.86893e-05	0.708812	0.000992168
115	2022-03-21 12:05:14	3182770	3.33786e-11	3.8362e-11	5.88791e-09	4.00974e-12	4.66296e-10	2.16293e-11	7.6724e-15	5.88497e-09	1.61805e-10	4.00974e-12	0.00367535	1.30373e-06	0.0274946	0.000681353		52.8	52.8		0.279688	3.92921e-05	0.722428	0.00171178
116	2022-03-21 12:05:45	3213476	4.18496e-11	4.12287e-11	5.80219e-09	-2.09624e-11	4.31696e-10	2.71185e-11	8.24574e-15	5.79929e-09	1.49799e-10	-2.09624e-11	0.00467618	1.42185e-06	0.0258305	-0.00361465		53.3167	53.3167		0.281845	3.99962e-05	0.736204	0.000954011
117	2022-03-21 12:06:16	3244183	4.06349e-11	3.76658e-11	5.77677e-09	3.13899e-12	4.13559e-10	2.63314e-11	7.53316e-15	5.77388e-09	1.43505e-10	3.13899e-12	0.00456044	1.3047e-06	0.0248542	0.000543653		53.8333	53.8333		0.284231	4.07005e-05	0.749298	0.00016067
118	2022-03-21 12:06:46	3274890	3.28949e-11	2.37523e-11	5.72602e-09	2.12634e-11	4.07347e-10	2.13159e-11	4.75046e-15	5.72316e-09	1.41349e-10	2.12634e-11	0.0037245	8.30042e-07	0.0246978	0.00371533		54.3333	54.3333		0.286303	4.12342e-05	0.761686	0.00122541
119	2022-03-21 12:07:17	3305597	3.47116e-11	2.88202e-11	5.71234e-09	4.37524e-12	3.99384e-10	2.24931e-11	5.76404e-15	5.70948e-09	1.38586e-10	4.37524e-12	0.00393961	1.00956e-06	0.024273	0.000766311		54.85	54.85		0.288282	4.17094e-05	0.774336	0.00238317
120	2022-03-21 12:07:45	3333055	2.95624e-11	3.83825e-11	5.63419e-09	1.19324e-12	3.81993e-10	1.91564e-11	7.6765e-15	5.63137e-09	1.32552e-10	1.19324e-12	0.00340173	1.36317e-06	0.0235381	0.000211891		55.3167	55.3167		0.289995	4.22631e-05	0.785492	0.00261142
121	2022-03-21 12:08:15	3363761	2.14462e-11	2.4817e-11	5.63203e-09	-7.71848e-12	3.73116e-10	1.38971e-11	4.9634e-15	5.62921e-09	1.29471e-10	-7.71848e-12	0.00246875	8.81722e-07	0.0229999	-0.00137115		55.8167	55.8167		0.291463	4.28243e-05	0.797127	0.0023216
122	2022-03-21 12:08:46	3394468	2.89174e-11	4.72282e-11	5.62831e-09	1.49102e-11	3.76057e-10	1.87385e-11	9.44564e-15	5.6255e-09	1.30492e-10	1.49102e-11	0.00333099	1.67908e-06	0.0231965	0.00265047		56.3333	56.3333		0.292961	4.34858e-05	0.809061	0.0026521
123	2022-03-21 12:09:17	3425175	3.39269e-11	2.92297e-11	5.61353e-09	5.04174e-12	3.56339e-10	2.19846e-11	5.84594e-15	5.61072e-09	1.2365e-10	5.04174e-12	0.00391832	1.04192e-06	0.0220381	0.00089859		56.85	56.85		0.294834	4.41888e-05	0.820747	0.00356894
124	2022-03-21 12:09:47	3455882	3.05622e-11	4.08191e-11	5.59825e-09	2.79499e-13	3.63886e-10	1.98043e-11	8.16382e-15	5.59545e-09	1.26268e-10	2.79499e-13	0.00353936	1.45901e-06	0.0225663	4.99511e-05		57.35	57.35		0.296698	4.4814e-05	0.831898	0.00380607
125	2022-03-21 12:10:18	3486590	3.79366e-11	3.65191e-11	5.57305e-09	1.33837e-11	3.47939e-10	2.45829e-11	7.30382e-15	5.57026e-09	1.20735e-10	1.33837e-11	0.00441324	1.31122e-06	0.0216749	0.00240271		57.8667	57.8667		0.298753	4.55296e-05	0.843327	0.00443967
126	2022-03-21 12:10:49	3517296	3.63886e-11	4.78323e-11	5.57312e-09	-4.88049e-12	3.53106e-10	2.35798e-11	9.56646e-15	5.57033e-09	1.22528e-10	-4.88049e-12	0.00423311	1.71739e-06	0.0219965	-0.000876158		58.3833	58.3833		0.300987	4.6312e-05	0.854608	0.00483403
127	2022-03-21 12:11:20	3548003	2.56709e-11	4.62761e-11	5.56092e-09	-1.26849e-12	3.55133e-10	1.66347e-11	9.25522e-15	5.55814e-09	1.23231e-10	-1.26849e-12	0.00299286	1.66517e-06	0.0221713	-0.000228222		58.9	58.9		0.302853	4.71859e-05	0.866018	0.00454873
128	2022-03-21 12:11:50	3578710	3.68509e-11	4.75866e-11	5.53728e-09	1.98229e-11	3.50672e-10	2.38794e-11	9.51732e-15	5.53451e-09	1.21683e-10	1.98229e-11	0.00431463	1.71963e-06	0.0219863	0.00358169		59.4	59.4		0.30468	4.80321e-05	0.877058	0.0053871
129	2022-03-21 12:12:21	3609417	2.15429e-11	4.94601e-11	5.52488e-09	-1.11154e-11	3.4026e-10	1.39598e-11	9.89202e-15	5.52212e-09	1.1807e-10	-1.11154e-11	0.00252798	1.79135e-06	0.0213813	-0.00201289		59.9167	59.9167		0.306448	4.89391e-05	0.888261	0.00579238
130	2022-03-21 12:12:48	3636874	3.36689e-11	3.65704e-11	5.52438e-09	6.08449e-12	3.36397e-10	2.18174e-11	7.31408e-15	5.52162e-09	1.1673e-10	6.08449e-12	0.00395128	1.32463e-06	0.0211405	0.00110194		60.3667	60.3667		0.307906	4.96402e-05	0.897828	0.00558741
131	2022-03-21 12:13:19	3667581	3.85064e-11	2.92194e-11	5.49153e-09	-1.34912e-11	3.41112e-10	2.49521e-11	5.84388e-15	5.48878e-09	1.18366e-10	-1.34912e-11	0.00454602	1.06469e-06	0.021565	-0.00245796		60.8833	60.8833		0.310101	5.02574e-05	0.908861	0.00523711
132	2022-03-21 12:13:50	3698288	2.02099e-11	3.54544e-11	5.52238e-09	1.00834e-11	3.26484e-10	1.3096e-11	7.09088e-15	5.51962e-09	1.1329e-10	1.00834e-11	0.00237263	1.28467e-06	0.020525	0.00182683		61.4	61.4		0.311888	5.08643e-05	0.919734	0.00507407
133	2022-03-21 12:14:20	3728995	3.08417e-11	3.95804e-11	5.53064e-09	-6.36399e-12	3.29679e-10	1.99854e-11	7.91608e-15	5.52787e-09	1.14399e-10	-6.36399e-12	0.00361539	1.43203e-06	0.0206949	-0.00115125		61.9	61.9		0.313385	5.15435e-05	0.930039	0.00524296
134	2022-03-21 12:14:51	3759702	2.53377e-11	4.92247e-11	5.16624e-09	3.20349e-12	3.30254e-10	1.64188e-11	9.84494e-15	5.16366e-09	1.14598e-10	3.20349e-12	0.00317969	1.90658e-06	0.0221932	0.000620392		62.4167	62.4167		0.31514	5.2406e-05	0.941118	0.00510582
135	2022-03-21 12:15:22	3790410	2.99064e-11	4.73409e-11	5.27649e-09	6.70798e-12	3.31714e-10	1.93793e-11	9.46818e-15	5.27385e-09	1.15105e-10	6.70798e-12	0.00367461	1.79531e-06	0.0218256	0.00127193		62.9333	62.9333		0.316911	5.33623e-05	0.95249	0.00559467
136	2022-03-21 12:15:53	3821116	2.39187e-11	4.0809e-11	5.50642e-09	2.24889e-11	3.2511e-10	1.54993e-11	8.1618e-15	5.50367e-09	1.12813e-10	2.24889e-11	0.00281618	1.48297e-06	0.0204978	0.00408617		63.45	63.45		0.318588	5.42092e-05	0.963423	0.00697885
137	2022-03-21 12:16:23	3851823	3.69369e-11	4.26518e-11	1.12157e-07	-2.23384e-11	3.70813e-10	2.39351e-11	8.53036e-15	1.12101e-07	1.28672e-10	-2.23384e-11	0.000213514	7.60954e-08	0.00114782	-0.00019927		63.95	63.95		0.319345	5.45989e-05	0.968835	0.00795057
138	2022-03-21 12:16:56	3884071	2.01669e-11	3.13182e-11	2.84426e-07	3.02074e-12	3.26991e-10	1.30682e-11	6.26364e-15	2.84284e-07	1.13466e-10	3.02074e-12	4.59687e-05	2.20331e-08	0.000399129	1.06258e-05		64.5	64.5		0.319417	5.46259e-05	0.96926	0.00789869
139	2022-03-21 12:17:24	3912178	3.34969e-11	2.56464e-11	3.49463e-07	3.93449e-12	2.94588e-10	2.1706e-11	5.12928e-15	3.49288e-07	1.02222e-10	3.93449e-12	6.21435e-05	1.46849e-08	0.000292658	1.12643e-05		64.9667	64.9667		0.319442	5.46345e-05	0.969422	0.0079038
140	2022-03-21 12:17:52	3940285	1.21367e-11	2.22269e-11	3.66395e-07	-3.59049e-12	2.72734e-10	7.86458e-12	4.44538e-15	3.66212e-07	9.46387e-11	-3.59049e-12	2.14755e-05	1.21388e-08	0.000258426	-9.80441e-06		65.4333	65.4333		0.319461	5.46408e-05	0.96955	0.00790414
141	2022-03-21 12:18:20	3968392	1.74246e-10	3.42258e-11	3.4382e-07	7.46263e-11	1.36644e-09	1.12911e-10	6.84516e-15	3.43648e-07	4.74155e-10	7.46263e-11	0.000328567	1.99191e-08	0.00137977	0.000217159		65.9	65.9		0.319543	5.46482e-05	0.969932	0.00795252
142	2022-03-21 12:18:53	4001830	8.12982e-09	3.59868e-11	3.29218e-07	1.04188e-10	1.80916e-09	5.26812e-09	7.19736e-15	3.29053e-07	6.27779e-10	1.04188e-10	0.0160099	2.18729e-08	0.00190783	0.000316629		66.45	66.45		0.324036	5.46597e-05	0.970837	0.00809932
143	2022-03-21 12:19:15	4023307	1.04205e-08	3.72768e-11	3.35309e-07	1.22227e-10	1.47563e-09	6.75248e-09	7.45536e-15	3.35141e-07	5.12044e-10	1.22227e-10	0.0201482	2.22454e-08	0.00152784	0.000364703		66.8167	66.8167		0.330665	5.46678e-05	0.971466	0.00822423
144	2022-03-21 12:19:38	4046335	1.15024e-08	4.57642e-11	3.33966e-07	1.16164e-10	1.1226e-09	7.45356e-09	9.15284e-15	3.33799e-07	3.89542e-10	1.16164e-10	0.0223295	2.74202e-08	0.001167	0.000348006		67.2	67.2		0.338807	5.46773e-05	0.971983	0.00836083
145	2022-03-21 12:19:57	4065711	1.19391e-08	4.27439e-11	3.3307e-07	1.17121e-10	9.1195e-10	7.73654e-09	8.54878e-15	3.32903e-07	3.16447e-10	1.17121e-10	0.0232396	2.56795e-08	0.000950566	0.000351817		67.5167	67.5167		0.346022	5.46857e-05	0.972318	0.00847163
146	2022-03-21 12:20:17	4085086	1.21481e-08	4.76787e-11	3.32712e-07	1.08918e-10	7.81629e-10	7.87197e-09	9.53574e-15	3.32546e-07	2.71225e-10	1.08918e-10	0.0236718	2.8675e-08	0.000815603	0.000327528		67.85	67.85		0.35384	5.46948e-05	0.972613	0.00858486
147	2022-03-21 12:20:36	4104463	1.17611e-08	3.67649e-11	3.76608e-07	8.15278e-11	6.24067e-10	7.62119e-09	7.35298e-15	3.7642e-07	2.16551e-10	8.15278e-11	0.0202465	1.9534e-08	0.000575292	0.000216587		68.1667	68.1667		0.360794	5.47024e-05	0.972833	0.00867101
148	2022-03-21 12:20:58	4126430	5.66305e-09	2.45509e-11	3.0933e-07	5.09656e-11	4.93101e-10	3.66966e-09	4.91018e-15	3.09175e-07	1.71106e-10	5.09656e-11	0.0118692	1.58815e-08	0.000553427	0.000164844		68.5333	68.5333		0.366682	5.47089e-05	0.97304	0.00874094
149	2022-03-21 12:21:19	4147906	2.75638e-09	3.01716e-11	3.13809e-07	2.47894e-11	4.29976e-10	1.78613e-09	6.03432e-15	3.13652e-07	1.49202e-10	2.47894e-11	0.00569464	1.92389e-08	0.000475692	7.90347e-05		68.8833	68.8833		0.369756	5.47151e-05	0.97322	0.00878362
150	2022-03-21 12:21:41	4169383	1.45526e-09	4.58461e-11	3.34324e-07	6.98748e-12	4.00152e-10	9.43008e-10	9.16922e-15	3.34157e-07	1.38853e-10	6.98748e-12	0.00282205	2.74399e-08	0.000415532	2.09108e-05		69.25	69.25		0.371317	5.47236e-05	0.973383	0.00880194
151	2022-03-21 12:22:09	4197360	6.80226e-10	2.02918e-11	3.52599e-07	2.48647e-11	3.59164e-10	4.40786e-10	4.05836e-15	3.52423e-07	1.2463e-10	2.48647e-11	0.00125073	1.15156e-08	0.000353638	7.05536e-05		69.7167	69.7167		0.372267	5.47327e-05	0.973563	0.00882328
152	2022-03-21 12:22:37	4225467	3.62371e-10	3.14718e-11	2.23689e-07	-1.49424e-12	5.90089e-10	2.34816e-10	6.29436e-15	2.23577e-07	2.04761e-10	-1.49424e-12	0.00105027	2.8153e-08	0.00091584	-6.68333e-06		70.1833	70.1833		0.372804	5.4742e-05	0.973859	0.00883819
153	2022-03-21 12:23:05	4253575	1.581e-10	3.39391e-11	7.22332e-08	-9.24498e-13	6.65892e-10	1.02449e-10	6.78782e-15	7.21971e-08	2.31065e-10	-9.24498e-13	0.00141902	9.40179e-08	0.00320047	-1.28052e-05		70.65	70.65		0.37338	5.47705e-05	0.974819	0.00883364
154	2022-03-21 12:23:34	4282702	6.34679e-11	3.09087e-11	2.60873e-08	4.80524e-12	6.38319e-10	4.11272e-11	6.18174e-15	2.60743e-08	2.21497e-10	4.80524e-12	0.00157731	2.37082e-07	0.00849484	0.000184291		71.1333	71.1333		0.374105	5.48505e-05	0.977646	0.00887508
155	2022-03-21 12:24:03	4311310	7.30138e-11	2.63937e-11	1.22796e-08	-1.58884e-11	5.90749e-10	4.73129e-11	5.27874e-15	1.22735e-08	2.0499e-10	-1.58884e-11	0.0038549	4.30094e-07	0.0167019	-0.00129453		71.6167	71.6167		0.375417	5.50117e-05	0.983735	0.00860677
156	2022-03-21 12:24:31	4339916	5.62761e-11	3.38061e-11	8.05801e-09	-1.58239e-11	5.53762e-10	3.64669e-11	6.76122e-15	8.05398e-09	1.92155e-10	-1.58239e-11	0.00452781	8.39488e-07	0.0238584	-0.00196473		72.0833	72.0833		0.377373	5.5308e-05	0.993199	0.00784628
157	2022-03-21 12:25:00	4368523	3.96029e-11	3.14207e-11	6.64963e-09	5.67599e-12	5.11061e-10	2.56627e-11	6.28414e-15	6.64631e-09	1.77338e-10	5.67599e-12	0.00386119	9.45509e-07	0.0266822	0.000854007		72.5667	72.5667		0.379401	5.57393e-05	1.00541	0.00757785
158	2022-03-21 12:25:32	4400250	3.74959e-11	3.28539e-11	6.2e-09	8.53548e-12	4.75134e-10	2.42973e-11	6.57078e-15	6.1969e-09	1.64871e-10	8.53548e-12	0.00392089	1.06033e-06	0.0266055	0.00137738		73.1	73.1		0.381476	5.62742e-05	1.01962	0.00817289
159	2022-03-21 12:26:02	4430957	5.44164e-11	4.11058e-11	6.01339e-09	1.62969e-11	4.49172e-10	3.52618e-11	8.22116e-15	6.01038e-09	1.55863e-10	1.62969e-11	0.00586682	1.36783e-06	0.0259322	0.00271146		73.6	73.6		0.383923	5.68813e-05	1.03276	0.0091951
160	2022-03-21 12:26:33	4461665	4.62786e-11	3.10726e-11	5.90279e-09	-3.88074e-12	4.32641e-10	2.99885e-11	6.21452e-15	5.89984e-09	1.50126e-10	-3.88074e-12	0.00508294	1.05334e-06	0.0254459	-0.000657771		74.1167	74.1167		0.386752	5.75067e-05	1.04603	0.00972563
161	2022-03-21 12:27:04	4492371	2.51119e-11	3.24751e-11	5.82734e-09	2.47894e-11	4.22328e-10	1.62725e-11	6.49502e-15	5.82443e-09	1.46548e-10	2.47894e-11	0.00279384	1.11513e-06	0.0251609	0.00425611		74.6333	74.6333		0.388786	5.80669e-05	1.0591	0.0106552
162	2022-03-21 12:27:35	4523078	4.43544e-11	4.61225e-11	5.77686e-09	1.51359e-11	4.15049e-10	2.87417e-11	9.2245e-15	5.77397e-09	1.44022e-10	1.51359e-11	0.0049778	1.5976e-06	0.0249433	0.0026214		75.15	75.15		0.390794	5.87677e-05	1.07205	0.0124319
163	2022-03-21 12:28:05	4553785	3.05299e-11	4.65423e-11	5.73832e-09	-1.75224e-12	4.00006e-10	1.97834e-11	9.30846e-15	5.73545e-09	1.38802e-10	-1.75224e-12	0.00344931	1.62297e-06	0.0242007	-0.00030551		75.65	75.65		0.392901	5.95729e-05	1.08433	0.0130109
164	2022-03-21 12:28:36	4584492	4.48704e-11	4.25085e-11	5.67902e-09	-3.12824e-12	3.79835e-10	2.9076e-11	8.5017e-15	5.67618e-09	1.31803e-10	-3.12824e-12	0.00512246	1.49779e-06	0.0232203	-0.000551117		76.1667	76.1667		0.395115	6.03791e-05	1.09658	0.0127896
165	2022-03-21 12:29:07	4615200	3.61091e-11	3.39596e-11	5.67138e-09	-2.06399e-12	3.66006e-10	2.33987e-11	6.79192e-15	5.66854e-09	1.27004e-10	-2.06399e-12	0.00412781	1.19818e-06	0.0224051	-0.000364113		76.6833	76.6833		0.397505	6.10755e-05	1.10837	0.0125531
166	2022-03-21 12:29:37	4645906	1.37277e-11	2.82878e-11	5.63361e-09	-1.64474e-11	3.60247e-10	8.89555e-12	5.65756e-15	5.63079e-09	1.25006e-10	-1.64474e-11	0.0015798	1.00475e-06	0.0222004	-0.00292097		77.1833	77.1833		0.398932	6.16262e-05	1.11952	0.0117319
167	2022-03-21 12:30:05	4673363	2.87992e-11	4.78834e-11	5.63649e-09	2.46712e-11	3.64148e-10	1.86619e-11	9.57668e-15	5.63367e-09	1.26359e-10	2.46712e-11	0.00331256	1.6999e-06	0.0224293	0.00437924		77.65	77.65		0.400073	6.22573e-05	1.12994	0.0120721
168	2022-03-21 12:30:36	4704070	2.73264e-11	3.57513e-11	5.62947e-09	-1.95649e-12	3.56354e-10	1.77075e-11	7.15026e-15	5.62666e-09	1.23655e-10	-1.95649e-12	0.00314708	1.27078e-06	0.0219766	-0.000347718		78.1667	78.1667		0.401742	6.30248e-05	1.14141	0.0131136
169	2022-03-21 12:31:06	4734777	2.84229e-11	3.87409e-11	5.59651e-09	-3.86999e-13	3.56876e-10	1.8418e-11	7.74818e-15	5.59371e-09	1.23836e-10	-3.86999e-13	0.00329263	1.38516e-06	0.0221384	-6.91847e-05		78.6667	78.6667		0.403352	6.36887e-05	1.15244	0.0130094
170	2022-03-21 12:31:37	4765485	2.54989e-11	2.87485e-11	5.60113e-09	3.10674e-12	3.32236e-10	1.65233e-11	5.7497e-15	5.59833e-09	1.15286e-10	3.10674e-12	0.00295147	1.02704e-06	0.0205929	0.000554941		79.1833	79.1833		0.404965	6.43119e-05	1.16347	0.0131349
171	2022-03-21 12:32:08	4796191	2.70362e-11	3.75532e-11	5.5779e-09	-1.21152e-11	3.37496e-10	1.75195e-11	7.51064e-15	5.57511e-09	1.17111e-10	-1.21152e-11	0.00314244	1.34717e-06	0.0210061	-0.00217309		79.7	79.7		0.406539	6.49252e-05	1.17422	0.0127168
172	2022-03-21 12:32:38	4826898	2.91324e-11	2.12951e-11	5.5646e-09	1.07284e-11	3.30616e-10	1.88778e-11	4.25902e-15	5.56182e-09	1.14724e-10	1.07284e-11	0.00339418	7.6576e-07	0.020627	0.00192894		80.2	80.2		0.408173	6.54535e-05	1.18463	0.0126558
173	2022-03-21 12:33:09	4857605	2.52732e-11	3.17891e-11	5.57666e-09	2.83799e-11	3.37726e-10	1.6377e-11	6.35782e-15	5.57387e-09	1.17191e-10	2.83799e-11	0.00293818	1.14065e-06	0.021025	0.0050916		80.7167	80.7167		0.409809	6.5946e-05	1.19539	0.0144694
174	2022-03-21 12:33:40	4888312	3.58296e-11	3.12158e-11	5.55192e-09	-1.72429e-11	3.36129e-10	2.32176e-11	6.24316e-15	5.54914e-09	1.16637e-10	-1.72429e-11	0.00418399	1.12507e-06	0.0210189	-0.00310731		81.2333	81.2333		0.411649	6.65313e-05	1.20625	0.0149821
175	2022-03-21 12:34:11	4919020	1.67914e-11	3.44204e-11	5.50963e-09	-1.88124e-11	3.21156e-10	1.08808e-11	6.88408e-15	5.50688e-09	1.11441e-10	-1.88124e-11	0.00197586	1.25009e-06	0.0202367	-0.00341617		81.75	81.75		0.41324	6.71448e-05	1.21691	0.0132968
176	2022-03-21 12:34:41	4949726	2.09302e-11	3.26799e-11	5.5278e-09	5.04174e-12	3.27897e-10	1.35628e-11	6.53598e-15	5.52504e-09	1.1378e-10	5.04174e-12	0.00245478	1.18298e-06	0.0205936	0.000912526		82.25	82.25		0.414348	6.77531e-05	1.22712	0.0126709
177	2022-03-21 12:35:12	4980433	3.34432e-11	4.07782e-11	5.52753e-09	-7.32073e-12	3.32374e-10	2.16712e-11	8.15564e-15	5.52477e-09	1.15334e-10	-7.32073e-12	0.00392255	1.4762e-06	0.0208758	-0.00132508		82.7667	82.7667		0.415996	6.84401e-05	1.23783	0.0125643
178	2022-03-21 12:35:43	5011140	2.07904e-11	5.1088e-11	5.33224e-09	-3.34324e-12	3.22776e-10	1.34722e-11	1.02176e-14	5.32957e-09	1.12003e-10	-3.34324e-12	0.00252782	1.91715e-06	0.0210154	-0.0006273		83.2833	83.2833		0.417662	6.93167e-05	1.24865	0.01206
179	2022-03-21 12:36:13	5041847	2.56494e-11	3.37958e-11	5.1502e-09	-7.85823e-12	3.31161e-10	1.66208e-11	6.75916e-15	5.14762e-09	1.14913e-10	-7.85823e-12	0.00322883	1.31306e-06	0.0223235	-0.00152657		83.7833	83.7833		0.419101	7.01242e-05	1.25949	0.0115215
180	2022-03-21 12:36:44	5072555	2.97129e-11	4.34913e-11	5.48387e-09	-7.96573e-12	3.17692e-10	1.9254e-11	8.69826e-15	5.48113e-09	1.10239e-10	-7.96573e-12	0.00351277	1.58695e-06	0.0201125	-0.0014533		84.3	84.3		0.420843	7.08734e-05	1.27045	0.0107517
181	2022-03-21 12:37:15	5103261	3.37334e-11	4.55696e-11	4.62775e-08	-4.09466e-11	3.73738e-10	2.18592e-11	9.11392e-15	4.62544e-08	1.29687e-10	-4.09466e-11	0.000472588	1.97039e-07	0.00280378	-0.000885248		84.8167	84.8167		0.421872	7.13343e-05	1.27637	0.0101476
182	2022-03-21 12:37:46	5134990	3.37549e-11	3.07961e-11	2.56298e-07	-1.86727e-11	3.12333e-10	2.18732e-11	6.15922e-15	2.5617e-07	1.0838e-10	-1.86727e-11	8.53854e-05	2.40435e-08	0.000423077	-7.28919e-05		85.3333	85.3333		0.422016	7.13914e-05	1.2772	0.00990006
183	2022-03-21 12:38:16	5164117	7.86898e-12	1.5009e-11	3.19812e-07	-1.18249e-11	2.96922e-10	5.0991e-12	3.0018e-15	3.19652e-07	1.03032e-10	-1.18249e-11	1.5952e-05	9.39083e-09	0.000322325	-3.6993e-05		85.8333	85.8333		0.422042	7.13997e-05	1.27739	0.00987259
184	2022-03-21 12:38:44	5192225	1.71892e-11	3.94166e-11	3.65409e-07	-9.25573e-12	2.88821e-10	1.11386e-11	7.88332e-15	3.65226e-07	1.00221e-10	-9.25573e-12	3.04978e-05	2.15848e-08	0.000274408	-2.53425e-05		86.3	86.3		0.422053	7.1407e-05	1.27753	0.00985804
185	2022-03-21 12:39:12	5220331	2.75414e-11	1.90428e-11	3.58422e-07	8.28823e-12	7.44886e-10	1.78468e-11	3.80856e-15	3.58243e-07	2.58475e-10	8.28823e-12	4.98177e-05	1.06312e-08	0.000721509	2.31358e-05		86.7667	86.7667		0.422071	7.14145e-05	1.27776	0.00985753
186	2022-03-21 12:39:42	5250519	6.50735e-09	3.89661e-11	3.20259e-07	7.22721e-11	1.82594e-09	4.21676e-09	7.79322e-15	3.20099e-07	6.33601e-10	7.22721e-11	0.0131733	2.43463e-08	0.00197939	0.000225781		87.2667	87.2667		0.425377	7.14232e-05	1.27843	0.00991976
187	2022-03-21 12:40:03	5271995	9.34707e-09	4.15461e-11	3.33697e-07	1.14455e-10	1.63409e-09	6.0569e-09	8.30922e-15	3.3353e-07	5.67029e-10	1.14455e-10	0.01816	2.4913e-08	0.00170008	0.000343162		87.6167	87.6167		0.43086	7.14318e-05	1.27908	0.0100193
188	2022-03-21 12:40:27	5295022	1.10786e-08	2.55747e-11	3.36384e-07	1.20593e-10	1.31701e-09	7.17893e-09	5.11494e-15	3.36216e-07	4.57002e-10	1.20593e-10	0.0213522	1.52133e-08	0.00135925	0.000358677		88.0167	88.0167		0.438763	7.14399e-05	1.27969	0.0101597
189	2022-03-21 12:40:43	5311148	1.15891e-08	4.49553e-11	3.32622e-07	1.14229e-10	1.04956e-09	7.50974e-09	8.99106e-15	3.32456e-07	3.64197e-10	1.14229e-10	0.0225887	2.70444e-08	0.00109548	0.000343592		88.2833	88.2833		0.444622	7.14455e-05	1.28002	0.0102533
190	2022-03-21 12:41:02	5330524	1.19264e-08	3.9181e-11	3.31458e-07	1.088e-10	8.51536e-10	7.72831e-09	7.8362e-15	3.31292e-07	2.95483e-10	1.088e-10	0.0233278	2.36534e-08	0.00089191	0.000328411		88.6	88.6		0.451892	7.14535e-05	1.28033	0.0103597
191	2022-03-21 12:41:21	5349900	1.21138e-08	3.50756e-11	3.31009e-07	1.06263e-10	7.13591e-10	7.84974e-09	7.01512e-15	3.30843e-07	2.47616e-10	1.06263e-10	0.0237265	2.12037e-08	0.000748439	0.000321188		88.9167	88.9167		0.459342	7.14606e-05	1.28059	0.0104626
192	2022-03-21 12:41:41	5369276	1.02648e-08	3.02842e-11	3.73562e-07	9.67928e-11	5.77212e-10	6.65159e-09	6.05684e-15	3.73375e-07	2.00293e-10	9.67928e-11	0.0178148	1.62219e-08	0.000536438	0.000259237		89.25	89.25		0.466266	7.14669e-05	1.28081	0.0105593
193	2022-03-21 12:41:59	5387992	4.96531e-09	2.88611e-11	3.08434e-07	4.81921e-11	4.73391e-10	3.21752e-09	5.77222e-15	3.0828e-07	1.64267e-10	4.81921e-11	0.010437	1.8724e-08	0.000532849	0.000156326		89.55	89.55		0.470503	7.14721e-05	1.28097	0.0106217
194	2022-03-21 12:42:21	5409470	2.44845e-09	3.38061e-11	3.14437e-07	2.32952e-11	4.25208e-10	1.5866e-09	6.76122e-15	3.1428e-07	1.47547e-10	2.32952e-11	0.00504835	2.15134e-08	0.000469477	7.41225e-05		89.9167	89.9167		0.473342	7.14795e-05	1.28115	0.0106639
195	2022-03-21 12:42:42	5430945	1.31674e-09	3.71232e-11	3.34951e-07	1.85759e-11	3.80142e-10	8.53248e-10	7.42464e-15	3.34784e-07	1.31909e-10	1.85759e-11	0.00254865	2.21774e-08	0.000394014	5.54863e-05		90.2667	90.2667		0.474672	7.14871e-05	1.2813	0.0106866
196	2022-03-21 12:43:11	5459963	6.03009e-10	2.3179e-11	3.52868e-07	6.95523e-12	3.33526e-10	3.9075e-10	4.6358e-15	3.52692e-07	1.15734e-10	6.95523e-12	0.00110791	1.31441e-08	0.000328144	1.97204e-05		90.75	90.75		0.475555	7.14957e-05	1.28148	0.0107048
197	2022-03-21 12:43:40	5488070	3.20134e-10	2.77861e-11	2.02547e-07	-1.56197e-11	6.04026e-10	2.07447e-10	5.55722e-15	2.02446e-07	2.09597e-10	-1.56197e-11	0.0010247	2.74504e-08	0.00103532	-7.7155e-05		91.2333	91.2333		0.476071	7.15055e-05	1.28181	0.0106909
198	2022-03-21 12:44:08	5516176	1.47457e-10	4.23958e-11	6.51169e-08	1.12337e-11	6.75651e-10	9.55521e-11	8.47916e-15	6.50843e-08	2.34451e-10	1.12337e-11	0.00146813	1.3028e-07	0.00360226	0.000172602		91.7	91.7		0.476652	7.15423e-05	1.28289	0.0107131
199	2022-03-21 12:44:37	5545305	7.43683e-11	3.92834e-11	2.39562e-08	5.97699e-12	6.23629e-10	4.81907e-11	7.85668e-15	2.39442e-08	2.16399e-10	5.97699e-12	0.00201262	3.28124e-07	0.00903764	0.000249621		92.1833	92.1833		0.477494	7.16531e-05	1.28594	0.0108152
200	2022-03-21 12:45:05	5573911	4.72246e-11	3.59766e-11	1.16407e-08	2.47249e-13	5.77197e-10	3.06015e-11	7.19532e-15	1.16349e-08	2.00287e-10	2.47249e-13	0.00263016	6.18427e-07	0.0172144	2.12507e-05		92.65	92.65		0.478577	7.18739e-05	1.29207	0.0108784
201	2022-03-21 12:45:34	5602518	5.36424e-11	2.32507e-11	7.8654e-09	2.96484e-11	5.34089e-10	3.47603e-11	4.65014e-15	7.86147e-09	1.85329e-10	2.96484e-11	0.0044216	5.9151e-07	0.0235743	0.00377136		93.1333	93.1333		0.480281	7.21663e-05	1.30193	0.0117949
202	2022-03-21 12:46:03	5631125	4.01081e-11	3.4451e-11	6.60314e-09	9.90073e-12	5.04581e-10	2.599e-11	6.8902e-15	6.59984e-09	1.7509e-10	9.90073e-12	0.00393798	1.044e-06	0.0265294	0.00150015		93.6167	93.6167		0.482301	7.25616e-05	1.31403	0.0130689
203	2022-03-21 12:46:34	5662852	4.76224e-11	4.34401e-11	6.16579e-09	1.23732e-11	4.71609e-10	3.08593e-11	8.68802e-15	6.16271e-09	1.63648e-10	1.23732e-11	0.00500743	1.40977e-06	0.0265546	0.00200775		94.1333	94.1333		0.484612	7.31955e-05	1.32775	0.0139751
204	2022-03-21 12:47:05	5693560	3.06697e-11	2.15613e-11	5.99053e-09	-1.39749e-12	4.32756e-10	1.9874e-11	4.31226e-15	5.98753e-09	1.50166e-10	-1.39749e-12	0.00331922	7.20206e-07	0.0250798	-0.0002334		94.65	94.65		0.486763	7.37457e-05	1.34109	0.0144335
205	2022-03-21 12:47:36	5724266	3.09707e-11	5.50091e-11	5.87644e-09	8.81498e-12	4.3251e-10	2.0069e-11	1.10018e-14	5.8735e-09	1.50081e-10	8.81498e-12	0.00341687	1.87313e-06	0.0255522	0.0015008		95.1667	95.1667		0.488503	7.44157e-05	1.35417	0.0147609
206	2022-03-21 12:48:06	5754973	3.19919e-11	4.11263e-11	5.82583e-09	1.91672e-11	4.12684e-10	2.07308e-11	8.22526e-15	5.82292e-09	1.43201e-10	1.91672e-11	0.0035602	1.41257e-06	0.0245927	0.00329168		95.6667	95.6667		0.490248	7.52371e-05	1.3667	0.015959
207	2022-03-21 12:48:37	5785680	3.30024e-11	3.98875e-11	5.76779e-09	-1.34374e-12	4.13659e-10	2.13856e-11	7.9775e-15	5.76491e-09	1.4354e-10	-1.34374e-12	0.00370961	1.3838e-06	0.0248989	-0.00023309		96.1833	96.1833		0.492126	7.59595e-05	1.37949	0.0167491
208	2022-03-21 12:49:08	5816387	4.09144e-11	4.36551e-11	5.73146e-09	-4.00974e-12	3.89771e-10	2.65125e-11	8.73102e-15	5.72859e-09	1.35251e-10	-4.00974e-12	0.0046281	1.52411e-06	0.0236097	-0.000699952		96.7	96.7		0.49428	7.67107e-05	1.39202	0.0165081
209	2022-03-21 12:49:39	5847095	3.16157e-11	3.57923e-11	5.69776e-09	-5.53624e-12	3.79167e-10	2.0487e-11	7.15846e-15	5.69491e-09	1.31571e-10	-5.53624e-12	0.00359742	1.25699e-06	0.0231032	-0.000972138		97.2167	97.2167		0.496405	7.74291e-05	1.40409	0.0160761
210	2022-03-21 12:50:09	5877801	2.83154e-11	4.26723e-11	5.69854e-09	2.02099e-11	3.74137e-10	1.83484e-11	8.53446e-15	5.69569e-09	1.29826e-10	2.02099e-11	0.00322145	1.49841e-06	0.0227936	0.00354828		97.7167	97.7167		0.498109	7.8118e-05	1.41556	0.0167202
211	2022-03-21 12:50:40	5908508	3.35614e-11	3.53623e-11	5.64927e-09	9.88998e-13	3.62412e-10	2.17478e-11	7.07246e-15	5.64645e-09	1.25757e-10	9.88998e-13	0.00385159	1.25255e-06	0.0222719	0.000175154		98.2333	98.2333		0.499937	7.88287e-05	1.4272	0.0176821
212	2022-03-21 12:51:11	5939215	2.53162e-11	3.50142e-11	5.65176e-09	7.76148e-12	3.60109e-10	1.64049e-11	7.00284e-15	5.64893e-09	1.24958e-10	7.76148e-12	0.00290407	1.23967e-06	0.0221206	0.00137397		98.75	98.75		0.501682	7.94725e-05	1.43867	0.0180823
213	2022-03-21 12:51:41	5969922	2.50904e-11	4.83544e-11	5.61753e-09	1.25237e-11	3.45451e-10	1.62586e-11	9.67088e-15	5.61472e-09	1.19871e-10	1.25237e-11	0.00289571	1.72241e-06	0.0213495	0.00223051		99.25	99.25		0.503132	8.0213e-05	1.44954	0.0189834
214	2022-03-21 12:52:12	6000630	2.84229e-11	2.91785e-11	5.61801e-09	2.00379e-11	3.44337e-10	1.8418e-11	5.8357e-15	5.6152e-09	1.19485e-10	2.00379e-11	0.00328003	1.03927e-06	0.0212788	0.00356851		99.7667	99.7667		0.504727	8.09264e-05	1.46055	0.0204815
215	2022-03-21 12:52:43	6031336	2.99064e-11	4.36449e-11	5.58823e-09	-9.69648e-12	3.40168e-10	1.93793e-11	8.72898e-15	5.58544e-09	1.18038e-10	-9.69648e-12	0.00346962	1.56281e-06	0.0211332	-0.00173603		100.283	100.283		0.506471	8.15986e-05	1.47151	0.0209549
216	2022-03-21 12:53:14	6062043	2.14462e-11	3.03764e-11	5.62132e-09	2.52624e-11	3.30446e-10	1.38971e-11	6.07528e-15	5.61851e-09	1.14665e-10	2.52624e-11	0.00247346	1.0813e-06	0.0204084	0.00449628		100.8	100.8		0.508006	8.22817e-05	1.48224	0.0216679
217	2022-03-21 12:53:44	6092750	1.97369e-11	3.24444e-11	5.57302e-09	-1.63399e-12	3.32359e-10	1.27895e-11	6.48888e-15	5.57023e-09	1.15329e-10	-1.63399e-12	0.00229605	1.16492e-06	0.0207044	-0.000293343		101.3	101.3		0.509198	8.28433e-05	1.49252	0.0227187
218	2022-03-21 12:54:12	6120206	1.91457e-11	2.90659e-11	5.55143e-09	-2.61762e-11	3.24634e-10	1.24064e-11	5.81318e-15	5.54865e-09	1.12648e-10	-2.61762e-11	0.00223593	1.04767e-06	0.0203019	-0.00471758		101.767	101.767		0.510256	8.33595e-05	1.50208	0.0215494
219	2022-03-21 12:54:42	6150915	1.84362e-11	3.0315e-11	5.5611e-09	2.53699e-12	3.22999e-10	1.19467e-11	6.063e-15	5.55832e-09	1.12081e-10	2.53699e-12	0.00214933	1.0908e-06	0.0201645	0.000456431		102.267	102.267		0.511352	8.38941e-05	1.5122	0.0204841
220	2022-03-21 12:55:13	6181621	2.61547e-11	3.11953e-11	5.54767e-09	-8.41723e-12	3.17761e-10	1.69482e-11	6.23906e-15	5.5449e-09	1.10263e-10	-8.41723e-12	0.00305655	1.12519e-06	0.0198855	-0.00151801		102.783	102.783		0.512697	8.44666e-05	1.52255	0.0202099
221	2022-03-21 12:55:44	6212328	3.57436e-11	4.4167e-11	5.5638e-09	1.39749e-13	3.24787e-10	2.31619e-11	8.8334e-15	5.56102e-09	1.12701e-10	1.39749e-13	0.00416504	1.58845e-06	0.0202663	2.51301e-05		103.3	103.3		0.514563	8.51676e-05	1.53292	0.0198242
222	2022-03-21 12:56:15	6243035	6.82623e-12	4.2703e-11	5.55214e-09	4.12906e-11	3.21562e-10	4.4234e-12	8.5406e-15	5.54936e-09	1.11582e-10	4.12906e-11	0.0007971	1.53902e-06	0.0201072	0.0074406		103.817	103.817		0.515845	8.59756e-05	1.54335	0.0217529
223	2022-03-21 12:56:45	6273742	1.52112e-11	3.39596e-11	5.29263e-09	1.94144e-11	3.14368e-10	9.85686e-12	6.79192e-15	5.28998e-09	1.09086e-10	1.94144e-11	0.00186331	1.28392e-06	0.0206212	0.00367003		104.317	104.317		0.51651	8.66813e-05	1.55353	0.0245306
224	2022-03-21 12:57:16	6304450	3.46256e-11	3.54442e-11	5.22219e-09	1.12767e-11	3.19881e-10	2.24374e-11	7.08884e-15	5.21958e-09	1.10999e-10	1.12767e-11	0.0042987	1.35812e-06	0.0212658	0.00216046		104.833	104.833		0.518101	8.73638e-05	1.56435	0.0260368
225	2022-03-21 12:57:47	6335156	2.72619e-11	3.12056e-11	5.51332e-09	1.43297e-11	3.09569e-10	1.76657e-11	6.24112e-15	5.51056e-09	1.0742e-10	1.43297e-11	0.00320579	1.13257e-06	0.0194936	0.00260041		105.35	105.35		0.52004	8.80073e-05	1.57488	0.0272667
226	2022-03-21 12:58:17	6365863	1.66839e-11	4.5969e-11	6.47154e-08	5.62224e-12	3.63219e-10	1.08112e-11	9.1938e-15	6.4683e-08	1.26037e-10	5.62224e-12	0.000167141	1.42136e-07	0.00194853	8.69198e-05		105.85	105.85		0.520883	8.83259e-05	1.58024	0.0279385
227	2022-03-21 12:58:49	6397590	2.58537e-11	3.42668e-11	2.67585e-07	1.55444e-11	3.17808e-10	1.67532e-11	6.85336e-15	2.67451e-07	1.10279e-10	1.55444e-11	6.26402e-05	2.56247e-08	0.000412335	5.81205e-05		106.383	106.383		0.520945	8.83707e-05	1.58087	0.0279772
228	2022-03-21 12:59:18	6426717	7.84748e-12	2.87588e-11	3.23395e-07	1.75439e-11	2.87823e-10	5.08517e-12	5.75176e-15	3.23233e-07	9.98746e-11	1.75439e-11	1.57322e-05	1.77945e-08	0.000308986	5.42763e-05		106.867	106.867		0.520964	8.83812e-05	1.58105	0.0280043
229	2022-03-21 12:59:46	6454825	3.74099e-12	1.48451e-11	3.64245e-07	3.27659e-11	2.81189e-10	2.42416e-12	2.96902e-15	3.64063e-07	9.75726e-11	3.27659e-11	6.65863e-06	8.15524e-09	0.00026801	9.00007e-05		107.333	107.333		0.520969	8.83872e-05	1.58118	0.028038
230	2022-03-21 13:00:14	6482931	2.67782e-11	3.33044e-11	3.54749e-07	5.14816e-11	9.29693e-10	1.73523e-11	6.66088e-15	3.54572e-07	3.22603e-10	5.14816e-11	4.89387e-05	1.87857e-08	0.00090984	0.000145194		107.8	107.8		0.520982	8.83935e-05	1.58146	0.0280929
231	2022-03-21 13:00:48	6516369	7.33679e-09	4.06656e-11	3.28322e-07	1.23291e-10	1.81526e-09	4.75424e-09	8.13312e-15	3.28158e-07	6.29895e-10	1.23291e-10	0.0144877	2.47842e-08	0.00191949	0.000375706		108.367	108.367		0.5251	8.84059e-05	1.58226	0.0282405
232	2022-03-21 13:01:09	6537845	9.75674e-09	3.87101e-11	3.33338e-07	1.17658e-10	1.53521e-09	6.32237e-09	7.74202e-15	3.33171e-07	5.32718e-10	1.17658e-10	0.0189763	2.32374e-08	0.00159893	0.000353146		108.717	108.717		0.530957	8.84143e-05	1.58287	0.028368
233	2022-03-21 13:01:32	6560871	1.11289e-08	4.49963e-11	3.34055e-07	1.2327e-10	1.16734e-09	7.21153e-09	8.99926e-15	3.33888e-07	4.05067e-10	1.2327e-10	0.0215986	2.69529e-08	0.00121318	0.000369196		109.1	109.1		0.538734	8.84239e-05	1.58341	0.0285065
234	2022-03-21 13:01:52	6580248	1.16335e-08	3.84747e-11	3.29038e-07	1.14756e-10	9.30564e-10	7.53851e-09	7.69494e-15	3.28873e-07	3.22906e-10	1.14756e-10	0.0229222	2.33979e-08	0.000981854	0.000348937		109.433	109.433		0.546154	8.84323e-05	1.58378	0.0286261
235	2022-03-21 13:02:11	6599624	1.18793e-08	2.64551e-11	3.29576e-07	9.72013e-11	7.77414e-10	7.69779e-09	5.29102e-15	3.29411e-07	2.69763e-10	9.72013e-11	0.0233683	1.60621e-08	0.000818924	0.000295076		109.75	109.75		0.553483	8.84385e-05	1.58406	0.0287281
236	2022-03-21 13:02:31	6619000	1.19257e-08	3.69901e-11	3.35668e-07	9.72228e-11	6.79153e-10	7.72785e-09	7.39802e-15	3.355e-07	2.35666e-10	9.72228e-11	0.0230338	2.20507e-08	0.000702432	0.000289785		110.083	110.083		0.561217	8.84449e-05	1.58432	0.0288256
237	2022-03-21 13:02:52	6640966	6.69787e-09	4.80677e-11	3.07987e-07	3.86676e-11	4.96826e-10	4.34022e-09	9.61354e-15	3.07833e-07	1.72399e-10	3.86676e-11	0.0140993	3.12297e-08	0.000560039	0.000125612		110.433	110.433		0.567715	8.84542e-05	1.58454	0.0288983
238	2022-03-21 13:03:14	6662444	3.05679e-09	2.95675e-11	3.08793e-07	-1.06209e-11	4.3509e-10	1.9808e-09	5.9135e-15	3.08639e-07	1.50976e-10	-1.06209e-11	0.00641786	1.91599e-08	0.000489168	-3.44121e-05		110.8	110.8		0.571476	8.84634e-05	1.58473	0.028915
239	2022-03-21 13:03:35	6683920	1.61322e-09	3.86896e-11	3.29934e-07	-5.37499e-12	3.91591e-10	1.04537e-09	7.73792e-15	3.29769e-07	1.35882e-10	-5.37499e-12	0.00317	2.34647e-08	0.000412052	-1.62993e-05		111.15	111.15		0.573154	8.84709e-05	1.58489	0.0289061
240	2022-03-21 13:03:57	6705396	9.10072e-10	2.94242e-11	3.47134e-07	2.15537e-11	3.59817e-10	5.89727e-10	5.88484e-15	3.4696e-07	1.24856e-10	2.15537e-11	0.00169969	1.69611e-08	0.000359858	6.21215e-05		111.517	111.517		0.574047	8.84783e-05	1.58503	0.0289145
241	2022-03-21 13:04:26	6734413	4.24484e-10	3.30485e-11	3.16855e-07	1.04489e-11	4.66157e-10	2.75066e-10	6.6097e-15	3.16697e-07	1.61756e-10	1.04489e-11	0.000868546	2.08708e-08	0.000510762	3.29934e-05		112	112		0.574668	8.84874e-05	1.58524	0.0289375
242	2022-03-21 13:04:54	6762520	1.92295e-10	2.97416e-11	1.14128e-07	1.70494e-11	6.42127e-10	1.24607e-10	5.94832e-15	1.14071e-07	2.22818e-10	1.70494e-11	0.00109237	5.21458e-08	0.00195333	0.000149463		112.467	112.467		0.575125	8.85045e-05	1.58581	0.0289801
243	2022-03-21 13:05:22	6790626	9.52018e-11	1.60635e-11	3.79368e-08	1.26527e-11	6.21694e-10	6.16908e-11	3.2127e-15	3.79178e-08	2.15728e-10	1.26527e-11	0.00162696	8.47279e-08	0.00568935	0.000333687		112.933	112.933		0.57576	8.85364e-05	1.5876	0.0290928
244	2022-03-21 13:05:51	6819755	6.91653e-11	3.71437e-11	1.58019e-08	5.05249e-12	5.8754e-10	4.48191e-11	7.42874e-15	1.5794e-08	2.03876e-10	5.05249e-12	0.00283773	4.70352e-07	0.0129085	0.000319899		113.417	113.417		0.576839	8.86706e-05	1.59209	0.0292508
245	2022-03-21 13:06:20	6848361	4.94391e-11	2.36602e-11	9.19e-09	-2.45744e-11	5.41016e-10	3.20365e-11	4.73204e-15	9.1854e-09	1.87733e-10	-2.45744e-11	0.00348777	5.15169e-07	0.0204381	-0.00267537		113.9	113.9		0.578367	8.89087e-05	1.60015	0.0286815
246	2022-03-21 13:06:48	6876968	4.66441e-11	3.49425e-11	6.98581e-09	3.56899e-11	5.08213e-10	3.02254e-11	6.9885e-15	6.98232e-09	1.7635e-10	3.56899e-11	0.00432885	1.00089e-06	0.0252566	0.00511147		114.367	114.367		0.580191	8.92625e-05	1.61081	0.02925
247	2022-03-21 13:07:20	6908695	3.96566e-11	3.98977e-11	6.35231e-09	4.80524e-12	4.71509e-10	2.56975e-11	7.97954e-15	6.34913e-09	1.63614e-10	4.80524e-12	0.0040474	1.25679e-06	0.0257694	0.000756834		114.9	114.9		0.582425	8.98645e-05	1.62442	0.0308148
248	2022-03-21 13:07:51	6939402	5.77059e-11	2.99054e-11	6.03596e-09	-1.69849e-12	4.4736e-10	3.73934e-11	5.98108e-15	6.03294e-09	1.55234e-10	-1.69849e-12	0.00619821	9.91404e-07	0.025731	-0.000281536		115.417	115.417		0.585072	9.04453e-05	1.63772	0.0309376
249	2022-03-21 13:08:22	6970110	3.27981e-11	4.4812e-11	5.90329e-09	-1.01372e-11	4.40396e-10	2.12532e-11	8.9624e-15	5.90034e-09	1.52817e-10	-1.01372e-11	0.00360203	1.51896e-06	0.0258998	-0.00171807		115.933	115.933		0.587604	9.10938e-05	1.65106	0.0304211
250	2022-03-21 13:08:52	7000816	4.15486e-11	2.5718e-11	5.84373e-09	-5.89099e-12	4.09597e-10	2.69235e-11	5.1436e-15	5.84081e-09	1.4213e-10	-5.89099e-12	0.00460955	8.80632e-07	0.024334	-0.00100859		116.433	116.433		0.589656	9.16937e-05	1.66362	0.0297394
251	2022-03-21 13:09:23	7031523	2.74339e-11	3.02023e-11	5.78944e-09	3.59049e-12	3.95937e-10	1.77772e-11	6.04046e-15	5.78655e-09	1.3739e-10	3.59049e-12	0.00307216	1.04388e-06	0.023743	0.000620489		116.95	116.95		0.591641	9.21909e-05	1.67604	0.0296391
252	2022-03-21 13:09:54	7062230	2.46067e-11	4.51601e-11	5.72444e-09	-1.39427e-11	3.85509e-10	1.59451e-11	9.03202e-15	5.72158e-09	1.33772e-10	-1.39427e-11	0.00278684	1.57859e-06	0.0233802	-0.00243686		117.467	117.467		0.593154	9.28684e-05	1.68821	0.0291699
253	2022-03-21 13:10:24	7092937	2.83154e-11	4.62863e-11	5.71466e-09	-4.94499e-12	3.80511e-10	1.83484e-11	9.25726e-15	5.7118e-09	1.32037e-10	-4.94499e-12	0.00321236	1.62072e-06	0.0231166	-0.000865749		117.967	117.967		0.594654	9.36682e-05	1.69984	0.0283442
254	2022-03-21 13:10:55	7123645	2.39079e-11	2.38751e-11	5.70682e-09	5.33199e-12	3.57997e-10	1.54923e-11	4.77502e-15	5.70397e-09	1.24225e-10	5.33199e-12	0.00271606	8.3714e-07	0.0217787	0.000934786		118.483	118.483		0.596186	9.43031e-05	1.71144	0.0283621
255	2022-03-21 13:11:26	7154351	2.09302e-11	3.49323e-11	5.66391e-09	3.89364e-11	3.56646e-10	1.35628e-11	6.98646e-15	5.66108e-09	1.23756e-10	3.89364e-11	0.00239579	1.23412e-06	0.0218609	0.00687791		119	119		0.597506	9.48382e-05	1.72271	0.0303804
256	2022-03-21 13:11:57	7185058	1.73074e-11	5.17125e-11	5.64515e-09	1.58024e-12	3.60999e-10	1.12152e-11	1.03425e-14	5.64233e-09	1.25267e-10	1.58024e-12	0.00198769	1.83302e-06	0.0222012	0.000280069		119.517	119.517		0.598639	9.56306e-05	1.73409	0.0322295
257	2022-03-21 13:12:27	7215765	3.14867e-11	4.01025e-11	5.61751e-09	-9.02998e-13	3.47915e-10	2.04034e-11	8.0205e-15	5.6147e-09	1.20727e-10	-9.02998e-13	0.00363392	1.42848e-06	0.0215019	-0.000160827		120.017	120.017		0.600044	9.64459e-05	1.74502	0.0322593
258	2022-03-21 13:12:58	7246472	1.88232e-11	3.70413e-11	5.61008e-09	-1.85437e-11	3.43799e-10	1.21974e-11	7.40826e-15	5.60727e-09	1.19298e-10	-1.85437e-11	0.00217529	1.32119e-06	0.0212756	-0.00330708		120.533	120.533		0.601545	9.71563e-05	1.75607	0.0313634
259	2022-03-21 13:13:29	7277180	2.38972e-11	3.21577e-11	5.59877e-09	5.88024e-12	3.31759e-10	1.54854e-11	6.43154e-15	5.59597e-09	1.1512e-10	5.88024e-12	0.00276724	1.14932e-06	0.020572	0.0010508		121.05	121.05		0.602822	9.77945e-05	1.76688	0.0307806
260	2022-03-21 13:13:59	7307886	9.69648e-12	3.14513e-11	5.62198e-09	2.44454e-11	3.24111e-10	6.28332e-12	6.29026e-15	5.61917e-09	1.12467e-10	2.44454e-11	0.00111819	1.11943e-06	0.0200148	0.00435036		121.55	121.55		0.603793	9.83617e-05	1.77703	0.0321309
261	2022-03-21 13:14:30	7338593	3.27551e-11	3.94677e-11	5.57765e-09	4.39674e-12	3.33595e-10	2.12253e-11	7.89354e-15	5.57486e-09	1.15757e-10	4.39674e-12	0.00380732	1.41592e-06	0.0207642	0.000788673		122.067	122.067		0.605065	9.90166e-05	1.78756	0.0334584
262	2022-03-21 13:15:01	7369300	1.50499e-11	3.94063e-11	5.58178e-09	4.89339e-11	3.29126e-10	9.75234e-12	7.88126e-15	5.57899e-09	1.14207e-10	4.89339e-11	0.00174805	1.41267e-06	0.0204709	0.00877111		122.583	122.583		0.606501	9.97473e-05	1.79821	0.0359281
263	2022-03-21 13:15:32	7400007	2.39079e-11	3.81266e-11	5.55513e-09	1.67484e-11	3.19082e-10	1.54923e-11	7.62532e-15	5.55235e-09	1.10721e-10	1.67484e-11	0.00279023	1.37335e-06	0.0199414	0.00301645		123.1	123.1		0.607673	0.000100467	1.80865	0.0389732
264	2022-03-21 13:15:59	7427465	2.73802e-11	3.39904e-11	5.53568e-09	3.64424e-12	3.17301e-10	1.77424e-11	6.79808e-15	5.53291e-09	1.10103e-10	3.64424e-12	0.0032067	1.22866e-06	0.0198997	0.000658648		123.55	123.55		0.609022	0.000101053	1.81762	0.0398001
265	2022-03-21 13:16:30	7458171	1.98014e-11	4.50577e-11	5.54059e-09	-1.46414e-11	3.1889e-10	1.28313e-11	9.01154e-15	5.53782e-09	1.10655e-10	-1.46414e-11	0.00231703	1.62727e-06	0.0199817	-0.00264389		124.067	124.067		0.610449	0.00010179	1.82792	0.0392872
266	2022-03-21 13:17:00	7488878	2.97344e-11	4.5631e-11	5.56003e-09	2.97667e-11	3.09837e-10	1.92679e-11	9.1262e-15	5.55725e-09	1.07513e-10	2.97667e-11	0.00346716	1.64222e-06	0.0193465	0.00535637		124.567	124.567		0.611895	0.000102608	1.83775	0.0399653
267	2022-03-21 13:17:31	7519585	3.86246e-11	4.78015e-11	6.40078e-09	-6.18124e-12	3.20234e-10	2.50287e-11	9.5603e-15	6.39758e-09	1.11121e-10	-6.18124e-12	0.00391222	1.49436e-06	0.0173693	-0.000966184		125.083	125.083		0.613802	0.000103418	1.84724	0.0410995
268	2022-03-21 13:18:02	7550292	2.82509e-11	3.93449e-11	5.12362e-09	8.29898e-12	3.15658e-10	1.83066e-11	7.86898e-15	5.12106e-09	1.09533e-10	8.29898e-12	0.00357477	1.53659e-06	0.0213888	0.00162056		125.6	125.6		0.615736	0.000104201	1.85725	0.0412685
269	2022-03-21 13:18:33	7581000	2.79392e-11	3.22909e-11	5.39551e-09	1.47489e-11	3.13869e-10	1.81046e-11	6.45818e-15	5.39281e-09	1.08913e-10	1.47489e-11	0.00335717	1.19755e-06	0.0201959	0.00273492		126.117	126.117		0.617526	0.000104907	1.86799	0.0423937
270	2022-03-21 13:19:03	7611706	2.76704e-11	2.5974e-11	5.96213e-09	-3.62596e-11	3.3136e-10	1.79304e-11	5.1948e-15	5.95915e-09	1.14982e-10	-3.62596e-11	0.00300889	8.71735e-07	0.019295	-0.00608469		126.617	126.617		0.619118	0.000105425	1.87787	0.0415562
271	2022-03-21 13:19:34	7642413	3.10137e-11	3.80856e-11	2.26824e-07	-1.07499e-12	3.19927e-10	2.00969e-11	7.61712e-15	2.26711e-07	1.11015e-10	-1.07499e-12	8.86455e-05	3.35984e-08	0.000489676	-4.74168e-06		127.133	127.133		0.619918	0.000105658	1.88298	0.0399831
272	2022-03-21 13:20:06	7674661	2.20697e-11	3.56694e-11	3.1587e-07	-2.98849e-12	2.98911e-10	1.43012e-11	7.13388e-15	3.15712e-07	1.03722e-10	-2.98849e-12	4.52981e-05	2.25962e-08	0.000328534	-9.46587e-06		127.667	127.667		0.619954	0.000105673	1.88319	0.0399793
273	2022-03-21 13:20:34	7702768	2.80467e-11	2.48478e-11	3.42208e-07	-2.34349e-12	2.67666e-10	1.81743e-11	4.96956e-15	3.42037e-07	9.28801e-11	-2.34349e-12	5.31354e-05	1.45293e-08	0.00027155	-6.85157e-06		128.133	128.133		0.619977	0.000105682	1.88333	0.0399755
274	2022-03-21 13:21:02	7730875	1.54584e-11	3.9867e-11	3.71501e-07	-8.06248e-13	2.97283e-10	1.0017e-11	7.9734e-15	3.71315e-07	1.03157e-10	-8.06248e-13	2.69772e-05	2.14734e-08	0.000277816	-2.17133e-06		128.6	128.6		0.619996	0.000105691	1.88346	0.0399734
275	2022-03-21 13:21:30	7758982	2.80747e-09	3.20451e-11	3.38534e-07	6.67896e-11	1.66158e-09	1.81924e-09	6.40902e-15	3.38365e-07	5.76568e-10	6.67896e-11	0.00537657	1.89412e-08	0.00170398	0.000197389		129.067	129.067		0.621256	0.0001057	1.88393	0.040019
276	2022-03-21 13:22:04	7792420	9.22447e-09	6.16536e-11	3.32532e-07	1.29096e-10	1.60331e-09	5.97746e-09	1.23307e-14	3.32366e-07	5.56349e-10	1.29096e-10	0.0179846	3.70999e-08	0.0016739	0.000388415		129.633	129.633		0.627875	0.000105716	1.88488	0.040185
277	2022-03-21 13:22:27	7815448	1.10167e-08	4.19966e-11	3.35041e-07	1.46941e-10	1.23059e-09	7.13882e-09	8.39932e-15	3.34873e-07	4.27015e-10	1.46941e-10	0.021318	2.50821e-08	0.00127515	0.000438796		130.017	130.017		0.635408	0.000105728	1.88545	0.0403435
278	2022-03-21 13:22:46	7834824	1.15521e-08	3.6683e-11	3.31458e-07	1.07532e-10	9.79329e-10	7.48576e-09	7.3366e-15	3.31292e-07	3.39827e-10	1.07532e-10	0.0225956	2.21454e-08	0.00102576	0.000324583		130.333	130.333		0.642361	0.000105735	1.88581	0.0404644
279	2022-03-21 13:23:06	7854200	1.18586e-08	3.3458e-11	3.29845e-07	1.19206e-10	8.10714e-10	7.68437e-09	6.6916e-15	3.2968e-07	2.81318e-10	1.19206e-10	0.0233086	2.02973e-08	0.000853305	0.000361581		130.667	130.667		0.650012	0.000105742	1.88613	0.0405787
280	2022-03-21 13:23:25	7873576	1.2042e-08	3.40723e-11	3.3092e-07	1.06973e-10	6.84904e-10	7.80322e-09	6.81446e-15	3.30755e-07	2.37662e-10	1.06973e-10	0.0235922	2.06028e-08	0.000718544	0.000323421		130.983	130.983		0.657438	0.000105749	1.88637	0.0406872
281	2022-03-21 13:23:44	7892951	9.83559e-09	3.1308e-11	3.16945e-07	6.47471e-11	5.26849e-10	6.37346e-09	6.2616e-15	3.16787e-07	1.82817e-10	6.47471e-11	0.0201191	1.9766e-08	0.000577097	0.000204387		131.3	131.3		0.664359	0.000105755	1.88658	0.0407708
282	2022-03-21 13:24:06	7914918	3.99783e-09	2.88611e-11	3.06912e-07	2.93474e-11	4.42869e-10	2.59059e-09	5.77222e-15	3.06759e-07	1.53676e-10	2.93474e-11	0.00844506	1.88168e-08	0.000500966	9.56694e-05		131.667	131.667		0.669596	0.000105762	1.88678	0.0408258
283	2022-03-21 13:24:28	7936395	2.02434e-09	3.29051e-11	3.21783e-07	6.50374e-11	4.0006e-10	1.31177e-09	6.58102e-15	3.21622e-07	1.38821e-10	6.50374e-11	0.00407861	2.0462e-08	0.000431627	0.000202217		132.033	132.033		0.671892	0.000105769	1.88695	0.0408804
284	2022-03-21 13:24:49	7957871	1.08457e-09	1.5828e-11	3.42297e-07	1.62324e-11	3.60262e-10	7.02801e-10	3.1656e-15	3.42126e-07	1.25011e-10	1.62324e-11	0.00205422	9.25274e-09	0.000365395	4.74457e-05		132.383	132.383		0.672965	0.000105775	1.88709	0.0409241
285	2022-03-21 13:25:18	7986888	5.26985e-10	2.56259e-11	3.53674e-07	6.98748e-13	3.75297e-10	3.41486e-10	5.12518e-15	3.53497e-07	1.30228e-10	6.98748e-13	0.000966023	1.44985e-08	0.000368399	1.97667e-06		132.867	132.867		0.673695	0.00010578	1.88726	0.040936
286	2022-03-21 13:25:46	8014994	2.52226e-10	3.65909e-11	1.53366e-07	4.07424e-12	6.23629e-10	1.63442e-10	7.31818e-15	1.53289e-07	2.16399e-10	4.07424e-12	0.00106624	4.7741e-08	0.0014117	2.65788e-05		133.333	133.333		0.674169	0.000105795	1.88768	0.0409427
287	2022-03-21 13:26:15	8043101	1.22291e-10	3.66932e-11	4.92993e-08	1.68989e-11	6.44185e-10	7.92446e-11	7.33864e-15	4.92747e-08	2.23532e-10	1.68989e-11	0.00160822	1.48933e-07	0.00453645	0.000342953		133.817	133.817		0.674815	0.000105842	1.88912	0.041032
288	2022-03-21 13:26:44	8072230	8.07323e-11	3.13899e-11	1.92458e-08	1.14917e-11	5.9872e-10	5.23145e-11	6.27798e-15	1.92362e-08	2.07756e-10	1.14917e-11	0.00271959	3.26363e-07	0.0108003	0.0005974		134.3	134.3		0.675861	0.000105957	1.89282	0.0412592
289	2022-03-21 13:27:12	8100836	6.06191e-11	2.98747e-11	1.01682e-08	4.93424e-12	5.54606e-10	3.92812e-11	5.97494e-15	1.01631e-08	1.92448e-10	4.93424e-12	0.00386507	5.87904e-07	0.018936	0.000485505		134.767	134.767		0.677398	0.000106171	1.89976	0.0415119
290	2022-03-21 13:27:41	8129443	4.68591e-11	3.0315e-11	7.30001e-09	5.35349e-12	5.11729e-10	3.03647e-11	6.063e-15	7.29636e-09	1.7757e-10	5.35349e-12	0.00416162	8.30962e-07	0.0243368	0.000733721		135.25	135.25		0.679338	0.000106514	1.91022	0.0418066
291	2022-03-21 13:28:09	8157920	4.94069e-11	2.91888e-11	6.4769e-09	2.10807e-11	4.90299e-10	3.20157e-11	5.83776e-15	6.47366e-09	1.70134e-10	2.10807e-11	0.00494553	9.01771e-07	0.0262809	0.00325638		135.717	135.717		0.681463	0.000106918	1.92203	0.0427376
292	2022-03-21 13:28:40	8188627	3.94954e-11	4.48428e-11	6.12249e-09	1.36417e-11	4.48213e-10	2.5593e-11	8.96856e-15	6.11943e-09	1.5553e-10	1.36417e-11	0.00418226	1.46559e-06	0.0254158	0.00222924		136.233	136.233		0.683821	0.000107529	1.93539	0.0441547
293	2022-03-21 13:29:11	8219335	3.90009e-11	3.34682e-11	5.98907e-09	7.70773e-12	4.26482e-10	2.52726e-11	6.69364e-15	5.98608e-09	1.47989e-10	7.70773e-12	0.0042219	1.1182e-06	0.0247222	0.00128761		136.75	136.75		0.685992	0.000108197	1.94834	0.0450632
294	2022-03-21 13:29:42	8250041	4.55369e-11	3.86077e-11	5.90372e-09	6.66498e-12	4.12791e-10	2.95079e-11	7.72154e-15	5.90077e-09	1.43238e-10	6.66498e-12	0.00500069	1.30857e-06	0.0242745	0.00112951		137.267	137.267		0.688374	0.000108824	1.961	0.0456876
295	2022-03-21 13:30:12	8280748	4.57949e-11	4.6102e-11	5.83013e-09	8.29898e-12	4.02256e-10	2.96751e-11	9.2204e-15	5.82721e-09	1.39583e-10	8.29898e-12	0.0050925	1.5823e-06	0.0239536	0.00142418		137.767	137.767		0.690897	0.000109546	1.97305	0.0463261
296	2022-03-21 13:30:43	8311455	3.21962e-11	4.17713e-11	5.76954e-09	-1.78557e-11	3.87491e-10	2.08631e-11	8.35426e-15	5.76666e-09	1.34459e-10	-1.78557e-11	0.00361789	1.44872e-06	0.0233167	-0.00309637		138.283	138.283		0.693148	0.00011033	1.98526	0.0458941
297	2022-03-21 13:31:14	8342162	2.60472e-11	3.16561e-11	5.72839e-09	-1.24592e-11	3.75704e-10	1.68786e-11	6.33122e-15	5.72553e-09	1.30369e-10	-1.24592e-11	0.00294795	1.10579e-06	0.0227698	-0.00217608		138.8	138.8		0.694844	0.000110989	1.99717	0.044532
298	2022-03-21 13:31:43	8371830	4.64291e-11	4.14642e-11	5.69943e-09	-8.41723e-12	3.62865e-10	3.00861e-11	8.29284e-15	5.69658e-09	1.25914e-10	-8.41723e-12	0.00528142	1.45576e-06	0.0221035	-0.00147759		139.283	139.283		0.696833	0.000111608	2.00801	0.0436491
299	2022-03-21 13:32:14	8402536	2.19407e-11	3.38982e-11	5.66532e-09	6.29949e-12	3.64263e-10	1.42176e-11	6.77964e-15	5.66249e-09	1.26399e-10	6.29949e-12	0.00251084	1.19729e-06	0.0223222	0.0011125		139.8	139.8		0.698846	0.000112294	2.01949	0.0435547
300	2022-03-21 13:32:45	8433243	2.28867e-11	3.82085e-11	5.646e-09	1.56197e-11	3.44268e-10	1.48306e-11	7.6417e-15	5.64318e-09	1.19461e-10	1.56197e-11	0.00262806	1.35415e-06	0.0211691	0.00276789		140.317	140.317		0.700173	0.000112953	2.03073	0.0445572
301	2022-03-21 13:33:15	8463950	2.05432e-11	6.16536e-11	5.64029e-09	5.46099e-12	3.45796e-10	1.3312e-11	1.23307e-14	5.63747e-09	1.19991e-10	5.46099e-12	0.00236134	2.18728e-06	0.0212846	0.000968695		140.817	140.817		0.70142	0.000113838	2.04134	0.0454913
302	2022-03-21 13:33:46	8494657	3.52599e-12	3.50551e-11	5.64594e-09	9.22348e-12	3.36704e-10	2.28484e-12	7.01102e-15	5.64312e-09	1.16836e-10	9.22348e-12	0.00040489	1.2424e-06	0.0207042	0.00163447		141.333	141.333		0.702135	0.000114724	2.05219	0.0461638
303	2022-03-21 13:34:17	8525365	2.28437e-11	3.42258e-11	5.62898e-09	2.23384e-11	3.33902e-10	1.48027e-11	6.84516e-15	5.62617e-09	1.15864e-10	2.23384e-11	0.00263105	1.21667e-06	0.0205938	0.00397045		141.85	141.85		0.702919	0.00011536	2.06286	0.0476117
304	2022-03-21 13:34:48	8556071	2.36822e-11	4.42796e-11	5.57857e-09	-2.67782e-11	3.32643e-10	1.53461e-11	8.85592e-15	5.57578e-09	1.15427e-10	-2.67782e-11	0.00275227	1.58828e-06	0.0207015	-0.00480259		142.367	142.367		0.70431	0.000116084	2.07352	0.0473968
305	2022-03-21 13:35:18	8586778	2.94442e-11	9.25522e-12	5.59536e-09	2.27577e-11	2.97881e-10	1.90798e-11	1.85104e-15	5.59256e-09	1.03365e-10	2.27577e-11	0.00341165	3.30983e-07	0.0184825	0.00406928		142.867	142.867		0.705851	0.000116564	2.08332	0.0472134
306	2022-03-21 13:35:49	8617485	3.95384e-11	2.99566e-11	5.58432e-09	1.94144e-11	3.20364e-10	2.56209e-11	5.99132e-15	5.58153e-09	1.11166e-10	1.94144e-11	0.0045903	1.07342e-06	0.0199168	0.00347833		143.383	143.383		0.707918	0.000116927	2.09324	0.0491632
307	2022-03-21 13:36:20	8648192	1.59637e-11	4.42387e-11	5.55497e-09	-6.22424e-12	3.20495e-10	1.03445e-11	8.84774e-15	5.55219e-09	1.11212e-10	-6.22424e-12	0.00186313	1.59356e-06	0.0200302	-0.00112104		143.9	143.9		0.709585	0.000117616	2.10356	0.0497722
308	2022-03-21 13:36:50	8678900	4.33654e-11	3.77785e-11	5.53792e-09	4.71924e-12	3.20679e-10	2.81008e-11	7.5557e-15	5.53515e-09	1.11276e-10	4.71924e-12	0.00507679	1.36504e-06	0.0201034	0.000852595		144.4	144.4		0.71132	0.000118355	2.11359	0.0497051
309	2022-03-21 13:37:21	8709606	3.45181e-11	2.64756e-11	5.54202e-09	-1.33729e-11	3.15296e-10	2.23677e-11	5.29512e-15	5.53925e-09	1.09408e-10	-1.33729e-11	0.00403804	9.55927e-07	0.0197514	-0.00241421		144.917	144.917		0.713675	0.000118955	2.12389	0.0493017
310	2022-03-21 13:37:52	8740313	1.99304e-11	4.0338e-11	5.55672e-09	3.52491e-11	3.14214e-10	1.29149e-11	8.0676e-15	5.55394e-09	1.09032e-10	3.52491e-11	0.00232536	1.45259e-06	0.0196315	0.00634668		145.433	145.433		0.715319	0.000119577	2.13406	0.0503176
311	2022-03-21 13:38:23	8771020	1.56089e-11	4.15358e-11	5.52441e-09	-3.01967e-11	3.09116e-10	1.01146e-11	8.30716e-15	5.52165e-09	1.07263e-10	-3.01967e-11	0.0018318	1.50447e-06	0.0194259	-0.00546878		145.95	145.95		0.716393	0.000120341	2.14415	0.0505444
312	2022-03-21 13:38:52	8800687	2.89282e-11	4.12696e-11	5.19336e-09	-6.35324e-12	3.11304e-10	1.87455e-11	8.25392e-15	5.19076e-09	1.08022e-10	-6.35324e-12	0.00361131	1.59012e-06	0.0208105	-0.00122395		146.433	146.433		0.717708	0.000121089	2.15388	0.048927
313	2022-03-21 13:39:23	8831395	2.41659e-11	3.86999e-11	5.31142e-09	9.72873e-12	3.07756e-10	1.56595e-11	7.73998e-15	5.30876e-09	1.06791e-10	9.72873e-12	0.00294975	1.45796e-06	0.020116	0.00183258		146.95	146.95		0.719403	0.000121876	2.16445	0.0490842
314	2022-03-21 13:39:54	8862101	3.18844e-11	5.17125e-11	5.55153e-09	2.34242e-11	3.10904e-10	2.06611e-11	1.03425e-14	5.54875e-09	1.07884e-10	2.34242e-11	0.00372355	1.86393e-06	0.0194429	0.00422152		147.467	147.467		0.721127	0.000122735	2.17467	0.0506482
315	2022-03-21 13:40:24	8892808	3.40989e-11	2.75507e-11	1.12874e-07	1.27924e-12	3.32681e-10	2.20961e-11	5.51014e-15	1.12818e-07	1.1544e-10	1.27924e-12	0.000195857	4.88412e-08	0.00102325	1.1339e-05		147.967	147.967		0.722107	0.000123213	2.17978	0.0517064
316	2022-03-21 13:40:56	8924016	1.49317e-11	2.50526e-11	2.78962e-07	-2.01239e-11	2.98481e-10	9.67574e-12	5.01052e-15	2.78823e-07	1.03573e-10	-2.01239e-11	3.47022e-05	1.79703e-08	0.000371465	-7.21746e-05		148.5	148.5		0.722168	0.000123231	2.18016	0.0516902
317	2022-03-21 13:41:24	8952123	2.82617e-11	2.54826e-11	3.46866e-07	-8.75048e-12	2.86556e-10	1.83136e-11	5.09652e-15	3.46693e-07	9.94349e-11	-8.75048e-12	5.28237e-05	1.47004e-08	0.00028681	-2.52399e-05		148.967	148.967		0.722189	0.000123238	2.18031	0.0516674
318	2022-03-21 13:41:52	8980230	1.69419e-11	2.95164e-11	3.51883e-07	-2.65524e-12	2.61386e-10	1.09784e-11	5.90328e-15	3.51707e-07	9.07009e-11	-2.65524e-12	3.12145e-05	1.67847e-08	0.000257888	-7.54958e-06		149.433	149.433		0.722208	0.000123246	2.18044	0.0516598
319	2022-03-21 13:42:20	9008337	1.11466e-10	3.64168e-11	3.60662e-07	3.88826e-11	1.23164e-09	7.223e-11	7.28336e-15	3.60482e-07	4.27379e-10	3.88826e-11	0.000200371	2.02045e-08	0.00118558	0.000107863		149.9	149.9		0.722262	0.000123254	2.18077	0.0516832
320	2022-03-21 13:42:53	9041775	7.46891e-09	3.16663e-11	3.29666e-07	1.45393e-10	1.73495e-09	4.83985e-09	6.33326e-15	3.29501e-07	6.02028e-10	1.45393e-10	0.0146884	1.92208e-08	0.00182709	0.000441252		150.45	150.45		0.726357	0.000123265	2.1816	0.0518342
[truncated: 591 more rows]

## Sheet: Integration Analysis
					Et (ć) integral		CO (ć) integral		CO2 (ć) integral		EtO (ć) integral
[truncated: 21 more rows]
