# Supplementary material for: Mechano-synthesis of a AgSrFeO3 catalyst for epoxidation of ethylene in a chemical looping set-up
Source: Royal Society of Chemistry journal article supplement (doi:10.1039/d4ma00485j), 2024-01-01
Supplement: d4ma00485j6.xlsx [file d4ma00485j6.xlsx]

## Sheet: Sheet1
Real time	ms	Ethylene mbar	Carbon monoxide mbar	Argon mbar	Ethylene oxide mbar	Carbon dioxide mbar
2022-03-31 11:37:28	14288	1.00447e-10	9.81524e-11	5.96178e-09	-8.33123e-12	5.03974e-10
2022-03-31 11:38:26	72696	5.96194e-11	7.30179e-11	6.52103e-09	8.50323e-12	4.90352e-10
2022-03-31 11:38:53	99741	6.16189e-11	6.5841e-11	6.73541e-09	2.81649e-12	4.76055e-10
2022-03-31 11:39:07	113784	5.06431e-11	6.38855e-11	9.41967e-09	2.23599e-12	5.26641e-10
2022-03-31 11:39:21	127827	5.53624e-11	6.31484e-11	9.41967e-09	-6.39624e-12	4.95029e-10
2022-03-31 11:39:35	141871	4.50854e-11	3.98977e-11	9.41967e-09	1.52757e-11	4.84371e-10
2022-03-31 11:39:49	155914	3.25079e-11	4.7003e-11	9.41967e-09	1.16744e-11	4.42876e-10
2022-03-31 11:40:03	169957	4.37094e-11	4.18123e-11	9.41967e-09	1.81459e-11	4.35643e-10
2022-03-31 11:40:18	184000	2.99709e-11	4.17201e-11	9.41967e-09	1.64582e-11	4.14043e-10
2022-03-31 11:40:32	198044	2.10054e-11	3.6601e-11	9.41967e-09	3.29487e-11	4.08844e-10
2022-03-31 11:40:46	212087	2.00057e-11	3.04685e-11	9.41967e-09	2.72297e-11	4.03055e-10
2022-03-31 11:41:00	226130	2.91002e-11	4.13413e-11	9.41967e-09	2.74124e-11	9.99386e-10
2022-03-31 11:41:17	243425	8.64093e-09	6.26672e-11	9.41967e-09	1.67463e-10	5.07589e-09
2022-03-31 11:41:30	256298	1.13036e-08	6.80831e-11	9.41967e-09	1.98788e-10	6.03155e-09
2022-03-31 11:41:39	265922	1.13036e-08	6.93117e-11	9.41967e-09	2.13999e-10	6.74033e-09
2022-03-31 11:41:49	275545	1.13036e-08	6.35374e-11	9.41967e-09	2.52613e-10	6.89534e-09
2022-03-31 11:41:59	285168	1.13036e-08	5.62377e-11	9.41967e-09	2.50764e-10	6.68219e-09
2022-03-31 11:42:08	294791	1.13036e-08	6.63734e-11	9.41967e-09	2.26942e-10	6.27649e-09
2022-03-31 11:42:18	304414	1.13036e-08	5.91249e-11	9.41967e-09	2.45121e-10	5.66524e-09
2022-03-31 11:42:28	314038	1.13036e-08	7.14515e-11	9.41967e-09	2.41734e-10	5.07274e-09
2022-03-31 11:42:37	323661	1.13036e-08	6.00053e-11	9.41967e-09	2.26383e-10	4.51446e-09
2022-03-31 11:42:47	333284	1.13036e-08	6.36604e-11	9.41967e-09	2.19084e-10	4.03045e-09
2022-03-31 11:42:56	342907	1.13036e-08	6.00668e-11	9.41967e-09	2.09646e-10	3.60065e-09
2022-03-31 11:43:06	352530	1.13036e-08	9.27262e-11	9.41967e-09	2.12376e-10	3.24313e-09
2022-03-31 11:43:16	362153	1.13036e-08	4.88049e-11	9.41967e-09	1.99928e-10	2.89686e-09
2022-03-31 11:43:25	371777	1.13036e-08	5.48863e-11	9.41967e-09	1.95176e-10	2.54745e-09
2022-03-31 11:43:35	381400	1.12549e-08	4.49144e-11	9.41967e-09	1.29548e-10	1.86846e-09
2022-03-31 11:43:45	391023	7.35645e-09	4.88868e-11	9.41967e-09	9.9448e-11	1.60102e-09
2022-03-31 11:43:54	400647	5.53883e-09	4.22525e-11	9.41967e-09	8.30973e-11	1.42004e-09
2022-03-31 11:44:04	410270	4.25227e-09	5.42209e-11	9.41967e-09	6.05439e-11	1.28591e-09
2022-03-31 11:44:13	419893	3.27973e-09	4.55594e-11	9.41967e-09	5.78994e-11	1.15964e-09
2022-03-31 11:44:23	429516	2.57734e-09	3.42463e-11	9.41967e-09	5.17504e-11	1.07948e-09
2022-03-31 11:44:33	439139	2.04357e-09	3.34887e-11	9.41967e-09	3.44321e-11	9.86114e-10
2022-03-31 11:44:42	448762	1.62576e-09	3.56285e-11	9.41967e-09	3.02719e-11	9.28829e-10
2022-03-31 11:44:52	458385	1.31006e-09	3.93551e-11	9.41967e-09	2.83477e-11	8.54136e-10
2022-03-31 11:45:02	468008	1.03754e-09	2.41926e-11	9.41967e-09	2.96592e-11	8.19286e-10
2022-03-31 11:45:12	478672	7.69817e-10	3.00999e-11	9.41967e-09	1.75224e-11	7.41871e-10
2022-03-31 11:45:24	490505	5.82885e-10	3.38266e-11	9.41967e-09	4.45049e-12	7.25643e-10
2022-03-31 11:45:36	502339	4.48424e-10	3.3591e-11	9.41967e-09	5.09549e-12	8.11643e-10
2022-03-31 11:45:48	514172	3.09986e-10	1.99232e-11	9.41967e-09	2.79499e-13	9.54164e-10
2022-03-31 11:46:00	526005	2.12967e-10	2.23497e-11	9.41967e-09	-5.49324e-12	1.03293e-09
2022-03-31 11:46:11	537839	1.51779e-10	3.60994e-11	9.41967e-09	-1.12229e-11	1.05128e-09
2022-03-31 11:46:23	549672	1.1424e-10	2.53085e-11	9.41967e-09	-1.29429e-11	1.05852e-09
2022-03-31 11:46:35	561505	8.09688e-11	3.07551e-11	9.41967e-09	-1.91564e-11	1.04119e-09
2022-03-31 11:46:47	573339	5.87701e-11	2.86359e-11	9.41967e-09	-1.68667e-11	1.00721e-09
2022-03-31 11:46:59	585172	5.12559e-11	1.46711e-11	9.41967e-09	-2.22524e-11	9.63764e-10
2022-03-31 11:47:11	597005	3.84204e-11	1.55926e-11	9.41967e-09	-2.46067e-11	9.39921e-10
2022-03-31 11:47:22	608839	4.01941e-11	1.93192e-11	9.41967e-09	-2.29834e-11	9.027e-10
2022-03-31 11:47:34	620672	1.83287e-11	3.28949e-11	9.41967e-09	-2.68857e-11	8.62814e-10
2022-03-31 11:47:46	632505	1.77697e-11	1.14973e-11	9.41967e-09	-3.61414e-11	8.35064e-10
2022-03-31 11:47:58	644339	2.49399e-11	1.69132e-11	9.41967e-09	-2.47464e-11	8.02036e-10
2022-03-31 11:48:10	656172	1.77374e-11	6.24522e-12	9.12658e-09	-2.66277e-11	7.77221e-10
2022-03-31 11:48:22	668005	2.05217e-11	2.1807e-11	8.56242e-09	-2.90142e-11	7.64229e-10
2022-03-31 11:48:33	679839	1.14272e-11	1.62478e-11	8.18117e-09	-3.70766e-11	7.41793e-10
2022-03-31 11:48:45	691672	6.96598e-12	1.0279e-11	7.90745e-09	-3.90546e-11	6.87591e-10
2022-03-31 11:48:57	703505	-7.19173e-12	5.14975e-12	7.68913e-09	-3.68294e-11	6.75183e-10
2022-03-31 11:49:09	715339	-1.34159e-11	1.02585e-11	7.54657e-09	-3.88181e-11	6.63988e-10
2022-03-31 11:49:21	727172	1.02124e-12	7.09498e-12	7.41713e-09	-4.06026e-11	6.52224e-10
2022-03-31 11:49:33	739005	1.47274e-12	1.22856e-11	7.33947e-09	-4.32364e-11	6.31607e-10
2022-03-31 11:49:48	754089	-5.90174e-12	1.50909e-11	7.22958e-09	-3.68616e-11	6.12626e-10
2022-03-31 11:50:02	768133	-6.26724e-12	5.52856e-13	7.13166e-09	-4.33224e-11	5.95902e-10
2022-03-31 11:50:16	782176	3.00999e-13	8.34403e-12	7.08513e-09	-4.43974e-11	5.79785e-10
2022-03-31 11:50:30	796219	5.64374e-12	-4.19761e-13	7.08277e-09	-3.84096e-11	5.60511e-10
2022-03-31 11:50:44	810263	-8.09473e-12	1.26337e-11	7.01172e-09	-4.58486e-11	5.50314e-10
2022-03-31 11:50:58	824306	-1.27064e-11	-3.99285e-13	6.94359e-09	-4.23119e-11	5.46084e-10
2022-03-31 11:51:12	838349	-9.26648e-12	-3.83928e-12	6.94598e-09	-3.46686e-11	5.29774e-10
2022-03-31 11:51:26	852393	-2.46174e-11	-1.03507e-11	6.86784e-09	-5.30726e-11	5.19976e-10
2022-03-31 11:51:40	866436	-4.00974e-12	-5.68213e-12	6.84184e-09	-4.98154e-11	5.17335e-10
2022-03-31 11:51:54	880479	-1.57487e-11	3.07142e-13	6.8342e-09	-4.25699e-11	5.13811e-10
2022-03-31 11:52:08	894523	-1.34697e-11	-8.31331e-12	6.77188e-09	-5.39971e-11	5.00834e-10
2022-03-31 11:52:22	908566	-2.19622e-11	1.95547e-12	6.72308e-09	-4.38169e-11	4.85884e-10
2022-03-31 11:52:36	922609	-2.15644e-11	8.7945e-12	6.70339e-09	-5.29544e-11	4.84271e-10
2022-03-31 11:52:50	936653	-2.25642e-11	-1.09342e-11	6.70123e-09	-4.84609e-11	4.72093e-10
2022-03-31 11:53:04	950696	-2.36284e-11	-1.8019e-11	6.64242e-09	-5.79639e-11	4.68454e-10
2022-03-31 11:53:18	964739	-1.43404e-11	-6.32712e-12	6.61247e-09	-5.52226e-11	4.61504e-10
2022-03-31 11:53:32	978783	-1.38674e-11	-1.48247e-11	6.60114e-09	-5.00411e-11	4.5282e-10
2022-03-31 11:53:46	992826	-2.37252e-11	-1.49885e-11	6.56555e-09	-5.92969e-11	4.49288e-10
2022-03-31 11:54:00	1006869	-2.61869e-11	-6.78784e-12	6.53765e-09	-5.09011e-11	4.40749e-10
2022-03-31 11:54:14	1020913	-2.78854e-11	-1.63399e-11	6.52577e-09	-5.16536e-11	4.37033e-10
2022-03-31 11:54:28	1034956	-2.24567e-11	-2.00666e-11	6.54582e-09	-6.69508e-11	4.32164e-10
2022-03-31 11:54:42	1048999	-2.29942e-11	-1.5439e-11	6.38298e-09	-4.91704e-11	4.28018e-10
2022-03-31 11:54:57	1063042	-3.23037e-11	-1.88483e-11	6.39479e-09	-5.66309e-11	4.32241e-10
2022-03-31 11:55:11	1077086	-4.26236e-11	-2.5585e-11	6.47156e-09	-6.28874e-11	4.24271e-10
2022-03-31 11:55:25	1091129	-3.07234e-11	-2.66804e-11	6.44384e-09	-5.91034e-11	4.1908e-10
2022-03-31 11:55:39	1105172	-4.44404e-11	-1.2818e-11	6.45488e-09	-7.37341e-11	4.06188e-10
2022-03-31 11:55:53	1119216	-4.43651e-11	-2.07013e-11	6.4258e-09	-6.86708e-11	4.0896e-10
2022-03-31 11:56:07	1133259	-4.36879e-11	-2.4254e-11	6.38663e-09	-6.24144e-11	4.11931e-10
2022-03-31 11:56:21	1147303	-4.36019e-11	-1.7978e-11	6.34811e-09	-5.90174e-11	4.04529e-10
2022-03-31 11:56:35	1161346	-4.14734e-11	-2.48478e-11	6.30449e-09	-6.52954e-11	3.97841e-10
2022-03-31 11:56:49	1175389	-2.86379e-11	-1.28078e-11	6.29952e-09	-5.48894e-11	4.0069e-10
2022-03-31 11:57:03	1189432	-3.84956e-11	-1.59099e-11	6.29065e-09	-5.84369e-11	3.94255e-10
2022-03-31 11:57:17	1203476	-3.85816e-11	-2.95573e-11	6.27839e-09	-7.33578e-11	3.86016e-10
2022-03-31 11:57:31	1217519	-4.34836e-11	5.57975e-12	6.25143e-09	-6.95093e-11	3.87483e-10
2022-03-31 11:57:45	1231563	-4.27956e-11	-1.60226e-11	6.25103e-09	-7.46908e-11	3.83336e-10
2022-03-31 11:57:59	1245606	-5.05356e-11	-3.97134e-11	6.26744e-09	-7.40243e-11	3.81225e-10
2022-03-31 11:58:13	1259649	-5.29006e-11	-3.63451e-11	6.22695e-09	-7.32718e-11	3.66866e-10
2022-03-31 11:58:27	1273692	-5.89206e-11	-4.37063e-11	6.36423e-09	-8.52258e-11	3.81555e-10
2022-03-31 11:58:41	1287736	-4.86114e-11	-3.54442e-11	5.46102e-09	-8.20976e-11	3.78983e-10
2022-03-31 11:58:55	1301779	-5.44809e-11	-4.42591e-11	5.35149e-09	-7.56691e-11	3.83697e-10
2022-03-31 11:59:09	1315823	-6.18231e-11	-2.48888e-11	5.35593e-09	-7.76148e-11	3.68041e-10
2022-03-31 11:59:23	1329866	-6.05116e-11	-3.9949e-11	5.59683e-09	-7.16916e-11	3.62551e-10
2022-03-31 11:59:37	1343909	-5.24921e-11	-4.53444e-11	5.6946e-09	-8.66126e-11	3.62827e-10
2022-03-31 11:59:51	1357953	-6.09739e-11	-3.93756e-11	5.77252e-09	-8.13343e-11	3.57782e-10
2022-03-31 12:00:05	1371996	-4.77621e-11	-4.06144e-11	9.41967e-09	-6.97996e-11	3.85993e-10
2022-03-31 12:00:20	1386039	-5.31049e-11	-4.54468e-11	9.41967e-09	-8.52043e-11	3.99738e-10
2022-03-31 12:00:34	1400083	-5.49969e-11	-4.76787e-11	9.41967e-09	-7.09283e-11	3.43139e-10
2022-03-31 12:00:48	1414126	-6.17694e-11	-5.29513e-11	9.41967e-09	-6.78216e-11	3.2878e-10
2022-03-31 12:01:02	1428169	-6.90793e-11	-5.22653e-11	9.41967e-09	-6.27046e-11	3.03164e-10
2022-03-31 12:01:16	1442213	-7.11111e-11	-4.89891e-11	9.41967e-09	-6.69294e-11	2.87454e-10
2022-03-31 12:01:30	1456256	-6.69078e-11	-5.60023e-11	9.41967e-09	-6.00386e-11	2.79876e-10
2022-03-31 12:01:44	1470299	-6.57683e-11	-5.9043e-11	9.41967e-09	-6.71981e-11	2.59926e-10
2022-03-31 12:01:58	1484342	-7.42931e-11	-5.44666e-11	9.41967e-09	-6.21349e-11	3.36605e-10
2022-03-31 12:02:12	1498386	1.9294e-09	-4.55491e-11	9.41967e-09	1.29859e-11	1.65183e-09
2022-03-31 12:02:29	1515680	9.98671e-09	-4.98082e-11	9.41967e-09	5.55881e-11	2.59839e-09
2022-03-31 12:02:41	1527513	1.13036e-08	-4.22832e-11	9.41967e-09	7.55508e-11	2.80321e-09
2022-03-31 12:02:53	1539347	1.13036e-08	-3.98261e-11	9.41967e-09	8.85691e-11	2.67527e-09
2022-03-31 12:03:05	1551180	1.13036e-08	-3.94677e-11	9.41967e-09	9.72013e-11	2.42149e-09
2022-03-31 12:03:17	1563013	1.13036e-08	-3.99694e-11	9.41967e-09	9.18908e-11	2.11517e-09
2022-03-31 12:03:28	1574847	1.13036e-08	-4.24982e-11	9.41967e-09	8.36348e-11	1.84814e-09
2022-03-31 12:03:40	1586680	1.13036e-08	-3.49118e-11	9.41967e-09	7.59916e-11	1.62114e-09
2022-03-31 12:03:52	1598513	1.13036e-08	-3.23728e-11	9.41967e-09	6.84128e-11	1.44539e-09
2022-03-31 12:04:04	1610347	1.13036e-08	-4.18737e-11	9.41967e-09	6.84558e-11	1.29082e-09
2022-03-31 12:04:16	1622180	1.13036e-08	-5.48044e-11	9.41967e-09	6.56393e-11	1.16339e-09
2022-03-31 12:04:28	1634013	1.13036e-08	-4.67061e-11	9.41967e-09	5.28039e-11	9.35486e-10
2022-03-31 12:04:39	1645847	8.07535e-09	-5.12723e-11	9.41967e-09	2.83799e-12	7.47629e-10
2022-03-31 12:04:51	1657680	5.36594e-09	-4.49349e-11	9.41967e-09	-1.82749e-11	6.62061e-10
2022-03-31 12:05:03	1669513	3.80382e-09	-5.48966e-11	9.41967e-09	-4.48274e-11	5.91218e-10
2022-03-31 12:05:15	1681347	2.72663e-09	-5.61558e-11	9.41967e-09	-4.05274e-11	5.30819e-10
2022-03-31 12:05:27	1693180	2.00719e-09	-5.49477e-11	9.41967e-09	-5.51044e-11	4.89216e-10
2022-03-31 12:05:39	1705013	1.4649e-09	-5.53266e-11	9.41967e-09	-5.89421e-11	4.56574e-10
2022-03-31 12:05:50	1716847	1.06678e-09	-6.1152e-11	9.41967e-09	-4.39674e-11	4.37854e-10
2022-03-31 12:06:03	1729720	7.59712e-10	-6.50731e-11	9.41967e-09	-7.04231e-11	4.03193e-10
2022-03-31 12:06:17	1743763	5.13311e-10	-6.22372e-11	9.41967e-09	-6.49191e-11	3.73676e-10
2022-03-31 12:06:31	1757807	3.52169e-10	-6.11213e-11	9.41967e-09	-7.24226e-11	4.45932e-10
2022-03-31 12:06:45	1771850	2.24921e-10	-6.05787e-11	9.41967e-09	-6.97458e-11	6.18669e-10
2022-03-31 12:06:59	1785893	1.14777e-10	-6.61174e-11	9.41967e-09	-9.05256e-11	7.13661e-10
2022-03-31 12:07:13	1799937	4.41824e-11	-5.74151e-11	9.41967e-09	-7.36588e-11	7.47821e-10
2022-03-31 12:07:27	1813980	1.49639e-11	-5.51013e-11	9.41967e-09	-7.85393e-11	7.52736e-10
2022-03-31 12:07:42	1828023	-1.80707e-11	-5.9258e-11	9.41967e-09	-8.43658e-11	7.40821e-10
2022-03-31 12:07:56	1842067	-4.15486e-11	-5.9391e-11	9.41967e-09	-9.03213e-11	7.06665e-10
2022-03-31 12:08:10	1856110	-3.70874e-11	-5.51628e-11	9.41967e-09	-8.92248e-11	6.79299e-10
2022-03-31 12:08:24	1870153	-5.03636e-11	-6.30972e-11	9.41967e-09	-1.01952e-10	6.52992e-10
2022-03-31 12:08:38	1884197	-6.08986e-11	-5.74663e-11	9.41967e-09	-9.42666e-11	6.36199e-10
2022-03-31 12:08:52	1898240	-5.90174e-11	-5.23268e-11	9.20742e-09	-9.82978e-11	6.02521e-10
2022-03-31 12:09:06	1912283	-5.50614e-11	-5.23882e-11	8.19309e-09	-8.64728e-11	5.80752e-10
2022-03-31 12:09:20	1926327	-6.49406e-11	-6.89944e-11	7.5492e-09	-1.02963e-10	5.59237e-10
2022-03-31 12:09:34	1940370	-5.11376e-11	-5.55313e-11	7.15614e-09	-1.02361e-10	5.42306e-10
2022-03-31 12:09:48	1954413	-6.05869e-11	-5.97085e-11	6.91555e-09	-1.07661e-10	5.21013e-10
2022-03-31 12:10:02	1968457	-6.52094e-11	-5.51934e-11	6.63854e-09	-1.03726e-10	5.01924e-10
2022-03-31 12:10:16	1982500	-7.46586e-11	-6.48479e-11	6.55396e-09	-9.19553e-11	4.99951e-10
2022-03-31 12:10:30	1996543	-8.00766e-11	-6.46534e-11	6.47958e-09	-9.93405e-11	4.78512e-10
2022-03-31 12:10:44	2010587	-7.70451e-11	-6.99568e-11	6.41688e-09	-1.03339e-10	4.71409e-10
2022-03-31 12:10:58	2024630	-7.88941e-11	-5.4528e-11	6.38153e-09	-1.02619e-10	4.51837e-10
2022-03-31 12:11:12	2038673	-7.48306e-11	-6.98441e-11	6.27709e-09	-1.01372e-10	4.48804e-10
2022-03-31 12:11:26	2052717	-6.54781e-11	-5.99542e-11	6.30533e-09	-1.14121e-10	4.36879e-10
2022-03-31 12:11:40	2066760	-6.93696e-11	-6.44794e-11	6.22767e-09	-9.80505e-11	4.34514e-10
2022-03-31 12:11:54	2080803	-7.68086e-11	-6.31894e-11	6.24596e-09	-1.12047e-10	4.29815e-10
2022-03-31 12:12:08	2094847	-8.16353e-11	-6.41517e-11	6.21031e-09	-9.62338e-11	4.17959e-10
2022-03-31 12:12:22	2108890	-7.09821e-11	-6.0589e-11	6.19569e-09	-1.07843e-10	4.08023e-10
2022-03-31 12:12:36	2122933	-8.20008e-11	-6.93936e-11	6.18702e-09	-9.60833e-11	4.04783e-10
2022-03-31 12:12:50	2136977	-8.33983e-11	-5.1559e-11	6.12027e-09	-1.07349e-10	3.97619e-10
2022-03-31 12:13:05	2151020	-8.13343e-11	-6.29744e-11	6.1396e-09	-1.0034e-10	3.92827e-10
2022-03-31 12:13:19	2165063	-7.98831e-11	-6.15923e-11	6.07763e-09	-1.01125e-10	3.87314e-10
2022-03-31 12:13:33	2179107	-7.90016e-11	-6.58308e-11	6.07282e-09	-1.09187e-10	3.86446e-10
2022-03-31 12:13:47	2193150	-8.10118e-11	-6.50527e-11	6.05233e-09	-1.09155e-10	3.75289e-10
2022-03-31 12:14:01	2207193	-8.62148e-11	-6.1408e-11	6.04117e-09	-1.08671e-10	3.79113e-10
2022-03-31 12:14:15	2221237	-7.87113e-11	-6.83187e-11	6.04746e-09	-1.13896e-10	3.65891e-10
2022-03-31 12:14:29	2235280	-9.44171e-11	-7.09498e-11	6.05693e-09	-1.08144e-10	3.61153e-10
2022-03-31 12:14:43	2249323	-8.83648e-11	-6.99465e-11	6.02801e-09	-1.09402e-10	3.65829e-10
2022-03-31 12:14:57	2263367	-8.49786e-11	-6.09985e-11	5.97718e-09	-1.12401e-10	3.60477e-10
2022-03-31 12:15:11	2277410	-9.12996e-11	-6.34965e-11	6.01757e-09	-1.09359e-10	3.59249e-10
2022-03-31 12:15:25	2291453	-8.01841e-11	-7.02946e-11	5.98694e-09	-1.06919e-10	3.48852e-10
2022-03-31 12:15:39	2305496	-8.81606e-11	-7.57003e-11	5.96349e-09	-1.13154e-10	3.53797e-10
2022-03-31 12:15:53	2319540	-8.87948e-11	-7.33046e-11	5.94735e-09	-1.1568e-10	3.49244e-10
2022-03-31 12:16:07	2333583	-9.23961e-11	-6.28413e-11	5.93869e-09	-1.18067e-10	3.52315e-10
2022-03-31 12:16:21	2347626	-9.22026e-11	-8.07784e-11	5.9358e-09	-1.09477e-10	3.40629e-10
2022-03-31 12:16:35	2361670	-8.45593e-11	-6.63836e-11	5.92924e-09	-1.07908e-10	3.33326e-10
2022-03-31 12:16:49	2375713	-8.95796e-11	-7.05915e-11	5.93243e-09	-1.04124e-10	3.43961e-10
2022-03-31 12:17:03	2389757	-8.69458e-11	-7.06939e-11	5.92687e-09	-1.13089e-10	3.4006e-10
2022-03-31 12:17:17	2403800	-9.27186e-11	-7.77274e-11	5.93566e-09	-1.16615e-10	3.33487e-10
2022-03-31 12:17:31	2417843	-9.25573e-11	-6.13977e-11	5.93727e-09	-1.14068e-10	3.4059e-10
2022-03-31 12:17:45	2431887	-9.42343e-11	-6.92401e-11	5.91719e-09	-1.07747e-10	3.31406e-10
2022-03-31 12:17:59	2445930	-8.60106e-11	-5.91966e-11	5.92904e-09	-1.04995e-10	3.29556e-10
2022-03-31 12:18:13	2459973	-9.53416e-11	-7.0786e-11	5.9431e-09	-1.15401e-10	3.22891e-10
2022-03-31 12:18:28	2474017	-9.06868e-11	-5.8572e-11	5.88723e-09	-1.14906e-10	3.31583e-10
2022-03-31 12:18:42	2488060	-8.89668e-11	-6.25034e-11	5.9031e-09	-1.07327e-10	3.20403e-10
2022-03-31 12:18:56	2502103	-9.09448e-11	-6.42849e-11	5.88671e-09	-1.19916e-10	3.26884e-10
2022-03-31 12:19:10	2516146	-9.01816e-11	-7.50041e-11	5.90047e-09	-1.02769e-10	3.22361e-10
2022-03-31 12:19:24	2530190	-9.43633e-11	-7.83827e-11	6.09544e-09	-1.10875e-10	3.18767e-10
2022-03-31 12:19:38	2544233	-8.51076e-11	-7.52601e-11	5.26309e-09	-1.08757e-10	3.29349e-10
2022-03-31 12:19:52	2558276	-9.06331e-11	-6.37525e-11	5.08827e-09	-1.19131e-10	3.26361e-10
2022-03-31 12:20:06	2572320	-9.23208e-11	-7.67753e-11	5.09569e-09	-1.12455e-10	3.19604e-10
2022-03-31 12:20:20	2586363	-1.01189e-10	-8.3512e-11	5.29709e-09	-1.34224e-10	3.11381e-10
2022-03-31 12:20:34	2600406	-9.13856e-11	-7.21989e-11	5.44118e-09	-1.22184e-10	3.13754e-10
2022-03-31 12:20:48	2614449	-9.68143e-11	-7.56389e-11	5.51009e-09	-1.22377e-10	3.09476e-10
2022-03-31 12:21:02	2628493	-9.45783e-11	-7.80858e-11	7.39968e-09	-1.22044e-10	3.29525e-10
2022-03-31 12:21:16	2642536	-9.36323e-11	-8.48941e-11	9.41967e-09	-1.12584e-10	3.41796e-10
2022-03-31 12:21:30	2656579	-9.31486e-11	-8.0461e-11	9.41967e-09	-1.11423e-10	3.06282e-10
2022-03-31 12:21:44	2670623	-1.01393e-10	-9.21325e-11	9.41967e-09	-1.10574e-10	2.86271e-10
2022-03-31 12:21:58	2684666	-1.0048e-10	-8.83955e-11	9.41967e-09	-1.07661e-10	2.66791e-10
2022-03-31 12:22:12	2698709	-1.09252e-10	-9.28798e-11	9.41967e-09	-1.00082e-10	2.534e-10
2022-03-31 12:22:26	2712753	-9.96415e-11	-9.46305e-11	9.41967e-09	-9.35141e-11	2.29159e-10
2022-03-31 12:22:40	2726796	-1.02662e-10	-9.07298e-11	9.41967e-09	-1.09402e-10	2.28629e-10
2022-03-31 12:22:54	2740839	-1.0866e-10	-9.33098e-11	9.41967e-09	-1.02017e-10	2.24275e-10
2022-03-31 12:23:08	2754883	2.95226e-10	-9.40879e-11	9.41967e-09	-6.28229e-11	1.03695e-09
2022-03-31 12:23:26	2772177	7.08176e-09	-7.8567e-11	9.41967e-09	2.66599e-12	2.12906e-09
2022-03-31 12:23:38	2784010	8.99457e-09	-7.8956e-11	9.41967e-09	1.35234e-11	2.46701e-09
2022-03-31 12:23:49	2795843	1.06117e-08	-8.03177e-11	9.41967e-09	3.70336e-11	2.39939e-09
2022-03-31 12:24:01	2807677	1.13036e-08	-9.42722e-11	9.41967e-09	4.45479e-11	2.18574e-09
2022-03-31 12:24:13	2819510	1.13036e-08	-8.42593e-11	9.41967e-09	4.83319e-11	1.91658e-09
2022-03-31 12:24:25	2831343	1.13036e-08	-7.58436e-11	9.41967e-09	3.92804e-11	1.63699e-09
2022-03-31 12:24:37	2843177	1.13036e-08	-8.12084e-11	9.41967e-09	3.22714e-11	1.41899e-09
2022-03-31 12:24:49	2855010	1.13036e-08	-7.67549e-11	9.41967e-09	2.07474e-11	1.24359e-09
2022-03-31 12:25:00	2866843	1.13036e-08	-8.43208e-11	9.41967e-09	1.69312e-11	1.10426e-09
2022-03-31 12:25:12	2878677	1.13036e-08	-8.63274e-11	9.41967e-09	1.80062e-11	9.82714e-10
2022-03-31 12:25:24	2890510	1.13036e-08	-8.3041e-11	9.41967e-09	1.97477e-11	8.76336e-10
2022-03-31 12:25:36	2902343	9.26235e-09	-8.53036e-11	9.41967e-09	-3.88289e-11	6.51111e-10
2022-03-31 12:25:48	2914176	5.71445e-09	-8.76993e-11	9.41967e-09	-6.45429e-11	5.67e-10
2022-03-31 12:26:00	2926010	4.00319e-09	-8.44744e-11	9.41967e-09	-6.66606e-11	5.09917e-10
2022-03-31 12:26:11	2937843	2.84432e-09	-9.58686e-11	9.41967e-09	-8.10548e-11	4.59769e-10
2022-03-31 12:26:23	2949676	2.05766e-09	-8.74844e-11	9.41967e-09	-6.65853e-11	4.16654e-10
2022-03-31 12:26:35	2961510	1.50822e-09	-8.11265e-11	9.41967e-09	-8.22158e-11	3.92528e-10
2022-03-31 12:26:47	2973343	1.08971e-09	-9.14055e-11	9.41967e-09	-9.49868e-11	3.73331e-10
2022-03-31 12:27:00	2986217	7.46844e-10	-8.93068e-11	9.41967e-09	-9.48901e-11	3.44959e-10
2022-03-31 12:27:14	3000260	5.04109e-10	-9.79886e-11	9.41967e-09	-1.02479e-10	3.14744e-10
2022-03-31 12:27:28	3014303	3.33969e-10	-9.56438e-11	9.41967e-09	-1.18206e-10	3.39684e-10
2022-03-31 12:27:42	3028347	1.94413e-10	-1.05626e-10	9.41967e-09	-1.15465e-10	5.17135e-10
2022-03-31 12:27:56	3042390	7.77868e-11	-1.06496e-10	9.41967e-09	-1.29365e-10	6.35385e-10
2022-03-31 12:28:10	3056433	1.98659e-11	-8.96958e-11	9.41967e-09	-1.18303e-10	6.82677e-10
2022-03-31 12:28:24	3070477	-3.12179e-11	-8.76277e-11	9.41967e-09	-1.34632e-10	6.89872e-10
2022-03-31 12:28:38	3084520	-4.75686e-11	-9.95038e-11	9.41967e-09	-1.31117e-10	6.82309e-10
2022-03-31 12:28:52	3098563	-6.99393e-11	-9.78038e-11	9.41967e-09	-1.28193e-10	6.51848e-10
2022-03-31 12:29:06	3112607	-7.28311e-11	-1.01356e-10	9.41967e-09	-1.26914e-10	6.35285e-10
2022-03-31 12:29:20	3126650	-8.53333e-11	-8.5232e-11	9.41967e-09	-1.31934e-10	6.00417e-10
2022-03-31 12:29:34	3140693	-8.14096e-11	-8.80168e-11	9.41967e-09	-1.13992e-10	5.92393e-10
2022-03-31 12:29:48	3154736	-9.24928e-11	-9.51219e-11	9.12017e-09	-1.29225e-10	5.65188e-10
2022-03-31 12:30:02	3168780	-9.42021e-11	-9.09141e-11	8.06734e-09	-1.26473e-10	5.31863e-10
2022-03-31 12:30:16	3182823	-9.65563e-11	-8.93579e-11	7.37338e-09	-1.28129e-10	5.13526e-10
2022-03-31 12:30:30	3196866	-8.47851e-11	-8.5017e-11	6.97895e-09	-1.2758e-10	5.06416e-10
2022-03-31 12:30:44	3210910	-8.75908e-11	-8.7167e-11	6.7114e-09	-1.20722e-10	4.79656e-10
2022-03-31 12:30:58	3224953	-9.48148e-11	-9.11598e-11	6.52579e-09	-1.32192e-10	4.69644e-10
2022-03-31 12:31:12	3238996	-9.84698e-11	-8.68906e-11	6.39747e-09	-1.27086e-10	4.55499e-10
2022-03-31 12:31:27	3253039	-9.46428e-11	-8.9276e-11	6.3027e-09	-1.19969e-10	4.43621e-10
2022-03-31 12:31:41	3267083	-8.91711e-11	-8.36144e-11	6.30337e-09	-1.31321e-10	4.2854e-10
2022-03-31 12:31:55	3281126	-8.89346e-11	-7.82906e-11	6.2272e-09	-1.2356e-10	4.30022e-10
2022-03-31 12:32:09	3295169	-1.03758e-10	-8.77096e-11	6.17502e-09	-1.28709e-10	4.05934e-10
2022-03-31 12:32:23	3309213	-1.04188e-10	-8.04201e-11	6.11905e-09	-1.34675e-10	3.98386e-10
2022-03-31 12:32:37	3323256	-9.95018e-11	-1.02912e-10	6.10495e-09	-1.45114e-10	3.91191e-10
2022-03-31 12:32:51	3337299	-1.02382e-10	-8.8631e-11	6.08006e-09	-1.29763e-10	3.89825e-10
2022-03-31 12:33:05	3351343	-1.05016e-10	-9.43848e-11	6.04985e-09	-1.21657e-10	3.73224e-10
2022-03-31 12:33:19	3365386	-1.14175e-10	-9.28287e-11	6.03273e-09	-1.37406e-10	3.74614e-10
2022-03-31 12:33:33	3379429	-1.1396e-10	-7.74715e-11	6.00832e-09	-1.3732e-10	3.63971e-10
2022-03-31 12:33:47	3393473	-1.17368e-10	-8.93989e-11	6.01834e-09	-1.33256e-10	3.62182e-10
2022-03-31 12:34:01	3407516	-1.11531e-10	-9.93086e-11	6.00287e-09	-1.30053e-10	3.54811e-10
2022-03-31 12:34:15	3421559	-1.08789e-10	-8.93374e-11	5.97393e-09	-1.33074e-10	3.50572e-10
2022-03-31 12:34:29	3435603	-1.15003e-10	-1.02257e-10	5.94817e-09	-1.37857e-10	3.56439e-10
2022-03-31 12:34:43	3449646	-1.088e-10	-9.51731e-11	5.93814e-09	-1.34278e-10	3.41964e-10
2022-03-31 12:34:57	3463689	-1.12025e-10	-8.97982e-11	5.97822e-09	-1.41534e-10	3.38071e-10
2022-03-31 12:35:11	3477733	-1.19679e-10	-9.1723e-11	5.94812e-09	-1.39696e-10	3.34363e-10
2022-03-31 12:35:25	3491776	-1.18669e-10	-8.89791e-11	5.91778e-09	-1.34095e-10	3.33188e-10
2022-03-31 12:35:39	3505819	-1.15562e-10	-1.02759e-10	5.90157e-09	-1.31418e-10	3.23927e-10
2022-03-31 12:35:53	3519863	-1.11423e-10	-9.19687e-11	5.88325e-09	-1.38943e-10	3.20833e-10
2022-03-31 12:36:07	3533906	-1.16798e-10	-8.99415e-11	5.8704e-09	-1.24022e-10	3.22876e-10
2022-03-31 12:36:21	3547949	-1.21378e-10	-1.02248e-10	5.87197e-09	-1.41813e-10	3.20564e-10
2022-03-31 12:36:35	3561993	-1.21947e-10	-9.17434e-11	5.88854e-09	-1.36718e-10	3.15289e-10
2022-03-31 12:36:50	3576036	-1.21098e-10	-9.72514e-11	5.87937e-09	-1.29881e-10	3.19021e-10
2022-03-31 12:37:04	3590079	-1.08402e-10	-8.06965e-11	5.8664e-09	-1.24474e-10	3.12249e-10
2022-03-31 12:37:18	3604122	-1.08241e-10	-9.48046e-11	5.85447e-09	-1.34697e-10	3.1039e-10
2022-03-31 12:37:32	3618166	-1.11154e-10	-9.29822e-11	5.87226e-09	-1.44512e-10	3.07058e-10
2022-03-31 12:37:46	3632209	-1.07478e-10	-9.00439e-11	5.84856e-09	-1.36041e-10	3.0986e-10
2022-03-31 12:38:00	3646252	-1.12315e-10	-9.00439e-11	5.855e-09	-1.38642e-10	3.08324e-10
2022-03-31 12:38:14	3660296	-1.02006e-10	-9.05455e-11	5.8239e-09	-9.13103e-11	3.02666e-10
2022-03-31 12:38:28	3674339	-1.1855e-10	-9.45384e-11	5.82113e-09	-1.33514e-10	2.96906e-10
2022-03-31 12:38:42	3688382	-1.19883e-10	-9.33712e-11	5.80794e-09	-1.29257e-10	2.92691e-10
2022-03-31 12:38:56	3702425	-1.07413e-10	-9.90533e-11	5.78963e-09	-1.27548e-10	2.97083e-10
2022-03-31 12:39:10	3716469	-1.11197e-10	-9.09244e-11	5.82057e-09	-1.40136e-10	3.01829e-10
2022-03-31 12:39:24	3730512	-1.1181e-10	-9.52752e-11	5.81659e-09	-1.32418e-10	2.99179e-10
2022-03-31 12:39:38	3744555	-1.02049e-10	-8.70441e-11	5.79373e-09	-1.37685e-10	2.90157e-10
2022-03-31 12:39:52	3758599	-1.16594e-10	-9.0351e-11	5.80424e-09	-1.22345e-10	2.88276e-10
2022-03-31 12:40:06	3772642	-1.0794e-10	-7.71849e-11	5.78991e-09	-1.22109e-10	2.97482e-10
2022-03-31 12:40:20	3786685	-1.1582e-10	-9.4303e-11	6.32586e-09	-1.42512e-10	2.83292e-10
2022-03-31 12:40:34	3800729	-1.13734e-10	-9.68419e-11	5.29083e-09	-1.28892e-10	2.95816e-10
2022-03-31 12:40:48	3814772	-1.20797e-10	-9.77114e-11	5.06538e-09	-1.34342e-10	2.94058e-10
2022-03-31 12:41:02	3828815	-1.14584e-10	-1.01306e-10	5.00444e-09	-1.43942e-10	2.93336e-10
2022-03-31 12:41:16	3842859	-1.20894e-10	-9.72714e-11	5.16969e-09	-1.47199e-10	2.87416e-10
2022-03-31 12:41:30	3856902	-1.12143e-10	-9.59305e-11	5.3361e-09	-1.40384e-10	2.85504e-10
2022-03-31 12:41:44	3870945	-1.21259e-10	-1.0108e-10	5.43045e-09	-1.54498e-10	2.85189e-10
2022-03-31 12:41:58	3884988	-1.15433e-10	-8.40955e-11	5.71133e-09	-1.42835e-10	2.89574e-10
2022-03-31 12:42:13	3899032	-1.12509e-10	-9.95952e-11	9.41967e-09	-1.29107e-10	3.18652e-10
2022-03-31 12:42:27	3913075	-1.16712e-10	-9.58276e-11	9.41967e-09	-1.25183e-10	2.88399e-10
2022-03-31 12:42:41	3927118	-1.19496e-10	-1.00947e-10	9.41967e-09	-1.24205e-10	2.63266e-10
2022-03-31 12:42:55	3941162	-1.18024e-10	-1.05533e-10	9.41967e-09	-1.2041e-10	2.44446e-10
2022-03-31 12:43:09	3955205	-1.1525e-10	-1.0879e-10	9.41967e-09	-1.08381e-10	2.26425e-10
2022-03-31 12:43:23	3969248	-1.2629e-10	-1.05513e-10	9.41967e-09	-1.09488e-10	2.28874e-10
2022-03-31 12:43:37	3983292	-1.07112e-10	-1.03199e-10	9.41967e-09	-1.04973e-10	2.09171e-10
2022-03-31 12:43:51	3997335	-1.24506e-10	-9.13544e-11	9.41967e-09	-1.05403e-10	1.97646e-10
2022-03-31 12:44:05	4011378	-8.52903e-11	-1.02585e-10	9.41967e-09	-1.00619e-10	6.33972e-10
2022-03-31 12:44:19	4025422	3.81454e-09	-9.69029e-11	9.41967e-09	-2.65202e-11	1.78922e-09
2022-03-31 12:44:36	4042716	7.87567e-09	-8.69008e-11	9.41967e-09	-6.77248e-13	2.31356e-09
2022-03-31 12:44:48	4054549	9.7015e-09	-9.14771e-11	9.41967e-09	1.81459e-11	2.29263e-09
2022-03-31 12:45:01	4067423	1.09058e-08	-9.27365e-11	9.41967e-09	1.85974e-11	2.08469e-09
2022-03-31 12:45:12	4078726	1.16382e-08	-9.375e-11	9.41967e-09	1.22442e-11	1.82645e-09
2022-03-31 12:45:24	4090030	1.22611e-08	-9.0177e-11	9.41967e-09	1.07392e-11	1.57523e-09
2022-03-31 12:45:35	4101333	1.25298e-08	-9.34122e-11	9.41967e-09	6.29949e-12	1.37092e-09
2022-03-31 12:45:46	4112636	1.2695e-08	-9.33508e-11	9.41967e-09	8.69673e-12	1.19804e-09
2022-03-31 12:45:57	4123939	1.29799e-08	-9.77524e-11	9.41967e-09	1.37169e-11	1.05654e-09
2022-03-31 12:46:09	4135243	1.30189e-08	-8.89791e-11	9.41967e-09	7.19173e-12	9.51807e-10
2022-03-31 12:46:20	4146546	1.2898e-08	-8.96241e-11	9.41967e-09	-5.14924e-12	8.63757e-10
2022-03-31 12:46:31	4157849	1.13352e-08	-9.72514e-11	9.41967e-09	-3.49589e-11	6.5055e-10
2022-03-31 12:46:43	4169663	6.19353e-09	-9.1252e-11	9.41967e-09	-6.55211e-11	5.4775e-10
2022-03-31 12:46:55	4181496	4.19789e-09	-9.9381e-11	9.41967e-09	-7.62066e-11	4.88072e-10
2022-03-31 12:47:07	4193329	2.96679e-09	-1.09936e-10	9.41967e-09	-9.39763e-11	4.4306e-10
2022-03-31 12:47:19	4205163	2.12631e-09	-9.92371e-11	9.41967e-09	-1.06661e-10	3.97304e-10
2022-03-31 12:47:30	4216996	1.55081e-09	-1.03302e-10	9.41967e-09	-1.04726e-10	3.68586e-10
2022-03-31 12:47:42	4228829	1.12961e-09	-1.00271e-10	9.41967e-09	-1.15035e-10	3.4489e-10
2022-03-31 12:47:55	4241703	7.45844e-10	-1.11206e-10	9.41967e-09	-1.13466e-10	3.21785e-10
2022-03-31 12:48:09	4255747	5.18202e-10	-1.11277e-10	9.41967e-09	-1.18593e-10	3.04554e-10
2022-03-31 12:48:23	4269790	3.45633e-10	-1.07632e-10	9.41967e-09	-1.22657e-10	2.91201e-10
2022-03-31 12:48:37	4283833	2.0397e-10	-1.13417e-10	9.41967e-09	-1.25097e-10	4.46639e-10
2022-03-31 12:48:51	4297877	9.74378e-11	-1.03281e-10	9.41967e-09	-1.26989e-10	5.83594e-10
2022-03-31 12:49:05	4311920	5.51474e-12	-1.0363e-10	9.41967e-09	-1.36997e-10	6.44484e-10
2022-03-31 12:49:19	4325963	-3.06267e-11	-1.14308e-10	9.41967e-09	-1.37481e-10	6.64971e-10
2022-03-31 12:49:34	4340007	-6.82946e-11	-1.0711e-10	9.41967e-09	-1.36847e-10	6.48454e-10
2022-03-31 12:49:48	4354050	-8.00658e-11	-1.11564e-10	9.41967e-09	-1.40115e-10	6.39001e-10
2022-03-31 12:50:02	4368093	-8.35811e-11	-1.03199e-10	9.41967e-09	-1.39534e-10	6.25472e-10
2022-03-31 12:50:16	4382137	-9.22563e-11	-1.06537e-10	9.41967e-09	-1.26194e-10	5.84215e-10
2022-03-31 12:50:30	4396180	-9.10953e-11	-9.44155e-11	9.41967e-09	-1.50059e-10	5.67814e-10
2022-03-31 12:50:44	4410223	-9.7771e-11	-1.0752e-10	9.40933e-09	-1.33117e-10	5.37729e-10
2022-03-31 12:50:58	4424267	-1.06446e-10	-9.99333e-11	8.22718e-09	-1.49672e-10	5.18341e-10
2022-03-31 12:51:12	4438310	-1.17024e-10	-9.57667e-11	7.45904e-09	-1.44963e-10	5.00588e-10
2022-03-31 12:51:26	4452353	-1.03425e-10	-1.16355e-10	7.02394e-09	-1.4693e-10	4.77345e-10
2022-03-31 12:51:40	4466397	-1.06553e-10	-1.15976e-10	6.6937e-09	-1.38739e-10	4.59078e-10
2022-03-31 12:51:54	4480440	-1.18851e-10	-1.04182e-10	6.48666e-09	-1.53402e-10	4.58333e-10
2022-03-31 12:52:08	4494483	-1.1496e-10	-9.79067e-11	6.35927e-09	-1.37481e-10	4.39251e-10
2022-03-31 12:52:22	4508527	-1.26591e-10	-1.12383e-10	6.27411e-09	-1.51316e-10	4.1746e-10
2022-03-31 12:52:36	4522570	-1.28064e-10	-1.00783e-10	6.18962e-09	-1.38814e-10	3.99162e-10
2022-03-31 12:52:50	4536613	-1.14175e-10	-1.17297e-10	6.13534e-09	-1.26828e-10	3.99446e-10
2022-03-31 12:53:04	4550657	-1.2385e-10	-1.06916e-10	6.0936e-09	-1.49113e-10	3.87866e-10
2022-03-31 12:53:18	4564700	-1.20991e-10	-9.87152e-11	6.0555e-09	-1.45769e-10	3.91521e-10
2022-03-31 12:53:32	4578743	-1.2084e-10	-9.4395e-11	6.05139e-09	-1.36417e-10	3.80119e-10
2022-03-31 12:53:46	4592787	-1.19217e-10	-1.05339e-10	5.99737e-09	-1.44576e-10	3.68847e-10
2022-03-31 12:54:00	4606830	-1.18486e-10	-1.02166e-10	5.96728e-09	-1.41007e-10	3.64646e-10
2022-03-31 12:54:14	4620873	-1.16529e-10	-1.00496e-10	5.96123e-09	-1.36008e-10	3.58159e-10
2022-03-31 12:54:28	4634917	-1.25291e-10	-1.03507e-10	5.95334e-09	-1.47597e-10	3.53689e-10
2022-03-31 12:54:42	4648960	-1.13928e-10	-1.02175e-10	5.91587e-09	-1.47382e-10	3.54956e-10
2022-03-31 12:54:57	4663003	-1.12057e-10	-9.96981e-11	5.91058e-09	-1.41115e-10	3.43792e-10
2022-03-31 12:55:11	4677046	-1.20066e-10	-9.90733e-11	5.91559e-09	-1.46726e-10	3.41542e-10
2022-03-31 12:55:25	4691090	-1.11058e-10	-1.05943e-10	5.90202e-09	-1.45952e-10	3.41296e-10
2022-03-31 12:55:39	4705133	-1.07188e-10	-9.84695e-11	5.87018e-09	-1.39749e-10	3.28757e-10
2022-03-31 12:55:53	4719176	-1.24388e-10	-9.461e-11	5.87951e-09	-1.44834e-10	3.30024e-10
2022-03-31 12:56:07	4733220	-1.21851e-10	-1.04787e-10	5.86291e-09	-1.38416e-10	3.19205e-10
2022-03-31 12:56:21	4747263	-1.12982e-10	-1.05595e-10	5.84038e-09	-1.41416e-10	3.27981e-10
2022-03-31 12:56:35	4761306	-1.29472e-10	-9.98314e-11	5.84125e-09	-1.3861e-10	3.16003e-10
2022-03-31 12:56:49	4775350	-1.2844e-10	-1.0539e-10	5.85227e-09	-1.32536e-10	3.20226e-10
2022-03-31 12:57:03	4789393	-1.19593e-10	-9.59305e-11	5.81944e-09	-1.39782e-10	3.06751e-10
2022-03-31 12:57:17	4803436	-1.18314e-10	-9.50912e-11	5.8294e-09	-1.34202e-10	3.08248e-10
2022-03-31 12:57:31	4817479	-1.22291e-10	-8.72693e-11	5.83348e-09	-1.35912e-10	3.10029e-10
2022-03-31 12:57:45	4831523	-1.1338e-10	-9.94314e-11	5.78364e-09	-1.3187e-10	3.05015e-10
2022-03-31 12:57:59	4845566	-1.11724e-10	-1.00793e-10	5.81118e-09	-1.47092e-10	3.09139e-10
2022-03-31 12:58:13	4859609	-1.24871e-10	-1.01848e-10	5.7848e-09	-1.42523e-10	3.01829e-10
2022-03-31 12:58:27	4873653	-1.26581e-10	-9.6801e-11	5.79434e-09	-1.55778e-10	2.87746e-10
2022-03-31 12:58:41	4887696	-1.3288e-10	-1.10591e-10	5.76742e-09	-1.5309e-10	2.96054e-10
2022-03-31 12:58:55	4901739	-1.21775e-10	-1.0022e-10	5.78427e-09	-1.49381e-10	2.85519e-10
2022-03-31 12:59:09	4915782	-1.17357e-10	-1.0923e-10	5.78185e-09	-1.34589e-10	3.0169e-10
2022-03-31 12:59:23	4929826	-1.27021e-10	-1.06281e-10	5.79272e-09	-1.36675e-10	2.88959e-10
2022-03-31 12:59:37	4943869	-1.18303e-10	-9.84486e-11	5.77488e-09	-1.43523e-10	2.83922e-10
2022-03-31 12:59:51	4957912	-1.21829e-10	-9.6381e-11	5.77871e-09	-1.46167e-10	2.92e-10
2022-03-31 13:00:05	4971956	-1.30569e-10	-9.7179e-11	5.80278e-09	-1.4162e-10	2.91232e-10
2022-03-31 13:00:19	4985999	-1.2428e-10	-9.934e-11	5.77333e-09	-1.43157e-10	2.81549e-10
2022-03-31 13:00:34	5000042	-1.19281e-10	-9.92886e-11	5.75972e-09	-1.40276e-10	2.80943e-10
2022-03-31 13:00:48	5014085	-1.19378e-10	-1.06087e-10	5.75611e-09	-1.42297e-10	2.81142e-10
2022-03-31 13:01:02	5028129	-1.15164e-10	-1.03936e-10	5.75696e-09	-1.47242e-10	2.67682e-10
2022-03-31 13:01:16	5042172	-1.22216e-10	-1.12025e-10	5.75568e-09	-1.44264e-10	2.53569e-10
2022-03-31 13:01:30	5056215	-1.26387e-10	-9.93086e-11	5.75522e-09	-1.45909e-10	2.82294e-10
2022-03-31 13:01:44	5070259	-1.20636e-10	-1.00353e-10	5.08636e-09	-1.38986e-10	2.85051e-10
2022-03-31 13:01:58	5084302	-1.24914e-10	-1.04438e-10	5.00918e-09	-1.42136e-10	2.88851e-10
2022-03-31 13:02:12	5098345	-1.15411e-10	-1.03332e-10	5.11283e-09	-1.45318e-10	2.82924e-10
2022-03-31 13:02:26	5112388	-1.24108e-10	-1.00487e-10	5.27938e-09	-1.41867e-10	2.78294e-10
2022-03-31 13:02:40	5126432	-1.24259e-10	-1.06895e-10	5.36237e-09	-1.39309e-10	2.91424e-10
2022-03-31 13:02:54	5140475	-1.2614e-10	-9.95238e-11	5.45728e-09	-1.44576e-10	2.66622e-10
2022-03-31 13:03:08	5154518	-1.24689e-10	-1.0063e-10	9.41967e-09	-1.31579e-10	3.0513e-10
2022-03-31 13:03:22	5168562	-1.13046e-10	-9.8981e-11	9.41967e-09	-1.42684e-10	3.08386e-10
2022-03-31 13:03:36	5182605	-1.36546e-10	-1.10704e-10	9.41967e-09	-1.35933e-10	2.60464e-10
2022-03-31 13:03:50	5196648	-1.29053e-10	-1.174e-10	9.41967e-09	-1.23065e-10	2.405e-10
2022-03-31 13:04:04	5210692	-1.24506e-10	-1.02227e-10	9.41967e-09	-1.30107e-10	2.28045e-10
2022-03-31 13:04:18	5224735	-1.27333e-10	-1.07776e-10	9.41967e-09	-1.22087e-10	2.08787e-10
2022-03-31 13:04:32	5238778	-1.34783e-10	-1.08431e-10	9.41967e-09	-1.28172e-10	2.02261e-10
2022-03-31 13:04:46	5252822	-1.30322e-10	-1.23256e-10	9.41967e-09	-1.23517e-10	1.90751e-10
2022-03-31 13:05:00	5266865	-1.33923e-10	-1.07848e-10	9.41967e-09	-1.25258e-10	3.14989e-10
2022-03-31 13:05:14	5280908	1.46376e-09	-1.0108e-10	9.41967e-09	-6.31561e-11	1.43769e-09
2022-03-31 13:05:32	5298203	6.68293e-09	-1.05278e-10	9.41967e-09	-2.85949e-11	2.11186e-09
2022-03-31 13:05:44	5310036	8.53049e-09	-1.11635e-10	9.41967e-09	-1.18249e-12	2.22891e-09
2022-03-31 13:05:55	5321869	9.96003e-09	-8.37987e-11	9.41967e-09	1.27924e-12	2.09795e-09
2022-03-31 13:06:08	5334743	1.11692e-08	-9.44565e-11	9.41967e-09	9.05148e-12	1.84334e-09
2022-03-31 13:06:20	5346047	1.1778e-08	-1.02411e-10	9.41967e-09	1.26849e-12	1.59662e-09
2022-03-31 13:06:31	5357350	1.21206e-08	-9.15079e-11	9.41967e-09	-2.34349e-12	1.37906e-09
2022-03-31 13:06:42	5368653	1.24538e-08	-1.12506e-10	9.41967e-09	6.87998e-13	1.20415e-09
2022-03-31 13:06:53	5379957	1.25741e-08	-9.9299e-11	9.41967e-09	-1.58024e-12	1.05104e-09
2022-03-31 13:07:05	5391260	1.28362e-08	-1.08329e-10	9.41967e-09	-6.44999e-14	9.31486e-10
2022-03-31 13:07:16	5402563	1.29584e-08	-9.8981e-11	9.41967e-09	-1.18034e-11	8.40879e-10
2022-03-31 13:07:27	5413866	1.17612e-08	-1.09865e-10	9.41967e-09	-1.79847e-11	6.88813e-10
2022-03-31 13:07:39	5425680	7.43454e-09	-1.04315e-10	9.41967e-09	-7.08961e-11	5.48249e-10
2022-03-31 13:07:51	5437513	4.90504e-09	-1.02032e-10	9.41967e-09	-8.75156e-11	4.75364e-10
2022-03-31 13:08:03	5449347	3.41024e-09	-1.14349e-10	9.41967e-09	-9.52771e-11	4.22996e-10
2022-03-31 13:08:15	5461180	2.37783e-09	-1.0925e-10	9.41967e-09	-1.06166e-10	3.90761e-10
2022-03-31 13:08:27	5473013	1.76028e-09	-1.1398e-10	9.41967e-09	-1.09542e-10	3.64363e-10
2022-03-31 13:08:38	5484847	1.26392e-09	-1.15485e-10	9.41967e-09	-1.18647e-10	3.39131e-10
2022-03-31 13:08:50	5496680	9.0604e-10	-1.14277e-10	9.41967e-09	-1.24936e-10	3.11864e-10
2022-03-31 13:09:03	5509553	6.08395e-10	-1.19959e-10	9.41967e-09	-1.26269e-10	2.95271e-10
2022-03-31 13:09:17	5523597	3.96599e-10	-1.13202e-10	9.41967e-09	-1.33149e-10	2.75161e-10
2022-03-31 13:09:31	5537640	2.59558e-10	-1.10816e-10	9.41967e-09	-1.28591e-10	3.59679e-10
2022-03-31 13:09:45	5551683	1.32955e-10	-1.11308e-10	9.41967e-09	-1.28397e-10	5.20161e-10
2022-03-31 13:09:59	5565727	3.68724e-11	-1.09475e-10	9.41967e-09	-1.37341e-10	6.11459e-10
2022-03-31 13:10:13	5579770	-2.23707e-11	-1.08595e-10	9.41967e-09	-1.26925e-10	6.44722e-10
2022-03-31 13:10:27	5593813	-4.76976e-11	-1.08646e-10	9.41967e-09	-1.31536e-10	6.46196e-10
2022-03-31 13:10:41	5607857	-7.33041e-11	-1.13868e-10	9.41967e-09	-1.44297e-10	6.35385e-10
2022-03-31 13:10:55	5621900	-9.42236e-11	-1.05319e-10	9.41967e-09	-1.38524e-10	6.13025e-10
2022-03-31 13:11:09	5635943	-9.28906e-11	-1.07417e-10	9.41967e-09	-1.46232e-10	5.92569e-10
2022-03-31 13:11:23	5649987	-1.05027e-10	-1.03813e-10	9.41967e-09	-1.46468e-10	5.67192e-10
2022-03-31 13:11:38	5664030	-1.00329e-10	-1.11605e-10	9.41967e-09	-1.41534e-10	5.45208e-10
2022-03-31 13:11:52	5678073	-1.04124e-10	-9.85514e-11	8.53717e-09	-1.44049e-10	5.20022e-10
2022-03-31 13:12:06	5692117	-1.1625e-10	-1.101e-10	7.64254e-09	-1.52821e-10	4.96011e-10
2022-03-31 13:12:20	5706160	-1.15325e-10	-1.05339e-10	7.07766e-09	-1.46146e-10	4.79472e-10
2022-03-31 13:12:34	5720203	-1.14154e-10	-1.05923e-10	6.72192e-09	-1.47629e-10	4.62157e-10
2022-03-31 13:12:48	5734247	-1.088e-10	-9.9739e-11	6.51894e-09	-1.44254e-10	4.48381e-10
2022-03-31 13:13:02	5748290	-1.12638e-10	-1.1351e-10	6.36332e-09	-1.49639e-10	4.23365e-10
2022-03-31 13:13:16	5762333	-1.14734e-10	-1.08072e-10	6.26103e-09	-1.47575e-10	4.20109e-10
2022-03-31 13:13:30	5776377	-1.08058e-10	-1.05186e-10	6.18788e-09	-1.48242e-10	4.05451e-10
2022-03-31 13:13:44	5790420	-1.24549e-10	-9.4139e-11	6.10392e-09	-1.45898e-10	4.01435e-10
2022-03-31 13:13:58	5804463	-1.19249e-10	-1.07653e-10	6.08387e-09	-1.4635e-10	3.83605e-10
2022-03-31 13:14:12	5818507	-1.14014e-10	-1.09537e-10	6.01867e-09	-1.53509e-10	3.88312e-10
2022-03-31 13:14:26	5832550	-1.16605e-10	-1.03886e-10	6.01613e-09	-1.41996e-10	3.73561e-10
2022-03-31 13:14:40	5846593	-1.22958e-10	-9.91962e-11	5.98641e-09	-1.47489e-10	3.58212e-10
2022-03-31 13:14:54	5860637	-1.14304e-10	-1.13253e-10	5.96086e-09	-1.41609e-10	3.53927e-10
2022-03-31 13:15:08	5874680	-1.28107e-10	-1.17318e-10	5.91836e-09	-1.51822e-10	3.48437e-10
2022-03-31 13:15:22	5888723	-1.2843e-10	-1.10151e-10	5.89683e-09	-1.53208e-10	3.44022e-10
2022-03-31 13:15:36	5902767	-1.26258e-10	-1.1785e-10	5.91378e-09	-1.48231e-10	3.41964e-10
2022-03-31 13:15:50	5916810	-1.30795e-10	-1.08544e-10	5.87713e-09	-1.56777e-10	3.30101e-10
2022-03-31 13:16:04	5930853	-1.22775e-10	-1.07725e-10	5.87562e-09	-1.4893e-10	3.34056e-10
2022-03-31 13:16:18	5944896	-1.30128e-10	-1.0799e-10	5.84823e-09	-1.53058e-10	3.24734e-10
2022-03-31 13:16:32	5958940	-1.32364e-10	-1.10622e-10	5.85872e-09	-1.53757e-10	3.2673e-10
2022-03-31 13:16:46	5972983	-1.25549e-10	-1.12322e-10	5.87606e-09	-1.55541e-10	3.12832e-10
2022-03-31 13:17:01	5987027	-1.27419e-10	-1.02862e-10	5.84314e-09	-1.48446e-10	3.16049e-10
2022-03-31 13:17:15	6001070	-1.1711e-10	-1.02565e-10	5.82203e-09	-1.44834e-10	3.11127e-10
2022-03-31 13:17:29	6015113	-1.12133e-10	-1.10479e-10	5.82947e-09	-1.50983e-10	3.10467e-10
2022-03-31 13:17:43	6029157	-1.24237e-10	-1.07346e-10	5.81562e-09	-1.49338e-10	3.05506e-10
2022-03-31 13:17:57	6043200	-1.2414e-10	-1.16253e-10	5.80494e-09	-1.53004e-10	2.96339e-10
2022-03-31 13:18:11	6057243	-1.25989e-10	-1.15465e-10	5.79379e-09	-1.53187e-10	3.03471e-10
2022-03-31 13:18:25	6071287	-1.14895e-10	-1.03957e-10	5.81235e-09	-1.46511e-10	3.00369e-10
2022-03-31 13:18:39	6085330	-1.23345e-10	-1.09404e-10	5.774e-09	-1.47371e-10	2.96676e-10
2022-03-31 13:18:53	6099373	-1.24248e-10	-9.90629e-11	5.74671e-09	-1.51445e-10	2.84981e-10
2022-03-31 13:19:07	6113417	-1.2127e-10	-1.1525e-10	5.76248e-09	-1.39771e-10	2.85734e-10
2022-03-31 13:19:21	6127460	-1.32117e-10	-1.07417e-10	5.78037e-09	-1.58508e-10	2.82348e-10
2022-03-31 13:19:35	6141503	-1.27752e-10	-1.07848e-10	5.76828e-09	-1.5639e-10	2.72289e-10
2022-03-31 13:19:49	6155547	-1.37406e-10	-1.05063e-10	5.75323e-09	-1.551e-10	2.82179e-10
2022-03-31 13:20:03	6169590	-1.35052e-10	-1.10857e-10	5.74608e-09	-1.49467e-10	2.7771e-10
2022-03-31 13:20:17	6183633	-1.28634e-10	-1.20594e-10	5.74808e-09	-1.50929e-10	2.7824e-10
2022-03-31 13:20:31	6197676	-1.31816e-10	-1.13355e-10	5.74004e-09	-1.59314e-10	2.70592e-10
2022-03-31 13:20:45	6211720	-1.23474e-10	-1.03804e-10	5.72259e-09	-1.57465e-10	2.704e-10
2022-03-31 13:20:59	6225763	-1.4234e-10	-1.08277e-10	5.71369e-09	-1.54477e-10	2.70546e-10
2022-03-31 13:21:13	6239806	-1.30805e-10	-1.0625e-10	5.71461e-09	-1.56444e-10	2.64664e-10
2022-03-31 13:21:27	6253850	-1.39427e-10	-1.1571e-10	5.72149e-09	-1.49747e-10	2.76251e-10
2022-03-31 13:21:41	6267893	-1.29419e-10	-1.08339e-10	5.73728e-09	-1.5295e-10	2.64196e-10
2022-03-31 13:21:55	6281936	-1.26914e-10	-1.07049e-10	5.69448e-09	-1.48822e-10	2.7255e-10
2022-03-31 13:22:09	6295980	-1.27505e-10	-1.00435e-10	5.70465e-09	-1.55208e-10	2.63827e-10
2022-03-31 13:22:24	6310023	-1.28946e-10	-1.05636e-10	6.11488e-09	-1.49693e-10	2.58959e-10
2022-03-31 13:22:38	6324066	-1.28999e-10	-1.02298e-10	5.14849e-09	-1.44297e-10	2.73471e-10
2022-03-31 13:22:52	6338110	-1.23216e-10	-1.17646e-10	5.00282e-09	-1.45565e-10	2.72105e-10
2022-03-31 13:23:06	6352153	-1.33375e-10	-1.02309e-10	4.99248e-09	-1.53155e-10	2.77349e-10
2022-03-31 13:23:20	6366196	-1.3316e-10	-1.06772e-10	5.17072e-09	-1.48091e-10	2.73041e-10
2022-03-31 13:23:34	6380239	-1.20131e-10	-9.82133e-11	5.32133e-09	-1.46081e-10	2.70984e-10
2022-03-31 13:23:48	6394283	-1.26043e-10	-1.17082e-10	5.38153e-09	-1.54326e-10	2.59796e-10
2022-03-31 13:24:02	6408326	-1.25645e-10	-1.11861e-10	7.39887e-09	-1.56659e-10	2.90825e-10
2022-03-31 13:24:16	6422369	-1.3173e-10	-1.06589e-10	9.41967e-09	-1.44243e-10	2.90188e-10
2022-03-31 13:24:30	6436413	-1.24409e-10	-1.17195e-10	9.41967e-09	-1.2672e-10	2.63789e-10
2022-03-31 13:24:44	6450456	-1.30859e-10	-1.06598e-10	9.41967e-09	-1.35127e-10	2.41229e-10
2022-03-31 13:24:58	6464499	-1.39137e-10	-1.07049e-10	9.41967e-09	-1.24882e-10	2.22924e-10
2022-03-31 13:25:12	6478543	-1.25291e-10	-1.21925e-10	9.41967e-09	-1.31375e-10	2.07574e-10
2022-03-31 13:25:26	6492586	-1.37589e-10	-1.14308e-10	9.41967e-09	-1.24893e-10	1.93239e-10
2022-03-31 13:25:40	6506629	-1.30967e-10	-1.29225e-10	9.41967e-09	-1.27763e-10	1.8685e-10
2022-03-31 13:25:54	6520673	-1.40459e-10	-1.17256e-10	9.41967e-09	-1.30773e-10	1.84377e-10
2022-03-31 13:26:08	6534716	6.55856e-11	-1.18976e-10	9.41967e-09	-1.05865e-10	8.39629e-10
2022-03-31 13:26:22	6548759	4.24438e-09	-1.2471e-10	9.41967e-09	-5.17181e-11	1.77739e-09
2022-03-31 13:26:40	6566053	7.56849e-09	-1.0709e-10	9.41967e-09	-1.94574e-11	2.15734e-09
2022-03-31 13:26:51	6577887	9.32414e-09	-1.10448e-10	9.41967e-09	-1.09219e-11	2.09053e-09
2022-03-31 13:27:03	6589720	1.05521e-08	-1.12618e-10	9.41967e-09	-2.95624e-12	1.88014e-09
2022-03-31 13:27:16	6602593	1.13808e-08	-1.20963e-10	9.41967e-09	-5.91249e-12	1.62964e-09
2022-03-31 13:27:27	6613897	1.19419e-08	-1.07387e-10	9.41967e-09	-7.37448e-12	1.39511e-09
2022-03-31 13:27:39	6625200	1.22704e-08	-1.09128e-10	9.41967e-09	-1.25774e-11	1.22157e-09
2022-03-31 13:27:50	6636503	1.24619e-08	-1.10643e-10	9.41967e-09	-1.18464e-11	1.05456e-09
2022-03-31 13:28:01	6647807	1.26037e-08	-1.14502e-10	9.41967e-09	-1.86942e-11	9.37057e-10
2022-03-31 13:28:13	6659110	1.27387e-08	-1.09639e-10	9.41967e-09	-1.23409e-11	8.37029e-10
2022-03-31 13:28:24	6670413	1.22832e-08	-1.1397e-10	9.41967e-09	-1.70602e-11	7.6355e-10
2022-03-31 13:28:35	6681717	9.456e-09	-1.03373e-10	9.41967e-09	-6.19199e-11	5.6442e-10
2022-03-31 13:28:47	6693530	5.54168e-09	-1.11288e-10	9.41967e-09	-8.36348e-11	4.90736e-10
2022-03-31 13:28:59	6705363	3.82301e-09	-1.10387e-10	9.41967e-09	-1.01619e-10	4.38391e-10
2022-03-31 13:29:11	6717197	2.68653e-09	-1.12424e-10	9.41967e-09	-1.00125e-10	3.93111e-10
2022-03-31 13:29:23	6729030	1.93485e-09	-1.15741e-10	9.41967e-09	-1.19991e-10	3.63718e-10
2022-03-31 13:29:34	6740863	1.41345e-09	-1.18629e-10	9.41967e-09	-1.13186e-10	3.34132e-10
2022-03-31 13:29:46	6752697	1.01703e-09	-1.17799e-10	9.41967e-09	-1.21808e-10	3.13746e-10
2022-03-31 13:29:59	6765571	6.74862e-10	-1.2e-10	9.41967e-09	-1.27978e-10	2.87715e-10
2022-03-31 13:30:13	6779614	4.29891e-10	-1.18761e-10	9.41967e-09	-1.31601e-10	2.66968e-10
2022-03-31 13:30:27	6793657	2.88981e-10	-1.1955e-10	9.41967e-09	-1.29161e-10	3.03618e-10
2022-03-31 13:30:41	6807701	1.58368e-10	-1.17799e-10	9.41967e-09	-1.45791e-10	4.64768e-10
2022-03-31 13:30:55	6821744	3.80119e-11	-1.2515e-10	9.41967e-09	-1.4549e-10	5.74294e-10
2022-03-31 13:31:09	6835787	-1.28892e-11	-1.25099e-10	9.41967e-09	-1.46479e-10	6.15943e-10
2022-03-31 13:31:23	6849831	-4.84609e-11	-1.18362e-10	9.41967e-09	-1.49134e-10	6.34156e-10
2022-03-31 13:31:37	6863874	-7.55078e-11	-1.1225e-10	9.41967e-09	-1.50628e-10	6.25518e-10
2022-03-31 13:31:51	6877917	-9.42128e-11	-1.19847e-10	9.41967e-09	-1.53434e-10	6.05907e-10
2022-03-31 13:32:05	6891961	-1.01952e-10	-1.15403e-10	9.41967e-09	-1.57928e-10	5.77742e-10
2022-03-31 13:32:20	6906004	-1.11488e-10	-1.15331e-10	9.41967e-09	-1.45995e-10	5.53263e-10
2022-03-31 13:32:34	6920047	-1.14594e-10	-1.05247e-10	9.41967e-09	-1.54928e-10	5.29037e-10
2022-03-31 13:32:48	6934091	-1.18658e-10	-1.12004e-10	8.84242e-09	-1.43028e-10	5.13265e-10
2022-03-31 13:33:02	6948134	-1.22066e-10	-1.09148e-10	7.84388e-09	-1.52628e-10	4.78858e-10
2022-03-31 13:33:16	6962177	-1.13036e-10	-1.10868e-10	7.21278e-09	-1.46909e-10	4.61566e-10
2022-03-31 13:33:30	6976221	-1.26075e-10	-1.24371e-10	6.78232e-09	-1.56831e-10	4.4895e-10
2022-03-31 13:33:44	6990264	-1.17325e-10	-1.15751e-10	6.5312e-09	-1.4291e-10	4.3165e-10
2022-03-31 13:33:58	7004307	-1.18701e-10	-1.12127e-10	6.36525e-09	-1.64195e-10	4.2047e-10
2022-03-31 13:34:12	7018351	-1.28709e-10	-1.09332e-10	6.26998e-09	-1.57465e-10	4.02848e-10
2022-03-31 13:34:26	7032394	-1.23678e-10	-1.17185e-10	6.1753e-09	-1.52327e-10	3.87068e-10
2022-03-31 13:34:40	7046437	-1.31117e-10	-1.12004e-10	6.09822e-09	-1.52445e-10	3.89986e-10
2022-03-31 13:34:54	7060481	-1.29816e-10	-1.17164e-10	6.07001e-09	-1.52101e-10	3.64554e-10
2022-03-31 13:35:08	7074524	-1.27473e-10	-1.06783e-10	6.04963e-09	-1.64915e-10	3.64271e-10
2022-03-31 13:35:22	7088567	-1.32536e-10	-1.17748e-10	5.98865e-09	-1.50209e-10	3.51709e-10
2022-03-31 13:35:36	7102610	-1.27226e-10	-1.16888e-10	5.98503e-09	-1.56541e-10	3.49313e-10
2022-03-31 13:35:50	7116654	-1.26892e-10	-1.1999e-10	5.95384e-09	-1.50714e-10	3.45734e-10
2022-03-31 13:36:04	7130697	-1.39416e-10	-1.24535e-10	5.97161e-09	-1.58175e-10	3.36114e-10
2022-03-31 13:36:18	7144740	-1.30246e-10	-1.02933e-10	5.92674e-09	-1.45221e-10	3.31452e-10
2022-03-31 13:36:32	7158784	-1.35417e-10	-1.07203e-10	5.92008e-09	-1.49854e-10	3.30385e-10
2022-03-31 13:36:46	7172827	-1.25828e-10	-1.06783e-10	5.89246e-09	-1.67022e-10	3.25985e-10
2022-03-31 13:37:00	7186870	-1.28473e-10	-1.18966e-10	5.87957e-09	-1.59981e-10	3.17815e-10
2022-03-31 13:37:14	7200914	-1.3102e-10	-1.18547e-10	5.87433e-09	-1.44426e-10	3.20042e-10
2022-03-31 13:37:28	7214957	-1.28021e-10	-1.10264e-10	5.85762e-09	-1.55907e-10	3.12771e-10
2022-03-31 13:37:43	7229000	-1.36557e-10	-1.12475e-10	5.85334e-09	-1.48779e-10	3.00907e-10
2022-03-31 13:37:57	7243043	-1.24334e-10	-1.09117e-10	5.81938e-09	-1.49037e-10	3.03886e-10
2022-03-31 13:38:11	7257087	-1.422e-10	-1.15905e-10	5.82337e-09	-1.56444e-10	3.03088e-10
2022-03-31 13:38:25	7271130	-1.36976e-10	-1.16816e-10	5.81105e-09	-1.62625e-10	2.91286e-10
2022-03-31 13:38:39	7285173	-1.2485e-10	-1.19826e-10	5.80769e-09	-1.54219e-10	2.90188e-10
2022-03-31 13:38:53	7299217	-1.40588e-10	-1.16827e-10	5.8042e-09	-1.50467e-10	2.88675e-10
2022-03-31 13:39:07	7313260	-1.23022e-10	-1.18946e-10	5.77337e-09	-1.53176e-10	2.85611e-10
2022-03-31 13:39:21	7327303	-1.32353e-10	-1.16366e-10	5.75963e-09	-1.47887e-10	2.77357e-10
2022-03-31 13:39:35	7341347	-1.26957e-10	-1.15004e-10	5.76757e-09	-1.60497e-10	2.81058e-10
2022-03-31 13:39:49	7355390	-1.35084e-10	-1.12741e-10	5.77736e-09	-1.54627e-10	2.82694e-10
2022-03-31 13:40:03	7369433	-1.24861e-10	-1.06087e-10	5.7636e-09	-1.46812e-10	2.76481e-10
2022-03-31 13:40:17	7383477	-1.22689e-10	-1.15629e-10	5.77258e-09	-1.46113e-10	2.77664e-10
2022-03-31 13:40:31	7397520	-1.24796e-10	-1.0319e-10	5.77132e-09	-1.51908e-10	2.74278e-10
2022-03-31 13:40:45	7411563	-1.29107e-10	-1.10264e-10	5.75062e-09	-1.54025e-10	2.70515e-10
2022-03-31 13:40:59	7425607	-1.31902e-10	-1.13591e-10	5.74186e-09	-1.54799e-10	2.6901e-10
2022-03-31 13:41:13	7439650	-1.2772e-10	-1.1225e-10	5.76518e-09	-1.52531e-10	2.71184e-10
2022-03-31 13:41:27	7453693	-1.47855e-10	-1.18209e-10	5.732e-09	-1.55176e-10	2.68734e-10
2022-03-31 13:41:41	7467737	-1.31192e-10	-1.00087e-10	5.73358e-09	-1.53058e-10	2.68035e-10
2022-03-31 13:41:55	7481780	-1.26634e-10	-1.15588e-10	5.72847e-09	-1.58723e-10	2.66737e-10
2022-03-31 13:42:09	7495823	-1.32074e-10	-1.08288e-10	5.71194e-09	-1.59916e-10	2.61147e-10
2022-03-31 13:42:23	7509867	-1.18808e-10	-1.09751e-10	5.71699e-09	-1.59314e-10	2.52401e-10
2022-03-31 13:42:37	7523910	-1.36933e-10	-1.16079e-10	5.70662e-09	-1.60615e-10	2.53976e-10
2022-03-31 13:42:51	7537953	-1.47887e-10	-1.13499e-10	5.7214e-09	-1.50897e-10	2.59574e-10
2022-03-31 13:43:05	7551997	-1.42448e-10	-1.13714e-10	5.70471e-09	-1.60454e-10	2.55888e-10
2022-03-31 13:43:20	7566040	-1.3617e-10	-1.27484e-10	5.77853e-09	-1.59433e-10	2.53116e-10
2022-03-31 13:43:34	7580083	-1.27107e-10	-1.26276e-10	5.27431e-09	-1.52488e-10	2.65102e-10
2022-03-31 13:43:48	7594127	-1.43028e-10	-1.11574e-10	5.01043e-09	-1.5854e-10	2.64994e-10
2022-03-31 13:44:02	7608170	-1.33418e-10	-1.18209e-10	4.94039e-09	-1.71182e-10	2.58759e-10
2022-03-31 13:44:16	7622213	-1.24044e-10	-1.09169e-10	5.12441e-09	-1.57992e-10	2.55004e-10
2022-03-31 13:44:30	7636257	-1.41147e-10	-1.11421e-10	5.26718e-09	-1.58067e-10	2.59128e-10
2022-03-31 13:44:44	7650300	-1.30762e-10	-1.21168e-10	5.36292e-09	-1.59261e-10	2.62146e-10
2022-03-31 13:44:58	7664343	-1.30805e-10	-1.02513e-10	5.5812e-09	-1.55788e-10	2.64388e-10
2022-03-31 13:45:12	7678387	-1.34826e-10	-1.09087e-10	9.41967e-09	-1.48715e-10	2.88199e-10
2022-03-31 13:45:26	7692430	-1.39588e-10	-1.15751e-10	9.41967e-09	-1.4721e-10	2.57807e-10
2022-03-31 13:45:40	7706473	-1.37137e-10	-1.1567e-10	9.41967e-09	-1.44006e-10	2.16451e-10
2022-03-31 13:45:54	7720517	-1.37352e-10	-1.21464e-10	9.41967e-09	-1.49102e-10	2.12135e-10
2022-03-31 13:46:08	7734560	-1.57143e-10	-1.24075e-10	9.41967e-09	-1.39309e-10	2.09686e-10
2022-03-31 13:46:22	7748603	-1.49811e-10	-1.2945e-10	9.41967e-09	-1.37535e-10	1.86619e-10
2022-03-31 13:46:36	7762647	-1.45038e-10	-1.27587e-10	9.41967e-09	-1.34159e-10	1.74971e-10
2022-03-31 13:46:50	7776690	-1.41158e-10	-1.2641e-10	9.41967e-09	-1.19163e-10	1.72506e-10
2022-03-31 13:47:04	7790733	-1.31837e-10	-1.22856e-10	9.41967e-09	-1.18464e-10	4.89062e-10
2022-03-31 13:47:18	7804777	2.58628e-09	-1.11533e-10	9.41967e-09	-6.47256e-11	1.59351e-09
2022-03-31 13:47:36	7822070	6.58698e-09	-1.09169e-10	9.41967e-09	-4.08284e-11	2.09044e-09
2022-03-31 13:47:47	7833903	8.68642e-09	-1.18843e-10	9.41967e-09	-1.81997e-11	2.10955e-09
2022-03-31 13:47:59	7845737	9.98503e-09	-9.68829e-11	9.41967e-09	-1.34159e-11	1.95307e-09
2022-03-31 13:48:12	7858611	1.10906e-08	-1.1143e-10	9.41967e-09	-6.98748e-12	1.70061e-09
2022-03-31 13:48:23	7869914	1.16798e-08	-1.12404e-10	9.41967e-09	-2.80574e-12	1.47256e-09
2022-03-31 13:48:35	7881217	1.19936e-08	-1.05492e-10	9.41967e-09	-5.34274e-12	1.26479e-09
2022-03-31 13:48:46	7892520	1.23134e-08	-1.14922e-10	9.41967e-09	-6.99823e-12	1.09536e-09
2022-03-31 13:48:57	7903824	1.25613e-08	-1.2863e-10	9.41967e-09	-2.00487e-11	9.68907e-10
2022-03-31 13:49:09	7915127	1.26386e-08	-1.1009e-10	9.41967e-09	-1.06209e-11	8.65714e-10
2022-03-31 13:49:20	7926430	1.25621e-08	-1.1742e-10	9.41967e-09	-2.71544e-11	7.8255e-10
2022-03-31 13:49:31	7937733	1.09744e-08	-1.2173e-10	9.41967e-09	-6.26294e-11	5.93521e-10
2022-03-31 13:49:43	7949547	6.0718e-09	-1.1567e-10	9.41967e-09	-8.86443e-11	4.96779e-10
2022-03-31 13:49:55	7961381	4.10989e-09	-1.17051e-10	9.41967e-09	-9.7599e-11	4.40381e-10
2022-03-31 13:50:07	7973214	2.86797e-09	-1.16959e-10	9.41967e-09	-1.07231e-10	3.93802e-10
2022-03-31 13:50:19	7985047	2.05095e-09	-1.23276e-10	9.41967e-09	-1.15508e-10	3.63165e-10
2022-03-31 13:50:30	7996880	1.50057e-09	-1.16345e-10	9.41967e-09	-1.25871e-10	3.39369e-10
2022-03-31 13:50:42	8008714	1.0526e-09	-1.20594e-10	9.41967e-09	-1.24968e-10	3.15511e-10
2022-03-31 13:50:55	8021588	7.04209e-10	-1.17584e-10	9.41967e-09	-1.44318e-10	2.89266e-10
2022-03-31 13:51:09	8035631	4.58992e-10	-1.17973e-10	9.41967e-09	-1.2944e-10	2.69118e-10
2022-03-31 13:51:23	8049674	2.99913e-10	-1.38705e-10	9.41967e-09	-1.39255e-10	2.79338e-10
2022-03-31 13:51:37	8063718	1.63808e-10	-1.2345e-10	9.41967e-09	-1.46167e-10	4.31734e-10
2022-03-31 13:51:51	8077761	5.58354e-11	-1.27781e-10	9.41967e-09	-1.51467e-10	5.5486e-10
2022-03-31 13:52:05	8091804	-8.84723e-12	-1.18802e-10	9.41967e-09	-1.64313e-10	6.15175e-10
2022-03-31 13:52:19	8105848	-4.63324e-11	-1.23297e-10	9.41967e-09	-1.56638e-10	6.22286e-10
2022-03-31 13:52:33	8119891	-6.79506e-11	-1.1227e-10	9.41967e-09	-1.60755e-10	6.19237e-10
2022-03-31 13:52:47	8133934	-9.63091e-11	-1.10755e-10	9.41967e-09	-1.58347e-10	6.02805e-10
2022-03-31 13:53:01	8147978	-1.00985e-10	-1.24423e-10	9.41967e-09	-1.48919e-10	5.7388e-10
2022-03-31 13:53:16	8162021	-1.02533e-10	-1.16918e-10	9.41967e-09	-1.55831e-10	5.49999e-10
2022-03-31 13:53:30	8176064	-1.15626e-10	-1.16509e-10	9.41967e-09	-1.59884e-10	5.24806e-10
2022-03-31 13:53:44	8190107	-1.20421e-10	-1.10499e-10	9.06058e-09	-1.59465e-10	5.03706e-10
2022-03-31 13:53:58	8204151	-1.26387e-10	-1.27033e-10	7.96063e-09	-1.52241e-10	4.73391e-10
2022-03-31 13:54:12	8218194	-1.1912e-10	-1.24791e-10	7.28627e-09	-1.54326e-10	4.64584e-10
2022-03-31 13:54:26	8232237	-1.14648e-10	-1.17532e-10	6.83438e-09	-1.59992e-10	4.4392e-10
2022-03-31 13:54:40	8246281	-1.27978e-10	-1.2255e-10	6.57312e-09	-1.48317e-10	4.23856e-10
2022-03-31 13:54:54	8260324	-1.25721e-10	-1.14185e-10	6.3988e-09	-1.5768e-10	4.13567e-10
2022-03-31 13:55:08	8274367	-1.37019e-10	-1.24229e-10	6.26967e-09	-1.41061e-10	4.03677e-10
2022-03-31 13:55:22	8288411	-1.25957e-10	-1.14338e-10	6.19712e-09	-1.61765e-10	3.86846e-10
2022-03-31 13:55:36	8302454	-1.20969e-10	-1.1567e-10	6.12785e-09	-1.58218e-10	3.85202e-10
2022-03-31 13:55:50	8316497	-1.27462e-10	-1.12495e-10	6.0907e-09	-1.64614e-10	3.76549e-10
2022-03-31 13:56:04	8330541	-1.35632e-10	-1.24095e-10	6.04562e-09	-1.68925e-10	3.6447e-10
2022-03-31 13:56:18	8344584	-1.2456e-10	-1.13355e-10	5.99308e-09	-1.65603e-10	3.51516e-10
2022-03-31 13:56:32	8358627	-1.26946e-10	-1.14133e-10	5.9694e-09	-1.647e-10	3.40889e-10
2022-03-31 13:56:46	8372671	-1.34751e-10	-1.20655e-10	5.94146e-09	-1.57551e-10	3.37234e-10
2022-03-31 13:57:00	8386714	-1.39921e-10	-1.32122e-10	5.92998e-09	-1.56949e-10	3.29486e-10
2022-03-31 13:57:14	8400757	-1.32085e-10	-1.26655e-10	5.93523e-09	-1.68054e-10	3.34646e-10
2022-03-31 13:57:28	8414801	-1.39201e-10	-1.12516e-10	5.89909e-09	-1.62131e-10	3.29379e-10
2022-03-31 13:57:42	8428844	-1.27064e-10	-1.15372e-10	5.8731e-09	-1.60024e-10	3.10206e-10
2022-03-31 13:57:56	8442887	-1.40018e-10	-1.17584e-10	5.86894e-09	-1.65904e-10	3.13085e-10
2022-03-31 13:58:10	8456931	-1.33267e-10	-1.23399e-10	5.84099e-09	-1.55756e-10	3.04739e-10
2022-03-31 13:58:24	8470974	-1.33622e-10	-1.2173e-10	5.82734e-09	-1.62733e-10	2.99847e-10
2022-03-31 13:58:39	8485017	-1.35578e-10	-1.07387e-10	5.84285e-09	-1.57766e-10	2.95486e-10
2022-03-31 13:58:53	8499060	-1.37245e-10	-1.26205e-10	5.81589e-09	-1.5237e-10	2.94534e-10
2022-03-31 13:59:07	8513104	-1.32009e-10	-1.19181e-10	5.82158e-09	-1.62969e-10	2.8621e-10
2022-03-31 13:59:21	8527147	-1.39395e-10	-1.2213e-10	5.80133e-09	-1.7015e-10	2.90979e-10
2022-03-31 13:59:35	8541190	-1.43544e-10	-1.19703e-10	5.78663e-09	-1.62313e-10	2.82709e-10
2022-03-31 13:59:49	8555234	-1.47274e-10	-1.09158e-10	5.79376e-09	-1.61163e-10	2.98158e-10
2022-03-31 14:00:03	8569277	-1.43469e-10	-1.1697e-10	5.78566e-09	-1.63743e-10	2.77495e-10
2022-03-31 14:00:17	8583320	-1.43222e-10	-1.2388e-10	5.76612e-09	-1.57465e-10	2.74431e-10
2022-03-31 14:00:31	8597364	-1.37954e-10	-1.18351e-10	5.75932e-09	-1.62948e-10	2.71014e-10
2022-03-31 14:00:45	8611407	-1.49897e-10	-1.20185e-10	5.7582e-09	-1.65571e-10	2.75944e-10
2022-03-31 14:00:59	8625450	-1.40728e-10	-1.30412e-10	5.72213e-09	-1.59916e-10	2.64564e-10
2022-03-31 14:01:13	8639494	-1.45941e-10	-1.22733e-10	5.75213e-09	-1.65861e-10	2.68127e-10
2022-03-31 14:01:27	8653537	-1.45017e-10	-1.13469e-10	5.72355e-09	-1.6742e-10	2.65156e-10
2022-03-31 14:01:41	8667580	-1.43469e-10	-1.20563e-10	5.72937e-09	-1.67785e-10	2.59021e-10
2022-03-31 14:01:55	8681624	-1.40685e-10	-1.20799e-10	5.70921e-09	-1.62335e-10	2.61401e-10
2022-03-31 14:02:09	8695667	-1.43662e-10	-1.29736e-10	5.71759e-09	-1.57992e-10	2.52724e-10
2022-03-31 14:02:23	8709710	-1.40061e-10	-1.20952e-10	5.72468e-09	-1.61378e-10	2.52225e-10
2022-03-31 14:02:37	8723754	-1.46597e-10	-1.14687e-10	5.72033e-09	-1.6929e-10	2.60625e-10
2022-03-31 14:02:51	8737797	-1.47274e-10	-1.1826e-10	5.7207e-09	-1.64979e-10	2.51611e-10
2022-03-31 14:03:05	8751840	-1.38556e-10	-1.20819e-10	5.71304e-09	-1.67011e-10	2.48117e-10
2022-03-31 14:03:19	8765884	-1.44254e-10	-1.36627e-10	5.72412e-09	-1.65281e-10	2.47664e-10
2022-03-31 14:03:33	8779927	-1.34063e-10	-1.23511e-10	5.71548e-09	-1.75579e-10	2.42834e-10
2022-03-31 14:03:47	8793970	-1.49005e-10	-1.26491e-10	5.6902e-09	-1.6413e-10	2.46197e-10
2022-03-31 14:04:02	8808013	-1.36578e-10	-1.20123e-10	5.70851e-09	-1.59755e-10	2.42174e-10
2022-03-31 14:04:16	8822057	-1.44103e-10	-1.22826e-10	5.71307e-09	-1.71935e-10	2.3329e-10
2022-03-31 14:04:30	8836100	-1.39298e-10	-1.31406e-10	5.73081e-09	-1.65237e-10	2.56271e-10
2022-03-31 14:04:44	8850143	-1.43931e-10	-1.21341e-10	5.0519e-09	-1.65646e-10	2.59543e-10
2022-03-31 14:04:58	8864187	-1.45963e-10	-1.17349e-10	4.96563e-09	-1.6556e-10	2.56356e-10
2022-03-31 14:05:12	8878230	-1.38986e-10	-1.26e-10	5.03897e-09	-1.64636e-10	2.42542e-10
2022-03-31 14:05:26	8892273	-1.51284e-10	-1.28692e-10	5.23878e-09	-1.70956e-10	2.45521e-10
2022-03-31 14:05:40	8906317	-1.41889e-10	-1.21351e-10	5.32118e-09	-1.57766e-10	2.43095e-10
2022-03-31 14:05:54	8920360	-1.45511e-10	-1.33044e-10	5.40636e-09	-1.57035e-10	2.53584e-10
2022-03-31 14:06:08	8934403	-1.50618e-10	-1.23164e-10	9.41967e-09	-1.5997e-10	2.8664e-10
2022-03-31 14:06:22	8948447	-1.42405e-10	-1.2771e-10	9.41967e-09	-1.58745e-10	2.59596e-10
2022-03-31 14:06:36	8962490	-1.45823e-10	-1.21649e-10	9.41967e-09	-1.51048e-10	2.3018e-10
2022-03-31 14:06:50	8976533	-1.41383e-10	-1.25007e-10	9.41967e-09	-1.38642e-10	2.10377e-10
2022-03-31 14:07:04	8990577	-1.49704e-10	-1.316e-10	9.41967e-09	-1.47339e-10	2.00471e-10
2022-03-31 14:07:18	9004620	-1.3761e-10	-1.39801e-10	9.41967e-09	-1.39631e-10	1.90029e-10
2022-03-31 14:07:32	9018663	-1.53445e-10	-1.22069e-10	9.41967e-09	-1.45705e-10	1.80039e-10
2022-03-31 14:07:46	9032707	-1.43394e-10	-1.2341e-10	9.41967e-09	-1.36019e-10	1.7117e-10
2022-03-31 14:08:00	9046750	-1.52391e-10	-1.33381e-10	9.41967e-09	-1.32708e-10	2.57024e-10
2022-03-31 14:08:14	9060793	1.07621e-09	-1.31559e-10	9.41967e-09	-9.23746e-11	1.32004e-09
2022-03-31 14:08:32	9078087	5.75306e-09	-1.19498e-10	9.41967e-09	-5.36639e-11	1.98913e-09
2022-03-31 14:08:43	9089921	7.90631e-09	-1.101e-10	9.41967e-09	-3.12609e-11	2.1219e-09
2022-03-31 14:08:55	9101754	9.46082e-09	-1.19806e-10	9.41967e-09	-1.73612e-11	2.01284e-09
2022-03-31 14:09:08	9114628	1.07453e-08	-1.15649e-10	9.41967e-09	-9.95448e-12	1.77832e-09
2022-03-31 14:09:19	9125931	1.1399e-08	-1.13437e-10	9.41967e-09	-7.68623e-12	1.54344e-09
2022-03-31 14:09:31	9137234	1.18108e-08	-1.26778e-10	9.41967e-09	-1.91672e-11	1.33598e-09
2022-03-31 14:09:42	9148538	1.22046e-08	-1.18853e-10	9.41967e-09	-2.67137e-11	1.15364e-09
2022-03-31 14:09:53	9159841	1.238e-08	-1.2001e-10	9.41967e-09	-2.13817e-11	1.00504e-09
2022-03-31 14:10:05	9171144	1.24908e-08	-1.25539e-10	9.41967e-09	-2.62837e-11	8.93486e-10
2022-03-31 14:10:16	9182447	1.27327e-08	-1.2732e-10	9.41967e-09	-2.90464e-11	7.93036e-10
2022-03-31 14:10:27	9193750	1.11887e-08	-1.16786e-10	9.41967e-09	-3.95599e-11	6.50965e-10
2022-03-31 14:10:39	9205564	7.03437e-09	-1.2561e-10	9.41967e-09	-8.94721e-11	5.22771e-10
2022-03-31 14:10:51	9217398	4.57534e-09	-1.27136e-10	9.41967e-09	-9.84375e-11	4.56121e-10
2022-03-31 14:11:03	9229231	3.17144e-09	-1.2341e-10	9.41967e-09	-1.14831e-10	4.12216e-10
2022-03-31 14:11:15	9241064	2.22403e-09	-1.26665e-10	9.41967e-09	-1.18507e-10	3.72011e-10
2022-03-31 14:11:26	9252898	1.62121e-09	-1.30669e-10	9.41967e-09	-1.17002e-10	3.51631e-10
2022-03-31 14:11:38	9264731	1.1895e-09	-1.2817e-10	9.41967e-09	-1.38739e-10	3.17777e-10
2022-03-31 14:11:51	9277605	7.85845e-10	-1.37508e-10	9.41967e-09	-1.31246e-10	2.96484e-10
2022-03-31 14:12:05	9291648	5.20729e-10	-1.30893e-10	9.41967e-09	-1.38481e-10	2.80474e-10
2022-03-31 14:12:19	9305692	3.41989e-10	-1.35838e-10	9.41967e-09	-1.32504e-10	2.65539e-10
2022-03-31 14:12:33	9319735	2.06206e-10	-1.38122e-10	9.41967e-09	-1.32654e-10	3.82315e-10
2022-03-31 14:12:47	9333778	8.09043e-11	-1.28467e-10	9.41967e-09	-1.60669e-10	5.20015e-10
2022-03-31 14:13:01	9347822	1.31149e-12	-1.2772e-10	9.41967e-09	-1.43028e-10	5.96424e-10
2022-03-31 14:13:15	9361865	-5.22771e-11	-1.17226e-10	9.41967e-09	-1.59895e-10	6.26378e-10
2022-03-31 14:13:29	9375908	-7.50671e-11	-1.19407e-10	9.41967e-09	-1.49102e-10	6.23269e-10
2022-03-31 14:13:43	9389952	-9.48578e-11	-1.25386e-10	9.41967e-09	-1.65098e-10	6.0292e-10
2022-03-31 14:13:57	9403995	-9.90503e-11	-1.21638e-10	9.41967e-09	-1.58411e-10	5.80606e-10
2022-03-31 14:14:12	9418038	-1.18862e-10	-1.20563e-10	9.41967e-09	-1.66882e-10	5.53494e-10
2022-03-31 14:14:26	9432081	-1.25151e-10	-1.26307e-10	9.41967e-09	-1.64732e-10	5.3164e-10
2022-03-31 14:14:40	9446125	-1.22001e-10	-1.17789e-10	9.41967e-09	-1.57519e-10	5.08266e-10
2022-03-31 14:14:54	9460168	-1.36847e-10	-1.34047e-10	8.22921e-09	-1.55778e-10	4.83158e-10
2022-03-31 14:15:08	9474211	-1.30547e-10	-1.24392e-10	7.45333e-09	-1.66441e-10	4.64138e-10
2022-03-31 14:15:22	9488255	-1.33579e-10	-1.19304e-10	6.96757e-09	-1.53208e-10	4.47606e-10
2022-03-31 14:15:36	9502298	-1.38223e-10	-1.32102e-10	6.65065e-09	-1.60895e-10	4.21836e-10
2022-03-31 14:15:50	9516341	-1.41523e-10	-1.29809e-10	6.46275e-09	-1.61303e-10	4.10365e-10
2022-03-31 14:16:04	9530385	-1.41007e-10	-1.18771e-10	6.31151e-09	-1.66613e-10	3.9477e-10
2022-03-31 14:16:18	9544428	-1.29419e-10	-1.23768e-10	6.2109e-09	-1.63883e-10	3.84772e-10
2022-03-31 14:16:32	9558471	-1.34579e-10	-1.21034e-10	6.16133e-09	-1.7e-10	3.75819e-10
2022-03-31 14:16:46	9572515	-1.30547e-10	-1.29132e-10	6.08872e-09	-1.647e-10	3.73424e-10
2022-03-31 14:17:00	9586558	-1.37202e-10	-1.20799e-10	6.05425e-09	-1.7086e-10	3.66943e-10
2022-03-31 14:17:14	9600601	-1.528e-10	-1.19816e-10	6.01953e-09	-1.6513e-10	3.45189e-10
2022-03-31 14:17:28	9614645	-1.38653e-10	-1.31825e-10	5.97717e-09	-1.64883e-10	3.36544e-10
2022-03-31 14:17:42	9628688	-1.44544e-10	-1.29716e-10	5.95576e-09	-1.59766e-10	3.36958e-10
2022-03-31 14:17:56	9642731	-1.3589e-10	-1.1873e-10	5.93784e-09	-1.60368e-10	3.31038e-10
2022-03-31 14:18:10	9656774	-1.47565e-10	-1.2471e-10	5.89617e-09	-1.63829e-10	3.14859e-10
2022-03-31 14:18:24	9670818	-1.33299e-10	-1.22078e-10	5.88959e-09	-1.65807e-10	3.09745e-10
2022-03-31 14:18:38	9684861	-1.41996e-10	-1.24371e-10	5.89038e-09	-1.69161e-10	3.03733e-10
2022-03-31 14:18:52	9698904	-1.39448e-10	-1.38409e-10	5.88017e-09	-1.65195e-10	2.99939e-10
2022-03-31 14:19:06	9712948	-1.4993e-10	-1.24617e-10	5.89985e-09	-1.65968e-10	2.97298e-10
2022-03-31 14:19:20	9726991	-1.36825e-10	-1.2513e-10	5.85451e-09	-1.69312e-10	2.93743e-10
2022-03-31 14:19:35	9741034	-1.44006e-10	-1.22447e-10	5.85132e-09	-1.63528e-10	3.02789e-10
2022-03-31 14:19:49	9755078	-1.40609e-10	-1.28559e-10	5.84205e-09	-1.65678e-10	2.921e-10
2022-03-31 14:20:03	9769121	-1.55369e-10	-1.22048e-10	5.82838e-09	-1.7201e-10	2.82763e-10
2022-03-31 14:20:17	9783164	-1.31504e-10	-1.15485e-10	5.80606e-09	-1.59594e-10	2.89489e-10
2022-03-31 14:20:31	9797207	-1.45855e-10	-1.21608e-10	5.79466e-09	-1.61916e-10	2.77948e-10
2022-03-31 14:20:45	9811251	-1.43254e-10	-1.18372e-10	5.78918e-09	-1.70494e-10	2.73702e-10
2022-03-31 14:20:59	9825294	-1.46565e-10	-1.18771e-10	5.77568e-09	-1.64066e-10	2.70062e-10
2022-03-31 14:21:13	9839337	-1.47844e-10	-1.34723e-10	5.77252e-09	-1.62658e-10	2.69501e-10
2022-03-31 14:21:27	9853381	-1.42802e-10	-1.16376e-10	5.77093e-09	-1.66409e-10	2.69525e-10
2022-03-31 14:21:41	9867424	-1.53466e-10	-1.31098e-10	5.74991e-09	-1.73332e-10	2.64871e-10
2022-03-31 14:21:55	9881467	-1.43082e-10	-1.3071e-10	5.76325e-09	-1.68129e-10	2.5449e-10
2022-03-31 14:22:09	9895511	-1.51832e-10	-1.31917e-10	5.75452e-09	-1.64453e-10	2.49844e-10
2022-03-31 14:22:23	9909554	-1.56401e-10	-1.24515e-10	5.73432e-09	-1.61454e-10	2.54106e-10
2022-03-31 14:22:37	9923597	-1.5309e-10	-1.2818e-10	5.73352e-09	-1.69623e-10	2.48056e-10
2022-03-31 14:22:51	9937640	-1.43856e-10	-1.33208e-10	5.72623e-09	-1.73827e-10	2.48646e-10
2022-03-31 14:23:05	9951684	-1.47102e-10	-1.28805e-10	5.72259e-09	-1.74859e-10	2.49737e-10
2022-03-31 14:23:19	9965727	-1.54434e-10	-1.34323e-10	5.69627e-09	-1.70161e-10	2.45061e-10
2022-03-31 14:23:33	9979771	-1.50661e-10	-1.17993e-10	5.73062e-09	-1.71214e-10	2.44024e-10
2022-03-31 14:23:47	9993814	-1.55552e-10	-1.1143e-10	5.71871e-09	-1.64195e-10	2.52854e-10
2022-03-31 14:24:01	10007857	-1.47059e-10	-1.24638e-10	5.7161e-09	-1.6111e-10	2.4331e-10
2022-03-31 14:24:15	10021900	-1.53047e-10	-1.19396e-10	5.71727e-09	-1.73483e-10	2.47802e-10
2022-03-31 14:24:29	10035944	-1.50392e-10	-1.34989e-10	5.73611e-09	-1.72816e-10	2.32199e-10
2022-03-31 14:24:43	10049987	-1.53993e-10	-1.22918e-10	5.70662e-09	-1.65517e-10	2.36653e-10
2022-03-31 14:24:58	10064030	-1.52574e-10	-1.19929e-10	5.66917e-09	-1.74031e-10	2.40845e-10
2022-03-31 14:25:12	10078074	-1.44028e-10	-1.27975e-10	5.69005e-09	-1.65732e-10	2.44907e-10
2022-03-31 14:25:26	10092117	-1.52692e-10	-1.27147e-10	6.08182e-09	-1.53058e-10	2.41068e-10
2022-03-31 14:25:40	10106160	-1.51424e-10	-1.26184e-10	5.08504e-09	-1.6613e-10	2.48654e-10
2022-03-31 14:25:54	10120204	-1.46522e-10	-1.31231e-10	4.98468e-09	-1.67968e-10	2.5191e-10
2022-03-31 14:26:08	10134247	-1.52166e-10	-1.35193e-10	5.00626e-09	-1.72999e-10	2.42941e-10
2022-03-31 14:26:22	10148290	-1.40717e-10	-1.34077e-10	5.20726e-09	-1.70731e-10	2.45913e-10
2022-03-31 14:26:36	10162334	-1.40577e-10	-1.28057e-10	5.33582e-09	-1.71924e-10	2.34841e-10
2022-03-31 14:26:50	10176377	-1.55788e-10	-1.37353e-10	5.42222e-09	-1.70849e-10	2.31693e-10
2022-03-31 14:27:04	10190420	-1.46952e-10	-1.28354e-10	9.41967e-09	-1.77224e-10	2.61854e-10
2022-03-31 14:27:18	10204464	-1.60991e-10	-1.28365e-10	9.41967e-09	-1.71999e-10	2.49061e-10
2022-03-31 14:27:32	10218507	-1.46877e-10	-1.31395e-10	9.41967e-09	-1.46737e-10	2.25235e-10
2022-03-31 14:27:46	10232550	-1.50016e-10	-1.26307e-10	9.41967e-09	-1.54445e-10	2.04994e-10
2022-03-31 14:28:00	10246594	-1.52499e-10	-1.4493e-10	9.41967e-09	-1.54068e-10	1.86181e-10
2022-03-31 14:28:14	10260637	-1.57272e-10	-1.46927e-10	9.41967e-09	-1.5567e-10	1.83264e-10
2022-03-31 14:28:28	10274680	-1.6886e-10	-1.32316e-10	9.41967e-09	-1.53993e-10	1.56804e-10
2022-03-31 14:28:42	10288724	-1.60669e-10	-1.50212e-10	9.41967e-09	-1.52649e-10	1.58631e-10
2022-03-31 14:28:56	10302767	-1.7387e-10	-1.36289e-10	9.41967e-09	-1.48027e-10	1.65319e-10
2022-03-31 14:29:10	10316810	1.90349e-10	-1.3719e-10	9.41967e-09	-1.2758e-10	9.49864e-10
2022-03-31 14:29:24	10330853	4.33926e-09	-1.34508e-10	9.41967e-09	-6.92836e-11	1.78411e-09
2022-03-31 14:29:42	10348148	7.4861e-09	-1.27494e-10	9.41967e-09	-4.43759e-11	2.10791e-09
2022-03-31 14:29:53	10359981	9.15481e-09	-1.18178e-10	9.41967e-09	-3.56361e-11	2.02184e-09
2022-03-31 14:30:05	10371815	1.0406e-08	-1.19918e-10	9.41967e-09	-1.75977e-11	1.81984e-09
2022-03-31 14:30:18	10384688	1.127e-08	-1.26246e-10	9.41967e-09	-2.38219e-11	1.56597e-09
2022-03-31 14:30:29	10395992	1.16839e-08	-1.23061e-10	9.41967e-09	-2.92077e-11	1.34943e-09
2022-03-31 14:30:41	10407295	1.21005e-08	-1.23768e-10	9.41967e-09	-3.56791e-11	1.17769e-09
2022-03-31 14:30:52	10418598	1.23444e-08	-1.29419e-10	9.41967e-09	-3.01107e-11	1.02394e-09
2022-03-31 14:31:03	10429902	1.25291e-08	-1.3121e-10	9.41967e-09	-2.80144e-11	9.10171e-10
2022-03-31 14:31:15	10441205	1.26937e-08	-1.17072e-10	9.41967e-09	-3.47546e-11	8.01136e-10
2022-03-31 14:31:26	10452508	1.13936e-08	-1.22703e-10	9.41967e-09	-4.51714e-11	6.87499e-10
2022-03-31 14:31:38	10464322	7.3849e-09	-1.20021e-10	9.41967e-09	-8.94291e-11	5.2195e-10
2022-03-31 14:31:50	10476155	4.69706e-09	-1.29931e-10	9.41967e-09	-1.01383e-10	4.62917e-10
2022-03-31 14:32:01	10487988	3.26994e-09	-1.2261e-10	9.41967e-09	-1.24269e-10	4.09958e-10
2022-03-31 14:32:13	10499822	2.2904e-09	-1.2691e-10	9.41967e-09	-1.19066e-10	3.82108e-10
2022-03-31 14:32:25	10511655	1.64084e-09	-1.26931e-10	9.41967e-09	-1.37578e-10	3.46994e-10
2022-03-31 14:32:37	10523488	1.20021e-09	-1.39913e-10	9.41967e-09	-1.29902e-10	3.1909e-10
2022-03-31 14:32:50	10536362	7.88124e-10	-1.39483e-10	9.41967e-09	-1.37814e-10	2.8707e-10
2022-03-31 14:33:04	10550405	5.23739e-10	-1.30669e-10	9.41967e-09	-1.4219e-10	2.68181e-10
2022-03-31 14:33:18	10564448	3.44827e-10	-1.39555e-10	9.41967e-09	-1.39545e-10	2.58882e-10
2022-03-31 14:33:32	10578492	2.01551e-10	-1.39974e-10	9.41967e-09	-1.5123e-10	3.59947e-10
2022-03-31 14:33:46	10592535	7.84748e-11	-1.30095e-10	9.41967e-09	-1.64829e-10	5.14186e-10
2022-03-31 14:34:00	10606578	6.13824e-12	-1.26686e-10	9.41967e-09	-1.56326e-10	5.89782e-10
2022-03-31 14:34:14	10620622	-4.18926e-11	-1.30003e-10	9.41967e-09	-1.51392e-10	6.14261e-10
2022-03-31 14:34:28	10634665	-8.09796e-11	-1.3721e-10	9.41967e-09	-1.60196e-10	6.19061e-10
2022-03-31 14:34:42	10648708	-1.03425e-10	-1.2777e-10	9.41967e-09	-1.62281e-10	6.00901e-10
2022-03-31 14:34:56	10662752	-1.20055e-10	-1.26757e-10	9.41967e-09	-1.60895e-10	5.75508e-10
2022-03-31 14:35:10	10676795	-1.18196e-10	-1.28928e-10	9.41967e-09	-1.77428e-10	5.47081e-10
2022-03-31 14:35:24	10690838	-1.34686e-10	-1.2433e-10	9.41967e-09	-1.58207e-10	5.26165e-10
2022-03-31 14:35:38	10704882	-1.36772e-10	-1.31794e-10	9.41967e-09	-1.74945e-10	4.96188e-10
2022-03-31 14:35:52	10718925	-1.35729e-10	-1.37129e-10	8.27537e-09	-1.8262e-10	4.67762e-10
2022-03-31 14:36:06	10732968	-1.5381e-10	-1.3679e-10	7.46238e-09	-1.82255e-10	4.56551e-10
2022-03-31 14:36:21	10747012	-1.37019e-10	-1.31518e-10	6.98698e-09	-1.76826e-10	4.40265e-10
2022-03-31 14:36:35	10761055	-1.35697e-10	-1.33432e-10	6.65815e-09	-1.74579e-10	4.24532e-10
2022-03-31 14:36:49	10775098	-1.49134e-10	-1.33484e-10	6.45493e-09	-1.70107e-10	4.06249e-10
2022-03-31 14:37:03	10789142	-1.44748e-10	-1.26132e-10	6.32203e-09	-1.63819e-10	3.94785e-10
2022-03-31 14:37:17	10803185	-1.22463e-10	-1.15526e-10	6.18922e-09	-1.74009e-10	3.83597e-10
2022-03-31 14:37:31	10817228	-1.48521e-10	-1.30945e-10	6.13908e-09	-1.70569e-10	3.7168e-10
2022-03-31 14:37:45	10831272	-1.50618e-10	-1.1917e-10	6.09522e-09	-1.64775e-10	3.64363e-10
2022-03-31 14:37:59	10845315	-1.34858e-10	-1.34426e-10	6.05161e-09	-1.67129e-10	3.56899e-10
2022-03-31 14:38:13	10859358	-1.42555e-10	-1.23707e-10	6.00463e-09	-1.55272e-10	3.43308e-10
2022-03-31 14:38:27	10873402	-1.36019e-10	-1.07632e-10	5.96517e-09	-1.61131e-10	3.36581e-10
2022-03-31 14:38:41	10887445	-1.41405e-10	-1.1956e-10	5.94658e-09	-1.68151e-10	3.28657e-10
2022-03-31 14:38:55	10901488	-1.47231e-10	-1.33975e-10	5.92741e-09	-1.77847e-10	3.16579e-10
2022-03-31 14:39:09	10915532	-1.44071e-10	-1.28979e-10	5.89943e-09	-1.6915e-10	3.16625e-10
2022-03-31 14:39:23	10929575	-1.44264e-10	-1.24198e-10	5.88922e-09	-1.75869e-10	3.07695e-10
2022-03-31 14:39:37	10943618	-1.52864e-10	-1.23164e-10	5.89193e-09	-1.74106e-10	3.04992e-10
2022-03-31 14:39:51	10957662	-1.54004e-10	-1.31969e-10	5.85396e-09	-1.71494e-10	3.04178e-10
2022-03-31 14:40:05	10971705	-1.44544e-10	-1.17328e-10	5.85513e-09	-1.76708e-10	2.98826e-10
2022-03-31 14:40:19	10985748	-1.47145e-10	-1.29542e-10	5.83298e-09	-1.81706e-10	2.93374e-10
2022-03-31 14:40:33	10999792	-1.50532e-10	-1.39821e-10	5.80509e-09	-1.70741e-10	2.80344e-10
2022-03-31 14:40:47	11013835	-1.5638e-10	-1.31436e-10	5.80827e-09	-1.78438e-10	2.79238e-10
2022-03-31 14:41:01	11027878	-1.56025e-10	-1.3116e-10	5.77433e-09	-1.74719e-10	2.77749e-10
2022-03-31 14:41:15	11041922	-1.50381e-10	-1.33852e-10	5.77703e-09	-1.75461e-10	2.80605e-10
2022-03-31 14:41:29	11055965	-1.5151e-10	-1.23348e-10	5.78343e-09	-1.70731e-10	2.64979e-10
2022-03-31 14:41:44	11070008	-1.6112e-10	-1.26972e-10	5.76851e-09	-1.7115e-10	2.66799e-10
2022-03-31 14:41:58	11084052	-1.6914e-10	-1.28334e-10	5.76408e-09	-1.80932e-10	2.68235e-10
2022-03-31 14:42:12	11098095	-1.57713e-10	-1.23041e-10	5.75017e-09	-1.7603e-10	2.61055e-10
2022-03-31 14:42:26	11112138	-1.5323e-10	-1.23809e-10	5.75545e-09	-1.74966e-10	2.57477e-10
2022-03-31 14:42:40	11126182	-1.57025e-10	-1.27003e-10	5.74089e-09	-1.76041e-10	2.55619e-10
2022-03-31 14:42:54	11140225	-1.47092e-10	-1.2816e-10	5.74772e-09	-1.7516e-10	2.51764e-10
2022-03-31 14:43:08	11154268	-1.57508e-10	-1.37077e-10	5.72153e-09	-1.76622e-10	2.55972e-10
2022-03-31 14:43:22	11168312	-1.46156e-10	-1.30044e-10	5.71793e-09	-1.75504e-10	2.48447e-10
2022-03-31 14:43:36	11182355	-1.56702e-10	-1.32808e-10	5.72043e-09	-1.74515e-10	2.50336e-10
2022-03-31 14:43:50	11196398	-1.49285e-10	-1.30955e-10	5.73836e-09	-1.63528e-10	2.48631e-10
2022-03-31 14:44:04	11210442	-1.46672e-10	-1.3459e-10	5.70921e-09	-1.84061e-10	2.43356e-10
2022-03-31 14:44:18	11224485	-1.47887e-10	-1.30617e-10	5.71724e-09	-1.85372e-10	2.39931e-10
2022-03-31 14:44:32	11238528	-1.54746e-10	-1.34446e-10	5.71272e-09	-1.61819e-10	2.47794e-10
2022-03-31 14:44:46	11252572	-1.57616e-10	-1.30105e-10	5.68592e-09	-1.71053e-10	2.38926e-10
2022-03-31 14:45:00	11266615	-1.50327e-10	-1.3076e-10	5.6955e-09	-1.75751e-10	2.44331e-10
2022-03-31 14:45:14	11280658	-1.45425e-10	-1.23051e-10	5.70458e-09	-1.76665e-10	2.40031e-10
2022-03-31 14:45:28	11294702	-1.49349e-10	-1.24177e-10	5.6843e-09	-1.76643e-10	2.42473e-10
2022-03-31 14:45:42	11308745	-1.51134e-10	-1.27832e-10	5.67894e-09	-1.63561e-10	2.46689e-10
2022-03-31 14:45:56	11322788	-1.54111e-10	-1.2988e-10	5.67519e-09	-1.78524e-10	2.37789e-10
2022-03-31 14:46:10	11336832	-1.54047e-10	-1.26102e-10	5.6885e-09	-1.78406e-10	2.36837e-10
2022-03-31 14:46:24	11350875	-1.57648e-10	-1.23112e-10	6.25938e-09	-1.64227e-10	2.41406e-10
2022-03-31 14:46:38	11364918	-1.53746e-10	-1.15864e-10	5.12744e-09	-1.70827e-10	2.33382e-10
2022-03-31 14:46:52	11378962	-1.58411e-10	-1.20553e-10	4.97906e-09	-1.71472e-10	2.45583e-10
2022-03-31 14:47:07	11393005	-1.50338e-10	-1.33258e-10	4.99936e-09	-1.69989e-10	2.43103e-10
2022-03-31 14:47:21	11407048	-1.56347e-10	-1.35521e-10	5.18383e-09	-1.67785e-10	2.34587e-10
2022-03-31 14:47:35	11421092	-1.57928e-10	-1.26747e-10	5.29852e-09	-1.57347e-10	2.34649e-10
2022-03-31 14:47:49	11435135	-1.51725e-10	-1.21771e-10	5.38218e-09	-1.77277e-10	2.31094e-10
2022-03-31 14:48:03	11449178	-1.44028e-10	-1.29511e-10	8.75892e-09	-1.70967e-10	2.58199e-10
2022-03-31 14:48:17	11463221	-1.53692e-10	-1.32552e-10	9.41967e-09	-1.62281e-10	2.52432e-10
2022-03-31 14:48:31	11477265	-1.2342e-10	-1.30484e-10	9.41967e-09	-1.76471e-10	2.22371e-10
2022-03-31 14:48:45	11491308	-1.56068e-10	-1.4151e-10	9.41967e-09	-1.42727e-10	1.96747e-10
2022-03-31 14:48:59	11505351	-1.60164e-10	-1.40425e-10	9.41967e-09	-1.60174e-10	1.88124e-10
2022-03-31 14:49:13	11519395	-1.67151e-10	-1.44858e-10	9.41967e-09	-1.58863e-10	1.76975e-10
2022-03-31 14:49:27	11533438	-1.5811e-10	-1.48257e-10	9.41967e-09	-1.42523e-10	1.62033e-10
2022-03-31 14:49:41	11547481	-1.6097e-10	-1.44807e-10	9.41967e-09	-1.54541e-10	1.57494e-10
2022-03-31 14:49:55	11561525	-1.49532e-10	-1.48124e-10	9.41967e-09	-1.57541e-10	1.54254e-10
2022-03-31 14:50:09	11575568	4.28494e-11	-1.38644e-10	9.41967e-09	-1.34073e-10	8.42671e-10
2022-03-31 14:50:23	11589611	3.80021e-09	-1.44869e-10	9.41967e-09	-7.87758e-11	1.72531e-09
2022-03-31 14:50:40	11606905	7.13338e-09	-1.30781e-10	9.41967e-09	-4.99659e-11	2.08647e-09
2022-03-31 14:50:52	11618738	8.91746e-09	-1.4194e-10	9.41967e-09	-3.16264e-11	2.02834e-09
2022-03-31 14:51:04	11630572	1.02929e-08	-1.34027e-10	9.41967e-09	-1.60282e-11	1.83936e-09
2022-03-31 14:51:17	11643445	1.11968e-08	-1.31969e-10	9.41967e-09	-2.87562e-11	1.58214e-09
2022-03-31 14:51:28	11654748	1.16765e-08	-1.26369e-10	9.41967e-09	-3.10459e-11	1.36958e-09
2022-03-31 14:51:40	11666052	1.20192e-08	-1.1781e-10	9.41967e-09	-2.84014e-11	1.19333e-09
2022-03-31 14:51:51	11677355	1.2257e-08	-1.36627e-10	9.41967e-09	-2.77564e-11	1.03036e-09
2022-03-31 14:52:02	11688658	1.25063e-08	-1.35296e-10	9.41967e-09	-4.25484e-11	9.17329e-10
2022-03-31 14:52:13	11699962	1.27045e-08	-1.25846e-10	9.41967e-09	-4.08929e-11	7.99679e-10
2022-03-31 14:52:25	11711265	1.16006e-08	-1.29389e-10	9.41967e-09	-5.06431e-11	6.89895e-10
2022-03-31 14:52:37	11723079	8.40233e-09	-1.40405e-10	9.41967e-09	-1.21184e-10	3.90976e-10
2022-03-31 14:52:48	11734912	2.58639e-09	-1.25949e-10	9.41967e-09	-1.55122e-10	3.36321e-10
2022-03-31 14:53:00	11746745	1.86993e-09	-1.38869e-10	9.41967e-09	-1.47618e-10	3.19996e-10
2022-03-31 14:53:12	11758579	1.49126e-09	-1.29255e-10	9.41967e-09	-1.4936e-10	3.05092e-10
2022-03-31 14:53:24	11770412	1.28542e-09	-1.2857e-10	9.41967e-09	-1.68237e-10	2.96799e-10
2022-03-31 14:53:36	11782245	1.0756e-09	-1.38633e-10	9.41967e-09	-1.58938e-10	2.85665e-10
2022-03-31 14:53:49	11795119	8.61116e-10	-1.39452e-10	9.41967e-09	-1.61787e-10	2.82079e-10
2022-03-31 14:54:03	11809163	7.29708e-10	-1.33269e-10	9.41967e-09	-1.5553e-10	2.77833e-10
2022-03-31 14:54:17	11823206	5.94087e-10	-1.40353e-10	9.41967e-09	-1.52241e-10	2.58045e-10
2022-03-31 14:54:31	11837249	4.90253e-10	-1.40845e-10	9.41967e-09	-1.65678e-10	2.57001e-10
2022-03-31 14:54:45	11851293	3.86289e-10	-1.41142e-10	9.41967e-09	-1.57089e-10	2.41176e-10
2022-03-31 14:54:59	11865336	3.01107e-10	-1.29706e-10	9.41967e-09	-1.55186e-10	2.40984e-10
2022-03-31 14:55:13	11879379	2.30221e-10	-1.40384e-10	9.41967e-09	-1.53531e-10	2.38903e-10
2022-03-31 14:55:27	11893423	1.85533e-10	-1.40968e-10	9.41967e-09	-1.66173e-10	2.31032e-10
2022-03-31 14:55:41	11907466	1.38965e-10	-1.39933e-10	9.41967e-09	-1.6111e-10	2.274e-10
2022-03-31 14:55:55	11921509	1.05091e-10	-1.32143e-10	9.41967e-09	-1.64947e-10	2.28606e-10
2022-03-31 14:56:09	11935552	6.69508e-11	-1.37569e-10	9.41967e-09	-1.75009e-10	2.24889e-10
2022-03-31 14:56:23	11949596	4.01404e-11	-1.41265e-10	9.41967e-09	-1.74536e-10	2.277e-10
2022-03-31 14:56:37	11963639	1.11154e-11	-1.44408e-10	9.41967e-09	-1.67828e-10	2.20421e-10
2022-03-31 14:56:51	11977682	-6.12749e-12	-1.35603e-10	9.41967e-09	-1.73859e-10	2.08549e-10
2022-03-31 14:57:05	11991726	-3.04009e-11	-1.34641e-10	9.41967e-09	-1.68344e-10	2.189e-10
2022-03-31 14:57:19	12005769	-3.62059e-11	-1.45974e-10	9.41967e-09	-1.56122e-10	2.15906e-10
2022-03-31 14:57:33	12019812	-4.21936e-11	-1.33801e-10	9.41967e-09	-1.66936e-10	2.03719e-10
2022-03-31 14:57:47	12033856	-6.06299e-11	-1.47233e-10	9.41967e-09	-1.65108e-10	2.17933e-10
2022-03-31 14:58:01	12047899	-6.33819e-11	-1.30566e-10	9.41967e-09	-1.64259e-10	2.35777e-10
2022-03-31 14:58:15	12061942	-5.78026e-11	-1.35193e-10	9.41967e-09	-1.69279e-10	2.55434e-10
2022-03-31 14:58:29	12075986	-4.16561e-11	-1.36422e-10	9.41967e-09	-1.6599e-10	2.76344e-10
2022-03-31 14:58:44	12090029	-1.28462e-11	-1.4579e-10	9.41967e-09	-1.64055e-10	2.9802e-10
2022-03-31 14:58:58	12104072	-3.22499e-12	-1.41756e-10	9.41967e-09	-1.54821e-10	3.16226e-10
2022-03-31 14:59:12	12118115	1.08574e-11	-1.44449e-10	9.41967e-09	-1.58497e-10	3.17884e-10
2022-03-31 14:59:26	12132159	8.06248e-12	-1.44746e-10	9.41967e-09	-1.70763e-10	3.19658e-10
2022-03-31 14:59:40	12146202	1.23947e-11	-1.3077e-10	9.41967e-09	-1.73966e-10	3.20026e-10
2022-03-31 14:59:54	12160245	1.37062e-11	-1.42831e-10	9.41967e-09	-1.76149e-10	3.17884e-10
2022-03-31 15:00:08	12174289	-1.24699e-12	-1.25887e-10	9.41967e-09	-1.54187e-10	3.09706e-10
2022-03-31 15:00:22	12188332	-1.29537e-11	-1.42831e-10	9.41967e-09	-1.72494e-10	3.11273e-10
2022-03-31 15:00:36	12202375	-2.29082e-11	-1.42964e-10	9.41967e-09	-1.6484e-10	3.06727e-10
2022-03-31 15:00:50	12216419	-2.21127e-11	-1.54523e-10	9.41967e-09	-1.70967e-10	2.97406e-10
2022-03-31 15:01:04	12230462	-3.33034e-11	-1.40661e-10	9.41967e-09	-1.71225e-10	2.92199e-10
2022-03-31 15:01:18	12244505	-6.10169e-11	-1.40702e-10	9.41967e-09	-1.74536e-10	2.63236e-10
2022-03-31 15:01:32	12258549	-5.82111e-11	-1.39504e-10	9.41967e-09	-1.69559e-10	2.72781e-10
2022-03-31 15:01:46	12272592	-6.45536e-11	-1.48339e-10	9.41967e-09	-1.63453e-10	2.63919e-10
2022-03-31 15:02:00	12286635	-6.40161e-11	-1.43578e-10	9.41967e-09	-1.78105e-10	2.69694e-10
2022-03-31 15:02:14	12300679	-6.40699e-11	-1.43446e-10	9.41967e-09	-1.70462e-10	2.57584e-10
2022-03-31 15:02:28	12314722	-6.69616e-11	-1.34825e-10	9.41967e-09	-1.71881e-10	2.50796e-10
2022-03-31 15:02:42	12328765	-6.13824e-11	-1.4189e-10	9.41967e-09	-1.65345e-10	2.63282e-10
2022-03-31 15:02:56	12342809	-6.29196e-11	-1.37006e-10	9.41967e-09	-1.73042e-10	2.55726e-10
2022-03-31 15:03:10	12356852	-6.42956e-11	-1.45985e-10	9.41967e-09	-1.72913e-10	2.36852e-10
2022-03-31 15:03:24	12370895	-7.94316e-11	-1.33187e-10	9.41967e-09	-1.74343e-10	2.38649e-10
2022-03-31 15:03:38	12384939	-6.47256e-11	-1.46087e-10	9.41967e-09	-1.70354e-10	2.29059e-10
2022-03-31 15:03:52	12398982	-6.95738e-11	-1.41326e-10	9.41967e-09	-1.6914e-10	2.35555e-10
2022-03-31 15:04:07	12413025	-8.07001e-11	-1.29777e-10	9.41967e-09	-1.73407e-10	2.22931e-10

## Sheet: conc vector
index	Real time	ms	Ethylene mbar	Carbon monoxide mbar	Argon mbar	Ethylene oxide mbar	Carbon dioxide mbar	Corrected Et	Corrected CO	Corrected Ar	Corrected EtO	Corrected CO2	ĉ Et	ĉ CO	ĉ EtO	ĉ CO2
1	2022-03-31 11:37:28	14288	1.00447e-10	9.81524e-11	5.96178e-09	-8.33123e-12	5.03974e-10	6.50897e-11	1.96305e-13	5.93197e-09	-8.3229e-12	1.74879e-10	0.0109727	3.30927e-05	-0.00140306	0.0294808
2	2022-03-31 11:38:26	72696	5.96194e-11	7.30179e-11	6.52103e-09	8.50323e-12	4.90352e-10	3.86334e-11	1.46036e-13	6.48842e-09	8.49473e-12	1.70152e-10	0.0059542	2.25071e-05	0.00130921	0.026224
3	2022-03-31 11:38:53	99741	6.16189e-11	6.5841e-11	6.73541e-09	2.81649e-12	4.76055e-10	3.9929e-11	1.31682e-13	6.70173e-09	2.81367e-12	1.65191e-10	0.00595802	1.96489e-05	0.000419843	0.024649
4	2022-03-31 11:39:07	113784	5.06431e-11	6.38855e-11	9.41967e-09	2.23599e-12	5.26641e-10	3.28167e-11	1.27771e-13	9.37257e-09	2.23375e-12	1.82744e-10	0.00350136	1.36324e-05	0.000238329	0.0194978
5	2022-03-31 11:39:21	127827	5.53624e-11	6.31484e-11	9.41967e-09	-6.39624e-12	4.95029e-10	3.58748e-11	1.26297e-13	9.37257e-09	-6.38984e-12	1.71775e-10	0.00382764	1.34751e-05	-0.00068176	0.0183274
6	2022-03-31 11:39:35	141871	4.50854e-11	3.98977e-11	9.41967e-09	1.52757e-11	4.84371e-10	2.92153e-11	7.97954e-14	9.37257e-09	1.52604e-11	1.68077e-10	0.00311711	8.51371e-06	0.0016282	0.0179328
7	2022-03-31 11:39:49	155914	3.25079e-11	4.7003e-11	9.41967e-09	1.16744e-11	4.42876e-10	2.10651e-11	9.4006e-14	9.37257e-09	1.16627e-11	1.53678e-10	0.00224753	1.00299e-05	0.00124435	0.0163966
8	2022-03-31 11:40:03	169957	4.37094e-11	4.18123e-11	9.41967e-09	1.81459e-11	4.35643e-10	2.83237e-11	8.36246e-14	9.37257e-09	1.81278e-11	1.51168e-10	0.00302198	8.92227e-06	0.00193413	0.0161288
9	2022-03-31 11:40:18	184000	2.99709e-11	4.17201e-11	9.41967e-09	1.64582e-11	4.14043e-10	1.94211e-11	8.34402e-14	9.37257e-09	1.64417e-11	1.43673e-10	0.00207213	8.90259e-06	0.00175424	0.0153291
10	2022-03-31 11:40:32	198044	2.10054e-11	3.6601e-11	9.41967e-09	3.29487e-11	4.08844e-10	1.36115e-11	7.3202e-14	9.37257e-09	3.29158e-11	1.41869e-10	0.00145227	7.81024e-06	0.00351192	0.0151366
11	2022-03-31 11:40:46	212087	2.00057e-11	3.04685e-11	9.41967e-09	2.72297e-11	4.03055e-10	1.29637e-11	6.0937e-14	9.37257e-09	2.72025e-11	1.3986e-10	0.00138315	6.50163e-06	0.00290235	0.0149223
12	2022-03-31 11:41:00	226130	2.91002e-11	4.13413e-11	9.41967e-09	2.74124e-11	9.99386e-10	1.88569e-11	8.26826e-14	9.37257e-09	2.7385e-11	3.46787e-10	0.00201193	8.82176e-06	0.00292182	0.0370002
13	2022-03-31 11:41:17	243425	8.64093e-09	6.26672e-11	9.41967e-09	1.67463e-10	5.07589e-09	5.59932e-09	1.25334e-13	9.37257e-09	1.67296e-10	1.76133e-09	0.597416	1.33725e-05	0.0178495	0.187924
14	2022-03-31 11:41:30	256298	1.13036e-08	6.80831e-11	9.41967e-09	1.98788e-10	6.03155e-09	7.32473e-09	1.36166e-13	9.37257e-09	1.98589e-10	2.09295e-09	0.781507	1.45282e-05	0.0211883	0.223306
15	2022-03-31 11:41:39	265922	1.13036e-08	6.93117e-11	9.41967e-09	2.13999e-10	6.74033e-09	7.32473e-09	1.38623e-13	9.37257e-09	2.13785e-10	2.33889e-09	0.781507	1.47903e-05	0.0228096	0.249547
16	2022-03-31 11:41:49	275545	1.13036e-08	6.35374e-11	9.41967e-09	2.52613e-10	6.89534e-09	7.32473e-09	1.27075e-13	9.37257e-09	2.5236e-10	2.39268e-09	0.781507	1.35582e-05	0.0269254	0.255286
17	2022-03-31 11:41:59	285168	1.13036e-08	5.62377e-11	9.41967e-09	2.50764e-10	6.68219e-09	7.32473e-09	1.12475e-13	9.37257e-09	2.50513e-10	2.31872e-09	0.781507	1.20005e-05	0.0267283	0.247394
18	2022-03-31 11:42:08	294791	1.13036e-08	6.63734e-11	9.41967e-09	2.26942e-10	6.27649e-09	7.32473e-09	1.32747e-13	9.37257e-09	2.26715e-10	2.17794e-09	0.781507	1.41633e-05	0.0241892	0.232374
19	2022-03-31 11:42:18	304414	1.13036e-08	5.91249e-11	9.41967e-09	2.45121e-10	5.66524e-09	7.32473e-09	1.1825e-13	9.37257e-09	2.44876e-10	1.96584e-09	0.781507	1.26166e-05	0.0261269	0.209744
20	2022-03-31 11:42:28	314038	1.13036e-08	7.14515e-11	9.41967e-09	2.41734e-10	5.07274e-09	7.32473e-09	1.42903e-13	9.37257e-09	2.41492e-10	1.76024e-09	0.781507	1.52469e-05	0.0257658	0.187808
21	2022-03-31 11:42:37	323661	1.13036e-08	6.00053e-11	9.41967e-09	2.26383e-10	4.51446e-09	7.32473e-09	1.20011e-13	9.37257e-09	2.26157e-10	1.56652e-09	0.781507	1.28044e-05	0.0241296	0.167139
22	2022-03-31 11:42:47	333284	1.13036e-08	6.36604e-11	9.41967e-09	2.19084e-10	4.03045e-09	7.32473e-09	1.27321e-13	9.37257e-09	2.18865e-10	1.39857e-09	0.781507	1.35844e-05	0.0233516	0.149219
23	2022-03-31 11:42:56	342907	1.13036e-08	6.00668e-11	9.41967e-09	2.09646e-10	3.60065e-09	7.32473e-09	1.20134e-13	9.37257e-09	2.09436e-10	1.24943e-09	0.781507	1.28176e-05	0.0223457	0.133307
24	2022-03-31 11:43:06	352530	1.13036e-08	9.27262e-11	9.41967e-09	2.12376e-10	3.24313e-09	7.32473e-09	1.85452e-13	9.37257e-09	2.12164e-10	1.12537e-09	0.781507	1.97867e-05	0.0226366	0.12007
25	2022-03-31 11:43:16	362153	1.13036e-08	4.88049e-11	9.41967e-09	1.99928e-10	2.89686e-09	7.32473e-09	9.76098e-14	9.37257e-09	1.99728e-10	1.00521e-09	0.781507	1.04144e-05	0.0213098	0.10725
26	2022-03-31 11:43:25	371777	1.13036e-08	5.48863e-11	9.41967e-09	1.95176e-10	2.54745e-09	7.32473e-09	1.09773e-13	9.37257e-09	1.94981e-10	8.83965e-10	0.781507	1.17121e-05	0.0208033	0.094314
27	2022-03-31 11:43:35	381400	1.12549e-08	4.49144e-11	9.41967e-09	1.29548e-10	1.86846e-09	7.29318e-09	8.98288e-14	9.37257e-09	1.29418e-10	6.48356e-10	0.77814	9.58422e-06	0.0138082	0.0691759
28	2022-03-31 11:43:45	391023	7.35645e-09	4.88868e-11	9.41967e-09	9.9448e-11	1.60102e-09	4.76698e-09	9.77736e-14	9.37257e-09	9.93486e-11	5.55554e-10	0.50861	1.04319e-05	0.0105999	0.0592744
29	2022-03-31 11:43:54	400647	5.53883e-09	4.22525e-11	9.41967e-09	8.30973e-11	1.42004e-09	3.58916e-09	8.4505e-14	9.37257e-09	8.30142e-11	4.92754e-10	0.382943	9.0162e-06	0.00885714	0.052574
30	2022-03-31 11:44:04	410270	4.25227e-09	5.42209e-11	9.41967e-09	6.05439e-11	1.28591e-09	2.75547e-09	1.08442e-13	9.37257e-09	6.04834e-11	4.46211e-10	0.293993	1.15701e-05	0.00645323	0.0476081
31	2022-03-31 11:44:13	419893	3.27973e-09	4.55594e-11	9.41967e-09	5.78994e-11	1.15964e-09	2.12527e-09	9.11188e-14	9.37257e-09	5.78415e-11	4.02395e-10	0.226754	9.72186e-06	0.00617136	0.0429333
32	2022-03-31 11:44:23	429516	2.57734e-09	3.42463e-11	9.41967e-09	5.17504e-11	1.07948e-09	1.67012e-09	6.84926e-14	9.37257e-09	5.16986e-11	3.7458e-10	0.178192	7.30777e-06	0.00551595	0.0399655
33	2022-03-31 11:44:33	439139	2.04357e-09	3.34887e-11	9.41967e-09	3.44321e-11	9.86114e-10	1.32423e-09	6.69774e-14	9.37257e-09	3.43977e-11	3.42182e-10	0.141288	7.14611e-06	0.00367004	0.0365088
34	2022-03-31 11:44:42	448762	1.62576e-09	3.56285e-11	9.41967e-09	3.02719e-11	9.28829e-10	1.05349e-09	7.1257e-14	9.37257e-09	3.02416e-11	3.22304e-10	0.112402	7.60272e-06	0.00322661	0.034388
35	2022-03-31 11:44:52	458385	1.31006e-09	3.93551e-11	9.41967e-09	2.83477e-11	8.54136e-10	8.48919e-10	7.87102e-14	9.37257e-09	2.83194e-11	2.96385e-10	0.0905748	8.39793e-06	0.00302151	0.0316226
36	2022-03-31 11:45:02	468008	1.03754e-09	2.41926e-11	9.41967e-09	2.96592e-11	8.19286e-10	6.72326e-10	4.83852e-14	9.37257e-09	2.96295e-11	2.84292e-10	0.0717333	5.16243e-06	0.0031613	0.0303324
37	2022-03-31 11:45:12	478672	7.69817e-10	3.00999e-11	9.41967e-09	1.75224e-11	7.41871e-10	4.98841e-10	6.01998e-14	9.37257e-09	1.75049e-11	2.57429e-10	0.0532235	6.42298e-06	0.00186767	0.0274662
38	2022-03-31 11:45:24	490505	5.82885e-10	3.38266e-11	9.41967e-09	4.45049e-12	7.25643e-10	3.77709e-10	6.76532e-14	9.37257e-09	4.44604e-12	2.51798e-10	0.0402994	7.21821e-06	0.000474367	0.0268654
39	2022-03-31 11:45:36	502339	4.48424e-10	3.3591e-11	9.41967e-09	5.09549e-12	8.11643e-10	2.90579e-10	6.7182e-14	9.37257e-09	5.09039e-12	2.8164e-10	0.0310031	7.16794e-06	0.000543116	0.0300494
40	2022-03-31 11:45:48	514172	3.09986e-10	1.99232e-11	9.41967e-09	2.79499e-13	9.54164e-10	2.00871e-10	3.98464e-14	9.37257e-09	2.7922e-13	3.31095e-10	0.0214318	4.25138e-06	2.97911e-05	0.0353259
41	2022-03-31 11:46:00	526005	2.12967e-10	2.23497e-11	9.41967e-09	-5.49324e-12	1.03293e-09	1.38003e-10	4.46994e-14	9.37257e-09	-5.48775e-12	3.58427e-10	0.0147241	4.76917e-06	-0.000585511	0.0382421
42	2022-03-31 11:46:11	537839	1.51779e-10	3.60994e-11	9.41967e-09	-1.12229e-11	1.05128e-09	9.83528e-11	7.21988e-14	9.37257e-09	-1.12117e-11	3.64794e-10	0.0104937	7.7032e-06	-0.00119622	0.0389215
43	2022-03-31 11:46:23	549672	1.1424e-10	2.53085e-11	9.41967e-09	-1.29429e-11	1.05852e-09	7.40275e-11	5.0617e-14	9.37257e-09	-1.293e-11	3.67306e-10	0.00789831	5.40055e-06	-0.00137955	0.0391895
44	2022-03-31 11:46:35	561505	8.09688e-11	3.07551e-11	9.41967e-09	-1.91564e-11	1.04119e-09	5.24678e-11	6.15102e-14	9.37257e-09	-1.91372e-11	3.61293e-10	0.00559801	6.56279e-06	-0.00204183	0.0385479
45	2022-03-31 11:46:47	573339	5.87701e-11	2.86359e-11	9.41967e-09	-1.68667e-11	1.00721e-09	3.8083e-11	5.72718e-14	9.37257e-09	-1.68498e-11	3.49502e-10	0.00406324	6.11057e-06	-0.00179778	0.0372899
46	2022-03-31 11:46:59	585172	5.12559e-11	1.46711e-11	9.41967e-09	-2.22524e-11	9.63764e-10	3.32138e-11	2.93422e-14	9.37257e-09	-2.22301e-11	3.34426e-10	0.00354373	3.13065e-06	-0.00237183	0.0356814
47	2022-03-31 11:47:11	597005	3.84204e-11	1.55926e-11	9.41967e-09	-2.46067e-11	9.39921e-10	2.48964e-11	3.11852e-14	9.37257e-09	-2.45821e-11	3.26153e-10	0.00265631	3.32728e-06	-0.00262277	0.0347986
48	2022-03-31 11:47:22	608839	4.01941e-11	1.93192e-11	9.41967e-09	-2.29834e-11	9.027e-10	2.60458e-11	3.86384e-14	9.37257e-09	-2.29604e-11	3.13237e-10	0.00277894	4.1225e-06	-0.00244975	0.0334206
49	2022-03-31 11:47:34	620672	1.83287e-11	3.28949e-11	9.41967e-09	-2.68857e-11	8.62814e-10	1.1877e-11	6.57898e-14	9.37257e-09	-2.68588e-11	2.99396e-10	0.00126721	7.0194e-06	-0.00286568	0.0319439
50	2022-03-31 11:47:46	632505	1.77697e-11	1.14973e-11	9.41967e-09	-3.61414e-11	8.35064e-10	1.15148e-11	2.29946e-14	9.37257e-09	-3.61053e-11	2.89767e-10	0.00122856	2.45339e-06	-0.00385223	0.0309165
51	2022-03-31 11:47:58	644339	2.49399e-11	1.69132e-11	9.41967e-09	-2.47464e-11	8.02036e-10	1.61611e-11	3.38264e-14	9.37257e-09	-2.47217e-11	2.78306e-10	0.00172429	3.60908e-06	-0.00263766	0.0296937
52	2022-03-31 11:48:10	656172	1.77374e-11	6.24522e-12	9.12658e-09	-2.66277e-11	7.77221e-10	1.14938e-11	1.24904e-14	9.08095e-09	-2.66011e-11	2.69696e-10	0.00126571	1.37546e-06	-0.00292933	0.0296991
53	2022-03-31 11:48:22	668005	2.05217e-11	2.1807e-11	8.56242e-09	-2.90142e-11	7.64229e-10	1.32981e-11	4.3614e-14	8.51961e-09	-2.89852e-11	2.65187e-10	0.00156088	5.11925e-06	-0.00340217	0.0311267
54	2022-03-31 11:48:33	679839	1.14272e-11	1.62478e-11	8.18117e-09	-3.70766e-11	7.41793e-10	7.40483e-12	3.24956e-14	8.14026e-09	-3.70395e-11	2.57402e-10	0.000909654	3.99196e-06	-0.00455016	0.0316209
55	2022-03-31 11:48:45	691672	6.96598e-12	1.0279e-11	7.90745e-09	-3.90546e-11	6.87591e-10	4.51396e-12	2.0558e-14	7.86791e-09	-3.90155e-11	2.38594e-10	0.000573717	2.61289e-06	-0.00495882	0.030325
56	2022-03-31 11:48:57	703505	-7.19173e-12	5.14975e-12	7.68913e-09	-3.68294e-11	6.75183e-10	-4.66024e-12	1.02995e-14	7.65068e-09	-3.67926e-11	2.34289e-10	-0.000609127	1.34622e-06	-0.00480906	0.0306232
57	2022-03-31 11:49:09	715339	-1.34159e-11	1.02585e-11	7.54657e-09	-3.88181e-11	6.63988e-10	-8.6935e-12	2.0517e-14	7.50884e-09	-3.87793e-11	2.30404e-10	-0.00115777	2.73238e-06	-0.00516449	0.0306844
58	2022-03-31 11:49:21	727172	1.02124e-12	7.09498e-12	7.41713e-09	-4.06026e-11	6.52224e-10	6.61764e-13	1.419e-14	7.38004e-09	-4.0562e-11	2.26322e-10	8.96693e-05	1.92275e-06	-0.00549617	0.0306667
59	2022-03-31 11:49:33	739005	1.47274e-12	1.22856e-11	7.33947e-09	-4.32364e-11	6.31607e-10	9.54336e-13	2.45712e-14	7.30277e-09	-4.31932e-11	2.19168e-10	0.000130681	3.36464e-06	-0.00591463	0.0300116
60	2022-03-31 11:49:48	754089	-5.90174e-12	1.50909e-11	7.22958e-09	-3.68616e-11	6.12626e-10	-3.82433e-12	3.01818e-14	7.19343e-09	-3.68247e-11	2.12581e-10	-0.000531642	4.19574e-06	-0.00511922	0.0295521
61	2022-03-31 11:50:02	768133	-6.26724e-12	5.52856e-13	7.13166e-09	-4.33224e-11	5.95902e-10	-4.06117e-12	1.10571e-15	7.096e-09	-4.32791e-11	2.06778e-10	-0.000572318	1.55822e-07	-0.00609908	0.0291401
62	2022-03-31 11:50:16	782176	3.00999e-13	8.34403e-12	7.08513e-09	-4.43974e-11	5.79785e-10	1.95047e-13	1.66881e-14	7.0497e-09	-4.4353e-11	2.01185e-10	2.76675e-05	2.3672e-06	-0.00629147	0.0285381
63	2022-03-31 11:50:30	796219	5.64374e-12	-4.19761e-13	7.08277e-09	-3.84096e-11	5.60511e-10	3.65714e-12	-8.39522e-16	7.04736e-09	-3.83712e-11	1.94497e-10	0.000518938	-1.19126e-07	-0.00544476	0.0275986
64	2022-03-31 11:50:44	810263	-8.09473e-12	1.26337e-11	7.01172e-09	-4.58486e-11	5.50314e-10	-5.24539e-12	2.52674e-14	6.97666e-09	-4.58028e-11	1.90959e-10	-0.000751847	3.6217e-06	-0.00656514	0.0273711
65	2022-03-31 11:50:58	824306	-1.27064e-11	-3.99285e-13	6.94359e-09	-4.23119e-11	5.46084e-10	-8.23375e-12	-7.9857e-16	6.90887e-09	-4.22696e-11	1.89491e-10	-0.00119176	-1.15586e-07	-0.00611816	0.0274272
66	2022-03-31 11:51:12	838349	-9.26648e-12	-3.83928e-12	6.94598e-09	-3.46686e-11	5.29774e-10	-6.00468e-12	-7.67856e-15	6.91125e-09	-3.46339e-11	1.83832e-10	-0.000868827	-1.11102e-06	-0.00501124	0.0265989
67	2022-03-31 11:51:26	852393	-2.46174e-11	-1.03507e-11	6.86784e-09	-5.30726e-11	5.19976e-10	-1.59521e-11	-2.07014e-14	6.8335e-09	-5.30195e-11	1.80432e-10	-0.00233439	-3.0294e-06	-0.00775877	0.026404
68	2022-03-31 11:51:40	866436	-4.00974e-12	-5.68213e-12	6.84184e-09	-4.98154e-11	5.17335e-10	-2.59831e-12	-1.13643e-14	6.80763e-09	-4.97656e-11	1.79515e-10	-0.000381676	-1.66934e-06	-0.00731026	0.0263697
69	2022-03-31 11:51:54	880479	-1.57487e-11	3.07142e-13	6.8342e-09	-4.25699e-11	5.13811e-10	-1.02052e-11	6.14284e-16	6.80003e-09	-4.25273e-11	1.78292e-10	-0.00150075	9.03355e-08	-0.00625399	0.0262194
70	2022-03-31 11:52:08	894523	-1.34697e-11	-8.31331e-12	6.77188e-09	-5.39971e-11	5.00834e-10	-8.72837e-12	-1.66266e-14	6.73802e-09	-5.39431e-11	1.73789e-10	-0.00129539	-2.46758e-06	-0.00800578	0.0257924
71	2022-03-31 11:52:22	908566	-2.19622e-11	1.95547e-12	6.72308e-09	-4.38169e-11	4.85884e-10	-1.42315e-11	3.91094e-15	6.68946e-09	-4.37731e-11	1.68602e-10	-0.00212745	5.84642e-07	-0.00654359	0.0252041
72	2022-03-31 11:52:36	922609	-2.15644e-11	8.7945e-12	6.70339e-09	-5.29544e-11	4.84271e-10	-1.39737e-11	1.7589e-14	6.66987e-09	-5.29014e-11	1.68042e-10	-0.00209505	2.63708e-06	-0.0079314	0.0251942
73	2022-03-31 11:52:50	936653	-2.25642e-11	-1.09342e-11	6.70123e-09	-4.84609e-11	4.72093e-10	-1.46216e-11	-2.18684e-14	6.66772e-09	-4.84124e-11	1.63816e-10	-0.00219289	-3.27974e-06	-0.00726071	0.0245685
74	2022-03-31 11:53:04	950696	-2.36284e-11	-1.8019e-11	6.64242e-09	-5.79639e-11	4.68454e-10	-1.53112e-11	-3.6038e-14	6.60921e-09	-5.79059e-11	1.62554e-10	-0.00231665	-5.4527e-06	-0.0087614	0.024595
75	2022-03-31 11:53:18	964739	-1.43404e-11	-6.32712e-12	6.61247e-09	-5.52226e-11	4.61504e-10	-9.29258e-12	-1.26542e-14	6.57941e-09	-5.51674e-11	1.60142e-10	-0.00141237	-1.92331e-06	-0.00838485	0.0243399
76	2022-03-31 11:53:32	978783	-1.38674e-11	-1.48247e-11	6.60114e-09	-5.00411e-11	4.5282e-10	-8.98608e-12	-2.96494e-14	6.56813e-09	-4.99911e-11	1.57129e-10	-0.00136813	-4.51413e-06	-0.00761115	0.0239229
77	2022-03-31 11:53:46	992826	-2.37252e-11	-1.49885e-11	6.56555e-09	-5.92969e-11	4.49288e-10	-1.53739e-11	-2.9977e-14	6.53272e-09	-5.92376e-11	1.55903e-10	-0.00235337	-4.58875e-06	-0.00906783	0.0238649
78	2022-03-31 11:54:00	1006869	-2.61869e-11	-6.78784e-12	6.53765e-09	-5.09011e-11	4.40749e-10	-1.69691e-11	-1.35757e-14	6.50496e-09	-5.08502e-11	1.5294e-10	-0.00260864	-2.08697e-06	-0.00781714	0.0235113
79	2022-03-31 11:54:14	1020913	-2.78854e-11	-1.63399e-11	6.52577e-09	-5.16536e-11	4.37033e-10	-1.80697e-11	-3.26798e-14	6.49314e-09	-5.16019e-11	1.5165e-10	-0.0027829	-5.03297e-06	-0.00794715	0.0233555
80	2022-03-31 11:54:28	1034956	-2.24567e-11	-2.00666e-11	6.54582e-09	-6.69508e-11	4.32164e-10	-1.45519e-11	-4.01332e-14	6.51309e-09	-6.68838e-11	1.49961e-10	-0.00223426	-6.16193e-06	-0.0102691	0.0230245
81	2022-03-31 11:54:42	1048999	-2.29942e-11	-1.5439e-11	6.38298e-09	-4.91704e-11	4.28018e-10	-1.49002e-11	-3.0878e-14	6.35107e-09	-4.91212e-11	1.48522e-10	-0.0023461	-4.86186e-06	-0.00773433	0.0233854
82	2022-03-31 11:54:57	1063042	-3.23037e-11	-1.88483e-11	6.39479e-09	-5.66309e-11	4.32241e-10	-2.09328e-11	-3.76966e-14	6.36282e-09	-5.65743e-11	1.49988e-10	-0.00328986	-5.92452e-06	-0.00889139	0.0235725
83	2022-03-31 11:55:11	1077086	-4.26236e-11	-2.5585e-11	6.47156e-09	-6.28874e-11	4.24271e-10	-2.76201e-11	-5.117e-14	6.4392e-09	-6.28245e-11	1.47222e-10	-0.00428937	-7.94664e-06	-0.00975657	0.0228634
84	2022-03-31 11:55:25	1091129	-3.07234e-11	-2.66804e-11	6.44384e-09	-5.91034e-11	4.1908e-10	-1.99088e-11	-5.33608e-14	6.41162e-09	-5.90443e-11	1.45421e-10	-0.00310511	-8.32251e-06	-0.00920895	0.0226808
85	2022-03-31 11:55:39	1105172	-4.44404e-11	-1.2818e-11	6.45488e-09	-7.37341e-11	4.06188e-10	-2.87974e-11	-2.5636e-14	6.42261e-09	-7.36604e-11	1.40947e-10	-0.00448375	-3.99153e-06	-0.0114689	0.0219455
86	2022-03-31 11:55:53	1119216	-4.43651e-11	-2.07013e-11	6.4258e-09	-6.86708e-11	4.0896e-10	-2.87486e-11	-4.14026e-14	6.39367e-09	-6.86021e-11	1.41909e-10	-0.00449641	-6.47556e-06	-0.0107297	0.0221952
87	2022-03-31 11:56:07	1133259	-4.36879e-11	-2.4254e-11	6.38663e-09	-6.24144e-11	4.11931e-10	-2.83098e-11	-4.8508e-14	6.3547e-09	-6.2352e-11	1.4294e-10	-0.00445493	-7.63341e-06	-0.00981195	0.0224936
88	2022-03-31 11:56:21	1147303	-4.36019e-11	-1.7978e-11	6.34811e-09	-5.90174e-11	4.04529e-10	-2.8254e-11	-3.5956e-14	6.31637e-09	-5.89584e-11	1.40372e-10	-0.00447314	-5.69251e-06	-0.00933422	0.0222235
89	2022-03-31 11:56:35	1161346	-4.14734e-11	-2.48478e-11	6.30449e-09	-6.52954e-11	3.97841e-10	-2.68748e-11	-4.96956e-14	6.27297e-09	-6.52301e-11	1.38051e-10	-0.00428422	-7.92218e-06	-0.0103986	0.0220073
90	2022-03-31 11:56:49	1175389	-2.86379e-11	-1.28078e-11	6.29952e-09	-5.48894e-11	4.0069e-10	-1.85574e-11	-2.56156e-14	6.26802e-09	-5.48345e-11	1.39039e-10	-0.00296064	-4.08671e-06	-0.0087483	0.0221823
91	2022-03-31 11:57:03	1189432	-3.84956e-11	-1.59099e-11	6.29065e-09	-5.84369e-11	3.94255e-10	-2.49451e-11	-3.18198e-14	6.2592e-09	-5.83785e-11	1.36806e-10	-0.00398536	-5.08369e-06	-0.00932683	0.0218569
92	2022-03-31 11:57:17	1203476	-3.85816e-11	-2.95573e-11	6.27839e-09	-7.33578e-11	3.86016e-10	-2.50009e-11	-5.91146e-14	6.247e-09	-7.32844e-11	1.33948e-10	-0.00400206	-9.46288e-06	-0.0117311	0.0214419
93	2022-03-31 11:57:31	1217519	-4.34836e-11	5.57975e-12	6.25143e-09	-6.95093e-11	3.87483e-10	-2.81774e-11	1.11595e-14	6.22017e-09	-6.94398e-11	1.34457e-10	-0.00453	1.79408e-06	-0.0111636	0.0216162
94	2022-03-31 11:57:45	1231563	-4.27956e-11	-1.60226e-11	6.25103e-09	-7.46908e-11	3.83336e-10	-2.77315e-11	-3.20452e-14	6.21977e-09	-7.46161e-11	1.33018e-10	-0.00445861	-5.15215e-06	-0.0119966	0.0213862
95	2022-03-31 11:57:59	1245606	-5.05356e-11	-3.97134e-11	6.26744e-09	-7.40243e-11	3.81225e-10	-3.27471e-11	-7.94268e-14	6.2361e-09	-7.39503e-11	1.32285e-10	-0.00525121	-1.27366e-05	-0.0118584	0.0212128
96	2022-03-31 11:58:13	1259649	-5.29006e-11	-3.63451e-11	6.22695e-09	-7.32718e-11	3.66866e-10	-3.42796e-11	-7.26902e-14	6.19582e-09	-7.31985e-11	1.27303e-10	-0.0055327	-1.17321e-05	-0.0118142	0.0205465
97	2022-03-31 11:58:27	1273692	-5.89206e-11	-4.37063e-11	6.36423e-09	-8.52258e-11	3.81555e-10	-3.81805e-11	-8.74126e-14	6.33241e-09	-8.51406e-11	1.324e-10	-0.00602939	-1.3804e-05	-0.0134452	0.0209082
98	2022-03-31 11:58:41	1287736	-4.86114e-11	-3.54442e-11	5.46102e-09	-8.20976e-11	3.78983e-10	-3.15002e-11	-7.08884e-14	5.43371e-09	-8.20155e-11	1.31507e-10	-0.00579717	-1.3046e-05	-0.0150938	0.0242021
99	2022-03-31 11:58:55	1301779	-5.44809e-11	-4.42591e-11	5.35149e-09	-7.56691e-11	3.83697e-10	-3.53036e-11	-8.85182e-14	5.32473e-09	-7.55934e-11	1.33143e-10	-0.00663012	-1.6624e-05	-0.0141967	0.0250046
100	2022-03-31 11:59:09	1315823	-6.18231e-11	-2.48888e-11	5.35593e-09	-7.76148e-11	3.68041e-10	-4.00614e-11	-4.97776e-14	5.32915e-09	-7.75372e-11	1.2771e-10	-0.0075174	-9.34063e-06	-0.0145496	0.0239645
101	2022-03-31 11:59:23	1329866	-6.05116e-11	-3.9949e-11	5.59683e-09	-7.16916e-11	3.62551e-10	-3.92115e-11	-7.9898e-14	5.56885e-09	-7.16199e-11	1.25805e-10	-0.00704123	-1.43473e-05	-0.0128608	0.0225909
102	2022-03-31 11:59:37	1343909	-5.24921e-11	-4.53444e-11	5.6946e-09	-8.66126e-11	3.62827e-10	-3.40149e-11	-9.06888e-14	5.66613e-09	-8.6526e-11	1.25901e-10	-0.0060032	-1.60054e-05	-0.0152707	0.0222199
103	2022-03-31 11:59:51	1357953	-6.09739e-11	-3.93756e-11	5.77252e-09	-8.13343e-11	3.57782e-10	-3.95111e-11	-7.87512e-14	5.74366e-09	-8.1253e-11	1.2415e-10	-0.00687908	-1.3711e-05	-0.0141466	0.0216152
104	2022-03-31 12:00:05	1371996	-4.77621e-11	-4.06144e-11	9.41967e-09	-6.97996e-11	3.85993e-10	-3.09498e-11	-8.12288e-14	9.37257e-09	-6.97298e-11	1.3394e-10	-0.00330217	-8.66665e-06	-0.00743977	0.0142906
105	2022-03-31 12:00:20	1386039	-5.31049e-11	-4.54468e-11	9.41967e-09	-8.52043e-11	3.99738e-10	-3.4412e-11	-9.08936e-14	9.37257e-09	-8.51191e-11	1.38709e-10	-0.00367156	-9.69783e-06	-0.00908172	0.0147995
106	2022-03-31 12:00:34	1400083	-5.49969e-11	-4.76787e-11	9.41967e-09	-7.09283e-11	3.43139e-10	-3.5638e-11	-9.53574e-14	9.37257e-09	-7.08574e-11	1.19069e-10	-0.00380237	-1.01741e-05	-0.00756008	0.012704
107	2022-03-31 12:00:48	1414126	-6.17694e-11	-5.29513e-11	9.41967e-09	-6.78216e-11	3.2878e-10	-4.00266e-11	-1.05903e-13	9.37257e-09	-6.77538e-11	1.14087e-10	-0.00427061	-1.12992e-05	-0.00722894	0.0121724
108	2022-03-31 12:01:02	1428169	-6.90793e-11	-5.22653e-11	9.41967e-09	-6.27046e-11	3.03164e-10	-4.47634e-11	-1.04531e-13	9.37257e-09	-6.26419e-11	1.05198e-10	-0.004776	-1.11528e-05	-0.00668353	0.011224
109	2022-03-31 12:01:16	1442213	-7.11111e-11	-4.89891e-11	9.41967e-09	-6.69294e-11	2.87454e-10	-4.608e-11	-9.79782e-14	9.37257e-09	-6.68625e-11	9.97465e-11	-0.00491647	-1.04537e-05	-0.00713384	0.0106424
110	2022-03-31 12:01:30	1456256	-6.69078e-11	-5.60023e-11	9.41967e-09	-6.00386e-11	2.79876e-10	-4.33563e-11	-1.12005e-13	9.37257e-09	-5.99786e-11	9.7117e-11	-0.00462587	-1.19503e-05	-0.00639937	0.0103618
111	2022-03-31 12:01:44	1470299	-6.57683e-11	-5.9043e-11	9.41967e-09	-6.71981e-11	2.59926e-10	-4.26179e-11	-1.18086e-13	9.37257e-09	-6.71309e-11	9.01943e-11	-0.00454708	-1.25991e-05	-0.00716248	0.00962322
112	2022-03-31 12:01:58	1484342	-7.42931e-11	-5.44666e-11	9.41967e-09	-6.21349e-11	3.36605e-10	-4.81419e-11	-1.08933e-13	9.37257e-09	-6.20728e-11	1.16802e-10	-0.00513647	-1.16226e-05	-0.00662281	0.0124621
113	2022-03-31 12:02:12	1498386	1.9294e-09	-4.55491e-11	9.41967e-09	1.29859e-11	1.65183e-09	1.25025e-09	-9.10982e-14	9.37257e-09	1.29729e-11	5.73185e-10	0.133395	-9.71966e-06	0.00138414	0.0611556
114	2022-03-31 12:02:29	1515680	9.98671e-09	-4.98082e-11	9.41967e-09	5.55881e-11	2.59839e-09	6.47139e-09	-9.96164e-14	9.37257e-09	5.55325e-11	9.01641e-10	0.69046	-1.06285e-05	0.005925	0.0962
115	2022-03-31 12:02:41	1527513	1.13036e-08	-4.22832e-11	9.41967e-09	7.55508e-11	2.80321e-09	7.32473e-09	-8.45664e-14	9.37257e-09	7.54752e-11	9.72714e-10	0.781507	-9.02275e-06	0.00805278	0.103783
116	2022-03-31 12:02:53	1539347	1.13036e-08	-3.98261e-11	9.41967e-09	8.85691e-11	2.67527e-09	7.32473e-09	-7.96522e-14	9.37257e-09	8.84805e-11	9.28319e-10	0.781507	-8.49844e-06	0.00944037	0.0990463
117	2022-03-31 12:03:05	1551180	1.13036e-08	-3.94677e-11	9.41967e-09	9.72013e-11	2.42149e-09	7.32473e-09	-7.89354e-14	9.37257e-09	9.71041e-11	8.40257e-10	0.781507	-8.42196e-06	0.0103605	0.0896506
118	2022-03-31 12:03:17	1563013	1.13036e-08	-3.99694e-11	9.41967e-09	9.18908e-11	2.11517e-09	7.32473e-09	-7.99388e-14	9.37257e-09	9.17989e-11	7.33964e-10	0.781507	-8.52901e-06	0.00979442	0.0783098
119	2022-03-31 12:03:28	1574847	1.13036e-08	-4.24982e-11	9.41967e-09	8.36348e-11	1.84814e-09	7.32473e-09	-8.49964e-14	9.37257e-09	8.35512e-11	6.41305e-10	0.781507	-9.06863e-06	0.00891443	0.0684235
120	2022-03-31 12:03:40	1586680	1.13036e-08	-3.49118e-11	9.41967e-09	7.59916e-11	1.62114e-09	7.32473e-09	-6.98236e-14	9.37257e-09	7.59156e-11	5.62536e-10	0.781507	-7.44978e-06	0.00809976	0.0600193
121	2022-03-31 12:03:52	1598513	1.13036e-08	-3.23728e-11	9.41967e-09	6.84128e-11	1.44539e-09	7.32473e-09	-6.47456e-14	9.37257e-09	6.83444e-11	5.0155e-10	0.781507	-6.90799e-06	0.00729196	0.0535126
122	2022-03-31 12:04:04	1610347	1.13036e-08	-4.18737e-11	9.41967e-09	6.84558e-11	1.29082e-09	7.32473e-09	-8.37474e-14	9.37257e-09	6.83873e-11	4.47915e-10	0.781507	-8.93537e-06	0.00729654	0.0477899
123	2022-03-31 12:04:16	1622180	1.13036e-08	-5.48044e-11	9.41967e-09	6.56393e-11	1.16339e-09	7.32473e-09	-1.09609e-13	9.37257e-09	6.55737e-11	4.03696e-10	0.781507	-1.16946e-05	0.00699634	0.0430721
124	2022-03-31 12:04:28	1634013	1.13036e-08	-4.67061e-11	9.41967e-09	5.28039e-11	9.35486e-10	7.32473e-09	-9.34122e-14	9.37257e-09	5.27511e-11	3.24614e-10	0.781507	-9.96655e-06	0.00562824	0.0346344
125	2022-03-31 12:04:39	1645847	8.07535e-09	-5.12723e-11	9.41967e-09	2.83799e-12	7.47629e-10	5.23283e-09	-1.02545e-13	9.37257e-09	2.83515e-12	2.59427e-10	0.558313	-1.09409e-05	0.000302495	0.0276794
126	2022-03-31 12:04:51	1657680	5.36594e-09	-4.49349e-11	9.41967e-09	-1.82749e-11	6.62061e-10	3.47713e-09	-8.98698e-14	9.37257e-09	-1.82566e-11	2.29735e-10	0.37099	-9.5886e-06	-0.00194788	0.0245114
127	2022-03-31 12:05:03	1669513	3.80382e-09	-5.48966e-11	9.41967e-09	-4.48274e-11	5.91218e-10	2.46488e-09	-1.09793e-13	9.37257e-09	-4.47826e-11	2.05153e-10	0.262988	-1.17143e-05	-0.00477805	0.0218886
128	2022-03-31 12:05:15	1681347	2.72663e-09	-5.61558e-11	9.41967e-09	-4.05274e-11	5.30819e-10	1.76686e-09	-1.12312e-13	9.37257e-09	-4.04869e-11	1.84194e-10	0.188513	-1.1983e-05	-0.00431972	0.0196525
129	2022-03-31 12:05:27	1693180	2.00719e-09	-5.49477e-11	9.41967e-09	-5.51044e-11	4.89216e-10	1.30066e-09	-1.09895e-13	9.37257e-09	-5.50493e-11	1.69758e-10	0.138773	-1.17252e-05	-0.00587345	0.0181122
130	2022-03-31 12:05:39	1705013	1.4649e-09	-5.53266e-11	9.41967e-09	-5.89421e-11	4.56574e-10	9.49255e-10	-1.10653e-13	9.37257e-09	-5.88832e-11	1.58431e-10	0.10128	-1.18061e-05	-0.0062825	0.0169037
131	2022-03-31 12:05:50	1716847	1.06678e-09	-6.1152e-11	9.41967e-09	-4.39674e-11	4.37854e-10	6.91273e-10	-1.22304e-13	9.37257e-09	-4.39234e-11	1.51935e-10	0.0737549	-1.30491e-05	-0.00468638	0.0162106
132	2022-03-31 12:06:03	1729720	7.59712e-10	-6.50731e-11	9.41967e-09	-7.04231e-11	4.03193e-10	4.92293e-10	-1.30146e-13	9.37257e-09	-7.03527e-11	1.39908e-10	0.0525249	-1.38859e-05	-0.00750623	0.0149274
133	2022-03-31 12:06:17	1743763	5.13311e-10	-6.22372e-11	9.41967e-09	-6.49191e-11	3.73676e-10	3.32626e-10	-1.24474e-13	9.37257e-09	-6.48542e-11	1.29666e-10	0.0354892	-1.32807e-05	-0.00691957	0.0138346
134	2022-03-31 12:06:31	1757807	3.52169e-10	-6.11213e-11	9.41967e-09	-7.24226e-11	4.45932e-10	2.28206e-10	-1.22243e-13	9.37257e-09	-7.23502e-11	1.54738e-10	0.0243482	-1.30426e-05	-0.00771935	0.0165097
135	2022-03-31 12:06:45	1771850	2.24921e-10	-6.05787e-11	9.41967e-09	-6.97458e-11	6.18669e-10	1.45749e-10	-1.21157e-13	9.37257e-09	-6.96761e-11	2.14678e-10	0.0155506	-1.29268e-05	-0.00743404	0.0229049
136	2022-03-31 12:06:59	1785893	1.14777e-10	-6.61174e-11	9.41967e-09	-9.05256e-11	7.13661e-10	7.43755e-11	-1.32235e-13	9.37257e-09	-9.04351e-11	2.4764e-10	0.00793544	-1.41087e-05	-0.00964891	0.0264218
137	2022-03-31 12:07:13	1799937	4.41824e-11	-5.74151e-11	9.41967e-09	-7.36588e-11	7.47821e-10	2.86302e-11	-1.1483e-13	9.37257e-09	-7.35851e-11	2.59494e-10	0.00305468	-1.22517e-05	-0.00785112	0.0276865
138	2022-03-31 12:07:27	1813980	1.49639e-11	-5.51013e-11	9.41967e-09	-7.85393e-11	7.52736e-10	9.69661e-12	-1.10203e-13	9.37257e-09	-7.84608e-11	2.61199e-10	0.00103457	-1.1758e-05	-0.00837132	0.0278685
139	2022-03-31 12:07:42	1828023	-1.80707e-11	-5.9258e-11	9.41967e-09	-8.43658e-11	7.40821e-10	-1.17098e-11	-1.18516e-13	9.37257e-09	-8.42814e-11	2.57065e-10	-0.00124937	-1.2645e-05	-0.00899235	0.0274274
140	2022-03-31 12:07:56	1842067	-4.15486e-11	-5.9391e-11	9.41967e-09	-9.03213e-11	7.06665e-10	-2.69235e-11	-1.18782e-13	9.37257e-09	-9.0231e-11	2.45213e-10	-0.00287258	-1.26734e-05	-0.00962713	0.0261628
141	2022-03-31 12:08:10	1856110	-3.70874e-11	-5.51628e-11	9.41967e-09	-8.92248e-11	6.79299e-10	-2.40326e-11	-1.10326e-13	9.37257e-09	-8.91356e-11	2.35717e-10	-0.00256415	-1.17711e-05	-0.00951026	0.0251496
142	2022-03-31 12:08:24	1870153	-5.03636e-11	-6.30972e-11	9.41967e-09	-1.01952e-10	6.52992e-10	-3.26356e-11	-1.26194e-13	9.37257e-09	-1.0185e-10	2.26588e-10	-0.00348203	-1.34642e-05	-0.0108668	0.0241757
143	2022-03-31 12:08:38	1884197	-6.08986e-11	-5.74663e-11	9.41967e-09	-9.42666e-11	6.36199e-10	-3.94623e-11	-1.14933e-13	9.37257e-09	-9.41723e-11	2.20761e-10	-0.0042104	-1.22627e-05	-0.0100477	0.0235539
144	2022-03-31 12:08:52	1898240	-5.90174e-11	-5.23268e-11	9.20742e-09	-9.82978e-11	6.02521e-10	-3.82433e-11	-1.04654e-13	9.16138e-09	-9.81995e-11	2.09075e-10	-0.0041744	-1.14233e-05	-0.0107189	0.0228213
145	2022-03-31 12:09:06	1912283	-5.50614e-11	-5.23882e-11	8.19309e-09	-8.64728e-11	5.80752e-10	-3.56798e-11	-1.04776e-13	8.15212e-09	-8.63863e-11	2.01521e-10	-0.00437675	-1.28526e-05	-0.0105968	0.0247201
146	2022-03-31 12:09:20	1926327	-6.49406e-11	-6.89944e-11	7.5492e-09	-1.02963e-10	5.59237e-10	-4.20815e-11	-1.37989e-13	7.51145e-09	-1.0286e-10	1.94055e-10	-0.00560231	-1.83705e-05	-0.0136938	0.0258346
147	2022-03-31 12:09:34	1940370	-5.11376e-11	-5.55313e-11	7.15614e-09	-1.02361e-10	5.42306e-10	-3.31372e-11	-1.11063e-13	7.12036e-09	-1.02259e-10	1.8818e-10	-0.00465386	-1.55979e-05	-0.0143614	0.0264285
148	2022-03-31 12:09:48	1954413	-6.05869e-11	-5.97085e-11	6.91555e-09	-1.07661e-10	5.21013e-10	-3.92603e-11	-1.19417e-13	6.88097e-09	-1.07553e-10	1.80792e-10	-0.00570563	-1.73547e-05	-0.0156305	0.0262741
149	2022-03-31 12:10:02	1968457	-6.52094e-11	-5.51934e-11	6.63854e-09	-1.03726e-10	5.01924e-10	-4.22557e-11	-1.10387e-13	6.60535e-09	-1.03622e-10	1.74168e-10	-0.00639719	-1.67117e-05	-0.0156876	0.0263677
150	2022-03-31 12:10:16	1982500	-7.46586e-11	-6.48479e-11	6.55396e-09	-9.19553e-11	4.99951e-10	-4.83788e-11	-1.29696e-13	6.52119e-09	-9.18633e-11	1.73483e-10	-0.0074187	-1.98884e-05	-0.0140869	0.026603
151	2022-03-31 12:10:30	1996543	-8.00766e-11	-6.46534e-11	6.47958e-09	-9.93405e-11	4.78512e-10	-5.18896e-11	-1.29307e-13	6.44718e-09	-9.92412e-11	1.66044e-10	-0.00804842	-2.00563e-05	-0.015393	0.0257545
152	2022-03-31 12:10:44	2010587	-7.70451e-11	-6.99568e-11	6.41688e-09	-1.03339e-10	4.71409e-10	-4.99252e-11	-1.39914e-13	6.3848e-09	-1.03236e-10	1.63579e-10	-0.00781939	-2.19136e-05	-0.016169	0.0256201
153	2022-03-31 12:10:58	2024630	-7.88941e-11	-5.4528e-11	6.38153e-09	-1.02619e-10	4.51837e-10	-5.11234e-11	-1.09056e-13	6.34962e-09	-1.02516e-10	1.56787e-10	-0.0080514	-1.71752e-05	-0.0161453	0.0246924
154	2022-03-31 12:11:12	2038673	-7.48306e-11	-6.98441e-11	6.27709e-09	-1.01372e-10	4.48804e-10	-4.84902e-11	-1.39688e-13	6.2457e-09	-1.01271e-10	1.55735e-10	-0.00776377	-2.23655e-05	-0.0162144	0.0249347
155	2022-03-31 12:11:26	2052717	-6.54781e-11	-5.99542e-11	6.30533e-09	-1.14121e-10	4.36879e-10	-4.24298e-11	-1.19908e-13	6.2738e-09	-1.14007e-10	1.51597e-10	-0.00676301	-1.91126e-05	-0.0181719	0.0241635
156	2022-03-31 12:11:40	2066760	-6.93696e-11	-6.44794e-11	6.22767e-09	-9.80505e-11	4.34514e-10	-4.49515e-11	-1.28959e-13	6.19653e-09	-9.79524e-11	1.50776e-10	-0.0072543	-2.08114e-05	-0.0158076	0.0243324
157	2022-03-31 12:11:54	2080803	-7.68086e-11	-6.31894e-11	6.24596e-09	-1.12047e-10	4.29815e-10	-4.9772e-11	-1.26379e-13	6.21473e-09	-1.11935e-10	1.49146e-10	-0.00800871	-2.03354e-05	-0.0180112	0.0239988
158	2022-03-31 12:12:08	2094847	-8.16353e-11	-6.41517e-11	6.21031e-09	-9.62338e-11	4.17959e-10	-5.28997e-11	-1.28303e-13	6.17926e-09	-9.61376e-11	1.45032e-10	-0.00856085	-2.07636e-05	-0.0155581	0.0234707
159	2022-03-31 12:12:22	2108890	-7.09821e-11	-6.0589e-11	6.19569e-09	-1.07843e-10	4.08023e-10	-4.59964e-11	-1.21178e-13	6.16471e-09	-1.07735e-10	1.41584e-10	-0.00746124	-1.96567e-05	-0.0174761	0.0229668
160	2022-03-31 12:12:36	2122933	-8.20008e-11	-6.93936e-11	6.18702e-09	-9.60833e-11	4.04783e-10	-5.31365e-11	-1.38787e-13	6.15608e-09	-9.59872e-11	1.4046e-10	-0.00863154	-2.25447e-05	-0.0155923	0.0228164
161	2022-03-31 12:12:50	2136977	-8.33983e-11	-5.1559e-11	6.12027e-09	-1.07349e-10	3.97619e-10	-5.40421e-11	-1.03118e-13	6.08967e-09	-1.07242e-10	1.37974e-10	-0.00887439	-1.69333e-05	-0.0176104	0.022657
162	2022-03-31 12:13:05	2151020	-8.13343e-11	-6.29744e-11	6.1396e-09	-1.0034e-10	3.92827e-10	-5.27046e-11	-1.25949e-13	6.1089e-09	-1.0024e-10	1.36311e-10	-0.00862751	-2.06173e-05	-0.0164088	0.0223135
163	2022-03-31 12:13:19	2165063	-7.98831e-11	-6.15923e-11	6.07763e-09	-1.01125e-10	3.87314e-10	-5.17642e-11	-1.23185e-13	6.04724e-09	-1.01024e-10	1.34398e-10	-0.00855998	-2.03704e-05	-0.0167058	0.0222247
164	2022-03-31 12:13:33	2179107	-7.90016e-11	-6.58308e-11	6.07282e-09	-1.09187e-10	3.86446e-10	-5.1193e-11	-1.31662e-13	6.04246e-09	-1.09078e-10	1.34097e-10	-0.00847222	-2.17894e-05	-0.0180519	0.0221924
165	2022-03-31 12:13:47	2193150	-8.10118e-11	-6.50527e-11	6.05233e-09	-1.09155e-10	3.75289e-10	-5.24956e-11	-1.30105e-13	6.02207e-09	-1.09046e-10	1.30225e-10	-0.00871721	-2.16048e-05	-0.0181077	0.0216247
166	2022-03-31 12:14:01	2207193	-8.62148e-11	-6.1408e-11	6.04117e-09	-1.08671e-10	3.79113e-10	-5.58672e-11	-1.22816e-13	6.01096e-09	-1.08562e-10	1.31552e-10	-0.00929421	-2.0432e-05	-0.0180607	0.0218854
167	2022-03-31 12:14:15	2221237	-7.87113e-11	-6.83187e-11	6.04746e-09	-1.13896e-10	3.65891e-10	-5.10049e-11	-1.36637e-13	6.01722e-09	-1.13782e-10	1.26964e-10	-0.00847649	-2.27077e-05	-0.0189094	0.0211001
168	2022-03-31 12:14:29	2235280	-9.44171e-11	-7.09498e-11	6.05693e-09	-1.08144e-10	3.61153e-10	-6.11823e-11	-1.419e-13	6.02665e-09	-1.08036e-10	1.2532e-10	-0.010152	-2.35454e-05	-0.0179264	0.0207943
169	2022-03-31 12:14:43	2249323	-8.83648e-11	-6.99465e-11	6.02801e-09	-1.09402e-10	3.65829e-10	-5.72604e-11	-1.39893e-13	5.99787e-09	-1.09293e-10	1.26943e-10	-0.00954679	-2.33238e-05	-0.0182219	0.0211646
170	2022-03-31 12:14:57	2263367	-8.49786e-11	-6.09985e-11	5.97718e-09	-1.12401e-10	3.60477e-10	-5.50661e-11	-1.21997e-13	5.94729e-09	-1.12289e-10	1.25086e-10	-0.00925902	-2.0513e-05	-0.0188806	0.0210323
171	2022-03-31 12:15:11	2277410	-9.12996e-11	-6.34965e-11	6.01757e-09	-1.09359e-10	3.59249e-10	-5.91621e-11	-1.26993e-13	5.98748e-09	-1.0925e-10	1.24659e-10	-0.00988097	-2.12098e-05	-0.0182463	0.02082
172	2022-03-31 12:15:25	2291453	-8.01841e-11	-7.02946e-11	5.98694e-09	-1.06919e-10	3.48852e-10	-5.19593e-11	-1.40589e-13	5.95701e-09	-1.06812e-10	1.21052e-10	-0.00872239	-2.36007e-05	-0.0179305	0.0203209
173	2022-03-31 12:15:39	2305496	-8.81606e-11	-7.57003e-11	5.96349e-09	-1.13154e-10	3.53797e-10	-5.71281e-11	-1.51401e-13	5.93367e-09	-1.13041e-10	1.22768e-10	-0.00962778	-2.55155e-05	-0.0190507	0.02069
174	2022-03-31 12:15:53	2319540	-8.87948e-11	-7.33046e-11	5.94735e-09	-1.1568e-10	3.49244e-10	-5.7539e-11	-1.46609e-13	5.91761e-09	-1.15564e-10	1.21188e-10	-0.00972335	-2.47751e-05	-0.0195289	0.0204791
175	2022-03-31 12:16:07	2333583	-9.23961e-11	-6.28413e-11	5.93869e-09	-1.18067e-10	3.52315e-10	-5.98727e-11	-1.25683e-13	5.909e-09	-1.17949e-10	1.22253e-10	-0.0101325	-2.12697e-05	-0.0199609	0.0206894
176	2022-03-31 12:16:21	2347626	-9.22026e-11	-8.07784e-11	5.9358e-09	-1.09477e-10	3.40629e-10	-5.97473e-11	-1.61557e-13	5.90612e-09	-1.09368e-10	1.18198e-10	-0.0101162	-2.73541e-05	-0.0185177	0.0200128
177	2022-03-31 12:16:35	2361670	-8.45593e-11	-6.63836e-11	5.92924e-09	-1.07908e-10	3.33326e-10	-5.47944e-11	-1.32767e-13	5.89959e-09	-1.078e-10	1.15664e-10	-0.00928783	-2.25045e-05	-0.0182725	0.0196054
178	2022-03-31 12:16:49	2375713	-8.95796e-11	-7.05915e-11	5.93243e-09	-1.04124e-10	3.43961e-10	-5.80476e-11	-1.41183e-13	5.90277e-09	-1.0402e-10	1.19354e-10	-0.00983396	-2.39181e-05	-0.0176222	0.0202201
179	2022-03-31 12:17:03	2389757	-8.69458e-11	-7.06939e-11	5.92687e-09	-1.13089e-10	3.4006e-10	-5.63409e-11	-1.41388e-13	5.89724e-09	-1.12976e-10	1.18001e-10	-0.00955378	-2.39753e-05	-0.0191574	0.0200095
180	2022-03-31 12:17:17	2403800	-9.27186e-11	-7.77274e-11	5.93566e-09	-1.16615e-10	3.33487e-10	-6.00817e-11	-1.55455e-13	5.90598e-09	-1.16498e-10	1.1572e-10	-0.010173	-2.63216e-05	-0.0197255	0.0195937
181	2022-03-31 12:17:31	2417843	-9.25573e-11	-6.13977e-11	5.93727e-09	-1.14068e-10	3.4059e-10	-5.99771e-11	-1.22795e-13	5.90758e-09	-1.13954e-10	1.18185e-10	-0.0101526	-2.07861e-05	-0.0192894	0.0200056
182	2022-03-31 12:17:45	2431887	-9.42343e-11	-6.92401e-11	5.91719e-09	-1.07747e-10	3.31406e-10	-6.10638e-11	-1.3848e-13	5.8876e-09	-1.07639e-10	1.14998e-10	-0.0103716	-2.35206e-05	-0.0182824	0.0195322
183	2022-03-31 12:17:59	2445930	-8.60106e-11	-5.91966e-11	5.92904e-09	-1.04995e-10	3.29556e-10	-5.57349e-11	-1.18393e-13	5.89939e-09	-1.0489e-10	1.14356e-10	-0.00944756	-2.00687e-05	-0.0177798	0.0193843
184	2022-03-31 12:18:13	2459973	-9.53416e-11	-7.0786e-11	5.9431e-09	-1.15401e-10	3.22891e-10	-6.17814e-11	-1.41572e-13	5.91338e-09	-1.15286e-10	1.12043e-10	-0.0104477	-2.39409e-05	-0.0194957	0.0189474
185	2022-03-31 12:18:28	2474017	-9.06868e-11	-5.8572e-11	5.88723e-09	-1.14906e-10	3.31583e-10	-5.8765e-11	-1.17144e-13	5.85779e-09	-1.14791e-10	1.15059e-10	-0.0100319	-1.9998e-05	-0.0195963	0.0196421
186	2022-03-31 12:18:42	2488060	-8.89668e-11	-6.25034e-11	5.9031e-09	-1.07327e-10	3.20403e-10	-5.76505e-11	-1.25007e-13	5.87358e-09	-1.0722e-10	1.1118e-10	-0.00981521	-2.12829e-05	-0.0182546	0.0189288
187	2022-03-31 12:18:56	2502103	-9.09448e-11	-6.42849e-11	5.88671e-09	-1.19916e-10	3.26884e-10	-5.89322e-11	-1.2857e-13	5.85728e-09	-1.19796e-10	1.13429e-10	-0.0100614	-2.19504e-05	-0.0204525	0.0193654
188	2022-03-31 12:19:10	2516146	-9.01816e-11	-7.50041e-11	5.90047e-09	-1.02769e-10	3.22361e-10	-5.84377e-11	-1.50008e-13	5.87097e-09	-1.02666e-10	1.11859e-10	-0.00995367	-2.55508e-05	-0.0174871	0.019053
189	2022-03-31 12:19:24	2530190	-9.43633e-11	-7.83827e-11	6.09544e-09	-1.10875e-10	3.18767e-10	-6.11474e-11	-1.56765e-13	6.06496e-09	-1.10764e-10	1.10612e-10	-0.0100821	-2.58477e-05	-0.018263	0.0182379
190	2022-03-31 12:19:38	2544233	-8.51076e-11	-7.52601e-11	5.26309e-09	-1.08757e-10	3.29349e-10	-5.51497e-11	-1.5052e-13	5.23677e-09	-1.08648e-10	1.14284e-10	-0.0105312	-2.87429e-05	-0.0207472	0.0218234
191	2022-03-31 12:19:52	2558276	-9.06331e-11	-6.37525e-11	5.08827e-09	-1.19131e-10	3.26361e-10	-5.87302e-11	-1.27505e-13	5.06283e-09	-1.19012e-10	1.13247e-10	-0.0116003	-2.51845e-05	-0.023507	0.0223684
192	2022-03-31 12:20:06	2572320	-9.23208e-11	-7.67753e-11	5.09569e-09	-1.12455e-10	3.19604e-10	-5.98239e-11	-1.53551e-13	5.07021e-09	-1.12343e-10	1.10903e-10	-0.0117991	-3.02849e-05	-0.0221574	0.0218734
193	2022-03-31 12:20:20	2586363	-1.01189e-10	-8.3512e-11	5.29709e-09	-1.34224e-10	3.11381e-10	-6.55705e-11	-1.67024e-13	5.2706e-09	-1.3409e-10	1.08049e-10	-0.0124408	-3.16897e-05	-0.0254411	0.0205003
194	2022-03-31 12:20:34	2600406	-9.13856e-11	-7.21989e-11	5.44118e-09	-1.22184e-10	3.13754e-10	-5.92179e-11	-1.44398e-13	5.41397e-09	-1.22062e-10	1.08873e-10	-0.010938	-2.66713e-05	-0.0225457	0.0201096
195	2022-03-31 12:20:48	2614449	-9.68143e-11	-7.56389e-11	5.51009e-09	-1.22377e-10	3.09476e-10	-6.27357e-11	-1.51278e-13	5.48254e-09	-1.22255e-10	1.07388e-10	-0.0114428	-2.75927e-05	-0.0222989	0.0195873
196	2022-03-31 12:21:02	2628493	-9.45783e-11	-7.80858e-11	7.39968e-09	-1.22044e-10	3.29525e-10	-6.12867e-11	-1.56172e-13	7.36268e-09	-1.21922e-10	1.14345e-10	-0.00832397	-2.12112e-05	-0.0165594	0.0155304
197	2022-03-31 12:21:16	2642536	-9.36323e-11	-8.48941e-11	9.41967e-09	-1.12584e-10	3.41796e-10	-6.06737e-11	-1.69788e-13	9.37257e-09	-1.12471e-10	1.18603e-10	-0.00647354	-1.81154e-05	-0.0120001	0.0126543
198	2022-03-31 12:21:30	2656579	-9.31486e-11	-8.0461e-11	9.41967e-09	-1.11423e-10	3.06282e-10	-6.03603e-11	-1.60922e-13	9.37257e-09	-1.11312e-10	1.0628e-10	-0.0064401	-1.71695e-05	-0.0118763	0.0113395
199	2022-03-31 12:21:44	2670623	-1.01393e-10	-9.21325e-11	9.41967e-09	-1.10574e-10	2.86271e-10	-6.57027e-11	-1.84265e-13	9.37257e-09	-1.10463e-10	9.9336e-11	-0.0070101	-1.966e-05	-0.0117858	0.0105986
200	2022-03-31 12:21:58	2684666	-1.0048e-10	-8.83955e-11	9.41967e-09	-1.07661e-10	2.66791e-10	-6.5111e-11	-1.76791e-13	9.37257e-09	-1.07553e-10	9.25765e-11	-0.00694698	-1.88626e-05	-0.0114753	0.00987738
201	2022-03-31 12:22:12	2698709	-1.09252e-10	-9.28798e-11	9.41967e-09	-1.00082e-10	2.534e-10	-7.07953e-11	-1.8576e-13	9.37257e-09	-9.99819e-11	8.79298e-11	-0.00755345	-1.98195e-05	-0.0106675	0.00938161
202	2022-03-31 12:22:26	2712753	-9.96415e-11	-9.46305e-11	9.41967e-09	-9.35141e-11	2.29159e-10	-6.45677e-11	-1.89261e-13	9.37257e-09	-9.34206e-11	7.95182e-11	-0.006889	-2.01931e-05	-0.00996744	0.00848414
203	2022-03-31 12:22:40	2726796	-1.02662e-10	-9.07298e-11	9.41967e-09	-1.09402e-10	2.28629e-10	-6.6525e-11	-1.8146e-13	9.37257e-09	-1.09293e-10	7.93343e-11	-0.00709784	-1.93607e-05	-0.0116609	0.00846451
204	2022-03-31 12:22:54	2740839	-1.0866e-10	-9.33098e-11	9.41967e-09	-1.02017e-10	2.24275e-10	-7.04117e-11	-1.8662e-13	9.37257e-09	-1.01915e-10	7.78234e-11	-0.00751253	-1.99112e-05	-0.0108737	0.00830332
205	2022-03-31 12:23:08	2754883	2.95226e-10	-9.40879e-11	9.41967e-09	-6.28229e-11	1.03695e-09	1.91306e-10	-1.88176e-13	9.37257e-09	-6.27601e-11	3.59822e-10	0.0204113	-2.00773e-05	-0.00669614	0.0383909
206	2022-03-31 12:23:26	2772177	7.08176e-09	-7.8567e-11	9.41967e-09	2.66599e-12	2.12906e-09	4.58898e-09	-1.57134e-13	9.37257e-09	2.66332e-12	7.38784e-10	0.489618	-1.67653e-05	0.000284161	0.078824
207	2022-03-31 12:23:38	2784010	8.99457e-09	-7.8956e-11	9.41967e-09	1.35234e-11	2.46701e-09	5.82848e-09	-1.57912e-13	9.37257e-09	1.35099e-11	8.56052e-10	0.621866	-1.68483e-05	0.00144143	0.0913359
208	2022-03-31 12:23:49	2795843	1.06117e-08	-8.03177e-11	9.41967e-09	3.70336e-11	2.39939e-09	6.87638e-09	-1.60635e-13	9.37257e-09	3.69966e-11	8.32588e-10	0.733671	-1.71389e-05	0.00394732	0.0888324
209	2022-03-31 12:24:01	2807677	1.13036e-08	-9.42722e-11	9.41967e-09	4.45479e-11	2.18574e-09	7.32473e-09	-1.88544e-13	9.37257e-09	4.45034e-11	7.58452e-10	0.781507	-2.01166e-05	0.00474825	0.0809225
210	2022-03-31 12:24:13	2819510	1.13036e-08	-8.42593e-11	9.41967e-09	4.83319e-11	1.91658e-09	7.32473e-09	-1.68519e-13	9.37257e-09	4.82836e-11	6.65053e-10	0.781507	-1.798e-05	0.00515158	0.0709574
211	2022-03-31 12:24:25	2831343	1.13036e-08	-7.58436e-11	9.41967e-09	3.92804e-11	1.63699e-09	7.32473e-09	-1.51687e-13	9.37257e-09	3.92411e-11	5.68036e-10	0.781507	-1.61842e-05	0.0041868	0.0606062
212	2022-03-31 12:24:37	2843177	1.13036e-08	-8.12084e-11	9.41967e-09	3.22714e-11	1.41899e-09	7.32473e-09	-1.62417e-13	9.37257e-09	3.22391e-11	4.9239e-10	0.781507	-1.73289e-05	0.00343973	0.0525352
213	2022-03-31 12:24:49	2855010	1.13036e-08	-7.67549e-11	9.41967e-09	2.07474e-11	1.24359e-09	7.32473e-09	-1.5351e-13	9.37257e-09	2.07267e-11	4.31526e-10	0.781507	-1.63786e-05	0.00221142	0.0460413
214	2022-03-31 12:25:00	2866843	1.13036e-08	-8.43208e-11	9.41967e-09	1.69312e-11	1.10426e-09	7.32473e-09	-1.68642e-13	9.37257e-09	1.69143e-11	3.83178e-10	0.781507	-1.79931e-05	0.00180466	0.0408829
215	2022-03-31 12:25:12	2878677	1.13036e-08	-8.63274e-11	9.41967e-09	1.80062e-11	9.82714e-10	7.32473e-09	-1.72655e-13	9.37257e-09	1.79882e-11	3.41002e-10	0.781507	-1.84213e-05	0.00191924	0.0363829
216	2022-03-31 12:25:24	2890510	1.13036e-08	-8.3041e-11	9.41967e-09	1.97477e-11	8.76336e-10	7.32473e-09	-1.66082e-13	9.37257e-09	1.9728e-11	3.04089e-10	0.781507	-1.772e-05	0.00210486	0.0324445
217	2022-03-31 12:25:36	2902343	9.26235e-09	-8.53036e-11	9.41967e-09	-3.88289e-11	6.51111e-10	6.002e-09	-1.70607e-13	9.37257e-09	-3.87901e-11	2.25936e-10	0.64038	-1.82028e-05	-0.00413868	0.024106
218	2022-03-31 12:25:48	2914176	5.71445e-09	-8.76993e-11	9.41967e-09	-6.45429e-11	5.67e-10	3.70296e-09	-1.75399e-13	9.37257e-09	-6.44784e-11	1.96749e-10	0.395085	-1.8714e-05	-0.00687947	0.020992
219	2022-03-31 12:26:00	2926010	4.00319e-09	-8.44744e-11	9.41967e-09	-6.66606e-11	5.09917e-10	2.59407e-09	-1.68949e-13	9.37257e-09	-6.65939e-11	1.76941e-10	0.276772	-1.80259e-05	-0.00710519	0.0188786
220	2022-03-31 12:26:11	2937843	2.84432e-09	-9.58686e-11	9.41967e-09	-8.10548e-11	4.59769e-10	1.84312e-09	-1.91737e-13	9.37257e-09	-8.09737e-11	1.5954e-10	0.19665	-2.04573e-05	-0.00863944	0.017022
221	2022-03-31 12:26:23	2949676	2.05766e-09	-8.74844e-11	9.41967e-09	-6.65853e-11	4.16654e-10	1.33336e-09	-1.74969e-13	9.37257e-09	-6.65187e-11	1.44579e-10	0.142262	-1.86682e-05	-0.00709717	0.0154257
222	2022-03-31 12:26:35	2961510	1.50822e-09	-8.11265e-11	9.41967e-09	-8.22158e-11	3.92528e-10	9.77327e-10	-1.62253e-13	9.37257e-09	-8.21336e-11	1.36207e-10	0.104275	-1.73115e-05	-0.00876319	0.0145325
223	2022-03-31 12:26:47	2973343	1.08971e-09	-9.14055e-11	9.41967e-09	-9.49868e-11	3.73331e-10	7.06132e-10	-1.82811e-13	9.37257e-09	-9.48918e-11	1.29546e-10	0.0753403	-1.95049e-05	-0.0101244	0.0138218
224	2022-03-31 12:27:00	2986217	7.46844e-10	-8.93068e-11	9.41967e-09	-9.48901e-11	3.44959e-10	4.83955e-10	-1.78614e-13	9.37257e-09	-9.47952e-11	1.19701e-10	0.0516352	-1.90571e-05	-0.0101141	0.0127714
225	2022-03-31 12:27:14	3000260	5.04109e-10	-9.79886e-11	9.41967e-09	-1.02479e-10	3.14744e-10	3.26663e-10	-1.95977e-13	9.37257e-09	-1.02377e-10	1.09216e-10	0.034853	-2.09097e-05	-0.010923	0.0116527
226	2022-03-31 12:27:28	3014303	3.33969e-10	-9.56438e-11	9.41967e-09	-1.18206e-10	3.39684e-10	2.16412e-10	-1.91288e-13	9.37257e-09	-1.18088e-10	1.1787e-10	0.0230899	-2.04093e-05	-0.0125993	0.0125761
227	2022-03-31 12:27:42	3028347	1.94413e-10	-1.05626e-10	9.41967e-09	-1.15465e-10	5.17135e-10	1.2598e-10	-2.11252e-13	9.37257e-09	-1.1535e-10	1.79446e-10	0.0134413	-2.25394e-05	-0.0123071	0.0191458
228	2022-03-31 12:27:56	3042390	7.77868e-11	-1.06496e-10	9.41967e-09	-1.29365e-10	6.35385e-10	5.04058e-11	-2.12992e-13	9.37257e-09	-1.29236e-10	2.20479e-10	0.00537802	-2.2725e-05	-0.0137887	0.0235238
229	2022-03-31 12:28:10	3056433	1.98659e-11	-8.96958e-11	9.41967e-09	-1.18303e-10	6.82677e-10	1.28731e-11	-1.79392e-13	9.37257e-09	-1.18185e-10	2.36889e-10	0.00137349	-1.91401e-05	-0.0126096	0.0252747
230	2022-03-31 12:28:24	3070477	-3.12179e-11	-8.76277e-11	9.41967e-09	-1.34632e-10	6.89872e-10	-2.02292e-11	-1.75255e-13	9.37257e-09	-1.34497e-10	2.39386e-10	-0.00215834	-1.86988e-05	-0.0143501	0.0255411
231	2022-03-31 12:28:38	3084520	-4.75686e-11	-9.95038e-11	9.41967e-09	-1.31117e-10	6.82309e-10	-3.08245e-11	-1.99008e-13	9.37257e-09	-1.30986e-10	2.36761e-10	-0.00328879	-2.1233e-05	-0.0139754	0.0252611
232	2022-03-31 12:28:52	3098563	-6.99393e-11	-9.78038e-11	9.41967e-09	-1.28193e-10	6.51848e-10	-4.53207e-11	-1.95608e-13	9.37257e-09	-1.28065e-10	2.26191e-10	-0.00483546	-2.08702e-05	-0.0136638	0.0241333
233	2022-03-31 12:29:06	3112607	-7.28311e-11	-1.01356e-10	9.41967e-09	-1.26914e-10	6.35285e-10	-4.71946e-11	-2.02712e-13	9.37257e-09	-1.26787e-10	2.20444e-10	-0.00503539	-2.16282e-05	-0.0135275	0.0235201
234	2022-03-31 12:29:20	3126650	-8.53333e-11	-8.5232e-11	9.41967e-09	-1.31934e-10	6.00417e-10	-5.5296e-11	-1.70464e-13	9.37257e-09	-1.31802e-10	2.08345e-10	-0.00589977	-1.81875e-05	-0.0140625	0.0222292
235	2022-03-31 12:29:34	3140693	-8.14096e-11	-8.80168e-11	9.41967e-09	-1.13992e-10	5.92393e-10	-5.27534e-11	-1.76034e-13	9.37257e-09	-1.13878e-10	2.0556e-10	-0.00562849	-1.87818e-05	-0.0121501	0.0219321
236	2022-03-31 12:29:48	3154736	-9.24928e-11	-9.51219e-11	9.12017e-09	-1.29225e-10	5.65188e-10	-5.99353e-11	-1.90244e-13	9.07457e-09	-1.29096e-10	1.9612e-10	-0.00660476	-2.09645e-05	-0.0142261	0.0216121
237	2022-03-31 12:30:02	3168780	-9.42021e-11	-9.09141e-11	8.06734e-09	-1.26473e-10	5.31863e-10	-6.1043e-11	-1.81828e-13	8.027e-09	-1.26347e-10	1.84556e-10	-0.0076047	-2.26521e-05	-0.0157402	0.022992
238	2022-03-31 12:30:16	3182823	-9.65563e-11	-8.93579e-11	7.37338e-09	-1.28129e-10	5.13526e-10	-6.25685e-11	-1.78716e-13	7.33651e-09	-1.28001e-10	1.78194e-10	-0.00852837	-2.43598e-05	-0.0174471	0.0242886
239	2022-03-31 12:30:30	3196866	-8.47851e-11	-8.5017e-11	6.97895e-09	-1.2758e-10	5.06416e-10	-5.49407e-11	-1.70034e-13	6.94406e-09	-1.27452e-10	1.75726e-10	-0.00791191	-2.44863e-05	-0.0183542	0.025306
240	2022-03-31 12:30:44	3210910	-8.75908e-11	-8.7167e-11	6.7114e-09	-1.20722e-10	4.79656e-10	-5.67588e-11	-1.74334e-13	6.67784e-09	-1.20601e-10	1.66441e-10	-0.00849958	-2.61063e-05	-0.0180599	0.0249243
241	2022-03-31 12:30:58	3224953	-9.48148e-11	-9.11598e-11	6.52579e-09	-1.32192e-10	4.69644e-10	-6.144e-11	-1.8232e-13	6.49316e-09	-1.3206e-10	1.62966e-10	-0.00946226	-2.80787e-05	-0.0203383	0.0250982
242	2022-03-31 12:31:12	3238996	-9.84698e-11	-8.68906e-11	6.39747e-09	-1.27086e-10	4.55499e-10	-6.38084e-11	-1.73781e-13	6.36548e-09	-1.26959e-10	1.58058e-10	-0.0100241	-2.73006e-05	-0.0199449	0.0248305
243	2022-03-31 12:31:27	3253039	-9.46428e-11	-8.9276e-11	6.3027e-09	-1.19969e-10	4.43621e-10	-6.13285e-11	-1.78552e-13	6.27119e-09	-1.19849e-10	1.53936e-10	-0.00977941	-2.84718e-05	-0.0191111	0.0245466
244	2022-03-31 12:31:41	3267083	-8.91711e-11	-8.36144e-11	6.30337e-09	-1.31321e-10	4.2854e-10	-5.77829e-11	-1.67229e-13	6.27185e-09	-1.3119e-10	1.48703e-10	-0.00921305	-2.66634e-05	-0.0209172	0.0237096
245	2022-03-31 12:31:55	3281126	-8.89346e-11	-7.82906e-11	6.2272e-09	-1.2356e-10	4.30022e-10	-5.76296e-11	-1.56581e-13	6.19606e-09	-1.23436e-10	1.49218e-10	-0.009301	-2.52711e-05	-0.0199218	0.0240826
246	2022-03-31 12:32:09	3295169	-1.03758e-10	-8.77096e-11	6.17502e-09	-1.28709e-10	4.05934e-10	-6.72352e-11	-1.75419e-13	6.14414e-09	-1.2858e-10	1.40859e-10	-0.010943	-2.85506e-05	-0.0209273	0.0229257
247	2022-03-31 12:32:23	3309213	-1.04188e-10	-8.04201e-11	6.11905e-09	-1.34675e-10	3.98386e-10	-6.75138e-11	-1.6084e-13	6.08845e-09	-1.3454e-10	1.3824e-10	-0.0110888	-2.64172e-05	-0.0220976	0.0227053
248	2022-03-31 12:32:37	3323256	-9.95018e-11	-1.02912e-10	6.10495e-09	-1.45114e-10	3.91191e-10	-6.44772e-11	-2.05824e-13	6.07443e-09	-1.44969e-10	1.35743e-10	-0.0106145	-3.38837e-05	-0.0238654	0.0223467
249	2022-03-31 12:32:51	3337299	-1.02382e-10	-8.8631e-11	6.08006e-09	-1.29763e-10	3.89825e-10	-6.63435e-11	-1.77262e-13	6.04966e-09	-1.29633e-10	1.35269e-10	-0.0109665	-2.93012e-05	-0.0214282	0.0223598
250	2022-03-31 12:33:05	3351343	-1.05016e-10	-9.43848e-11	6.04985e-09	-1.21657e-10	3.73224e-10	-6.80504e-11	-1.8877e-13	6.0196e-09	-1.21535e-10	1.29509e-10	-0.0113048	-3.13592e-05	-0.0201899	0.0215145
251	2022-03-31 12:33:19	3365386	-1.14175e-10	-9.28287e-11	6.03273e-09	-1.37406e-10	3.74614e-10	-7.39854e-11	-1.85657e-13	6.00257e-09	-1.37269e-10	1.29991e-10	-0.0123256	-3.09297e-05	-0.0228683	0.0216559
252	2022-03-31 12:33:33	3379429	-1.1396e-10	-7.74715e-11	6.00832e-09	-1.3732e-10	3.63971e-10	-7.38461e-11	-1.54943e-13	5.97828e-09	-1.37183e-10	1.26298e-10	-0.0123524	-2.59177e-05	-0.0229469	0.0211261
253	2022-03-31 12:33:47	3393473	-1.17368e-10	-8.93989e-11	6.01834e-09	-1.33256e-10	3.62182e-10	-7.60545e-11	-1.78798e-13	5.98825e-09	-1.33123e-10	1.25677e-10	-0.0127006	-2.98581e-05	-0.0222307	0.0209873
254	2022-03-31 12:34:01	3407516	-1.11531e-10	-9.93086e-11	6.00287e-09	-1.30053e-10	3.54811e-10	-7.22721e-11	-1.98617e-13	5.97286e-09	-1.29923e-10	1.23119e-10	-0.0121001	-3.32533e-05	-0.0217522	0.0206132
255	2022-03-31 12:34:15	3421559	-1.08789e-10	-8.93374e-11	5.97393e-09	-1.33074e-10	3.50572e-10	-7.04953e-11	-1.78675e-13	5.94406e-09	-1.32941e-10	1.21648e-10	-0.0118598	-3.00594e-05	-0.0223653	0.0204656
256	2022-03-31 12:34:29	3435603	-1.15003e-10	-1.02257e-10	5.94817e-09	-1.37857e-10	3.56439e-10	-7.45219e-11	-2.04514e-13	5.91843e-09	-1.37719e-10	1.23684e-10	-0.0125915	-3.45555e-05	-0.0232695	0.0208982
257	2022-03-31 12:34:43	3449646	-1.088e-10	-9.51731e-11	5.93814e-09	-1.34278e-10	3.41964e-10	-7.05024e-11	-1.90346e-13	5.90845e-09	-1.34144e-10	1.18662e-10	-0.0119325	-3.22159e-05	-0.0227037	0.0200834
258	2022-03-31 12:34:57	3463689	-1.12025e-10	-8.97982e-11	5.97822e-09	-1.41534e-10	3.38071e-10	-7.25922e-11	-1.79596e-13	5.94833e-09	-1.41392e-10	1.17311e-10	-0.0122038	-3.01927e-05	-0.0237701	0.0197216
259	2022-03-31 12:35:11	3477733	-1.19679e-10	-9.1723e-11	5.94812e-09	-1.39696e-10	3.34363e-10	-7.7552e-11	-1.83446e-13	5.91838e-09	-1.39556e-10	1.16024e-10	-0.0131036	-3.0996e-05	-0.0235802	0.019604
260	2022-03-31 12:35:25	3491776	-1.18669e-10	-8.89791e-11	5.91778e-09	-1.34095e-10	3.33188e-10	-7.68975e-11	-1.77958e-13	5.88819e-09	-1.33961e-10	1.15616e-10	-0.0130596	-3.02229e-05	-0.0227508	0.0196353
261	2022-03-31 12:35:39	3505819	-1.15562e-10	-1.02759e-10	5.90157e-09	-1.31418e-10	3.23927e-10	-7.48842e-11	-2.05518e-13	5.87206e-09	-1.31287e-10	1.12403e-10	-0.0127526	-3.49993e-05	-0.0223578	0.0191419
262	2022-03-31 12:35:53	3519863	-1.11423e-10	-9.19687e-11	5.88325e-09	-1.38943e-10	3.20833e-10	-7.22021e-11	-1.83937e-13	5.85383e-09	-1.38804e-10	1.11329e-10	-0.0123342	-3.14217e-05	-0.0237116	0.0190181
263	2022-03-31 12:36:07	3533906	-1.16798e-10	-8.99415e-11	5.8704e-09	-1.24022e-10	3.22876e-10	-7.56851e-11	-1.79883e-13	5.84105e-09	-1.23898e-10	1.12038e-10	-0.0129575	-3.07964e-05	-0.0212116	0.0191811
264	2022-03-31 12:36:21	3547949	-1.21378e-10	-1.02248e-10	5.87197e-09	-1.41813e-10	3.20564e-10	-7.86529e-11	-2.04496e-13	5.84261e-09	-1.41671e-10	1.11236e-10	-0.013462	-3.50008e-05	-0.0242479	0.0190387
265	2022-03-31 12:36:35	3561993	-1.21947e-10	-9.17434e-11	5.88854e-09	-1.36718e-10	3.15289e-10	-7.90217e-11	-1.83487e-13	5.8591e-09	-1.36581e-10	1.09405e-10	-0.013487	-3.13166e-05	-0.023311	0.0186727
266	2022-03-31 12:36:50	3576036	-1.21098e-10	-9.72514e-11	5.87937e-09	-1.29881e-10	3.19021e-10	-7.84715e-11	-1.94503e-13	5.84997e-09	-1.29751e-10	1.107e-10	-0.013414	-3.32485e-05	-0.0221798	0.0189232
267	2022-03-31 12:37:04	3590079	-1.08402e-10	-8.06965e-11	5.8664e-09	-1.24474e-10	3.12249e-10	-7.02445e-11	-1.61393e-13	5.83707e-09	-1.2435e-10	1.0835e-10	-0.0120342	-2.76497e-05	-0.0213034	0.0185625
268	2022-03-31 12:37:18	3604122	-1.08241e-10	-9.48046e-11	5.85447e-09	-1.34697e-10	3.1039e-10	-7.01402e-11	-1.89609e-13	5.8252e-09	-1.34562e-10	1.07705e-10	-0.0120408	-3.25498e-05	-0.0231	0.0184896
269	2022-03-31 12:37:32	3618166	-1.11154e-10	-9.29822e-11	5.87226e-09	-1.44512e-10	3.07058e-10	-7.20278e-11	-1.85964e-13	5.8429e-09	-1.44367e-10	1.06549e-10	-0.0123274	-3.18274e-05	-0.0247082	0.0182357
270	2022-03-31 12:37:46	3632209	-1.07478e-10	-9.00439e-11	5.84856e-09	-1.36041e-10	3.0986e-10	-6.96457e-11	-1.80088e-13	5.81932e-09	-1.35905e-10	1.07521e-10	-0.011968	-3.09466e-05	-0.0233541	0.0184766
271	2022-03-31 12:38:00	3646252	-1.12315e-10	-9.00439e-11	5.855e-09	-1.38642e-10	3.08324e-10	-7.27801e-11	-1.80088e-13	5.82573e-09	-1.38503e-10	1.06988e-10	-0.0124929	-3.09125e-05	-0.0237744	0.0183648
272	2022-03-31 12:38:14	3660296	-1.02006e-10	-9.05455e-11	5.8239e-09	-9.13103e-11	3.02666e-10	-6.60999e-11	-1.81091e-13	5.79478e-09	-9.1219e-11	1.05025e-10	-0.0114068	-3.12507e-05	-0.0157416	0.0181241
273	2022-03-31 12:38:28	3674339	-1.1855e-10	-9.45384e-11	5.82113e-09	-1.33514e-10	2.96906e-10	-7.68204e-11	-1.89077e-13	5.79202e-09	-1.3338e-10	1.03026e-10	-0.0132631	-3.26443e-05	-0.0230283	0.0177876
274	2022-03-31 12:38:42	3688382	-1.19883e-10	-9.33712e-11	5.80794e-09	-1.29257e-10	2.92691e-10	-7.76842e-11	-1.86742e-13	5.7789e-09	-1.29128e-10	1.01564e-10	-0.0134427	-3.23145e-05	-0.0223447	0.0175749
275	2022-03-31 12:38:56	3702425	-1.07413e-10	-9.90533e-11	5.78963e-09	-1.27548e-10	2.97083e-10	-6.96036e-11	-1.98107e-13	5.76068e-09	-1.2742e-10	1.03088e-10	-0.0120825	-3.43894e-05	-0.022119	0.0178951
276	2022-03-31 12:39:10	3716469	-1.11197e-10	-9.09244e-11	5.82057e-09	-1.40136e-10	3.01829e-10	-7.20557e-11	-1.81849e-13	5.79147e-09	-1.39996e-10	1.04735e-10	-0.0124417	-3.13994e-05	-0.0241728	0.0180843
277	2022-03-31 12:39:24	3730512	-1.1181e-10	-9.52752e-11	5.81659e-09	-1.32418e-10	2.99179e-10	-7.24529e-11	-1.9055e-13	5.78751e-09	-1.32286e-10	1.03815e-10	-0.0125188	-3.29244e-05	-0.0228571	0.0179378
278	2022-03-31 12:39:38	3744555	-1.02049e-10	-8.70441e-11	5.79373e-09	-1.37685e-10	2.90157e-10	-6.61278e-11	-1.74088e-13	5.76476e-09	-1.37547e-10	1.00684e-10	-0.011471	-3.01987e-05	-0.02386	0.0174655
279	2022-03-31 12:39:52	3758599	-1.16594e-10	-9.0351e-11	5.80424e-09	-1.22345e-10	2.88276e-10	-7.55529e-11	-1.80702e-13	5.77522e-09	-1.22223e-10	1.00032e-10	-0.0130823	-3.12892e-05	-0.0211633	0.0173209
280	2022-03-31 12:40:06	3772642	-1.0794e-10	-7.71849e-11	5.78991e-09	-1.22109e-10	2.97482e-10	-6.99451e-11	-1.5437e-13	5.76096e-09	-1.21987e-10	1.03226e-10	-0.0121412	-2.67958e-05	-0.0211747	0.0179182
281	2022-03-31 12:40:20	3786685	-1.1582e-10	-9.4303e-11	6.32586e-09	-1.42512e-10	2.83292e-10	-7.50514e-11	-1.88606e-13	6.29423e-09	-1.42369e-10	9.83023e-11	-0.0119238	-2.99649e-05	-0.022619	0.0156178
282	2022-03-31 12:40:34	3800729	-1.13734e-10	-9.68419e-11	5.29083e-09	-1.28892e-10	2.95816e-10	-7.36996e-11	-1.93684e-13	5.26438e-09	-1.28763e-10	1.02648e-10	-0.0139997	-3.67914e-05	-0.0244593	0.0194986
283	2022-03-31 12:40:48	3814772	-1.20797e-10	-9.77114e-11	5.06538e-09	-1.34342e-10	2.94058e-10	-7.82765e-11	-1.95423e-13	5.04005e-09	-1.34208e-10	1.02038e-10	-0.0155309	-3.8774e-05	-0.0266282	0.0202454
284	2022-03-31 12:41:02	3828815	-1.14584e-10	-1.01306e-10	5.00444e-09	-1.43942e-10	2.93336e-10	-7.42504e-11	-2.02612e-13	4.97942e-09	-1.43798e-10	1.01788e-10	-0.0149115	-4.06899e-05	-0.0288785	0.0204417
285	2022-03-31 12:41:16	3842859	-1.20894e-10	-9.72714e-11	5.16969e-09	-1.47199e-10	2.87416e-10	-7.83393e-11	-1.94543e-13	5.14384e-09	-1.47052e-10	9.97334e-11	-0.0152297	-3.78205e-05	-0.0285879	0.0193889
286	2022-03-31 12:41:30	3856902	-1.12143e-10	-9.59305e-11	5.3361e-09	-1.40384e-10	2.85504e-10	-7.26687e-11	-1.91861e-13	5.30942e-09	-1.40244e-10	9.90699e-11	-0.0136867	-3.6136e-05	-0.0264141	0.0186593
287	2022-03-31 12:41:44	3870945	-1.21259e-10	-1.0108e-10	5.43045e-09	-1.54498e-10	2.85189e-10	-7.85758e-11	-2.0216e-13	5.4033e-09	-1.54344e-10	9.89606e-11	-0.0145422	-3.74142e-05	-0.0285647	0.0183148
288	2022-03-31 12:41:58	3884988	-1.15433e-10	-8.40955e-11	5.71133e-09	-1.42835e-10	2.89574e-10	-7.48006e-11	-1.68191e-13	5.68277e-09	-1.42692e-10	1.00482e-10	-0.0131627	-2.95966e-05	-0.0251096	0.0176819
289	2022-03-31 12:42:13	3899032	-1.12509e-10	-9.95952e-11	9.41967e-09	-1.29107e-10	3.18652e-10	-7.29058e-11	-1.9919e-13	9.37257e-09	-1.28978e-10	1.10572e-10	-0.00777864	-2.12525e-05	-0.0137612	0.0117974
290	2022-03-31 12:42:27	3913075	-1.16712e-10	-9.58276e-11	9.41967e-09	-1.25183e-10	2.88399e-10	-7.56294e-11	-1.91655e-13	9.37257e-09	-1.25058e-10	1.00074e-10	-0.00806922	-2.04485e-05	-0.013343	0.0106774
291	2022-03-31 12:42:41	3927118	-1.19496e-10	-1.00947e-10	9.41967e-09	-1.24205e-10	2.63266e-10	-7.74334e-11	-2.01894e-13	9.37257e-09	-1.24081e-10	9.13533e-11	-0.0082617	-2.15409e-05	-0.0132387	0.00974688
292	2022-03-31 12:42:55	3941162	-1.18024e-10	-1.05533e-10	9.41967e-09	-1.2041e-10	2.44446e-10	-7.64796e-11	-2.11066e-13	9.37257e-09	-1.2029e-10	8.48228e-11	-0.00815993	-2.25195e-05	-0.0128342	0.00905011
293	2022-03-31 12:43:09	3955205	-1.1525e-10	-1.0879e-10	9.41967e-09	-1.08381e-10	2.26425e-10	-7.4682e-11	-2.1758e-13	9.37257e-09	-1.08273e-10	7.85695e-11	-0.00796814	-2.32145e-05	-0.0115521	0.00838292
294	2022-03-31 12:43:23	3969248	-1.2629e-10	-1.05513e-10	9.41967e-09	-1.09488e-10	2.28874e-10	-8.18359e-11	-2.11026e-13	9.37257e-09	-1.09379e-10	7.94193e-11	-0.00873143	-2.25153e-05	-0.0116701	0.00847358
295	2022-03-31 12:43:37	3983292	-1.07112e-10	-1.03199e-10	9.41967e-09	-1.04973e-10	2.09171e-10	-6.94086e-11	-2.06398e-13	9.37257e-09	-1.04868e-10	7.25823e-11	-0.0074055	-2.20215e-05	-0.0111888	0.00774412
296	2022-03-31 12:43:51	3997335	-1.24506e-10	-9.13544e-11	9.41967e-09	-1.05403e-10	1.97646e-10	-8.06799e-11	-1.82709e-13	9.37257e-09	-1.05298e-10	6.85832e-11	-0.00860808	-1.9494e-05	-0.0112347	0.00731743
297	2022-03-31 12:44:05	4011378	-8.52903e-11	-1.02585e-10	9.41967e-09	-1.00619e-10	6.33972e-10	-5.52681e-11	-2.0517e-13	9.37257e-09	-1.00518e-10	2.19988e-10	-0.00589679	-2.18905e-05	-0.0107247	0.0234715
298	2022-03-31 12:44:19	4025422	3.81454e-09	-9.69029e-11	9.41967e-09	-2.65202e-11	1.78922e-09	2.47182e-09	-1.93806e-13	9.37257e-09	-2.64937e-11	6.20859e-10	0.263729	-2.0678e-05	-0.00282672	0.0662422
299	2022-03-31 12:44:36	4042716	7.87567e-09	-8.69008e-11	9.41967e-09	-6.77248e-13	2.31356e-09	5.10343e-09	-1.73802e-13	9.37257e-09	-6.76571e-13	8.02805e-10	0.544507	-1.85436e-05	-7.21862e-05	0.0856548
300	2022-03-31 12:44:48	4054549	9.7015e-09	-9.14771e-11	9.41967e-09	1.81459e-11	2.29263e-09	6.28657e-09	-1.82954e-13	9.37257e-09	1.81278e-11	7.95543e-10	0.670741	-1.95202e-05	0.00193413	0.0848799
301	2022-03-31 12:45:01	4067423	1.09058e-08	-9.27365e-11	9.41967e-09	1.85974e-11	2.08469e-09	7.06696e-09	-1.85473e-13	9.37257e-09	1.85788e-11	7.23387e-10	0.754004	-1.97889e-05	0.00198225	0.0771813
302	2022-03-31 12:45:12	4078726	1.16382e-08	-9.375e-11	9.41967e-09	1.22442e-11	1.82645e-09	7.54155e-09	-1.875e-13	9.37257e-09	1.2232e-11	6.33778e-10	0.804641	-2.00052e-05	0.00130508	0.0676205
303	2022-03-31 12:45:24	4090030	1.22611e-08	-9.0177e-11	9.41967e-09	1.07392e-11	1.57523e-09	7.94519e-09	-1.80354e-13	9.37257e-09	1.07285e-11	5.46605e-10	0.847707	-1.92427e-05	0.00114467	0.0583196
304	2022-03-31 12:45:35	4101333	1.25298e-08	-9.34122e-11	9.41967e-09	6.29949e-12	1.37092e-09	8.11931e-09	-1.86824e-13	9.37257e-09	6.29319e-12	4.75709e-10	0.866284	-1.99331e-05	0.000671448	0.0507555
305	2022-03-31 12:45:46	4112636	1.2695e-08	-9.33508e-11	9.41967e-09	8.69673e-12	1.19804e-09	8.22636e-09	-1.86702e-13	9.37257e-09	8.68803e-12	4.1572e-10	0.877706	-1.992e-05	0.000926964	0.0443549
306	2022-03-31 12:45:57	4123939	1.29799e-08	-9.77524e-11	9.41967e-09	1.37169e-11	1.05654e-09	8.41098e-09	-1.95505e-13	9.37257e-09	1.37032e-11	3.66619e-10	0.897403	-2.08592e-05	0.00146205	0.0391162
307	2022-03-31 12:46:09	4135243	1.30189e-08	-8.89791e-11	9.41967e-09	7.19173e-12	9.51807e-10	8.43625e-09	-1.77958e-13	9.37257e-09	7.18454e-12	3.30277e-10	0.9001	-1.89871e-05	0.000766549	0.0352387
308	2022-03-31 12:46:20	4146546	1.2898e-08	-8.96241e-11	9.41967e-09	-5.14924e-12	8.63757e-10	8.3579e-09	-1.79248e-13	9.37257e-09	-5.14409e-12	2.99724e-10	0.891741	-1.91248e-05	-0.000548845	0.0319788
309	2022-03-31 12:46:31	4157849	1.13352e-08	-9.72514e-11	9.41967e-09	-3.49589e-11	6.5055e-10	7.34521e-09	-1.94503e-13	9.37257e-09	-3.49239e-11	2.25741e-10	0.783692	-2.07523e-05	-0.00372619	0.0240853
310	2022-03-31 12:46:43	4169663	6.19353e-09	-9.1252e-11	9.41967e-09	-6.55211e-11	5.4775e-10	4.01341e-09	-1.82504e-13	9.37257e-09	-6.54556e-11	1.90069e-10	0.428208	-1.94721e-05	-0.00698374	0.0202793
311	2022-03-31 12:46:55	4181496	4.19789e-09	-9.9381e-11	9.41967e-09	-7.62066e-11	4.88072e-10	2.72023e-09	-1.98762e-13	9.37257e-09	-7.61304e-11	1.69361e-10	0.290233	-2.12068e-05	-0.00812268	0.0180699
312	2022-03-31 12:47:07	4193329	2.96679e-09	-1.09936e-10	9.41967e-09	-9.39763e-11	4.4306e-10	1.92248e-09	-2.19872e-13	9.37257e-09	-9.38823e-11	1.53742e-10	0.205118	-2.34591e-05	-0.0100167	0.0164034
313	2022-03-31 12:47:19	4205163	2.12631e-09	-9.92371e-11	9.41967e-09	-1.06661e-10	3.97304e-10	1.37785e-09	-1.98474e-13	9.37257e-09	-1.06554e-10	1.37864e-10	0.147009	-2.11761e-05	-0.0113687	0.0147094
314	2022-03-31 12:47:30	4216996	1.55081e-09	-1.03302e-10	9.41967e-09	-1.04726e-10	3.68586e-10	1.00492e-09	-2.06604e-13	9.37257e-09	-1.04621e-10	1.27899e-10	0.10722	-2.20435e-05	-0.0111625	0.0136461
315	2022-03-31 12:47:42	4228829	1.12961e-09	-1.00271e-10	9.41967e-09	-1.15035e-10	3.4489e-10	7.31987e-10	-2.00542e-13	9.37257e-09	-1.1492e-10	1.19677e-10	0.0780989	-2.13967e-05	-0.0122613	0.0127688
316	2022-03-31 12:47:55	4241703	7.45844e-10	-1.11206e-10	9.41967e-09	-1.13466e-10	3.21785e-10	4.83307e-10	-2.22412e-13	9.37257e-09	-1.13353e-10	1.11659e-10	0.0515661	-2.37301e-05	-0.0120941	0.0119134
317	2022-03-31 12:48:09	4255747	5.18202e-10	-1.11277e-10	9.41967e-09	-1.18593e-10	3.04554e-10	3.35795e-10	-2.22554e-13	9.37257e-09	-1.18474e-10	1.0568e-10	0.0358274	-2.37452e-05	-0.0126405	0.0112755
318	2022-03-31 12:48:23	4269790	3.45633e-10	-1.07632e-10	9.41967e-09	-1.22657e-10	2.91201e-10	2.2397e-10	-2.15264e-13	9.37257e-09	-1.22534e-10	1.01047e-10	0.0238963	-2.29674e-05	-0.0130737	0.0107811
319	2022-03-31 12:48:37	4283833	2.0397e-10	-1.13417e-10	9.41967e-09	-1.25097e-10	4.46639e-10	1.32173e-10	-2.26834e-13	9.37257e-09	-1.24972e-10	1.54984e-10	0.0141021	-2.42019e-05	-0.0133338	0.0165359
320	2022-03-31 12:48:51	4297877	9.74378e-11	-1.03281e-10	9.41967e-09	-1.26989e-10	5.83594e-10	6.31397e-11	-2.06562e-13	9.37257e-09	-1.26862e-10	2.02507e-10	0.00673665	-2.2039e-05	-0.0135355	0.0216064
321	2022-03-31 12:49:05	4311920	5.51474e-12	-1.0363e-10	9.41967e-09	-1.36997e-10	6.44484e-10	3.57355e-12	-2.0726e-13	9.37257e-09	-1.3686e-10	2.23636e-10	0.000381278	-2.21135e-05	-0.0146022	0.0238607
322	2022-03-31 12:49:19	4325963	-3.06267e-11	-1.14308e-10	9.41967e-09	-1.37481e-10	6.64971e-10	-1.98461e-11	-2.28616e-13	9.37257e-09	-1.37344e-10	2.30745e-10	-0.00211747	-2.4392e-05	-0.0146538	0.0246192
323	2022-03-31 12:49:34	4340007	-6.82946e-11	-1.0711e-10	9.41967e-09	-1.36847e-10	6.48454e-10	-4.42549e-11	-2.1422e-13	9.37257e-09	-1.3671e-10	2.25014e-10	-0.00472175	-2.28561e-05	-0.0145862	0.0240077
324	2022-03-31 12:49:48	4354050	-8.00658e-11	-1.11564e-10	9.41967e-09	-1.40115e-10	6.39001e-10	-5.18826e-11	-2.23128e-13	9.37257e-09	-1.39975e-10	2.21733e-10	-0.00553558	-2.38065e-05	-0.0149345	0.0236577
325	2022-03-31 12:50:02	4368093	-8.35811e-11	-1.03199e-10	9.41967e-09	-1.39534e-10	6.25472e-10	-5.41606e-11	-2.06398e-13	9.37257e-09	-1.39394e-10	2.17039e-10	-0.00577862	-2.20215e-05	-0.0148726	0.0231568
326	2022-03-31 12:50:16	4382137	-9.22563e-11	-1.06537e-10	9.41967e-09	-1.26194e-10	5.84215e-10	-5.97821e-11	-2.13074e-13	9.37257e-09	-1.26068e-10	2.02723e-10	-0.00637841	-2.27338e-05	-0.0134507	0.0216293
327	2022-03-31 12:50:30	4396180	-9.10953e-11	-9.44155e-11	9.41967e-09	-1.50059e-10	5.67814e-10	-5.90298e-11	-1.88831e-13	9.37257e-09	-1.49909e-10	1.97031e-10	-0.00629814	-2.01472e-05	-0.0159944	0.0210221
328	2022-03-31 12:50:44	4410223	-9.7771e-11	-1.0752e-10	9.40933e-09	-1.33117e-10	5.37729e-10	-6.33556e-11	-2.1504e-13	9.36228e-09	-1.32984e-10	1.86592e-10	-0.00676711	-2.29688e-05	-0.0142042	0.0199302
329	2022-03-31 12:50:58	4424267	-1.06446e-10	-9.99333e-11	8.22718e-09	-1.49672e-10	5.18341e-10	-6.8977e-11	-1.99867e-13	8.18604e-09	-1.49522e-10	1.79864e-10	-0.00842617	-2.44155e-05	-0.0182655	0.0219721
330	2022-03-31 12:51:12	4438310	-1.17024e-10	-9.57667e-11	7.45904e-09	-1.44963e-10	5.00588e-10	-7.58316e-11	-1.91533e-13	7.42174e-09	-1.44818e-10	1.73704e-10	-0.0102175	-2.58071e-05	-0.0195127	0.0234047
331	2022-03-31 12:51:26	4452353	-1.03425e-10	-1.16355e-10	7.02394e-09	-1.4693e-10	4.77345e-10	-6.70194e-11	-2.3271e-13	6.98882e-09	-1.46783e-10	1.65639e-10	-0.00958952	-3.32975e-05	-0.0210026	0.0237005
332	2022-03-31 12:51:40	4466397	-1.06553e-10	-1.15976e-10	6.6937e-09	-1.38739e-10	4.59078e-10	-6.90463e-11	-2.31952e-13	6.66023e-09	-1.386e-10	1.593e-10	-0.010367	-3.48264e-05	-0.0208101	0.0239181
333	2022-03-31 12:51:54	4480440	-1.18851e-10	-1.04182e-10	6.48666e-09	-1.53402e-10	4.58333e-10	-7.70154e-11	-2.08364e-13	6.45423e-09	-1.53249e-10	1.59042e-10	-0.0119326	-3.22833e-05	-0.0237439	0.0246415
334	2022-03-31 12:52:08	4494483	-1.1496e-10	-9.79067e-11	6.35927e-09	-1.37481e-10	4.39251e-10	-7.44941e-11	-1.95813e-13	6.32747e-09	-1.37344e-10	1.5242e-10	-0.0117731	-3.09465e-05	-0.0217059	0.0240886
335	2022-03-31 12:52:22	4508527	-1.26591e-10	-1.12383e-10	6.27411e-09	-1.51316e-10	4.1746e-10	-8.2031e-11	-2.24766e-13	6.24274e-09	-1.51165e-10	1.44859e-10	-0.0131402	-3.60044e-05	-0.0242145	0.0232043
336	2022-03-31 12:52:36	4522570	-1.28064e-10	-1.00783e-10	6.18962e-09	-1.38814e-10	3.99162e-10	-8.29855e-11	-2.01566e-13	6.15867e-09	-1.38675e-10	1.38509e-10	-0.0134746	-3.27288e-05	-0.0225171	0.0224901
337	2022-03-31 12:52:50	4536613	-1.14175e-10	-1.17297e-10	6.13534e-09	-1.26828e-10	3.99446e-10	-7.39854e-11	-2.34594e-13	6.10466e-09	-1.26701e-10	1.38608e-10	-0.0121195	-3.84287e-05	-0.0207548	0.0227052
338	2022-03-31 12:53:04	4550657	-1.2385e-10	-1.06916e-10	6.0936e-09	-1.49113e-10	3.87866e-10	-8.02548e-11	-2.13832e-13	6.06313e-09	-1.48964e-10	1.3459e-10	-0.0132365	-3.52676e-05	-0.0245688	0.022198
339	2022-03-31 12:53:18	4564700	-1.20991e-10	-9.87152e-11	6.0555e-09	-1.45769e-10	3.91521e-10	-7.84022e-11	-1.9743e-13	6.02522e-09	-1.45623e-10	1.35858e-10	-0.0130123	-3.27673e-05	-0.0241689	0.0225482
340	2022-03-31 12:53:32	4578743	-1.2084e-10	-9.4395e-11	6.05139e-09	-1.36417e-10	3.80119e-10	-7.83043e-11	-1.8879e-13	6.02113e-09	-1.36281e-10	1.31901e-10	-0.0130049	-3.13546e-05	-0.0226337	0.0219064
341	2022-03-31 12:53:46	4592787	-1.19217e-10	-1.05339e-10	5.99737e-09	-1.44576e-10	3.68847e-10	-7.72526e-11	-2.10678e-13	5.96738e-09	-1.44431e-10	1.2799e-10	-0.0129458	-3.53049e-05	-0.0242035	0.0214482
342	2022-03-31 12:54:00	4606830	-1.18486e-10	-1.02166e-10	5.96728e-09	-1.41007e-10	3.64646e-10	-7.67789e-11	-2.04332e-13	5.93744e-09	-1.40866e-10	1.26532e-10	-0.0129313	-3.44141e-05	-0.023725	0.0213109
343	2022-03-31 12:54:14	4620873	-1.16529e-10	-1.00496e-10	5.96123e-09	-1.36008e-10	3.58159e-10	-7.55108e-11	-2.00992e-13	5.93142e-09	-1.35872e-10	1.24281e-10	-0.0127306	-3.3886e-05	-0.0229071	0.020953
344	2022-03-31 12:54:28	4634917	-1.25291e-10	-1.03507e-10	5.95334e-09	-1.47597e-10	3.53689e-10	-8.11886e-11	-2.07014e-13	5.92357e-09	-1.47449e-10	1.2273e-10	-0.013706	-3.49475e-05	-0.024892	0.0207189
345	2022-03-31 12:54:42	4648960	-1.13928e-10	-1.02175e-10	5.91587e-09	-1.47382e-10	3.54956e-10	-7.38253e-11	-2.0435e-13	5.88629e-09	-1.47235e-10	1.2317e-10	-0.0125419	-3.47163e-05	-0.0250131	0.0209248
346	2022-03-31 12:54:57	4663003	-1.12057e-10	-9.96981e-11	5.91058e-09	-1.41115e-10	3.43792e-10	-7.26129e-11	-1.99396e-13	5.88103e-09	-1.40974e-10	1.19296e-10	-0.012347	-3.3905e-05	-0.023971	0.0202849
347	2022-03-31 12:55:11	4677046	-1.20066e-10	-9.90733e-11	5.91559e-09	-1.46726e-10	3.41542e-10	-7.78028e-11	-1.98147e-13	5.88601e-09	-1.46579e-10	1.18515e-10	-0.0132182	-3.3664e-05	-0.024903	0.020135
348	2022-03-31 12:55:25	4691090	-1.11058e-10	-1.05943e-10	5.90202e-09	-1.45952e-10	3.41296e-10	-7.19656e-11	-2.11886e-13	5.87251e-09	-1.45806e-10	1.1843e-10	-0.0122547	-3.6081e-05	-0.0248286	0.0201668
349	2022-03-31 12:55:39	4705133	-1.07188e-10	-9.84695e-11	5.87018e-09	-1.39749e-10	3.28757e-10	-6.94578e-11	-1.96939e-13	5.84083e-09	-1.39609e-10	1.14079e-10	-0.0118918	-3.37176e-05	-0.0239023	0.0195312
350	2022-03-31 12:55:53	4719176	-1.24388e-10	-9.461e-11	5.87951e-09	-1.44834e-10	3.30024e-10	-8.06034e-11	-1.8922e-13	5.85011e-09	-1.44689e-10	1.14518e-10	-0.0137781	-3.23447e-05	-0.0247327	0.0195754
351	2022-03-31 12:56:07	4733220	-1.21851e-10	-1.04787e-10	5.86291e-09	-1.38416e-10	3.19205e-10	-7.89594e-11	-2.09574e-13	5.8336e-09	-1.38278e-10	1.10764e-10	-0.0135353	-3.59254e-05	-0.0237037	0.0189873
352	2022-03-31 12:56:21	4747263	-1.12982e-10	-1.05595e-10	5.84038e-09	-1.41416e-10	3.27981e-10	-7.32123e-11	-2.1119e-13	5.81118e-09	-1.41275e-10	1.13809e-10	-0.0125985	-3.6342e-05	-0.0243108	0.0195846
353	2022-03-31 12:56:35	4761306	-1.29472e-10	-9.98314e-11	5.84125e-09	-1.3861e-10	3.16003e-10	-8.38979e-11	-1.99663e-13	5.81204e-09	-1.38471e-10	1.09653e-10	-0.0144352	-3.43533e-05	-0.0238249	0.0188665
354	2022-03-31 12:56:49	4775350	-1.2844e-10	-1.0539e-10	5.85227e-09	-1.32536e-10	3.20226e-10	-8.32291e-11	-2.1078e-13	5.82301e-09	-1.32403e-10	1.11118e-10	-0.0142931	-3.61978e-05	-0.022738	0.0190826
355	2022-03-31 12:57:03	4789393	-1.19593e-10	-9.59305e-11	5.81944e-09	-1.39782e-10	3.06751e-10	-7.74963e-11	-1.91861e-13	5.79034e-09	-1.39642e-10	1.06443e-10	-0.0133837	-3.31347e-05	-0.0241164	0.0183828
356	2022-03-31 12:57:17	4803436	-1.18314e-10	-9.50912e-11	5.8294e-09	-1.34202e-10	3.08248e-10	-7.66675e-11	-1.90182e-13	5.80025e-09	-1.34068e-10	1.06962e-10	-0.013218	-3.27886e-05	-0.0231141	0.0184409
357	2022-03-31 12:57:31	4817479	-1.22291e-10	-8.72693e-11	5.83348e-09	-1.35912e-10	3.10029e-10	-7.92446e-11	-1.74539e-13	5.80431e-09	-1.35776e-10	1.0758e-10	-0.0136527	-3.00705e-05	-0.0233923	0.0185345
358	2022-03-31 12:57:45	4831523	-1.1338e-10	-9.94314e-11	5.78364e-09	-1.3187e-10	3.05015e-10	-7.34702e-11	-1.98863e-13	5.75472e-09	-1.31738e-10	1.0584e-10	-0.0127669	-3.45565e-05	-0.0228922	0.0183919
359	2022-03-31 12:57:59	4845566	-1.11724e-10	-1.00793e-10	5.81118e-09	-1.47092e-10	3.09139e-10	-7.23972e-11	-2.01586e-13	5.78212e-09	-1.46945e-10	1.07271e-10	-0.0125209	-3.48637e-05	-0.0254137	0.0185522
360	2022-03-31 12:58:13	4859609	-1.24871e-10	-1.01848e-10	5.7848e-09	-1.42523e-10	3.01829e-10	-8.09164e-11	-2.03696e-13	5.75588e-09	-1.4238e-10	1.04735e-10	-0.0140581	-3.53892e-05	-0.0247365	0.0181961
361	2022-03-31 12:58:27	4873653	-1.26581e-10	-9.6801e-11	5.79434e-09	-1.55778e-10	2.87746e-10	-8.20245e-11	-1.93602e-13	5.76537e-09	-1.55622e-10	9.98479e-11	-0.0142271	-3.35802e-05	-0.0269926	0.0173186
362	2022-03-31 12:58:41	4887696	-1.3288e-10	-1.10591e-10	5.76742e-09	-1.5309e-10	2.96054e-10	-8.61062e-11	-2.21182e-13	5.73858e-09	-1.52937e-10	1.02731e-10	-0.0150048	-3.8543e-05	-0.0266506	0.0179018
363	2022-03-31 12:58:55	4901739	-1.21775e-10	-1.0022e-10	5.78427e-09	-1.49381e-10	2.85519e-10	-7.89102e-11	-2.0044e-13	5.75535e-09	-1.49232e-10	9.90751e-11	-0.0137108	-3.48267e-05	-0.0259292	0.0172144
364	2022-03-31 12:59:09	4915782	-1.17357e-10	-1.0923e-10	5.78185e-09	-1.34589e-10	3.0169e-10	-7.60473e-11	-2.1846e-13	5.75294e-09	-1.34454e-10	1.04686e-10	-0.0132189	-3.79736e-05	-0.0233714	0.018197
365	2022-03-31 12:59:23	4929826	-1.27021e-10	-1.06281e-10	5.79272e-09	-1.36675e-10	2.88959e-10	-8.23096e-11	-2.12562e-13	5.76376e-09	-1.36538e-10	1.00269e-10	-0.0142805	-3.68791e-05	-0.0236891	0.0173964
366	2022-03-31 12:59:37	4943869	-1.18303e-10	-9.84486e-11	5.77488e-09	-1.43523e-10	2.83922e-10	-7.66603e-11	-1.96897e-13	5.74601e-09	-1.43379e-10	9.85209e-11	-0.0133415	-3.42668e-05	-0.0249529	0.017146
367	2022-03-31 12:59:51	4957912	-1.21829e-10	-9.6381e-11	5.77871e-09	-1.46167e-10	2.92e-10	-7.89452e-11	-1.92762e-13	5.74982e-09	-1.46021e-10	1.01324e-10	-0.01373	-3.35249e-05	-0.0253957	0.0176221
368	2022-03-31 13:00:05	4971956	-1.30569e-10	-9.7179e-11	5.80278e-09	-1.4162e-10	2.91232e-10	-8.46087e-11	-1.94358e-13	5.77377e-09	-1.41478e-10	1.01058e-10	-0.014654	-3.36623e-05	-0.0245037	0.0175029
369	2022-03-31 13:00:19	4985999	-1.2428e-10	-9.934e-11	5.77333e-09	-1.43157e-10	2.81549e-10	-8.05334e-11	-1.9868e-13	5.74446e-09	-1.43014e-10	9.76975e-11	-0.0140193	-3.45863e-05	-0.0248959	0.0170072
370	2022-03-31 13:00:34	5000042	-1.19281e-10	-9.92886e-11	5.75972e-09	-1.40276e-10	2.80943e-10	-7.72941e-11	-1.98577e-13	5.73092e-09	-1.40136e-10	9.74872e-11	-0.0134872	-3.46501e-05	-0.0244526	0.0170107
371	2022-03-31 13:00:48	5014085	-1.19378e-10	-1.06087e-10	5.75611e-09	-1.42297e-10	2.81142e-10	-7.73569e-11	-2.12174e-13	5.72733e-09	-1.42155e-10	9.75563e-11	-0.0135066	-3.70459e-05	-0.0248204	0.0170335
372	2022-03-31 13:01:02	5028129	-1.15164e-10	-1.03936e-10	5.75696e-09	-1.47242e-10	2.67682e-10	-7.46263e-11	-2.07872e-13	5.72818e-09	-1.47095e-10	9.28857e-11	-0.0130279	-3.62894e-05	-0.0256792	0.0162156
373	2022-03-31 13:01:16	5042172	-1.22216e-10	-1.12025e-10	5.75568e-09	-1.44264e-10	2.53569e-10	-7.9196e-11	-2.2405e-13	5.7269e-09	-1.4412e-10	8.79884e-11	-0.0138288	-3.91224e-05	-0.0251654	0.0153641
374	2022-03-31 13:01:30	5056215	-1.26387e-10	-9.93086e-11	5.75522e-09	-1.45909e-10	2.82294e-10	-8.18988e-11	-1.98617e-13	5.72644e-09	-1.45763e-10	9.7956e-11	-0.0143019	-3.46842e-05	-0.0254544	0.0171059
375	2022-03-31 13:01:44	5070259	-1.20636e-10	-1.00353e-10	5.08636e-09	-1.38986e-10	2.85051e-10	-7.81721e-11	-2.00706e-13	5.06093e-09	-1.38847e-10	9.89127e-11	-0.0154462	-3.96579e-05	-0.0274351	0.0195444
376	2022-03-31 13:01:58	5084302	-1.24914e-10	-1.04438e-10	5.00918e-09	-1.42136e-10	2.88851e-10	-8.09443e-11	-2.08876e-13	4.98413e-09	-1.41994e-10	1.00231e-10	-0.0162404	-4.19082e-05	-0.0284892	0.0201101
377	2022-03-31 13:02:12	5098345	-1.15411e-10	-1.03332e-10	5.11283e-09	-1.45318e-10	2.82924e-10	-7.47863e-11	-2.06664e-13	5.08727e-09	-1.45173e-10	9.81746e-11	-0.0147007	-4.06238e-05	-0.0285365	0.0192981
378	2022-03-31 13:02:26	5112388	-1.24108e-10	-1.00487e-10	5.27938e-09	-1.41867e-10	2.78294e-10	-8.0422e-11	-2.00974e-13	5.25298e-09	-1.41725e-10	9.6568e-11	-0.0153098	-3.8259e-05	-0.0269799	0.0183835
379	2022-03-31 13:02:40	5126432	-1.24259e-10	-1.06895e-10	5.36237e-09	-1.39309e-10	2.91424e-10	-8.05198e-11	-2.1379e-13	5.33556e-09	-1.3917e-10	1.01124e-10	-0.0150912	-4.00689e-05	-0.0260834	0.0189529
380	2022-03-31 13:02:54	5140475	-1.2614e-10	-9.95238e-11	5.45728e-09	-1.44576e-10	2.66622e-10	-8.17387e-11	-1.99048e-13	5.42999e-09	-1.44431e-10	9.25178e-11	-0.0150532	-3.66571e-05	-0.0265988	0.0170383
381	2022-03-31 13:03:08	5154518	-1.24689e-10	-1.0063e-10	9.41967e-09	-1.31579e-10	3.0513e-10	-8.07985e-11	-2.0126e-13	9.37257e-09	-1.31447e-10	1.0588e-10	-0.00862074	-2.14733e-05	-0.0140247	0.0112968
382	2022-03-31 13:03:22	5168562	-1.13046e-10	-9.8981e-11	9.41967e-09	-1.42684e-10	3.08386e-10	-7.32538e-11	-1.97962e-13	9.37257e-09	-1.42541e-10	1.0701e-10	-0.00781576	-2.11214e-05	-0.0152083	0.0114174
383	2022-03-31 13:03:36	5182605	-1.36546e-10	-1.10704e-10	9.41967e-09	-1.35933e-10	2.60464e-10	-8.84818e-11	-2.21408e-13	9.37257e-09	-1.35797e-10	9.0381e-11	-0.0094405	-2.3623e-05	-0.0144888	0.00964314
384	2022-03-31 13:03:50	5196648	-1.29053e-10	-1.174e-10	9.41967e-09	-1.23065e-10	2.405e-10	-8.36263e-11	-2.348e-13	9.37257e-09	-1.22942e-10	8.34535e-11	-0.00892245	-2.50518e-05	-0.0131172	0.00890401
385	2022-03-31 13:04:04	5210692	-1.24506e-10	-1.02227e-10	9.41967e-09	-1.30107e-10	2.28045e-10	-8.06799e-11	-2.04454e-13	9.37257e-09	-1.29977e-10	7.91316e-11	-0.00860808	-2.18141e-05	-0.0138678	0.00844289
386	2022-03-31 13:04:18	5224735	-1.27333e-10	-1.07776e-10	9.41967e-09	-1.22087e-10	2.08787e-10	-8.25118e-11	-2.15552e-13	9.37257e-09	-1.21965e-10	7.24491e-11	-0.00880354	-2.29982e-05	-0.013013	0.00772991
387	2022-03-31 13:04:32	5238778	-1.34783e-10	-1.08431e-10	9.41967e-09	-1.28172e-10	2.02261e-10	-8.73394e-11	-2.16862e-13	9.37257e-09	-1.28044e-10	7.01846e-11	-0.00931861	-2.31379e-05	-0.0136615	0.00748829
388	2022-03-31 13:04:46	5252822	-1.30322e-10	-1.23256e-10	9.41967e-09	-1.23517e-10	1.90751e-10	-8.44487e-11	-2.46512e-13	9.37257e-09	-1.23393e-10	6.61906e-11	-0.00901019	-2.63014e-05	-0.0131654	0.00706216
389	2022-03-31 13:05:00	5266865	-1.33923e-10	-1.07848e-10	9.41967e-09	-1.25258e-10	3.14989e-10	-8.67821e-11	-2.15696e-13	9.37257e-09	-1.25133e-10	1.09301e-10	-0.00925916	-2.30135e-05	-0.013351	0.0116618
390	2022-03-31 13:05:14	5280908	1.46376e-09	-1.0108e-10	9.41967e-09	-6.31561e-11	1.43769e-09	9.48516e-10	-2.0216e-13	9.37257e-09	-6.30929e-11	4.98878e-10	0.101201	-2.15693e-05	-0.00673166	0.0532275
391	2022-03-31 13:05:32	5298203	6.68293e-09	-1.05278e-10	9.41967e-09	-2.85949e-11	2.11186e-09	4.33054e-09	-2.10556e-13	9.37257e-09	-2.85663e-11	7.32815e-10	0.462044	-2.24651e-05	-0.00304786	0.0781872
392	2022-03-31 13:05:44	5310036	8.53049e-09	-1.11635e-10	9.41967e-09	-1.18249e-12	2.22891e-09	5.52776e-09	-2.2327e-13	9.37257e-09	-1.18131e-12	7.73432e-10	0.58978	-2.38216e-05	-0.000126039	0.0825208
393	2022-03-31 13:05:55	5321869	9.96003e-09	-8.37987e-11	9.41967e-09	1.27924e-12	2.09795e-09	6.4541e-09	-1.67597e-13	9.37257e-09	1.27796e-12	7.27989e-10	0.688616	-1.78817e-05	0.000136351	0.0776722
394	2022-03-31 13:06:08	5334743	1.11692e-08	-9.44565e-11	9.41967e-09	9.05148e-12	1.84334e-09	7.23764e-09	-1.88913e-13	9.37257e-09	9.04243e-12	6.39639e-10	0.772215	-2.01559e-05	0.000964776	0.0682458
395	2022-03-31 13:06:20	5346047	1.1778e-08	-1.02411e-10	9.41967e-09	1.26849e-12	1.59662e-09	7.63214e-09	-2.04822e-13	9.37257e-09	1.26722e-12	5.54027e-10	0.814306	-2.18533e-05	0.000135205	0.0591115
396	2022-03-31 13:06:31	5357350	1.21206e-08	-9.15079e-11	9.41967e-09	-2.34349e-12	1.37906e-09	7.85415e-09	-1.83016e-13	9.37257e-09	-2.34115e-12	4.78534e-10	0.837993	-1.95267e-05	-0.000249787	0.0510568
397	2022-03-31 13:06:42	5368653	1.24538e-08	-1.12506e-10	9.41967e-09	6.87998e-13	1.20415e-09	8.07006e-09	-2.25012e-13	9.37257e-09	6.8731e-13	4.1784e-10	0.86103	-2.40075e-05	7.33321e-05	0.0445812
398	2022-03-31 13:06:53	5379957	1.25741e-08	-9.9299e-11	9.41967e-09	-1.58024e-12	1.05104e-09	8.14802e-09	-1.98598e-13	9.37257e-09	-1.57866e-12	3.64711e-10	0.869347	-2.11893e-05	-0.000168434	0.0389126
399	2022-03-31 13:07:05	5391260	1.28362e-08	-1.08329e-10	9.41967e-09	-6.44999e-14	9.31486e-10	8.31786e-09	-2.16658e-13	9.37257e-09	-6.44354e-14	3.23226e-10	0.887468	-2.31162e-05	-6.87489e-06	0.0344863
400	2022-03-31 13:07:16	5402563	1.29584e-08	-9.8981e-11	9.41967e-09	-1.18034e-11	8.40879e-10	8.39704e-09	-1.97962e-13	9.37257e-09	-1.17916e-11	2.91785e-10	0.895917	-2.11214e-05	-0.0012581	0.0311318
401	2022-03-31 13:07:27	5413866	1.17612e-08	-1.09865e-10	9.41967e-09	-1.79847e-11	6.88813e-10	7.62126e-09	-2.1973e-13	9.37257e-09	-1.79667e-11	2.39018e-10	0.813145	-2.34439e-05	-0.00191695	0.0255019
402	2022-03-31 13:07:39	5425680	7.43454e-09	-1.04315e-10	9.41967e-09	-7.08961e-11	5.48249e-10	4.81758e-09	-2.0863e-13	9.37257e-09	-7.08252e-11	1.90242e-10	0.514009	-2.22596e-05	-0.00755665	0.0202978
403	2022-03-31 13:07:51	5437513	4.90504e-09	-1.02032e-10	9.41967e-09	-8.75156e-11	4.75364e-10	3.17847e-09	-2.04064e-13	9.37257e-09	-8.74281e-11	1.64951e-10	0.339124	-2.17725e-05	-0.00932808	0.0175994
404	2022-03-31 13:08:03	5449347	3.41024e-09	-1.14349e-10	9.41967e-09	-9.52771e-11	4.22996e-10	2.20984e-09	-2.28698e-13	9.37257e-09	-9.51818e-11	1.4678e-10	0.235777	-2.44008e-05	-0.0101554	0.0156605
405	2022-03-31 13:08:15	5461180	2.37783e-09	-1.0925e-10	9.41967e-09	-1.06166e-10	3.90761e-10	1.54083e-09	-2.185e-13	9.37257e-09	-1.0606e-10	1.35594e-10	0.164398	-2.33127e-05	-0.011316	0.0144671
406	2022-03-31 13:08:27	5473013	1.76028e-09	-1.1398e-10	9.41967e-09	-1.09542e-10	3.64363e-10	1.14066e-09	-2.2796e-13	9.37257e-09	-1.09432e-10	1.26434e-10	0.121702	-2.4322e-05	-0.0116758	0.0134898
407	2022-03-31 13:08:38	5484847	1.26392e-09	-1.15485e-10	9.41967e-09	-1.18647e-10	3.39131e-10	8.1902e-10	-2.3097e-13	9.37257e-09	-1.18528e-10	1.17678e-10	0.0873848	-2.46432e-05	-0.0126463	0.0125556
408	2022-03-31 13:08:50	5496680	9.0604e-10	-1.14277e-10	9.41967e-09	-1.24936e-10	3.11864e-10	5.87114e-10	-2.28554e-13	9.37257e-09	-1.24811e-10	1.08217e-10	0.0626417	-2.43854e-05	-0.0133166	0.0115461
409	2022-03-31 13:09:03	5509553	6.08395e-10	-1.19959e-10	9.41967e-09	-1.26269e-10	2.95271e-10	3.9424e-10	-2.39918e-13	9.37257e-09	-1.26143e-10	1.02459e-10	0.0420632	-2.55979e-05	-0.0134587	0.0109318
410	2022-03-31 13:09:17	5523597	3.96599e-10	-1.13202e-10	9.41967e-09	-1.33149e-10	2.75161e-10	2.56996e-10	-2.26404e-13	9.37257e-09	-1.33016e-10	9.54809e-11	0.02742	-2.4156e-05	-0.014192	0.0101873
411	2022-03-31 13:09:31	5537640	2.59558e-10	-1.10816e-10	9.41967e-09	-1.28591e-10	3.59679e-10	1.68194e-10	-2.21632e-13	9.37257e-09	-1.28462e-10	1.24809e-10	0.0179453	-2.36469e-05	-0.0137062	0.0133164
412	2022-03-31 13:09:45	5551683	1.32955e-10	-1.11308e-10	9.41967e-09	-1.28397e-10	5.20161e-10	8.61548e-11	-2.22616e-13	9.37257e-09	-1.28269e-10	1.80496e-10	0.00919223	-2.37519e-05	-0.0136855	0.0192579
413	2022-03-31 13:09:59	5565727	3.68724e-11	-1.09475e-10	9.41967e-09	-1.37341e-10	6.11459e-10	2.38933e-11	-2.1895e-13	9.37257e-09	-1.37204e-10	2.12176e-10	0.00254928	-2.33607e-05	-0.0146388	0.022638
414	2022-03-31 13:10:13	5579770	-2.23707e-11	-1.08595e-10	9.41967e-09	-1.26925e-10	6.44722e-10	-1.44962e-11	-2.1719e-13	9.37257e-09	-1.26798e-10	2.23719e-10	-0.00154666	-2.31729e-05	-0.0135286	0.0238695
415	2022-03-31 13:10:27	5593813	-4.76976e-11	-1.08646e-10	9.41967e-09	-1.31536e-10	6.46196e-10	-3.0908e-11	-2.17292e-13	9.37257e-09	-1.31404e-10	2.2423e-10	-0.00329771	-2.31838e-05	-0.0140201	0.0239241
416	2022-03-31 13:10:41	5607857	-7.33041e-11	-1.13868e-10	9.41967e-09	-1.44297e-10	6.35385e-10	-4.75011e-11	-2.27736e-13	9.37257e-09	-1.44153e-10	2.20479e-10	-0.00506809	-2.42981e-05	-0.0153803	0.0235238
417	2022-03-31 13:10:55	5621900	-9.42236e-11	-1.05319e-10	9.41967e-09	-1.38524e-10	6.13025e-10	-6.10569e-11	-2.10638e-13	9.37257e-09	-1.38385e-10	2.1272e-10	-0.00651442	-2.24739e-05	-0.0147649	0.022696
418	2022-03-31 13:11:09	5635943	-9.28906e-11	-1.07417e-10	9.41967e-09	-1.46232e-10	5.92569e-10	-6.01931e-11	-2.14834e-13	9.37257e-09	-1.46086e-10	2.05621e-10	-0.00642226	-2.29216e-05	-0.0155865	0.0219386
419	2022-03-31 13:11:23	5649987	-1.05027e-10	-1.03813e-10	9.41967e-09	-1.46468e-10	5.67192e-10	-6.80575e-11	-2.07626e-13	9.37257e-09	-1.46322e-10	1.96816e-10	-0.00726135	-2.21525e-05	-0.0156117	0.0209991
420	2022-03-31 13:11:38	5664030	-1.00329e-10	-1.11605e-10	9.41967e-09	-1.41534e-10	5.45208e-10	-6.50132e-11	-2.2321e-13	9.37257e-09	-1.41392e-10	1.89187e-10	-0.00693654	-2.38152e-05	-0.0150858	0.0201852
421	2022-03-31 13:11:52	5678073	-1.04124e-10	-9.85514e-11	8.53717e-09	-1.44049e-10	5.20022e-10	-6.74724e-11	-1.97103e-13	8.49448e-09	-1.43905e-10	1.80448e-10	-0.00794308	-2.32036e-05	-0.016941	0.0212429
422	2022-03-31 13:12:06	5692117	-1.1625e-10	-1.101e-10	7.64254e-09	-1.52821e-10	4.96011e-10	-7.533e-11	-2.202e-13	7.60433e-09	-1.52668e-10	1.72116e-10	-0.0099062	-2.89572e-05	-0.0200765	0.0226339
423	2022-03-31 13:12:20	5706160	-1.15325e-10	-1.05339e-10	7.07766e-09	-1.46146e-10	4.79472e-10	-7.47306e-11	-2.10678e-13	7.04227e-09	-1.46e-10	1.66377e-10	-0.0106117	-2.99162e-05	-0.0207319	0.0236254
424	2022-03-31 13:12:34	5720203	-1.14154e-10	-1.05923e-10	6.72192e-09	-1.47629e-10	4.62157e-10	-7.39718e-11	-2.11846e-13	6.68831e-09	-1.47481e-10	1.60368e-10	-0.0110599	-3.16741e-05	-0.0220506	0.0239774
425	2022-03-31 13:12:48	5734247	-1.088e-10	-9.9739e-11	6.51894e-09	-1.44254e-10	4.48381e-10	-7.05024e-11	-1.99478e-13	6.48635e-09	-1.4411e-10	1.55588e-10	-0.0108694	-3.07535e-05	-0.0222174	0.023987
426	2022-03-31 13:13:02	5748290	-1.12638e-10	-1.1351e-10	6.36332e-09	-1.49639e-10	4.23365e-10	-7.29894e-11	-2.2702e-13	6.3315e-09	-1.49489e-10	1.46908e-10	-0.011528	-3.58556e-05	-0.0236104	0.0232026
427	2022-03-31 13:13:16	5762333	-1.14734e-10	-1.08072e-10	6.26103e-09	-1.47575e-10	4.20109e-10	-7.43476e-11	-2.16144e-13	6.22972e-09	-1.47427e-10	1.45778e-10	-0.0119343	-3.46956e-05	-0.0236652	0.0234004
428	2022-03-31 13:13:30	5776377	-1.08058e-10	-1.05186e-10	6.18788e-09	-1.48242e-10	4.05451e-10	-7.00216e-11	-2.10372e-13	6.15694e-09	-1.48094e-10	1.40691e-10	-0.0113728	-3.41683e-05	-0.0240531	0.0228509
429	2022-03-31 13:13:44	5790420	-1.24549e-10	-9.4139e-11	6.10392e-09	-1.45898e-10	4.01435e-10	-8.07078e-11	-1.88278e-13	6.0734e-09	-1.45752e-10	1.39298e-10	-0.0132887	-3.10004e-05	-0.0239984	0.0229357
430	2022-03-31 13:13:58	5804463	-1.19249e-10	-1.07653e-10	6.08387e-09	-1.4635e-10	3.83605e-10	-7.72734e-11	-2.15306e-13	6.05345e-09	-1.46204e-10	1.33111e-10	-0.0127652	-3.55675e-05	-0.0241521	0.0219893
431	2022-03-31 13:14:12	5818507	-1.14014e-10	-1.09537e-10	6.01867e-09	-1.53509e-10	3.88312e-10	-7.38811e-11	-2.19074e-13	5.98858e-09	-1.53355e-10	1.34744e-10	-0.012337	-3.6582e-05	-0.025608	0.0225002
432	2022-03-31 13:14:26	5832550	-1.16605e-10	-1.03886e-10	6.01613e-09	-1.41996e-10	3.73561e-10	-7.556e-11	-2.07772e-13	5.98605e-09	-1.41854e-10	1.29626e-10	-0.0126227	-3.47094e-05	-0.0236974	0.0216546
433	2022-03-31 13:14:40	5846593	-1.22958e-10	-9.91962e-11	5.98641e-09	-1.47489e-10	3.58212e-10	-7.96768e-11	-1.98392e-13	5.95648e-09	-1.47342e-10	1.243e-10	-0.0133765	-3.3307e-05	-0.0247363	0.020868
434	2022-03-31 13:14:54	5860637	-1.14304e-10	-1.13253e-10	5.96086e-09	-1.41609e-10	3.53927e-10	-7.4069e-11	-2.26506e-13	5.93106e-09	-1.41467e-10	1.22813e-10	-0.0124883	-3.81898e-05	-0.023852	0.0207067
435	2022-03-31 13:15:08	5874680	-1.28107e-10	-1.17318e-10	5.91836e-09	-1.51822e-10	3.48437e-10	-8.30133e-11	-2.34636e-13	5.88877e-09	-1.5167e-10	1.20908e-10	-0.0140969	-3.98447e-05	-0.0257558	0.0205319
436	2022-03-31 13:15:22	5888723	-1.2843e-10	-1.10151e-10	5.89683e-09	-1.53208e-10	3.44022e-10	-8.32226e-11	-2.20302e-13	5.86735e-09	-1.53055e-10	1.19376e-10	-0.014184	-3.75471e-05	-0.0260859	0.0203458
437	2022-03-31 13:15:36	5902767	-1.26258e-10	-1.1785e-10	5.91378e-09	-1.48231e-10	3.41964e-10	-8.18152e-11	-2.357e-13	5.88421e-09	-1.48083e-10	1.18662e-10	-0.0139042	-4.00563e-05	-0.0251661	0.0201661
438	2022-03-31 13:15:50	5916810	-1.30795e-10	-1.08544e-10	5.87713e-09	-1.56777e-10	3.30101e-10	-8.47552e-11	-2.17088e-13	5.84774e-09	-1.5662e-10	1.14545e-10	-0.0144937	-3.71234e-05	-0.026783	0.0195879
439	2022-03-31 13:16:04	5930853	-1.22775e-10	-1.07725e-10	5.87562e-09	-1.4893e-10	3.34056e-10	-7.95582e-11	-2.1545e-13	5.84624e-09	-1.48781e-10	1.15917e-10	-0.0136084	-3.68527e-05	-0.025449	0.0198277
440	2022-03-31 13:16:18	5944896	-1.30128e-10	-1.0799e-10	5.84823e-09	-1.53058e-10	3.24734e-10	-8.43229e-11	-2.1598e-13	5.81899e-09	-1.52905e-10	1.12683e-10	-0.014491	-3.71164e-05	-0.0262769	0.0193647
441	2022-03-31 13:16:32	5958940	-1.32364e-10	-1.10622e-10	5.85872e-09	-1.53757e-10	3.2673e-10	-8.57719e-11	-2.21244e-13	5.82943e-09	-1.53603e-10	1.13375e-10	-0.0147136	-3.7953e-05	-0.0263496	0.0194488
442	2022-03-31 13:16:46	5972983	-1.25549e-10	-1.12322e-10	5.87606e-09	-1.55541e-10	3.12832e-10	-8.13558e-11	-2.24644e-13	5.84668e-09	-1.55385e-10	1.08553e-10	-0.0139149	-3.84225e-05	-0.0265767	0.0185666
443	2022-03-31 13:17:01	5987027	-1.27419e-10	-1.02862e-10	5.84314e-09	-1.48446e-10	3.16049e-10	-8.25675e-11	-2.05724e-13	5.81392e-09	-1.48298e-10	1.09669e-10	-0.0142017	-3.53847e-05	-0.0255073	0.0188632
444	2022-03-31 13:17:15	6001070	-1.1711e-10	-1.02565e-10	5.82203e-09	-1.44834e-10	3.11127e-10	-7.58873e-11	-2.0513e-13	5.79292e-09	-1.44689e-10	1.07961e-10	-0.0131	-3.54105e-05	-0.0249769	0.0186367
445	2022-03-31 13:17:29	6015113	-1.12133e-10	-1.10479e-10	5.82947e-09	-1.50983e-10	3.10467e-10	-7.26622e-11	-2.20958e-13	5.80032e-09	-1.50832e-10	1.07732e-10	-0.0125273	-3.80941e-05	-0.0260041	0.0185735
446	2022-03-31 13:17:43	6029157	-1.24237e-10	-1.07346e-10	5.81562e-09	-1.49338e-10	3.05506e-10	-8.05056e-11	-2.14692e-13	5.78654e-09	-1.49189e-10	1.06011e-10	-0.0139126	-3.7102e-05	-0.025782	0.0183202
447	2022-03-31 13:17:57	6043200	-1.2414e-10	-1.16253e-10	5.80494e-09	-1.53004e-10	2.96339e-10	-8.04427e-11	-2.32506e-13	5.77592e-09	-1.52851e-10	1.0283e-10	-0.0139273	-4.02544e-05	-0.0264635	0.0178032
448	2022-03-31 13:18:11	6057243	-1.25989e-10	-1.15465e-10	5.79379e-09	-1.53187e-10	3.03471e-10	-8.16409e-11	-2.3093e-13	5.76482e-09	-1.53034e-10	1.05304e-10	-0.0141619	-4.00585e-05	-0.0265462	0.0182667
449	2022-03-31 13:18:25	6071287	-1.14895e-10	-1.03957e-10	5.81235e-09	-1.46511e-10	3.00369e-10	-7.4452e-11	-2.07914e-13	5.78329e-09	-1.46364e-10	1.04228e-10	-0.0128736	-3.59508e-05	-0.0253082	0.0180223
450	2022-03-31 13:18:39	6085330	-1.23345e-10	-1.09404e-10	5.774e-09	-1.47371e-10	2.96676e-10	-7.99276e-11	-2.18808e-13	5.74513e-09	-1.47224e-10	1.02947e-10	-0.0139122	-3.80858e-05	-0.0256258	0.0179189
451	2022-03-31 13:18:53	6099373	-1.24248e-10	-9.90629e-11	5.74671e-09	-1.51445e-10	2.84981e-10	-8.05127e-11	-1.98126e-13	5.71798e-09	-1.51294e-10	9.88884e-11	-0.0140806	-3.46496e-05	-0.0264593	0.0172943
452	2022-03-31 13:19:07	6113417	-1.2127e-10	-1.1525e-10	5.76248e-09	-1.39771e-10	2.85734e-10	-7.8583e-11	-2.305e-13	5.73367e-09	-1.39631e-10	9.91497e-11	-0.0137055	-4.02011e-05	-0.0243529	0.0172925
453	2022-03-31 13:19:21	6127460	-1.32117e-10	-1.07417e-10	5.78037e-09	-1.58508e-10	2.82348e-10	-8.56118e-11	-2.14834e-13	5.75147e-09	-1.58349e-10	9.79748e-11	-0.0148852	-3.73529e-05	-0.027532	0.0170347
454	2022-03-31 13:19:35	6141503	-1.27752e-10	-1.07848e-10	5.76828e-09	-1.5639e-10	2.72289e-10	-8.27833e-11	-2.15696e-13	5.73944e-09	-1.56234e-10	9.44843e-11	-0.0144236	-3.75814e-05	-0.0272211	0.0164623
455	2022-03-31 13:19:49	6155547	-1.37406e-10	-1.05063e-10	5.75323e-09	-1.551e-10	2.82179e-10	-8.90391e-11	-2.10126e-13	5.72446e-09	-1.54945e-10	9.79161e-11	-0.0155541	-3.67067e-05	-0.0270671	0.0171049
456	2022-03-31 13:20:03	6169590	-1.35052e-10	-1.10857e-10	5.74608e-09	-1.49467e-10	2.7771e-10	-8.75137e-11	-2.21714e-13	5.71735e-09	-1.49318e-10	9.63654e-11	-0.0153067	-3.87792e-05	-0.0261166	0.0168549
457	2022-03-31 13:20:17	6183633	-1.28634e-10	-1.20594e-10	5.74808e-09	-1.50929e-10	2.7824e-10	-8.33548e-11	-2.41188e-13	5.71934e-09	-1.50778e-10	9.65493e-11	-0.0145742	-4.21706e-05	-0.0263628	0.0168812
458	2022-03-31 13:20:31	6197676	-1.31816e-10	-1.13355e-10	5.74004e-09	-1.59314e-10	2.70592e-10	-8.54168e-11	-2.2671e-13	5.71134e-09	-1.59155e-10	9.38954e-11	-0.0149556	-3.96947e-05	-0.0278664	0.0164402
459	2022-03-31 13:20:45	6211720	-1.23474e-10	-1.03804e-10	5.72259e-09	-1.57465e-10	2.704e-10	-8.00112e-11	-2.07608e-13	5.69398e-09	-1.57308e-10	9.38288e-11	-0.0140519	-3.6461e-05	-0.027627	0.0164786
460	2022-03-31 13:20:59	6225763	-1.4234e-10	-1.08277e-10	5.71369e-09	-1.54477e-10	2.70546e-10	-9.22363e-11	-2.16554e-13	5.68512e-09	-1.54323e-10	9.38795e-11	-0.0162242	-3.80914e-05	-0.027145	0.0165132
461	2022-03-31 13:21:13	6239806	-1.30805e-10	-1.0625e-10	5.71461e-09	-1.56444e-10	2.64664e-10	-8.47616e-11	-2.125e-13	5.68604e-09	-1.56288e-10	9.18384e-11	-0.014907	-3.73723e-05	-0.0274862	0.0161516
462	2022-03-31 13:21:27	6253850	-1.39427e-10	-1.1571e-10	5.72149e-09	-1.49747e-10	2.76251e-10	-9.03487e-11	-2.3142e-13	5.69288e-09	-1.49597e-10	9.58591e-11	-0.0158705	-4.06508e-05	-0.0262779	0.0168384
463	2022-03-31 13:21:41	6267893	-1.29419e-10	-1.08339e-10	5.73728e-09	-1.5295e-10	2.64196e-10	-8.38635e-11	-2.16678e-13	5.70859e-09	-1.52797e-10	9.1676e-11	-0.0146907	-3.79565e-05	-0.0267661	0.0160593
464	2022-03-31 13:21:55	6281936	-1.26914e-10	-1.07049e-10	5.69448e-09	-1.48822e-10	2.7255e-10	-8.22403e-11	-2.14098e-13	5.66601e-09	-1.48673e-10	9.45748e-11	-0.0145147	-3.77864e-05	-0.0262395	0.0166916
465	2022-03-31 13:22:09	6295980	-1.27505e-10	-1.00435e-10	5.70465e-09	-1.55208e-10	2.63827e-10	-8.26232e-11	-2.0087e-13	5.67613e-09	-1.55053e-10	9.1548e-11	-0.0145563	-3.53886e-05	-0.0273167	0.0161286
466	2022-03-31 13:22:24	6310023	-1.28946e-10	-1.05636e-10	6.11488e-09	-1.49693e-10	2.58959e-10	-8.3557e-11	-2.11272e-13	6.08431e-09	-1.49543e-10	8.98588e-11	-0.0137332	-3.47241e-05	-0.0245785	0.0147689
467	2022-03-31 13:22:38	6324066	-1.28999e-10	-1.02298e-10	5.14849e-09	-1.44297e-10	2.73471e-10	-8.35914e-11	-2.04596e-13	5.12275e-09	-1.44153e-10	9.48944e-11	-0.0163177	-3.99387e-05	-0.0281397	0.0185241
468	2022-03-31 13:22:52	6338110	-1.23216e-10	-1.17646e-10	5.00282e-09	-1.45565e-10	2.72105e-10	-7.9844e-11	-2.35292e-13	4.97781e-09	-1.45419e-10	9.44204e-11	-0.01604	-4.72682e-05	-0.0292136	0.0189683
469	2022-03-31 13:23:06	6352153	-1.33375e-10	-1.02309e-10	4.99248e-09	-1.53155e-10	2.77349e-10	-8.6427e-11	-2.04618e-13	4.96752e-09	-1.53002e-10	9.62401e-11	-0.0173984	-4.11912e-05	-0.0308005	0.0193739
470	2022-03-31 13:23:20	6366196	-1.3316e-10	-1.06772e-10	5.17072e-09	-1.48091e-10	2.73041e-10	-8.62877e-11	-2.13544e-13	5.14487e-09	-1.47943e-10	9.47452e-11	-0.0167716	-4.15062e-05	-0.0287554	0.0184155
471	2022-03-31 13:23:34	6380239	-1.20131e-10	-9.82133e-11	5.32133e-09	-1.46081e-10	2.70984e-10	-7.78449e-11	-1.96427e-13	5.29472e-09	-1.45935e-10	9.40314e-11	-0.0147024	-3.70986e-05	-0.0275623	0.0177595
472	2022-03-31 13:23:48	6394283	-1.26043e-10	-1.17082e-10	5.38153e-09	-1.54326e-10	2.59796e-10	-8.16759e-11	-2.34164e-13	5.35462e-09	-1.54172e-10	9.01492e-11	-0.0152533	-4.37312e-05	-0.0287923	0.0168358
473	2022-03-31 13:24:02	6408326	-1.25645e-10	-1.11861e-10	7.39887e-09	-1.56659e-10	2.90825e-10	-8.1418e-11	-2.23722e-13	7.36188e-09	-1.56502e-10	1.00916e-10	-0.0110594	-3.03893e-05	-0.0212585	0.013708
474	2022-03-31 13:24:16	6422369	-1.3173e-10	-1.06589e-10	9.41967e-09	-1.44243e-10	2.90188e-10	-8.5361e-11	-2.13178e-13	9.37257e-09	-1.44099e-10	1.00695e-10	-0.00910754	-2.27449e-05	-0.0153745	0.0107436
475	2022-03-31 13:24:30	6436413	-1.24409e-10	-1.17195e-10	9.41967e-09	-1.2672e-10	2.63789e-10	-8.0617e-11	-2.3439e-13	9.37257e-09	-1.26593e-10	9.15348e-11	-0.00860138	-2.50081e-05	-0.0135068	0.00976624
476	2022-03-31 13:24:44	6450456	-1.30859e-10	-1.06598e-10	9.41967e-09	-1.35127e-10	2.41229e-10	-8.47966e-11	-2.13196e-13	9.37257e-09	-1.34992e-10	8.37065e-11	-0.00904732	-2.27468e-05	-0.0144029	0.008931
477	2022-03-31 13:24:58	6464499	-1.39137e-10	-1.07049e-10	9.41967e-09	-1.24882e-10	2.22924e-10	-9.01608e-11	-2.14098e-13	9.37257e-09	-1.24757e-10	7.73546e-11	-0.00961964	-2.2843e-05	-0.0133109	0.0082533
478	2022-03-31 13:25:12	6478543	-1.25291e-10	-1.21925e-10	9.41967e-09	-1.31375e-10	2.07574e-10	-8.11886e-11	-2.4385e-13	9.37257e-09	-1.31244e-10	7.20282e-11	-0.00866236	-2.60174e-05	-0.0140029	0.007685
479	2022-03-31 13:25:26	6492586	-1.37589e-10	-1.14308e-10	9.41967e-09	-1.24893e-10	1.93239e-10	-8.91577e-11	-2.28616e-13	9.37257e-09	-1.24768e-10	6.70539e-11	-0.00951262	-2.4392e-05	-0.013312	0.00715427
480	2022-03-31 13:25:40	6506629	-1.30967e-10	-1.29225e-10	9.41967e-09	-1.27763e-10	1.8685e-10	-8.48666e-11	-2.5845e-13	9.37257e-09	-1.27635e-10	6.48369e-11	-0.00905478	-2.75751e-05	-0.013618	0.00691773
481	2022-03-31 13:25:54	6520673	-1.40459e-10	-1.17256e-10	9.41967e-09	-1.30773e-10	1.84377e-10	-9.10174e-11	-2.34512e-13	9.37257e-09	-1.30642e-10	6.39788e-11	-0.00971104	-2.50211e-05	-0.0139388	0.00682618
482	2022-03-31 13:26:08	6534716	6.55856e-11	-1.18976e-10	9.41967e-09	-1.05865e-10	8.39629e-10	4.24995e-11	-2.37952e-13	9.37257e-09	-1.05759e-10	2.91351e-10	0.00453445	-2.53881e-05	-0.0112839	0.0310855
483	2022-03-31 13:26:22	6548759	4.24438e-09	-1.2471e-10	9.41967e-09	-5.17181e-11	1.77739e-09	2.75036e-09	-2.4942e-13	9.37257e-09	-5.16664e-11	6.16754e-10	0.293448	-2.66117e-05	-0.00551251	0.0658042
484	2022-03-31 13:26:40	6566053	7.56849e-09	-1.0709e-10	9.41967e-09	-1.94574e-11	2.15734e-09	4.90438e-09	-2.1418e-13	9.37257e-09	-1.94379e-11	7.48597e-10	0.52327	-2.28518e-05	-0.00207392	0.079871
485	2022-03-31 13:26:51	6577887	9.32414e-09	-1.10448e-10	9.41967e-09	-1.09219e-11	2.09053e-09	6.04204e-09	-2.20896e-13	9.37257e-09	-1.0911e-11	7.25414e-10	0.644652	-2.35683e-05	-0.00116414	0.0773975
486	2022-03-31 13:27:03	6589720	1.05521e-08	-1.12618e-10	9.41967e-09	-2.95624e-12	1.88014e-09	6.83776e-09	-2.25236e-13	9.37257e-09	-2.95328e-12	6.52409e-10	0.72955	-2.40314e-05	-0.000315099	0.0696083
487	2022-03-31 13:27:16	6602593	1.13808e-08	-1.20963e-10	9.41967e-09	-5.91249e-12	1.62964e-09	7.37476e-09	-2.41926e-13	9.37257e-09	-5.90658e-12	5.65485e-10	0.786845	-2.58121e-05	-0.000630198	0.060334
488	2022-03-31 13:27:27	6613897	1.19419e-08	-1.07387e-10	9.41967e-09	-7.37448e-12	1.39511e-09	7.73835e-09	-2.14774e-13	9.37257e-09	-7.36711e-12	4.84103e-10	0.825638	-2.29152e-05	-0.000786028	0.0516511
489	2022-03-31 13:27:39	6625200	1.22704e-08	-1.09128e-10	9.41967e-09	-1.25774e-11	1.22157e-09	7.95122e-09	-2.18256e-13	9.37257e-09	-1.25648e-11	4.23885e-10	0.84835	-2.32867e-05	-0.00134059	0.0452261
490	2022-03-31 13:27:50	6636503	1.24619e-08	-1.10643e-10	9.41967e-09	-1.18464e-11	1.05456e-09	8.07531e-09	-2.21286e-13	9.37257e-09	-1.18346e-11	3.65932e-10	0.86159	-2.361e-05	-0.00126268	0.0390429
491	2022-03-31 13:28:01	6647807	1.26037e-08	-1.14502e-10	9.41967e-09	-1.86942e-11	9.37057e-10	8.1672e-09	-2.29004e-13	9.37257e-09	-1.86755e-11	3.25159e-10	0.871393	-2.44334e-05	-0.00199257	0.0346926
492	2022-03-31 13:28:13	6659110	1.27387e-08	-1.09639e-10	9.41967e-09	-1.23409e-11	8.37029e-10	8.25468e-09	-2.19278e-13	9.37257e-09	-1.23286e-11	2.90449e-10	0.880727	-2.33957e-05	-0.00131539	0.0309893
493	2022-03-31 13:28:24	6670413	1.22832e-08	-1.1397e-10	9.41967e-09	-1.70602e-11	7.6355e-10	7.95951e-09	-2.2794e-13	9.37257e-09	-1.70431e-11	2.64952e-10	0.849235	-2.43199e-05	-0.00181841	0.0282689
494	2022-03-31 13:28:35	6681717	9.456e-09	-1.03373e-10	9.41967e-09	-6.19199e-11	5.6442e-10	6.12749e-09	-2.06746e-13	9.37257e-09	-6.1858e-11	1.95854e-10	0.653768	-2.20586e-05	-0.00659989	0.0208965
495	2022-03-31 13:28:47	6693530	5.54168e-09	-1.11288e-10	9.41967e-09	-8.36348e-11	4.90736e-10	3.59101e-09	-2.22576e-13	9.37257e-09	-8.35512e-11	1.70285e-10	0.38314	-2.37476e-05	-0.00891443	0.0181685
496	2022-03-31 13:28:59	6705363	3.82301e-09	-1.10387e-10	9.41967e-09	-1.01619e-10	4.38391e-10	2.47731e-09	-2.20774e-13	9.37257e-09	-1.01517e-10	1.52122e-10	0.264315	-2.35553e-05	-0.0108313	0.0162305
497	2022-03-31 13:29:11	6717197	2.68653e-09	-1.12424e-10	9.41967e-09	-1.00125e-10	3.93111e-10	1.74087e-09	-2.24848e-13	9.37257e-09	-1.00025e-10	1.3641e-10	0.185741	-2.399e-05	-0.0106721	0.0145541
498	2022-03-31 13:29:23	6729030	1.93485e-09	-1.15741e-10	9.41967e-09	-1.19991e-10	3.63718e-10	1.25378e-09	-2.31482e-13	9.37257e-09	-1.19871e-10	1.2621e-10	0.133771	-2.46978e-05	-0.0127896	0.0134659
499	2022-03-31 13:29:34	6740863	1.41345e-09	-1.18629e-10	9.41967e-09	-1.13186e-10	3.34132e-10	9.15916e-10	-2.37258e-13	9.37257e-09	-1.13073e-10	1.15944e-10	0.097723	-2.53141e-05	-0.0120642	0.0123705
500	2022-03-31 13:29:46	6752697	1.01703e-09	-1.17799e-10	9.41967e-09	-1.21808e-10	3.13746e-10	6.59035e-10	-2.35598e-13	9.37257e-09	-1.21686e-10	1.0887e-10	0.0703153	-2.5137e-05	-0.0129832	0.0116158
501	2022-03-31 13:29:59	6765571	6.74862e-10	-1.2e-10	9.41967e-09	-1.27978e-10	2.87715e-10	4.37311e-10	-2.4e-13	9.37257e-09	-1.2785e-10	9.98371e-11	0.0466585	-2.56066e-05	-0.0136409	0.0106521
502	2022-03-31 13:30:13	6779614	4.29891e-10	-1.18761e-10	9.41967e-09	-1.31601e-10	2.66968e-10	2.78569e-10	-2.37522e-13	9.37257e-09	-1.31469e-10	9.26379e-11	0.0297218	-2.53422e-05	-0.014027	0.00988394
503	2022-03-31 13:30:27	6793657	2.88981e-10	-1.1955e-10	9.41967e-09	-1.29161e-10	3.03618e-10	1.8726e-10	-2.391e-13	9.37257e-09	-1.29032e-10	1.05355e-10	0.0199795	-2.55106e-05	-0.013767	0.0112408
504	2022-03-31 13:30:41	6807701	1.58368e-10	-1.17799e-10	9.41967e-09	-1.45791e-10	4.64768e-10	1.02622e-10	-2.35598e-13	9.37257e-09	-1.45645e-10	1.61274e-10	0.0109492	-2.5137e-05	-0.0155395	0.0172071
505	2022-03-31 13:30:55	6821744	3.80119e-11	-1.2515e-10	9.41967e-09	-1.4549e-10	5.74294e-10	2.46317e-11	-2.503e-13	9.37257e-09	-1.45345e-10	1.9928e-10	0.00262806	-2.67056e-05	-0.0155074	0.021262
506	2022-03-31 13:31:09	6835787	-1.28892e-11	-1.25099e-10	9.41967e-09	-1.46479e-10	6.15943e-10	-8.3522e-12	-2.50198e-13	9.37257e-09	-1.46333e-10	2.13732e-10	-0.000891132	-2.66947e-05	-0.0156128	0.022804
507	2022-03-31 13:31:23	6849831	-4.84609e-11	-1.18362e-10	9.41967e-09	-1.49134e-10	6.34156e-10	-3.14027e-11	-2.36724e-13	9.37257e-09	-1.48985e-10	2.20052e-10	-0.00335049	-2.52571e-05	-0.0158958	0.0234783
508	2022-03-31 13:31:37	6863874	-7.55078e-11	-1.1225e-10	9.41967e-09	-1.50628e-10	6.25518e-10	-4.89291e-11	-2.245e-13	9.37257e-09	-1.50477e-10	2.17055e-10	-0.00522045	-2.39529e-05	-0.0160551	0.0231585
509	2022-03-31 13:31:51	6877917	-9.42128e-11	-1.19847e-10	9.41967e-09	-1.53434e-10	6.05907e-10	-6.10499e-11	-2.39694e-13	9.37257e-09	-1.53281e-10	2.1025e-10	-0.00651368	-2.5574e-05	-0.0163542	0.0224324
510	2022-03-31 13:32:05	6891961	-1.01952e-10	-1.15403e-10	9.41967e-09	-1.57928e-10	5.77742e-10	-6.60649e-11	-2.30806e-13	9.37257e-09	-1.5777e-10	2.00476e-10	-0.00704875	-2.46257e-05	-0.0168332	0.0213897
511	2022-03-31 13:32:20	6906004	-1.11488e-10	-1.15331e-10	9.41967e-09	-1.45995e-10	5.53263e-10	-7.22442e-11	-2.30662e-13	9.37257e-09	-1.45849e-10	1.91982e-10	-0.00770805	-2.46103e-05	-0.0155613	0.0204834
512	2022-03-31 13:32:34	6920047	-1.14594e-10	-1.05247e-10	9.41967e-09	-1.54928e-10	5.29037e-10	-7.42569e-11	-2.10494e-13	9.37257e-09	-1.54773e-10	1.83576e-10	-0.00792279	-2.24585e-05	-0.0165134	0.0195865
513	2022-03-31 13:32:48	6934091	-1.18658e-10	-1.12004e-10	8.84242e-09	-1.43028e-10	5.13265e-10	-7.68904e-11	-2.24008e-13	8.79821e-09	-1.42885e-10	1.78103e-10	-0.00873932	-2.54606e-05	-0.0162402	0.0202431
514	2022-03-31 13:33:02	6948134	-1.22066e-10	-1.09148e-10	7.84388e-09	-1.52628e-10	4.78858e-10	-7.90988e-11	-2.18296e-13	7.80466e-09	-1.52475e-10	1.66164e-10	-0.0101348	-2.797e-05	-0.0195365	0.0212903
515	2022-03-31 13:33:16	6962177	-1.13036e-10	-1.10868e-10	7.21278e-09	-1.46909e-10	4.61566e-10	-7.32473e-11	-2.21736e-13	7.17672e-09	-1.46762e-10	1.60163e-10	-0.0102062	-3.08966e-05	-0.0204498	0.0223171
516	2022-03-31 13:33:30	6976221	-1.26075e-10	-1.24371e-10	6.78232e-09	-1.56831e-10	4.4895e-10	-8.16966e-11	-2.48742e-13	6.74841e-09	-1.56674e-10	1.55786e-10	-0.0121061	-3.68594e-05	-0.0232165	0.0230848
517	2022-03-31 13:33:44	6990264	-1.17325e-10	-1.15751e-10	6.5312e-09	-1.4291e-10	4.3165e-10	-7.60266e-11	-2.31502e-13	6.49854e-09	-1.42767e-10	1.49783e-10	-0.011699	-3.56237e-05	-0.0219691	0.0230486
518	2022-03-31 13:33:58	7004307	-1.18701e-10	-1.12127e-10	6.36525e-09	-1.64195e-10	4.2047e-10	-7.69182e-11	-2.24254e-13	6.33342e-09	-1.64031e-10	1.45903e-10	-0.0121448	-3.5408e-05	-0.0258992	0.023037
519	2022-03-31 13:34:12	7018351	-1.28709e-10	-1.09332e-10	6.26998e-09	-1.57465e-10	4.02848e-10	-8.34034e-11	-2.18664e-13	6.23863e-09	-1.57308e-10	1.39788e-10	-0.0133689	-3.505e-05	-0.0252151	0.0224069
520	2022-03-31 13:34:26	7032394	-1.23678e-10	-1.17185e-10	6.1753e-09	-1.52327e-10	3.87068e-10	-8.01433e-11	-2.3437e-13	6.14442e-09	-1.52175e-10	1.34313e-10	-0.0130433	-3.81435e-05	-0.0247663	0.0218593
521	2022-03-31 13:34:40	7046437	-1.31117e-10	-1.12004e-10	6.09822e-09	-1.52445e-10	3.89986e-10	-8.49638e-11	-2.24008e-13	6.06773e-09	-1.52293e-10	1.35325e-10	-0.0140026	-3.69179e-05	-0.0250988	0.0223024
522	2022-03-31 13:34:54	7060481	-1.29816e-10	-1.17164e-10	6.07001e-09	-1.52101e-10	3.64554e-10	-8.41208e-11	-2.34328e-13	6.03966e-09	-1.51949e-10	1.265e-10	-0.0139281	-3.87982e-05	-0.0251585	0.0209449
523	2022-03-31 13:35:08	7074524	-1.27473e-10	-1.06783e-10	6.04963e-09	-1.64915e-10	3.64271e-10	-8.26025e-11	-2.13566e-13	6.01938e-09	-1.6475e-10	1.26402e-10	-0.0137228	-3.54797e-05	-0.0273699	0.0209992
524	2022-03-31 13:35:22	7088567	-1.32536e-10	-1.17748e-10	5.98865e-09	-1.50209e-10	3.51709e-10	-8.58833e-11	-2.35496e-13	5.95871e-09	-1.50059e-10	1.22043e-10	-0.0144131	-3.95213e-05	-0.0251831	0.0204815
525	2022-03-31 13:35:36	7102610	-1.27226e-10	-1.16888e-10	5.98503e-09	-1.56541e-10	3.49313e-10	-8.24424e-11	-2.33776e-13	5.9551e-09	-1.56384e-10	1.21212e-10	-0.013844	-3.92564e-05	-0.0262606	0.0203542
526	2022-03-31 13:35:50	7116654	-1.26892e-10	-1.1999e-10	5.95384e-09	-1.50714e-10	3.45734e-10	-8.2226e-11	-2.3998e-13	5.92407e-09	-1.50563e-10	1.1997e-10	-0.01388	-4.05093e-05	-0.0254155	0.0202512
527	2022-03-31 13:36:04	7130697	-1.39416e-10	-1.24535e-10	5.97161e-09	-1.58175e-10	3.36114e-10	-9.03416e-11	-2.4907e-13	5.94175e-09	-1.58017e-10	1.16632e-10	-0.0152045	-4.19186e-05	-0.0265943	0.0196292
528	2022-03-31 13:36:18	7144740	-1.30246e-10	-1.02933e-10	5.92674e-09	-1.45221e-10	3.31452e-10	-8.43994e-11	-2.05866e-13	5.89711e-09	-1.45076e-10	1.15014e-10	-0.014312	-3.49097e-05	-0.0246012	0.0195034
529	2022-03-31 13:36:32	7158784	-1.35417e-10	-1.07203e-10	5.92008e-09	-1.49854e-10	3.30385e-10	-8.77502e-11	-2.14406e-13	5.89048e-09	-1.49704e-10	1.14644e-10	-0.014897	-3.63987e-05	-0.0254146	0.0194625
530	2022-03-31 13:36:46	7172827	-1.25828e-10	-1.06783e-10	5.89246e-09	-1.67022e-10	3.25985e-10	-8.15365e-11	-2.13566e-13	5.863e-09	-1.66855e-10	1.13117e-10	-0.013907	-3.64261e-05	-0.028459	0.0192933
531	2022-03-31 13:37:00	7186870	-1.28473e-10	-1.18966e-10	5.87957e-09	-1.59981e-10	3.17815e-10	-8.32505e-11	-2.37932e-13	5.85017e-09	-1.59821e-10	1.10282e-10	-0.0142304	-4.06709e-05	-0.027319	0.018851
532	2022-03-31 13:37:14	7200914	-1.3102e-10	-1.18547e-10	5.87433e-09	-1.44426e-10	3.20042e-10	-8.4901e-11	-2.37094e-13	5.84496e-09	-1.44282e-10	1.11055e-10	-0.0145255	-4.05638e-05	-0.0246848	0.0190001
533	2022-03-31 13:37:28	7214957	-1.28021e-10	-1.10264e-10	5.85762e-09	-1.55907e-10	3.12771e-10	-8.29576e-11	-2.20528e-13	5.82833e-09	-1.55751e-10	1.08532e-10	-0.0142335	-3.78372e-05	-0.0267231	0.0186214
534	2022-03-31 13:37:43	7229000	-1.36557e-10	-1.12475e-10	5.85334e-09	-1.48779e-10	3.00907e-10	-8.84889e-11	-2.2495e-13	5.82407e-09	-1.4863e-10	1.04415e-10	-0.0151937	-3.86242e-05	-0.02552	0.0179281
535	2022-03-31 13:37:57	7243043	-1.24334e-10	-1.09117e-10	5.81938e-09	-1.49037e-10	3.03886e-10	-8.05684e-11	-2.18234e-13	5.79028e-09	-1.48888e-10	1.05448e-10	-0.0139144	-3.76897e-05	-0.0257134	0.0182113
536	2022-03-31 13:38:11	7257087	-1.422e-10	-1.15905e-10	5.82337e-09	-1.56444e-10	3.03088e-10	-9.21456e-11	-2.3181e-13	5.79425e-09	-1.56288e-10	1.05172e-10	-0.0159029	-4.00069e-05	-0.0269729	0.018151
537	2022-03-31 13:38:25	7271130	-1.36976e-10	-1.16816e-10	5.81105e-09	-1.62625e-10	2.91286e-10	-8.87604e-11	-2.33632e-13	5.78199e-09	-1.62462e-10	1.01076e-10	-0.0153512	-4.04068e-05	-0.028098	0.0174812
538	2022-03-31 13:38:39	7285173	-1.2485e-10	-1.19826e-10	5.80769e-09	-1.54219e-10	2.90188e-10	-8.09028e-11	-2.39652e-13	5.77865e-09	-1.54065e-10	1.00695e-10	-0.0140003	-4.1472e-05	-0.026661	0.0174254
539	2022-03-31 13:38:53	7299217	-1.40588e-10	-1.16827e-10	5.8042e-09	-1.50467e-10	2.88675e-10	-9.1101e-11	-2.33654e-13	5.77518e-09	-1.50317e-10	1.0017e-10	-0.0157746	-4.04583e-05	-0.026028	0.017345
540	2022-03-31 13:39:07	7313260	-1.23022e-10	-1.18946e-10	5.77337e-09	-1.53176e-10	2.85611e-10	-7.97183e-11	-2.37892e-13	5.7445e-09	-1.53023e-10	9.9107e-11	-0.0138773	-4.14121e-05	-0.0266381	0.0172525
541	2022-03-31 13:39:21	7327303	-1.32353e-10	-1.16366e-10	5.75963e-09	-1.47887e-10	2.77357e-10	-8.57647e-11	-2.32732e-13	5.73083e-09	-1.47739e-10	9.62429e-11	-0.0149655	-4.06105e-05	-0.0257797	0.0167939
542	2022-03-31 13:39:35	7341347	-1.26957e-10	-1.15004e-10	5.76757e-09	-1.60497e-10	2.81058e-10	-8.22681e-11	-2.30008e-13	5.73873e-09	-1.60337e-10	9.75271e-11	-0.0143356	-4.00799e-05	-0.0279394	0.0169945
543	2022-03-31 13:39:49	7355390	-1.35084e-10	-1.12741e-10	5.77736e-09	-1.54627e-10	2.82694e-10	-8.75344e-11	-2.25482e-13	5.74847e-09	-1.54472e-10	9.80948e-11	-0.0152274	-3.92247e-05	-0.0268719	0.0170645
544	2022-03-31 13:40:03	7369433	-1.24861e-10	-1.06087e-10	5.7636e-09	-1.46812e-10	2.76481e-10	-8.09099e-11	-2.12174e-13	5.73478e-09	-1.46665e-10	9.59389e-11	-0.0141086	-3.69977e-05	-0.0255747	0.0167293
545	2022-03-31 13:40:17	7383477	-1.22689e-10	-1.15629e-10	5.77258e-09	-1.46113e-10	2.77664e-10	-7.95025e-11	-2.31258e-13	5.74372e-09	-1.45967e-10	9.63494e-11	-0.0138416	-4.02628e-05	-0.0254133	0.0167747
546	2022-03-31 13:40:31	7397520	-1.24796e-10	-1.0319e-10	5.77132e-09	-1.51908e-10	2.74278e-10	-8.08678e-11	-2.0638e-13	5.74246e-09	-1.51756e-10	9.51745e-11	-0.0140824	-3.59393e-05	-0.026427	0.0165738
547	2022-03-31 13:40:45	7411563	-1.29107e-10	-1.10264e-10	5.75062e-09	-1.54025e-10	2.70515e-10	-8.36613e-11	-2.20528e-13	5.72187e-09	-1.53871e-10	9.38687e-11	-0.0146213	-3.85413e-05	-0.0268917	0.0164053
548	2022-03-31 13:40:59	7425607	-1.31902e-10	-1.13591e-10	5.74186e-09	-1.54799e-10	2.6901e-10	-8.54725e-11	-2.27182e-13	5.71315e-09	-1.54644e-10	9.33465e-11	-0.0149607	-3.97647e-05	-0.0270681	0.0163389
549	2022-03-31 13:41:13	7439650	-1.2772e-10	-1.1225e-10	5.76518e-09	-1.52531e-10	2.71184e-10	-8.27626e-11	-2.245e-13	5.73635e-09	-1.52378e-10	9.41008e-11	-0.0144277	-3.91364e-05	-0.0265636	0.0164043
550	2022-03-31 13:41:27	7453693	-1.47855e-10	-1.18209e-10	5.732e-09	-1.55176e-10	2.68734e-10	-9.581e-11	-2.36418e-13	5.70334e-09	-1.55021e-10	9.32507e-11	-0.0167989	-4.14526e-05	-0.0271807	0.0163502
551	2022-03-31 13:41:41	7467737	-1.31192e-10	-1.00087e-10	5.73358e-09	-1.53058e-10	2.68035e-10	-8.50124e-11	-2.00174e-13	5.70491e-09	-1.52905e-10	9.30081e-11	-0.0149016	-3.5088e-05	-0.0268023	0.0163032
552	2022-03-31 13:41:55	7481780	-1.26634e-10	-1.15588e-10	5.72847e-09	-1.58723e-10	2.66737e-10	-8.20588e-11	-2.31176e-13	5.69983e-09	-1.58564e-10	9.25577e-11	-0.0143967	-4.05584e-05	-0.0278191	0.0162387
553	2022-03-31 13:42:09	7495823	-1.32074e-10	-1.08288e-10	5.71194e-09	-1.59916e-10	2.61147e-10	-8.5584e-11	-2.16576e-13	5.68338e-09	-1.59756e-10	9.0618e-11	-0.0150586	-3.81069e-05	-0.0281093	0.0159444
554	2022-03-31 13:42:23	7509867	-1.18808e-10	-1.09751e-10	5.71699e-09	-1.59314e-10	2.52401e-10	-7.69876e-11	-2.19502e-13	5.68841e-09	-1.59155e-10	8.75831e-11	-0.0135341	-3.85876e-05	-0.0279788	0.0153968
555	2022-03-31 13:42:37	7523910	-1.36933e-10	-1.16079e-10	5.70662e-09	-1.60615e-10	2.53976e-10	-8.87326e-11	-2.32158e-13	5.67809e-09	-1.60454e-10	8.81297e-11	-0.0156272	-4.08867e-05	-0.0282585	0.015521
556	2022-03-31 13:42:51	7537953	-1.47887e-10	-1.13499e-10	5.7214e-09	-1.50897e-10	2.59574e-10	-9.58308e-11	-2.26998e-13	5.69279e-09	-1.50746e-10	9.00722e-11	-0.0168337	-3.98746e-05	-0.0264802	0.0158221
557	2022-03-31 13:43:05	7551997	-1.42448e-10	-1.13714e-10	5.70471e-09	-1.60454e-10	2.55888e-10	-9.23063e-11	-2.27428e-13	5.67619e-09	-1.60294e-10	8.87931e-11	-0.016262	-4.0067e-05	-0.0282397	0.0156431
558	2022-03-31 13:43:20	7566040	-1.3617e-10	-1.27484e-10	5.77853e-09	-1.59433e-10	2.53116e-10	-8.82382e-11	-2.54968e-13	5.74964e-09	-1.59274e-10	8.78313e-11	-0.0153467	-4.43451e-05	-0.0277015	0.015276
559	2022-03-31 13:43:34	7580083	-1.27107e-10	-1.26276e-10	5.27431e-09	-1.52488e-10	2.65102e-10	-8.23653e-11	-2.52552e-13	5.24794e-09	-1.52336e-10	9.19904e-11	-0.0156948	-4.8124e-05	-0.0290277	0.0175289
560	2022-03-31 13:43:48	7594127	-1.43028e-10	-1.11574e-10	5.01043e-09	-1.5854e-10	2.64994e-10	-9.26821e-11	-2.23148e-13	4.98538e-09	-1.58381e-10	9.19529e-11	-0.0185908	-4.47605e-05	-0.0317692	0.0184445
561	2022-03-31 13:44:02	7608170	-1.33418e-10	-1.18209e-10	4.94039e-09	-1.71182e-10	2.58759e-10	-8.64549e-11	-2.36418e-13	4.91569e-09	-1.71011e-10	8.97894e-11	-0.0175875	-4.80946e-05	-0.0347888	0.0182659
562	2022-03-31 13:44:16	7622213	-1.24044e-10	-1.09169e-10	5.12441e-09	-1.57992e-10	2.55004e-10	-8.03805e-11	-2.18338e-13	5.09879e-09	-1.57834e-10	8.84864e-11	-0.0157646	-4.28215e-05	-0.0309552	0.0173544
563	2022-03-31 13:44:30	7636257	-1.41147e-10	-1.11421e-10	5.26718e-09	-1.58067e-10	2.59128e-10	-9.14633e-11	-2.22842e-13	5.24084e-09	-1.57909e-10	8.99174e-11	-0.017452	-4.25202e-05	-0.0301304	0.017157
564	2022-03-31 13:44:44	7650300	-1.30762e-10	-1.21168e-10	5.36292e-09	-1.59261e-10	2.62146e-10	-8.47338e-11	-2.42336e-13	5.33611e-09	-1.59102e-10	9.09647e-11	-0.0158793	-4.54144e-05	-0.0298161	0.017047
565	2022-03-31 13:44:58	7664343	-1.30805e-10	-1.02513e-10	5.5812e-09	-1.55788e-10	2.64388e-10	-8.47616e-11	-2.05026e-13	5.55329e-09	-1.55632e-10	9.17426e-11	-0.0152633	-3.69197e-05	-0.0280252	0.0165204
566	2022-03-31 13:45:12	7678387	-1.34826e-10	-1.09087e-10	9.41967e-09	-1.48715e-10	2.88199e-10	-8.73672e-11	-2.18174e-13	9.37257e-09	-1.48566e-10	1.00005e-10	-0.00932159	-2.32779e-05	-0.0158512	0.01067
567	2022-03-31 13:45:26	7692430	-1.39588e-10	-1.15751e-10	9.41967e-09	-1.4721e-10	2.57807e-10	-9.0453e-11	-2.31502e-13	9.37257e-09	-1.47063e-10	8.9459e-11	-0.00965082	-2.46999e-05	-0.0156908	0.00954477
568	2022-03-31 13:45:40	7706473	-1.37137e-10	-1.1567e-10	9.41967e-09	-1.44006e-10	2.16451e-10	-8.88648e-11	-2.3134e-13	9.37257e-09	-1.43862e-10	7.51085e-11	-0.00948137	-2.46827e-05	-0.0153493	0.00801365
569	2022-03-31 13:45:54	7720517	-1.37352e-10	-1.21464e-10	9.41967e-09	-1.49102e-10	2.12135e-10	-8.90041e-11	-2.42928e-13	9.37257e-09	-1.48953e-10	7.36108e-11	-0.00949623	-2.5919e-05	-0.0158924	0.00785386
570	2022-03-31 13:46:08	7734560	-1.57143e-10	-1.24075e-10	9.41967e-09	-1.39309e-10	2.09686e-10	-1.01829e-10	-2.4815e-13	9.37257e-09	-1.3917e-10	7.2761e-11	-0.0108645	-2.64762e-05	-0.0148486	0.00776319
571	2022-03-31 13:46:22	7748603	-1.49811e-10	-1.2945e-10	9.41967e-09	-1.37535e-10	1.86619e-10	-9.70775e-11	-2.589e-13	9.37257e-09	-1.37397e-10	6.47568e-11	-0.0103576	-2.76232e-05	-0.0146595	0.00690918
572	2022-03-31 13:46:36	7762647	-1.45038e-10	-1.27587e-10	9.41967e-09	-1.34159e-10	1.74971e-10	-9.39846e-11	-2.55174e-13	9.37257e-09	-1.34025e-10	6.07149e-11	-0.0100276	-2.72256e-05	-0.0142997	0.00647794
573	2022-03-31 13:46:50	7776690	-1.41158e-10	-1.2641e-10	9.41967e-09	-1.19163e-10	1.72506e-10	-9.14704e-11	-2.5282e-13	9.37257e-09	-1.19044e-10	5.98596e-11	-0.00975937	-2.69745e-05	-0.0127013	0.00638668
574	2022-03-31 13:47:04	7790733	-1.31837e-10	-1.22856e-10	9.41967e-09	-1.18464e-10	4.89062e-10	-8.54304e-11	-2.45712e-13	9.37257e-09	-1.18346e-10	1.69705e-10	-0.00911493	-2.62161e-05	-0.0126268	0.0181065
575	2022-03-31 13:47:18	7804777	2.58628e-09	-1.11533e-10	9.41967e-09	-6.47256e-11	1.59351e-09	1.67591e-09	-2.23066e-13	9.37257e-09	-6.46609e-11	5.52948e-10	0.17881	-2.37999e-05	-0.00689895	0.0589964
576	2022-03-31 13:47:36	7822070	6.58698e-09	-1.09169e-10	9.41967e-09	-4.08284e-11	2.09044e-09	4.26836e-09	-2.18338e-13	9.37257e-09	-4.07876e-11	7.25383e-10	0.45541	-2.32954e-05	-0.0043518	0.0773942
577	2022-03-31 13:47:47	7833903	8.68642e-09	-1.18843e-10	9.41967e-09	-1.81997e-11	2.10955e-09	5.6288e-09	-2.37686e-13	9.37257e-09	-1.81815e-11	7.32014e-10	0.600561	-2.53597e-05	-0.00193986	0.0781017
578	2022-03-31 13:47:59	7845737	9.98503e-09	-9.68829e-11	9.41967e-09	-1.34159e-11	1.95307e-09	6.4703e-09	-1.93766e-13	9.37257e-09	-1.34025e-11	6.77715e-10	0.690344	-2.06737e-05	-0.00142997	0.0723084
579	2022-03-31 13:48:12	7858611	1.10906e-08	-1.1143e-10	9.41967e-09	-6.98748e-12	1.70061e-09	7.18671e-09	-2.2286e-13	9.37257e-09	-6.98049e-12	5.90112e-10	0.766781	-2.37779e-05	-0.000744779	0.0629616
580	2022-03-31 13:48:23	7869914	1.16798e-08	-1.12404e-10	9.41967e-09	-2.80574e-12	1.47256e-09	7.56851e-09	-2.24808e-13	9.37257e-09	-2.80293e-12	5.10978e-10	0.807517	-2.39857e-05	-0.000299057	0.0545185
581	2022-03-31 13:48:35	7881217	1.19936e-08	-1.05492e-10	9.41967e-09	-5.34274e-12	1.26479e-09	7.77185e-09	-2.10984e-13	9.37257e-09	-5.3374e-12	4.38882e-10	0.829212	-2.25108e-05	-0.00056947	0.0468262
582	2022-03-31 13:48:46	7892520	1.23134e-08	-1.14922e-10	9.41967e-09	-6.99823e-12	1.09536e-09	7.97908e-09	-2.29844e-13	9.37257e-09	-6.99123e-12	3.8009e-10	0.851323	-2.4523e-05	-0.000745925	0.0405534
583	2022-03-31 13:48:57	7903824	1.25613e-08	-1.2863e-10	9.41967e-09	-2.00487e-11	9.68907e-10	8.13972e-09	-2.5726e-13	9.37257e-09	-2.00287e-11	3.36211e-10	0.868462	-2.74482e-05	-0.00213694	0.0358718
584	2022-03-31 13:49:09	7915127	1.26386e-08	-1.1009e-10	9.41967e-09	-1.06209e-11	8.65714e-10	8.18981e-09	-2.2018e-13	9.37257e-09	-1.06103e-11	3.00403e-10	0.873806	-2.3492e-05	-0.00113206	0.0320513
585	2022-03-31 13:49:20	7926430	1.25621e-08	-1.1742e-10	9.41967e-09	-2.71544e-11	7.8255e-10	8.14024e-09	-2.3484e-13	9.37257e-09	-2.71272e-11	2.71545e-10	0.868517	-2.50561e-05	-0.00289432	0.0289723
586	2022-03-31 13:49:31	7937733	1.09744e-08	-1.2173e-10	9.41967e-09	-6.26294e-11	5.93521e-10	7.11141e-09	-2.4346e-13	9.37257e-09	-6.25668e-11	2.05952e-10	0.758747	-2.59758e-05	-0.00667552	0.0219739
587	2022-03-31 13:49:43	7949547	6.0718e-09	-1.1567e-10	9.41967e-09	-8.86443e-11	4.96779e-10	3.93453e-09	-2.3134e-13	9.37257e-09	-8.85557e-11	1.72382e-10	0.419792	-2.46827e-05	-0.00944838	0.0183922
588	2022-03-31 13:49:55	7961381	4.10989e-09	-1.17051e-10	9.41967e-09	-9.7599e-11	4.40381e-10	2.66321e-09	-2.34102e-13	9.37257e-09	-9.75014e-11	1.52812e-10	0.284149	-2.49773e-05	-0.0104028	0.0163042
589	2022-03-31 13:50:07	7973214	2.86797e-09	-1.16959e-10	9.41967e-09	-1.07231e-10	3.93802e-10	1.85844e-09	-2.33918e-13	9.37257e-09	-1.07124e-10	1.36649e-10	0.198285	-2.49577e-05	-0.0114295	0.0145797
590	2022-03-31 13:50:19	7985047	2.05095e-09	-1.23276e-10	9.41967e-09	-1.15508e-10	3.63165e-10	1.32902e-09	-2.46552e-13	9.37257e-09	-1.15392e-10	1.26018e-10	0.141798	-2.63057e-05	-0.0123117	0.0134454
591	2022-03-31 13:50:30	7996880	1.50057e-09	-1.16345e-10	9.41967e-09	-1.25871e-10	3.39369e-10	9.72369e-10	-2.3269e-13	9.37257e-09	-1.25745e-10	1.17761e-10	0.103746	-2.48267e-05	-0.0134163	0.0125644
592	2022-03-31 13:50:42	8008714	1.0526e-09	-1.20594e-10	9.41967e-09	-1.24968e-10	3.15511e-10	6.82085e-10	-2.41188e-13	9.37257e-09	-1.24843e-10	1.09482e-10	0.0727746	-2.57334e-05	-0.01332	0.0116811
593	2022-03-31 13:50:55	8021588	7.04209e-10	-1.17584e-10	9.41967e-09	-1.44318e-10	2.89266e-10	4.56327e-10	-2.35168e-13	9.37257e-09	-1.44174e-10	1.00375e-10	0.0486875	-2.50911e-05	-0.0153825	0.0107095
594	2022-03-31 13:51:09	8035631	4.58992e-10	-1.17973e-10	9.41967e-09	-1.2944e-10	2.69118e-10	2.97427e-10	-2.35946e-13	9.37257e-09	-1.29311e-10	9.33839e-11	0.0317337	-2.51741e-05	-0.0137967	0.00996354
595	2022-03-31 13:51:23	8049674	2.99913e-10	-1.38705e-10	9.41967e-09	-1.39255e-10	2.79338e-10	1.94344e-10	-2.7741e-13	9.37257e-09	-1.39116e-10	9.69303e-11	0.0207354	-2.95981e-05	-0.0148429	0.0103419
596	2022-03-31 13:51:37	8063718	1.63808e-10	-1.2345e-10	9.41967e-09	-1.46167e-10	4.31734e-10	1.06148e-10	-2.469e-13	9.37257e-09	-1.46021e-10	1.49812e-10	0.0113253	-2.63428e-05	-0.0155796	0.0159841
597	2022-03-31 13:51:51	8077761	5.58354e-11	-1.27781e-10	9.41967e-09	-1.51467e-10	5.5486e-10	3.61813e-11	-2.55562e-13	9.37257e-09	-1.51316e-10	1.92536e-10	0.00386034	-2.7267e-05	-0.0161445	0.0205425
598	2022-03-31 13:52:05	8091804	-8.84723e-12	-1.18802e-10	9.41967e-09	-1.64313e-10	6.15175e-10	-5.73301e-12	-2.37604e-13	9.37257e-09	-1.64149e-10	2.13466e-10	-0.000611679	-2.5351e-05	-0.0175137	0.0227756
599	2022-03-31 13:52:19	8105848	-4.63324e-11	-1.23297e-10	9.41967e-09	-1.56638e-10	6.22286e-10	-3.00234e-11	-2.46594e-13	9.37257e-09	-1.56481e-10	2.15933e-10	-0.00320333	-2.63102e-05	-0.0166957	0.0230388
600	2022-03-31 13:52:33	8119891	-6.79506e-11	-1.1227e-10	9.41967e-09	-1.60755e-10	6.19237e-10	-4.4032e-11	-2.2454e-13	9.37257e-09	-1.60594e-10	2.14875e-10	-0.00469796	-2.39571e-05	-0.0171345	0.022926
601	2022-03-31 13:52:47	8133934	-9.63091e-11	-1.10755e-10	9.41967e-09	-1.58347e-10	6.02805e-10	-6.24083e-11	-2.2151e-13	9.37257e-09	-1.58189e-10	2.09173e-10	-0.00665861	-2.36339e-05	-0.0168778	0.0223176
602	2022-03-31 13:53:01	8147978	-1.00985e-10	-1.24423e-10	9.41967e-09	-1.48919e-10	5.7388e-10	-6.54383e-11	-2.48846e-13	9.37257e-09	-1.4877e-10	1.99136e-10	-0.00698189	-2.65505e-05	-0.0158729	0.0212467
603	2022-03-31 13:53:16	8162021	-1.02533e-10	-1.16918e-10	9.41967e-09	-1.55831e-10	5.49999e-10	-6.64414e-11	-2.33836e-13	9.37257e-09	-1.55675e-10	1.9085e-10	-0.00708892	-2.4949e-05	-0.0166097	0.0203626
604	2022-03-31 13:53:30	8176064	-1.15626e-10	-1.16509e-10	9.41967e-09	-1.59884e-10	5.24806e-10	-7.49256e-11	-2.33018e-13	9.37257e-09	-1.59724e-10	1.82108e-10	-0.00799414	-2.48617e-05	-0.0170417	0.0194299
605	2022-03-31 13:53:44	8190107	-1.20421e-10	-1.10499e-10	9.06058e-09	-1.59465e-10	5.03706e-10	-7.80328e-11	-2.20998e-13	9.01528e-09	-1.59306e-10	1.74786e-10	-0.00865562	-2.45137e-05	-0.0176706	0.0193878
606	2022-03-31 13:53:58	8204151	-1.26387e-10	-1.27033e-10	7.96063e-09	-1.52241e-10	4.73391e-10	-8.18988e-11	-2.54066e-13	7.92083e-09	-1.52089e-10	1.64267e-10	-0.0103397	-3.20757e-05	-0.0192011	0.0207386
607	2022-03-31 13:54:12	8218194	-1.1912e-10	-1.24791e-10	7.28627e-09	-1.54326e-10	4.64584e-10	-7.71898e-11	-2.49582e-13	7.24984e-09	-1.54172e-10	1.61211e-10	-0.0106471	-3.44259e-05	-0.0212655	0.0222364
608	2022-03-31 13:54:26	8232237	-1.14648e-10	-1.17532e-10	6.83438e-09	-1.59992e-10	4.4392e-10	-7.42919e-11	-2.35064e-13	6.80021e-09	-1.59832e-10	1.5404e-10	-0.0109249	-3.45672e-05	-0.023504	0.0226523
609	2022-03-31 13:54:40	8246281	-1.27978e-10	-1.2255e-10	6.57312e-09	-1.48317e-10	4.23856e-10	-8.29297e-11	-2.451e-13	6.54025e-09	-1.48169e-10	1.47078e-10	-0.0126799	-3.74756e-05	-0.0226549	0.0224881
610	2022-03-31 13:54:54	8260324	-1.25721e-10	-1.14185e-10	6.3988e-09	-1.5768e-10	4.13567e-10	-8.14672e-11	-2.2837e-13	6.36681e-09	-1.57522e-10	1.43508e-10	-0.0127956	-3.58688e-05	-0.0247412	0.02254
611	2022-03-31 13:55:08	8274367	-1.37019e-10	-1.24229e-10	6.26967e-09	-1.41061e-10	4.03677e-10	-8.87883e-11	-2.48458e-13	6.23832e-09	-1.4092e-10	1.40076e-10	-0.0142327	-3.98277e-05	-0.0225894	0.0224541
612	2022-03-31 13:55:22	8288411	-1.25957e-10	-1.14338e-10	6.19712e-09	-1.61765e-10	3.86846e-10	-8.16201e-11	-2.28676e-13	6.16613e-09	-1.61603e-10	1.34236e-10	-0.0132368	-3.70858e-05	-0.0262082	0.0217698
613	2022-03-31 13:55:36	8302454	-1.20969e-10	-1.1567e-10	6.12785e-09	-1.58218e-10	3.85202e-10	-7.83879e-11	-2.3134e-13	6.09721e-09	-1.5806e-10	1.33665e-10	-0.0128564	-3.79419e-05	-0.0259233	0.0219223
614	2022-03-31 13:55:50	8316497	-1.27462e-10	-1.12495e-10	6.0907e-09	-1.64614e-10	3.76549e-10	-8.25954e-11	-2.2499e-13	6.06025e-09	-1.64449e-10	1.30663e-10	-0.013629	-3.71256e-05	-0.0271358	0.0215606
615	2022-03-31 13:56:04	8330541	-1.35632e-10	-1.24095e-10	6.04562e-09	-1.68925e-10	3.6447e-10	-8.78895e-11	-2.4819e-13	6.01539e-09	-1.68756e-10	1.26471e-10	-0.0146108	-4.12592e-05	-0.028054	0.0210246
616	2022-03-31 13:56:18	8344584	-1.2456e-10	-1.13355e-10	5.99308e-09	-1.65603e-10	3.51516e-10	-8.07149e-11	-2.2671e-13	5.96311e-09	-1.65437e-10	1.21976e-10	-0.0135357	-3.80187e-05	-0.0277435	0.0204551
617	2022-03-31 13:56:32	8358627	-1.26946e-10	-1.14133e-10	5.9694e-09	-1.647e-10	3.40889e-10	-8.2261e-11	-2.28266e-13	5.93955e-09	-1.64535e-10	1.18288e-10	-0.0138497	-3.84315e-05	-0.0277016	0.0199154
618	2022-03-31 13:56:46	8372671	-1.34751e-10	-1.20655e-10	5.94146e-09	-1.57551e-10	3.37234e-10	-8.73186e-11	-2.4131e-13	5.91175e-09	-1.57393e-10	1.1702e-10	-0.0147703	-4.08187e-05	-0.0266238	0.0197945
619	2022-03-31 13:57:00	8386714	-1.39921e-10	-1.32122e-10	5.92998e-09	-1.56949e-10	3.29486e-10	-9.06688e-11	-2.64244e-13	5.90033e-09	-1.56792e-10	1.14332e-10	-0.0153667	-4.47846e-05	-0.0265734	0.0193772
620	2022-03-31 13:57:14	8400757	-1.32085e-10	-1.26655e-10	5.93523e-09	-1.68054e-10	3.34646e-10	-8.55911e-11	-2.5331e-13	5.90555e-09	-1.67886e-10	1.16122e-10	-0.0144933	-4.28935e-05	-0.0284285	0.0196632
621	2022-03-31 13:57:28	8414801	-1.39201e-10	-1.12516e-10	5.89909e-09	-1.62131e-10	3.29379e-10	-9.02022e-11	-2.25032e-13	5.86959e-09	-1.61969e-10	1.14295e-10	-0.0153677	-3.83386e-05	-0.0275946	0.0194723
622	2022-03-31 13:57:42	8428844	-1.27064e-10	-1.15372e-10	5.8731e-09	-1.60024e-10	3.10206e-10	-8.23375e-11	-2.30744e-13	5.84373e-09	-1.59864e-10	1.07641e-10	-0.0140899	-3.94857e-05	-0.0273565	0.01842
623	2022-03-31 13:57:56	8442887	-1.40018e-10	-1.17584e-10	5.86894e-09	-1.65904e-10	3.13085e-10	-9.07317e-11	-2.35168e-13	5.8396e-09	-1.65738e-10	1.0864e-10	-0.0155373	-4.02713e-05	-0.0283818	0.0186041
624	2022-03-31 13:58:10	8456931	-1.33267e-10	-1.23399e-10	5.84099e-09	-1.55756e-10	3.04739e-10	-8.6357e-11	-2.46798e-13	5.81179e-09	-1.556e-10	1.05744e-10	-0.0148589	-4.24651e-05	-0.0267732	0.0181948
625	2022-03-31 13:58:24	8470974	-1.33622e-10	-1.2173e-10	5.82734e-09	-1.62733e-10	2.99847e-10	-8.65871e-11	-2.4346e-13	5.7982e-09	-1.6257e-10	1.04047e-10	-0.0149334	-4.19889e-05	-0.028038	0.0179447
626	2022-03-31 13:58:39	8485017	-1.35578e-10	-1.07387e-10	5.84285e-09	-1.57766e-10	2.95486e-10	-8.78545e-11	-2.14774e-13	5.81364e-09	-1.57608e-10	1.02534e-10	-0.0151118	-3.69431e-05	-0.0271101	0.0176368
627	2022-03-31 13:58:53	8499060	-1.37245e-10	-1.26205e-10	5.81589e-09	-1.5237e-10	2.94534e-10	-8.89348e-11	-2.5241e-13	5.78681e-09	-1.52218e-10	1.02203e-10	-0.0153685	-4.36182e-05	-0.0263042	0.0176614
628	2022-03-31 13:59:07	8513104	-1.32009e-10	-1.19181e-10	5.82158e-09	-1.62969e-10	2.8621e-10	-8.55418e-11	-2.38362e-13	5.79247e-09	-1.62806e-10	9.93149e-11	-0.0147678	-4.11503e-05	-0.0281065	0.0171455
629	2022-03-31 13:59:21	8527147	-1.39395e-10	-1.2213e-10	5.80133e-09	-1.7015e-10	2.90979e-10	-9.0328e-11	-2.4426e-13	5.77232e-09	-1.6998e-10	1.0097e-10	-0.0156485	-4.23157e-05	-0.0294474	0.017492
630	2022-03-31 13:59:35	8541190	-1.43544e-10	-1.19703e-10	5.78663e-09	-1.62313e-10	2.82709e-10	-9.30165e-11	-2.39406e-13	5.7577e-09	-1.62151e-10	9.81e-11	-0.0161552	-4.15802e-05	-0.0281624	0.0170381
631	2022-03-31 13:59:49	8555234	-1.47274e-10	-1.09158e-10	5.79376e-09	-1.61163e-10	2.98158e-10	-9.54336e-11	-2.18316e-13	5.76479e-09	-1.61002e-10	1.03461e-10	-0.0165546	-3.78706e-05	-0.0279285	0.017947
632	2022-03-31 14:00:03	8569277	-1.43469e-10	-1.1697e-10	5.78566e-09	-1.63743e-10	2.77495e-10	-9.29679e-11	-2.3394e-13	5.75673e-09	-1.63579e-10	9.62908e-11	-0.0161494	-4.06376e-05	-0.0284153	0.0167266
633	2022-03-31 14:00:17	8583320	-1.43222e-10	-1.2388e-10	5.76612e-09	-1.57465e-10	2.74431e-10	-9.28079e-11	-2.4776e-13	5.73729e-09	-1.57308e-10	9.52276e-11	-0.0161763	-4.31842e-05	-0.0274184	0.016598
634	2022-03-31 14:00:31	8597364	-1.37954e-10	-1.18351e-10	5.75932e-09	-1.62948e-10	2.71014e-10	-8.93942e-11	-2.36702e-13	5.73052e-09	-1.62785e-10	9.40419e-11	-0.0155997	-4.13055e-05	-0.0284067	0.0164107
635	2022-03-31 14:00:45	8611407	-1.49897e-10	-1.20185e-10	5.7582e-09	-1.65571e-10	2.75944e-10	-9.71333e-11	-2.4037e-13	5.72941e-09	-1.65405e-10	9.57526e-11	-0.0169535	-4.19537e-05	-0.0288695	0.0167125
636	2022-03-31 14:00:59	8625450	-1.40728e-10	-1.30412e-10	5.72213e-09	-1.59916e-10	2.64564e-10	-9.11917e-11	-2.60824e-13	5.69352e-09	-1.59756e-10	9.18037e-11	-0.0160168	-4.58107e-05	-0.0280593	0.0161242
637	2022-03-31 14:01:13	8639494	-1.45941e-10	-1.22733e-10	5.75213e-09	-1.65861e-10	2.68127e-10	-9.45698e-11	-2.45466e-13	5.72337e-09	-1.65695e-10	9.30401e-11	-0.0165234	-4.28884e-05	-0.0289506	0.0162562
638	2022-03-31 14:01:27	8653537	-1.45017e-10	-1.13469e-10	5.72355e-09	-1.6742e-10	2.65156e-10	-9.3971e-11	-2.26938e-13	5.69493e-09	-1.67253e-10	9.20091e-11	-0.0165008	-3.98491e-05	-0.0293687	0.0161563
639	2022-03-31 14:01:41	8667580	-1.43469e-10	-1.20563e-10	5.72937e-09	-1.67785e-10	2.59021e-10	-9.29679e-11	-2.41126e-13	5.70072e-09	-1.67617e-10	8.98803e-11	-0.0163081	-4.22974e-05	-0.0294028	0.0157665
640	2022-03-31 14:01:55	8681624	-1.40685e-10	-1.20799e-10	5.70921e-09	-1.62335e-10	2.61401e-10	-9.11639e-11	-2.41598e-13	5.68066e-09	-1.62173e-10	9.07061e-11	-0.0160481	-4.25299e-05	-0.0285482	0.0159675
641	2022-03-31 14:02:09	8695667	-1.43662e-10	-1.29736e-10	5.71759e-09	-1.57992e-10	2.52724e-10	-9.3093e-11	-2.59472e-13	5.689e-09	-1.57834e-10	8.76952e-11	-0.0163637	-4.56094e-05	-0.0277437	0.0154149
642	2022-03-31 14:02:23	8709710	-1.40061e-10	-1.20952e-10	5.72468e-09	-1.61378e-10	2.52225e-10	-9.07595e-11	-2.41904e-13	5.69606e-09	-1.61217e-10	8.75221e-11	-0.0159337	-4.24687e-05	-0.0283032	0.0153654
643	2022-03-31 14:02:37	8723754	-1.46597e-10	-1.14687e-10	5.72033e-09	-1.6929e-10	2.60625e-10	-9.49949e-11	-2.29374e-13	5.69173e-09	-1.69121e-10	9.04369e-11	-0.01669	-4.02995e-05	-0.0297134	0.0158892
644	2022-03-31 14:02:51	8737797	-1.47274e-10	-1.1826e-10	5.7207e-09	-1.64979e-10	2.51611e-10	-9.54336e-11	-2.3652e-13	5.6921e-09	-1.64814e-10	8.7309e-11	-0.016766	-4.15524e-05	-0.0289549	0.0153386
645	2022-03-31 14:03:05	8751840	-1.38556e-10	-1.20819e-10	5.71304e-09	-1.67011e-10	2.48117e-10	-8.97843e-11	-2.41638e-13	5.68447e-09	-1.66844e-10	8.60966e-11	-0.0157946	-4.25084e-05	-0.0293508	0.0151459
646	2022-03-31 14:03:19	8765884	-1.44254e-10	-1.36627e-10	5.72412e-09	-1.65281e-10	2.47664e-10	-9.34766e-11	-2.73254e-13	5.6955e-09	-1.65116e-10	8.59394e-11	-0.0164124	-4.79772e-05	-0.0289906	0.015089
647	2022-03-31 14:03:33	8779927	-1.34063e-10	-1.23511e-10	5.71548e-09	-1.75579e-10	2.42834e-10	-8.68728e-11	-2.47022e-13	5.6869e-09	-1.75403e-10	8.42634e-11	-0.0152759	-4.3437e-05	-0.0308434	0.0148171
648	2022-03-31 14:03:47	8793970	-1.49005e-10	-1.26491e-10	5.6902e-09	-1.6413e-10	2.46197e-10	-9.65552e-11	-2.52982e-13	5.66175e-09	-1.63966e-10	8.54304e-11	-0.017054	-4.46827e-05	-0.0289603	0.015089
649	2022-03-31 14:04:02	8808013	-1.36578e-10	-1.20123e-10	5.70851e-09	-1.59755e-10	2.42174e-10	-8.85025e-11	-2.40246e-13	5.67997e-09	-1.59595e-10	8.40344e-11	-0.0155815	-4.22971e-05	-0.0280979	0.0147949
650	2022-03-31 14:04:16	8822057	-1.44103e-10	-1.22826e-10	5.71307e-09	-1.71935e-10	2.3329e-10	-9.33787e-11	-2.45652e-13	5.6845e-09	-1.71763e-10	8.09516e-11	-0.0164269	-4.32143e-05	-0.030216	0.0142408
651	2022-03-31 14:04:30	8836100	-1.39298e-10	-1.31406e-10	5.73081e-09	-1.65237e-10	2.56271e-10	-9.02651e-11	-2.62812e-13	5.70216e-09	-1.65072e-10	8.8926e-11	-0.01583	-4.60899e-05	-0.028949	0.0155952
652	2022-03-31 14:04:44	8850143	-1.43931e-10	-1.21341e-10	5.0519e-09	-1.65646e-10	2.59543e-10	-9.32673e-11	-2.42682e-13	5.02664e-09	-1.6548e-10	9.00614e-11	-0.0185546	-4.82792e-05	-0.0329207	0.0179168
653	2022-03-31 14:04:58	8864187	-1.45963e-10	-1.17349e-10	4.96563e-09	-1.6556e-10	2.56356e-10	-9.4584e-11	-2.34698e-13	4.9408e-09	-1.65394e-10	8.89555e-11	-0.0191435	-4.7502e-05	-0.0334752	0.0180043
654	2022-03-31 14:05:12	8878230	-1.38986e-10	-1.26e-10	5.03897e-09	-1.64636e-10	2.42542e-10	-9.00629e-11	-2.52e-13	5.01378e-09	-1.64471e-10	8.41621e-11	-0.0179631	-5.02615e-05	-0.0328039	0.0167862
655	2022-03-31 14:05:26	8892273	-1.51284e-10	-1.28692e-10	5.23878e-09	-1.70956e-10	2.45521e-10	-9.8032e-11	-2.57384e-13	5.21259e-09	-1.70785e-10	8.51958e-11	-0.0188068	-4.93774e-05	-0.032764	0.0163442
656	2022-03-31 14:05:40	8906317	-1.41889e-10	-1.21351e-10	5.32118e-09	-1.57766e-10	2.43095e-10	-9.19441e-11	-2.42702e-13	5.29457e-09	-1.57608e-10	8.4354e-11	-0.0173657	-4.58398e-05	-0.0297679	0.0159322
657	2022-03-31 14:05:54	8920360	-1.45511e-10	-1.33044e-10	5.40636e-09	-1.57035e-10	2.53584e-10	-9.42911e-11	-2.66088e-13	5.37933e-09	-1.56878e-10	8.79936e-11	-0.0175284	-4.94649e-05	-0.0291631	0.0163577
658	2022-03-31 14:06:08	8934403	-1.50618e-10	-1.23164e-10	9.41967e-09	-1.5997e-10	2.8664e-10	-9.76005e-11	-2.46328e-13	9.37257e-09	-1.5981e-10	9.94641e-11	-0.0104134	-2.62818e-05	-0.0170508	0.0106123
659	2022-03-31 14:06:22	8948447	-1.42405e-10	-1.2771e-10	9.41967e-09	-1.58745e-10	2.59596e-10	-9.22784e-11	-2.5542e-13	9.37257e-09	-1.58586e-10	9.00798e-11	-0.00984558	-2.72519e-05	-0.0169202	0.009611
660	2022-03-31 14:06:36	8962490	-1.45823e-10	-1.21649e-10	9.41967e-09	-1.51048e-10	2.3018e-10	-9.44933e-11	-2.43298e-13	9.37257e-09	-1.50897e-10	7.98725e-11	-0.0100819	-2.59585e-05	-0.0160998	0.00852194
661	2022-03-31 14:06:50	8976533	-1.41383e-10	-1.25007e-10	9.41967e-09	-1.38642e-10	2.10377e-10	-9.16162e-11	-2.50014e-13	9.37257e-09	-1.38503e-10	7.30008e-11	-0.00977492	-2.66751e-05	-0.0147775	0.00778877
662	2022-03-31 14:07:04	8990577	-1.49704e-10	-1.316e-10	9.41967e-09	-1.47339e-10	2.00471e-10	-9.70082e-11	-2.632e-13	9.37257e-09	-1.47192e-10	6.95634e-11	-0.0103502	-2.80819e-05	-0.0157045	0.00742202
663	2022-03-31 14:07:18	9004620	-1.3761e-10	-1.39801e-10	9.41967e-09	-1.39631e-10	1.90029e-10	-8.91713e-11	-2.79602e-13	9.37257e-09	-1.39491e-10	6.59401e-11	-0.00951407	-2.98319e-05	-0.0148829	0.00703543
664	2022-03-31 14:07:32	9018663	-1.53445e-10	-1.22069e-10	9.41967e-09	-1.45705e-10	1.80039e-10	-9.94324e-11	-2.44138e-13	9.37257e-09	-1.45559e-10	6.24735e-11	-0.0106089	-2.60481e-05	-0.0155303	0.00666557
665	2022-03-31 14:07:46	9032707	-1.43394e-10	-1.2341e-10	9.41967e-09	-1.36019e-10	1.7117e-10	-9.29193e-11	-2.4682e-13	9.37257e-09	-1.35883e-10	5.9396e-11	-0.00991396	-2.63343e-05	-0.0144979	0.00633721
666	2022-03-31 14:08:00	9046750	-1.52391e-10	-1.33381e-10	9.41967e-09	-1.32708e-10	2.57024e-10	-9.87494e-11	-2.66762e-13	9.37257e-09	-1.32575e-10	8.91873e-11	-0.010536	-2.8462e-05	-0.014145	0.00951578
667	2022-03-31 14:08:14	9060793	1.07621e-09	-1.31559e-10	9.41967e-09	-9.23746e-11	1.32004e-09	6.97384e-10	-2.63118e-13	9.37257e-09	-9.22822e-11	4.58054e-10	0.0744069	-2.80732e-05	-0.00984599	0.0488717
668	2022-03-31 14:08:32	9078087	5.75306e-09	-1.19498e-10	9.41967e-09	-5.36639e-11	1.98913e-09	3.72798e-09	-2.38996e-13	9.37257e-09	-5.36102e-11	6.90228e-10	0.397755	-2.54995e-05	-0.00571991	0.0736434
669	2022-03-31 14:08:43	9089921	7.90631e-09	-1.101e-10	9.41967e-09	-3.12609e-11	2.1219e-09	5.12329e-09	-2.202e-13	9.37257e-09	-3.12296e-11	7.36299e-10	0.546626	-2.34941e-05	-0.00333202	0.0785589
670	2022-03-31 14:08:55	9101754	9.46082e-09	-1.19806e-10	9.41967e-09	-1.73612e-11	2.01284e-09	6.13061e-09	-2.39612e-13	9.37257e-09	-1.73438e-11	6.98455e-10	0.654101	-2.55652e-05	-0.00185049	0.0745212
671	2022-03-31 14:09:08	9114628	1.07453e-08	-1.15649e-10	9.41967e-09	-9.95448e-12	1.77832e-09	6.96295e-09	-2.31298e-13	9.37257e-09	-9.94453e-12	6.17077e-10	0.742908	-2.46782e-05	-0.00106102	0.0658386
672	2022-03-31 14:09:19	9125931	1.1399e-08	-1.13437e-10	9.41967e-09	-7.68623e-12	1.54344e-09	7.38655e-09	-2.26874e-13	9.37257e-09	-7.67854e-12	5.35574e-10	0.788103	-2.42062e-05	-0.000819257	0.0571427
673	2022-03-31 14:09:31	9137234	1.18108e-08	-1.26778e-10	9.41967e-09	-1.91672e-11	1.33598e-09	7.6534e-09	-2.53556e-13	9.37257e-09	-1.9148e-11	4.63585e-10	0.816574	-2.7053e-05	-0.00204299	0.0494619
674	2022-03-31 14:09:42	9148538	1.22046e-08	-1.18853e-10	9.41967e-09	-2.67137e-11	1.15364e-09	7.90858e-09	-2.37706e-13	9.37257e-09	-2.6687e-11	4.00313e-10	0.843801	-2.53619e-05	-0.00284735	0.0427111
675	2022-03-31 14:09:53	9159841	1.238e-08	-1.2001e-10	9.41967e-09	-2.13817e-11	1.00504e-09	8.02224e-09	-2.4002e-13	9.37257e-09	-2.13603e-11	3.48749e-10	0.855927	-2.56088e-05	-0.00227902	0.0372095
676	2022-03-31 14:10:05	9171144	1.24908e-08	-1.25539e-10	9.41967e-09	-2.62837e-11	8.93486e-10	8.09404e-09	-2.51078e-13	9.37257e-09	-2.62574e-11	3.1004e-10	0.863588	-2.67886e-05	-0.00280152	0.0330795
677	2022-03-31 14:10:16	9182447	1.27327e-08	-1.2732e-10	9.41967e-09	-2.90464e-11	7.93036e-10	8.25079e-09	-2.5464e-13	9.37257e-09	-2.90174e-11	2.75183e-10	0.880312	-2.71686e-05	-0.00309599	0.0293605
678	2022-03-31 14:10:27	9193750	1.11887e-08	-1.16786e-10	9.41967e-09	-3.95599e-11	6.50965e-10	7.25028e-09	-2.33572e-13	9.37257e-09	-3.95203e-11	2.25885e-10	0.773563	-2.49208e-05	-0.0042166	0.0241006
679	2022-03-31 14:10:39	9205564	7.03437e-09	-1.2561e-10	9.41967e-09	-8.94721e-11	5.22771e-10	4.55827e-09	-2.5122e-13	9.37257e-09	-8.93826e-11	1.81402e-10	0.486342	-2.68037e-05	-0.00953662	0.0193545
680	2022-03-31 14:10:51	9217398	4.57534e-09	-1.27136e-10	9.41967e-09	-9.84375e-11	4.56121e-10	2.96482e-09	-2.54272e-13	9.37257e-09	-9.83391e-11	1.58274e-10	0.316329	-2.71294e-05	-0.0104922	0.0168869
681	2022-03-31 14:11:03	9229231	3.17144e-09	-1.2341e-10	9.41967e-09	-1.14831e-10	4.12216e-10	2.05509e-09	-2.4682e-13	9.37257e-09	-1.14716e-10	1.43039e-10	0.219267	-2.63343e-05	-0.0122396	0.0152614
682	2022-03-31 14:11:15	9241064	2.22403e-09	-1.26665e-10	9.41967e-09	-1.18507e-10	3.72011e-10	1.44117e-09	-2.5333e-13	9.37257e-09	-1.18388e-10	1.29088e-10	0.153765	-2.70289e-05	-0.0126314	0.0137729
683	2022-03-31 14:11:26	9252898	1.62121e-09	-1.30669e-10	9.41967e-09	-1.17002e-10	3.51631e-10	1.05054e-09	-2.61338e-13	9.37257e-09	-1.16885e-10	1.22016e-10	0.112087	-2.78833e-05	-0.012471	0.0130184
684	2022-03-31 14:11:38	9264731	1.1895e-09	-1.2817e-10	9.41967e-09	-1.38739e-10	3.17777e-10	7.70796e-10	-2.5634e-13	9.37257e-09	-1.386e-10	1.10269e-10	0.0822395	-2.735e-05	-0.0147879	0.011765
685	2022-03-31 14:11:51	9277605	7.85845e-10	-1.37508e-10	9.41967e-09	-1.31246e-10	2.96484e-10	5.09228e-10	-2.75016e-13	9.37257e-09	-1.31115e-10	1.0288e-10	0.0543317	-2.93426e-05	-0.0139892	0.0109767
686	2022-03-31 14:12:05	9291648	5.20729e-10	-1.30893e-10	9.41967e-09	-1.38481e-10	2.80474e-10	3.37432e-10	-2.61786e-13	9.37257e-09	-1.38343e-10	9.73245e-11	0.0360021	-2.79311e-05	-0.0147604	0.010384
687	2022-03-31 14:12:19	9305692	3.41989e-10	-1.35838e-10	9.41967e-09	-1.32504e-10	2.65539e-10	2.21609e-10	-2.71676e-13	9.37257e-09	-1.32371e-10	9.2142e-11	0.0236444	-2.89863e-05	-0.0141233	0.00983103
688	2022-03-31 14:12:33	9319735	2.06206e-10	-1.38122e-10	9.41967e-09	-1.32654e-10	3.82315e-10	1.33621e-10	-2.76244e-13	9.37257e-09	-1.32521e-10	1.32663e-10	0.0142567	-2.94737e-05	-0.0141393	0.0141544
689	2022-03-31 14:12:47	9333778	8.09043e-11	-1.28467e-10	9.41967e-09	-1.60669e-10	5.20015e-10	5.2426e-11	-2.56934e-13	9.37257e-09	-1.60508e-10	1.80445e-10	0.00559355	-2.74134e-05	-0.0171253	0.0192525
690	2022-03-31 14:13:01	9347822	1.31149e-12	-1.2772e-10	9.41967e-09	-1.43028e-10	5.96424e-10	8.49846e-13	-2.5544e-13	9.37257e-09	-1.42885e-10	2.06959e-10	9.06737e-05	-2.7254e-05	-0.015245	0.0220814
691	2022-03-31 14:13:15	9361865	-5.22771e-11	-1.17226e-10	9.41967e-09	-1.59895e-10	6.26378e-10	-3.38756e-11	-2.34452e-13	9.37257e-09	-1.59735e-10	2.17353e-10	-0.00361433	-2.50147e-05	-0.0170428	0.0231903
692	2022-03-31 14:13:29	9375908	-7.50671e-11	-1.19407e-10	9.41967e-09	-1.49102e-10	6.23269e-10	-4.86435e-11	-2.38814e-13	9.37257e-09	-1.48953e-10	2.16274e-10	-0.00518998	-2.54801e-05	-0.0158924	0.0230752
693	2022-03-31 14:13:43	9389952	-9.48578e-11	-1.25386e-10	9.41967e-09	-1.65098e-10	6.0292e-10	-6.14679e-11	-2.50772e-13	9.37257e-09	-1.64933e-10	2.09213e-10	-0.00655827	-2.67559e-05	-0.0175974	0.0223219
694	2022-03-31 14:13:57	9403995	-9.90503e-11	-1.21638e-10	9.41967e-09	-1.58411e-10	5.80606e-10	-6.41846e-11	-2.43276e-13	9.37257e-09	-1.58253e-10	2.0147e-10	-0.00684813	-2.59562e-05	-0.0168846	0.0214957
695	2022-03-31 14:14:12	9418038	-1.18862e-10	-1.20563e-10	9.41967e-09	-1.66882e-10	5.53494e-10	-7.70226e-11	-2.41126e-13	9.37257e-09	-1.66715e-10	1.92062e-10	-0.00821787	-2.57268e-05	-0.0177876	0.020492
696	2022-03-31 14:14:26	9432081	-1.25151e-10	-1.26307e-10	9.41967e-09	-1.64732e-10	5.3164e-10	-8.10978e-11	-2.52614e-13	9.37257e-09	-1.64567e-10	1.84479e-10	-0.00865268	-2.69525e-05	-0.0175584	0.0196829
697	2022-03-31 14:14:40	9446125	-1.22001e-10	-1.17789e-10	9.41967e-09	-1.57519e-10	5.08266e-10	-7.90566e-11	-2.35578e-13	9.37257e-09	-1.57361e-10	1.76368e-10	-0.00843489	-2.51348e-05	-0.0167896	0.0188175
698	2022-03-31 14:14:54	9460168	-1.36847e-10	-1.34047e-10	8.22921e-09	-1.55778e-10	4.83158e-10	-8.86769e-11	-2.68094e-13	8.18806e-09	-1.55622e-10	1.67656e-10	-0.01083	-3.27421e-05	-0.019006	0.0204756
699	2022-03-31 14:15:08	9474211	-1.30547e-10	-1.24392e-10	7.45333e-09	-1.66441e-10	4.64138e-10	-8.45945e-11	-2.48784e-13	7.41606e-09	-1.66275e-10	1.61056e-10	-0.0114069	-3.35466e-05	-0.0224209	0.0217172
700	2022-03-31 14:15:22	9488255	-1.33579e-10	-1.19304e-10	6.96757e-09	-1.53208e-10	4.47606e-10	-8.65592e-11	-2.38608e-13	6.93273e-09	-1.53055e-10	1.55319e-10	-0.0124856	-3.44176e-05	-0.0220771	0.0224038
701	2022-03-31 14:15:36	9502298	-1.38223e-10	-1.32102e-10	6.65065e-09	-1.60895e-10	4.21836e-10	-8.95685e-11	-2.64204e-13	6.6174e-09	-1.60734e-10	1.46377e-10	-0.0135353	-3.99257e-05	-0.0242896	0.02212
702	2022-03-31 14:15:50	9516341	-1.41523e-10	-1.29809e-10	6.46275e-09	-1.61303e-10	4.10365e-10	-9.17069e-11	-2.59618e-13	6.43044e-09	-1.61142e-10	1.42397e-10	-0.0142614	-4.03733e-05	-0.0250592	0.0221442
703	2022-03-31 14:16:04	9530385	-1.41007e-10	-1.18771e-10	6.31151e-09	-1.66613e-10	3.9477e-10	-9.13725e-11	-2.37542e-13	6.27995e-09	-1.66446e-10	1.36985e-10	-0.0145499	-3.78254e-05	-0.0265044	0.0218131
704	2022-03-31 14:16:18	9544428	-1.29419e-10	-1.23768e-10	6.2109e-09	-1.63883e-10	3.84772e-10	-8.38635e-11	-2.47536e-13	6.17985e-09	-1.63719e-10	1.33516e-10	-0.0135705	-4.00554e-05	-0.0264924	0.0216051
705	2022-03-31 14:16:32	9558471	-1.34579e-10	-1.21034e-10	6.16133e-09	-1.7e-10	3.75819e-10	-8.72072e-11	-2.42068e-13	6.13052e-09	-1.6983e-10	1.30409e-10	-0.0142251	-3.94857e-05	-0.0277024	0.0212721
706	2022-03-31 14:16:46	9572515	-1.30547e-10	-1.29132e-10	6.08872e-09	-1.647e-10	3.73424e-10	-8.45945e-11	-2.58264e-13	6.05828e-09	-1.64535e-10	1.29578e-10	-0.0139635	-4.26299e-05	-0.0271588	0.0213886
707	2022-03-31 14:17:00	9586558	-1.37202e-10	-1.20799e-10	6.05425e-09	-1.7086e-10	3.66943e-10	-8.89069e-11	-2.41598e-13	6.02398e-09	-1.70689e-10	1.27329e-10	-0.0147588	-4.01061e-05	-0.028335	0.0211371
708	2022-03-31 14:17:14	9600601	-1.528e-10	-1.19816e-10	6.01953e-09	-1.6513e-10	3.45189e-10	-9.90144e-11	-2.39632e-13	5.98943e-09	-1.64965e-10	1.19781e-10	-0.0165315	-4.00091e-05	-0.0275427	0.0199987
709	2022-03-31 14:17:28	9614645	-1.38653e-10	-1.31825e-10	5.97717e-09	-1.64883e-10	3.36544e-10	-8.98471e-11	-2.6365e-13	5.94728e-09	-1.64718e-10	1.16781e-10	-0.0151073	-4.43312e-05	-0.0276964	0.019636
710	2022-03-31 14:17:42	9628688	-1.44544e-10	-1.29716e-10	5.95576e-09	-1.59766e-10	3.36958e-10	-9.36645e-11	-2.59432e-13	5.92598e-09	-1.59606e-10	1.16924e-10	-0.0158057	-4.37787e-05	-0.0269333	0.0197308
711	2022-03-31 14:17:56	9642731	-1.3589e-10	-1.1873e-10	5.93784e-09	-1.60368e-10	3.31038e-10	-8.80567e-11	-2.3746e-13	5.90815e-09	-1.60208e-10	1.1487e-10	-0.0149043	-4.01919e-05	-0.0271164	0.0194427
712	2022-03-31 14:18:10	9656774	-1.47565e-10	-1.2471e-10	5.89617e-09	-1.63829e-10	3.14859e-10	-9.56221e-11	-2.4942e-13	5.86669e-09	-1.63665e-10	1.09256e-10	-0.0162992	-4.25146e-05	-0.0278974	0.0186231
713	2022-03-31 14:18:24	9670818	-1.33299e-10	-1.22078e-10	5.88959e-09	-1.65807e-10	3.09745e-10	-8.63778e-11	-2.44156e-13	5.86014e-09	-1.65641e-10	1.07482e-10	-0.0147399	-4.16638e-05	-0.0282657	0.0183411
714	2022-03-31 14:18:38	9684861	-1.41996e-10	-1.24371e-10	5.89038e-09	-1.69161e-10	3.03733e-10	-9.20134e-11	-2.48742e-13	5.86093e-09	-1.68992e-10	1.05395e-10	-0.0156995	-4.24407e-05	-0.0288336	0.0179827
715	2022-03-31 14:18:52	9698904	-1.39448e-10	-1.38409e-10	5.88017e-09	-1.65195e-10	2.99939e-10	-9.03623e-11	-2.76818e-13	5.85077e-09	-1.6503e-10	1.04079e-10	-0.0154445	-4.73131e-05	-0.0282065	0.0177889
716	2022-03-31 14:19:06	9712948	-1.4993e-10	-1.24617e-10	5.89985e-09	-1.65968e-10	2.97298e-10	-9.71546e-11	-2.49234e-13	5.87035e-09	-1.65802e-10	1.03162e-10	-0.0165501	-4.24564e-05	-0.028244	0.0175735
717	2022-03-31 14:19:20	9726991	-1.36825e-10	-1.2513e-10	5.85451e-09	-1.69312e-10	2.93743e-10	-8.86626e-11	-2.5026e-13	5.82524e-09	-1.69143e-10	1.01929e-10	-0.0152204	-4.29613e-05	-0.0290362	0.0174978
718	2022-03-31 14:19:35	9741034	-1.44006e-10	-1.22447e-10	5.85132e-09	-1.63528e-10	3.02789e-10	-9.33159e-11	-2.44894e-13	5.82206e-09	-1.63364e-10	1.05068e-10	-0.016028	-4.20631e-05	-0.0280595	0.0180465
719	2022-03-31 14:19:49	9755078	-1.40609e-10	-1.28559e-10	5.84205e-09	-1.65678e-10	2.921e-10	-9.11146e-11	-2.57118e-13	5.81284e-09	-1.65512e-10	1.01359e-10	-0.0156747	-4.42328e-05	-0.0284736	0.017437
720	2022-03-31 14:20:03	9769121	-1.55369e-10	-1.22048e-10	5.82838e-09	-1.7201e-10	2.82763e-10	-1.00679e-10	-2.44096e-13	5.79924e-09	-1.71838e-10	9.81188e-11	-0.0173607	-4.2091e-05	-0.0296311	0.0169193
721	2022-03-31 14:20:17	9783164	-1.31504e-10	-1.15485e-10	5.80606e-09	-1.59594e-10	2.89489e-10	-8.52146e-11	-2.3097e-13	5.77703e-09	-1.59434e-10	1.00453e-10	-0.0147506	-3.99808e-05	-0.027598	0.0173883
722	2022-03-31 14:20:31	9797207	-1.45855e-10	-1.21608e-10	5.79466e-09	-1.61916e-10	2.77948e-10	-9.4514e-11	-2.43216e-13	5.76569e-09	-1.61754e-10	9.6448e-11	-0.0163925	-4.21834e-05	-0.0280546	0.0167279
723	2022-03-31 14:20:45	9811251	-1.43254e-10	-1.18372e-10	5.78918e-09	-1.70494e-10	2.73702e-10	-9.28286e-11	-2.36744e-13	5.76023e-09	-1.70324e-10	9.49746e-11	-0.0161154	-4.10997e-05	-0.0295689	0.016488
724	2022-03-31 14:20:59	9825294	-1.46565e-10	-1.18771e-10	5.77568e-09	-1.64066e-10	2.70062e-10	-9.49741e-11	-2.37542e-13	5.7468e-09	-1.63902e-10	9.37115e-11	-0.0165264	-4.13346e-05	-0.0285205	0.0163067
725	2022-03-31 14:21:13	9839337	-1.47844e-10	-1.34723e-10	5.77252e-09	-1.62658e-10	2.69501e-10	-9.58029e-11	-2.69446e-13	5.74366e-09	-1.62495e-10	9.35168e-11	-0.0166798	-4.69119e-05	-0.0282913	0.0162818
726	2022-03-31 14:21:27	9853381	-1.42802e-10	-1.16376e-10	5.77093e-09	-1.66409e-10	2.69525e-10	-9.25357e-11	-2.32752e-13	5.74208e-09	-1.66243e-10	9.35252e-11	-0.0161154	-4.05345e-05	-0.0289517	0.0162877
727	2022-03-31 14:21:41	9867424	-1.53466e-10	-1.31098e-10	5.74991e-09	-1.73332e-10	2.64871e-10	-9.9446e-11	-2.62196e-13	5.72116e-09	-1.73159e-10	9.19102e-11	-0.0173821	-4.58292e-05	-0.0302664	0.016065
728	2022-03-31 14:21:55	9881467	-1.43082e-10	-1.3071e-10	5.76325e-09	-1.68129e-10	2.5449e-10	-9.27171e-11	-2.6142e-13	5.73443e-09	-1.67961e-10	8.8308e-11	-0.0161685	-4.55878e-05	-0.0292899	0.0153996
729	2022-03-31 14:22:09	9895511	-1.51832e-10	-1.31917e-10	5.75452e-09	-1.64453e-10	2.49844e-10	-9.83871e-11	-2.63834e-13	5.72575e-09	-1.64289e-10	8.66959e-11	-0.0171833	-4.60785e-05	-0.0286929	0.0151414
730	2022-03-31 14:22:23	9909554	-1.56401e-10	-1.24515e-10	5.73432e-09	-1.61454e-10	2.54106e-10	-1.01348e-10	-2.4903e-13	5.70565e-09	-1.61293e-10	8.81748e-11	-0.0177627	-4.36462e-05	-0.0282689	0.0154539
731	2022-03-31 14:22:37	9923597	-1.5309e-10	-1.2818e-10	5.73352e-09	-1.69623e-10	2.48056e-10	-9.92023e-11	-2.5636e-13	5.70485e-09	-1.69453e-10	8.60754e-11	-0.0173891	-4.49372e-05	-0.0297034	0.0150881
732	2022-03-31 14:22:51	9937640	-1.43856e-10	-1.33208e-10	5.72623e-09	-1.73827e-10	2.48646e-10	-9.32187e-11	-2.66416e-13	5.6976e-09	-1.73653e-10	8.62802e-11	-0.016361	-4.67593e-05	-0.0304783	0.0151432
733	2022-03-31 14:23:05	9951684	-1.47102e-10	-1.28805e-10	5.72259e-09	-1.74859e-10	2.49737e-10	-9.53221e-11	-2.5761e-13	5.69398e-09	-1.74684e-10	8.66587e-11	-0.0167409	-4.52425e-05	-0.0306788	0.0152194
734	2022-03-31 14:23:19	9965727	-1.54434e-10	-1.34323e-10	5.69627e-09	-1.70161e-10	2.45061e-10	-1.00073e-10	-2.68646e-13	5.66779e-09	-1.69991e-10	8.50362e-11	-0.0176565	-4.73987e-05	-0.0299924	0.0150034
735	2022-03-31 14:23:33	9979771	-1.50661e-10	-1.17993e-10	5.73062e-09	-1.71214e-10	2.44024e-10	-9.76283e-11	-2.35986e-13	5.70197e-09	-1.71043e-10	8.46763e-11	-0.0171219	-4.13868e-05	-0.0299972	0.0148504
736	2022-03-31 14:23:47	9993814	-1.55552e-10	-1.1143e-10	5.71871e-09	-1.64195e-10	2.52854e-10	-1.00798e-10	-2.2286e-13	5.69012e-09	-1.64031e-10	8.77403e-11	-0.0177145	-3.91662e-05	-0.0288273	0.0154198
737	2022-03-31 14:24:01	10007857	-1.47059e-10	-1.24638e-10	5.7161e-09	-1.6111e-10	2.4331e-10	-9.52942e-11	-2.49276e-13	5.68752e-09	-1.60949e-10	8.44286e-11	-0.016755	-4.38286e-05	-0.0282986	0.0148445
738	2022-03-31 14:24:15	10021900	-1.53047e-10	-1.19396e-10	5.71727e-09	-1.73483e-10	2.47802e-10	-9.91745e-11	-2.38792e-13	5.68868e-09	-1.7331e-10	8.59873e-11	-0.0174336	-4.19767e-05	-0.0304657	0.0151155
739	2022-03-31 14:24:29	10035944	-1.50392e-10	-1.34989e-10	5.73611e-09	-1.72816e-10	2.32199e-10	-9.7454e-11	-2.69978e-13	5.70743e-09	-1.72643e-10	8.05731e-11	-0.0170749	-4.73029e-05	-0.0302489	0.0141172
740	2022-03-31 14:24:43	10049987	-1.53993e-10	-1.22918e-10	5.70662e-09	-1.65517e-10	2.36653e-10	-9.97875e-11	-2.45836e-13	5.67809e-09	-1.65351e-10	8.21186e-11	-0.0175741	-4.32956e-05	-0.029121	0.0144624
741	2022-03-31 14:24:58	10064030	-1.52574e-10	-1.19929e-10	5.66917e-09	-1.74031e-10	2.40845e-10	-9.8868e-11	-2.39858e-13	5.64082e-09	-1.73857e-10	8.35732e-11	-0.0175272	-4.25218e-05	-0.0308212	0.0148158
742	2022-03-31 14:25:12	10078074	-1.44028e-10	-1.27975e-10	5.69005e-09	-1.65732e-10	2.44907e-10	-9.33301e-11	-2.5595e-13	5.6616e-09	-1.65566e-10	8.49827e-11	-0.0164848	-4.52081e-05	-0.0292437	0.0150104
743	2022-03-31 14:25:26	10092117	-1.52692e-10	-1.27147e-10	6.08182e-09	-1.53058e-10	2.41068e-10	-9.89444e-11	-2.54294e-13	6.05141e-09	-1.52905e-10	8.36506e-11	-0.0163506	-4.20223e-05	-0.0252677	0.0138233
744	2022-03-31 14:25:40	10106160	-1.51424e-10	-1.26184e-10	5.08504e-09	-1.6613e-10	2.48654e-10	-9.81228e-11	-2.52368e-13	5.05961e-09	-1.65964e-10	8.62829e-11	-0.0193933	-4.98789e-05	-0.0328017	0.0170533
745	2022-03-31 14:25:54	10120204	-1.46522e-10	-1.31231e-10	4.98468e-09	-1.67968e-10	2.5191e-10	-9.49463e-11	-2.62462e-13	4.95976e-09	-1.678e-10	8.74128e-11	-0.0191433	-5.29183e-05	-0.0338323	0.0176244
746	2022-03-31 14:26:08	10134247	-1.52166e-10	-1.35193e-10	5.00626e-09	-1.72999e-10	2.42941e-10	-9.86036e-11	-2.70386e-13	4.98123e-09	-1.72826e-10	8.43005e-11	-0.019795	-5.4281e-05	-0.0346955	0.0169236
747	2022-03-31 14:26:22	10148290	-1.40717e-10	-1.34077e-10	5.20726e-09	-1.70731e-10	2.45913e-10	-9.11846e-11	-2.68154e-13	5.18122e-09	-1.7056e-10	8.53318e-11	-0.0175991	-5.1755e-05	-0.0329189	0.0164694
748	2022-03-31 14:26:36	10162334	-1.40577e-10	-1.28057e-10	5.33582e-09	-1.71924e-10	2.34841e-10	-9.10939e-11	-2.56114e-13	5.30914e-09	-1.71752e-10	8.14898e-11	-0.0171579	-4.82402e-05	-0.0323503	0.015349
749	2022-03-31 14:26:50	10176377	-1.55788e-10	-1.37353e-10	5.42222e-09	-1.70849e-10	2.31693e-10	-1.00951e-10	-2.74706e-13	5.39511e-09	-1.70678e-10	8.03975e-11	-0.0187115	-5.09176e-05	-0.0316357	0.0149019
750	2022-03-31 14:27:04	10190420	-1.46952e-10	-1.28354e-10	9.41967e-09	-1.77224e-10	2.61854e-10	-9.52249e-11	-2.56708e-13	9.37257e-09	-1.77047e-10	9.08633e-11	-0.01016	-2.73893e-05	-0.0188899	0.0096946
751	2022-03-31 14:27:18	10204464	-1.60991e-10	-1.28365e-10	9.41967e-09	-1.71999e-10	2.49061e-10	-1.04322e-10	-2.5673e-13	9.37257e-09	-1.71827e-10	8.64242e-11	-0.0111306	-2.73916e-05	-0.018333	0.00922097
752	2022-03-31 14:27:32	10218507	-1.46877e-10	-1.31395e-10	9.41967e-09	-1.46737e-10	2.25235e-10	-9.51763e-11	-2.6279e-13	9.37257e-09	-1.4659e-10	7.81565e-11	-0.0101548	-2.80382e-05	-0.0156403	0.00833886
753	2022-03-31 14:27:46	10232550	-1.50016e-10	-1.26307e-10	9.41967e-09	-1.54445e-10	2.04994e-10	-9.72104e-11	-2.52614e-13	9.37257e-09	-1.54291e-10	7.11329e-11	-0.0103718	-2.69525e-05	-0.0164619	0.00758948
754	2022-03-31 14:28:00	10246594	-1.52499e-10	-1.4493e-10	9.41967e-09	-1.54068e-10	1.86181e-10	-9.88194e-11	-2.8986e-13	9.37257e-09	-1.53914e-10	6.46048e-11	-0.0105435	-3.09264e-05	-0.0164217	0.00689296
755	2022-03-31 14:28:14	10260637	-1.57272e-10	-1.46927e-10	9.41967e-09	-1.5567e-10	1.83264e-10	-1.01912e-10	-2.93854e-13	9.37257e-09	-1.55514e-10	6.35926e-11	-0.0108735	-3.13525e-05	-0.0165925	0.00678497
756	2022-03-31 14:28:28	10274680	-1.6886e-10	-1.32316e-10	9.41967e-09	-1.53993e-10	1.56804e-10	-1.09421e-10	-2.64632e-13	9.37257e-09	-1.53839e-10	5.4411e-11	-0.0116746	-2.82347e-05	-0.0164137	0.00580534
757	2022-03-31 14:28:42	10288724	-1.60669e-10	-1.50212e-10	9.41967e-09	-1.52649e-10	1.58631e-10	-1.04114e-10	-3.00424e-13	9.37257e-09	-1.52496e-10	5.5045e-11	-0.0111083	-3.20535e-05	-0.0162705	0.00587298
758	2022-03-31 14:28:56	10302767	-1.7387e-10	-1.36289e-10	9.41967e-09	-1.48027e-10	1.65319e-10	-1.12668e-10	-2.72578e-13	9.37257e-09	-1.47879e-10	5.73657e-11	-0.012021	-2.90825e-05	-0.0157778	0.00612059
759	2022-03-31 14:29:10	10316810	1.90349e-10	-1.3719e-10	9.41967e-09	-1.2758e-10	9.49864e-10	1.23346e-10	-2.7438e-13	9.37257e-09	-1.27452e-10	3.29603e-10	0.0131603	-2.92748e-05	-0.0135984	0.0351667
760	2022-03-31 14:29:24	10330853	4.33926e-09	-1.34508e-10	9.41967e-09	-6.92836e-11	1.78411e-09	2.81184e-09	-2.69016e-13	9.37257e-09	-6.92143e-11	6.19086e-10	0.300007	-2.87025e-05	-0.00738477	0.066053
761	2022-03-31 14:29:42	10348148	7.4861e-09	-1.27494e-10	9.41967e-09	-4.43759e-11	2.10791e-09	4.85099e-09	-2.54988e-13	9.37257e-09	-4.43315e-11	7.31445e-10	0.517573	-2.72058e-05	-0.00472992	0.078041
762	2022-03-31 14:29:53	10359981	9.15481e-09	-1.18178e-10	9.41967e-09	-3.56361e-11	2.02184e-09	5.93232e-09	-2.36356e-13	9.37257e-09	-3.56005e-11	7.01578e-10	0.632944	-2.52178e-05	-0.00379837	0.0748544
763	2022-03-31 14:30:05	10371815	1.0406e-08	-1.19918e-10	9.41967e-09	-1.75977e-11	1.81984e-09	6.74309e-09	-2.39836e-13	9.37257e-09	-1.75801e-11	6.31484e-10	0.719449	-2.55891e-05	-0.0018757	0.0673758
764	2022-03-31 14:30:18	10384688	1.127e-08	-1.26246e-10	9.41967e-09	-2.38219e-11	1.56597e-09	7.30296e-09	-2.52492e-13	9.37257e-09	-2.37981e-11	5.43392e-10	0.779184	-2.69395e-05	-0.00253912	0.0579768
765	2022-03-31 14:30:29	10395992	1.16839e-08	-1.23061e-10	9.41967e-09	-2.92077e-11	1.34943e-09	7.57117e-09	-2.46122e-13	9.37257e-09	-2.91785e-11	4.68252e-10	0.8078	-2.62598e-05	-0.00311318	0.0499598
766	2022-03-31 14:30:41	10407295	1.21005e-08	-1.23768e-10	9.41967e-09	-3.56791e-11	1.17769e-09	7.84112e-09	-2.47536e-13	9.37257e-09	-3.56434e-11	4.08658e-10	0.836603	-2.64107e-05	-0.00380295	0.0436015
767	2022-03-31 14:30:52	10418598	1.23444e-08	-1.29419e-10	9.41967e-09	-3.01107e-11	1.02394e-09	7.99917e-09	-2.58838e-13	9.37257e-09	-3.00806e-11	3.55307e-10	0.853466	-2.76165e-05	-0.00320943	0.0379093
768	2022-03-31 14:31:03	10429902	1.25291e-08	-1.3121e-10	9.41967e-09	-2.80144e-11	9.10171e-10	8.11886e-09	-2.6242e-13	9.37257e-09	-2.79864e-11	3.15829e-10	0.866236	-2.79987e-05	-0.00298599	0.0336972
769	2022-03-31 14:31:15	10441205	1.26937e-08	-1.17072e-10	9.41967e-09	-3.47546e-11	8.01136e-10	8.22552e-09	-2.34144e-13	9.37257e-09	-3.47198e-11	2.77994e-10	0.877616	-2.49818e-05	-0.00370441	0.0296604
770	2022-03-31 14:31:26	10452508	1.13936e-08	-1.22703e-10	9.41967e-09	-4.51714e-11	6.87499e-10	7.38305e-09	-2.45406e-13	9.37257e-09	-4.51262e-11	2.38562e-10	0.78773	-2.61834e-05	-0.00481471	0.0254532
771	2022-03-31 14:31:38	10464322	7.3849e-09	-1.20021e-10	9.41967e-09	-8.94291e-11	5.2195e-10	4.78542e-09	-2.40042e-13	9.37257e-09	-8.93397e-11	1.81117e-10	0.510577	-2.56111e-05	-0.00953203	0.0193241
772	2022-03-31 14:31:50	10476155	4.69706e-09	-1.29931e-10	9.41967e-09	-1.01383e-10	4.62917e-10	3.04369e-09	-2.59862e-13	9.37257e-09	-1.01282e-10	1.60632e-10	0.324745	-2.77258e-05	-0.0108062	0.0171385
773	2022-03-31 14:32:01	10487988	3.26994e-09	-1.2261e-10	9.41967e-09	-1.24269e-10	4.09958e-10	2.11892e-09	-2.4522e-13	9.37257e-09	-1.24145e-10	1.42255e-10	0.226077	-2.61636e-05	-0.0132455	0.0151778
774	2022-03-31 14:32:13	10499822	2.2904e-09	-1.2691e-10	9.41967e-09	-1.19066e-10	3.82108e-10	1.48418e-09	-2.5382e-13	9.37257e-09	-1.18947e-10	1.32591e-10	0.158353	-2.70811e-05	-0.012691	0.0141468
775	2022-03-31 14:32:25	10511655	1.64084e-09	-1.26931e-10	9.41967e-09	-1.37578e-10	3.46994e-10	1.06326e-09	-2.53862e-13	9.37257e-09	-1.3744e-10	1.20407e-10	0.113444	-2.70856e-05	-0.0146641	0.0128467
776	2022-03-31 14:32:37	10523488	1.20021e-09	-1.39913e-10	9.41967e-09	-1.29902e-10	3.1909e-10	7.77736e-10	-2.79826e-13	9.37257e-09	-1.29772e-10	1.10724e-10	0.08298	-2.98558e-05	-0.0138459	0.0118136
777	2022-03-31 14:32:50	10536362	7.88124e-10	-1.39483e-10	9.41967e-09	-1.37814e-10	2.8707e-10	5.10704e-10	-2.78966e-13	9.37257e-09	-1.37676e-10	9.96133e-11	0.0544892	-2.97641e-05	-0.0146893	0.0106282
778	2022-03-31 14:33:04	10550405	5.23739e-10	-1.30669e-10	9.41967e-09	-1.4219e-10	2.68181e-10	3.39383e-10	-2.61338e-13	9.37257e-09	-1.42048e-10	9.30588e-11	0.0362102	-2.78833e-05	-0.0151557	0.00992884
779	2022-03-31 14:33:18	10564448	3.44827e-10	-1.39555e-10	9.41967e-09	-1.39545e-10	2.58882e-10	2.23448e-10	-2.7911e-13	9.37257e-09	-1.39405e-10	8.98321e-11	0.0238406	-2.97794e-05	-0.0148738	0.00958457
780	2022-03-31 14:33:32	10578492	2.01551e-10	-1.39974e-10	9.41967e-09	-1.5123e-10	3.59947e-10	1.30605e-10	-2.79948e-13	9.37257e-09	-1.51079e-10	1.24902e-10	0.0139348	-2.98689e-05	-0.0161192	0.0133263
781	2022-03-31 14:33:46	10592535	7.84748e-11	-1.30095e-10	9.41967e-09	-1.64829e-10	5.14186e-10	5.08517e-11	-2.6019e-13	9.37257e-09	-1.64664e-10	1.78423e-10	0.00542558	-2.77608e-05	-0.0175687	0.0190367
782	2022-03-31 14:34:00	10606578	6.13824e-12	-1.26686e-10	9.41967e-09	-1.56326e-10	5.89782e-10	3.97758e-12	-2.53372e-13	9.37257e-09	-1.5617e-10	2.04654e-10	0.000424385	-2.70333e-05	-0.0166624	0.0218355
783	2022-03-31 14:34:14	10620622	-4.18926e-11	-1.30003e-10	9.41967e-09	-1.51392e-10	6.14261e-10	-2.71464e-11	-2.60006e-13	9.37257e-09	-1.51241e-10	2.13149e-10	-0.00289637	-2.77412e-05	-0.0161365	0.0227417
784	2022-03-31 14:34:28	10634665	-8.09796e-11	-1.3721e-10	9.41967e-09	-1.60196e-10	6.19061e-10	-5.24748e-11	-2.7442e-13	9.37257e-09	-1.60036e-10	2.14814e-10	-0.00559876	-2.92791e-05	-0.0170749	0.0229194
785	2022-03-31 14:34:42	10648708	-1.03425e-10	-1.2777e-10	9.41967e-09	-1.62281e-10	6.00901e-10	-6.70194e-11	-2.5554e-13	9.37257e-09	-1.62119e-10	2.08513e-10	-0.00715059	-2.72647e-05	-0.0172971	0.0222471
786	2022-03-31 14:34:56	10662752	-1.20055e-10	-1.26757e-10	9.41967e-09	-1.60895e-10	5.75508e-10	-7.77956e-11	-2.53514e-13	9.37257e-09	-1.60734e-10	1.99701e-10	-0.00830035	-2.70485e-05	-0.0171494	0.021307
787	2022-03-31 14:35:10	10676795	-1.18196e-10	-1.28928e-10	9.41967e-09	-1.77428e-10	5.47081e-10	-7.6591e-11	-2.57856e-13	9.37257e-09	-1.77251e-10	1.89837e-10	-0.00817182	-2.75118e-05	-0.0189116	0.0202545
788	2022-03-31 14:35:24	10690838	-1.34686e-10	-1.2433e-10	9.41967e-09	-1.58207e-10	5.26165e-10	-8.72765e-11	-2.4866e-13	9.37257e-09	-1.58049e-10	1.82579e-10	-0.00931191	-2.65306e-05	-0.0168629	0.0194802
789	2022-03-31 14:35:38	10704882	-1.36772e-10	-1.31794e-10	9.41967e-09	-1.74945e-10	4.96188e-10	-8.86283e-11	-2.63588e-13	9.37257e-09	-1.7477e-10	1.72177e-10	-0.00945613	-2.81233e-05	-0.018647	0.0183703
790	2022-03-31 14:35:52	10718925	-1.35729e-10	-1.37129e-10	8.27537e-09	-1.8262e-10	4.67762e-10	-8.79524e-11	-2.74258e-13	8.23399e-09	-1.82437e-10	1.62313e-10	-0.0106816	-3.3308e-05	-0.0221566	0.0197126
791	2022-03-31 14:36:06	10732968	-1.5381e-10	-1.3679e-10	7.46238e-09	-1.82255e-10	4.56551e-10	-9.96689e-11	-2.7358e-13	7.42507e-09	-1.82073e-10	1.58423e-10	-0.0134233	-3.68455e-05	-0.0245214	0.0213363
792	2022-03-31 14:36:21	10747012	-1.37019e-10	-1.31518e-10	6.98698e-09	-1.76826e-10	4.40265e-10	-8.87883e-11	-2.63036e-13	6.95205e-09	-1.76649e-10	1.52772e-10	-0.0127715	-3.78358e-05	-0.0254097	0.0219751
793	2022-03-31 14:36:35	10761055	-1.35697e-10	-1.33432e-10	6.65815e-09	-1.74579e-10	4.24532e-10	-8.79317e-11	-2.66864e-13	6.62486e-09	-1.74404e-10	1.47313e-10	-0.013273	-4.02822e-05	-0.0263258	0.0222363
794	2022-03-31 14:36:49	10775098	-1.49134e-10	-1.33484e-10	6.45493e-09	-1.70107e-10	4.06249e-10	-9.66388e-11	-2.66968e-13	6.42266e-09	-1.69937e-10	1.40968e-10	-0.0150466	-4.15666e-05	-0.026459	0.0219486
795	2022-03-31 14:37:03	10789142	-1.44748e-10	-1.26132e-10	6.32203e-09	-1.63819e-10	3.94785e-10	-9.37967e-11	-2.52264e-13	6.29042e-09	-1.63655e-10	1.3699e-10	-0.014911	-4.01029e-05	-0.0260166	0.0217776
796	2022-03-31 14:37:17	10803185	-1.22463e-10	-1.15526e-10	6.18922e-09	-1.74009e-10	3.83597e-10	-7.9356e-11	-2.31052e-13	6.15827e-09	-1.73835e-10	1.33108e-10	-0.0128861	-3.7519e-05	-0.0282279	0.0216145
797	2022-03-31 14:37:31	10817228	-1.48521e-10	-1.30945e-10	6.13908e-09	-1.70569e-10	3.7168e-10	-9.62416e-11	-2.6189e-13	6.10838e-09	-1.70398e-10	1.28973e-10	-0.0157557	-4.28739e-05	-0.0278958	0.0211141
798	2022-03-31 14:37:45	10831272	-1.50618e-10	-1.1917e-10	6.09522e-09	-1.64775e-10	3.64363e-10	-9.76005e-11	-2.3834e-13	6.06474e-09	-1.6461e-10	1.26434e-10	-0.0160931	-3.92993e-05	-0.0271422	0.0208474
799	2022-03-31 14:37:59	10845315	-1.34858e-10	-1.34426e-10	6.05161e-09	-1.67129e-10	3.56899e-10	-8.7388e-11	-2.68852e-13	6.02135e-09	-1.66962e-10	1.23844e-10	-0.014513	-4.46498e-05	-0.0277283	0.0205675
800	2022-03-31 14:38:13	10859358	-1.42555e-10	-1.23707e-10	6.00463e-09	-1.55272e-10	3.43308e-10	-9.23756e-11	-2.47414e-13	5.97461e-09	-1.55117e-10	1.19128e-10	-0.0154614	-4.14109e-05	-0.0259627	0.019939
801	2022-03-31 14:38:27	10873402	-1.36019e-10	-1.07632e-10	5.96517e-09	-1.61131e-10	3.36581e-10	-8.81403e-11	-2.15264e-13	5.93534e-09	-1.6097e-10	1.16794e-10	-0.0148501	-3.62682e-05	-0.0271206	0.0196776
802	2022-03-31 14:38:41	10887445	-1.41405e-10	-1.1956e-10	5.94658e-09	-1.68151e-10	3.28657e-10	-9.16304e-11	-2.3912e-13	5.91685e-09	-1.67983e-10	1.14044e-10	-0.0154864	-4.04134e-05	-0.0283906	0.0192745
803	2022-03-31 14:38:55	10901488	-1.47231e-10	-1.33975e-10	5.92741e-09	-1.77847e-10	3.16579e-10	-9.54057e-11	-2.6795e-13	5.89777e-09	-1.77669e-10	1.09853e-10	-0.0161766	-4.54324e-05	-0.0301248	0.0186262
804	2022-03-31 14:39:09	10915532	-1.44071e-10	-1.28979e-10	5.89943e-09	-1.6915e-10	3.16625e-10	-9.3358e-11	-2.57958e-13	5.86993e-09	-1.68981e-10	1.09869e-10	-0.0159044	-4.39456e-05	-0.0287875	0.0187172
805	2022-03-31 14:39:23	10929575	-1.44264e-10	-1.24198e-10	5.88922e-09	-1.75869e-10	3.07695e-10	-9.34831e-11	-2.48396e-13	5.85977e-09	-1.75693e-10	1.0677e-10	-0.0159534	-4.239e-05	-0.0299829	0.0182209
806	2022-03-31 14:39:37	10943618	-1.52864e-10	-1.23164e-10	5.89193e-09	-1.74106e-10	3.04992e-10	-9.90559e-11	-2.46328e-13	5.86247e-09	-1.73932e-10	1.05832e-10	-0.0168966	-4.20178e-05	-0.0296687	0.0180525
807	2022-03-31 14:39:51	10957662	-1.54004e-10	-1.31969e-10	5.85396e-09	-1.71494e-10	3.04178e-10	-9.97946e-11	-2.63938e-13	5.82469e-09	-1.71323e-10	1.0555e-10	-0.017133	-4.53137e-05	-0.0294132	0.0181211
808	2022-03-31 14:40:05	10971705	-1.44544e-10	-1.17328e-10	5.85513e-09	-1.76708e-10	2.98826e-10	-9.36645e-11	-2.34656e-13	5.82585e-09	-1.76531e-10	1.03693e-10	-0.0160774	-4.02784e-05	-0.0303014	0.0177987
809	2022-03-31 14:40:19	10985748	-1.47145e-10	-1.29542e-10	5.83298e-09	-1.81706e-10	2.93374e-10	-9.535e-11	-2.59084e-13	5.80382e-09	-1.81524e-10	1.01801e-10	-0.0164288	-4.46403e-05	-0.0312767	0.0175403
810	2022-03-31 14:40:33	10999792	-1.50532e-10	-1.39821e-10	5.80509e-09	-1.70741e-10	2.80344e-10	-9.75447e-11	-2.79642e-13	5.77606e-09	-1.7057e-10	9.72794e-11	-0.0168878	-4.84139e-05	-0.0295305	0.0168418
811	2022-03-31 14:40:47	11013835	-1.5638e-10	-1.31436e-10	5.80827e-09	-1.78438e-10	2.79238e-10	-1.01334e-10	-2.62872e-13	5.77923e-09	-1.7826e-10	9.68956e-11	-0.0175342	-4.54857e-05	-0.0308449	0.0167662
812	2022-03-31 14:41:01	11027878	-1.56025e-10	-1.3116e-10	5.77433e-09	-1.74719e-10	2.77749e-10	-1.01104e-10	-2.6232e-13	5.74546e-09	-1.74544e-10	9.63789e-11	-0.0175972	-4.56569e-05	-0.0303795	0.0167748
813	2022-03-31 14:41:15	11041922	-1.50381e-10	-1.33852e-10	5.77703e-09	-1.75461e-10	2.80605e-10	-9.74469e-11	-2.67704e-13	5.74814e-09	-1.75286e-10	9.73699e-11	-0.0169528	-4.65722e-05	-0.0304943	0.0169394
814	2022-03-31 14:41:29	11055965	-1.5151e-10	-1.23348e-10	5.78343e-09	-1.70731e-10	2.64979e-10	-9.81785e-11	-2.46696e-13	5.75451e-09	-1.7056e-10	9.19477e-11	-0.0170611	-4.287e-05	-0.0296394	0.0159784
815	2022-03-31 14:41:44	11070008	-1.6112e-10	-1.26972e-10	5.76851e-09	-1.7115e-10	2.66799e-10	-1.04406e-10	-2.53944e-13	5.73967e-09	-1.70979e-10	9.25793e-11	-0.0181902	-4.42437e-05	-0.029789	0.0161297
816	2022-03-31 14:41:58	11084052	-1.6914e-10	-1.28334e-10	5.76408e-09	-1.80932e-10	2.68235e-10	-1.09603e-10	-2.56668e-13	5.73526e-09	-1.80751e-10	9.30775e-11	-0.0191103	-4.47526e-05	-0.0315158	0.016229
817	2022-03-31 14:42:12	11098095	-1.57713e-10	-1.23041e-10	5.75017e-09	-1.7603e-10	2.61055e-10	-1.02198e-10	-2.46082e-13	5.72142e-09	-1.75854e-10	9.05861e-11	-0.0178624	-4.30107e-05	-0.0307361	0.0158328
818	2022-03-31 14:42:26	11112138	-1.5323e-10	-1.23809e-10	5.75545e-09	-1.74966e-10	2.57477e-10	-9.9293e-11	-2.47618e-13	5.72667e-09	-1.74791e-10	8.93445e-11	-0.0173387	-4.32394e-05	-0.0305223	0.0156015
819	2022-03-31 14:42:40	11126182	-1.57025e-10	-1.27003e-10	5.74089e-09	-1.76041e-10	2.55619e-10	-1.01752e-10	-2.54006e-13	5.71219e-09	-1.75865e-10	8.86998e-11	-0.0178132	-4.44674e-05	-0.0307877	0.0155282
820	2022-03-31 14:42:54	11140225	-1.47092e-10	-1.2816e-10	5.74772e-09	-1.7516e-10	2.51764e-10	-9.53156e-11	-2.5632e-13	5.71898e-09	-1.74985e-10	8.73621e-11	-0.0166665	-4.48192e-05	-0.0305972	0.0152758
821	2022-03-31 14:43:08	11154268	-1.57508e-10	-1.37077e-10	5.72153e-09	-1.76622e-10	2.55972e-10	-1.02065e-10	-2.74154e-13	5.69292e-09	-1.76445e-10	8.88223e-11	-0.0179284	-4.8157e-05	-0.0309938	0.0156022
822	2022-03-31 14:43:22	11168312	-1.46156e-10	-1.30044e-10	5.71793e-09	-1.75504e-10	2.48447e-10	-9.47091e-11	-2.60088e-13	5.68934e-09	-1.75328e-10	8.62111e-11	-0.0166468	-4.5715e-05	-0.030817	0.0151531
823	2022-03-31 14:43:36	11182355	-1.56702e-10	-1.32808e-10	5.72043e-09	-1.74515e-10	2.50336e-10	-1.01543e-10	-2.65616e-13	5.69183e-09	-1.7434e-10	8.68666e-11	-0.0178401	-4.66662e-05	-0.03063	0.0152616
824	2022-03-31 14:43:50	11196398	-1.49285e-10	-1.30955e-10	5.73836e-09	-1.63528e-10	2.48631e-10	-9.67367e-11	-2.6191e-13	5.70967e-09	-1.63364e-10	8.6275e-11	-0.0169426	-4.58713e-05	-0.0286119	0.0151103
825	2022-03-31 14:44:04	11210442	-1.46672e-10	-1.3459e-10	5.70921e-09	-1.84061e-10	2.43356e-10	-9.50435e-11	-2.6918e-13	5.68066e-09	-1.83877e-10	8.44445e-11	-0.016731	-4.73853e-05	-0.0323689	0.0148653
826	2022-03-31 14:44:18	11224485	-1.47887e-10	-1.30617e-10	5.71724e-09	-1.85372e-10	2.39931e-10	-9.58308e-11	-2.61234e-13	5.68865e-09	-1.85187e-10	8.32561e-11	-0.0168459	-4.59219e-05	-0.0325537	0.0146355
827	2022-03-31 14:44:32	11238528	-1.54746e-10	-1.34446e-10	5.71272e-09	-1.61819e-10	2.47794e-10	-1.00275e-10	-2.68892e-13	5.68416e-09	-1.61657e-10	8.59845e-11	-0.0176412	-4.73055e-05	-0.02844	0.015127
828	2022-03-31 14:44:46	11252572	-1.57616e-10	-1.30105e-10	5.68592e-09	-1.71053e-10	2.38926e-10	-1.02135e-10	-2.6021e-13	5.65749e-09	-1.70882e-10	8.29073e-11	-0.0180531	-4.59939e-05	-0.0302045	0.0146544
829	2022-03-31 14:45:00	11266615	-1.50327e-10	-1.3076e-10	5.6955e-09	-1.75751e-10	2.44331e-10	-9.74119e-11	-2.6152e-13	5.66702e-09	-1.75575e-10	8.47829e-11	-0.0171893	-4.61477e-05	-0.0309819	0.0149607
830	2022-03-31 14:45:14	11280658	-1.45425e-10	-1.23051e-10	5.70458e-09	-1.76665e-10	2.40031e-10	-9.42354e-11	-2.46102e-13	5.67606e-09	-1.76488e-10	8.32908e-11	-0.0166023	-4.33579e-05	-0.0310935	0.0146741
831	2022-03-31 14:45:28	11294702	-1.49349e-10	-1.24177e-10	5.6843e-09	-1.76643e-10	2.42473e-10	-9.67782e-11	-2.48354e-13	5.65588e-09	-1.76466e-10	8.41381e-11	-0.0171111	-4.39108e-05	-0.0312005	0.0148762
832	2022-03-31 14:45:42	11308745	-1.51134e-10	-1.27832e-10	5.67894e-09	-1.63561e-10	2.46689e-10	-9.79348e-11	-2.55664e-13	5.65055e-09	-1.63397e-10	8.56011e-11	-0.0173319	-4.52459e-05	-0.0289171	0.0151492
833	2022-03-31 14:45:56	11322788	-1.54111e-10	-1.2988e-10	5.67519e-09	-1.78524e-10	2.37789e-10	-9.98639e-11	-2.5976e-13	5.64681e-09	-1.78345e-10	8.25128e-11	-0.017685	-4.60012e-05	-0.0315834	0.0146123
834	2022-03-31 14:46:10	11336832	-1.54047e-10	-1.26102e-10	5.6885e-09	-1.78406e-10	2.36837e-10	-9.98225e-11	-2.52204e-13	5.66006e-09	-1.78228e-10	8.21824e-11	-0.0176363	-4.45586e-05	-0.0314887	0.0145197
835	2022-03-31 14:46:24	11350875	-1.57648e-10	-1.23112e-10	6.25938e-09	-1.64227e-10	2.41406e-10	-1.02156e-10	-2.46224e-13	6.22808e-09	-1.64063e-10	8.37679e-11	-0.0164025	-3.95345e-05	-0.0263424	0.01345
836	2022-03-31 14:46:38	11364918	-1.53746e-10	-1.15864e-10	5.12744e-09	-1.70827e-10	2.33382e-10	-9.96274e-11	-2.31728e-13	5.1018e-09	-1.70656e-10	8.09836e-11	-0.0195279	-4.54208e-05	-0.0334502	0.0158735
837	2022-03-31 14:46:52	11378962	-1.58411e-10	-1.20553e-10	4.97906e-09	-1.71472e-10	2.45583e-10	-1.0265e-10	-2.41106e-13	4.95416e-09	-1.71301e-10	8.52173e-11	-0.02072	-4.86673e-05	-0.0345771	0.0172011
838	2022-03-31 14:47:07	11393005	-1.50338e-10	-1.33258e-10	4.99936e-09	-1.69989e-10	2.43103e-10	-9.7419e-11	-2.66516e-13	4.97436e-09	-1.69819e-10	8.43567e-11	-0.0195842	-5.35779e-05	-0.0341388	0.0169583
839	2022-03-31 14:47:21	11407048	-1.56347e-10	-1.35521e-10	5.18383e-09	-1.67785e-10	2.34587e-10	-1.01313e-10	-2.71042e-13	5.15791e-09	-1.67617e-10	8.14017e-11	-0.0196422	-5.25488e-05	-0.0324971	0.0157819
840	2022-03-31 14:47:35	11421092	-1.57928e-10	-1.26747e-10	5.29852e-09	-1.57347e-10	2.34649e-10	-1.02337e-10	-2.53494e-13	5.27203e-09	-1.5719e-10	8.14232e-11	-0.0194114	-4.80828e-05	-0.0298158	0.0154444
841	2022-03-31 14:47:49	11435135	-1.51725e-10	-1.21771e-10	5.38218e-09	-1.77277e-10	2.31094e-10	-9.83178e-11	-2.43542e-13	5.35527e-09	-1.771e-10	8.01896e-11	-0.0183591	-4.54771e-05	-0.0330702	0.014974
842	2022-03-31 14:48:03	11449178	-1.44028e-10	-1.29511e-10	8.75892e-09	-1.70967e-10	2.58199e-10	-9.33301e-11	-2.59022e-13	8.71513e-09	-1.70796e-10	8.95951e-11	-0.010709	-2.9721e-05	-0.0195977	0.0102804
843	2022-03-31 14:48:17	11463221	-1.53692e-10	-1.32552e-10	9.41967e-09	-1.62281e-10	2.52432e-10	-9.95924e-11	-2.65104e-13	9.37257e-09	-1.62119e-10	8.75939e-11	-0.0106259	-2.82851e-05	-0.0172971	0.00934577
844	2022-03-31 14:48:31	11477265	-1.2342e-10	-1.30484e-10	9.41967e-09	-1.76471e-10	2.22371e-10	-7.99762e-11	-2.60968e-13	9.37257e-09	-1.76295e-10	7.71627e-11	-0.008533	-2.78438e-05	-0.0188096	0.00823282
845	2022-03-31 14:48:45	11491308	-1.56068e-10	-1.4151e-10	9.41967e-09	-1.42727e-10	1.96747e-10	-1.01132e-10	-2.8302e-13	9.37257e-09	-1.42584e-10	6.82712e-11	-0.0107902	-3.01966e-05	-0.0152129	0.00728415
846	2022-03-31 14:48:59	11505351	-1.60164e-10	-1.40425e-10	9.41967e-09	-1.60174e-10	1.88124e-10	-1.03786e-10	-2.8085e-13	9.37257e-09	-1.60014e-10	6.5279e-11	-0.0110734	-2.99651e-05	-0.0170726	0.0069649
847	2022-03-31 14:49:13	11519395	-1.67151e-10	-1.44858e-10	9.41967e-09	-1.58863e-10	1.76975e-10	-1.08314e-10	-2.89716e-13	9.37257e-09	-1.58704e-10	6.14103e-11	-0.0115565	-3.0911e-05	-0.0169328	0.00655213
848	2022-03-31 14:49:27	11533438	-1.5811e-10	-1.48257e-10	9.41967e-09	-1.42523e-10	1.62033e-10	-1.02455e-10	-2.96514e-13	9.37257e-09	-1.4238e-10	5.62255e-11	-0.0109314	-3.16364e-05	-0.0151912	0.00599894
849	2022-03-31 14:49:41	11547481	-1.6097e-10	-1.44807e-10	9.41967e-09	-1.54541e-10	1.57494e-10	-1.04309e-10	-2.89614e-13	9.37257e-09	-1.54386e-10	5.46504e-11	-0.0111291	-3.09002e-05	-0.0164722	0.00583089
850	2022-03-31 14:49:55	11561525	-1.49532e-10	-1.48124e-10	9.41967e-09	-1.57541e-10	1.54254e-10	-9.68967e-11	-2.96248e-13	9.37257e-09	-1.57383e-10	5.35261e-11	-0.0103383	-3.1608e-05	-0.0167919	0.00571093
851	2022-03-31 14:50:09	11575568	4.28494e-11	-1.38644e-10	9.41967e-09	-1.34073e-10	8.42671e-10	2.77664e-11	-2.77288e-13	9.37257e-09	-1.33939e-10	2.92407e-10	0.00296252	-2.9585e-05	-0.0142905	0.0311981
852	2022-03-31 14:50:23	11589611	3.80021e-09	-1.44869e-10	9.41967e-09	-7.87758e-11	1.72531e-09	2.46254e-09	-2.89738e-13	9.37257e-09	-7.8697e-11	5.98683e-10	0.262739	-3.09134e-05	-0.00839652	0.063876
853	2022-03-31 14:50:40	11606905	7.13338e-09	-1.30781e-10	9.41967e-09	-4.99659e-11	2.08647e-09	4.62243e-09	-2.61562e-13	9.37257e-09	-4.99159e-11	7.24005e-10	0.493187	-2.79072e-05	-0.00532575	0.0772472
854	2022-03-31 14:50:52	11618738	8.91746e-09	-1.4194e-10	9.41967e-09	-3.16264e-11	2.02834e-09	5.77851e-09	-2.8388e-13	9.37257e-09	-3.15948e-11	7.03834e-10	0.616535	-3.02884e-05	-0.00337098	0.0750951
855	2022-03-31 14:51:04	11630572	1.02929e-08	-1.34027e-10	9.41967e-09	-1.60282e-11	1.83936e-09	6.6698e-09	-2.68054e-13	9.37257e-09	-1.60122e-11	6.38258e-10	0.71163	-2.85998e-05	-0.00170841	0.0680985
856	2022-03-31 14:51:17	11643445	1.11968e-08	-1.31969e-10	9.41967e-09	-2.87562e-11	1.58214e-09	7.25553e-09	-2.63938e-13	9.37257e-09	-2.87274e-11	5.49003e-10	0.774123	-2.81607e-05	-0.00306505	0.0585754
857	2022-03-31 14:51:28	11654748	1.16765e-08	-1.26369e-10	9.41967e-09	-3.10459e-11	1.36958e-09	7.56637e-09	-2.52738e-13	9.37257e-09	-3.10149e-11	4.75244e-10	0.807289	-2.69657e-05	-0.00330911	0.0507059
858	2022-03-31 14:51:40	11666052	1.20192e-08	-1.1781e-10	9.41967e-09	-2.84014e-11	1.19333e-09	7.78844e-09	-2.3562e-13	9.37257e-09	-2.8373e-11	4.14086e-10	0.830982	-2.51393e-05	-0.00302724	0.0441806
859	2022-03-31 14:51:51	11677355	1.2257e-08	-1.36627e-10	9.41967e-09	-2.77564e-11	1.03036e-09	7.94254e-09	-2.73254e-13	9.37257e-09	-2.77286e-11	3.57535e-10	0.847423	-2.91546e-05	-0.00295849	0.0381469
860	2022-03-31 14:52:02	11688658	1.25063e-08	-1.35296e-10	9.41967e-09	-4.25484e-11	9.17329e-10	8.10408e-09	-2.70592e-13	9.37257e-09	-4.25059e-11	3.18313e-10	0.864659	-2.88706e-05	-0.00453513	0.0339622
861	2022-03-31 14:52:13	11699962	1.27045e-08	-1.25846e-10	9.41967e-09	-4.08929e-11	7.99679e-10	8.23252e-09	-2.51692e-13	9.37257e-09	-4.0852e-11	2.77489e-10	0.878363	-2.68541e-05	-0.00435868	0.0296065
862	2022-03-31 14:52:25	11711265	1.16006e-08	-1.29389e-10	9.41967e-09	-5.06431e-11	6.89895e-10	7.51719e-09	-2.58778e-13	9.37257e-09	-5.05925e-11	2.39394e-10	0.802041	-2.76101e-05	-0.00539793	0.0255419
863	2022-03-31 14:52:37	11723079	8.40233e-09	-1.40405e-10	9.41967e-09	-1.21184e-10	3.90976e-10	5.44471e-09	-2.8081e-13	9.37257e-09	-1.21063e-10	1.35669e-10	0.58092	-2.99608e-05	-0.0129167	0.0144751
864	2022-03-31 14:52:48	11734912	2.58639e-09	-1.25949e-10	9.41967e-09	-1.55122e-10	3.36321e-10	1.67598e-09	-2.51898e-13	9.37257e-09	-1.54967e-10	1.16703e-10	0.178818	-2.68761e-05	-0.0165341	0.0124516
865	2022-03-31 14:53:00	11746745	1.86993e-09	-1.38869e-10	9.41967e-09	-1.47618e-10	3.19996e-10	1.21171e-09	-2.77738e-13	9.37257e-09	-1.4747e-10	1.11039e-10	0.129283	-2.96331e-05	-0.0157342	0.0118472
866	2022-03-31 14:53:12	11758579	1.49126e-09	-1.29255e-10	9.41967e-09	-1.4936e-10	3.05092e-10	9.66336e-10	-2.5851e-13	9.37257e-09	-1.49211e-10	1.05867e-10	0.103103	-2.75815e-05	-0.0159199	0.0112954
867	2022-03-31 14:53:24	11770412	1.28542e-09	-1.2857e-10	9.41967e-09	-1.68237e-10	2.96799e-10	8.32952e-10	-2.5714e-13	9.37257e-09	-1.68069e-10	1.02989e-10	0.0888713	-2.74354e-05	-0.017932	0.0109884
868	2022-03-31 14:53:36	11782245	1.0756e-09	-1.38633e-10	9.41967e-09	-1.58938e-10	2.85665e-10	6.96989e-10	-2.77266e-13	9.37257e-09	-1.58779e-10	9.91258e-11	0.0743647	-2.95827e-05	-0.0169408	0.0105762
869	2022-03-31 14:53:49	11795119	8.61116e-10	-1.39452e-10	9.41967e-09	-1.61787e-10	2.82079e-10	5.58003e-10	-2.78904e-13	9.37257e-09	-1.61625e-10	9.78814e-11	0.0595358	-2.97575e-05	-0.0172445	0.0104434
870	2022-03-31 14:54:03	11809163	7.29708e-10	-1.33269e-10	9.41967e-09	-1.5553e-10	2.77833e-10	4.72851e-10	-2.66538e-13	9.37257e-09	-1.55374e-10	9.64081e-11	0.0504505	-2.84381e-05	-0.0165776	0.0102862
871	2022-03-31 14:54:17	11823206	5.94087e-10	-1.40353e-10	9.41967e-09	-1.52241e-10	2.58045e-10	3.84968e-10	-2.80706e-13	9.37257e-09	-1.52089e-10	8.95416e-11	0.0410739	-2.99497e-05	-0.016227	0.00955358
872	2022-03-31 14:54:31	11837249	4.90253e-10	-1.40845e-10	9.41967e-09	-1.65678e-10	2.57001e-10	3.17684e-10	-2.8169e-13	9.37257e-09	-1.65512e-10	8.91793e-11	0.0338951	-3.00547e-05	-0.0176592	0.00951493
873	2022-03-31 14:54:45	11851293	3.86289e-10	-1.41142e-10	9.41967e-09	-1.57089e-10	2.41176e-10	2.50315e-10	-2.82284e-13	9.37257e-09	-1.56932e-10	8.36881e-11	0.0267072	-3.01181e-05	-0.0167437	0.00892904
874	2022-03-31 14:54:59	11865336	3.01107e-10	-1.29706e-10	9.41967e-09	-1.55186e-10	2.40984e-10	1.95117e-10	-2.59412e-13	9.37257e-09	-1.55031e-10	8.36214e-11	0.0208179	-2.76778e-05	-0.0165409	0.00892193
875	2022-03-31 14:55:13	11879379	2.30221e-10	-1.40384e-10	9.41967e-09	-1.53531e-10	2.38903e-10	1.49183e-10	-2.80768e-13	9.37257e-09	-1.53377e-10	8.28993e-11	0.015917	-2.99563e-05	-0.0163645	0.00884489
876	2022-03-31 14:55:27	11893423	1.85533e-10	-1.40968e-10	9.41967e-09	-1.66173e-10	2.31032e-10	1.20225e-10	-2.81936e-13	9.37257e-09	-1.66007e-10	8.01681e-11	0.0128274	-3.0081e-05	-0.017712	0.00855348
877	2022-03-31 14:55:41	11907466	1.38965e-10	-1.39933e-10	9.41967e-09	-1.6111e-10	2.274e-10	9.00493e-11	-2.79866e-13	9.37257e-09	-1.60949e-10	7.89078e-11	0.00960775	-2.98601e-05	-0.0171723	0.00841901
878	2022-03-31 14:55:55	11921509	1.05091e-10	-1.32143e-10	9.41967e-09	-1.64947e-10	2.28606e-10	6.8099e-11	-2.64286e-13	9.37257e-09	-1.64782e-10	7.93263e-11	0.00726577	-2.81978e-05	-0.0175813	0.00846366
879	2022-03-31 14:56:09	11935552	6.69508e-11	-1.37569e-10	9.41967e-09	-1.75009e-10	2.24889e-10	4.33841e-11	-2.75138e-13	9.37257e-09	-1.74834e-10	7.80365e-11	0.00462884	-2.93557e-05	-0.0186538	0.00832605
880	2022-03-31 14:56:23	11949596	4.01404e-11	-1.41265e-10	9.41967e-09	-1.74536e-10	2.277e-10	2.6011e-11	-2.8253e-13	9.37257e-09	-1.74361e-10	7.90119e-11	0.00277522	-3.01443e-05	-0.0186034	0.00843012
881	2022-03-31 14:56:37	11963639	1.11154e-11	-1.44408e-10	9.41967e-09	-1.67828e-10	2.20421e-10	7.20278e-12	-2.88816e-13	9.37257e-09	-1.6766e-10	7.64861e-11	0.000768496	-3.0815e-05	-0.0178884	0.00816063
882	2022-03-31 14:56:51	11977682	-6.12749e-12	-1.35603e-10	9.41967e-09	-1.73859e-10	2.08549e-10	-3.97061e-12	-2.71206e-13	9.37257e-09	-1.73685e-10	7.23665e-11	-0.000423642	-2.89361e-05	-0.0185312	0.00772109
883	2022-03-31 14:57:05	11991726	-3.04009e-11	-1.34641e-10	9.41967e-09	-1.68344e-10	2.189e-10	-1.96998e-11	-2.69282e-13	9.37257e-09	-1.68176e-10	7.59583e-11	-0.00210185	-2.87309e-05	-0.0179434	0.00810432
884	2022-03-31 14:57:19	12005769	-3.62059e-11	-1.45974e-10	9.41967e-09	-1.56122e-10	2.15906e-10	-2.34614e-11	-2.91948e-13	9.37257e-09	-1.55966e-10	7.49194e-11	-0.0025032	-3.11492e-05	-0.0166407	0.00799347
885	2022-03-31 14:57:33	12019812	-4.21936e-11	-1.33801e-10	9.41967e-09	-1.66936e-10	2.03719e-10	-2.73415e-11	-2.67602e-13	9.37257e-09	-1.66769e-10	7.06905e-11	-0.00291718	-2.85516e-05	-0.0177933	0.00754227
886	2022-03-31 14:57:47	12033856	-6.06299e-11	-1.47233e-10	9.41967e-09	-1.65108e-10	2.17933e-10	-3.92882e-11	-2.94466e-13	9.37257e-09	-1.64943e-10	7.56228e-11	-0.00419182	-3.14178e-05	-0.0175985	0.00806852
887	2022-03-31 14:58:01	12047899	-6.33819e-11	-1.30566e-10	9.41967e-09	-1.64259e-10	2.35777e-10	-4.10715e-11	-2.61132e-13	9.37257e-09	-1.64095e-10	8.18146e-11	-0.00438209	-2.78613e-05	-0.017508	0.00872915
888	2022-03-31 14:58:15	12061942	-5.78026e-11	-1.35193e-10	9.41967e-09	-1.69279e-10	2.55434e-10	-3.74561e-11	-2.70386e-13	9.37257e-09	-1.6911e-10	8.86356e-11	-0.00399635	-2.88486e-05	-0.018043	0.00945691
889	2022-03-31 14:58:29	12075986	-4.16561e-11	-1.36422e-10	9.41967e-09	-1.6599e-10	2.76344e-10	-2.69932e-11	-2.72844e-13	9.37257e-09	-1.65824e-10	9.58914e-11	-0.00288002	-2.91109e-05	-0.0176925	0.0102311
890	2022-03-31 14:58:44	12090029	-1.28462e-11	-1.4579e-10	9.41967e-09	-1.64055e-10	2.9802e-10	-8.32434e-12	-2.9158e-13	9.37257e-09	-1.63891e-10	1.03413e-10	-0.000888159	-3.11099e-05	-0.0174862	0.0110336
891	2022-03-31 14:58:58	12104072	-3.22499e-12	-1.41756e-10	9.41967e-09	-1.54821e-10	3.16226e-10	-2.08979e-12	-2.83512e-13	9.37257e-09	-1.54666e-10	1.0973e-10	-0.000222969	-3.02491e-05	-0.016502	0.0117076
892	2022-03-31 14:59:12	12118115	1.08574e-11	-1.44449e-10	9.41967e-09	-1.58497e-10	3.17884e-10	7.0356e-12	-2.88898e-13	9.37257e-09	-1.58339e-10	1.10306e-10	0.000750658	-3.08238e-05	-0.0168938	0.011769
893	2022-03-31 14:59:26	12132159	8.06248e-12	-1.44746e-10	9.41967e-09	-1.70763e-10	3.19658e-10	5.22449e-12	-2.89492e-13	9.37257e-09	-1.70592e-10	1.10921e-10	0.000557423	-3.08871e-05	-0.0182012	0.0118347
894	2022-03-31 14:59:40	12146202	1.23947e-11	-1.3077e-10	9.41967e-09	-1.73966e-10	3.20026e-10	8.03177e-12	-2.6154e-13	9.37257e-09	-1.73792e-10	1.11049e-10	0.000856944	-2.79048e-05	-0.0185426	0.0118483
895	2022-03-31 14:59:54	12160245	1.37062e-11	-1.42831e-10	9.41967e-09	-1.76149e-10	3.17884e-10	8.88162e-12	-2.85662e-13	9.37257e-09	-1.75973e-10	1.10306e-10	0.000947618	-3.04785e-05	-0.0187753	0.011769
896	2022-03-31 15:00:08	12174289	-1.24699e-12	-1.25887e-10	9.41967e-09	-1.54187e-10	3.09706e-10	-8.0805e-13	-2.51774e-13	9.37257e-09	-1.54033e-10	1.07468e-10	-8.62143e-05	-2.68629e-05	-0.0164344	0.0114662
897	2022-03-31 15:00:22	12188332	-1.29537e-11	-1.42831e-10	9.41967e-09	-1.72494e-10	3.11273e-10	-8.394e-12	-2.85662e-13	9.37257e-09	-1.72322e-10	1.08012e-10	-0.000895592	-3.04785e-05	-0.0183857	0.0115242
898	2022-03-31 15:00:36	12202375	-2.29082e-11	-1.42964e-10	9.41967e-09	-1.6484e-10	3.06727e-10	-1.48445e-11	-2.85928e-13	9.37257e-09	-1.64675e-10	1.06434e-10	-0.00158383	-3.05069e-05	-0.0175699	0.0113559
899	2022-03-31 15:00:50	12216419	-2.21127e-11	-1.54523e-10	9.41967e-09	-1.70967e-10	2.97406e-10	-1.4329e-11	-3.09046e-13	9.37257e-09	-1.70796e-10	1.032e-10	-0.00152883	-3.29734e-05	-0.018223	0.0110108
900	2022-03-31 15:01:04	12230462	-3.33034e-11	-1.40661e-10	9.41967e-09	-1.71225e-10	2.92199e-10	-2.15806e-11	-2.81322e-13	9.37257e-09	-1.71054e-10	1.01393e-10	-0.00230253	-3.00155e-05	-0.0182505	0.0108181
901	2022-03-31 15:01:18	12244505	-6.10169e-11	-1.40702e-10	9.41967e-09	-1.74536e-10	2.63236e-10	-3.9539e-11	-2.81404e-13	9.37257e-09	-1.74361e-10	9.13429e-11	-0.00421858	-3.00242e-05	-0.0186034	0.00974577
902	2022-03-31 15:01:32	12258549	-5.82111e-11	-1.39504e-10	9.41967e-09	-1.69559e-10	2.72781e-10	-3.77208e-11	-2.79008e-13	9.37257e-09	-1.69389e-10	9.4655e-11	-0.00402459	-2.97686e-05	-0.0180729	0.0100992
903	2022-03-31 15:01:46	12272592	-6.45536e-11	-1.48339e-10	9.41967e-09	-1.63453e-10	2.63919e-10	-4.18307e-11	-2.96678e-13	9.37257e-09	-1.6329e-10	9.15799e-11	-0.0044631	-3.16539e-05	-0.0174221	0.00977105
904	2022-03-31 15:02:00	12286635	-6.40161e-11	-1.43578e-10	9.41967e-09	-1.78105e-10	2.69694e-10	-4.14824e-11	-2.87156e-13	9.37257e-09	-1.77927e-10	9.35838e-11	-0.00442594	-3.06379e-05	-0.0189838	0.00998486
905	2022-03-31 15:02:14	12300679	-6.40699e-11	-1.43446e-10	9.41967e-09	-1.70462e-10	2.57584e-10	-4.15173e-11	-2.86892e-13	9.37257e-09	-1.70292e-10	8.93816e-11	-0.00442966	-3.06097e-05	-0.0181691	0.00953651
906	2022-03-31 15:02:28	12314722	-6.69616e-11	-1.34825e-10	9.41967e-09	-1.71881e-10	2.50796e-10	-4.33911e-11	-2.6965e-13	9.37257e-09	-1.71709e-10	8.70262e-11	-0.00462958	-2.87701e-05	-0.0183204	0.0092852
907	2022-03-31 15:02:42	12328765	-6.13824e-11	-1.4189e-10	9.41967e-09	-1.65345e-10	2.63282e-10	-3.97758e-11	-2.8378e-13	9.37257e-09	-1.6518e-10	9.13589e-11	-0.00424385	-3.02777e-05	-0.0176237	0.00974747
908	2022-03-31 15:02:56	12342809	-6.29196e-11	-1.37006e-10	9.41967e-09	-1.73042e-10	2.55726e-10	-4.07719e-11	-2.74012e-13	9.37257e-09	-1.72869e-10	8.87369e-11	-0.00435013	-2.92355e-05	-0.0184441	0.00946772
909	2022-03-31 15:03:10	12356852	-6.42956e-11	-1.45985e-10	9.41967e-09	-1.72913e-10	2.36852e-10	-4.16635e-11	-2.9197e-13	9.37257e-09	-1.7274e-10	8.21876e-11	-0.00444526	-3.11515e-05	-0.0184304	0.00876895
910	2022-03-31 15:03:24	12370895	-7.94316e-11	-1.33187e-10	9.41967e-09	-1.74343e-10	2.38649e-10	-5.14717e-11	-2.66374e-13	9.37257e-09	-1.74169e-10	8.28112e-11	-0.00549173	-2.84206e-05	-0.0185828	0.00883548
911	2022-03-31 15:03:38	12384939	-6.47256e-11	-1.46087e-10	9.41967e-09	-1.70354e-10	2.29059e-10	-4.19422e-11	-2.92174e-13	9.37257e-09	-1.70184e-10	7.94835e-11	-0.00447499	-3.11733e-05	-0.0181576	0.00848043
912	2022-03-31 15:03:52	12398982	-6.95738e-11	-1.41326e-10	9.41967e-09	-1.6914e-10	2.35555e-10	-4.50838e-11	-2.82652e-13	9.37257e-09	-1.68971e-10	8.17376e-11	-0.00481019	-3.01574e-05	-0.0180282	0.00872093
913	2022-03-31 15:04:07	12413025	-8.07001e-11	-1.29777e-10	9.41967e-09	-1.73407e-10	2.22931e-10	-5.22937e-11	-2.59554e-13	9.37257e-09	-1.73234e-10	7.73571e-11	-0.00557944	-2.76929e-05	-0.018483	0.00825356

## Sheet: integration
index	Real time	ms	Ethylene mbar	Carbon monoxide mbar	Argon mbar	Ethylene oxide mbar	Carbon dioxide mbar	Corrected Et	Corrected CO	Corrected Ar	Corrected EtO	Corrected CO2	ĉ Et	ĉ CO	ĉ EtO	ĉ CO2		Time, min	Actual time	6.42981e+07	ĉ Et Integral	ĉ CO Integral	ĉ EtO Integral	ĉ CO2 Integral
1	2022-03-31 11:37:28	14288	1.00447e-10	9.81524e-11	5.96178e-09	-8.33123e-12	5.03974e-10	6.50897e-11	1.96305e-13	5.93197e-09	-8.3229e-12	1.74879e-10	0.0109727	3.30927e-05	-0.00140306	0.0294808		0	0		0	0	0	0
2	2022-03-31 11:38:26	72696	5.96194e-11	7.30179e-11	6.52103e-09	8.50323e-12	4.90352e-10	3.86334e-11	1.46036e-13	6.48842e-09	8.49473e-12	1.70152e-10	0.0059542	2.25071e-05	0.00130921	0.026224		0.966667	0.966667		0.00818133	2.68732e-05	-4.53586e-05	0.0269239
3	2022-03-31 11:38:53	99741	6.16189e-11	6.5841e-11	6.73541e-09	2.81649e-12	4.76055e-10	3.9929e-11	1.31682e-13	6.70173e-09	2.81367e-12	1.65191e-10	0.00595802	1.96489e-05	0.000419843	0.024649		1.41667	1.41667		0.0108616	3.63584e-05	0.000343679	0.0383704
4	2022-03-31 11:39:07	113784	5.06431e-11	6.38855e-11	9.41967e-09	2.23599e-12	5.26641e-10	3.28167e-11	1.27771e-13	9.37257e-09	2.23375e-12	1.82744e-10	0.00350136	1.36324e-05	0.000238329	0.0194978		1.65	1.65		0.0119652	4.02412e-05	0.000420465	0.0435208
5	2022-03-31 11:39:21	127827	5.53624e-11	6.31484e-11	9.41967e-09	-6.39624e-12	4.95029e-10	3.58748e-11	1.26297e-13	9.37257e-09	-6.38984e-12	1.71775e-10	0.00382764	1.34751e-05	-0.00068176	0.0183274		1.88333	1.88333		0.0128202	4.34037e-05	0.000368732	0.0479338
6	2022-03-31 11:39:35	141871	4.50854e-11	3.98977e-11	9.41967e-09	1.52757e-11	4.84371e-10	2.92153e-11	7.97954e-14	9.37257e-09	1.52604e-11	1.68077e-10	0.00311711	8.51371e-06	0.0016282	0.0179328		2.11667	2.11667		0.0136304	4.59691e-05	0.00047915	0.0521641
7	2022-03-31 11:39:49	155914	3.25079e-11	4.7003e-11	9.41967e-09	1.16744e-11	4.42876e-10	2.10651e-11	9.4006e-14	9.37257e-09	1.16627e-11	1.53678e-10	0.00224753	1.00299e-05	0.00124435	0.0163966		2.35	2.35		0.0142563	4.81325e-05	0.00081428	0.0561692
8	2022-03-31 11:40:03	169957	4.37094e-11	4.18123e-11	9.41967e-09	1.81459e-11	4.35643e-10	2.83237e-11	8.36246e-14	9.37257e-09	1.81278e-11	1.51168e-10	0.00302198	8.92227e-06	0.00193413	0.0161288		2.58333	2.58333		0.0148711	5.03436e-05	0.0011851	0.0599638
9	2022-03-31 11:40:18	184000	2.99709e-11	4.17201e-11	9.41967e-09	1.64582e-11	4.14043e-10	1.94211e-11	8.34402e-14	9.37257e-09	1.64417e-11	1.43673e-10	0.00207213	8.90259e-06	0.00175424	0.0153291		2.83333	2.83333		0.0155079	5.25717e-05	0.00164615	0.0638961
10	2022-03-31 11:40:32	198044	2.10054e-11	3.6601e-11	9.41967e-09	3.29487e-11	4.08844e-10	1.36115e-11	7.3202e-14	9.37257e-09	3.29158e-11	1.41869e-10	0.00145227	7.81024e-06	0.00351192	0.0151366		3.06667	3.06667		0.015919	5.45215e-05	0.00226053	0.0674504
11	2022-03-31 11:40:46	212087	2.00057e-11	3.04685e-11	9.41967e-09	2.72297e-11	4.03055e-10	1.29637e-11	6.0937e-14	9.37257e-09	2.72025e-11	1.3986e-10	0.00138315	6.50163e-06	0.00290235	0.0149223		3.3	3.3		0.0162498	5.61913e-05	0.00300887	0.0709573
12	2022-03-31 11:41:00	226130	2.91002e-11	4.13413e-11	9.41967e-09	2.74124e-11	9.99386e-10	1.88569e-11	8.26826e-14	9.37257e-09	2.7385e-11	3.46787e-10	0.00201193	8.82176e-06	0.00292182	0.0370002		3.53333	3.53333		0.0166459	5.7979e-05	0.00368835	0.0770149
13	2022-03-31 11:41:17	243425	8.64093e-09	6.26672e-11	9.41967e-09	1.67463e-10	5.07589e-09	5.59932e-09	1.25334e-13	9.37257e-09	1.67296e-10	1.76133e-09	0.597416	1.33725e-05	0.0178495	0.187924		3.81667	3.81667		0.101565	6.11232e-05	0.00663095	0.108879
14	2022-03-31 11:41:30	256298	1.13036e-08	6.80831e-11	9.41967e-09	1.98788e-10	6.03155e-09	7.32473e-09	1.36166e-13	9.37257e-09	1.98589e-10	2.09295e-09	0.781507	1.45282e-05	0.0211883	0.223306		4.03333	4.03333		0.250948	6.41457e-05	0.0108601	0.153429
15	2022-03-31 11:41:39	265922	1.13036e-08	6.93117e-11	9.41967e-09	2.13999e-10	6.74033e-09	7.32473e-09	1.38623e-13	9.37257e-09	2.13785e-10	2.33889e-09	0.781507	1.47903e-05	0.0228096	0.249547		4.18333	4.18333		0.368174	6.63446e-05	0.0141599	0.188893
16	2022-03-31 11:41:49	275545	1.13036e-08	6.35374e-11	9.41967e-09	2.52613e-10	6.89534e-09	7.32473e-09	1.27075e-13	9.37257e-09	2.5236e-10	2.39268e-09	0.781507	1.35582e-05	0.0269254	0.255286		4.35	4.35		0.498425	6.8707e-05	0.0183045	0.230962
17	2022-03-31 11:41:59	285168	1.13036e-08	5.62377e-11	9.41967e-09	2.50764e-10	6.68219e-09	7.32473e-09	1.12475e-13	9.37257e-09	2.50513e-10	2.31872e-09	0.781507	1.20005e-05	0.0267283	0.247394		4.51667	4.51667		0.628677	7.08369e-05	0.0227756	0.272852
18	2022-03-31 11:42:08	294791	1.13036e-08	6.63734e-11	9.41967e-09	2.26942e-10	6.27649e-09	7.32473e-09	1.32747e-13	9.37257e-09	2.26715e-10	2.17794e-09	0.781507	1.41633e-05	0.0241892	0.232374		4.66667	4.66667		0.745903	7.27992e-05	0.0265944	0.308835
19	2022-03-31 11:42:18	304414	1.13036e-08	5.91249e-11	9.41967e-09	2.45121e-10	5.66524e-09	7.32473e-09	1.1825e-13	9.37257e-09	2.44876e-10	1.96584e-09	0.781507	1.26166e-05	0.0261269	0.209744		4.83333	4.83333		0.876154	7.50308e-05	0.0307875	0.345678
20	2022-03-31 11:42:28	314038	1.13036e-08	7.14515e-11	9.41967e-09	2.41734e-10	5.07274e-09	7.32473e-09	1.42903e-13	9.37257e-09	2.41492e-10	1.76024e-09	0.781507	1.52469e-05	0.0257658	0.187808		5	5		1.00641	7.73528e-05	0.0351118	0.378807
21	2022-03-31 11:42:37	323661	1.13036e-08	6.00053e-11	9.41967e-09	2.26383e-10	4.51446e-09	7.32473e-09	1.20011e-13	9.37257e-09	2.26157e-10	1.56652e-09	0.781507	1.28044e-05	0.0241296	0.167139		5.15	5.15		1.12363	7.94567e-05	0.038854	0.405428
22	2022-03-31 11:42:47	333284	1.13036e-08	6.36604e-11	9.41967e-09	2.19084e-10	4.03045e-09	7.32473e-09	1.27321e-13	9.37257e-09	2.18865e-10	1.39857e-09	0.781507	1.35844e-05	0.0233516	0.149219		5.31667	5.31667		1.25388	8.16557e-05	0.0428108	0.431792
23	2022-03-31 11:42:56	342907	1.13036e-08	6.00668e-11	9.41967e-09	2.09646e-10	3.60065e-09	7.32473e-09	1.20134e-13	9.37257e-09	2.09436e-10	1.24943e-09	0.781507	1.28176e-05	0.0223457	0.133307		5.46667	5.46667		1.37111	8.36359e-05	0.0462381	0.452981
24	2022-03-31 11:43:06	352530	1.13036e-08	9.27262e-11	9.41967e-09	2.12376e-10	3.24313e-09	7.32473e-09	1.85452e-13	9.37257e-09	2.12164e-10	1.12537e-09	0.781507	1.97867e-05	0.0226366	0.12007		5.63333	5.63333		1.50136	8.63529e-05	0.0499866	0.474096
25	2022-03-31 11:43:16	362153	1.13036e-08	4.88049e-11	9.41967e-09	1.99928e-10	2.89686e-09	7.32473e-09	9.76098e-14	9.37257e-09	1.99728e-10	1.00521e-09	0.781507	1.04144e-05	0.0213098	0.10725		5.8	5.8		1.63161	8.88697e-05	0.0536488	0.493039
26	2022-03-31 11:43:25	371777	1.13036e-08	5.48863e-11	9.41967e-09	1.95176e-10	2.54745e-09	7.32473e-09	1.09773e-13	9.37257e-09	1.94981e-10	8.83965e-10	0.781507	1.17121e-05	0.0208033	0.094314		5.95	5.95		1.74884	9.05291e-05	0.0568073	0.508156
27	2022-03-31 11:43:35	381400	1.12549e-08	4.49144e-11	9.41967e-09	1.29548e-10	1.86846e-09	7.29318e-09	8.98288e-14	9.37257e-09	1.29418e-10	6.48356e-10	0.77814	9.58422e-06	0.0138082	0.0691759		6.11667	6.11667		1.87881	9.23038e-05	0.0596916	0.521781
28	2022-03-31 11:43:45	391023	7.35645e-09	4.88868e-11	9.41967e-09	9.9448e-11	1.60102e-09	4.76698e-09	9.77736e-14	9.37257e-09	9.93486e-11	5.55554e-10	0.50861	1.04319e-05	0.0105999	0.0592744		6.28333	6.28333		1.98604	9.39718e-05	0.0617256	0.532485
29	2022-03-31 11:43:54	400647	5.53883e-09	4.22525e-11	9.41967e-09	8.30973e-11	1.42004e-09	3.58916e-09	8.4505e-14	9.37257e-09	8.30142e-11	4.92754e-10	0.382943	9.0162e-06	0.00885714	0.052574		6.43333	6.43333		2.0529	9.54305e-05	0.0631849	0.540873
30	2022-03-31 11:44:04	410270	4.25227e-09	5.42209e-11	9.41967e-09	6.05439e-11	1.28591e-09	2.75547e-09	1.08442e-13	9.37257e-09	6.04834e-11	4.46211e-10	0.293993	1.15701e-05	0.00645323	0.0476081		6.6	6.6		2.10931	9.7146e-05	0.0644608	0.549222
31	2022-03-31 11:44:13	419893	3.27973e-09	4.55594e-11	9.41967e-09	5.78994e-11	1.15964e-09	2.12527e-09	9.11188e-14	9.37257e-09	5.78415e-11	4.02395e-10	0.226754	9.72186e-06	0.00617136	0.0429333		6.75	6.75		2.14837	9.87429e-05	0.0654076	0.556012
32	2022-03-31 11:44:23	429516	2.57734e-09	3.42463e-11	9.41967e-09	5.17504e-11	1.07948e-09	1.67012e-09	6.84926e-14	9.37257e-09	5.16986e-11	3.7458e-10	0.178192	7.30777e-06	0.00551595	0.0399655		6.91667	6.91667		2.18212	0.000100162	0.0663815	0.562921
33	2022-03-31 11:44:33	439139	2.04357e-09	3.34887e-11	9.41967e-09	3.44321e-11	9.86114e-10	1.32423e-09	6.69774e-14	9.37257e-09	3.43977e-11	3.42182e-10	0.141288	7.14611e-06	0.00367004	0.0365088		7.08333	7.08333		2.20874	0.000101367	0.067147	0.569294
34	2022-03-31 11:44:42	448762	1.62576e-09	3.56285e-11	9.41967e-09	3.02719e-11	9.28829e-10	1.05349e-09	7.1257e-14	9.37257e-09	3.02416e-11	3.22304e-10	0.112402	7.60272e-06	0.00322661	0.034388		7.23333	7.23333		2.22777	0.000102473	0.0676643	0.574611
35	2022-03-31 11:44:52	458385	1.31006e-09	3.93551e-11	9.41967e-09	2.83477e-11	8.54136e-10	8.48919e-10	7.87102e-14	9.37257e-09	2.83194e-11	2.96385e-10	0.0905748	8.39793e-06	0.00302151	0.0316226		7.4	7.4		2.24468	0.000103806	0.068185	0.580112
36	2022-03-31 11:45:02	468008	1.03754e-09	2.41926e-11	9.41967e-09	2.96592e-11	8.19286e-10	6.72326e-10	4.83852e-14	9.37257e-09	2.96295e-11	2.84292e-10	0.0717333	5.16243e-06	0.0031613	0.0303324		7.56667	7.56667		2.25821	0.000104936	0.0687002	0.585275
37	2022-03-31 11:45:12	478672	7.69817e-10	3.00999e-11	9.41967e-09	1.75224e-11	7.41871e-10	4.98841e-10	6.01998e-14	9.37257e-09	1.75049e-11	2.57429e-10	0.0532235	6.42298e-06	0.00186767	0.0274662		7.73333	7.73333		2.26862	0.000105902	0.0691193	0.590091
38	2022-03-31 11:45:24	490505	5.82885e-10	3.38266e-11	9.41967e-09	4.45049e-12	7.25643e-10	3.77709e-10	6.76532e-14	9.37257e-09	4.44604e-12	2.51798e-10	0.0402994	7.21821e-06	0.000474367	0.0268654		7.93333	7.93333		2.27797	0.000107266	0.0693535	0.595524
39	2022-03-31 11:45:36	502339	4.48424e-10	3.3591e-11	9.41967e-09	5.09549e-12	8.11643e-10	2.90579e-10	6.7182e-14	9.37257e-09	5.09039e-12	2.8164e-10	0.0310031	7.16794e-06	0.000543116	0.0300494		8.13333	8.13333		2.2851	0.000108704	0.0694552	0.601216
40	2022-03-31 11:45:48	514172	3.09986e-10	1.99232e-11	9.41967e-09	2.79499e-13	9.54164e-10	2.00871e-10	3.98464e-14	9.37257e-09	2.7922e-13	3.31095e-10	0.0214318	4.25138e-06	2.97911e-05	0.0353259		8.33333	8.33333		2.29035	0.000109846	0.0695125	0.607753
41	2022-03-31 11:46:00	526005	2.12967e-10	2.23497e-11	9.41967e-09	-5.49324e-12	1.03293e-09	1.38003e-10	4.46994e-14	9.37257e-09	-5.48775e-12	3.58427e-10	0.0147241	4.76917e-06	-0.000585511	0.0382421		8.53333	8.53333		2.29396	0.000110748	0.0694569	0.61511
42	2022-03-31 11:46:11	537839	1.51779e-10	3.60994e-11	9.41967e-09	-1.12229e-11	1.05128e-09	9.83528e-11	7.21988e-14	9.37257e-09	-1.12117e-11	3.64794e-10	0.0104937	7.7032e-06	-0.00119622	0.0389215		8.71667	8.71667		2.29627	0.000111892	0.0692936	0.622183
43	2022-03-31 11:46:23	549672	1.1424e-10	2.53085e-11	9.41967e-09	-1.29429e-11	1.05852e-09	7.40275e-11	5.0617e-14	9.37257e-09	-1.293e-11	3.67306e-10	0.00789831	5.40055e-06	-0.00137955	0.0391895		8.91667	8.91667		2.29811	0.000113202	0.069036	0.629995
44	2022-03-31 11:46:35	561505	8.09688e-11	3.07551e-11	9.41967e-09	-1.91564e-11	1.04119e-09	5.24678e-11	6.15102e-14	9.37257e-09	-1.91372e-11	3.61293e-10	0.00559801	6.56279e-06	-0.00204183	0.0385479		9.11667	9.11667		2.29946	0.000114398	0.0686939	0.637768
45	2022-03-31 11:46:47	573339	5.87701e-11	2.86359e-11	9.41967e-09	-1.68667e-11	1.00721e-09	3.8083e-11	5.72718e-14	9.37257e-09	-1.68498e-11	3.49502e-10	0.00406324	6.11057e-06	-0.00179778	0.0372899		9.31667	9.31667		2.30043	0.000115666	0.0683099	0.645352
46	2022-03-31 11:46:59	585172	5.12559e-11	1.46711e-11	9.41967e-09	-2.22524e-11	9.63764e-10	3.32138e-11	2.93422e-14	9.37257e-09	-2.22301e-11	3.34426e-10	0.00354373	3.13065e-06	-0.00237183	0.0356814		9.51667	9.51667		2.30119	0.00011659	0.067893	0.652649
47	2022-03-31 11:47:11	597005	3.84204e-11	1.55926e-11	9.41967e-09	-2.46067e-11	9.39921e-10	2.48964e-11	3.11852e-14	9.37257e-09	-2.45821e-11	3.26153e-10	0.00265631	3.32728e-06	-0.00262277	0.0347986		9.71667	9.71667		2.30181	0.000117236	0.0673935	0.659697
48	2022-03-31 11:47:22	608839	4.01941e-11	1.93192e-11	9.41967e-09	-2.29834e-11	9.027e-10	2.60458e-11	3.86384e-14	9.37257e-09	-2.29604e-11	3.13237e-10	0.00277894	4.1225e-06	-0.00244975	0.0334206		9.9	9.9		2.30231	0.000117918	0.0669285	0.665951
49	2022-03-31 11:47:34	620672	1.83287e-11	3.28949e-11	9.41967e-09	-2.68857e-11	8.62814e-10	1.1877e-11	6.57898e-14	9.37257e-09	-2.68588e-11	2.99396e-10	0.00126721	7.0194e-06	-0.00286568	0.0319439		10.1	10.1		2.30271	0.000119033	0.066397	0.672487
50	2022-03-31 11:47:46	632505	1.77697e-11	1.14973e-11	9.41967e-09	-3.61414e-11	8.35064e-10	1.15148e-11	2.29946e-14	9.37257e-09	-3.61053e-11	2.89767e-10	0.00122856	2.45339e-06	-0.00385223	0.0309165		10.3	10.3		2.30296	0.00011998	0.0657252	0.678773
51	2022-03-31 11:47:58	644339	2.49399e-11	1.69132e-11	9.41967e-09	-2.47464e-11	8.02036e-10	1.61611e-11	3.38264e-14	9.37257e-09	-2.47217e-11	2.78306e-10	0.00172429	3.60908e-06	-0.00263766	0.0296937		10.5	10.5		2.30326	0.000120586	0.0650762	0.684834
52	2022-03-31 11:48:10	656172	1.77374e-11	6.24522e-12	9.12658e-09	-2.66277e-11	7.77221e-10	1.14938e-11	1.24904e-14	9.08095e-09	-2.66011e-11	2.69696e-10	0.00126571	1.37546e-06	-0.00292933	0.0296991		10.7	10.7		2.30356	0.000121085	0.0645195	0.690773
53	2022-03-31 11:48:22	668005	2.05217e-11	2.1807e-11	8.56242e-09	-2.90142e-11	7.64229e-10	1.32981e-11	4.3614e-14	8.51961e-09	-2.89852e-11	2.65187e-10	0.00156088	5.11925e-06	-0.00340217	0.0311267		10.9	10.9		2.30384	0.000121734	0.0638864	0.696856
54	2022-03-31 11:48:33	679839	1.14272e-11	1.62478e-11	8.18117e-09	-3.70766e-11	7.41793e-10	7.40483e-12	3.24956e-14	8.14026e-09	-3.70395e-11	2.57402e-10	0.000909654	3.99196e-06	-0.00455016	0.0316209		11.0833	11.0833		2.30406	0.000122569	0.0631574	0.702608
55	2022-03-31 11:48:45	691672	6.96598e-12	1.0279e-11	7.90745e-09	-3.90546e-11	6.87591e-10	4.51396e-12	2.0558e-14	7.86791e-09	-3.90155e-11	2.38594e-10	0.000573717	2.61289e-06	-0.00495882	0.030325		11.2833	11.2833		2.30421	0.00012323	0.0622065	0.708802
56	2022-03-31 11:48:57	703505	-7.19173e-12	5.14975e-12	7.68913e-09	-3.68294e-11	6.75183e-10	-4.66024e-12	1.02995e-14	7.65068e-09	-3.67926e-11	2.34289e-10	-0.000609127	1.34622e-06	-0.00480906	0.0306232		11.4833	11.4833		2.30421	0.000123626	0.0612297	0.714897
57	2022-03-31 11:49:09	715339	-1.34159e-11	1.02585e-11	7.54657e-09	-3.88181e-11	6.63988e-10	-8.6935e-12	2.0517e-14	7.50884e-09	-3.87793e-11	2.30404e-10	-0.00115777	2.73238e-06	-0.00516449	0.0306844		11.6833	11.6833		2.30403	0.000124034	0.0602324	0.721028
58	2022-03-31 11:49:21	727172	1.02124e-12	7.09498e-12	7.41713e-09	-4.06026e-11	6.52224e-10	6.61764e-13	1.419e-14	7.38004e-09	-4.0562e-11	2.26322e-10	8.96693e-05	1.92275e-06	-0.00549617	0.0306667		11.8833	11.8833		2.30393	0.000124499	0.0591663	0.727163
59	2022-03-31 11:49:33	739005	1.47274e-12	1.22856e-11	7.33947e-09	-4.32364e-11	6.31607e-10	9.54336e-13	2.45712e-14	7.30277e-09	-4.31932e-11	2.19168e-10	0.000130681	3.36464e-06	-0.00591463	0.0300116		12.0833	12.0833		2.30395	0.000125028	0.0580252	0.733231
60	2022-03-31 11:49:48	754089	-5.90174e-12	1.50909e-11	7.22958e-09	-3.68616e-11	6.12626e-10	-3.82433e-12	3.01818e-14	7.19343e-09	-3.68247e-11	2.12581e-10	-0.000531642	4.19574e-06	-0.00511922	0.0295521		12.3333	12.3333		2.3039	0.000125973	0.056646	0.740676
61	2022-03-31 11:50:02	768133	-6.26724e-12	5.52856e-13	7.13166e-09	-4.33224e-11	5.95902e-10	-4.06117e-12	1.10571e-15	7.096e-09	-4.32791e-11	2.06778e-10	-0.000572318	1.55822e-07	-0.00609908	0.0291401		12.5667	12.5667		2.30377	0.00012648	0.0553372	0.747524
62	2022-03-31 11:50:16	782176	3.00999e-13	8.34403e-12	7.08513e-09	-4.43974e-11	5.79785e-10	1.95047e-13	1.66881e-14	7.0497e-09	-4.4353e-11	2.01185e-10	2.76675e-05	2.3672e-06	-0.00629147	0.0285381		12.8	12.8		2.30371	0.000126775	0.0538916	0.754253
63	2022-03-31 11:50:30	796219	5.64374e-12	-4.19761e-13	7.08277e-09	-3.84096e-11	5.60511e-10	3.65714e-12	-8.39522e-16	7.04736e-09	-3.83712e-11	1.94497e-10	0.000518938	-1.19126e-07	-0.00544476	0.0275986		13.0333	13.0333		2.30377	0.000127037	0.0525224	0.760802
64	2022-03-31 11:50:44	810263	-8.09473e-12	1.26337e-11	7.01172e-09	-4.58486e-11	5.50314e-10	-5.24539e-12	2.52674e-14	6.97666e-09	-4.58028e-11	1.90959e-10	-0.000751847	3.6217e-06	-0.00656514	0.0273711		13.2667	13.2667		2.30374	0.000127446	0.0511212	0.767215
65	2022-03-31 11:50:58	824306	-1.27064e-11	-3.99285e-13	6.94359e-09	-4.23119e-11	5.46084e-10	-8.23375e-12	-7.9857e-16	6.90887e-09	-4.22696e-11	1.89491e-10	-0.00119176	-1.15586e-07	-0.00611816	0.0274272		13.5	13.5		2.30352	0.000127855	0.0496415	0.773609
66	2022-03-31 11:51:12	838349	-9.26648e-12	-3.83928e-12	6.94598e-09	-3.46686e-11	5.29774e-10	-6.00468e-12	-7.67856e-15	6.91125e-09	-3.46339e-11	1.83832e-10	-0.000868827	-1.11102e-06	-0.00501124	0.0265989		13.7333	13.7333		2.30327	0.000127712	0.0483431	0.779912
67	2022-03-31 11:51:26	852393	-2.46174e-11	-1.03507e-11	6.86784e-09	-5.30726e-11	5.19976e-10	-1.59521e-11	-2.07014e-14	6.8335e-09	-5.30195e-11	1.80432e-10	-0.00233439	-3.0294e-06	-0.00775877	0.026404		13.9667	13.9667		2.3029	0.000127229	0.0468533	0.786095
68	2022-03-31 11:51:40	866436	-4.00974e-12	-5.68213e-12	6.84184e-09	-4.98154e-11	5.17335e-10	-2.59831e-12	-1.13643e-14	6.80763e-09	-4.97656e-11	1.79515e-10	-0.000381676	-1.66934e-06	-0.00731026	0.0263697		14.2	14.2		2.30258	0.00012668	0.0450952	0.792252
69	2022-03-31 11:51:54	880479	-1.57487e-11	3.07142e-13	6.8342e-09	-4.25699e-11	5.13811e-10	-1.02052e-11	6.14284e-16	6.80003e-09	-4.25273e-11	1.78292e-10	-0.00150075	9.03355e-08	-0.00625399	0.0262194		14.4333	14.4333		2.30236	0.000126496	0.0435127	0.798388
70	2022-03-31 11:52:08	894523	-1.34697e-11	-8.31331e-12	6.77188e-09	-5.39971e-11	5.00834e-10	-8.72837e-12	-1.66266e-14	6.73802e-09	-5.39431e-11	1.73789e-10	-0.00129539	-2.46758e-06	-0.00800578	0.0257924		14.6667	14.6667		2.30204	0.000126219	0.0418491	0.804456
71	2022-03-31 11:52:22	908566	-2.19622e-11	1.95547e-12	6.72308e-09	-4.38169e-11	4.85884e-10	-1.42315e-11	3.91094e-15	6.68946e-09	-4.37731e-11	1.68602e-10	-0.00212745	5.84642e-07	-0.00654359	0.0252041		14.9	14.9		2.30164	0.000125999	0.0401516	0.810405
72	2022-03-31 11:52:36	922609	-2.15644e-11	8.7945e-12	6.70339e-09	-5.29544e-11	4.84271e-10	-1.39737e-11	1.7589e-14	6.66987e-09	-5.29014e-11	1.68042e-10	-0.00209505	2.63708e-06	-0.0079314	0.0251942		15.1333	15.1333		2.30115	0.000126375	0.0384629	0.816285
73	2022-03-31 11:52:50	936653	-2.25642e-11	-1.09342e-11	6.70123e-09	-4.84609e-11	4.72093e-10	-1.46216e-11	-2.18684e-14	6.66772e-09	-4.84124e-11	1.63816e-10	-0.00219289	-3.27974e-06	-0.00726071	0.0245685		15.3667	15.3667		2.30065	0.0001263	0.0366905	0.822091
74	2022-03-31 11:53:04	950696	-2.36284e-11	-1.8019e-11	6.64242e-09	-5.79639e-11	4.68454e-10	-1.53112e-11	-3.6038e-14	6.60921e-09	-5.79059e-11	1.62554e-10	-0.00231665	-5.4527e-06	-0.0087614	0.024595		15.6	15.6		2.30012	0.000125281	0.0348212	0.827826
75	2022-03-31 11:53:18	964739	-1.43404e-11	-6.32712e-12	6.61247e-09	-5.52226e-11	4.61504e-10	-9.29258e-12	-1.26542e-14	6.57941e-09	-5.51674e-11	1.60142e-10	-0.00141237	-1.92331e-06	-0.00838485	0.0243399		15.8333	15.8333		2.29968	0.000124421	0.0328208	0.833535
76	2022-03-31 11:53:32	978783	-1.38674e-11	-1.48247e-11	6.60114e-09	-5.00411e-11	4.5282e-10	-8.98608e-12	-2.96494e-14	6.56813e-09	-4.99911e-11	1.57129e-10	-0.00136813	-4.51413e-06	-0.00761115	0.0239229		16.0667	16.0667		2.29936	0.00012367	0.0309546	0.839166
77	2022-03-31 11:53:46	992826	-2.37252e-11	-1.49885e-11	6.56555e-09	-5.92969e-11	4.49288e-10	-1.53739e-11	-2.9977e-14	6.53272e-09	-5.92376e-11	1.55903e-10	-0.00235337	-4.58875e-06	-0.00906783	0.0238649		16.3	16.3		2.29893	0.000122608	0.0290088	0.844741
78	2022-03-31 11:54:00	1006869	-2.61869e-11	-6.78784e-12	6.53765e-09	-5.09011e-11	4.40749e-10	-1.69691e-11	-1.35757e-14	6.50496e-09	-5.08502e-11	1.5294e-10	-0.00260864	-2.08697e-06	-0.00781714	0.0235113		16.5333	16.5333		2.29835	0.000121829	0.0270388	0.850269
79	2022-03-31 11:54:14	1020913	-2.78854e-11	-1.63399e-11	6.52577e-09	-5.16536e-11	4.37033e-10	-1.80697e-11	-3.26798e-14	6.49314e-09	-5.16019e-11	1.5165e-10	-0.0027829	-5.03297e-06	-0.00794715	0.0233555		16.7667	16.7667		2.29772	0.000120998	0.0251997	0.855736
80	2022-03-31 11:54:28	1034956	-2.24567e-11	-2.00666e-11	6.54582e-09	-6.69508e-11	4.32164e-10	-1.45519e-11	-4.01332e-14	6.51309e-09	-6.68838e-11	1.49961e-10	-0.00223426	-6.16193e-06	-0.0102691	0.0230245		17	17		2.29713	0.000119692	0.0230744	0.861147
81	2022-03-31 11:54:42	1048999	-2.29942e-11	-1.5439e-11	6.38298e-09	-4.91704e-11	4.28018e-10	-1.49002e-11	-3.0878e-14	6.35107e-09	-4.91212e-11	1.48522e-10	-0.0023461	-4.86186e-06	-0.00773433	0.0233854		17.2333	17.2333		2.2966	0.000118406	0.020974	0.866562
82	2022-03-31 11:54:57	1063042	-3.23037e-11	-1.88483e-11	6.39479e-09	-5.66309e-11	4.32241e-10	-2.09328e-11	-3.76966e-14	6.36282e-09	-5.65743e-11	1.49988e-10	-0.00328986	-5.92452e-06	-0.00889139	0.0235725		17.4833	17.4833		2.29589	0.000117058	0.0188958	0.872432
83	2022-03-31 11:55:11	1077086	-4.26236e-11	-2.5585e-11	6.47156e-09	-6.28874e-11	4.24271e-10	-2.76201e-11	-5.117e-14	6.4392e-09	-6.28245e-11	1.47222e-10	-0.00428937	-7.94664e-06	-0.00975657	0.0228634		17.7167	17.7167		2.29501	0.000115439	0.0167202	0.877849
84	2022-03-31 11:55:25	1091129	-3.07234e-11	-2.66804e-11	6.44384e-09	-5.91034e-11	4.1908e-10	-1.99088e-11	-5.33608e-14	6.41162e-09	-5.90443e-11	1.45421e-10	-0.00310511	-8.32251e-06	-0.00920895	0.0226808		17.95	17.95		2.29415	0.000113541	0.0145076	0.883163
85	2022-03-31 11:55:39	1105172	-4.44404e-11	-1.2818e-11	6.45488e-09	-7.37341e-11	4.06188e-10	-2.87974e-11	-2.5636e-14	6.42261e-09	-7.36604e-11	1.40947e-10	-0.00448375	-3.99153e-06	-0.0114689	0.0219455		18.1833	18.1833		2.29326	0.000112105	0.0120952	0.888369
86	2022-03-31 11:55:53	1119216	-4.43651e-11	-2.07013e-11	6.4258e-09	-6.86708e-11	4.0896e-10	-2.87486e-11	-4.14026e-14	6.39367e-09	-6.86021e-11	1.41909e-10	-0.00449641	-6.47556e-06	-0.0107297	0.0221952		18.4167	18.4167		2.29221	0.000110884	0.00950533	0.893519
87	2022-03-31 11:56:07	1133259	-4.36879e-11	-2.4254e-11	6.38663e-09	-6.24144e-11	4.11931e-10	-2.83098e-11	-4.8508e-14	6.3547e-09	-6.2352e-11	1.4294e-10	-0.00445493	-7.63341e-06	-0.00981195	0.0224936		18.65	18.65		2.29117	0.000109238	0.00710881	0.898732
88	2022-03-31 11:56:21	1147303	-4.36019e-11	-1.7978e-11	6.34811e-09	-5.90174e-11	4.04529e-10	-2.8254e-11	-3.5956e-14	6.31637e-09	-5.89584e-11	1.40372e-10	-0.00447314	-5.69251e-06	-0.00933422	0.0222235		18.8833	18.8833		2.29013	0.000107683	0.00487509	0.903949
89	2022-03-31 11:56:35	1161346	-4.14734e-11	-2.48478e-11	6.30449e-09	-6.52954e-11	3.97841e-10	-2.68748e-11	-4.96956e-14	6.27297e-09	-6.52301e-11	1.38051e-10	-0.00428422	-7.92218e-06	-0.0103986	0.0220073		19.1167	19.1167		2.28911	0.000106094	0.00257292	0.90911
90	2022-03-31 11:56:49	1175389	-2.86379e-11	-1.28078e-11	6.29952e-09	-5.48894e-11	4.0069e-10	-1.85574e-11	-2.56156e-14	6.26802e-09	-5.48345e-11	1.39039e-10	-0.00296064	-4.08671e-06	-0.0087483	0.0221823		19.35	19.35		2.28826	0.000104693	0.000339119	0.914265
91	2022-03-31 11:57:03	1189432	-3.84956e-11	-1.59099e-11	6.29065e-09	-5.84369e-11	3.94255e-10	-2.49451e-11	-3.18198e-14	6.2592e-09	-5.83785e-11	1.36806e-10	-0.00398536	-5.08369e-06	-0.00932683	0.0218569		19.5833	19.5833		2.28745	0.000103624	-0.00176965	0.919403
92	2022-03-31 11:57:17	1203476	-3.85816e-11	-2.95573e-11	6.27839e-09	-7.33578e-11	3.86016e-10	-2.50009e-11	-5.91146e-14	6.247e-09	-7.32844e-11	1.33948e-10	-0.00400206	-9.46288e-06	-0.0117311	0.0214419		19.8167	19.8167		2.28652	0.000101926	-0.00422641	0.924455
93	2022-03-31 11:57:31	1217519	-4.34836e-11	5.57975e-12	6.25143e-09	-6.95093e-11	3.87483e-10	-2.81774e-11	1.11595e-14	6.22017e-09	-6.94398e-11	1.34457e-10	-0.00453	1.79408e-06	-0.0111636	0.0216162		20.05	20.05		2.28552	0.000101032	-0.00689747	0.929478
94	2022-03-31 11:57:45	1231563	-4.27956e-11	-1.60226e-11	6.25103e-09	-7.46908e-11	3.83336e-10	-2.77315e-11	-3.20452e-14	6.21977e-09	-7.46161e-11	1.33018e-10	-0.00445861	-5.15215e-06	-0.0119966	0.0213862		20.2833	20.2833		2.28448	0.00010064	-0.0095995	0.934495
95	2022-03-31 11:57:59	1245606	-5.05356e-11	-3.97134e-11	6.26744e-09	-7.40243e-11	3.81225e-10	-3.27471e-11	-7.94268e-14	6.2361e-09	-7.39503e-11	1.32285e-10	-0.00525121	-1.27366e-05	-0.0118584	0.0212128		20.5167	20.5167		2.28334	9.8553e-05	-0.0123826	0.939465
96	2022-03-31 11:58:13	1259649	-5.29006e-11	-3.63451e-11	6.22695e-09	-7.32718e-11	3.66866e-10	-3.42796e-11	-7.26902e-14	6.19582e-09	-7.31985e-11	1.27303e-10	-0.0055327	-1.17321e-05	-0.0118142	0.0205465		20.75	20.75		2.28208	9.56983e-05	-0.0151444	0.944337
97	2022-03-31 11:58:27	1273692	-5.89206e-11	-4.37063e-11	6.36423e-09	-8.52258e-11	3.81555e-10	-3.81805e-11	-8.74126e-14	6.33241e-09	-8.51406e-11	1.324e-10	-0.00602939	-1.3804e-05	-0.0134452	0.0209082		20.9833	20.9833		2.28074	9.27191e-05	-0.0180913	0.949173
98	2022-03-31 11:58:41	1287736	-4.86114e-11	-3.54442e-11	5.46102e-09	-8.20976e-11	3.78983e-10	-3.15002e-11	-7.08884e-14	5.43371e-09	-8.20155e-11	1.31507e-10	-0.00579717	-1.3046e-05	-0.0150938	0.0242021		21.2167	21.2167		2.27936	8.95866e-05	-0.0214209	0.954436
99	2022-03-31 11:58:55	1301779	-5.44809e-11	-4.42591e-11	5.35149e-09	-7.56691e-11	3.83697e-10	-3.53036e-11	-8.85182e-14	5.32473e-09	-7.55934e-11	1.33143e-10	-0.00663012	-1.6624e-05	-0.0141967	0.0250046		21.45	21.45		2.27791	8.61251e-05	-0.0248381	0.960177
100	2022-03-31 11:59:09	1315823	-6.18231e-11	-2.48888e-11	5.35593e-09	-7.76148e-11	3.68041e-10	-4.00614e-11	-4.97776e-14	5.32915e-09	-7.75372e-11	1.2771e-10	-0.0075174	-9.34063e-06	-0.0145496	0.0239645		21.6833	21.6833		2.27626	8.30959e-05	-0.0281918	0.96589
101	2022-03-31 11:59:23	1329866	-6.05116e-11	-3.9949e-11	5.59683e-09	-7.16916e-11	3.62551e-10	-3.92115e-11	-7.9898e-14	5.56885e-09	-7.16199e-11	1.25805e-10	-0.00704123	-1.43473e-05	-0.0128608	0.0225909		21.9167	21.9167		2.27456	8.03323e-05	-0.0313897	0.971321
102	2022-03-31 11:59:37	1343909	-5.24921e-11	-4.53444e-11	5.6946e-09	-8.66126e-11	3.62827e-10	-3.40149e-11	-9.06888e-14	5.66613e-09	-8.6526e-11	1.25901e-10	-0.0060032	-1.60054e-05	-0.0152707	0.0222199		22.15	22.15		2.27303	7.67911e-05	-0.0346717	0.976549
103	2022-03-31 11:59:51	1357953	-6.09739e-11	-3.93756e-11	5.77252e-09	-8.13343e-11	3.57782e-10	-3.95111e-11	-7.87512e-14	5.74366e-09	-8.1253e-11	1.2415e-10	-0.00687908	-1.3711e-05	-0.0141466	0.0216152		22.3833	22.3833		2.27153	7.33242e-05	-0.0381037	0.981663
104	2022-03-31 12:00:05	1371996	-4.77621e-11	-4.06144e-11	9.41967e-09	-6.97996e-11	3.85993e-10	-3.09498e-11	-8.12288e-14	9.37257e-09	-6.97298e-11	1.3394e-10	-0.00330217	-8.66665e-06	-0.00743977	0.0142906		22.6167	22.6167		2.27034	7.07135e-05	-0.0406221	0.985852
105	2022-03-31 12:00:20	1386039	-5.31049e-11	-4.54468e-11	9.41967e-09	-8.52043e-11	3.99738e-10	-3.4412e-11	-9.08936e-14	9.37257e-09	-8.51191e-11	1.38709e-10	-0.00367156	-9.69783e-06	-0.00908172	0.0147995		22.8667	22.8667		2.26947	6.84179e-05	-0.0426873	0.989489
106	2022-03-31 12:00:34	1400083	-5.49969e-11	-4.76787e-11	9.41967e-09	-7.09283e-11	3.43139e-10	-3.5638e-11	-9.53574e-14	9.37257e-09	-7.08574e-11	1.19069e-10	-0.00380237	-1.01741e-05	-0.00756008	0.012704		23.1	23.1		2.2686	6.60995e-05	-0.0446289	0.992697
107	2022-03-31 12:00:48	1414126	-6.17694e-11	-5.29513e-11	9.41967e-09	-6.78216e-11	3.2878e-10	-4.00266e-11	-1.05903e-13	9.37257e-09	-6.77538e-11	1.14087e-10	-0.00427061	-1.12992e-05	-0.00722894	0.0121724		23.3333	23.3333		2.26766	6.35943e-05	-0.0463543	0.9956
108	2022-03-31 12:01:02	1428169	-6.90793e-11	-5.22653e-11	9.41967e-09	-6.27046e-11	3.03164e-10	-4.47634e-11	-1.04531e-13	9.37257e-09	-6.26419e-11	1.05198e-10	-0.004776	-1.11528e-05	-0.00668353	0.011224		23.5667	23.5667		2.2666	6.09749e-05	-0.0479774	0.998329
109	2022-03-31 12:01:16	1442213	-7.11111e-11	-4.89891e-11	9.41967e-09	-6.69294e-11	2.87454e-10	-4.608e-11	-9.79782e-14	9.37257e-09	-6.68625e-11	9.97465e-11	-0.00491647	-1.04537e-05	-0.00713384	0.0106424		23.8	23.8		2.26547	5.84542e-05	-0.0495894	1.00088
110	2022-03-31 12:01:30	1456256	-6.69078e-11	-5.60023e-11	9.41967e-09	-6.00386e-11	2.79876e-10	-4.33563e-11	-1.12005e-13	9.37257e-09	-5.99786e-11	9.7117e-11	-0.00462587	-1.19503e-05	-0.00639937	0.0103618		24.0333	24.0333		2.26436	5.58404e-05	-0.0511683	1.00333
111	2022-03-31 12:01:44	1470299	-6.57683e-11	-5.9043e-11	9.41967e-09	-6.71981e-11	2.59926e-10	-4.26179e-11	-1.18086e-13	9.37257e-09	-6.71309e-11	9.01943e-11	-0.00454708	-1.25991e-05	-0.00716248	0.00962322		24.2667	24.2667		2.26329	5.29763e-05	-0.0527505	1.00566
112	2022-03-31 12:01:58	1484342	-7.42931e-11	-5.44666e-11	9.41967e-09	-6.21349e-11	3.36605e-10	-4.81419e-11	-1.08933e-13	9.37257e-09	-6.20728e-11	1.16802e-10	-0.00513647	-1.16226e-05	-0.00662281	0.0124621		24.5	24.5		2.26216	5.01504e-05	-0.0543588	1.00824
113	2022-03-31 12:02:12	1498386	1.9294e-09	-4.55491e-11	9.41967e-09	1.29859e-11	1.65183e-09	1.25025e-09	-9.10982e-14	9.37257e-09	1.29729e-11	5.73185e-10	0.133395	-9.71966e-06	0.00138414	0.0611556		24.7333	24.7333		2.27712	4.76605e-05	-0.05497	1.01683
114	2022-03-31 12:02:29	1515680	9.98671e-09	-4.98082e-11	9.41967e-09	5.55881e-11	2.59839e-09	6.47139e-09	-9.96164e-14	9.37257e-09	5.55325e-11	9.01641e-10	0.69046	-1.06285e-05	0.005925	0.0962		25.0167	25.0167		2.39384	4.47778e-05	-0.0539345	1.03912
115	2022-03-31 12:02:41	1527513	1.13036e-08	-4.22832e-11	9.41967e-09	7.55508e-11	2.80321e-09	7.32473e-09	-8.45664e-14	9.37257e-09	7.54752e-11	9.72714e-10	0.781507	-9.02275e-06	0.00805278	0.103783		25.2167	25.2167		2.54103	4.28127e-05	-0.0525367	1.05912
116	2022-03-31 12:02:53	1539347	1.13036e-08	-3.98261e-11	9.41967e-09	8.85691e-11	2.67527e-09	7.32473e-09	-7.96522e-14	9.37257e-09	8.84805e-11	9.28319e-10	0.781507	-8.49844e-06	0.00944037	0.0990463		25.4167	25.4167		2.69733	4.10606e-05	-0.0507874	1.0794
117	2022-03-31 12:03:05	1551180	1.13036e-08	-3.94677e-11	9.41967e-09	9.72013e-11	2.42149e-09	7.32473e-09	-7.89354e-14	9.37257e-09	9.71041e-11	8.40257e-10	0.781507	-8.42196e-06	0.0103605	0.0896506		25.6167	25.6167		2.85363	3.93685e-05	-0.0488073	1.09827
118	2022-03-31 12:03:17	1563013	1.13036e-08	-3.99694e-11	9.41967e-09	9.18908e-11	2.11517e-09	7.32473e-09	-7.99388e-14	9.37257e-09	9.17989e-11	7.33964e-10	0.781507	-8.52901e-06	0.00979442	0.0783098		25.8167	25.8167		3.00994	3.76734e-05	-0.0467918	1.11507
119	2022-03-31 12:03:28	1574847	1.13036e-08	-4.24982e-11	9.41967e-09	8.36348e-11	1.84814e-09	7.32473e-09	-8.49964e-14	9.37257e-09	8.35512e-11	6.41305e-10	0.781507	-9.06863e-06	0.00891443	0.0684235		26	26		3.15321	3.60603e-05	-0.0450769	1.12852
120	2022-03-31 12:03:40	1586680	1.13036e-08	-3.49118e-11	9.41967e-09	7.59916e-11	1.62114e-09	7.32473e-09	-6.98236e-14	9.37257e-09	7.59156e-11	5.62536e-10	0.781507	-7.44978e-06	0.00809976	0.0600193		26.2	26.2		3.30951	3.44085e-05	-0.0433754	1.14136
121	2022-03-31 12:03:52	1598513	1.13036e-08	-3.23728e-11	9.41967e-09	6.84128e-11	1.44539e-09	7.32473e-09	-6.47456e-14	9.37257e-09	6.83444e-11	5.0155e-10	0.781507	-6.90799e-06	0.00729196	0.0535126		26.4	26.4		3.46582	3.29727e-05	-0.0418363	1.15271
122	2022-03-31 12:04:04	1610347	1.13036e-08	-4.18737e-11	9.41967e-09	6.84558e-11	1.29082e-09	7.32473e-09	-8.37474e-14	9.37257e-09	6.83873e-11	4.47915e-10	0.781507	-8.93537e-06	0.00729654	0.0477899		26.6	26.6		3.62212	3.13884e-05	-0.0403774	1.16285
123	2022-03-31 12:04:16	1622180	1.13036e-08	-5.48044e-11	9.41967e-09	6.56393e-11	1.16339e-09	7.32473e-09	-1.09609e-13	9.37257e-09	6.55737e-11	4.03696e-10	0.781507	-1.16946e-05	0.00699634	0.0430721		26.8	26.8		3.77842	2.93254e-05	-0.0389481	1.17193
124	2022-03-31 12:04:28	1634013	1.13036e-08	-4.67061e-11	9.41967e-09	5.28039e-11	9.35486e-10	7.32473e-09	-9.34122e-14	9.37257e-09	5.27511e-11	3.24614e-10	0.781507	-9.96655e-06	0.00562824	0.0346344		27	27		3.93472	2.71593e-05	-0.0376857	1.1797
125	2022-03-31 12:04:39	1645847	8.07535e-09	-5.12723e-11	9.41967e-09	2.83799e-12	7.47629e-10	5.23283e-09	-1.02545e-13	9.37257e-09	2.83515e-12	2.59427e-10	0.558313	-1.09409e-05	0.000302495	0.0276794		27.1833	27.1833		4.05754	2.52427e-05	-0.037142	1.18541
126	2022-03-31 12:04:51	1657680	5.36594e-09	-4.49349e-11	9.41967e-09	-1.82749e-11	6.62061e-10	3.47713e-09	-8.98698e-14	9.37257e-09	-1.82566e-11	2.29735e-10	0.37099	-9.5886e-06	-0.00194788	0.0245114		27.3833	27.3833		4.15047	2.31898e-05	-0.0373066	1.19063
127	2022-03-31 12:05:03	1669513	3.80382e-09	-5.48966e-11	9.41967e-09	-4.48274e-11	5.91218e-10	2.46488e-09	-1.09793e-13	9.37257e-09	-4.47826e-11	2.05153e-10	0.262988	-1.17143e-05	-0.00477805	0.0218886		27.5833	27.5833		4.21386	2.10595e-05	-0.0379792	1.19527
128	2022-03-31 12:05:15	1681347	2.72663e-09	-5.61558e-11	9.41967e-09	-4.05274e-11	5.30819e-10	1.76686e-09	-1.12312e-13	9.37257e-09	-4.04869e-11	1.84194e-10	0.188513	-1.1983e-05	-0.00431972	0.0196525		27.7833	27.7833		4.25902	1.86898e-05	-0.0388889	1.19943
129	2022-03-31 12:05:27	1693180	2.00719e-09	-5.49477e-11	9.41967e-09	-5.51044e-11	4.89216e-10	1.30066e-09	-1.09895e-13	9.37257e-09	-5.50493e-11	1.69758e-10	0.138773	-1.17252e-05	-0.00587345	0.0181122		27.9833	27.9833		4.29174	1.63189e-05	-0.0399083	1.2032
130	2022-03-31 12:05:39	1705013	1.4649e-09	-5.53266e-11	9.41967e-09	-5.89421e-11	4.56574e-10	9.49255e-10	-1.10653e-13	9.37257e-09	-5.88832e-11	1.58431e-10	0.10128	-1.18061e-05	-0.0062825	0.0169037		28.1833	28.1833		4.31575	1.39658e-05	-0.0411238	1.20671
131	2022-03-31 12:05:50	1716847	1.06678e-09	-6.1152e-11	9.41967e-09	-4.39674e-11	4.37854e-10	6.91273e-10	-1.22304e-13	9.37257e-09	-4.39234e-11	1.51935e-10	0.0737549	-1.30491e-05	-0.00468638	0.0162106		28.3667	28.3667		4.33179	1.16874e-05	-0.0421293	1.20974
132	2022-03-31 12:06:03	1729720	7.59712e-10	-6.50731e-11	9.41967e-09	-7.04231e-11	4.03193e-10	4.92293e-10	-1.30146e-13	9.37257e-09	-7.03527e-11	1.39908e-10	0.0525249	-1.38859e-05	-0.00750623	0.0149274		28.5833	28.5833		4.34547	8.76946e-06	-0.0434502	1.21311
133	2022-03-31 12:06:17	1743763	5.13311e-10	-6.22372e-11	9.41967e-09	-6.49191e-11	3.73676e-10	3.32626e-10	-1.24474e-13	9.37257e-09	-6.48542e-11	1.29666e-10	0.0354892	-1.32807e-05	-0.00691957	0.0138346		28.8167	28.8167		4.35574	5.60003e-06	-0.0451332	1.21647
134	2022-03-31 12:06:31	1757807	3.52169e-10	-6.11213e-11	9.41967e-09	-7.24226e-11	4.45932e-10	2.28206e-10	-1.22243e-13	9.37257e-09	-7.23502e-11	1.54738e-10	0.0243482	-1.30426e-05	-0.00771935	0.0165097		29.05	29.05		4.36272	2.52898e-06	-0.0468411	1.22001
135	2022-03-31 12:06:45	1771850	2.24921e-10	-6.05787e-11	9.41967e-09	-6.97458e-11	6.18669e-10	1.45749e-10	-1.21157e-13	9.37257e-09	-6.96761e-11	2.14678e-10	0.0155506	-1.29268e-05	-0.00743404	0.0229049		29.2833	29.2833		4.36738	-5.00787e-07	-0.048609	1.22461
136	2022-03-31 12:06:59	1785893	1.14777e-10	-6.61174e-11	9.41967e-09	-9.05256e-11	7.13661e-10	7.43755e-11	-1.32235e-13	9.37257e-09	-9.04351e-11	2.4764e-10	0.00793544	-1.41087e-05	-0.00964891	0.0264218		29.5167	29.5167		4.37012	-3.65493e-06	-0.050602	1.23036
137	2022-03-31 12:07:13	1799937	4.41824e-11	-5.74151e-11	9.41967e-09	-7.36588e-11	7.47821e-10	2.86302e-11	-1.1483e-13	9.37257e-09	-7.35851e-11	2.59494e-10	0.00305468	-1.22517e-05	-0.00785112	0.0276865		29.75	29.75		4.3714	-6.73031e-06	-0.0526437	1.23668
138	2022-03-31 12:07:27	1813980	1.49639e-11	-5.51013e-11	9.41967e-09	-7.85393e-11	7.52736e-10	9.69661e-12	-1.10203e-13	9.37257e-09	-7.84608e-11	2.61199e-10	0.00103457	-1.1758e-05	-0.00837132	0.0278685		29.9833	29.9833		4.37188	-9.53145e-06	-0.0545363	1.24316
139	2022-03-31 12:07:42	1828023	-1.80707e-11	-5.9258e-11	9.41967e-09	-8.43658e-11	7.40821e-10	-1.17098e-11	-1.18516e-13	9.37257e-09	-8.42814e-11	2.57065e-10	-0.00124937	-1.2645e-05	-0.00899235	0.0274274		30.2333	30.2333		4.37185	-1.25818e-05	-0.0567067	1.25007
140	2022-03-31 12:07:56	1842067	-4.15486e-11	-5.9391e-11	9.41967e-09	-9.03213e-11	7.06665e-10	-2.69235e-11	-1.18782e-13	9.37257e-09	-9.0231e-11	2.45213e-10	-0.00287258	-1.26734e-05	-0.00962713	0.0261628		30.4667	30.4667		4.37137	-1.55356e-05	-0.058879	1.25632
141	2022-03-31 12:08:10	1856110	-3.70874e-11	-5.51628e-11	9.41967e-09	-8.92248e-11	6.79299e-10	-2.40326e-11	-1.10326e-13	9.37257e-09	-8.91356e-11	2.35717e-10	-0.00256415	-1.17711e-05	-0.00951026	0.0251496		30.7	30.7		4.37074	-1.83875e-05	-0.0611117	1.26231
142	2022-03-31 12:08:24	1870153	-5.03636e-11	-6.30972e-11	9.41967e-09	-1.01952e-10	6.52992e-10	-3.26356e-11	-1.26194e-13	9.37257e-09	-1.0185e-10	2.26588e-10	-0.00348203	-1.34642e-05	-0.0108668	0.0241757		30.9333	30.9333		4.37003	-2.13316e-05	-0.063489	1.26806
143	2022-03-31 12:08:38	1884197	-6.08986e-11	-5.74663e-11	9.41967e-09	-9.42666e-11	6.36199e-10	-3.94623e-11	-1.14933e-13	9.37257e-09	-9.41723e-11	2.20761e-10	-0.0042104	-1.22627e-05	-0.0100477	0.0235539		31.1667	31.1667		4.36913	-2.43331e-05	-0.065929	1.27363
144	2022-03-31 12:08:52	1898240	-5.90174e-11	-5.23268e-11	9.20742e-09	-9.82978e-11	6.02521e-10	-3.82433e-11	-1.04654e-13	9.16138e-09	-9.81995e-11	2.09075e-10	-0.0041744	-1.14233e-05	-0.0107189	0.0228213		31.4	31.4		4.36815	-2.70964e-05	-0.0683518	1.27904
145	2022-03-31 12:09:06	1912283	-5.50614e-11	-5.23882e-11	8.19309e-09	-8.64728e-11	5.80752e-10	-3.56798e-11	-1.04776e-13	8.15212e-09	-8.63863e-11	2.01521e-10	-0.00437675	-1.28526e-05	-0.0105968	0.0247201		31.6333	31.6333		4.36716	-2.99286e-05	-0.0708386	1.28459
146	2022-03-31 12:09:20	1926327	-6.49406e-11	-6.89944e-11	7.5492e-09	-1.02963e-10	5.59237e-10	-4.20815e-11	-1.37989e-13	7.51145e-09	-1.0286e-10	1.94055e-10	-0.00560231	-1.83705e-05	-0.0136938	0.0258346		31.8667	31.8667		4.36599	-3.35713e-05	-0.0736725	1.29049
147	2022-03-31 12:09:34	1940370	-5.11376e-11	-5.55313e-11	7.15614e-09	-1.02361e-10	5.42306e-10	-3.31372e-11	-1.11063e-13	7.12036e-09	-1.02259e-10	1.8818e-10	-0.00465386	-1.55979e-05	-0.0143614	0.0264285		32.1	32.1		4.3648	-3.75343e-05	-0.0769456	1.29658
148	2022-03-31 12:09:48	1954413	-6.05869e-11	-5.97085e-11	6.91555e-09	-1.07661e-10	5.21013e-10	-3.92603e-11	-1.19417e-13	6.88097e-09	-1.07553e-10	1.80792e-10	-0.00570563	-1.73547e-05	-0.0156305	0.0262741		32.3333	32.3333		4.36359	-4.13788e-05	-0.0804447	1.30273
149	2022-03-31 12:10:02	1968457	-6.52094e-11	-5.51934e-11	6.63854e-09	-1.03726e-10	5.01924e-10	-4.22557e-11	-1.10387e-13	6.60535e-09	-1.03622e-10	1.74168e-10	-0.00639719	-1.67117e-05	-0.0156876	0.0263677		32.5667	32.5667		4.36218	-4.53532e-05	-0.0840985	1.30887
150	2022-03-31 12:10:16	1982500	-7.46586e-11	-6.48479e-11	6.55396e-09	-9.19553e-11	4.99951e-10	-4.83788e-11	-1.29696e-13	6.52119e-09	-9.18633e-11	1.73483e-10	-0.0074187	-1.98884e-05	-0.0140869	0.026603		32.8	32.8		4.36056	-4.96232e-05	-0.0875722	1.31505
151	2022-03-31 12:10:30	1996543	-8.00766e-11	-6.46534e-11	6.47958e-09	-9.93405e-11	4.78512e-10	-5.18896e-11	-1.29307e-13	6.44718e-09	-9.92412e-11	1.66044e-10	-0.00804842	-2.00563e-05	-0.015393	0.0257545		33.0333	33.0333		4.35876	-5.42834e-05	-0.0910115	1.32116
152	2022-03-31 12:10:44	2010587	-7.70451e-11	-6.99568e-11	6.41688e-09	-1.03339e-10	4.71409e-10	-4.99252e-11	-1.39914e-13	6.3848e-09	-1.03236e-10	1.63579e-10	-0.00781939	-2.19136e-05	-0.016169	0.0256201		33.2667	33.2667		4.35691	-5.91799e-05	-0.0946937	1.32716
153	2022-03-31 12:10:58	2024630	-7.88941e-11	-5.4528e-11	6.38153e-09	-1.02619e-10	4.51837e-10	-5.11234e-11	-1.09056e-13	6.34962e-09	-1.02516e-10	1.56787e-10	-0.0080514	-1.71752e-05	-0.0161453	0.0246924		33.5	33.5		4.35506	-6.37403e-05	-0.0984637	1.33302
154	2022-03-31 12:11:12	2038673	-7.48306e-11	-6.98441e-11	6.27709e-09	-1.01372e-10	4.48804e-10	-4.84902e-11	-1.39688e-13	6.2457e-09	-1.01271e-10	1.55735e-10	-0.00776377	-2.23655e-05	-0.0162144	0.0249347		33.7333	33.7333		4.35321	-6.83533e-05	-0.102239	1.33881
155	2022-03-31 12:11:26	2052717	-6.54781e-11	-5.99542e-11	6.30533e-09	-1.14121e-10	4.36879e-10	-4.24298e-11	-1.19908e-13	6.2738e-09	-1.14007e-10	1.51597e-10	-0.00676301	-1.91126e-05	-0.0181719	0.0241635		33.9667	33.9667		4.35152	-7.31924e-05	-0.106251	1.34454
156	2022-03-31 12:11:40	2066760	-6.93696e-11	-6.44794e-11	6.22767e-09	-9.80505e-11	4.34514e-10	-4.49515e-11	-1.28959e-13	6.19653e-09	-9.79524e-11	1.50776e-10	-0.0072543	-2.08114e-05	-0.0158076	0.0243324		34.2	34.2		4.34988	-7.78502e-05	-0.110215	1.3502
157	2022-03-31 12:11:54	2080803	-7.68086e-11	-6.31894e-11	6.24596e-09	-1.12047e-10	4.29815e-10	-4.9772e-11	-1.26379e-13	6.21473e-09	-1.11935e-10	1.49146e-10	-0.00800871	-2.03354e-05	-0.0180112	0.0239988		34.4333	34.4333		4.3481	-8.26507e-05	-0.114161	1.35584
158	2022-03-31 12:12:08	2094847	-8.16353e-11	-6.41517e-11	6.21031e-09	-9.62338e-11	4.17959e-10	-5.28997e-11	-1.28303e-13	6.17926e-09	-9.61376e-11	1.45032e-10	-0.00856085	-2.07636e-05	-0.0155581	0.0234707		34.6667	34.6667		4.34617	-8.74456e-05	-0.118077	1.36138
159	2022-03-31 12:12:22	2108890	-7.09821e-11	-6.0589e-11	6.19569e-09	-1.07843e-10	4.08023e-10	-4.59964e-11	-1.21178e-13	6.16471e-09	-1.07735e-10	1.41584e-10	-0.00746124	-1.96567e-05	-0.0174761	0.0229668		34.9	34.9		4.3443	-9.21613e-05	-0.121931	1.3668
160	2022-03-31 12:12:36	2122933	-8.20008e-11	-6.93936e-11	6.18702e-09	-9.60833e-11	4.04783e-10	-5.31365e-11	-1.38787e-13	6.15608e-09	-9.59872e-11	1.4046e-10	-0.00863154	-2.25447e-05	-0.0155923	0.0228164		35.1333	35.1333		4.34242	-9.70848e-05	-0.125789	1.37214
161	2022-03-31 12:12:50	2136977	-8.33983e-11	-5.1559e-11	6.12027e-09	-1.07349e-10	3.97619e-10	-5.40421e-11	-1.03118e-13	6.08967e-09	-1.07242e-10	1.37974e-10	-0.00887439	-1.69333e-05	-0.0176104	0.022657		35.3667	35.3667		4.34038	-0.000101691	-0.129663	1.37744
162	2022-03-31 12:13:05	2151020	-8.13343e-11	-6.29744e-11	6.1396e-09	-1.0034e-10	3.92827e-10	-5.27046e-11	-1.25949e-13	6.1089e-09	-1.0024e-10	1.36311e-10	-0.00862751	-2.06173e-05	-0.0164088	0.0223135		35.6167	35.6167		4.33819	-0.000106384	-0.133915	1.38306
163	2022-03-31 12:13:19	2165063	-7.98831e-11	-6.15923e-11	6.07763e-09	-1.01125e-10	3.87314e-10	-5.17642e-11	-1.23185e-13	6.04724e-09	-1.01024e-10	1.34398e-10	-0.00855998	-2.03704e-05	-0.0167058	0.0222247		35.85	35.85		4.33619	-0.000111166	-0.137778	1.38826
164	2022-03-31 12:13:33	2179107	-7.90016e-11	-6.58308e-11	6.07282e-09	-1.09187e-10	3.86446e-10	-5.1193e-11	-1.31662e-13	6.04246e-09	-1.09078e-10	1.34097e-10	-0.00847222	-2.17894e-05	-0.0180519	0.0221924		36.0833	36.0833		4.3342	-0.000116085	-0.141833	1.39344
165	2022-03-31 12:13:47	2193150	-8.10118e-11	-6.50527e-11	6.05233e-09	-1.09155e-10	3.75289e-10	-5.24956e-11	-1.30105e-13	6.02207e-09	-1.09046e-10	1.30225e-10	-0.00871721	-2.16048e-05	-0.0181077	0.0216247		36.3167	36.3167		4.33219	-0.000121148	-0.146052	1.39855
166	2022-03-31 12:14:01	2207193	-8.62148e-11	-6.1408e-11	6.04117e-09	-1.08671e-10	3.79113e-10	-5.58672e-11	-1.22816e-13	6.01096e-09	-1.08562e-10	1.31552e-10	-0.00929421	-2.0432e-05	-0.0180607	0.0218854		36.55	36.55		4.33009	-0.000126052	-0.150272	1.40363
167	2022-03-31 12:14:15	2221237	-7.87113e-11	-6.83187e-11	6.04746e-09	-1.13896e-10	3.65891e-10	-5.10049e-11	-1.36637e-13	6.01722e-09	-1.13782e-10	1.26964e-10	-0.00847649	-2.27077e-05	-0.0189094	0.0211001		36.7833	36.7833		4.32802	-0.000131085	-0.154585	1.40864
168	2022-03-31 12:14:29	2235280	-9.44171e-11	-7.09498e-11	6.05693e-09	-1.08144e-10	3.61153e-10	-6.11823e-11	-1.419e-13	6.02665e-09	-1.08036e-10	1.2532e-10	-0.010152	-2.35454e-05	-0.0179264	0.0207943		37.0167	37.0167		4.32584	-0.000136481	-0.158882	1.41353
169	2022-03-31 12:14:43	2249323	-8.83648e-11	-6.99465e-11	6.02801e-09	-1.09402e-10	3.65829e-10	-5.72604e-11	-1.39893e-13	5.99787e-09	-1.09293e-10	1.26943e-10	-0.00954679	-2.33238e-05	-0.0182219	0.0211646		37.25	37.25		4.32355	-0.000141949	-0.1631	1.41843
170	2022-03-31 12:14:57	2263367	-8.49786e-11	-6.09985e-11	5.97718e-09	-1.12401e-10	3.60477e-10	-5.50661e-11	-1.21997e-13	5.94729e-09	-1.12289e-10	1.25086e-10	-0.00925902	-2.0513e-05	-0.0188806	0.0210323		37.4833	37.4833		4.32135	-0.000147063	-0.167428	1.42335
171	2022-03-31 12:15:11	2277410	-9.12996e-11	-6.34965e-11	6.01757e-09	-1.09359e-10	3.59249e-10	-5.91621e-11	-1.26993e-13	5.98748e-09	-1.0925e-10	1.24659e-10	-0.00988097	-2.12098e-05	-0.0182463	0.02082		37.7167	37.7167		4.31912	-0.000151931	-0.17176	1.42823
172	2022-03-31 12:15:25	2291453	-8.01841e-11	-7.02946e-11	5.98694e-09	-1.06919e-10	3.48852e-10	-5.19593e-11	-1.40589e-13	5.95701e-09	-1.06812e-10	1.21052e-10	-0.00872239	-2.36007e-05	-0.0179305	0.0203209		37.95	37.95		4.31695	-0.000157159	-0.17598	1.43303
173	2022-03-31 12:15:39	2305496	-8.81606e-11	-7.57003e-11	5.96349e-09	-1.13154e-10	3.53797e-10	-5.71281e-11	-1.51401e-13	5.93367e-09	-1.13041e-10	1.22768e-10	-0.00962778	-2.55155e-05	-0.0190507	0.02069		38.1833	38.1833		4.31481	-0.000162889	-0.180295	1.43782
174	2022-03-31 12:15:53	2319540	-8.87948e-11	-7.33046e-11	5.94735e-09	-1.1568e-10	3.49244e-10	-5.7539e-11	-1.46609e-13	5.91761e-09	-1.15564e-10	1.21188e-10	-0.00972335	-2.47751e-05	-0.0195289	0.0204791		38.4167	38.4167		4.31255	-0.000168756	-0.184796	1.44262
175	2022-03-31 12:16:07	2333583	-9.23961e-11	-6.28413e-11	5.93869e-09	-1.18067e-10	3.52315e-10	-5.98727e-11	-1.25683e-13	5.909e-09	-1.17949e-10	1.22253e-10	-0.0101325	-2.12697e-05	-0.0199609	0.0206894		38.65	38.65		4.31023	-0.000174128	-0.189403	1.44742
176	2022-03-31 12:16:21	2347626	-9.22026e-11	-8.07784e-11	5.9358e-09	-1.09477e-10	3.40629e-10	-5.97473e-11	-1.61557e-13	5.90612e-09	-1.09368e-10	1.18198e-10	-0.0101162	-2.73541e-05	-0.0185177	0.0200128		38.8833	38.8833		4.30787	-0.000179801	-0.193892	1.45217
177	2022-03-31 12:16:35	2361670	-8.45593e-11	-6.63836e-11	5.92924e-09	-1.07908e-10	3.33326e-10	-5.47944e-11	-1.32767e-13	5.89959e-09	-1.078e-10	1.15664e-10	-0.00928783	-2.25045e-05	-0.0182725	0.0196054		39.1167	39.1167		4.30561	-0.000185618	-0.198184	1.45679
178	2022-03-31 12:16:49	2375713	-8.95796e-11	-7.05915e-11	5.93243e-09	-1.04124e-10	3.43961e-10	-5.80476e-11	-1.41183e-13	5.90277e-09	-1.0402e-10	1.19354e-10	-0.00983396	-2.39181e-05	-0.0176222	0.0202201		39.35	39.35		4.30338	-0.000191034	-0.202372	1.46144
179	2022-03-31 12:17:03	2389757	-8.69458e-11	-7.06939e-11	5.92687e-09	-1.13089e-10	3.4006e-10	-5.63409e-11	-1.41388e-13	5.89724e-09	-1.12976e-10	1.18001e-10	-0.00955378	-2.39753e-05	-0.0191574	0.0200095		39.5833	39.5833		4.30112	-0.000196621	-0.206663	1.46613
180	2022-03-31 12:17:17	2403800	-9.27186e-11	-7.77274e-11	5.93566e-09	-1.16615e-10	3.33487e-10	-6.00817e-11	-1.55455e-13	5.90598e-09	-1.16498e-10	1.1572e-10	-0.010173	-2.63216e-05	-0.0197255	0.0195937		39.8167	39.8167		4.29881	-0.000202489	-0.211199	1.47075
181	2022-03-31 12:17:31	2417843	-9.25573e-11	-6.13977e-11	5.93727e-09	-1.14068e-10	3.4059e-10	-5.99771e-11	-1.22795e-13	5.90758e-09	-1.13954e-10	1.18185e-10	-0.0101526	-2.07861e-05	-0.0192894	0.0200056		40.05	40.05		4.29644	-0.000207985	-0.215751	1.47537
182	2022-03-31 12:17:45	2431887	-9.42343e-11	-6.92401e-11	5.91719e-09	-1.07747e-10	3.31406e-10	-6.10638e-11	-1.3848e-13	5.8876e-09	-1.07639e-10	1.14998e-10	-0.0103716	-2.35206e-05	-0.0182824	0.0195322		40.2833	40.2833		4.29405	-0.000213154	-0.220134	1.47999
183	2022-03-31 12:17:59	2445930	-8.60106e-11	-5.91966e-11	5.92904e-09	-1.04995e-10	3.29556e-10	-5.57349e-11	-1.18393e-13	5.89939e-09	-1.0489e-10	1.14356e-10	-0.00944756	-2.00687e-05	-0.0177798	0.0193843		40.5167	40.5167		4.29174	-0.00021824	-0.224342	1.48453
184	2022-03-31 12:18:13	2459973	-9.53416e-11	-7.0786e-11	5.9431e-09	-1.15401e-10	3.22891e-10	-6.17814e-11	-1.41572e-13	5.91338e-09	-1.15286e-10	1.12043e-10	-0.0104477	-2.39409e-05	-0.0194957	0.0189474		40.75	40.75		4.28941	-0.000223374	-0.228691	1.489
185	2022-03-31 12:18:28	2474017	-9.06868e-11	-5.8572e-11	5.88723e-09	-1.14906e-10	3.31583e-10	-5.8765e-11	-1.17144e-13	5.85779e-09	-1.14791e-10	1.15059e-10	-0.0100319	-1.9998e-05	-0.0195963	0.0196421		41	41		4.28685	-0.000228867	-0.233577	1.49382
186	2022-03-31 12:18:42	2488060	-8.89668e-11	-6.25034e-11	5.9031e-09	-1.07327e-10	3.20403e-10	-5.76505e-11	-1.25007e-13	5.87358e-09	-1.0722e-10	1.1118e-10	-0.00981521	-2.12829e-05	-0.0182546	0.0189288		41.2333	41.2333		4.28454	-0.000233683	-0.237993	1.49832
187	2022-03-31 12:18:56	2502103	-9.09448e-11	-6.42849e-11	5.88671e-09	-1.19916e-10	3.26884e-10	-5.89322e-11	-1.2857e-13	5.85728e-09	-1.19796e-10	1.13429e-10	-0.0100614	-2.19504e-05	-0.0204525	0.0193654		41.4667	41.4667		4.28222	-0.000238727	-0.242509	1.50279
188	2022-03-31 12:19:10	2516146	-9.01816e-11	-7.50041e-11	5.90047e-09	-1.02769e-10	3.22361e-10	-5.84377e-11	-1.50008e-13	5.87097e-09	-1.02666e-10	1.11859e-10	-0.00995367	-2.55508e-05	-0.0174871	0.019053		41.7	41.7		4.27989	-0.000244268	-0.246935	1.50727
189	2022-03-31 12:19:24	2530190	-9.43633e-11	-7.83827e-11	6.09544e-09	-1.10875e-10	3.18767e-10	-6.11474e-11	-1.56765e-13	6.06496e-09	-1.10764e-10	1.10612e-10	-0.0100821	-2.58477e-05	-0.018263	0.0182379		41.9333	41.9333		4.27755	-0.000250265	-0.251106	1.51162
190	2022-03-31 12:19:38	2544233	-8.51076e-11	-7.52601e-11	5.26309e-09	-1.08757e-10	3.29349e-10	-5.51497e-11	-1.5052e-13	5.23677e-09	-1.08648e-10	1.14284e-10	-0.0105312	-2.87429e-05	-0.0207472	0.0218234		42.1667	42.1667		4.27514	-0.000256634	-0.255657	1.5163
191	2022-03-31 12:19:52	2558276	-9.06331e-11	-6.37525e-11	5.08827e-09	-1.19131e-10	3.26361e-10	-5.87302e-11	-1.27505e-13	5.06283e-09	-1.19012e-10	1.13247e-10	-0.0116003	-2.51845e-05	-0.023507	0.0223684		42.4	42.4		4.27256	-0.000262925	-0.26082	1.52145
192	2022-03-31 12:20:06	2572320	-9.23208e-11	-7.67753e-11	5.09569e-09	-1.12455e-10	3.19604e-10	-5.98239e-11	-1.53551e-13	5.07021e-09	-1.12343e-10	1.10903e-10	-0.0117991	-3.02849e-05	-0.0221574	0.0218734		42.6333	42.6333		4.26983	-0.000269397	-0.266148	1.52661
193	2022-03-31 12:20:20	2586363	-1.01189e-10	-8.3512e-11	5.29709e-09	-1.34224e-10	3.11381e-10	-6.55705e-11	-1.67024e-13	5.2706e-09	-1.3409e-10	1.08049e-10	-0.0124408	-3.16897e-05	-0.0254411	0.0205003		42.8667	42.8667		4.267	-0.000276627	-0.271701	1.53156
194	2022-03-31 12:20:34	2600406	-9.13856e-11	-7.21989e-11	5.44118e-09	-1.22184e-10	3.13754e-10	-5.92179e-11	-1.44398e-13	5.41397e-09	-1.22062e-10	1.08873e-10	-0.010938	-2.66713e-05	-0.0225457	0.0201096		43.1	43.1		4.26428	-0.000283436	-0.277299	1.5363
195	2022-03-31 12:20:48	2614449	-9.68143e-11	-7.56389e-11	5.51009e-09	-1.22377e-10	3.09476e-10	-6.27357e-11	-1.51278e-13	5.48254e-09	-1.22255e-10	1.07388e-10	-0.0114428	-2.75927e-05	-0.0222989	0.0195873		43.3333	43.3333		4.26166	-0.000289767	-0.282531	1.54093
196	2022-03-31 12:21:02	2628493	-9.45783e-11	-7.80858e-11	7.39968e-09	-1.22044e-10	3.29525e-10	-6.12867e-11	-1.56172e-13	7.36268e-09	-1.21922e-10	1.14345e-10	-0.00832397	-2.12112e-05	-0.0165594	0.0155304		43.5667	43.5667		4.25936	-0.00029546	-0.287065	1.54502
197	2022-03-31 12:21:16	2642536	-9.36323e-11	-8.48941e-11	9.41967e-09	-1.12584e-10	3.41796e-10	-6.06737e-11	-1.69788e-13	9.37257e-09	-1.12471e-10	1.18603e-10	-0.00647354	-1.81154e-05	-0.0120001	0.0126543		43.8	43.8		4.25763	-0.000300049	-0.290396	1.54831
198	2022-03-31 12:21:30	2656579	-9.31486e-11	-8.0461e-11	9.41967e-09	-1.11423e-10	3.06282e-10	-6.03603e-11	-1.60922e-13	9.37257e-09	-1.11312e-10	1.0628e-10	-0.0064401	-1.71695e-05	-0.0118763	0.0113395		44.0333	44.0333		4.25613	-0.000304165	-0.293182	1.55111
199	2022-03-31 12:21:44	2670623	-1.01393e-10	-9.21325e-11	9.41967e-09	-1.10574e-10	2.86271e-10	-6.57027e-11	-1.84265e-13	9.37257e-09	-1.10463e-10	9.9336e-11	-0.0070101	-1.966e-05	-0.0117858	0.0105986		44.2667	44.2667		4.25456	-0.000308462	-0.295943	1.55367
200	2022-03-31 12:21:58	2684666	-1.0048e-10	-8.83955e-11	9.41967e-09	-1.07661e-10	2.66791e-10	-6.5111e-11	-1.76791e-13	9.37257e-09	-1.07553e-10	9.25765e-11	-0.00694698	-1.88626e-05	-0.0114753	0.00987738		44.5	44.5		4.25293	-0.000312956	-0.298656	1.55606
201	2022-03-31 12:22:12	2698709	-1.09252e-10	-9.28798e-11	9.41967e-09	-1.00082e-10	2.534e-10	-7.07953e-11	-1.8576e-13	9.37257e-09	-9.99819e-11	8.79298e-11	-0.00755345	-1.98195e-05	-0.0106675	0.00938161		44.7333	44.7333		4.25124	-0.000317469	-0.30124	1.55831
202	2022-03-31 12:22:26	2712753	-9.96415e-11	-9.46305e-11	9.41967e-09	-9.35141e-11	2.29159e-10	-6.45677e-11	-1.89261e-13	9.37257e-09	-9.34206e-11	7.95182e-11	-0.006889	-2.01931e-05	-0.00996744	0.00848414		44.9667	44.9667		4.24955	-0.000322137	-0.303647	1.56039
203	2022-03-31 12:22:40	2726796	-1.02662e-10	-9.07298e-11	9.41967e-09	-1.09402e-10	2.28629e-10	-6.6525e-11	-1.8146e-13	9.37257e-09	-1.09293e-10	7.93343e-11	-0.00709784	-1.93607e-05	-0.0116609	0.00846451		45.2	45.2		4.24792	-0.000326752	-0.30617	1.56237
204	2022-03-31 12:22:54	2740839	-1.0866e-10	-9.33098e-11	9.41967e-09	-1.02017e-10	2.24275e-10	-7.04117e-11	-1.8662e-13	9.37257e-09	-1.01915e-10	7.78234e-11	-0.00751253	-1.99112e-05	-0.0108737	0.00830332		45.4333	45.4333		4.24621	-0.000331334	-0.3088	1.56432
205	2022-03-31 12:23:08	2754883	2.95226e-10	-9.40879e-11	9.41967e-09	-6.28229e-11	1.03695e-09	1.91306e-10	-1.88176e-13	9.37257e-09	-6.27601e-11	3.59822e-10	0.0204113	-2.00773e-05	-0.00669614	0.0383909		45.6667	45.6667		4.24772	-0.000335999	-0.310849	1.56977
206	2022-03-31 12:23:26	2772177	7.08176e-09	-7.8567e-11	9.41967e-09	2.66599e-12	2.12906e-09	4.58898e-09	-1.57134e-13	9.37257e-09	2.66332e-12	7.38784e-10	0.489618	-1.67653e-05	0.000284161	0.078824		45.9667	45.9667		4.32422	-0.000341525	-0.311811	1.58735
207	2022-03-31 12:23:38	2784010	8.99457e-09	-7.8956e-11	9.41967e-09	1.35234e-11	2.46701e-09	5.82848e-09	-1.57912e-13	9.37257e-09	1.35099e-11	8.56052e-10	0.621866	-1.68483e-05	0.00144143	0.0913359		46.1667	46.1667		4.43537	-0.000344887	-0.311639	1.60437
208	2022-03-31 12:23:49	2795843	1.06117e-08	-8.03177e-11	9.41967e-09	3.70336e-11	2.39939e-09	6.87638e-09	-1.60635e-13	9.37257e-09	3.69966e-11	8.32588e-10	0.733671	-1.71389e-05	0.00394732	0.0888324		46.35	46.35		4.55963	-0.000348002	-0.311145	1.62089
209	2022-03-31 12:24:01	2807677	1.13036e-08	-9.42722e-11	9.41967e-09	4.45479e-11	2.18574e-09	7.32473e-09	-1.88544e-13	9.37257e-09	4.45034e-11	7.58452e-10	0.781507	-2.01166e-05	0.00474825	0.0809225		46.55	46.55		4.71115	-0.000351728	-0.310275	1.63786
210	2022-03-31 12:24:13	2819510	1.13036e-08	-8.42593e-11	9.41967e-09	4.83319e-11	1.91658e-09	7.32473e-09	-1.68519e-13	9.37257e-09	4.82836e-11	6.65053e-10	0.781507	-1.798e-05	0.00515158	0.0709574		46.75	46.75		4.86745	-0.000355537	-0.309285	1.65305
211	2022-03-31 12:24:25	2831343	1.13036e-08	-7.58436e-11	9.41967e-09	3.92804e-11	1.63699e-09	7.32473e-09	-1.51687e-13	9.37257e-09	3.92411e-11	5.68036e-10	0.781507	-1.61842e-05	0.0041868	0.0606062		46.95	46.95		5.02375	-0.000358954	-0.308351	1.66621
212	2022-03-31 12:24:37	2843177	1.13036e-08	-8.12084e-11	9.41967e-09	3.22714e-11	1.41899e-09	7.32473e-09	-1.62417e-13	9.37257e-09	3.22391e-11	4.9239e-10	0.781507	-1.73289e-05	0.00343973	0.0525352		47.15	47.15		5.18005	-0.000362305	-0.307589	1.67752
213	2022-03-31 12:24:49	2855010	1.13036e-08	-7.67549e-11	9.41967e-09	2.07474e-11	1.24359e-09	7.32473e-09	-1.5351e-13	9.37257e-09	2.07267e-11	4.31526e-10	0.781507	-1.63786e-05	0.00221142	0.0460413		47.35	47.35		5.33635	-0.000365676	-0.307023	1.68738
214	2022-03-31 12:25:00	2866843	1.13036e-08	-8.43208e-11	9.41967e-09	1.69312e-11	1.10426e-09	7.32473e-09	-1.68642e-13	9.37257e-09	1.69143e-11	3.83178e-10	0.781507	-1.79931e-05	0.00180466	0.0408829		47.5333	47.5333		5.47963	-0.000368827	-0.306655	1.69535
215	2022-03-31 12:25:12	2878677	1.13036e-08	-8.63274e-11	9.41967e-09	1.80062e-11	9.82714e-10	7.32473e-09	-1.72655e-13	9.37257e-09	1.79882e-11	3.41002e-10	0.781507	-1.84213e-05	0.00191924	0.0363829		47.7333	47.7333		5.63593	-0.000372468	-0.306283	1.70307
216	2022-03-31 12:25:24	2890510	1.13036e-08	-8.3041e-11	9.41967e-09	1.97477e-11	8.76336e-10	7.32473e-09	-1.66082e-13	9.37257e-09	1.9728e-11	3.04089e-10	0.781507	-1.772e-05	0.00210486	0.0324445		47.9333	47.9333		5.79223	-0.000376082	-0.305881	1.70996
217	2022-03-31 12:25:36	2902343	9.26235e-09	-8.53036e-11	9.41967e-09	-3.88289e-11	6.51111e-10	6.002e-09	-1.70607e-13	9.37257e-09	-3.87901e-11	2.25936e-10	0.64038	-1.82028e-05	-0.00413868	0.024106		48.1333	48.1333		5.93442	-0.000379674	-0.306084	1.71561
218	2022-03-31 12:25:48	2914176	5.71445e-09	-8.76993e-11	9.41967e-09	-6.45429e-11	5.67e-10	3.70296e-09	-1.75399e-13	9.37257e-09	-6.44784e-11	1.96749e-10	0.395085	-1.8714e-05	-0.00687947	0.020992		48.3333	48.3333		6.03797	-0.000383366	-0.307186	1.72012
219	2022-03-31 12:26:00	2926010	4.00319e-09	-8.44744e-11	9.41967e-09	-6.66606e-11	5.09917e-10	2.59407e-09	-1.68949e-13	9.37257e-09	-6.65939e-11	1.76941e-10	0.276772	-1.80259e-05	-0.00710519	0.0188786		48.5333	48.5333		6.10515	-0.00038704	-0.308584	1.72411
220	2022-03-31 12:26:11	2937843	2.84432e-09	-9.58686e-11	9.41967e-09	-8.10548e-11	4.59769e-10	1.84312e-09	-1.91737e-13	9.37257e-09	-8.09737e-11	1.5954e-10	0.19665	-2.04573e-05	-0.00863944	0.017022		48.7167	48.7167		6.14855	-0.000390568	-0.310027	1.7274
221	2022-03-31 12:26:23	2949676	2.05766e-09	-8.74844e-11	9.41967e-09	-6.65853e-11	4.16654e-10	1.33336e-09	-1.74969e-13	9.37257e-09	-6.65187e-11	1.44579e-10	0.142262	-1.86682e-05	-0.00709717	0.0154257		48.9167	48.9167		6.18244	-0.00039448	-0.311601	1.73064
222	2022-03-31 12:26:35	2961510	1.50822e-09	-8.11265e-11	9.41967e-09	-8.22158e-11	3.92528e-10	9.77327e-10	-1.62253e-13	9.37257e-09	-8.21336e-11	1.36207e-10	0.104275	-1.73115e-05	-0.00876319	0.0145325		49.1167	49.1167		6.2071	-0.000398078	-0.313187	1.73364
223	2022-03-31 12:26:47	2973343	1.08971e-09	-9.14055e-11	9.41967e-09	-9.49868e-11	3.73331e-10	7.06132e-10	-1.82811e-13	9.37257e-09	-9.48918e-11	1.29546e-10	0.0753403	-1.95049e-05	-0.0101244	0.0138218		49.3167	49.3167		6.22506	-0.00040176	-0.315076	1.73647
224	2022-03-31 12:27:00	2986217	7.46844e-10	-8.93068e-11	9.41967e-09	-9.48901e-11	3.44959e-10	4.83955e-10	-1.78614e-13	9.37257e-09	-9.47952e-11	1.19701e-10	0.0516352	-1.90571e-05	-0.0101141	0.0127714		49.5333	49.5333		6.23881	-0.000405937	-0.317268	1.73935
225	2022-03-31 12:27:14	3000260	5.04109e-10	-9.79886e-11	9.41967e-09	-1.02479e-10	3.14744e-10	3.26663e-10	-1.95977e-13	9.37257e-09	-1.02377e-10	1.09216e-10	0.034853	-2.09097e-05	-0.010923	0.0116527		49.7667	49.7667		6.2489	-0.0004106	-0.319723	1.7422
226	2022-03-31 12:27:28	3014303	3.33969e-10	-9.56438e-11	9.41967e-09	-1.18206e-10	3.39684e-10	2.16412e-10	-1.91288e-13	9.37257e-09	-1.18088e-10	1.1787e-10	0.0230899	-2.04093e-05	-0.0125993	0.0125761		50	50		6.25566	-0.000415421	-0.322467	1.74503
227	2022-03-31 12:27:42	3028347	1.94413e-10	-1.05626e-10	9.41967e-09	-1.15465e-10	5.17135e-10	1.2598e-10	-2.11252e-13	9.37257e-09	-1.1535e-10	1.79446e-10	0.0134413	-2.25394e-05	-0.0123071	0.0191458		50.2333	50.2333		6.25993	-0.000420431	-0.325373	1.74873
228	2022-03-31 12:27:56	3042390	7.77868e-11	-1.06496e-10	9.41967e-09	-1.29365e-10	6.35385e-10	5.04058e-11	-2.12992e-13	9.37257e-09	-1.29236e-10	2.20479e-10	0.00537802	-2.2725e-05	-0.0137887	0.0235238		50.4667	50.4667		6.26212	-0.000425712	-0.328417	1.75371
229	2022-03-31 12:28:10	3056433	1.98659e-11	-8.96958e-11	9.41967e-09	-1.18303e-10	6.82677e-10	1.28731e-11	-1.79392e-13	9.37257e-09	-1.18185e-10	2.36889e-10	0.00137349	-1.91401e-05	-0.0126096	0.0252747		50.7	50.7		6.26291	-0.000430597	-0.331497	1.7594
230	2022-03-31 12:28:24	3070477	-3.12179e-11	-8.76277e-11	9.41967e-09	-1.34632e-10	6.89872e-10	-2.02292e-11	-1.75255e-13	9.37257e-09	-1.34497e-10	2.39386e-10	-0.00215834	-1.86988e-05	-0.0143501	0.0255411		50.9333	50.9333		6.26282	-0.000435011	-0.334642	1.76533
231	2022-03-31 12:28:38	3084520	-4.75686e-11	-9.95038e-11	9.41967e-09	-1.31117e-10	6.82309e-10	-3.08245e-11	-1.99008e-13	9.37257e-09	-1.30986e-10	2.36761e-10	-0.00328879	-2.1233e-05	-0.0139754	0.0252611		51.1667	51.1667		6.26218	-0.00043967	-0.337947	1.77126
232	2022-03-31 12:28:52	3098563	-6.99393e-11	-9.78038e-11	9.41967e-09	-1.28193e-10	6.51848e-10	-4.53207e-11	-1.95608e-13	9.37257e-09	-1.28065e-10	2.26191e-10	-0.00483546	-2.08702e-05	-0.0136638	0.0241333		51.4	51.4		6.26123	-0.000444582	-0.341172	1.77702
233	2022-03-31 12:29:06	3112607	-7.28311e-11	-1.01356e-10	9.41967e-09	-1.26914e-10	6.35285e-10	-4.71946e-11	-2.02712e-13	9.37257e-09	-1.26787e-10	2.20444e-10	-0.00503539	-2.16282e-05	-0.0135275	0.0235201		51.6333	51.6333		6.26008	-0.00044954	-0.344344	1.78258
234	2022-03-31 12:29:20	3126650	-8.53333e-11	-8.5232e-11	9.41967e-09	-1.31934e-10	6.00417e-10	-5.5296e-11	-1.70464e-13	9.37257e-09	-1.31802e-10	2.08345e-10	-0.00589977	-1.81875e-05	-0.0140625	0.0222292		51.8667	51.8667		6.25881	-0.000454185	-0.347563	1.78792
235	2022-03-31 12:29:34	3140693	-8.14096e-11	-8.80168e-11	9.41967e-09	-1.13992e-10	5.92393e-10	-5.27534e-11	-1.76034e-13	9.37257e-09	-1.13878e-10	2.0556e-10	-0.00562849	-1.87818e-05	-0.0121501	0.0219321		52.1	52.1		6.25746	-0.000458498	-0.350621	1.79307
236	2022-03-31 12:29:48	3154736	-9.24928e-11	-9.51219e-11	9.12017e-09	-1.29225e-10	5.65188e-10	-5.99353e-11	-1.90244e-13	9.07457e-09	-1.29096e-10	1.9612e-10	-0.00660476	-2.09645e-05	-0.0142261	0.0216121		52.3333	52.3333		6.25603	-0.000463135	-0.353698	1.79815
237	2022-03-31 12:30:02	3168780	-9.42021e-11	-9.09141e-11	8.06734e-09	-1.26473e-10	5.31863e-10	-6.1043e-11	-1.81828e-13	8.027e-09	-1.26347e-10	1.84556e-10	-0.0076047	-2.26521e-05	-0.0157402	0.022992		52.5667	52.5667		6.25438	-0.000468224	-0.357194	1.80335
238	2022-03-31 12:30:16	3182823	-9.65563e-11	-8.93579e-11	7.37338e-09	-1.28129e-10	5.13526e-10	-6.25685e-11	-1.78716e-13	7.33651e-09	-1.28001e-10	1.78194e-10	-0.00852837	-2.43598e-05	-0.0174471	0.0242886		52.8	52.8		6.25249	-0.000473709	-0.361066	1.80887
239	2022-03-31 12:30:30	3196866	-8.47851e-11	-8.5017e-11	6.97895e-09	-1.2758e-10	5.06416e-10	-5.49407e-11	-1.70034e-13	6.94406e-09	-1.27452e-10	1.75726e-10	-0.00791191	-2.44863e-05	-0.0183542	0.025306		53.0333	53.0333		6.25058	-0.000479407	-0.365243	1.81466
240	2022-03-31 12:30:44	3210910	-8.75908e-11	-8.7167e-11	6.7114e-09	-1.20722e-10	4.79656e-10	-5.67588e-11	-1.74334e-13	6.67784e-09	-1.20601e-10	1.66441e-10	-0.00849958	-2.61063e-05	-0.0180599	0.0249243		53.2667	53.2667		6.24866	-0.00048531	-0.369491	1.82052
241	2022-03-31 12:30:58	3224953	-9.48148e-11	-9.11598e-11	6.52579e-09	-1.32192e-10	4.69644e-10	-6.144e-11	-1.8232e-13	6.49316e-09	-1.3206e-10	1.62966e-10	-0.00946226	-2.80787e-05	-0.0203383	0.0250982		53.5	53.5		6.24657	-0.000491631	-0.373971	1.82635
242	2022-03-31 12:31:12	3238996	-9.84698e-11	-8.68906e-11	6.39747e-09	-1.27086e-10	4.55499e-10	-6.38084e-11	-1.73781e-13	6.36548e-09	-1.26959e-10	1.58058e-10	-0.0100241	-2.73006e-05	-0.0199449	0.0248305		53.7333	53.7333		6.24429	-0.000498092	-0.378671	1.83218
243	2022-03-31 12:31:27	3253039	-9.46428e-11	-8.9276e-11	6.3027e-09	-1.19969e-10	4.43621e-10	-6.13285e-11	-1.78552e-13	6.27119e-09	-1.19849e-10	1.53936e-10	-0.00977941	-2.84718e-05	-0.0191111	0.0245466		53.9833	53.9833		6.24182	-0.000505064	-0.383553	1.83835
244	2022-03-31 12:31:41	3267083	-8.91711e-11	-8.36144e-11	6.30337e-09	-1.31321e-10	4.2854e-10	-5.77829e-11	-1.67229e-13	6.27185e-09	-1.3119e-10	1.48703e-10	-0.00921305	-2.66634e-05	-0.0209172	0.0237096		54.2167	54.2167		6.2396	-0.000511496	-0.388223	1.84398
245	2022-03-31 12:31:55	3281126	-8.89346e-11	-7.82906e-11	6.2272e-09	-1.2356e-10	4.30022e-10	-5.76296e-11	-1.56581e-13	6.19606e-09	-1.23436e-10	1.49218e-10	-0.009301	-2.52711e-05	-0.0199218	0.0240826		54.45	54.45		6.23744	-0.000517555	-0.392987	1.84956
246	2022-03-31 12:32:09	3295169	-1.03758e-10	-8.77096e-11	6.17502e-09	-1.28709e-10	4.05934e-10	-6.72352e-11	-1.75419e-13	6.14414e-09	-1.2858e-10	1.40859e-10	-0.010943	-2.85506e-05	-0.0209273	0.0229257		54.6833	54.6833		6.23508	-0.000523835	-0.397753	1.85504
247	2022-03-31 12:32:23	3309213	-1.04188e-10	-8.04201e-11	6.11905e-09	-1.34675e-10	3.98386e-10	-6.75138e-11	-1.6084e-13	6.08845e-09	-1.3454e-10	1.3824e-10	-0.0110888	-2.64172e-05	-0.0220976	0.0227053		54.9167	54.9167		6.23251	-0.000530247	-0.402772	1.86036
248	2022-03-31 12:32:37	3323256	-9.95018e-11	-1.02912e-10	6.10495e-09	-1.45114e-10	3.91191e-10	-6.44772e-11	-2.05824e-13	6.07443e-09	-1.44969e-10	1.35743e-10	-0.0106145	-3.38837e-05	-0.0238654	0.0223467		55.15	55.15		6.22998	-0.000537283	-0.408135	1.86562
249	2022-03-31 12:32:51	3337299	-1.02382e-10	-8.8631e-11	6.08006e-09	-1.29763e-10	3.89825e-10	-6.63435e-11	-1.77262e-13	6.04966e-09	-1.29633e-10	1.35269e-10	-0.0109665	-2.93012e-05	-0.0214282	0.0223598		55.3833	55.3833		6.22746	-0.000544654	-0.413419	1.87084
250	2022-03-31 12:33:05	3351343	-1.05016e-10	-9.43848e-11	6.04985e-09	-1.21657e-10	3.73224e-10	-6.80504e-11	-1.8877e-13	6.0196e-09	-1.21535e-10	1.29509e-10	-0.0113048	-3.13592e-05	-0.0201899	0.0215145		55.6167	55.6167		6.22486	-0.000551731	-0.418275	1.87595
251	2022-03-31 12:33:19	3365386	-1.14175e-10	-9.28287e-11	6.03273e-09	-1.37406e-10	3.74614e-10	-7.39854e-11	-1.85657e-13	6.00257e-09	-1.37269e-10	1.29991e-10	-0.0123256	-3.09297e-05	-0.0228683	0.0216559		55.85	55.85		6.2221	-0.000558998	-0.423298	1.88099
252	2022-03-31 12:33:33	3379429	-1.1396e-10	-7.74715e-11	6.00832e-09	-1.3732e-10	3.63971e-10	-7.38461e-11	-1.54943e-13	5.97828e-09	-1.37183e-10	1.26298e-10	-0.0123524	-2.59177e-05	-0.0229469	0.0211261		56.0833	56.0833		6.21922	-0.00056563	-0.428643	1.88598
253	2022-03-31 12:33:47	3393473	-1.17368e-10	-8.93989e-11	6.01834e-09	-1.33256e-10	3.62182e-10	-7.60545e-11	-1.78798e-13	5.98825e-09	-1.33123e-10	1.25677e-10	-0.0127006	-2.98581e-05	-0.0222307	0.0209873		56.3167	56.3167		6.2163	-0.000572138	-0.433914	1.89089
254	2022-03-31 12:34:01	3407516	-1.11531e-10	-9.93086e-11	6.00287e-09	-1.30053e-10	3.54811e-10	-7.22721e-11	-1.98617e-13	5.97286e-09	-1.29923e-10	1.23119e-10	-0.0121001	-3.32533e-05	-0.0217522	0.0206132		56.55	56.55		6.21341	-0.000579501	-0.439045	1.89575
255	2022-03-31 12:34:15	3421559	-1.08789e-10	-8.93374e-11	5.97393e-09	-1.33074e-10	3.50572e-10	-7.04953e-11	-1.78675e-13	5.94406e-09	-1.32941e-10	1.21648e-10	-0.0118598	-3.00594e-05	-0.0223653	0.0204656		56.7833	56.7833		6.21061	-0.000586887	-0.444192	1.90054
256	2022-03-31 12:34:29	3435603	-1.15003e-10	-1.02257e-10	5.94817e-09	-1.37857e-10	3.56439e-10	-7.45219e-11	-2.04514e-13	5.91843e-09	-1.37719e-10	1.23684e-10	-0.0125915	-3.45555e-05	-0.0232695	0.0208982		57.0167	57.0167		6.20776	-0.000594425	-0.449516	1.90537
257	2022-03-31 12:34:43	3449646	-1.088e-10	-9.51731e-11	5.93814e-09	-1.34278e-10	3.41964e-10	-7.05024e-11	-1.90346e-13	5.90845e-09	-1.34144e-10	1.18662e-10	-0.0119325	-3.22159e-05	-0.0227037	0.0200834		57.25	57.25		6.2049	-0.000602215	-0.45488	1.91015
258	2022-03-31 12:34:57	3463689	-1.12025e-10	-8.97982e-11	5.97822e-09	-1.41534e-10	3.38071e-10	-7.25922e-11	-1.79596e-13	5.94833e-09	-1.41392e-10	1.17311e-10	-0.0122038	-3.01927e-05	-0.0237701	0.0197216		57.4833	57.4833		6.20208	-0.000609496	-0.460302	1.91479
259	2022-03-31 12:35:11	3477733	-1.19679e-10	-9.1723e-11	5.94812e-09	-1.39696e-10	3.34363e-10	-7.7552e-11	-1.83446e-13	5.91838e-09	-1.39556e-10	1.16024e-10	-0.0131036	-3.0996e-05	-0.0235802	0.019604		57.7167	57.7167		6.19913	-0.000616635	-0.465826	1.91938
260	2022-03-31 12:35:25	3491776	-1.18669e-10	-8.89791e-11	5.91778e-09	-1.34095e-10	3.33188e-10	-7.68975e-11	-1.77958e-13	5.88819e-09	-1.33961e-10	1.15616e-10	-0.0130596	-3.02229e-05	-0.0227508	0.0196353		57.95	57.95		6.19608	-0.000623777	-0.471231	1.92396
261	2022-03-31 12:35:39	3505819	-1.15562e-10	-1.02759e-10	5.90157e-09	-1.31418e-10	3.23927e-10	-7.48842e-11	-2.05518e-13	5.87206e-09	-1.31287e-10	1.12403e-10	-0.0127526	-3.49993e-05	-0.0223578	0.0191419		58.1833	58.1833		6.19307	-0.000631387	-0.476494	1.92848
262	2022-03-31 12:35:53	3519863	-1.11423e-10	-9.19687e-11	5.88325e-09	-1.38943e-10	3.20833e-10	-7.22021e-11	-1.83937e-13	5.85383e-09	-1.38804e-10	1.11329e-10	-0.0123342	-3.14217e-05	-0.0237116	0.0190181		58.4167	58.4167		6.19014	-0.000639136	-0.481869	1.93293
263	2022-03-31 12:36:07	3533906	-1.16798e-10	-8.99415e-11	5.8704e-09	-1.24022e-10	3.22876e-10	-7.56851e-11	-1.79883e-13	5.84105e-09	-1.23898e-10	1.12038e-10	-0.0129575	-3.07964e-05	-0.0212116	0.0191811		58.65	58.65		6.18719	-0.000646394	-0.48711	1.93739
264	2022-03-31 12:36:21	3547949	-1.21378e-10	-1.02248e-10	5.87197e-09	-1.41813e-10	3.20564e-10	-7.86529e-11	-2.04496e-13	5.84261e-09	-1.41671e-10	1.11236e-10	-0.013462	-3.50008e-05	-0.0242479	0.0190387		58.8833	58.8833		6.18411	-0.000654071	-0.492413	1.94185
265	2022-03-31 12:36:35	3561993	-1.21947e-10	-9.17434e-11	5.88854e-09	-1.36718e-10	3.15289e-10	-7.90217e-11	-1.83487e-13	5.8591e-09	-1.36581e-10	1.09405e-10	-0.013487	-3.13166e-05	-0.023311	0.0186727		59.1167	59.1167		6.18096	-0.000661808	-0.497962	1.94625
266	2022-03-31 12:36:50	3576036	-1.21098e-10	-9.72514e-11	5.87937e-09	-1.29881e-10	3.19021e-10	-7.84715e-11	-1.94503e-13	5.84997e-09	-1.29751e-10	1.107e-10	-0.013414	-3.32485e-05	-0.0221798	0.0189232		59.3667	59.3667		6.1776	-0.000669878	-0.503648	1.95095
267	2022-03-31 12:37:04	3590079	-1.08402e-10	-8.06965e-11	5.8664e-09	-1.24474e-10	3.12249e-10	-7.02445e-11	-1.61393e-13	5.83707e-09	-1.2435e-10	1.0835e-10	-0.0120342	-2.76497e-05	-0.0213034	0.0185625		59.6	59.6		6.17463	-0.000676983	-0.508721	1.95532
268	2022-03-31 12:37:18	3604122	-1.08241e-10	-9.48046e-11	5.85447e-09	-1.34697e-10	3.1039e-10	-7.01402e-11	-1.89609e-13	5.8252e-09	-1.34562e-10	1.07705e-10	-0.0120408	-3.25498e-05	-0.0231	0.0184896		59.8333	59.8333		6.17182	-0.000684007	-0.513902	1.95964
269	2022-03-31 12:37:32	3618166	-1.11154e-10	-9.29822e-11	5.87226e-09	-1.44512e-10	3.07058e-10	-7.20278e-11	-1.85964e-13	5.8429e-09	-1.44367e-10	1.06549e-10	-0.0123274	-3.18274e-05	-0.0247082	0.0182357		60.0667	60.0667		6.16898	-0.000691517	-0.519479	1.96393
270	2022-03-31 12:37:46	3632209	-1.07478e-10	-9.00439e-11	5.84856e-09	-1.36041e-10	3.0986e-10	-6.96457e-11	-1.80088e-13	5.81932e-09	-1.35905e-10	1.07521e-10	-0.011968	-3.09466e-05	-0.0233541	0.0184766		60.3	60.3		6.16615	-0.000698841	-0.525087	1.96821
271	2022-03-31 12:38:00	3646252	-1.12315e-10	-9.00439e-11	5.855e-09	-1.38642e-10	3.08324e-10	-7.27801e-11	-1.80088e-13	5.82573e-09	-1.38503e-10	1.06988e-10	-0.0124929	-3.09125e-05	-0.0237744	0.0183648		60.5333	60.5333		6.16329	-0.000706058	-0.530585	1.97251
272	2022-03-31 12:38:14	3660296	-1.02006e-10	-9.05455e-11	5.8239e-09	-9.13103e-11	3.02666e-10	-6.60999e-11	-1.81091e-13	5.79478e-09	-9.1219e-11	1.05025e-10	-0.0114068	-3.12507e-05	-0.0157416	0.0181241		60.7667	60.7667		6.1605	-0.00071331	-0.535195	1.97677
273	2022-03-31 12:38:28	3674339	-1.1855e-10	-9.45384e-11	5.82113e-09	-1.33514e-10	2.96906e-10	-7.68204e-11	-1.89077e-13	5.79202e-09	-1.3338e-10	1.03026e-10	-0.0132631	-3.26443e-05	-0.0230283	0.0177876		61	61		6.15763	-0.000720765	-0.539718	1.98096
274	2022-03-31 12:38:42	3688382	-1.19883e-10	-9.33712e-11	5.80794e-09	-1.29257e-10	2.92691e-10	-7.76842e-11	-1.86742e-13	5.7789e-09	-1.29128e-10	1.01564e-10	-0.0134427	-3.23145e-05	-0.0223447	0.0175749		61.2333	61.2333		6.15451	-0.000728343	-0.545012	1.98508
275	2022-03-31 12:38:56	3702425	-1.07413e-10	-9.90533e-11	5.78963e-09	-1.27548e-10	2.97083e-10	-6.96036e-11	-1.98107e-13	5.76068e-09	-1.2742e-10	1.03088e-10	-0.0120825	-3.43894e-05	-0.022119	0.0178951		61.4667	61.4667		6.15153	-0.000736125	-0.550199	1.98922
276	2022-03-31 12:39:10	3716469	-1.11197e-10	-9.09244e-11	5.82057e-09	-1.40136e-10	3.01829e-10	-7.20557e-11	-1.81849e-13	5.79147e-09	-1.39996e-10	1.04735e-10	-0.0124417	-3.13994e-05	-0.0241728	0.0180843		61.7	61.7		6.14867	-0.000743801	-0.5556	1.99342
277	2022-03-31 12:39:24	3730512	-1.1181e-10	-9.52752e-11	5.81659e-09	-1.32418e-10	2.99179e-10	-7.24529e-11	-1.9055e-13	5.78751e-09	-1.32286e-10	1.03815e-10	-0.0125188	-3.29244e-05	-0.0228571	0.0179378		61.9333	61.9333		6.14576	-0.000751305	-0.561087	1.99762
278	2022-03-31 12:39:38	3744555	-1.02049e-10	-8.70441e-11	5.79373e-09	-1.37685e-10	2.90157e-10	-6.61278e-11	-1.74088e-13	5.76476e-09	-1.37547e-10	1.00684e-10	-0.011471	-3.01987e-05	-0.02386	0.0174655		62.1667	62.1667		6.14296	-0.000758669	-0.566537	2.00175
279	2022-03-31 12:39:52	3758599	-1.16594e-10	-9.0351e-11	5.80424e-09	-1.22345e-10	2.88276e-10	-7.55529e-11	-1.80702e-13	5.77522e-09	-1.22223e-10	1.00032e-10	-0.0130823	-3.12892e-05	-0.0211633	0.0173209		62.4	62.4		6.1401	-0.000765843	-0.57179	2.00581
280	2022-03-31 12:40:06	3772642	-1.0794e-10	-7.71849e-11	5.78991e-09	-1.22109e-10	2.97482e-10	-6.99451e-11	-1.5437e-13	5.76096e-09	-1.21987e-10	1.03226e-10	-0.0121412	-2.67958e-05	-0.0211747	0.0179182		62.6333	62.6333		6.13715	-0.00077262	-0.576729	2.00992
281	2022-03-31 12:40:20	3786685	-1.1582e-10	-9.4303e-11	6.32586e-09	-1.42512e-10	2.83292e-10	-7.50514e-11	-1.88606e-13	6.29423e-09	-1.42369e-10	9.83023e-11	-0.0119238	-2.99649e-05	-0.022619	0.0156178		62.8667	62.8667		6.13434	-0.000779242	-0.581838	2.01383
282	2022-03-31 12:40:34	3800729	-1.13734e-10	-9.68419e-11	5.29083e-09	-1.28892e-10	2.95816e-10	-7.36996e-11	-1.93684e-13	5.26438e-09	-1.28763e-10	1.02648e-10	-0.0139997	-3.67914e-05	-0.0244593	0.0194986		63.1	63.1		6.13132	-0.00078703	-0.587331	2.01793
283	2022-03-31 12:40:48	3814772	-1.20797e-10	-9.77114e-11	5.06538e-09	-1.34342e-10	2.94058e-10	-7.82765e-11	-1.95423e-13	5.04005e-09	-1.34208e-10	1.02038e-10	-0.0155309	-3.8774e-05	-0.0266282	0.0202454		63.3333	63.3333		6.12788	-0.000795846	-0.593291	2.02257
284	2022-03-31 12:41:02	3828815	-1.14584e-10	-1.01306e-10	5.00444e-09	-1.43942e-10	2.93336e-10	-7.42504e-11	-2.02612e-13	4.97942e-09	-1.43798e-10	1.01788e-10	-0.0149115	-4.06899e-05	-0.0288785	0.0204417		63.5667	63.5667		6.12432	-0.000805117	-0.599767	2.02731
285	2022-03-31 12:41:16	3842859	-1.20894e-10	-9.72714e-11	5.16969e-09	-1.47199e-10	2.87416e-10	-7.83393e-11	-1.94543e-13	5.14384e-09	-1.47052e-10	9.97334e-11	-0.0152297	-3.78205e-05	-0.0285879	0.0193889		63.8	63.8		6.12081	-0.000814276	-0.606471	2.03196
286	2022-03-31 12:41:30	3856902	-1.12143e-10	-9.59305e-11	5.3361e-09	-1.40384e-10	2.85504e-10	-7.26687e-11	-1.91861e-13	5.30942e-09	-1.40244e-10	9.90699e-11	-0.0136867	-3.6136e-05	-0.0264141	0.0186593		64.0333	64.0333		6.11743	-0.000822904	-0.612888	2.0364
287	2022-03-31 12:41:44	3870945	-1.21259e-10	-1.0108e-10	5.43045e-09	-1.54498e-10	2.85189e-10	-7.85758e-11	-2.0216e-13	5.4033e-09	-1.54344e-10	9.89606e-11	-0.0145422	-3.74142e-05	-0.0285647	0.0183148		64.2667	64.2667		6.11414	-0.000831485	-0.619302	2.04071
288	2022-03-31 12:41:58	3884988	-1.15433e-10	-8.40955e-11	5.71133e-09	-1.42835e-10	2.89574e-10	-7.48006e-11	-1.68191e-13	5.68277e-09	-1.42692e-10	1.00482e-10	-0.0131627	-2.95966e-05	-0.0251096	0.0176819		64.5	64.5		6.11091	-0.000839303	-0.625564	2.04491
289	2022-03-31 12:42:13	3899032	-1.12509e-10	-9.95952e-11	9.41967e-09	-1.29107e-10	3.18652e-10	-7.29058e-11	-1.9919e-13	9.37257e-09	-1.28978e-10	1.10572e-10	-0.00777864	-2.12525e-05	-0.0137612	0.0117974		64.75	64.75		6.10829	-0.000845659	-0.630423	2.0486
290	2022-03-31 12:42:27	3913075	-1.16712e-10	-9.58276e-11	9.41967e-09	-1.25183e-10	2.88399e-10	-7.56294e-11	-1.91655e-13	9.37257e-09	-1.25058e-10	1.00074e-10	-0.00806922	-2.04485e-05	-0.013343	0.0106774		64.9833	64.9833		6.10644	-0.000850524	-0.633585	2.05122
291	2022-03-31 12:42:41	3927118	-1.19496e-10	-1.00947e-10	9.41967e-09	-1.24205e-10	2.63266e-10	-7.74334e-11	-2.01894e-13	9.37257e-09	-1.24081e-10	9.13533e-11	-0.0082617	-2.15409e-05	-0.0132387	0.00974688		65.2167	65.2167		6.10454	-0.000855423	-0.636687	2.0536
292	2022-03-31 12:42:55	3941162	-1.18024e-10	-1.05533e-10	9.41967e-09	-1.2041e-10	2.44446e-10	-7.64796e-11	-2.11066e-13	9.37257e-09	-1.2029e-10	8.48228e-11	-0.00815993	-2.25195e-05	-0.0128342	0.00905011		65.45	65.45		6.10262	-0.000860564	-0.639729	2.0558
293	2022-03-31 12:43:09	3955205	-1.1525e-10	-1.0879e-10	9.41967e-09	-1.08381e-10	2.26425e-10	-7.4682e-11	-2.1758e-13	9.37257e-09	-1.08273e-10	7.85695e-11	-0.00796814	-2.32145e-05	-0.0115521	0.00838292		65.6833	65.6833		6.10074	-0.000865899	-0.642574	2.05783
294	2022-03-31 12:43:23	3969248	-1.2629e-10	-1.05513e-10	9.41967e-09	-1.09488e-10	2.28874e-10	-8.18359e-11	-2.11026e-13	9.37257e-09	-1.09379e-10	7.94193e-11	-0.00873143	-2.25153e-05	-0.0116701	0.00847358		65.9167	65.9167		6.09879	-0.000871234	-0.645283	2.0598
295	2022-03-31 12:43:37	3983292	-1.07112e-10	-1.03199e-10	9.41967e-09	-1.04973e-10	2.09171e-10	-6.94086e-11	-2.06398e-13	9.37257e-09	-1.04868e-10	7.25823e-11	-0.0074055	-2.20215e-05	-0.0111888	0.00774412		66.15	66.15		6.09691	-0.00087643	-0.64795	2.06169
296	2022-03-31 12:43:51	3997335	-1.24506e-10	-9.13544e-11	9.41967e-09	-1.05403e-10	1.97646e-10	-8.06799e-11	-1.82709e-13	9.37257e-09	-1.05298e-10	6.85832e-11	-0.00860808	-1.9494e-05	-0.0112347	0.00731743		66.3833	66.3833		6.09504	-0.000881274	-0.650566	2.06345
297	2022-03-31 12:44:05	4011378	-8.52903e-11	-1.02585e-10	9.41967e-09	-1.00619e-10	6.33972e-10	-5.52681e-11	-2.0517e-13	9.37257e-09	-1.00518e-10	2.19988e-10	-0.00589679	-2.18905e-05	-0.0107247	0.0234715		66.6167	66.6167		6.09335	-0.000886102	-0.653128	2.06704
298	2022-03-31 12:44:19	4025422	3.81454e-09	-9.69029e-11	9.41967e-09	-2.65202e-11	1.78922e-09	2.47182e-09	-1.93806e-13	9.37257e-09	-2.64937e-11	6.20859e-10	0.263729	-2.0678e-05	-0.00282672	0.0662422		66.85	66.85		6.12343	-0.000891068	-0.654709	2.0775
299	2022-03-31 12:44:36	4042716	7.87567e-09	-8.69008e-11	9.41967e-09	-6.77248e-13	2.31356e-09	5.10343e-09	-1.73802e-13	9.37257e-09	-6.76571e-13	8.02805e-10	0.544507	-1.85436e-05	-7.21862e-05	0.0856548		67.1333	67.1333		6.23793	-0.000896625	-0.655119	2.09902
300	2022-03-31 12:44:48	4054549	9.7015e-09	-9.14771e-11	9.41967e-09	1.81459e-11	2.29263e-09	6.28657e-09	-1.82954e-13	9.37257e-09	1.81278e-11	7.95543e-10	0.670741	-1.95202e-05	0.00193413	0.0848799		67.3333	67.3333		6.35945	-0.000900431	-0.654933	2.11608
301	2022-03-31 12:45:01	4067423	1.09058e-08	-9.27365e-11	9.41967e-09	1.85974e-11	2.08469e-09	7.06696e-09	-1.85473e-13	9.37257e-09	1.85788e-11	7.23387e-10	0.754004	-1.97889e-05	0.00198225	0.0771813		67.55	67.55		6.5138	-0.00090469	-0.654509	2.13363
302	2022-03-31 12:45:12	4078726	1.16382e-08	-9.375e-11	9.41967e-09	1.22442e-11	1.82645e-09	7.54155e-09	-1.875e-13	9.37257e-09	1.2232e-11	6.33778e-10	0.804641	-2.00052e-05	0.00130508	0.0676205		67.7333	67.7333		6.65668	-0.000908337	-0.654208	2.14691
303	2022-03-31 12:45:24	4090030	1.22611e-08	-9.0177e-11	9.41967e-09	1.07392e-11	1.57523e-09	7.94519e-09	-1.80354e-13	9.37257e-09	1.07285e-11	5.46605e-10	0.847707	-1.92427e-05	0.00114467	0.0583196		67.9333	67.9333		6.82191	-0.000912262	-0.653963	2.1595
304	2022-03-31 12:45:35	4101333	1.25298e-08	-9.34122e-11	9.41967e-09	6.29949e-12	1.37092e-09	8.11931e-09	-1.86824e-13	9.37257e-09	6.29319e-12	4.75709e-10	0.866284	-1.99331e-05	0.000671448	0.0507555		68.1167	68.1167		6.97903	-0.000915853	-0.653796	2.1695
305	2022-03-31 12:45:46	4112636	1.2695e-08	-9.33508e-11	9.41967e-09	8.69673e-12	1.19804e-09	8.22636e-09	-1.86702e-13	9.37257e-09	8.68803e-12	4.1572e-10	0.877706	-1.992e-05	0.000926964	0.0443549		68.3	68.3		7.13889	-0.000919506	-0.65365	2.17822
306	2022-03-31 12:45:57	4123939	1.29799e-08	-9.77524e-11	9.41967e-09	1.37169e-11	1.05654e-09	8.41098e-09	-1.95505e-13	9.37257e-09	1.37032e-11	3.66619e-10	0.897403	-2.08592e-05	0.00146205	0.0391162		68.4833	68.4833		7.30161	-0.000923245	-0.653431	2.18587
307	2022-03-31 12:46:09	4135243	1.30189e-08	-8.89791e-11	9.41967e-09	7.19173e-12	9.51807e-10	8.43625e-09	-1.77958e-13	9.37257e-09	7.18454e-12	3.30277e-10	0.9001	-1.89871e-05	0.000766549	0.0352387		68.6833	68.6833		7.48136	-0.000927229	-0.653208	2.1933
308	2022-03-31 12:46:20	4146546	1.2898e-08	-8.96241e-11	9.41967e-09	-5.14924e-12	8.63757e-10	8.3579e-09	-1.79248e-13	9.37257e-09	-5.14409e-12	2.99724e-10	0.891741	-1.91248e-05	-0.000548845	0.0319788		68.8667	68.8667		7.64561	-0.000930723	-0.653188	2.19947
309	2022-03-31 12:46:31	4157849	1.13352e-08	-9.72514e-11	9.41967e-09	-3.49589e-11	6.5055e-10	7.34521e-09	-1.94503e-13	9.37257e-09	-3.49239e-11	2.25741e-10	0.783692	-2.07523e-05	-0.00372619	0.0240853		69.05	69.05		7.79919	-0.000934378	-0.65358	2.20461
310	2022-03-31 12:46:43	4169663	6.19353e-09	-9.1252e-11	9.41967e-09	-6.55211e-11	5.4775e-10	4.01341e-09	-1.82504e-13	9.37257e-09	-6.54556e-11	1.90069e-10	0.428208	-1.94721e-05	-0.00698374	0.0202793		69.25	69.25		7.92038	-0.000938401	-0.654651	2.20904
311	2022-03-31 12:46:55	4181496	4.19789e-09	-9.9381e-11	9.41967e-09	-7.62066e-11	4.88072e-10	2.72023e-09	-1.98762e-13	9.37257e-09	-7.61304e-11	1.69361e-10	0.290233	-2.12068e-05	-0.00812268	0.0180699		69.45	69.45		7.99223	-0.000942469	-0.656161	2.21288
312	2022-03-31 12:47:07	4193329	2.96679e-09	-1.09936e-10	9.41967e-09	-9.39763e-11	4.4306e-10	1.92248e-09	-2.19872e-13	9.37257e-09	-9.38823e-11	1.53742e-10	0.205118	-2.34591e-05	-0.0100167	0.0164034		69.65	69.65		8.04176	-0.000946935	-0.657975	2.21632
313	2022-03-31 12:47:19	4205163	2.12631e-09	-9.92371e-11	9.41967e-09	-1.06661e-10	3.97304e-10	1.37785e-09	-1.98474e-13	9.37257e-09	-1.06554e-10	1.37864e-10	0.147009	-2.11761e-05	-0.0113687	0.0147094		69.85	69.85		8.07698	-0.000951399	-0.660114	2.21944
314	2022-03-31 12:47:30	4216996	1.55081e-09	-1.03302e-10	9.41967e-09	-1.04726e-10	3.68586e-10	1.00492e-09	-2.06604e-13	9.37257e-09	-1.04621e-10	1.27899e-10	0.10722	-2.20435e-05	-0.0111625	0.0136461		70.0333	70.0333		8.10028	-0.00095536	-0.662179	2.22203
315	2022-03-31 12:47:42	4228829	1.12961e-09	-1.00271e-10	9.41967e-09	-1.15035e-10	3.4489e-10	7.31987e-10	-2.00542e-13	9.37257e-09	-1.1492e-10	1.19677e-10	0.0780989	-2.13967e-05	-0.0122613	0.0127688		70.2333	70.2333		8.11881	-0.000959704	-0.664522	2.22468
316	2022-03-31 12:47:55	4241703	7.45844e-10	-1.11206e-10	9.41967e-09	-1.13466e-10	3.21785e-10	4.83307e-10	-2.22412e-13	9.37257e-09	-1.13353e-10	1.11659e-10	0.0515661	-2.37301e-05	-0.0120941	0.0119134		70.45	70.45		8.13286	-0.000964593	-0.66716	2.22735
317	2022-03-31 12:48:09	4255747	5.18202e-10	-1.11277e-10	9.41967e-09	-1.18593e-10	3.04554e-10	3.35795e-10	-2.22554e-13	9.37257e-09	-1.18474e-10	1.0568e-10	0.0358274	-2.37452e-05	-0.0126405	0.0112755		70.6833	70.6833		8.14306	-0.000970132	-0.670046	2.23006
318	2022-03-31 12:48:23	4269790	3.45633e-10	-1.07632e-10	9.41967e-09	-1.22657e-10	2.91201e-10	2.2397e-10	-2.15264e-13	9.37257e-09	-1.22534e-10	1.01047e-10	0.0238963	-2.29674e-05	-0.0130737	0.0107811		70.9167	70.9167		8.15002	-0.000975582	-0.673046	2.23263
319	2022-03-31 12:48:37	4283833	2.0397e-10	-1.13417e-10	9.41967e-09	-1.25097e-10	4.46639e-10	1.32173e-10	-2.26834e-13	9.37257e-09	-1.24972e-10	1.54984e-10	0.0141021	-2.42019e-05	-0.0133338	0.0165359		71.15	71.15		8.15446	-0.000981085	-0.676127	2.23582
320	2022-03-31 12:48:51	4297877	9.74378e-11	-1.03281e-10	9.41967e-09	-1.26989e-10	5.83594e-10	6.31397e-11	-2.06562e-13	9.37257e-09	-1.26862e-10	2.02507e-10	0.00673665	-2.2039e-05	-0.0135355	0.0216064		71.3833	71.3833		8.15689	-0.00098648	-0.679261	2.24027
321	2022-03-31 12:49:05	4311920	5.51474e-12	-1.0363e-10	9.41967e-09	-1.36997e-10	6.44484e-10	3.57355e-12	-2.0726e-13	9.37257e-09	-1.3686e-10	2.23636e-10	0.000381278	-2.21135e-05	-0.0146022	0.0238607		71.6167	71.6167		8.15772	-0.000991631	-0.682544	2.24557
322	2022-03-31 12:49:19	4325963	-3.06267e-11	-1.14308e-10	9.41967e-09	-1.37481e-10	6.64971e-10	-1.98461e-11	-2.28616e-13	9.37257e-09	-1.37344e-10	2.30745e-10	-0.00211747	-2.4392e-05	-0.0146538	0.0246192		71.85	71.85		8.15752	-0.000997056	-0.685957	2.25123
323	2022-03-31 12:49:34	4340007	-6.82946e-11	-1.0711e-10	9.41967e-09	-1.36847e-10	6.48454e-10	-4.42549e-11	-2.1422e-13	9.37257e-09	-1.3671e-10	2.25014e-10	-0.00472175	-2.28561e-05	-0.0145862	0.0240077		72.1	72.1		8.15666	-0.00100296	-0.689612	2.2573
324	2022-03-31 12:49:48	4354050	-8.00658e-11	-1.11564e-10	9.41967e-09	-1.40115e-10	6.39001e-10	-5.18826e-11	-2.23128e-13	9.37257e-09	-1.39975e-10	2.21733e-10	-0.00553558	-2.38065e-05	-0.0149345	0.0236577		72.3333	72.3333		8.15546	-0.00100841	-0.693056	2.26287
325	2022-03-31 12:50:02	4368093	-8.35811e-11	-1.03199e-10	9.41967e-09	-1.39534e-10	6.25472e-10	-5.41606e-11	-2.06398e-13	9.37257e-09	-1.39394e-10	2.17039e-10	-0.00577862	-2.20215e-05	-0.0148726	0.0231568		72.5667	72.5667		8.15414	-0.00101375	-0.696534	2.26833
326	2022-03-31 12:50:16	4382137	-9.22563e-11	-1.06537e-10	9.41967e-09	-1.26194e-10	5.84215e-10	-5.97821e-11	-2.13074e-13	9.37257e-09	-1.26068e-10	2.02723e-10	-0.00637841	-2.27338e-05	-0.0134507	0.0216293		72.8	72.8		8.15273	-0.00101897	-0.699838	2.27355
327	2022-03-31 12:50:30	4396180	-9.10953e-11	-9.44155e-11	9.41967e-09	-1.50059e-10	5.67814e-10	-5.90298e-11	-1.88831e-13	9.37257e-09	-1.49909e-10	1.97031e-10	-0.00629814	-2.01472e-05	-0.0159944	0.0210221		73.0333	73.0333		8.15125	-0.00102398	-0.703274	2.27853
328	2022-03-31 12:50:44	4410223	-9.7771e-11	-1.0752e-10	9.40933e-09	-1.33117e-10	5.37729e-10	-6.33556e-11	-2.1504e-13	9.36228e-09	-1.32984e-10	1.86592e-10	-0.00676711	-2.29688e-05	-0.0142042	0.0199302		73.2667	73.2667		8.14972	-0.00102901	-0.706797	2.28331
329	2022-03-31 12:50:58	4424267	-1.06446e-10	-9.99333e-11	8.22718e-09	-1.49672e-10	5.18341e-10	-6.8977e-11	-1.99867e-13	8.18604e-09	-1.49522e-10	1.79864e-10	-0.00842617	-2.44155e-05	-0.0182655	0.0219721		73.5	73.5		8.14795	-0.00103454	-0.710585	2.28819
330	2022-03-31 12:51:12	4438310	-1.17024e-10	-9.57667e-11	7.45904e-09	-1.44963e-10	5.00588e-10	-7.58316e-11	-1.91533e-13	7.42174e-09	-1.44818e-10	1.73704e-10	-0.0102175	-2.58071e-05	-0.0195127	0.0234047		73.7333	73.7333		8.14577	-0.00104039	-0.714992	2.29349
331	2022-03-31 12:51:26	4452353	-1.03425e-10	-1.16355e-10	7.02394e-09	-1.4693e-10	4.77345e-10	-6.70194e-11	-2.3271e-13	6.98882e-09	-1.46783e-10	1.65639e-10	-0.00958952	-3.32975e-05	-0.0210026	0.0237005		73.9667	73.9667		8.14346	-0.00104729	-0.719719	2.29898
332	2022-03-31 12:51:40	4466397	-1.06553e-10	-1.15976e-10	6.6937e-09	-1.38739e-10	4.59078e-10	-6.90463e-11	-2.31952e-13	6.66023e-09	-1.386e-10	1.593e-10	-0.010367	-3.48264e-05	-0.0208101	0.0239181		74.2	74.2		8.14114	-0.00105524	-0.724597	2.30454
333	2022-03-31 12:51:54	4480440	-1.18851e-10	-1.04182e-10	6.48666e-09	-1.53402e-10	4.58333e-10	-7.70154e-11	-2.08364e-13	6.45423e-09	-1.53249e-10	1.59042e-10	-0.0119326	-3.22833e-05	-0.0237439	0.0246415		74.4333	74.4333		8.13853	-0.00106307	-0.729795	2.3102
334	2022-03-31 12:52:08	4494483	-1.1496e-10	-9.79067e-11	6.35927e-09	-1.37481e-10	4.39251e-10	-7.44941e-11	-1.95813e-13	6.32747e-09	-1.37344e-10	1.5242e-10	-0.0117731	-3.09465e-05	-0.0217059	0.0240886		74.6667	74.6667		8.13577	-0.00107044	-0.735098	2.31589
335	2022-03-31 12:52:22	4508527	-1.26591e-10	-1.12383e-10	6.27411e-09	-1.51316e-10	4.1746e-10	-8.2031e-11	-2.24766e-13	6.24274e-09	-1.51165e-10	1.44859e-10	-0.0131402	-3.60044e-05	-0.0242145	0.0232043		74.9	74.9		8.13286	-0.00107826	-0.740455	2.32141
336	2022-03-31 12:52:36	4522570	-1.28064e-10	-1.00783e-10	6.18962e-09	-1.38814e-10	3.99162e-10	-8.29855e-11	-2.01566e-13	6.15867e-09	-1.38675e-10	1.38509e-10	-0.0134746	-3.27288e-05	-0.0225171	0.0224901		75.1333	75.1333		8.12976	-0.00108627	-0.745907	2.32674
337	2022-03-31 12:52:50	4536613	-1.14175e-10	-1.17297e-10	6.13534e-09	-1.26828e-10	3.99446e-10	-7.39854e-11	-2.34594e-13	6.10466e-09	-1.26701e-10	1.38608e-10	-0.0121195	-3.84287e-05	-0.0207548	0.0227052		75.3667	75.3667		8.12677	-0.00109458	-0.750955	2.33201
338	2022-03-31 12:53:04	4550657	-1.2385e-10	-1.06916e-10	6.0936e-09	-1.49113e-10	3.87866e-10	-8.02548e-11	-2.13832e-13	6.06313e-09	-1.48964e-10	1.3459e-10	-0.0132365	-3.52676e-05	-0.0245688	0.022198		75.6	75.6		8.12381	-0.00110317	-0.756243	2.33725
339	2022-03-31 12:53:18	4564700	-1.20991e-10	-9.87152e-11	6.0555e-09	-1.45769e-10	3.91521e-10	-7.84022e-11	-1.9743e-13	6.02522e-09	-1.45623e-10	1.35858e-10	-0.0130123	-3.27673e-05	-0.0241689	0.0225482		75.8333	75.8333		8.12075	-0.00111111	-0.761929	2.34247
340	2022-03-31 12:53:32	4578743	-1.2084e-10	-9.4395e-11	6.05139e-09	-1.36417e-10	3.80119e-10	-7.83043e-11	-1.8879e-13	6.02113e-09	-1.36281e-10	1.31901e-10	-0.0130049	-3.13546e-05	-0.0226337	0.0219064		76.0667	76.0667		8.11771	-0.00111859	-0.76739	2.34766
341	2022-03-31 12:53:46	4592787	-1.19217e-10	-1.05339e-10	5.99737e-09	-1.44576e-10	3.68847e-10	-7.72526e-11	-2.10678e-13	5.96738e-09	-1.44431e-10	1.2799e-10	-0.0129458	-3.53049e-05	-0.0242035	0.0214482		76.3	76.3		8.11469	-0.00112637	-0.772854	2.35271
342	2022-03-31 12:54:00	4606830	-1.18486e-10	-1.02166e-10	5.96728e-09	-1.41007e-10	3.64646e-10	-7.67789e-11	-2.04332e-13	5.93744e-09	-1.40866e-10	1.26532e-10	-0.0129313	-3.44141e-05	-0.023725	0.0213109		76.5333	76.5333		8.11167	-0.0011345	-0.778446	2.3577
343	2022-03-31 12:54:14	4620873	-1.16529e-10	-1.00496e-10	5.96123e-09	-1.36008e-10	3.58159e-10	-7.55108e-11	-2.00992e-13	5.93142e-09	-1.35872e-10	1.24281e-10	-0.0127306	-3.3886e-05	-0.0229071	0.020953		76.7667	76.7667		8.10867	-0.00114247	-0.783886	2.36263
344	2022-03-31 12:54:28	4634917	-1.25291e-10	-1.03507e-10	5.95334e-09	-1.47597e-10	3.53689e-10	-8.11886e-11	-2.07014e-13	5.92357e-09	-1.47449e-10	1.2273e-10	-0.013706	-3.49475e-05	-0.024892	0.0207189		77	77		8.10559	-0.0011505	-0.789463	2.3675
345	2022-03-31 12:54:42	4648960	-1.13928e-10	-1.02175e-10	5.91587e-09	-1.47382e-10	3.54956e-10	-7.38253e-11	-2.0435e-13	5.88629e-09	-1.47235e-10	1.2317e-10	-0.0125419	-3.47163e-05	-0.0250131	0.0209248		77.2333	77.2333		8.10253	-0.00115863	-0.795285	2.37235
346	2022-03-31 12:54:57	4663003	-1.12057e-10	-9.96981e-11	5.91058e-09	-1.41115e-10	3.43792e-10	-7.26129e-11	-1.99396e-13	5.88103e-09	-1.40974e-10	1.19296e-10	-0.012347	-3.3905e-05	-0.023971	0.0202849		77.4833	77.4833		8.09942	-0.00116721	-0.801408	2.37751
347	2022-03-31 12:55:11	4677046	-1.20066e-10	-9.90733e-11	5.91559e-09	-1.46726e-10	3.41542e-10	-7.78028e-11	-1.98147e-13	5.88601e-09	-1.46579e-10	1.18515e-10	-0.0132182	-3.3664e-05	-0.024903	0.020135		77.7167	77.7167		8.09643	-0.00117509	-0.80711	2.38222
348	2022-03-31 12:55:25	4691090	-1.11058e-10	-1.05943e-10	5.90202e-09	-1.45952e-10	3.41296e-10	-7.19656e-11	-2.11886e-13	5.87251e-09	-1.45806e-10	1.1843e-10	-0.0122547	-3.6081e-05	-0.0248286	0.0201668		77.95	77.95		8.09346	-0.00118323	-0.812912	2.38692
349	2022-03-31 12:55:39	4705133	-1.07188e-10	-9.84695e-11	5.87018e-09	-1.39749e-10	3.28757e-10	-6.94578e-11	-1.96939e-13	5.84083e-09	-1.39609e-10	1.14079e-10	-0.0118918	-3.37176e-05	-0.0239023	0.0195312		78.1833	78.1833		8.09064	-0.00119137	-0.818597	2.39155
350	2022-03-31 12:55:53	4719176	-1.24388e-10	-9.461e-11	5.87951e-09	-1.44834e-10	3.30024e-10	-8.06034e-11	-1.8922e-13	5.85011e-09	-1.44689e-10	1.14518e-10	-0.0137781	-3.23447e-05	-0.0247327	0.0195754		78.4167	78.4167		8.08765	-0.00119908	-0.824271	2.39612
351	2022-03-31 12:56:07	4733220	-1.21851e-10	-1.04787e-10	5.86291e-09	-1.38416e-10	3.19205e-10	-7.89594e-11	-2.09574e-13	5.8336e-09	-1.38278e-10	1.10764e-10	-0.0135353	-3.59254e-05	-0.0237037	0.0189873		78.65	78.65		8.08446	-0.00120704	-0.829922	2.40062
352	2022-03-31 12:56:21	4747263	-1.12982e-10	-1.05595e-10	5.84038e-09	-1.41416e-10	3.27981e-10	-7.32123e-11	-2.1119e-13	5.81118e-09	-1.41275e-10	1.13809e-10	-0.0125985	-3.6342e-05	-0.0243108	0.0195846		78.8833	78.8833		8.08141	-0.00121547	-0.835524	2.40512
353	2022-03-31 12:56:35	4761306	-1.29472e-10	-9.98314e-11	5.84125e-09	-1.3861e-10	3.16003e-10	-8.38979e-11	-1.99663e-13	5.81204e-09	-1.38471e-10	1.09653e-10	-0.0144352	-3.43533e-05	-0.0238249	0.0188665		79.1167	79.1167		8.07826	-0.00122372	-0.84114	2.4096
354	2022-03-31 12:56:49	4775350	-1.2844e-10	-1.0539e-10	5.85227e-09	-1.32536e-10	3.20226e-10	-8.32291e-11	-2.1078e-13	5.82301e-09	-1.32403e-10	1.11118e-10	-0.0142931	-3.61978e-05	-0.022738	0.0190826		79.35	79.35		8.07491	-0.00123195	-0.846572	2.41403
355	2022-03-31 12:57:03	4789393	-1.19593e-10	-9.59305e-11	5.81944e-09	-1.39782e-10	3.06751e-10	-7.74963e-11	-1.91861e-13	5.79034e-09	-1.39642e-10	1.06443e-10	-0.0133837	-3.31347e-05	-0.0241164	0.0183828		79.5833	79.5833		8.07168	-0.00124004	-0.852038	2.4184
356	2022-03-31 12:57:17	4803436	-1.18314e-10	-9.50912e-11	5.8294e-09	-1.34202e-10	3.08248e-10	-7.66675e-11	-1.90182e-13	5.80025e-09	-1.34068e-10	1.06962e-10	-0.013218	-3.27886e-05	-0.0231141	0.0184409		79.8167	79.8167		8.06858	-0.00124773	-0.857548	2.4227
357	2022-03-31 12:57:31	4817479	-1.22291e-10	-8.72693e-11	5.83348e-09	-1.35912e-10	3.10029e-10	-7.92446e-11	-1.74539e-13	5.80431e-09	-1.35776e-10	1.0758e-10	-0.0136527	-3.00705e-05	-0.0233923	0.0185345		80.05	80.05		8.06544	-0.00125507	-0.862974	2.42701
358	2022-03-31 12:57:45	4831523	-1.1338e-10	-9.94314e-11	5.78364e-09	-1.3187e-10	3.05015e-10	-7.34702e-11	-1.98863e-13	5.75472e-09	-1.31738e-10	1.0584e-10	-0.0127669	-3.45565e-05	-0.0228922	0.0183919		80.2833	80.2833		8.06236	-0.00126261	-0.868374	2.43132
359	2022-03-31 12:57:59	4845566	-1.11724e-10	-1.00793e-10	5.81118e-09	-1.47092e-10	3.09139e-10	-7.23972e-11	-2.01586e-13	5.78212e-09	-1.46945e-10	1.07271e-10	-0.0125209	-3.48637e-05	-0.0254137	0.0185522		80.5167	80.5167		8.05941	-0.0012707	-0.87401	2.43563
360	2022-03-31 12:58:13	4859609	-1.24871e-10	-1.01848e-10	5.7848e-09	-1.42523e-10	3.01829e-10	-8.09164e-11	-2.03696e-13	5.75588e-09	-1.4238e-10	1.04735e-10	-0.0140581	-3.53892e-05	-0.0247365	0.0181961		80.75	80.75		8.05631	-0.0012789	-0.879861	2.43992
361	2022-03-31 12:58:27	4873653	-1.26581e-10	-9.6801e-11	5.79434e-09	-1.55778e-10	2.87746e-10	-8.20245e-11	-1.93602e-13	5.76537e-09	-1.55622e-10	9.98479e-11	-0.0142271	-3.35802e-05	-0.0269926	0.0173186		80.9833	80.9833		8.05301	-0.00128695	-0.885896	2.44406
362	2022-03-31 12:58:41	4887696	-1.3288e-10	-1.10591e-10	5.76742e-09	-1.5309e-10	2.96054e-10	-8.61062e-11	-2.21182e-13	5.73858e-09	-1.52937e-10	1.02731e-10	-0.0150048	-3.8543e-05	-0.0266506	0.0179018		81.2167	81.2167		8.0496	-0.00129536	-0.892154	2.44817
363	2022-03-31 12:58:55	4901739	-1.21775e-10	-1.0022e-10	5.78427e-09	-1.49381e-10	2.85519e-10	-7.89102e-11	-2.0044e-13	5.75535e-09	-1.49232e-10	9.90751e-11	-0.0137108	-3.48267e-05	-0.0259292	0.0172144		81.45	81.45		8.04625	-0.00130392	-0.898288	2.45227
364	2022-03-31 12:59:09	4915782	-1.17357e-10	-1.0923e-10	5.78185e-09	-1.34589e-10	3.0169e-10	-7.60473e-11	-2.1846e-13	5.75294e-09	-1.34454e-10	1.04686e-10	-0.0132189	-3.79736e-05	-0.0233714	0.018197		81.6833	81.6833		8.04311	-0.00131241	-0.90404	2.4564
365	2022-03-31 12:59:23	4929826	-1.27021e-10	-1.06281e-10	5.79272e-09	-1.36675e-10	2.88959e-10	-8.23096e-11	-2.12562e-13	5.76376e-09	-1.36538e-10	1.00269e-10	-0.0142805	-3.68791e-05	-0.0236891	0.0173964		81.9167	81.9167		8.0399	-0.00132115	-0.909531	2.46055
366	2022-03-31 12:59:37	4943869	-1.18303e-10	-9.84486e-11	5.77488e-09	-1.43523e-10	2.83922e-10	-7.66603e-11	-1.96897e-13	5.74601e-09	-1.43379e-10	9.85209e-11	-0.0133415	-3.42668e-05	-0.0249529	0.017146		82.15	82.15		8.03668	-0.00132945	-0.915205	2.46458
367	2022-03-31 12:59:51	4957912	-1.21829e-10	-9.6381e-11	5.77871e-09	-1.46167e-10	2.92e-10	-7.89452e-11	-1.92762e-13	5.74982e-09	-1.46021e-10	1.01324e-10	-0.01373	-3.35249e-05	-0.0253957	0.0176221		82.3833	82.3833		8.03352	-0.00133736	-0.921079	2.46864
368	2022-03-31 13:00:05	4971956	-1.30569e-10	-9.7179e-11	5.80278e-09	-1.4162e-10	2.91232e-10	-8.46087e-11	-1.94358e-13	5.77377e-09	-1.41478e-10	1.01058e-10	-0.014654	-3.36623e-05	-0.0245037	0.0175029		82.6167	82.6167		8.03021	-0.0013452	-0.926901	2.47273
369	2022-03-31 13:00:19	4985999	-1.2428e-10	-9.934e-11	5.77333e-09	-1.43157e-10	2.81549e-10	-8.05334e-11	-1.9868e-13	5.74446e-09	-1.43014e-10	9.76975e-11	-0.0140193	-3.45863e-05	-0.0248959	0.0170072		82.85	82.85		8.02686	-0.00135316	-0.932664	2.47676
370	2022-03-31 13:00:34	5000042	-1.19281e-10	-9.92886e-11	5.75972e-09	-1.40276e-10	2.80943e-10	-7.72941e-11	-1.98577e-13	5.73092e-09	-1.40136e-10	9.74872e-11	-0.0134872	-3.46501e-05	-0.0244526	0.0170107		83.1	83.1		8.02342	-0.00136181	-0.938833	2.48101
371	2022-03-31 13:00:48	5014085	-1.19378e-10	-1.06087e-10	5.75611e-09	-1.42297e-10	2.81142e-10	-7.73569e-11	-2.12174e-13	5.72733e-09	-1.42155e-10	9.75563e-11	-0.0135066	-3.70459e-05	-0.0248204	0.0170335		83.3333	83.3333		8.02027	-0.00137018	-0.944581	2.48498
372	2022-03-31 13:01:02	5028129	-1.15164e-10	-1.03936e-10	5.75696e-09	-1.47242e-10	2.67682e-10	-7.46263e-11	-2.07872e-13	5.72818e-09	-1.47095e-10	9.28857e-11	-0.0130279	-3.62894e-05	-0.0256792	0.0162156		83.5667	83.5667		8.01718	-0.00137873	-0.950473	2.48886
373	2022-03-31 13:01:16	5042172	-1.22216e-10	-1.12025e-10	5.75568e-09	-1.44264e-10	2.53569e-10	-7.9196e-11	-2.2405e-13	5.7269e-09	-1.4412e-10	8.79884e-11	-0.0138288	-3.91224e-05	-0.0251654	0.0153641		83.8	83.8		8.01404	-0.00138753	-0.956405	2.49255
374	2022-03-31 13:01:30	5056215	-1.26387e-10	-9.93086e-11	5.75522e-09	-1.45909e-10	2.82294e-10	-8.18988e-11	-1.98617e-13	5.72644e-09	-1.45763e-10	9.7956e-11	-0.0143019	-3.46842e-05	-0.0254544	0.0171059		84.0333	84.0333		8.01076	-0.00139614	-0.962311	2.49633
375	2022-03-31 13:01:44	5070259	-1.20636e-10	-1.00353e-10	5.08636e-09	-1.38986e-10	2.85051e-10	-7.81721e-11	-2.00706e-13	5.06093e-09	-1.38847e-10	9.89127e-11	-0.0154462	-3.96579e-05	-0.0274351	0.0195444		84.2667	84.2667		8.00729	-0.00140481	-0.968481	2.50061
376	2022-03-31 13:01:58	5084302	-1.24914e-10	-1.04438e-10	5.00918e-09	-1.42136e-10	2.88851e-10	-8.09443e-11	-2.08876e-13	4.98413e-09	-1.41994e-10	1.00231e-10	-0.0162404	-4.19082e-05	-0.0284892	0.0201101		84.5	84.5		8.00359	-0.00141433	-0.975005	2.50524
377	2022-03-31 13:02:12	5098345	-1.15411e-10	-1.03332e-10	5.11283e-09	-1.45318e-10	2.82924e-10	-7.47863e-11	-2.06664e-13	5.08727e-09	-1.45173e-10	9.81746e-11	-0.0147007	-4.06238e-05	-0.0285365	0.0192981		84.7333	84.7333		7.99998	-0.00142396	-0.981658	2.50983
378	2022-03-31 13:02:26	5112388	-1.24108e-10	-1.00487e-10	5.27938e-09	-1.41867e-10	2.78294e-10	-8.0422e-11	-2.00974e-13	5.25298e-09	-1.41725e-10	9.6568e-11	-0.0153098	-3.8259e-05	-0.0269799	0.0183835		84.9667	84.9667		7.99648	-0.00143316	-0.988135	2.51423
379	2022-03-31 13:02:40	5126432	-1.24259e-10	-1.06895e-10	5.36237e-09	-1.39309e-10	2.91424e-10	-8.05198e-11	-2.1379e-13	5.33556e-09	-1.3917e-10	1.01124e-10	-0.0150912	-4.00689e-05	-0.0260834	0.0189529		85.2	85.2		7.99294	-0.0014423	-0.994326	2.51859
380	2022-03-31 13:02:54	5140475	-1.2614e-10	-9.95238e-11	5.45728e-09	-1.44576e-10	2.66622e-10	-8.17387e-11	-1.99048e-13	5.42999e-09	-1.44431e-10	9.25178e-11	-0.0150532	-3.66571e-05	-0.0265988	0.0170383		85.4333	85.4333		7.98942	-0.00145125	-1.00047	2.52279
381	2022-03-31 13:03:08	5154518	-1.24689e-10	-1.0063e-10	9.41967e-09	-1.31579e-10	3.0513e-10	-8.07985e-11	-2.0126e-13	9.37257e-09	-1.31447e-10	1.0588e-10	-0.00862074	-2.14733e-05	-0.0140247	0.0112968		85.6667	85.6667		7.98666	-0.00145803	-1.00521	2.52609
382	2022-03-31 13:03:22	5168562	-1.13046e-10	-9.8981e-11	9.41967e-09	-1.42684e-10	3.08386e-10	-7.32538e-11	-1.97962e-13	9.37257e-09	-1.42541e-10	1.0701e-10	-0.00781576	-2.11214e-05	-0.0152083	0.0114174		85.9	85.9		7.98474	-0.001463	-1.00862	2.52874
383	2022-03-31 13:03:36	5182605	-1.36546e-10	-1.10704e-10	9.41967e-09	-1.35933e-10	2.60464e-10	-8.84818e-11	-2.21408e-13	9.37257e-09	-1.35797e-10	9.0381e-11	-0.0094405	-2.3623e-05	-0.0144888	0.00964314		86.1333	86.1333		7.98273	-0.00146822	-1.01209	2.5312
384	2022-03-31 13:03:50	5196648	-1.29053e-10	-1.174e-10	9.41967e-09	-1.23065e-10	2.405e-10	-8.36263e-11	-2.348e-13	9.37257e-09	-1.22942e-10	8.34535e-11	-0.00892245	-2.50518e-05	-0.0131172	0.00890401		86.3667	86.3667		7.98058	-0.0014739	-1.01531	2.53336
385	2022-03-31 13:04:04	5210692	-1.24506e-10	-1.02227e-10	9.41967e-09	-1.30107e-10	2.28045e-10	-8.06799e-11	-2.04454e-13	9.37257e-09	-1.29977e-10	7.91316e-11	-0.00860808	-2.18141e-05	-0.0138678	0.00844289		86.6	86.6		7.97854	-0.00147937	-1.01846	2.53539
386	2022-03-31 13:04:18	5224735	-1.27333e-10	-1.07776e-10	9.41967e-09	-1.22087e-10	2.08787e-10	-8.25118e-11	-2.15552e-13	9.37257e-09	-1.21965e-10	7.24491e-11	-0.00880354	-2.29982e-05	-0.013013	0.00772991		86.8333	86.8333		7.97651	-0.0014846	-1.02159	2.53727
387	2022-03-31 13:04:32	5238778	-1.34783e-10	-1.08431e-10	9.41967e-09	-1.28172e-10	2.02261e-10	-8.73394e-11	-2.16862e-13	9.37257e-09	-1.28044e-10	7.01846e-11	-0.00931861	-2.31379e-05	-0.0136615	0.00748829		87.0667	87.0667		7.97439	-0.00148998	-1.0247	2.53905
388	2022-03-31 13:04:46	5252822	-1.30322e-10	-1.23256e-10	9.41967e-09	-1.23517e-10	1.90751e-10	-8.44487e-11	-2.46512e-13	9.37257e-09	-1.23393e-10	6.61906e-11	-0.00901019	-2.63014e-05	-0.0131654	0.00706216		87.3	87.3		7.97226	-0.00149575	-1.02783	2.54075
389	2022-03-31 13:05:00	5266865	-1.33923e-10	-1.07848e-10	9.41967e-09	-1.25258e-10	3.14989e-10	-8.67821e-11	-2.15696e-13	9.37257e-09	-1.25133e-10	1.09301e-10	-0.00925916	-2.30135e-05	-0.013351	0.0116618		87.5333	87.5333		7.97012	-0.0015015	-1.03093	2.54293
390	2022-03-31 13:05:14	5280908	1.46376e-09	-1.0108e-10	9.41967e-09	-6.31561e-11	1.43769e-09	9.48516e-10	-2.0216e-13	9.37257e-09	-6.30929e-11	4.98878e-10	0.101201	-2.15693e-05	-0.00673166	0.0532275		87.7667	87.7667		7.98085	-0.0015067	-1.03327	2.5505
391	2022-03-31 13:05:32	5298203	6.68293e-09	-1.05278e-10	9.41967e-09	-2.85949e-11	2.11186e-09	4.33054e-09	-2.10556e-13	9.37257e-09	-2.85663e-11	7.32815e-10	0.462044	-2.24651e-05	-0.00304786	0.0781872		88.0667	88.0667		8.06534	-0.00151331	-1.03474	2.57021
392	2022-03-31 13:05:44	5310036	8.53049e-09	-1.11635e-10	9.41967e-09	-1.18249e-12	2.22891e-09	5.52776e-09	-2.2327e-13	9.37257e-09	-1.18131e-12	7.73432e-10	0.58978	-2.38216e-05	-0.000126039	0.0825208		88.2667	88.2667		8.17052	-0.00151794	-1.03505	2.58628
393	2022-03-31 13:05:55	5321869	9.96003e-09	-8.37987e-11	9.41967e-09	1.27924e-12	2.09795e-09	6.4541e-09	-1.67597e-13	9.37257e-09	1.27796e-12	7.27989e-10	0.688616	-1.78817e-05	0.000136351	0.0776722		88.45	88.45		8.28771	-0.00152176	-1.03505	2.60097
394	2022-03-31 13:06:08	5334743	1.11692e-08	-9.44565e-11	9.41967e-09	9.05148e-12	1.84334e-09	7.23764e-09	-1.88913e-13	9.37257e-09	9.04243e-12	6.39639e-10	0.772215	-2.01559e-05	0.000964776	0.0682458		88.6667	88.6667		8.44596	-0.00152588	-1.03493	2.61678
395	2022-03-31 13:06:20	5346047	1.1778e-08	-1.02411e-10	9.41967e-09	1.26849e-12	1.59662e-09	7.63214e-09	-2.04822e-13	9.37257e-09	1.26722e-12	5.54027e-10	0.814306	-2.18533e-05	0.000135205	0.0591115		88.8667	88.8667		8.60461	-0.00153008	-1.03482	2.62951
396	2022-03-31 13:06:31	5357350	1.21206e-08	-9.15079e-11	9.41967e-09	-2.34349e-12	1.37906e-09	7.85415e-09	-1.83016e-13	9.37257e-09	-2.34115e-12	4.78534e-10	0.837993	-1.95267e-05	-0.000249787	0.0510568		89.05	89.05		8.75608	-0.00153387	-1.03483	2.63961
397	2022-03-31 13:06:42	5368653	1.24538e-08	-1.12506e-10	9.41967e-09	6.87998e-13	1.20415e-09	8.07006e-09	-2.25012e-13	9.37257e-09	6.8731e-13	4.1784e-10	0.86103	-2.40075e-05	7.33321e-05	0.0445812		89.2333	89.2333		8.91182	-0.00153787	-1.03485	2.64838
398	2022-03-31 13:06:53	5379957	1.25741e-08	-9.9299e-11	9.41967e-09	-1.58024e-12	1.05104e-09	8.14802e-09	-1.98598e-13	9.37257e-09	-1.57866e-12	3.64711e-10	0.869347	-2.11893e-05	-0.000168434	0.0389126		89.4167	89.4167		9.07044	-0.00154201	-1.03486	2.65603
399	2022-03-31 13:07:05	5391260	1.28362e-08	-1.08329e-10	9.41967e-09	-6.44999e-14	9.31486e-10	8.31786e-09	-2.16658e-13	9.37257e-09	-6.44354e-14	3.23226e-10	0.887468	-2.31162e-05	-6.87489e-06	0.0344863		89.6167	89.6167		9.24612	-0.00154644	-1.03488	2.66337
400	2022-03-31 13:07:16	5402563	1.29584e-08	-9.8981e-11	9.41967e-09	-1.18034e-11	8.40879e-10	8.39704e-09	-1.97962e-13	9.37257e-09	-1.17916e-11	2.91785e-10	0.895917	-2.11214e-05	-0.0012581	0.0311318		89.8	89.8		9.4096	-0.00155049	-1.03499	2.66939
401	2022-03-31 13:07:27	5413866	1.17612e-08	-1.09865e-10	9.41967e-09	-1.79847e-11	6.88813e-10	7.62126e-09	-2.1973e-13	9.37257e-09	-1.79667e-11	2.39018e-10	0.813145	-2.34439e-05	-0.00191695	0.0255019		89.9833	89.9833		9.56626	-0.00155458	-1.03528	2.67458
402	2022-03-31 13:07:39	5425680	7.43454e-09	-1.04315e-10	9.41967e-09	-7.08961e-11	5.48249e-10	4.81758e-09	-2.0863e-13	9.37257e-09	-7.08252e-11	1.90242e-10	0.514009	-2.22596e-05	-0.00755665	0.0202978		90.1833	90.1833		9.69897	-0.00155915	-1.03623	2.67916
403	2022-03-31 13:07:51	5437513	4.90504e-09	-1.02032e-10	9.41967e-09	-8.75156e-11	4.75364e-10	3.17847e-09	-2.04064e-13	9.37257e-09	-8.74281e-11	1.64951e-10	0.339124	-2.17725e-05	-0.00932808	0.0175994		90.3833	90.3833		9.78429	-0.00156355	-1.03792	2.68295
404	2022-03-31 13:08:03	5449347	3.41024e-09	-1.14349e-10	9.41967e-09	-9.52771e-11	4.22996e-10	2.20984e-09	-2.28698e-13	9.37257e-09	-9.51818e-11	1.4678e-10	0.235777	-2.44008e-05	-0.0101554	0.0156605		90.5833	90.5833		9.84178	-0.00156817	-1.03987	2.68627
405	2022-03-31 13:08:15	5461180	2.37783e-09	-1.0925e-10	9.41967e-09	-1.06166e-10	3.90761e-10	1.54083e-09	-2.185e-13	9.37257e-09	-1.0606e-10	1.35594e-10	0.164398	-2.33127e-05	-0.011316	0.0144671		90.7833	90.7833		9.8818	-0.00157294	-1.04202	2.68929
406	2022-03-31 13:08:27	5473013	1.76028e-09	-1.1398e-10	9.41967e-09	-1.09542e-10	3.64363e-10	1.14066e-09	-2.2796e-13	9.37257e-09	-1.09432e-10	1.26434e-10	0.121702	-2.4322e-05	-0.0116758	0.0134898		90.9833	90.9833		9.91041	-0.0015777	-1.04431	2.69208
407	2022-03-31 13:08:38	5484847	1.26392e-09	-1.15485e-10	9.41967e-09	-1.18647e-10	3.39131e-10	8.1902e-10	-2.3097e-13	9.37257e-09	-1.18528e-10	1.17678e-10	0.0873848	-2.46432e-05	-0.0126463	0.0125556		91.1667	91.1667		9.92957	-0.00158219	-1.04654	2.69447
408	2022-03-31 13:08:50	5496680	9.0604e-10	-1.14277e-10	9.41967e-09	-1.24936e-10	3.11864e-10	5.87114e-10	-2.28554e-13	9.37257e-09	-1.24811e-10	1.08217e-10	0.0626417	-2.43854e-05	-0.0133166	0.0115461		91.3667	91.3667		9.94457	-0.0015871	-1.04914	2.69688
409	2022-03-31 13:09:03	5509553	6.08395e-10	-1.19959e-10	9.41967e-09	-1.26269e-10	2.95271e-10	3.9424e-10	-2.39918e-13	9.37257e-09	-1.26143e-10	1.02459e-10	0.0420632	-2.55979e-05	-0.0134587	0.0109318		91.5833	91.5833		9.95592	-0.00159251	-1.05204	2.69931
410	2022-03-31 13:09:17	5523597	3.96599e-10	-1.13202e-10	9.41967e-09	-1.33149e-10	2.75161e-10	2.56996e-10	-2.26404e-13	9.37257e-09	-1.33016e-10	9.54809e-11	0.02742	-2.4156e-05	-0.014192	0.0101873		91.8167	91.8167		9.96402	-0.00159832	-1.05527	2.70178
411	2022-03-31 13:09:31	5537640	2.59558e-10	-1.10816e-10	9.41967e-09	-1.28591e-10	3.59679e-10	1.68194e-10	-2.21632e-13	9.37257e-09	-1.28462e-10	1.24809e-10	0.0179453	-2.36469e-05	-0.0137062	0.0133164		92.05	92.05		9.96932	-0.00160389	-1.05852	2.70452
412	2022-03-31 13:09:45	5551683	1.32955e-10	-1.11308e-10	9.41967e-09	-1.28397e-10	5.20161e-10	8.61548e-11	-2.22616e-13	9.37257e-09	-1.28269e-10	1.80496e-10	0.00919223	-2.37519e-05	-0.0136855	0.0192579		92.2833	92.2833		9.97248	-0.00160942	-1.06172	2.70832
413	2022-03-31 13:09:59	5565727	3.68724e-11	-1.09475e-10	9.41967e-09	-1.37341e-10	6.11459e-10	2.38933e-11	-2.1895e-13	9.37257e-09	-1.37204e-10	2.12176e-10	0.00254928	-2.33607e-05	-0.0146388	0.022638		92.5167	92.5167		9.97385	-0.00161492	-1.06502	2.71321
414	2022-03-31 13:10:13	5579770	-2.23707e-11	-1.08595e-10	9.41967e-09	-1.26925e-10	6.44722e-10	-1.44962e-11	-2.1719e-13	9.37257e-09	-1.26798e-10	2.23719e-10	-0.00154666	-2.31729e-05	-0.0135286	0.0238695		92.75	92.75		9.97397	-0.00162035	-1.06831	2.71863
415	2022-03-31 13:10:27	5593813	-4.76976e-11	-1.08646e-10	9.41967e-09	-1.31536e-10	6.46196e-10	-3.0908e-11	-2.17292e-13	9.37257e-09	-1.31404e-10	2.2423e-10	-0.00329771	-2.31838e-05	-0.0140201	0.0239241		92.9833	92.9833		9.9734	-0.00162576	-1.07152	2.72421
416	2022-03-31 13:10:41	5607857	-7.33041e-11	-1.13868e-10	9.41967e-09	-1.44297e-10	6.35385e-10	-4.75011e-11	-2.27736e-13	9.37257e-09	-1.44153e-10	2.20479e-10	-0.00506809	-2.42981e-05	-0.0153803	0.0235238		93.2167	93.2167		9.97243	-0.0016313	-1.07495	2.72975
417	2022-03-31 13:10:55	5621900	-9.42236e-11	-1.05319e-10	9.41967e-09	-1.38524e-10	6.13025e-10	-6.10569e-11	-2.10638e-13	9.37257e-09	-1.38385e-10	2.1272e-10	-0.00651442	-2.24739e-05	-0.0147649	0.022696		93.45	93.45		9.97108	-0.00163675	-1.07847	2.73514
418	2022-03-31 13:11:09	5635943	-9.28906e-11	-1.07417e-10	9.41967e-09	-1.46232e-10	5.92569e-10	-6.01931e-11	-2.14834e-13	9.37257e-09	-1.46086e-10	2.05621e-10	-0.00642226	-2.29216e-05	-0.0155865	0.0219386		93.6833	93.6833		9.96957	-0.00164205	-1.08201	2.74035
419	2022-03-31 13:11:23	5649987	-1.05027e-10	-1.03813e-10	9.41967e-09	-1.46468e-10	5.67192e-10	-6.80575e-11	-2.07626e-13	9.37257e-09	-1.46322e-10	1.96816e-10	-0.00726135	-2.21525e-05	-0.0156117	0.0209991		93.9167	93.9167		9.96797	-0.00164731	-1.08565	2.74535
420	2022-03-31 13:11:38	5664030	-1.00329e-10	-1.11605e-10	9.41967e-09	-1.41534e-10	5.45208e-10	-6.50132e-11	-2.2321e-13	9.37257e-09	-1.41392e-10	1.89187e-10	-0.00693654	-2.38152e-05	-0.0150858	0.0201852		94.1667	94.1667		9.9662	-0.00165305	-1.08949	2.7505
421	2022-03-31 13:11:52	5678073	-1.04124e-10	-9.85514e-11	8.53717e-09	-1.44049e-10	5.20022e-10	-6.74724e-11	-1.97103e-13	8.49448e-09	-1.43905e-10	1.80448e-10	-0.00794308	-2.32036e-05	-0.016941	0.0212429		94.4	94.4		9.96446	-0.00165854	-1.09322	2.75534
422	2022-03-31 13:12:06	5692117	-1.1625e-10	-1.101e-10	7.64254e-09	-1.52821e-10	4.96011e-10	-7.533e-11	-2.202e-13	7.60433e-09	-1.52668e-10	1.72116e-10	-0.0099062	-2.89572e-05	-0.0200765	0.0226339		94.6333	94.6333		9.96238	-0.00166462	-1.09754	2.76046
423	2022-03-31 13:12:20	5706160	-1.15325e-10	-1.05339e-10	7.07766e-09	-1.46146e-10	4.79472e-10	-7.47306e-11	-2.10678e-13	7.04227e-09	-1.46e-10	1.66377e-10	-0.0106117	-2.99162e-05	-0.0207319	0.0236254		94.8667	94.8667		9.95998	-0.00167149	-1.1023	2.76585
424	2022-03-31 13:12:34	5720203	-1.14154e-10	-1.05923e-10	6.72192e-09	-1.47629e-10	4.62157e-10	-7.39718e-11	-2.11846e-13	6.68831e-09	-1.47481e-10	1.60368e-10	-0.0110599	-3.16741e-05	-0.0220506	0.0239774		95.1	95.1		9.95746	-0.00167868	-1.10729	2.77141
425	2022-03-31 13:12:48	5734247	-1.088e-10	-9.9739e-11	6.51894e-09	-1.44254e-10	4.48381e-10	-7.05024e-11	-1.99478e-13	6.48635e-09	-1.4411e-10	1.55588e-10	-0.0108694	-3.07535e-05	-0.0222174	0.023987		95.3333	95.3333		9.9549	-0.00168596	-1.11246	2.777
426	2022-03-31 13:13:02	5748290	-1.12638e-10	-1.1351e-10	6.36332e-09	-1.49639e-10	4.23365e-10	-7.29894e-11	-2.2702e-13	6.3315e-09	-1.49489e-10	1.46908e-10	-0.011528	-3.58556e-05	-0.0236104	0.0232026		95.5667	95.5667		9.95228	-0.00169373	-1.11781	2.78251
427	2022-03-31 13:13:16	5762333	-1.14734e-10	-1.08072e-10	6.26103e-09	-1.47575e-10	4.20109e-10	-7.43476e-11	-2.16144e-13	6.22972e-09	-1.47427e-10	1.45778e-10	-0.0119343	-3.46956e-05	-0.0236652	0.0234004		95.8	95.8		9.94955	-0.00170196	-1.12332	2.78794
428	2022-03-31 13:13:30	5776377	-1.08058e-10	-1.05186e-10	6.18788e-09	-1.48242e-10	4.05451e-10	-7.00216e-11	-2.10372e-13	6.15694e-09	-1.48094e-10	1.40691e-10	-0.0113728	-3.41683e-05	-0.0240531	0.0228509		96.0333	96.0333		9.94683	-0.00171	-1.12889	2.79334
429	2022-03-31 13:13:44	5790420	-1.24549e-10	-9.4139e-11	6.10392e-09	-1.45898e-10	4.01435e-10	-8.07078e-11	-1.88278e-13	6.0734e-09	-1.45752e-10	1.39298e-10	-0.0132887	-3.10004e-05	-0.0239984	0.0229357		96.2667	96.2667		9.94395	-0.0017176	-1.13449	2.79868
430	2022-03-31 13:13:58	5804463	-1.19249e-10	-1.07653e-10	6.08387e-09	-1.4635e-10	3.83605e-10	-7.72734e-11	-2.15306e-13	6.05345e-09	-1.46204e-10	1.33111e-10	-0.0127652	-3.55675e-05	-0.0241521	0.0219893		96.5	96.5		9.94091	-0.00172537	-1.14011	2.80392
431	2022-03-31 13:14:12	5818507	-1.14014e-10	-1.09537e-10	6.01867e-09	-1.53509e-10	3.88312e-10	-7.38811e-11	-2.19074e-13	5.98858e-09	-1.53355e-10	1.34744e-10	-0.012337	-3.6582e-05	-0.025608	0.0225002		96.7333	96.7333		9.93798	-0.00173378	-1.14592	2.80911
432	2022-03-31 13:14:26	5832550	-1.16605e-10	-1.03886e-10	6.01613e-09	-1.41996e-10	3.73561e-10	-7.556e-11	-2.07772e-13	5.98605e-09	-1.41854e-10	1.29626e-10	-0.0126227	-3.47094e-05	-0.0236974	0.0216546		96.9667	96.9667		9.93507	-0.0017421	-1.15167	2.81426
433	2022-03-31 13:14:40	5846593	-1.22958e-10	-9.91962e-11	5.98641e-09	-1.47489e-10	3.58212e-10	-7.96768e-11	-1.98392e-13	5.95648e-09	-1.47342e-10	1.243e-10	-0.0133765	-3.3307e-05	-0.0247363	0.020868		97.2	97.2		9.93204	-0.00175004	-1.15732	2.81923
434	2022-03-31 13:14:54	5860637	-1.14304e-10	-1.13253e-10	5.96086e-09	-1.41609e-10	3.53927e-10	-7.4069e-11	-2.26506e-13	5.93106e-09	-1.41467e-10	1.22813e-10	-0.0124883	-3.81898e-05	-0.023852	0.0207067		97.4333	97.4333		9.92902	-0.00175838	-1.16299	2.82408
435	2022-03-31 13:15:08	5874680	-1.28107e-10	-1.17318e-10	5.91836e-09	-1.51822e-10	3.48437e-10	-8.30133e-11	-2.34636e-13	5.88877e-09	-1.5167e-10	1.20908e-10	-0.0140969	-3.98447e-05	-0.0257558	0.0205319		97.6667	97.6667		9.92592	-0.00176748	-1.16878	2.82889
436	2022-03-31 13:15:22	5888723	-1.2843e-10	-1.10151e-10	5.89683e-09	-1.53208e-10	3.44022e-10	-8.32226e-11	-2.20302e-13	5.86735e-09	-1.53055e-10	1.19376e-10	-0.014184	-3.75471e-05	-0.0260859	0.0203458		97.9	97.9		9.92262	-0.00177651	-1.17482	2.83366
437	2022-03-31 13:15:36	5902767	-1.26258e-10	-1.1785e-10	5.91378e-09	-1.48231e-10	3.41964e-10	-8.18152e-11	-2.357e-13	5.88421e-09	-1.48083e-10	1.18662e-10	-0.0139042	-4.00563e-05	-0.0251661	0.0201661		98.1333	98.1333		9.91934	-0.00178557	-1.1808	2.83838
438	2022-03-31 13:15:50	5916810	-1.30795e-10	-1.08544e-10	5.87713e-09	-1.56777e-10	3.30101e-10	-8.47552e-11	-2.17088e-13	5.84774e-09	-1.5662e-10	1.14545e-10	-0.0144937	-3.71234e-05	-0.026783	0.0195879		98.3667	98.3667		9.91603	-0.00179457	-1.18687	2.84302
439	2022-03-31 13:16:04	5930853	-1.22775e-10	-1.07725e-10	5.87562e-09	-1.4893e-10	3.34056e-10	-7.95582e-11	-2.1545e-13	5.84624e-09	-1.48781e-10	1.15917e-10	-0.0136084	-3.68527e-05	-0.025449	0.0198277		98.6	98.6		9.91275	-0.0018032	-1.19296	2.84762
440	2022-03-31 13:16:18	5944896	-1.30128e-10	-1.0799e-10	5.84823e-09	-1.53058e-10	3.24734e-10	-8.43229e-11	-2.1598e-13	5.81899e-09	-1.52905e-10	1.12683e-10	-0.014491	-3.71164e-05	-0.0262769	0.0193647		98.8333	98.8333		9.90947	-0.00181183	-1.19899	2.85219
441	2022-03-31 13:16:32	5958940	-1.32364e-10	-1.10622e-10	5.85872e-09	-1.53757e-10	3.2673e-10	-8.57719e-11	-2.21244e-13	5.82943e-09	-1.53603e-10	1.13375e-10	-0.0147136	-3.7953e-05	-0.0263496	0.0194488		99.0667	99.0667		9.90607	-0.00182059	-1.20513	2.85672
442	2022-03-31 13:16:46	5972983	-1.25549e-10	-1.12322e-10	5.87606e-09	-1.55541e-10	3.12832e-10	-8.13558e-11	-2.24644e-13	5.84668e-09	-1.55385e-10	1.08553e-10	-0.0139149	-3.84225e-05	-0.0265767	0.0185666		99.3	99.3		9.90273	-0.0018295	-1.21131	2.86116
443	2022-03-31 13:17:01	5987027	-1.27419e-10	-1.02862e-10	5.84314e-09	-1.48446e-10	3.16049e-10	-8.25675e-11	-2.05724e-13	5.81392e-09	-1.48298e-10	1.09669e-10	-0.0142017	-3.53847e-05	-0.0255073	0.0188632		99.55	99.55		9.89921	-0.00183872	-1.21782	2.86583
444	2022-03-31 13:17:15	6001070	-1.1711e-10	-1.02565e-10	5.82203e-09	-1.44834e-10	3.11127e-10	-7.58873e-11	-2.0513e-13	5.79292e-09	-1.44689e-10	1.07961e-10	-0.0131	-3.54105e-05	-0.0249769	0.0186367		99.7833	99.7833		9.89603	-0.00184698	-1.22371	2.87021
445	2022-03-31 13:17:29	6015113	-1.12133e-10	-1.10479e-10	5.82947e-09	-1.50983e-10	3.10467e-10	-7.26622e-11	-2.20958e-13	5.80032e-09	-1.50832e-10	1.07732e-10	-0.0125273	-3.80941e-05	-0.0260041	0.0185735		100.017	100.017		9.89304	-0.00185556	-1.22966	2.87455
446	2022-03-31 13:17:43	6029157	-1.24237e-10	-1.07346e-10	5.81562e-09	-1.49338e-10	3.05506e-10	-8.05056e-11	-2.14692e-13	5.78654e-09	-1.49189e-10	1.06011e-10	-0.0139126	-3.7102e-05	-0.025782	0.0183202		100.25	100.25		9.88995	-0.00186433	-1.2357	2.87885
447	2022-03-31 13:17:57	6043200	-1.2414e-10	-1.16253e-10	5.80494e-09	-1.53004e-10	2.96339e-10	-8.04427e-11	-2.32506e-13	5.77592e-09	-1.52851e-10	1.0283e-10	-0.0139273	-4.02544e-05	-0.0264635	0.0178032		100.483	100.483		9.8867	-0.00187336	-1.24179	2.88307
448	2022-03-31 13:18:11	6057243	-1.25989e-10	-1.15465e-10	5.79379e-09	-1.53187e-10	3.03471e-10	-8.16409e-11	-2.3093e-13	5.76482e-09	-1.53034e-10	1.05304e-10	-0.0141619	-4.00585e-05	-0.0265462	0.0182667		100.717	100.717		9.88343	-0.00188273	-1.24798	2.88728
449	2022-03-31 13:18:25	6071287	-1.14895e-10	-1.03957e-10	5.81235e-09	-1.46511e-10	3.00369e-10	-7.4452e-11	-2.07914e-13	5.78329e-09	-1.46364e-10	1.04228e-10	-0.0128736	-3.59508e-05	-0.0253082	0.0180223		100.95	100.95		9.88027	-0.00189159	-1.25403	2.89151
450	2022-03-31 13:18:39	6085330	-1.23345e-10	-1.09404e-10	5.774e-09	-1.47371e-10	2.96676e-10	-7.99276e-11	-2.18808e-13	5.74513e-09	-1.47224e-10	1.02947e-10	-0.0139122	-3.80858e-05	-0.0256258	0.0179189		101.183	101.183		9.87715	-0.00190023	-1.25997	2.8957
451	2022-03-31 13:18:53	6099373	-1.24248e-10	-9.90629e-11	5.74671e-09	-1.51445e-10	2.84981e-10	-8.05127e-11	-1.98126e-13	5.71798e-09	-1.51294e-10	9.88884e-11	-0.0140806	-3.46496e-05	-0.0264593	0.0172943		101.417	101.417		9.87388	-0.00190872	-1.26605	2.89981
452	2022-03-31 13:19:07	6113417	-1.2127e-10	-1.1525e-10	5.76248e-09	-1.39771e-10	2.85734e-10	-7.8583e-11	-2.305e-13	5.73367e-09	-1.39631e-10	9.91497e-11	-0.0137055	-4.02011e-05	-0.0243529	0.0172925		101.65	101.65		9.87064	-0.00191745	-1.27197	2.90385
453	2022-03-31 13:19:21	6127460	-1.32117e-10	-1.07417e-10	5.78037e-09	-1.58508e-10	2.82348e-10	-8.56118e-11	-2.14834e-13	5.75147e-09	-1.58349e-10	9.79748e-11	-0.0148852	-3.73529e-05	-0.027532	0.0170347		101.883	101.883		9.8673	-0.0019265	-1.27803	2.90785
454	2022-03-31 13:19:35	6141503	-1.27752e-10	-1.07848e-10	5.76828e-09	-1.5639e-10	2.72289e-10	-8.27833e-11	-2.15696e-13	5.73944e-09	-1.56234e-10	9.44843e-11	-0.0144236	-3.75814e-05	-0.0272211	0.0164623		102.117	102.117		9.86388	-0.00193524	-1.28442	2.91176
455	2022-03-31 13:19:49	6155547	-1.37406e-10	-1.05063e-10	5.75323e-09	-1.551e-10	2.82179e-10	-8.90391e-11	-2.10126e-13	5.72446e-09	-1.54945e-10	9.79161e-11	-0.0155541	-3.67067e-05	-0.0270671	0.0171049		102.35	102.35		9.86039	-0.00194391	-1.29075	2.91568
456	2022-03-31 13:20:03	6169590	-1.35052e-10	-1.10857e-10	5.74608e-09	-1.49467e-10	2.7771e-10	-8.75137e-11	-2.21714e-13	5.71735e-09	-1.49318e-10	9.63654e-11	-0.0153067	-3.87792e-05	-0.0261166	0.0168549		102.583	102.583		9.85679	-0.00195271	-1.29695	2.91964
457	2022-03-31 13:20:17	6183633	-1.28634e-10	-1.20594e-10	5.74808e-09	-1.50929e-10	2.7824e-10	-8.33548e-11	-2.41188e-13	5.71934e-09	-1.50778e-10	9.65493e-11	-0.0145742	-4.21706e-05	-0.0263628	0.0168812		102.817	102.817		9.8533	-0.00196216	-1.30308	2.92357
458	2022-03-31 13:20:31	6197676	-1.31816e-10	-1.13355e-10	5.74004e-09	-1.59314e-10	2.70592e-10	-8.54168e-11	-2.2671e-13	5.71134e-09	-1.59155e-10	9.38954e-11	-0.0149556	-3.96947e-05	-0.0278664	0.0164402		103.05	103.05		9.84985	-0.00197171	-1.3094	2.92746
459	2022-03-31 13:20:45	6211720	-1.23474e-10	-1.03804e-10	5.72259e-09	-1.57465e-10	2.704e-10	-8.00112e-11	-2.07608e-13	5.69398e-09	-1.57308e-10	9.38288e-11	-0.0140519	-3.6461e-05	-0.027627	0.0164786		103.283	103.283		9.84647	-0.00198059	-1.31588	2.9313
460	2022-03-31 13:20:59	6225763	-1.4234e-10	-1.08277e-10	5.71369e-09	-1.54477e-10	2.70546e-10	-9.22363e-11	-2.16554e-13	5.68512e-09	-1.54323e-10	9.38795e-11	-0.0162242	-3.80914e-05	-0.027145	0.0165132		103.517	103.517		9.84294	-0.00198929	-1.32227	2.93515
461	2022-03-31 13:21:13	6239806	-1.30805e-10	-1.0625e-10	5.71461e-09	-1.56444e-10	2.64664e-10	-8.47616e-11	-2.125e-13	5.68604e-09	-1.56288e-10	9.18384e-11	-0.014907	-3.73723e-05	-0.0274862	0.0161516		103.75	103.75		9.83931	-0.0019981	-1.32864	2.93896
462	2022-03-31 13:21:27	6253850	-1.39427e-10	-1.1571e-10	5.72149e-09	-1.49747e-10	2.76251e-10	-9.03487e-11	-2.3142e-13	5.69288e-09	-1.49597e-10	9.58591e-11	-0.0158705	-4.06508e-05	-0.0262779	0.0168384		103.983	103.983		9.83572	-0.0020072	-1.33491	2.94281
463	2022-03-31 13:21:41	6267893	-1.29419e-10	-1.08339e-10	5.73728e-09	-1.5295e-10	2.64196e-10	-8.38635e-11	-2.16678e-13	5.70859e-09	-1.52797e-10	9.1676e-11	-0.0146907	-3.79565e-05	-0.0267661	0.0160593		104.217	104.217		9.83215	-0.00201637	-1.3411	2.94665
464	2022-03-31 13:21:55	6281936	-1.26914e-10	-1.07049e-10	5.69448e-09	-1.48822e-10	2.7255e-10	-8.22403e-11	-2.14098e-13	5.66601e-09	-1.48673e-10	9.45748e-11	-0.0145147	-3.77864e-05	-0.0262395	0.0166916		104.45	104.45		9.82874	-0.00202521	-1.34729	2.95047
465	2022-03-31 13:22:09	6295980	-1.27505e-10	-1.00435e-10	5.70465e-09	-1.55208e-10	2.63827e-10	-8.26232e-11	-2.0087e-13	5.67613e-09	-1.55053e-10	9.1548e-11	-0.0145563	-3.53886e-05	-0.0273167	0.0161286		104.683	104.683		9.82535	-0.00203374	-1.35353	2.9543
466	2022-03-31 13:22:24	6310023	-1.28946e-10	-1.05636e-10	6.11488e-09	-1.49693e-10	2.58959e-10	-8.3557e-11	-2.11272e-13	6.08431e-09	-1.49543e-10	8.98588e-11	-0.0137332	-3.47241e-05	-0.0245785	0.0147689		104.933	104.933		9.82182	-0.00204251	-1.36002	2.95816
467	2022-03-31 13:22:38	6324066	-1.28999e-10	-1.02298e-10	5.14849e-09	-1.44297e-10	2.73471e-10	-8.35914e-11	-2.04596e-13	5.12275e-09	-1.44153e-10	9.48944e-11	-0.0163177	-3.99387e-05	-0.0281397	0.0185241		105.167	105.167		9.81831	-0.00205122	-1.36617	2.96205
468	2022-03-31 13:22:52	6338110	-1.23216e-10	-1.17646e-10	5.00282e-09	-1.45565e-10	2.72105e-10	-7.9844e-11	-2.35292e-13	4.97781e-09	-1.45419e-10	9.44204e-11	-0.01604	-4.72682e-05	-0.0292136	0.0189683		105.4	105.4		9.81453	-0.00206139	-1.37286	2.96642
469	2022-03-31 13:23:06	6352153	-1.33375e-10	-1.02309e-10	4.99248e-09	-1.53155e-10	2.77349e-10	-8.6427e-11	-2.04618e-13	4.96752e-09	-1.53002e-10	9.62401e-11	-0.0173984	-4.11912e-05	-0.0308005	0.0193739		105.633	105.633		9.81063	-0.00207171	-1.37986	2.97089
470	2022-03-31 13:23:20	6366196	-1.3316e-10	-1.06772e-10	5.17072e-09	-1.48091e-10	2.73041e-10	-8.62877e-11	-2.13544e-13	5.14487e-09	-1.47943e-10	9.47452e-11	-0.0167716	-4.15062e-05	-0.0287554	0.0184155		105.867	105.867		9.80665	-0.00208136	-1.38681	2.9753
471	2022-03-31 13:23:34	6380239	-1.20131e-10	-9.82133e-11	5.32133e-09	-1.46081e-10	2.70984e-10	-7.78449e-11	-1.96427e-13	5.29472e-09	-1.45935e-10	9.40314e-11	-0.0147024	-3.70986e-05	-0.0275623	0.0177595		106.1	106.1		9.80297	-0.00209053	-1.39338	2.97952
472	2022-03-31 13:23:48	6394283	-1.26043e-10	-1.17082e-10	5.38153e-09	-1.54326e-10	2.59796e-10	-8.16759e-11	-2.34164e-13	5.35462e-09	-1.54172e-10	9.01492e-11	-0.0152533	-4.37312e-05	-0.0287923	0.0168358		106.333	106.333		9.79948	-0.00209996	-1.39996	2.98356
473	2022-03-31 13:24:02	6408326	-1.25645e-10	-1.11861e-10	7.39887e-09	-1.56659e-10	2.90825e-10	-8.1418e-11	-2.23722e-13	7.36188e-09	-1.56502e-10	1.00916e-10	-0.0110594	-3.03893e-05	-0.0212585	0.013708		106.567	106.567		9.79641	-0.00210861	-1.4058	2.98712
474	2022-03-31 13:24:16	6422369	-1.3173e-10	-1.06589e-10	9.41967e-09	-1.44243e-10	2.90188e-10	-8.5361e-11	-2.13178e-13	9.37257e-09	-1.44099e-10	1.00695e-10	-0.00910754	-2.27449e-05	-0.0153745	0.0107436		106.8	106.8		9.79406	-0.00211481	-1.41007	2.98997
475	2022-03-31 13:24:30	6436413	-1.24409e-10	-1.17195e-10	9.41967e-09	-1.2672e-10	2.63789e-10	-8.0617e-11	-2.3439e-13	9.37257e-09	-1.26593e-10	9.15348e-11	-0.00860138	-2.50081e-05	-0.0135068	0.00976624		107.033	107.033		9.79199	-0.00212038	-1.41344	2.99237
476	2022-03-31 13:24:44	6450456	-1.30859e-10	-1.06598e-10	9.41967e-09	-1.35127e-10	2.41229e-10	-8.47966e-11	-2.13196e-13	9.37257e-09	-1.34992e-10	8.37065e-11	-0.00904732	-2.27468e-05	-0.0144029	0.008931		107.267	107.267		9.78993	-0.00212595	-1.4167	2.99455
477	2022-03-31 13:24:58	6464499	-1.39137e-10	-1.07049e-10	9.41967e-09	-1.24882e-10	2.22924e-10	-9.01608e-11	-2.14098e-13	9.37257e-09	-1.24757e-10	7.73546e-11	-0.00961964	-2.2843e-05	-0.0133109	0.0082533		107.5	107.5		9.78775	-0.00213127	-1.41993	2.99655
478	2022-03-31 13:25:12	6478543	-1.25291e-10	-1.21925e-10	9.41967e-09	-1.31375e-10	2.07574e-10	-8.11886e-11	-2.4385e-13	9.37257e-09	-1.31244e-10	7.20282e-11	-0.00866236	-2.60174e-05	-0.0140029	0.007685		107.733	107.733		9.78562	-0.00213697	-1.42312	2.99841
479	2022-03-31 13:25:26	6492586	-1.37589e-10	-1.14308e-10	9.41967e-09	-1.24893e-10	1.93239e-10	-8.91577e-11	-2.28616e-13	9.37257e-09	-1.24768e-10	6.70539e-11	-0.00951262	-2.4392e-05	-0.013312	0.00715427		107.967	107.967		9.7835	-0.00214285	-1.4263	3.00014
480	2022-03-31 13:25:40	6506629	-1.30967e-10	-1.29225e-10	9.41967e-09	-1.27763e-10	1.8685e-10	-8.48666e-11	-2.5845e-13	9.37257e-09	-1.27635e-10	6.48369e-11	-0.00905478	-2.75751e-05	-0.013618	0.00691773		108.2	108.2		9.78133	-0.00214891	-1.42944	3.00179
481	2022-03-31 13:25:54	6520673	-1.40459e-10	-1.17256e-10	9.41967e-09	-1.30773e-10	1.84377e-10	-9.10174e-11	-2.34512e-13	9.37257e-09	-1.30642e-10	6.39788e-11	-0.00971104	-2.50211e-05	-0.0139388	0.00682618		108.433	108.433		9.77915	-0.00215505	-1.43266	3.00339
482	2022-03-31 13:26:08	6534716	6.55856e-11	-1.18976e-10	9.41967e-09	-1.05865e-10	8.39629e-10	4.24995e-11	-2.37952e-13	9.37257e-09	-1.05759e-10	2.91351e-10	0.00453445	-2.53881e-05	-0.0112839	0.0310855		108.667	108.667		9.77854	-0.00216093	-1.4356	3.00781
483	2022-03-31 13:26:22	6548759	4.24438e-09	-1.2471e-10	9.41967e-09	-5.17181e-11	1.77739e-09	2.75036e-09	-2.4942e-13	9.37257e-09	-5.16664e-11	6.16754e-10	0.293448	-2.66117e-05	-0.00551251	0.0658042		108.9	108.9		9.81331	-0.002167	-1.43756	3.01912
484	2022-03-31 13:26:40	6566053	7.56849e-09	-1.0709e-10	9.41967e-09	-1.94574e-11	2.15734e-09	4.90438e-09	-2.1418e-13	9.37257e-09	-1.94379e-11	7.48597e-10	0.52327	-2.28518e-05	-0.00207392	0.079871		109.2	109.2		9.93581	-0.00217442	-1.4387	3.04097
485	2022-03-31 13:26:51	6577887	9.32414e-09	-1.10448e-10	9.41967e-09	-1.09219e-11	2.09053e-09	6.04204e-09	-2.20896e-13	9.37257e-09	-1.0911e-11	7.25414e-10	0.644652	-2.35683e-05	-0.00116414	0.0773975		109.383	109.383		10.0429	-0.00217867	-1.439	3.05538
486	2022-03-31 13:27:03	6589720	1.05521e-08	-1.12618e-10	9.41967e-09	-2.95624e-12	1.88014e-09	6.83776e-09	-2.25236e-13	9.37257e-09	-2.95328e-12	6.52409e-10	0.72955	-2.40314e-05	-0.000315099	0.0696083		109.583	109.583		10.1803	-0.00218343	-1.43914	3.07008
487	2022-03-31 13:27:16	6602593	1.13808e-08	-1.20963e-10	9.41967e-09	-5.91249e-12	1.62964e-09	7.37476e-09	-2.41926e-13	9.37257e-09	-5.90658e-12	5.65485e-10	0.786845	-2.58121e-05	-0.000630198	0.060334		109.8	109.8		10.3446	-0.00218883	-1.43925	3.08416
488	2022-03-31 13:27:27	6613897	1.19419e-08	-1.07387e-10	9.41967e-09	-7.37448e-12	1.39511e-09	7.73835e-09	-2.14774e-13	9.37257e-09	-7.36711e-12	4.84103e-10	0.825638	-2.29152e-05	-0.000786028	0.0516511		109.983	109.983		10.4924	-0.0021933	-1.43938	3.09443
489	2022-03-31 13:27:39	6625200	1.22704e-08	-1.09128e-10	9.41967e-09	-1.25774e-11	1.22157e-09	7.95122e-09	-2.18256e-13	9.37257e-09	-1.25648e-11	4.23885e-10	0.84835	-2.32867e-05	-0.00134059	0.0452261		110.183	110.183		10.6598	-0.00219792	-1.43959	3.10411
490	2022-03-31 13:27:50	6636503	1.24619e-08	-1.10643e-10	9.41967e-09	-1.18464e-11	1.05456e-09	8.07531e-09	-2.21286e-13	9.37257e-09	-1.18346e-11	3.65932e-10	0.86159	-2.361e-05	-0.00126268	0.0390429		110.367	110.367		10.8165	-0.00220222	-1.43983	3.11184
491	2022-03-31 13:28:01	6647807	1.26037e-08	-1.14502e-10	9.41967e-09	-1.86942e-11	9.37057e-10	8.1672e-09	-2.29004e-13	9.37257e-09	-1.86755e-11	3.25159e-10	0.871393	-2.44334e-05	-0.00199257	0.0346926		110.55	110.55		10.9754	-0.00220662	-1.44013	3.1186
492	2022-03-31 13:28:13	6659110	1.27387e-08	-1.09639e-10	9.41967e-09	-1.23409e-11	8.37029e-10	8.25468e-09	-2.19278e-13	9.37257e-09	-1.23286e-11	2.90449e-10	0.880727	-2.33957e-05	-0.00131539	0.0309893		110.75	110.75		11.1506	-0.0022114	-1.44046	3.12517
493	2022-03-31 13:28:24	6670413	1.22832e-08	-1.1397e-10	9.41967e-09	-1.70602e-11	7.6355e-10	7.95951e-09	-2.2794e-13	9.37257e-09	-1.70431e-11	2.64952e-10	0.849235	-2.43199e-05	-0.00181841	0.0282689		110.933	110.933		11.3092	-0.00221578	-1.44074	3.1306
494	2022-03-31 13:28:35	6681717	9.456e-09	-1.03373e-10	9.41967e-09	-6.19199e-11	5.6442e-10	6.12749e-09	-2.06746e-13	9.37257e-09	-6.1858e-11	1.95854e-10	0.653768	-2.20586e-05	-0.00659989	0.0208965		111.117	111.117		11.4469	-0.00222003	-1.44152	3.1351
495	2022-03-31 13:28:47	6693530	5.54168e-09	-1.11288e-10	9.41967e-09	-8.36348e-11	4.90736e-10	3.59101e-09	-2.22576e-13	9.37257e-09	-8.35512e-11	1.70285e-10	0.38314	-2.37476e-05	-0.00891443	0.0181685		111.317	111.317		11.5506	-0.00222461	-1.44307	3.13901
496	2022-03-31 13:28:59	6705363	3.82301e-09	-1.10387e-10	9.41967e-09	-1.01619e-10	4.38391e-10	2.47731e-09	-2.20774e-13	9.37257e-09	-1.01517e-10	1.52122e-10	0.264315	-2.35553e-05	-0.0108313	0.0162305		111.517	111.517		11.6154	-0.00222934	-1.44504	3.14245
497	2022-03-31 13:29:11	6717197	2.68653e-09	-1.12424e-10	9.41967e-09	-1.00125e-10	3.93111e-10	1.74087e-09	-2.24848e-13	9.37257e-09	-1.00025e-10	1.3641e-10	0.185741	-2.399e-05	-0.0106721	0.0145541		111.717	111.717		11.6604	-0.0022341	-1.44719	3.14553
498	2022-03-31 13:29:23	6729030	1.93485e-09	-1.15741e-10	9.41967e-09	-1.19991e-10	3.63718e-10	1.25378e-09	-2.31482e-13	9.37257e-09	-1.19871e-10	1.2621e-10	0.133771	-2.46978e-05	-0.0127896	0.0134659		111.917	111.917		11.6923	-0.00223896	-1.44954	3.14833
499	2022-03-31 13:29:34	6740863	1.41345e-09	-1.18629e-10	9.41967e-09	-1.13186e-10	3.34132e-10	9.15916e-10	-2.37258e-13	9.37257e-09	-1.13073e-10	1.15944e-10	0.097723	-2.53141e-05	-0.0120642	0.0123705		112.1	112.1		11.7136	-0.00224355	-1.45182	3.1507
500	2022-03-31 13:29:46	6752697	1.01703e-09	-1.17799e-10	9.41967e-09	-1.21808e-10	3.13746e-10	6.59035e-10	-2.35598e-13	9.37257e-09	-1.21686e-10	1.0887e-10	0.0703153	-2.5137e-05	-0.0129832	0.0116158		112.3	112.3		11.7304	-0.00224859	-1.45432	3.1531
501	2022-03-31 13:29:59	6765571	6.74862e-10	-1.2e-10	9.41967e-09	-1.27978e-10	2.87715e-10	4.37311e-10	-2.4e-13	9.37257e-09	-1.2785e-10	9.98371e-11	0.0466585	-2.56066e-05	-0.0136409	0.0106521		112.517	112.517		11.743	-0.00225409	-1.45721	3.15551
502	2022-03-31 13:30:13	6779614	4.29891e-10	-1.18761e-10	9.41967e-09	-1.31601e-10	2.66968e-10	2.78569e-10	-2.37522e-13	9.37257e-09	-1.31469e-10	9.26379e-11	0.0297218	-2.53422e-05	-0.014027	0.00988394		112.75	112.75		11.7519	-0.00226003	-1.46043	3.15791
503	2022-03-31 13:30:27	6793657	2.88981e-10	-1.1955e-10	9.41967e-09	-1.29161e-10	3.03618e-10	1.8726e-10	-2.391e-13	9.37257e-09	-1.29032e-10	1.05355e-10	0.0199795	-2.55106e-05	-0.013767	0.0112408		112.983	112.983		11.7577	-0.00226597	-1.46368	3.16037
504	2022-03-31 13:30:41	6807701	1.58368e-10	-1.17799e-10	9.41967e-09	-1.45791e-10	4.64768e-10	1.02622e-10	-2.35598e-13	9.37257e-09	-1.45645e-10	1.61274e-10	0.0109492	-2.5137e-05	-0.0155395	0.0172071		113.217	113.217		11.7614	-0.00227188	-1.4671	3.16369
505	2022-03-31 13:30:55	6821744	3.80119e-11	-1.2515e-10	9.41967e-09	-1.4549e-10	5.74294e-10	2.46317e-11	-2.503e-13	9.37257e-09	-1.45345e-10	1.9928e-10	0.00262806	-2.67056e-05	-0.0155074	0.021262		113.45	113.45		11.7629	-0.00227792	-1.47072	3.16818
506	2022-03-31 13:31:09	6835787	-1.28892e-11	-1.25099e-10	9.41967e-09	-1.46479e-10	6.15943e-10	-8.3522e-12	-2.50198e-13	9.37257e-09	-1.46333e-10	2.13732e-10	-0.000891132	-2.66947e-05	-0.0156128	0.022804		113.683	113.683		11.7631	-0.00228415	-1.47435	3.17332
507	2022-03-31 13:31:23	6849831	-4.84609e-11	-1.18362e-10	9.41967e-09	-1.49134e-10	6.34156e-10	-3.14027e-11	-2.36724e-13	9.37257e-09	-1.48985e-10	2.20052e-10	-0.00335049	-2.52571e-05	-0.0158958	0.0234783		113.917	113.917		11.7626	-0.00229022	-1.47802	3.17872
508	2022-03-31 13:31:37	6863874	-7.55078e-11	-1.1225e-10	9.41967e-09	-1.50628e-10	6.25518e-10	-4.89291e-11	-2.245e-13	9.37257e-09	-1.50477e-10	2.17055e-10	-0.00522045	-2.39529e-05	-0.0160551	0.0231585		114.15	114.15		11.7616	-0.00229596	-1.48175	3.18416
509	2022-03-31 13:31:51	6877917	-9.42128e-11	-1.19847e-10	9.41967e-09	-1.53434e-10	6.05907e-10	-6.10499e-11	-2.39694e-13	9.37257e-09	-1.53281e-10	2.1025e-10	-0.00651368	-2.5574e-05	-0.0163542	0.0224324		114.383	114.383		11.7603	-0.00230173	-1.48553	3.18948
510	2022-03-31 13:32:05	6891961	-1.01952e-10	-1.15403e-10	9.41967e-09	-1.57928e-10	5.77742e-10	-6.60649e-11	-2.30806e-13	9.37257e-09	-1.5777e-10	2.00476e-10	-0.00704875	-2.46257e-05	-0.0168332	0.0213897		114.617	114.617		11.7587	-0.00230759	-1.48941	3.19459
[truncated: 403 more rows]

## Sheet: Sheet4
					Et integral		CO intergral		EO integral		CO2 integral
[truncated: 11 more rows]
