# Supplementary material for: Mechano-synthesis of a AgSrFeO3 catalyst for epoxidation of ethylene in a chemical looping set-up
Source: Royal Society of Chemistry journal article supplement (doi:10.1039/d4ma00485j), 2024-01-01
Supplement: d4ma00485j7.xlsx [file d4ma00485j7.xlsx]

## Sheet: RAW DATA
Real time	ms	Ethylene mbar	Carbon monoxide mbar	Argon mbar	Ethylene oxide mbar	Carbon dioxide mbar	Corrected Et	Corrected CO	Corrected Ar	Corrected EtO
2022-04-01 11:32:11	1551	-5.83509e-11	1.35142e-11	7.58375e-09	-9.43633e-11	4.36564e-10	-3.78114e-11	2.70284e-14	7.54583e-09	-9.42689e-11
2022-04-01 11:32:36	26321	-5.78994e-11	-2.41311e-11	7.76963e-09	-9.60188e-11	3.90086e-10	-3.75188e-11	-4.82622e-14	7.73078e-09	-9.59228e-11
2022-04-01 11:32:49	39834	-5.88239e-11	-2.88509e-11	8.62567e-09	-9.93513e-11	3.77685e-10	-3.81179e-11	-5.77018e-14	8.58254e-09	-9.92519e-11
2022-04-01 11:33:03	53348	-6.45644e-11	-2.60866e-11	6.75338e-09	-9.41161e-11	3.53597e-10	-4.18377e-11	-5.21732e-14	6.71961e-09	-9.4022e-11
2022-04-01 11:33:17	67901	-5.21696e-11	-1.51932e-11	6.4818e-09	-8.15493e-11	3.52983e-10	-3.38059e-11	-3.03864e-14	6.44939e-09	-8.14678e-11
2022-04-01 11:33:31	81945	-5.38359e-11	-3.24751e-11	6.39582e-09	-8.45271e-11	3.42118e-10	-3.48857e-11	-6.49502e-14	6.36384e-09	-8.44426e-11
2022-04-01 11:33:45	95988	-5.58139e-11	-3.53418e-11	6.51807e-09	-9.36968e-11	3.36144e-10	-3.61674e-11	-7.06836e-14	6.48548e-09	-9.36031e-11
2022-04-01 11:34:00	110031	-5.36531e-11	-2.92502e-11	6.56941e-09	-8.68276e-11	3.22753e-10	-3.47672e-11	-5.85004e-14	6.53656e-09	-8.67408e-11
2022-04-01 11:34:14	124075	-6.34894e-11	-3.68775e-11	6.55623e-09	-9.25143e-11	3.25217e-10	-4.11411e-11	-7.3755e-14	6.52345e-09	-9.24218e-11
2022-04-01 11:34:28	138118	-7.41211e-11	-3.51166e-11	1.1321e-08	-8.67523e-11	3.87329e-10	-4.80305e-11	-7.02332e-14	1.12644e-08	-8.66655e-11
2022-04-01 11:34:42	152671	-4.23656e-11	-3.6171e-11	9.82725e-08	-7.85823e-11	4.15171e-10	-2.74529e-11	-7.2342e-14	9.77811e-08	-7.85037e-11
2022-04-01 11:34:56	166445	-4.51391e-11	-4.07475e-11	2.44741e-07	-7.06811e-11	3.55432e-10	-2.92501e-11	-8.1495e-14	2.43517e-07	-7.06104e-11
2022-04-01 11:35:09	179708	-6.50266e-11	-4.5969e-11	3.19633e-07	-8.53978e-11	3.06512e-10	-4.21372e-11	-9.1938e-14	3.18035e-07	-8.53124e-11
2022-04-01 11:35:22	192971	-7.60561e-11	-4.80472e-11	3.78937e-07	-7.88081e-11	2.78117e-10	-4.92844e-11	-9.60944e-14	3.77042e-07	-7.87293e-11
2022-04-01 11:35:36	206235	-6.61876e-11	-5.2767e-11	4.10112e-07	-8.07753e-11	2.55649e-10	-4.28896e-11	-1.05534e-13	4.08061e-07	-8.06945e-11
2022-04-01 11:35:49	219498	-6.29304e-11	-4.08601e-11	4.28834e-07	-8.15171e-11	2.34733e-10	-4.07789e-11	-8.17202e-14	4.2669e-07	-8.14356e-11
2022-04-01 11:36:02	232761	-7.74643e-11	-5.40366e-11	4.38599e-07	-8.03776e-11	2.13218e-10	-5.01969e-11	-1.08073e-13	4.36406e-07	-8.02972e-11
2022-04-01 11:36:16	246025	-7.41103e-11	-5.47634e-11	4.28118e-07	-8.37853e-11	2.05079e-10	-4.80235e-11	-1.09527e-13	4.25977e-07	-8.37015e-11
2022-04-01 11:36:29	259288	-5.70286e-11	-5.09753e-11	4.26147e-07	-7.13798e-11	1.05639e-09	-3.69545e-11	-1.01951e-13	4.24016e-07	-7.13084e-11
2022-04-01 11:36:42	272551	2.73965e-09	-4.09728e-11	4.22922e-07	-1.40932e-11	4.79027e-09	1.77529e-09	-8.19456e-14	4.20807e-07	-1.40791e-11
2022-04-01 11:37:00	290106	6.84924e-09	-4.32763e-11	3.96137e-07	4.61389e-11	6.58894e-09	4.43831e-09	-8.65526e-14	3.94156e-07	4.60928e-11
2022-04-01 11:37:08	298949	8.4267e-09	-3.24137e-11	4.04109e-07	7.11218e-11	7.40921e-09	5.4605e-09	-6.48274e-14	4.02088e-07	7.10507e-11
2022-04-01 11:37:17	307792	9.58119e-09	-3.47991e-11	4.09305e-07	8.93108e-11	7.6785e-09	6.20861e-09	-6.95982e-14	4.07258e-07	8.92215e-11
2022-04-01 11:37:27	317676	1.07371e-08	-2.72332e-11	4.13695e-07	1.17572e-10	7.55829e-09	6.95764e-09	-5.44664e-14	4.11627e-07	1.17454e-10
2022-04-01 11:37:35	325989	1.15178e-08	-2.65166e-11	4.17278e-07	1.27462e-10	7.16607e-09	7.46353e-09	-5.30332e-14	4.15192e-07	1.27335e-10
2022-04-01 11:37:44	334302	1.23106e-08	-1.93704e-11	4.18353e-07	1.23388e-10	6.6285e-09	7.97727e-09	-3.87408e-14	4.16261e-07	1.23265e-10
2022-04-01 11:37:52	342615	1.28072e-08	-2.40594e-11	4.17995e-07	1.47027e-10	6.02751e-09	8.29907e-09	-4.81188e-14	4.15905e-07	1.4688e-10
2022-04-01 11:38:00	350928	1.33796e-08	-3.08166e-11	4.17368e-07	1.33987e-10	5.45591e-09	8.66998e-09	-6.16332e-14	4.15281e-07	1.33853e-10
2022-04-01 11:38:09	359241	1.37169e-08	-2.13156e-11	4.16741e-07	1.29558e-10	4.90029e-09	8.88855e-09	-4.26312e-14	4.14657e-07	1.29428e-10
2022-04-01 11:38:17	367555	1.40817e-08	-2.3353e-11	4.16113e-07	1.34944e-10	4.43599e-09	9.12494e-09	-4.6706e-14	4.14032e-07	1.34809e-10
2022-04-01 11:38:25	375868	1.43874e-08	-2.29128e-11	4.15307e-07	1.20668e-10	3.97326e-09	9.32304e-09	-4.58256e-14	4.1323e-07	1.20547e-10
2022-04-01 11:38:34	384181	1.45131e-08	-2.83288e-11	4.15038e-07	1.21732e-10	3.58439e-09	9.40449e-09	-5.66576e-14	4.12963e-07	1.2161e-10
2022-04-01 11:38:42	392494	1.45668e-08	-3.31815e-11	4.14949e-07	1.02855e-10	3.21224e-09	9.43929e-09	-6.6363e-14	4.12874e-07	1.02752e-10
2022-04-01 11:38:50	400807	1.35092e-08	-4.44332e-11	4.11366e-07	9.60726e-11	2.98244e-09	8.75396e-09	-8.88664e-14	4.09309e-07	9.59765e-11
2022-04-01 11:38:59	409120	1.19056e-08	-3.65909e-11	3.86013e-07	3.60554e-11	2.07861e-09	7.71483e-09	-7.31818e-14	3.84083e-07	3.60193e-11
2022-04-01 11:39:07	417944	7.12157e-09	-3.07142e-11	3.48658e-07	1.81997e-11	1.71601e-09	4.61478e-09	-6.14284e-14	3.46915e-07	1.81815e-11
2022-04-01 11:39:16	426787	5.31611e-09	-4.50066e-11	3.40595e-07	-1.06532e-11	1.47209e-09	3.44484e-09	-9.00132e-14	3.38892e-07	-1.06425e-11
2022-04-01 11:39:25	435630	4.06293e-09	-4.64501e-11	3.38983e-07	-2.34779e-11	1.28386e-09	2.63278e-09	-9.29002e-14	3.37288e-07	-2.34544e-11
2022-04-01 11:39:34	444473	3.13781e-09	-4.61839e-11	3.38445e-07	-2.70254e-11	1.12917e-09	2.0333e-09	-9.23678e-14	3.36753e-07	-2.69984e-11
2022-04-01 11:39:43	453316	2.41314e-09	-4.08499e-11	3.43641e-07	-4.09681e-11	1.02449e-09	1.56371e-09	-8.16998e-14	3.41923e-07	-4.09271e-11
2022-04-01 11:39:52	462160	1.91908e-09	-5.13849e-11	3.52509e-07	-5.05786e-11	9.49614e-10	1.24356e-09	-1.0277e-13	3.50746e-07	-5.0528e-11
2022-04-01 11:40:01	471003	1.49992e-09	-4.70337e-11	3.59587e-07	-5.20299e-11	8.71029e-10	9.71948e-10	-9.40674e-14	3.57789e-07	-5.19779e-11
2022-04-01 11:40:09	479846	1.1822e-09	-4.77401e-11	3.65499e-07	-5.59536e-11	8.07321e-10	7.66066e-10	-9.54802e-14	3.63672e-07	-5.58976e-11
2022-04-01 11:40:18	488689	9.1707e-10	-5.74151e-11	3.69888e-07	-5.48141e-11	7.27071e-10	5.94261e-10	-1.1483e-13	3.68039e-07	-5.47593e-11
2022-04-01 11:40:28	498573	6.69261e-10	-5.5777e-11	3.73562e-07	-6.19414e-11	6.71329e-10	4.33681e-10	-1.11554e-13	3.71694e-07	-6.18795e-11
2022-04-01 11:40:39	509626	4.87823e-10	-5.94013e-11	3.74637e-07	-6.35324e-11	6.0947e-10	3.16109e-10	-1.18803e-13	3.72764e-07	-6.34689e-11
2022-04-01 11:40:53	523930	3.16834e-10	-5.91863e-11	3.59676e-07	-7.95821e-11	6.26194e-10	2.05308e-10	-1.18373e-13	3.57878e-07	-7.95025e-11
2022-04-01 11:41:07	537193	1.87447e-10	-5.50399e-11	2.58895e-07	-7.34331e-11	7.41929e-10	1.21466e-10	-1.1008e-13	2.57601e-07	-7.33597e-11
2022-04-01 11:41:20	550456	8.40648e-11	-5.58896e-11	1.66535e-07	-8.33231e-11	8.26421e-10	5.4474e-11	-1.11779e-13	1.65702e-07	-8.32398e-11
2022-04-01 11:41:33	563720	3.75174e-11	-4.23447e-11	1.04632e-07	-8.93108e-11	8.45871e-10	2.43113e-11	-8.46894e-14	1.04109e-07	-8.92215e-11
2022-04-01 11:41:46	576983	1.02124e-12	-4.8252e-11	6.49663e-08	-8.46668e-11	8.31957e-10	6.61764e-13	-9.6504e-14	6.46415e-08	-8.45821e-11
2022-04-01 11:42:00	590756	-2.34242e-11	-4.82623e-11	4.20049e-08	-9.57608e-11	7.98579e-10	-1.51789e-11	-9.65246e-14	4.17949e-08	-9.5665e-11
2022-04-01 11:42:14	604270	-4.54294e-11	-5.05658e-11	2.82444e-08	-9.05148e-11	7.63429e-10	-2.94383e-11	-1.01132e-13	2.81032e-08	-9.04243e-11
2022-04-01 11:42:27	617783	-3.88934e-11	-5.96777e-11	1.98123e-08	-9.43741e-11	7.25629e-10	-2.52029e-11	-1.19355e-13	1.97132e-08	-9.42797e-11
2022-04-01 11:42:41	631296	-6.53921e-11	-3.81061e-11	1.46798e-08	-9.25466e-11	6.92499e-10	-4.23741e-11	-7.62122e-14	1.46064e-08	-9.24541e-11
2022-04-01 11:42:54	644810	-6.21456e-11	-6.36808e-11	1.15667e-08	-7.57443e-11	6.68241e-10	-4.02703e-11	-1.27362e-13	1.15089e-08	-7.56686e-11
2022-04-01 11:43:08	658323	-7.13798e-11	-4.79347e-11	9.64358e-09	-9.47288e-11	6.29227e-10	-4.62541e-11	-9.58694e-14	9.59536e-09	-9.46341e-11
2022-04-01 11:43:21	671836	-5.51581e-11	-5.7968e-11	8.46333e-09	-8.88486e-11	6.06744e-10	-3.57424e-11	-1.15936e-13	8.42101e-09	-8.87598e-11
2022-04-01 11:43:35	685350	-7.77116e-11	-4.44128e-11	7.66662e-09	-1.02361e-10	5.79239e-10	-5.03571e-11	-8.88256e-14	7.62829e-09	-1.02259e-10
2022-04-01 11:43:48	698863	-7.25193e-11	-4.70132e-11	7.1408e-09	-1.0134e-10	5.64704e-10	-4.69925e-11	-9.40264e-14	7.1051e-09	-1.01239e-10
2022-04-01 11:44:03	713416	-7.26806e-11	-5.19275e-11	6.82534e-09	-1.02823e-10	5.36693e-10	-4.7097e-11	-1.03855e-13	6.79121e-09	-1.0272e-10
2022-04-01 11:44:17	727460	-6.41344e-11	-5.56132e-11	6.61182e-09	-1.06704e-10	5.16006e-10	-4.15591e-11	-1.11226e-13	6.57876e-09	-1.06597e-10
2022-04-01 11:44:31	741503	-8.40433e-11	-3.53213e-11	6.4631e-09	-9.84698e-11	5.04542e-10	-5.44601e-11	-7.06426e-14	6.43078e-09	-9.83713e-11
2022-04-01 11:44:45	755546	-7.74643e-11	-5.96982e-11	6.35115e-09	-1.06736e-10	4.9658e-10	-5.01969e-11	-1.19396e-13	6.31939e-09	-1.06629e-10
2022-04-01 11:44:59	769590	-7.93456e-11	-6.39265e-11	6.2709e-09	-1.03844e-10	4.74796e-10	-5.14159e-11	-1.27853e-13	6.23955e-09	-1.0374e-10
2022-04-01 11:45:13	783633	-7.21001e-11	-5.43232e-11	6.21448e-09	-9.72335e-11	4.59823e-10	-4.67209e-11	-1.08646e-13	6.18341e-09	-9.71363e-11
2022-04-01 11:45:27	797676	-8.14526e-11	-5.7067e-11	6.16592e-09	-9.10523e-11	4.45679e-10	-5.27813e-11	-1.14134e-13	6.13509e-09	-9.09612e-11
2022-04-01 11:45:41	811720	-8.07538e-11	-6.33942e-11	6.11164e-09	-1.09897e-10	4.28716e-10	-5.23285e-11	-1.26788e-13	6.08108e-09	-1.09787e-10
2022-04-01 11:45:55	825763	-9.11383e-11	-6.71822e-11	6.07573e-09	-1.07671e-10	4.25231e-10	-5.90576e-11	-1.34364e-13	6.04535e-09	-1.07563e-10
2022-04-01 11:46:09	839806	-7.81308e-11	-5.95549e-11	6.05411e-09	-1.08284e-10	4.27089e-10	-5.06288e-11	-1.1911e-13	6.02384e-09	-1.08176e-10
2022-04-01 11:46:23	853850	-9.22241e-11	-5.53266e-11	6.03638e-09	-9.46106e-11	4.05336e-10	-5.97612e-11	-1.10653e-13	6.0062e-09	-9.4516e-11
2022-04-01 11:46:37	867893	-9.22993e-11	-6.55134e-11	6.03172e-09	-1.09639e-10	4.03776e-10	-5.98099e-11	-1.31027e-13	6.00156e-09	-1.09529e-10
2022-04-01 11:46:51	881936	-8.65481e-11	-5.63709e-11	6.00834e-09	-1.07467e-10	3.91491e-10	-5.60832e-11	-1.12742e-13	5.9783e-09	-1.0736e-10
2022-04-01 11:47:05	895980	-8.73651e-11	-6.23704e-11	5.95667e-09	-1.04285e-10	3.74069e-10	-5.66126e-11	-1.24741e-13	5.92689e-09	-1.04181e-10
2022-04-01 11:47:20	910023	-8.52688e-11	-6.29642e-11	5.96652e-09	-1.14035e-10	3.67211e-10	-5.52542e-11	-1.25928e-13	5.93669e-09	-1.13921e-10
2022-04-01 11:47:34	924066	-8.51291e-11	-5.01972e-11	5.93842e-09	-1.09015e-10	3.79505e-10	-5.51637e-11	-1.00394e-13	5.90873e-09	-1.08906e-10
2022-04-01 11:47:48	938110	-8.08613e-11	-6.38958e-11	5.95025e-09	-9.92545e-11	3.62059e-10	-5.23981e-11	-1.27792e-13	5.9205e-09	-9.91552e-11
2022-04-01 11:48:02	952153	-9.01493e-11	-6.86974e-11	5.93626e-09	-1.10155e-10	3.73707e-10	-5.84167e-11	-1.37395e-13	5.90658e-09	-1.10045e-10
2022-04-01 11:48:16	966196	-7.86038e-11	-6.41825e-11	5.91988e-09	-1.07478e-10	3.62374e-10	-5.09353e-11	-1.28365e-13	5.89028e-09	-1.07371e-10
2022-04-01 11:48:30	980240	-8.96763e-11	-6.44896e-11	5.90177e-09	-1.03866e-10	3.62397e-10	-5.81102e-11	-1.28979e-13	5.87226e-09	-1.03762e-10
2022-04-01 11:48:44	994283	-8.76768e-11	-6.24215e-11	5.89956e-09	-9.86633e-11	3.51793e-10	-5.68146e-11	-1.24843e-13	5.87006e-09	-9.85646e-11
2022-04-01 11:48:58	1008326	-7.66688e-11	-5.84799e-11	5.89445e-09	-1.04919e-10	3.49459e-10	-4.96814e-11	-1.1696e-13	5.86498e-09	-1.04814e-10
2022-04-01 11:49:12	1022370	-8.14633e-11	-5.57872e-11	5.86146e-09	-1.12326e-10	3.43891e-10	-5.27882e-11	-1.11574e-13	5.83215e-09	-1.12214e-10
2022-04-01 11:49:26	1036413	-7.93778e-11	-6.4633e-11	5.85852e-09	-1.01888e-10	3.36605e-10	-5.14368e-11	-1.29266e-13	5.82923e-09	-1.01786e-10
2022-04-01 11:49:40	1050456	-7.86576e-11	-5.53266e-11	5.84709e-09	-1.0694e-10	3.35169e-10	-5.09701e-11	-1.10653e-13	5.81785e-09	-1.06833e-10
2022-04-01 11:49:54	1064500	-8.75801e-11	-5.5859e-11	5.84673e-09	-9.81903e-11	3.29333e-10	-5.67519e-11	-1.11718e-13	5.8175e-09	-9.80921e-11
2022-04-01 11:50:08	1078543	-8.22266e-11	-5.91044e-11	5.82968e-09	-1.0866e-10	3.27129e-10	-5.32828e-11	-1.18209e-13	5.80053e-09	-1.08551e-10
2022-04-01 11:50:22	1092586	-8.25491e-11	-6.56465e-11	5.85083e-09	-1.08488e-10	3.38233e-10	-5.34918e-11	-1.31293e-13	5.82158e-09	-1.0838e-10
2022-04-01 11:50:36	1106630	-8.45916e-11	-5.66268e-11	5.84598e-09	-1.1224e-10	3.30254e-10	-5.48154e-11	-1.13254e-13	5.81675e-09	-1.12128e-10
2022-04-01 11:50:50	1120673	-8.80101e-11	-5.33915e-11	5.82809e-09	-1.04124e-10	3.27874e-10	-5.70305e-11	-1.06783e-13	5.79895e-09	-1.0402e-10
2022-04-01 11:51:04	1134716	-7.97971e-11	-6.62198e-11	5.82378e-09	-1.1324e-10	3.18736e-10	-5.17085e-11	-1.3244e-13	5.79466e-09	-1.13127e-10
2022-04-01 11:51:18	1148760	-9.51911e-11	-6.53906e-11	5.81835e-09	-1.0909e-10	3.11281e-10	-6.16838e-11	-1.30781e-13	5.78926e-09	-1.08981e-10
2022-04-01 11:51:32	1162803	-9.14608e-11	-5.90634e-11	5.83398e-09	-1.07478e-10	3.1618e-10	-5.92666e-11	-1.18127e-13	5.80481e-09	-1.07371e-10
2022-04-01 11:51:46	1176846	-9.18908e-11	-6.22065e-11	5.82844e-09	-1.10982e-10	3.11266e-10	-5.95452e-11	-1.24413e-13	5.7993e-09	-1.10871e-10
2022-04-01 11:52:00	1190890	-9.74808e-11	-6.23191e-11	5.82194e-09	-1.04887e-10	3.20419e-10	-6.31676e-11	-1.24638e-13	5.79283e-09	-1.04782e-10
2022-04-01 11:52:14	1204933	-8.20116e-11	-7.20658e-11	5.81578e-09	-1.17862e-10	3.17946e-10	-5.31435e-11	-1.44132e-13	5.7867e-09	-1.17744e-10
2022-04-01 11:52:28	1218976	-8.73866e-11	-5.80909e-11	5.82822e-09	-1.1109e-10	3.14383e-10	-5.66265e-11	-1.16182e-13	5.79908e-09	-1.10979e-10
2022-04-01 11:52:43	1233020	-8.45271e-11	-5.92682e-11	5.83055e-09	-9.67391e-11	3.133e-10	-5.47736e-11	-1.18536e-13	5.8014e-09	-9.66424e-11
2022-04-01 11:52:57	1247063	-7.90553e-11	-5.73025e-11	5.81474e-09	-1.08349e-10	3.08301e-10	-5.12278e-11	-1.14605e-13	5.78567e-09	-1.08241e-10
2022-04-01 11:53:11	1261106	-7.96143e-11	-5.99747e-11	5.82911e-09	-9.7857e-11	3.13991e-10	-5.15901e-11	-1.19949e-13	5.79996e-09	-9.77591e-11
2022-04-01 11:53:25	1275150	-7.16486e-11	-5.42515e-11	5.82607e-09	-1.02017e-10	3.20564e-10	-4.64283e-11	-1.08503e-13	5.79694e-09	-1.01915e-10
2022-04-01 11:53:39	1289193	-7.11756e-11	-6.77249e-11	5.81908e-09	-1.07833e-10	3.15926e-10	-4.61218e-11	-1.3545e-13	5.78998e-09	-1.07725e-10
2022-04-01 11:53:53	1303236	-8.42583e-11	-5.64118e-11	6.18556e-09	-1.0392e-10	3.19489e-10	-5.45994e-11	-1.12824e-13	6.15463e-09	-1.03816e-10
2022-04-01 11:54:07	1317280	-8.20331e-11	-6.1111e-11	5.17194e-09	-9.46428e-11	3.06159e-10	-5.31574e-11	-1.22222e-13	5.14608e-09	-9.45482e-11
2022-04-01 11:54:21	1331323	-7.71311e-11	-5.54699e-11	5.04861e-09	-1.06328e-10	3.06551e-10	-4.9981e-11	-1.1094e-13	5.02337e-09	-1.06222e-10
2022-04-01 11:54:35	1345366	-7.66151e-11	-7.05096e-11	5.1369e-09	-1.04532e-10	3.0083e-10	-4.96466e-11	-1.41019e-13	5.11122e-09	-1.04427e-10
2022-04-01 11:54:49	1359410	-8.62363e-11	-6.50527e-11	5.34398e-09	-1.01157e-10	3.06159e-10	-5.58811e-11	-1.30105e-13	5.31726e-09	-1.01056e-10
2022-04-01 11:55:03	1373453	-8.69996e-11	-5.86232e-11	5.46038e-09	-1.11369e-10	3.08209e-10	-5.63757e-11	-1.17246e-13	5.43308e-09	-1.11258e-10
2022-04-01 11:55:17	1387496	-7.13046e-11	-6.59741e-11	5.53124e-09	-1.05833e-10	3.09822e-10	-4.62054e-11	-1.31948e-13	5.50358e-09	-1.05727e-10
2022-04-01 11:55:31	1401540	-8.24093e-11	-6.71003e-11	1.81433e-08	-1.11273e-10	3.54803e-10	-5.34012e-11	-1.34201e-13	1.80526e-08	-1.11162e-10
2022-04-01 11:55:46	1416093	-9.54168e-11	-6.26774e-11	1.09381e-07	-1.09725e-10	3.33495e-10	-6.18301e-11	-1.25355e-13	1.08834e-07	-1.09615e-10
2022-04-01 11:55:59	1429867	-1.02296e-10	-6.63222e-11	2.29423e-07	-1.13401e-10	2.88974e-10	-6.62878e-11	-1.32644e-13	2.28276e-07	-1.13288e-10
2022-04-01 11:56:13	1443130	-8.89453e-11	-8.38601e-11	3.00999e-07	-9.04826e-11	2.59136e-10	-5.76366e-11	-1.6772e-13	2.99494e-07	-9.03921e-11
2022-04-01 11:56:26	1456393	-9.35893e-11	-7.67344e-11	3.29755e-07	-1.01146e-10	2.43986e-10	-6.06459e-11	-1.53469e-13	3.28106e-07	-1.01045e-10
2022-04-01 11:56:39	1469656	-9.80721e-11	-7.40417e-11	3.51883e-07	-1.15669e-10	2.30034e-10	-6.35507e-11	-1.48083e-13	3.50124e-07	-1.15553e-10
2022-04-01 11:56:52	1482920	-9.25896e-11	-8.61022e-11	3.76787e-07	-9.43418e-11	2.19721e-10	-5.99981e-11	-1.72204e-13	3.74903e-07	-9.42475e-11
2022-04-01 11:57:06	1496183	-1.01307e-10	-8.0543e-11	3.92284e-07	-1.00576e-10	2.13264e-10	-6.56469e-11	-1.61086e-13	3.90323e-07	-1.00475e-10
2022-04-01 11:57:19	1509446	-1.00544e-10	-7.73384e-11	4.00526e-07	-9.80291e-11	2.10108e-10	-6.51525e-11	-1.54677e-13	3.98523e-07	-9.79311e-11
2022-04-01 11:57:32	1522710	-7.25623e-12	-7.51782e-11	4.01422e-07	-8.43228e-11	1.05452e-09	-4.70204e-12	-1.50356e-13	3.99415e-07	-8.42385e-11
2022-04-01 11:57:45	1535973	2.76157e-09	-6.77965e-11	3.83595e-07	-2.27039e-11	2.96156e-09	1.7895e-09	-1.35593e-13	3.81677e-07	-2.26812e-11
2022-04-01 11:58:02	1552486	6.11112e-09	-7.47789e-11	3.55824e-07	2.69179e-11	4.09001e-09	3.96001e-09	-1.49558e-13	3.54045e-07	2.6891e-11
2022-04-01 11:58:14	1564580	8.16396e-09	-5.92068e-11	3.62453e-07	4.52789e-11	4.19868e-09	5.29025e-09	-1.18414e-13	3.60641e-07	4.52336e-11
2022-04-01 11:58:23	1573423	9.39591e-09	-6.48274e-11	3.6747e-07	5.97591e-11	4.05386e-09	6.08855e-09	-1.29655e-13	3.65633e-07	5.96993e-11
2022-04-01 11:58:33	1583307	1.04428e-08	-6.07834e-11	3.72218e-07	5.35241e-11	3.71974e-09	6.76693e-09	-1.21567e-13	3.70357e-07	5.34706e-11
2022-04-01 11:58:41	1591620	1.12612e-08	-7.50553e-11	3.7383e-07	7.21646e-11	3.37277e-09	7.29726e-09	-1.50111e-13	3.71961e-07	7.20924e-11
2022-04-01 11:58:49	1599933	1.17348e-08	-7.5475e-11	3.73562e-07	6.41344e-11	3.01177e-09	7.60415e-09	-1.5095e-13	3.71694e-07	6.40703e-11
2022-04-01 11:58:58	1608246	1.21541e-08	-5.82239e-11	3.73113e-07	5.82649e-11	2.69258e-09	7.87586e-09	-1.16448e-13	3.71247e-07	5.82066e-11
2022-04-01 11:59:06	1616559	1.24873e-08	-5.0832e-11	3.73203e-07	5.89099e-11	2.42553e-09	8.09177e-09	-1.01664e-13	3.71337e-07	5.8851e-11
2022-04-01 11:59:14	1624872	1.28186e-08	-6.56977e-11	3.74188e-07	4.52144e-11	2.20541e-09	8.30645e-09	-1.31395e-13	3.72317e-07	4.51692e-11
2022-04-01 11:59:23	1633185	1.29852e-08	-6.52165e-11	3.74547e-07	4.05381e-11	1.98389e-09	8.41441e-09	-1.30433e-13	3.72674e-07	4.04976e-11
2022-04-01 11:59:31	1641498	1.31666e-08	-6.1193e-11	3.74995e-07	4.12046e-11	1.79761e-09	8.53196e-09	-1.22386e-13	3.7312e-07	4.11634e-11
2022-04-01 11:59:39	1649811	1.33608e-08	-5.25828e-11	3.75263e-07	3.61736e-11	1.65236e-09	8.6578e-09	-1.05166e-13	3.73387e-07	3.61374e-11
2022-04-01 11:59:48	1658125	1.29529e-08	-6.82572e-11	3.7822e-07	3.07772e-11	1.51505e-09	8.39348e-09	-1.36514e-13	3.76329e-07	3.07464e-11
2022-04-01 11:59:56	1666438	1.15857e-08	-6.62915e-11	3.94076e-07	5.63299e-12	1.21381e-09	7.50753e-09	-1.32583e-13	3.92106e-07	5.62736e-12
2022-04-01 12:00:05	1675261	7.54327e-09	-6.40391e-11	3.25903e-07	-3.02827e-11	1.0156e-09	4.88804e-09	-1.28078e-13	3.24273e-07	-3.02524e-11
2022-04-01 12:00:14	1684105	5.51799e-09	-6.29436e-11	3.1578e-07	-4.46231e-11	8.89693e-10	3.57566e-09	-1.25887e-13	3.14201e-07	-4.45785e-11
2022-04-01 12:00:22	1692948	4.20139e-09	-7.1687e-11	3.12734e-07	-5.06001e-11	8.09257e-10	2.7225e-09	-1.43374e-13	3.1117e-07	-5.05495e-11
2022-04-01 12:00:31	1701791	3.22299e-09	-7.5127e-11	3.11391e-07	-6.52524e-11	7.37107e-10	2.0885e-09	-1.50254e-13	3.09834e-07	-6.51871e-11
2022-04-01 12:00:40	1710634	2.48898e-09	-6.80934e-11	3.1578e-07	-6.37366e-11	6.88943e-10	1.61286e-09	-1.36187e-13	3.14201e-07	-6.36729e-11
2022-04-01 12:00:49	1719477	1.9683e-09	-6.3691e-11	3.23484e-07	-7.76041e-11	6.27606e-10	1.27546e-09	-1.27382e-13	3.21867e-07	-7.75265e-11
2022-04-01 12:01:01	1731571	1.42638e-09	-8.12493e-11	3.34503e-07	-8.57526e-11	5.75231e-10	9.24294e-10	-1.62499e-13	3.3283e-07	-8.56668e-11
2022-04-01 12:01:12	1742624	1.05124e-09	-7.43898e-11	3.42745e-07	-9.8717e-11	5.25697e-10	6.81204e-10	-1.4878e-13	3.41031e-07	-9.86183e-11
2022-04-01 12:01:24	1754718	7.2429e-10	-7.71336e-11	3.49284e-07	-1.02544e-10	4.85361e-10	4.6934e-10	-1.54267e-13	3.47538e-07	-1.02441e-10
2022-04-01 12:01:37	1767981	4.91456e-10	-8.10036e-11	3.52599e-07	-8.95258e-11	4.38207e-10	3.18463e-10	-1.62007e-13	3.50836e-07	-8.94363e-11
2022-04-01 12:01:51	1781244	3.39204e-10	-8.78325e-11	3.47672e-07	-9.74915e-11	4.4832e-10	2.19804e-10	-1.75665e-13	3.45934e-07	-9.7394e-11
2022-04-01 12:02:04	1794508	2.06593e-10	-8.03279e-11	2.68302e-07	-9.67821e-11	5.93767e-10	1.33872e-10	-1.60656e-13	2.6696e-07	-9.66853e-11
2022-04-01 12:02:17	1807771	1.03135e-10	-7.61815e-11	1.7397e-07	-1.04403e-10	7.13799e-10	6.68315e-11	-1.52363e-13	1.731e-07	-1.04299e-10
2022-04-01 12:02:31	1821034	3.89364e-11	-6.16025e-11	1.10187e-07	-1.0307e-10	7.57229e-10	2.52308e-11	-1.23205e-13	1.09636e-07	-1.02967e-10
2022-04-01 12:02:44	1834297	-1.00942e-11	-6.84927e-11	6.85624e-08	-1.0779e-10	7.685e-10	-6.54104e-12	-1.36985e-13	6.82196e-08	-1.07682e-10
2022-04-01 12:02:58	1848071	-3.68616e-11	-7.21068e-11	4.43212e-08	-1.07338e-10	7.56829e-10	-2.38863e-11	-1.44214e-13	4.40996e-08	-1.07231e-10
2022-04-01 12:03:11	1861584	-5.35994e-11	-7.67139e-11	2.95837e-08	-1.06295e-10	7.1435e-10	-3.47324e-11	-1.53428e-13	2.94358e-08	-1.06189e-10
2022-04-01 12:03:25	1875098	-6.29519e-11	-6.9322e-11	2.06735e-08	-1.08037e-10	6.87661e-10	-4.07928e-11	-1.38644e-13	2.05701e-08	-1.07929e-10
2022-04-01 12:03:38	1888611	-6.30594e-11	-6.94449e-11	1.5252e-08	-1.12896e-10	6.70591e-10	-4.08625e-11	-1.3889e-13	1.51757e-08	-1.12783e-10
2022-04-01 12:03:52	1902124	-7.21001e-11	-6.8595e-11	1.18691e-08	-1.21388e-10	6.48715e-10	-4.67209e-11	-1.3719e-13	1.18098e-08	-1.21267e-10
2022-04-01 12:04:05	1915637	-8.02163e-11	-8.28977e-11	9.79367e-09	-1.16981e-10	6.15928e-10	-5.19802e-11	-1.65795e-13	9.7447e-09	-1.16864e-10
2022-04-01 12:04:19	1929151	-8.90313e-11	-7.56901e-11	8.51033e-09	-1.20507e-10	5.84354e-10	-5.76923e-11	-1.5138e-13	8.46778e-09	-1.20386e-10
2022-04-01 12:04:32	1942664	-8.45486e-11	-8.54777e-11	7.75673e-09	-1.18443e-10	5.62047e-10	-5.47875e-11	-1.70955e-13	7.71795e-09	-1.18325e-10
2022-04-01 12:04:46	1956177	-8.71931e-11	-7.36936e-11	7.13306e-09	-1.17938e-10	5.29375e-10	-5.65011e-11	-1.47387e-13	7.09739e-09	-1.1782e-10
2022-04-01 12:05:00	1970731	-7.94423e-11	-8.0973e-11	6.82408e-09	-1.26065e-10	5.16521e-10	-5.14786e-11	-1.61946e-13	6.78996e-09	-1.25939e-10
2022-04-01 12:05:14	1984775	-8.23341e-11	-8.95012e-11	6.61975e-09	-1.19174e-10	4.97324e-10	-5.33525e-11	-1.79002e-13	6.58665e-09	-1.19055e-10
2022-04-01 12:05:28	1998818	-9.10201e-11	-7.73793e-11	6.4753e-09	-1.19916e-10	4.91205e-10	-5.8981e-11	-1.54759e-13	6.44292e-09	-1.19796e-10
2022-04-01 12:05:42	2012861	-8.96118e-11	-8.2007e-11	6.38183e-09	-1.06575e-10	4.72039e-10	-5.80684e-11	-1.64014e-13	6.34992e-09	-1.06468e-10
2022-04-01 12:05:56	2026905	-8.89023e-11	-6.0077e-11	6.31727e-09	-1.10208e-10	4.56052e-10	-5.76087e-11	-1.20154e-13	6.28568e-09	-1.10098e-10
2022-04-01 12:06:10	2040948	-8.27211e-11	-7.43284e-11	6.23872e-09	-1.18325e-10	4.4422e-10	-5.36033e-11	-1.48657e-13	6.20753e-09	-1.18207e-10
2022-04-01 12:06:24	2054991	-8.51183e-11	-6.8933e-11	6.18497e-09	-1.10542e-10	4.42791e-10	-5.51567e-11	-1.37866e-13	6.15405e-09	-1.10431e-10
2022-04-01 12:06:39	2069035	-8.45378e-11	-7.4912e-11	6.15325e-09	-1.05242e-10	4.29922e-10	-5.47805e-11	-1.49824e-13	6.12248e-09	-1.05137e-10
2022-04-01 12:06:53	2083078	-9.38688e-11	-7.48812e-11	6.15477e-09	-1.12724e-10	4.33815e-10	-6.0827e-11	-1.49762e-13	6.124e-09	-1.12611e-10
2022-04-01 12:07:07	2097121	-7.53896e-11	-6.98953e-11	6.11581e-09	-1.09004e-10	4.31089e-10	-4.88525e-11	-1.39791e-13	6.08523e-09	-1.08895e-10
2022-04-01 12:07:21	2111165	-9.29228e-11	-7.1216e-11	6.10243e-09	-1.0866e-10	4.19925e-10	-6.0214e-11	-1.42432e-13	6.07192e-09	-1.08551e-10
2022-04-01 12:07:35	2125208	-1.0034e-10	-6.23498e-11	6.07166e-09	-1.09639e-10	4.12154e-10	-6.50203e-11	-1.247e-13	6.0413e-09	-1.09529e-10
2022-04-01 12:07:49	2139251	-8.92033e-11	-6.79501e-11	6.07233e-09	-1.11251e-10	4.17944e-10	-5.78037e-11	-1.359e-13	6.04197e-09	-1.1114e-10
2022-04-01 12:08:03	2153295	-9.10308e-11	-6.4633e-11	6.03941e-09	-9.79323e-11	4.07486e-10	-5.8988e-11	-1.29266e-13	6.00921e-09	-9.78344e-11
2022-04-01 12:08:17	2167338	-8.32693e-11	-6.19096e-11	6.04535e-09	-1.12724e-10	3.95254e-10	-5.39585e-11	-1.23819e-13	6.01512e-09	-1.12611e-10
2022-04-01 12:08:31	2181381	-9.36753e-11	-7.03765e-11	6.0363e-09	-1.14723e-10	3.95522e-10	-6.07016e-11	-1.40753e-13	6.00612e-09	-1.14608e-10
2022-04-01 12:08:45	2195425	-8.81606e-11	-5.95651e-11	6.02144e-09	-1.1883e-10	3.8951e-10	-5.71281e-11	-1.1913e-13	5.99133e-09	-1.18711e-10
2022-04-01 12:08:59	2209468	-8.01196e-11	-6.86565e-11	6.01448e-09	-1.13627e-10	3.7641e-10	-5.19175e-11	-1.37313e-13	5.98441e-09	-1.13513e-10
2022-04-01 12:09:13	2223511	-9.06223e-11	-6.38753e-11	5.98773e-09	-1.05177e-10	3.74122e-10	-5.87233e-11	-1.27751e-13	5.95779e-09	-1.05072e-10
2022-04-01 12:09:27	2237555	-9.38688e-11	-6.59434e-11	5.98767e-09	-1.08381e-10	3.7823e-10	-6.0827e-11	-1.31887e-13	5.95773e-09	-1.08273e-10
2022-04-01 12:09:41	2251598	-7.77331e-11	-5.52139e-11	5.98406e-09	-1.07994e-10	3.75896e-10	-5.0371e-11	-1.10428e-13	5.95414e-09	-1.07886e-10
2022-04-01 12:09:55	2265641	-9.55243e-11	-6.67931e-11	5.9773e-09	-1.11842e-10	3.70421e-10	-6.18997e-11	-1.33586e-13	5.94741e-09	-1.1173e-10
2022-04-01 12:10:09	2279685	-9.40193e-11	-6.64349e-11	5.98857e-09	-1.08327e-10	3.70744e-10	-6.09245e-11	-1.3287e-13	5.95863e-09	-1.08219e-10
2022-04-01 12:10:23	2293728	-8.98591e-11	-7.0315e-11	5.96023e-09	-1.09854e-10	3.68601e-10	-5.82287e-11	-1.4063e-13	5.93043e-09	-1.09744e-10
2022-04-01 12:10:37	2307771	-8.94828e-11	-6.49093e-11	5.96702e-09	-1.17819e-10	3.58435e-10	-5.79849e-11	-1.29819e-13	5.93718e-09	-1.17701e-10
2022-04-01 12:10:51	2321815	-9.76206e-11	-6.62506e-11	5.9606e-09	-1.0493e-10	3.46049e-10	-6.32581e-11	-1.32501e-13	5.9308e-09	-1.04825e-10
2022-04-01 12:11:05	2335858	-8.91818e-11	-7.06325e-11	5.95718e-09	-1.15401e-10	3.4489e-10	-5.77898e-11	-1.41265e-13	5.92739e-09	-1.15286e-10
2022-04-01 12:11:19	2349901	-9.61478e-11	-7.66934e-11	5.94448e-09	-1.07532e-10	3.47001e-10	-6.23038e-11	-1.53387e-13	5.91476e-09	-1.07424e-10
2022-04-01 12:11:33	2363945	-8.69243e-11	-6.25955e-11	5.94621e-09	-1.07833e-10	3.48399e-10	-5.63269e-11	-1.25191e-13	5.91648e-09	-1.07725e-10
2022-04-01 12:11:47	2377988	-9.40301e-11	-7.6673e-11	5.93245e-09	-1.08682e-10	3.48929e-10	-6.09315e-11	-1.53346e-13	5.90279e-09	-1.08573e-10
2022-04-01 12:12:02	2392031	-9.29873e-11	-7.80141e-11	5.94136e-09	-1.17594e-10	3.45289e-10	-6.02558e-11	-1.56028e-13	5.91165e-09	-1.17476e-10
2022-04-01 12:12:16	2406075	-8.81713e-11	-6.35579e-11	5.94393e-09	-1.06758e-10	3.36589e-10	-5.7135e-11	-1.27116e-13	5.91421e-09	-1.06651e-10
2022-04-01 12:12:30	2420118	-8.70748e-11	-6.90763e-11	5.94958e-09	-1.03715e-10	3.4456e-10	-5.64245e-11	-1.38153e-13	5.91983e-09	-1.03611e-10
2022-04-01 12:12:44	2434161	-9.33851e-11	-7.86591e-11	5.9479e-09	-1.06639e-10	3.30899e-10	-6.05135e-11	-1.57318e-13	5.91816e-09	-1.06532e-10
2022-04-01 12:12:58	2448205	-9.00418e-11	-6.93322e-11	5.93602e-09	-1.18636e-10	3.32834e-10	-5.83471e-11	-1.38664e-13	5.90634e-09	-1.18517e-10
2022-04-01 12:13:12	2462248	-1.02092e-10	-7.69493e-11	5.91408e-09	-1.13358e-10	3.28673e-10	-6.61556e-11	-1.53899e-13	5.88451e-09	-1.13245e-10
2022-04-01 12:13:26	2476291	-9.27938e-11	-6.51755e-11	5.91041e-09	-1.26925e-10	3.31222e-10	-6.01304e-11	-1.30351e-13	5.88086e-09	-1.26798e-10
2022-04-01 12:13:40	2490335	-1.0321e-10	-6.29334e-11	5.89627e-09	-1.12229e-10	3.19811e-10	-6.68801e-11	-1.25867e-13	5.86679e-09	-1.12117e-10
2022-04-01 12:13:54	2504378	-8.96763e-11	-6.52677e-11	5.89572e-09	-1.22958e-10	3.15496e-10	-5.81102e-11	-1.30535e-13	5.86624e-09	-1.22835e-10
2022-04-01 12:14:08	2518421	-8.26351e-11	-6.54212e-11	5.88428e-09	-1.12358e-10	3.12095e-10	-5.35475e-11	-1.30842e-13	5.85486e-09	-1.12246e-10
2022-04-01 12:14:22	2532465	-9.01063e-11	-6.4981e-11	5.8888e-09	-1.15637e-10	3.04109e-10	-5.83889e-11	-1.29962e-13	5.85936e-09	-1.15521e-10
2022-04-01 12:14:36	2546508	-9.20198e-11	-6.99158e-11	5.88529e-09	-1.151e-10	2.97068e-10	-5.96288e-11	-1.39832e-13	5.85586e-09	-1.14985e-10
2022-04-01 12:14:50	2560551	-9.45998e-11	-7.23115e-11	6.38543e-09	-1.14121e-10	3.01536e-10	-6.13007e-11	-1.44623e-13	6.3535e-09	-1.14007e-10
2022-04-01 12:15:04	2574595	-1.01587e-10	-6.78477e-11	5.2863e-09	-1.16304e-10	2.97375e-10	-6.58284e-11	-1.35695e-13	5.25987e-09	-1.16188e-10
2022-04-01 12:15:18	2588638	-9.93083e-11	-7.23012e-11	5.12647e-09	-1.15691e-10	3.02159e-10	-6.43518e-11	-1.44602e-13	5.10084e-09	-1.15575e-10
2022-04-01 12:15:32	2602681	-9.13748e-11	-6.90353e-11	5.17362e-09	-1.16239e-10	2.96469e-10	-5.92109e-11	-1.38071e-13	5.14775e-09	-1.16123e-10
2022-04-01 12:15:46	2616724	-8.70426e-11	-7.62327e-11	5.3735e-09	-1.10993e-10	3.06474e-10	-5.64036e-11	-1.52465e-13	5.34663e-09	-1.10882e-10
2022-04-01 12:16:00	2630768	-9.38151e-11	-7.76353e-11	5.50093e-09	-1.18142e-10	2.98411e-10	-6.07922e-11	-1.55271e-13	5.47343e-09	-1.18024e-10
2022-04-01 12:16:14	2644811	-9.52018e-11	-6.81958e-11	5.57918e-09	-1.29408e-10	2.98696e-10	-6.16908e-11	-1.36392e-13	5.55128e-09	-1.29279e-10
2022-04-01 12:16:28	2658854	-9.39333e-11	-6.96087e-11	1.06693e-08	-1.09348e-10	3.34631e-10	-6.08688e-11	-1.39217e-13	1.0616e-08	-1.09239e-10
2022-04-01 12:16:43	2673408	-8.64621e-11	-7.51884e-11	8.93142e-08	-1.08628e-10	3.29679e-10	-5.60274e-11	-1.50377e-13	8.88676e-08	-1.08519e-10
2022-04-01 12:16:57	2687181	-1.05242e-10	-7.3755e-11	2.15448e-07	-1.21152e-10	2.94887e-10	-6.81968e-11	-1.4751e-13	2.14371e-07	-1.21031e-10
2022-04-01 12:17:10	2700445	-1.07822e-10	-8.02563e-11	2.80933e-07	-1.16024e-10	2.67836e-10	-6.98687e-11	-1.60513e-13	2.79528e-07	-1.15908e-10
2022-04-01 12:17:23	2713708	-1.21646e-10	-8.73922e-11	3.2223e-07	-1.03425e-10	2.53154e-10	-7.88266e-11	-1.74784e-13	3.20619e-07	-1.03322e-10
2022-04-01 12:17:36	2726971	-1.05091e-10	-8.4935e-11	3.62453e-07	-1.04339e-10	2.37098e-10	-6.8099e-11	-1.6987e-13	3.60641e-07	-1.04235e-10
2022-04-01 12:17:50	2740235	-1.05779e-10	-8.05327e-11	3.8458e-07	-1.0593e-10	2.31884e-10	-6.85448e-11	-1.61065e-13	3.82657e-07	-1.05824e-10
2022-04-01 12:18:03	2753498	-1.08402e-10	-9.39752e-11	3.97391e-07	-1.15024e-10	2.22762e-10	-7.02445e-11	-1.8795e-13	3.95404e-07	-1.14909e-10
2022-04-01 12:18:16	2766761	-1.09424e-10	-8.97265e-11	4.06438e-07	-1.0679e-10	2.02836e-10	-7.09068e-11	-1.79453e-13	4.04406e-07	-1.06683e-10
2022-04-01 12:18:30	2780024	-9.90611e-11	-8.18022e-11	4.02138e-07	-1.13036e-10	6.47433e-10	-6.41916e-11	-1.63604e-13	4.00127e-07	-1.12923e-10
2022-04-01 12:18:43	2793287	1.9046e-09	-7.80858e-11	3.7598e-07	-4.06671e-11	2.53352e-09	1.23418e-09	-1.56172e-13	3.741e-07	-4.06264e-11
2022-04-01 12:18:59	2809801	5.54196e-09	-7.92427e-11	3.55017e-07	2.08549e-12	3.53506e-09	3.59119e-09	-1.58485e-13	3.53242e-07	2.0834e-12
2022-04-01 12:19:10	2820854	7.6316e-09	-7.87512e-11	3.63349e-07	3.68294e-11	3.7257e-09	4.94528e-09	-1.57502e-13	3.61532e-07	3.67926e-11
2022-04-01 12:19:22	2832948	9.31579e-09	-7.30793e-11	3.67828e-07	3.35829e-11	3.53832e-09	6.03663e-09	-1.46159e-13	3.65989e-07	3.35493e-11
2022-04-01 12:19:32	2842831	1.03985e-08	-8.54368e-11	3.70874e-07	4.31181e-11	3.23866e-09	6.73823e-09	-1.70874e-13	3.6902e-07	4.3075e-11
2022-04-01 12:19:41	2851145	1.11369e-08	-7.44308e-11	3.72038e-07	4.86114e-11	2.90029e-09	7.21671e-09	-1.48862e-13	3.70178e-07	4.85628e-11
2022-04-01 12:19:49	2859458	1.16267e-08	-7.22603e-11	3.72666e-07	4.82244e-11	2.58787e-09	7.5341e-09	-1.44521e-13	3.70803e-07	4.81762e-11
2022-04-01 12:19:57	2867771	1.20983e-08	-8.06146e-11	3.71233e-07	3.25939e-11	2.30673e-09	7.8397e-09	-1.61229e-13	3.69377e-07	3.25613e-11
2022-04-01 12:20:06	2876084	1.23563e-08	-7.05506e-11	3.71142e-07	4.07639e-11	2.05254e-09	8.00688e-09	-1.41101e-13	3.69286e-07	4.07231e-11
2022-04-01 12:20:14	2884397	1.26903e-08	-6.96393e-11	3.71591e-07	2.86057e-11	1.85521e-09	8.22331e-09	-1.39279e-13	3.69733e-07	2.85771e-11
2022-04-01 12:20:22	2892710	1.28421e-08	-8.02665e-11	3.72308e-07	2.92292e-11	1.67186e-09	8.32168e-09	-1.60533e-13	3.70446e-07	2.92e-11
2022-04-01 12:20:31	2901023	1.30625e-08	-8.07477e-11	3.72397e-07	2.06184e-11	1.52186e-09	8.4645e-09	-1.61495e-13	3.70535e-07	2.05978e-11
2022-04-01 12:20:39	2909336	1.31478e-08	-7.54649e-11	3.72576e-07	1.61249e-11	1.37834e-09	8.51977e-09	-1.5093e-13	3.70713e-07	1.61088e-11
2022-04-01 12:20:47	2917650	1.27447e-08	-8.51296e-11	3.75622e-07	1.66517e-11	1.23471e-09	8.25857e-09	-1.70259e-13	3.73744e-07	1.6635e-11
2022-04-01 12:20:55	2925963	1.13566e-08	-7.95396e-11	4.04916e-07	-1.14164e-11	1.03257e-09	7.35908e-09	-1.59079e-13	4.02891e-07	-1.1405e-11
2022-04-01 12:21:04	2934786	7.55358e-09	-8.79041e-11	3.24828e-07	-4.63001e-11	8.47021e-10	4.89472e-09	-1.75808e-13	3.23204e-07	-4.62538e-11
2022-04-01 12:21:13	2943630	5.50405e-09	-7.91506e-11	3.13093e-07	-5.87164e-11	7.71543e-10	3.56662e-09	-1.58301e-13	3.11528e-07	-5.86577e-11
2022-04-01 12:21:22	2952473	4.17832e-09	-8.43617e-11	3.10137e-07	-7.25946e-11	7.01121e-10	2.70755e-09	-1.68723e-13	3.08586e-07	-7.2522e-11
2022-04-01 12:21:31	2961316	3.18528e-09	-7.4011e-11	3.09867e-07	-6.22316e-11	6.46504e-10	2.06406e-09	-1.48022e-13	3.08318e-07	-6.21694e-11
2022-04-01 12:21:40	2970159	2.46178e-09	-8.31025e-11	3.1372e-07	-6.89933e-11	5.80169e-10	1.59523e-09	-1.66205e-13	3.12151e-07	-6.89243e-11
2022-04-01 12:21:52	2982253	1.80552e-09	-7.34172e-11	3.24649e-07	-8.23018e-11	5.43734e-10	1.16998e-09	-1.46834e-13	3.23026e-07	-8.22195e-11
2022-04-01 12:22:03	2993306	1.33796e-09	-7.86182e-11	3.33787e-07	-9.18693e-11	4.99021e-10	8.66998e-10	-1.57236e-13	3.32118e-07	-9.17774e-11
2022-04-01 12:22:14	3004360	9.61564e-10	-7.11341e-11	3.42387e-07	-9.62123e-11	4.61581e-10	6.23093e-10	-1.42268e-13	3.40675e-07	-9.61161e-11
2022-04-01 12:22:26	3016453	6.72389e-10	-7.57515e-11	3.48837e-07	-9.52126e-11	4.35074e-10	4.35708e-10	-1.51503e-13	3.47093e-07	-9.51174e-11
2022-04-01 12:22:39	3029716	4.56616e-10	-9.56543e-11	3.52599e-07	-1.0092e-10	4.10234e-10	2.95887e-10	-1.91309e-13	3.50836e-07	-1.00819e-10
2022-04-01 12:22:52	3042980	3.16802e-10	-8.31639e-11	3.45163e-07	-8.86873e-11	4.28863e-10	2.05288e-10	-1.66328e-13	3.43437e-07	-8.85986e-11
2022-04-01 12:23:06	3056243	1.87028e-10	-8.56006e-11	2.56566e-07	-1.05382e-10	5.77274e-10	1.21194e-10	-1.71201e-13	2.55283e-07	-1.05277e-10
2022-04-01 12:23:19	3069506	7.71633e-11	-8.59384e-11	1.65639e-07	-1.04554e-10	6.77218e-10	5.00018e-11	-1.71877e-13	1.64811e-07	-1.04449e-10
2022-04-01 12:23:32	3082770	2.36284e-11	-7.82803e-11	1.04991e-07	-1.21141e-10	7.23057e-10	1.53112e-11	-1.56561e-13	1.04466e-07	-1.2102e-10
2022-04-01 12:23:46	3096033	-6.57899e-12	-7.34479e-11	6.53716e-08	-1.16777e-10	7.21757e-10	-4.26319e-12	-1.46896e-13	6.50447e-08	-1.1666e-10
2022-04-01 12:23:59	3109806	-3.97641e-11	-7.1472e-11	4.25217e-08	-1.15938e-10	7.044e-10	-2.57671e-11	-1.42944e-13	4.23091e-08	-1.15822e-10
2022-04-01 12:24:13	3123320	-6.05116e-11	-7.49017e-11	2.85798e-08	-1.18497e-10	6.78746e-10	-3.92115e-11	-1.49803e-13	2.84369e-08	-1.18379e-10
2022-04-01 12:24:26	3136833	-7.11863e-11	-7.55058e-11	2.00178e-08	-1.09155e-10	6.67074e-10	-4.61287e-11	-1.51012e-13	1.99177e-08	-1.09046e-10
2022-04-01 12:24:40	3150346	-7.66366e-11	-7.51782e-11	1.48937e-08	-1.1611e-10	6.35616e-10	-4.96605e-11	-1.50356e-13	1.48192e-08	-1.15994e-10
2022-04-01 12:24:53	3163860	-9.17403e-11	-8.77403e-11	1.16715e-08	-1.18486e-10	5.98466e-10	-5.94477e-11	-1.75481e-13	1.16131e-08	-1.18368e-10
2022-04-01 12:25:07	3177373	-8.30328e-11	-8.7341e-11	9.73258e-09	-1.3159e-10	5.82357e-10	-5.38053e-11	-1.74682e-13	9.68392e-09	-1.31458e-10
2022-04-01 12:25:20	3190886	-9.63091e-11	-8.43617e-11	8.54275e-09	-1.29279e-10	5.61686e-10	-6.24083e-11	-1.68723e-13	8.50004e-09	-1.2915e-10
2022-04-01 12:25:34	3204400	-8.50646e-11	-7.22603e-11	7.73102e-09	-1.10466e-10	5.41645e-10	-5.51219e-11	-1.44521e-13	7.69236e-09	-1.10356e-10
2022-04-01 12:25:47	3217913	-8.63761e-11	-7.80858e-11	7.21443e-09	-1.11799e-10	5.14333e-10	-5.59717e-11	-1.56172e-13	7.17836e-09	-1.11687e-10
2022-04-01 12:26:02	3232466	-8.69243e-11	-7.93246e-11	6.89699e-09	-1.17239e-10	4.97739e-10	-5.63269e-11	-1.58649e-13	6.86251e-09	-1.17122e-10
2022-04-01 12:26:16	3246510	-8.69781e-11	-7.22706e-11	6.68513e-09	-1.21894e-10	4.80355e-10	-5.63618e-11	-1.44541e-13	6.6517e-09	-1.21772e-10
2022-04-01 12:26:30	3260553	-8.71608e-11	-8.3041e-11	6.55279e-09	-1.22668e-10	4.70265e-10	-5.64802e-11	-1.66082e-13	6.52003e-09	-1.22545e-10
2022-04-01 12:26:44	3274596	-9.35248e-11	-8.15463e-11	6.4606e-09	-1.12638e-10	4.50754e-10	-6.06041e-11	-1.63093e-13	6.4283e-09	-1.12525e-10
2022-04-01 12:26:58	3288640	-1.03694e-10	-8.68496e-11	6.40266e-09	-1.18679e-10	4.48359e-10	-6.71937e-11	-1.73699e-13	6.37065e-09	-1.1856e-10
2022-04-01 12:27:12	3302683	-9.55888e-11	-7.86079e-11	6.33495e-09	-1.13939e-10	4.29953e-10	-6.19415e-11	-1.57216e-13	6.30328e-09	-1.13825e-10
2022-04-01 12:27:26	3316726	-9.90825e-11	-7.91506e-11	6.2966e-09	-1.20905e-10	4.26275e-10	-6.42055e-11	-1.58301e-13	6.26512e-09	-1.20784e-10
2022-04-01 12:27:40	3330770	-1.00619e-10	-7.49939e-11	6.26576e-09	-1.18894e-10	4.09482e-10	-6.52011e-11	-1.49988e-13	6.23443e-09	-1.18775e-10
2022-04-01 12:27:54	3344813	-9.13641e-11	-7.88127e-11	6.21526e-09	-1.24581e-10	3.99691e-10	-5.92039e-11	-1.57625e-13	6.18418e-09	-1.24456e-10
2022-04-01 12:28:08	3358856	-9.89428e-11	-6.55441e-11	6.1737e-09	-1.18486e-10	3.97703e-10	-6.41149e-11	-1.31088e-13	6.14283e-09	-1.18368e-10
2022-04-01 12:28:22	3372900	-9.26541e-11	-7.40212e-11	6.19733e-09	-1.17905e-10	3.86193e-10	-6.00399e-11	-1.48042e-13	6.16634e-09	-1.17787e-10
2022-04-01 12:28:36	3386943	-8.80423e-11	-7.81882e-11	6.16553e-09	-1.19593e-10	3.85126e-10	-5.70514e-11	-1.56376e-13	6.1347e-09	-1.19473e-10
2022-04-01 12:28:50	3400986	-9.48686e-11	-7.47072e-11	6.13078e-09	-1.16809e-10	3.7813e-10	-6.14749e-11	-1.49414e-13	6.10013e-09	-1.16692e-10
2022-04-01 12:29:05	3415030	-8.99558e-11	-7.06836e-11	6.11634e-09	-1.10079e-10	3.66489e-10	-5.82914e-11	-1.41367e-13	6.08576e-09	-1.09969e-10
2022-04-01 12:29:19	3429073	-9.81151e-11	-7.37346e-11	6.10532e-09	-1.10026e-10	3.66989e-10	-6.35786e-11	-1.47469e-13	6.07479e-09	-1.09916e-10
2022-04-01 12:29:33	3443116	-9.87063e-11	-7.56287e-11	6.09208e-09	-1.19862e-10	3.55071e-10	-6.39617e-11	-1.51257e-13	6.06162e-09	-1.19742e-10
2022-04-01 12:29:47	3457160	-9.42236e-11	-7.0786e-11	6.07698e-09	-1.18679e-10	3.49658e-10	-6.10569e-11	-1.41572e-13	6.0466e-09	-1.1856e-10
2022-04-01 12:30:01	3471203	-9.57393e-11	-7.71234e-11	6.07141e-09	-1.24495e-10	3.44306e-10	-6.20391e-11	-1.54247e-13	6.04105e-09	-1.24371e-10
2022-04-01 12:30:15	3485246	-9.21811e-11	-6.44691e-11	6.05566e-09	-1.14584e-10	3.38049e-10	-5.97334e-11	-1.28938e-13	6.02538e-09	-1.14469e-10
2022-04-01 12:30:29	3499290	-9.8803e-11	-7.62225e-11	6.04167e-09	-1.23442e-10	3.40099e-10	-6.40243e-11	-1.52445e-13	6.01146e-09	-1.23319e-10
2022-04-01 12:30:43	3513333	-9.26648e-11	-6.85439e-11	6.03763e-09	-1.1381e-10	3.41434e-10	-6.00468e-11	-1.37088e-13	6.00744e-09	-1.13696e-10
2022-04-01 12:30:57	3527376	-1.05048e-10	-7.8915e-11	6.03783e-09	-1.1983e-10	3.39069e-10	-6.80711e-11	-1.5783e-13	6.00764e-09	-1.1971e-10
2022-04-01 12:31:11	3541420	-9.63413e-11	-7.76455e-11	6.01912e-09	-1.18163e-10	3.26154e-10	-6.24292e-11	-1.55291e-13	5.98902e-09	-1.18045e-10
2022-04-01 12:31:25	3555463	-9.95233e-11	-7.27006e-11	6.01206e-09	-1.19507e-10	3.26738e-10	-6.44911e-11	-1.45401e-13	5.982e-09	-1.19387e-10
2022-04-01 12:31:39	3569506	-1.00684e-10	-6.83596e-11	6.01614e-09	-1.12767e-10	3.26316e-10	-6.52432e-11	-1.36719e-13	5.98606e-09	-1.12654e-10
2022-04-01 12:31:53	3583550	-1.06478e-10	-7.9253e-11	6.01333e-09	-1.22324e-10	3.26807e-10	-6.89977e-11	-1.58506e-13	5.98326e-09	-1.22202e-10
2022-04-01 12:32:07	3597593	-1.01307e-10	-7.81165e-11	5.99733e-09	-1.22711e-10	3.15896e-10	-6.56469e-11	-1.56233e-13	5.96734e-09	-1.22588e-10
2022-04-01 12:32:21	3611636	-9.31593e-11	-7.88844e-11	5.99835e-09	-1.16433e-10	3.18729e-10	-6.03672e-11	-1.57769e-13	5.96836e-09	-1.16317e-10
2022-04-01 12:32:35	3625680	-1.00877e-10	-7.00591e-11	5.99927e-09	-1.06736e-10	3.15511e-10	-6.53683e-11	-1.40118e-13	5.96927e-09	-1.06629e-10
2022-04-01 12:32:49	3639723	-9.46858e-11	-7.84953e-11	5.98713e-09	-1.28913e-10	3.05284e-10	-6.13564e-11	-1.56991e-13	5.95719e-09	-1.28784e-10
2022-04-01 12:33:03	3653766	-1.10305e-10	-7.58846e-11	6.00103e-09	-1.1854e-10	3.04984e-10	-7.14776e-11	-1.51769e-13	5.97102e-09	-1.18421e-10
2022-04-01 12:33:17	3667810	-9.82118e-11	-7.8311e-11	5.95738e-09	-1.18153e-10	3.03464e-10	-6.36412e-11	-1.56622e-13	5.92759e-09	-1.18035e-10
2022-04-01 12:33:31	3681853	-1.03178e-10	-6.08858e-11	5.97544e-09	-1.16164e-10	3.0599e-10	-6.68593e-11	-1.21772e-13	5.94556e-09	-1.16048e-10
2022-04-01 12:33:45	3695896	-8.83971e-11	-6.34044e-11	5.98289e-09	-1.11187e-10	3.08501e-10	-5.72813e-11	-1.26809e-13	5.95298e-09	-1.11076e-10
2022-04-01 12:33:59	3709940	-9.57178e-11	-6.24727e-11	5.96053e-09	-1.21077e-10	2.98028e-10	-6.20251e-11	-1.24945e-13	5.93073e-09	-1.20956e-10
2022-04-01 12:34:13	3723983	-9.8674e-11	-6.8636e-11	5.9525e-09	-1.19808e-10	2.96008e-10	-6.39408e-11	-1.37272e-13	5.92274e-09	-1.19688e-10
2022-04-01 12:34:28	3738026	-9.46643e-11	-7.20965e-11	5.96998e-09	-1.24517e-10	2.96346e-10	-6.13425e-11	-1.44193e-13	5.94013e-09	-1.24392e-10
2022-04-01 12:34:42	3752070	-1.07188e-10	-7.1175e-11	5.95857e-09	-1.25602e-10	2.94288e-10	-6.94578e-11	-1.4235e-13	5.92878e-09	-1.25476e-10
2022-04-01 12:34:56	3766113	-1.02673e-10	-7.32739e-11	5.94598e-09	-1.25183e-10	2.87408e-10	-6.65321e-11	-1.46548e-13	5.91625e-09	-1.25058e-10
2022-04-01 12:35:10	3780156	-1.02124e-10	-7.26903e-11	5.9379e-09	-1.18765e-10	2.85565e-10	-6.61764e-11	-1.45381e-13	5.90821e-09	-1.18646e-10
2022-04-01 12:35:24	3794200	-1.01458e-10	-8.17612e-11	5.96263e-09	-1.1339e-10	2.8621e-10	-6.57448e-11	-1.63522e-13	5.93282e-09	-1.13277e-10
2022-04-01 12:35:38	3808243	-9.81365e-11	-7.88741e-11	5.96318e-09	-1.20765e-10	2.91854e-10	-6.35925e-11	-1.57748e-13	5.93336e-09	-1.20644e-10
2022-04-01 12:35:52	3822286	-9.32883e-11	-8.07784e-11	6.31919e-09	-1.17518e-10	2.82824e-10	-6.04508e-11	-1.61557e-13	6.28759e-09	-1.174e-10
2022-04-01 12:36:06	3836330	-9.33528e-11	-8.49863e-11	5.30268e-09	-1.2428e-10	2.88376e-10	-6.04926e-11	-1.69973e-13	5.27617e-09	-1.24156e-10
2022-04-01 12:36:20	3850373	-9.88245e-11	-7.70312e-11	5.19033e-09	-1.21249e-10	2.88798e-10	-6.40383e-11	-1.54062e-13	5.16438e-09	-1.21128e-10
2022-04-01 12:36:34	3864416	-8.58601e-11	-7.19634e-11	5.25395e-09	-1.25785e-10	2.80359e-10	-5.56373e-11	-1.43927e-13	5.22768e-09	-1.25659e-10
2022-04-01 12:36:48	3878460	-1.10628e-10	-8.1403e-11	5.46988e-09	-1.12778e-10	2.79944e-10	-7.16869e-11	-1.62806e-13	5.44253e-09	-1.12665e-10
2022-04-01 12:37:02	3892503	-9.98028e-11	-8.12698e-11	5.58987e-09	-1.16572e-10	2.85181e-10	-6.46722e-11	-1.6254e-13	5.56192e-09	-1.16455e-10
2022-04-01 12:37:16	3906546	-9.38043e-11	-9.66371e-11	5.64868e-09	-1.20765e-10	2.77794e-10	-6.07852e-11	-1.93274e-13	5.62044e-09	-1.20644e-10
2022-04-01 12:37:30	3920590	-1.10875e-10	-8.34096e-11	1.50191e-08	-1.16648e-10	3.12609e-10	-7.1847e-11	-1.66819e-13	1.4944e-08	-1.16531e-10
2022-04-01 12:37:45	3935143	-1.00996e-10	-7.73077e-11	1.03199e-07	-1.21743e-10	2.99916e-10	-6.54454e-11	-1.54615e-13	1.02683e-07	-1.21621e-10
2022-04-01 12:37:58	3948917	-1.02382e-10	-7.97341e-11	2.25302e-07	-1.11154e-10	2.64664e-10	-6.63435e-11	-1.59468e-13	2.24175e-07	-1.11043e-10
2022-04-01 12:38:12	3962180	-1.01125e-10	-8.65117e-11	2.97147e-07	-1.22915e-10	2.41029e-10	-6.5529e-11	-1.73023e-13	2.95661e-07	-1.22792e-10
2022-04-01 12:38:25	3975444	-1.01608e-10	-8.46996e-11	3.29038e-07	-1.12713e-10	2.30771e-10	-6.5842e-11	-1.69399e-13	3.27393e-07	-1.126e-10
2022-04-01 12:38:38	3988707	-1.1611e-10	-9.66057e-11	3.53763e-07	-1.04758e-10	2.1824e-10	-7.52393e-11	-1.93211e-13	3.51994e-07	-1.04653e-10
2022-04-01 12:38:51	4001970	-1.19647e-10	-8.70953e-11	3.75891e-07	-1.13853e-10	2.07866e-10	-7.75313e-11	-1.74191e-13	3.74012e-07	-1.13739e-10
2022-04-01 12:39:05	4015233	-1.10617e-10	-9.28593e-11	3.96047e-07	-1.13896e-10	1.91956e-10	-7.16798e-11	-1.85719e-13	3.94067e-07	-1.13782e-10
2022-04-01 12:39:18	4028496	-1.04694e-10	-9.41186e-11	4.03841e-07	-1.17357e-10	1.84078e-10	-6.78417e-11	-1.88237e-13	4.01822e-07	-1.1724e-10
2022-04-01 12:39:31	4041760	-8.30758e-11	-9.99848e-11	4.06438e-07	-1.00877e-10	7.90929e-10	-5.38331e-11	-1.9997e-13	4.04406e-07	-1.00776e-10
2022-04-01 12:39:45	4055023	2.27226e-09	-7.91915e-11	3.88522e-07	-4.43221e-11	2.57526e-09	1.47242e-09	-1.58383e-13	3.86579e-07	-4.42778e-11
2022-04-01 12:40:01	4071537	5.79131e-09	-8.12493e-11	3.57257e-07	-4.29999e-14	3.49426e-09	3.75277e-09	-1.62499e-13	3.55471e-07	-4.29569e-14
2022-04-01 12:40:12	4082590	7.80421e-09	-8.02563e-11	3.63887e-07	3.75066e-11	3.62623e-09	5.05713e-09	-1.60513e-13	3.62068e-07	3.74691e-11
2022-04-01 12:40:24	4094684	9.44846e-09	-7.39496e-11	3.67559e-07	4.04951e-11	3.3934e-09	6.1226e-09	-1.47899e-13	3.65721e-07	4.04546e-11
2022-04-01 12:40:34	4104568	1.04361e-08	-8.18739e-11	3.70695e-07	3.92589e-11	3.05949e-09	6.76259e-09	-1.63748e-13	3.68842e-07	3.92196e-11
2022-04-01 12:40:42	4112880	1.12195e-08	-8.76379e-11	3.71949e-07	2.94119e-11	2.73876e-09	7.27024e-09	-1.75276e-13	3.70089e-07	2.93825e-11
2022-04-01 12:40:51	4121193	1.16153e-08	-8.17715e-11	3.70337e-07	3.04117e-11	2.43336e-09	7.52671e-09	-1.63543e-13	3.68485e-07	3.03813e-11
2022-04-01 12:40:59	4129506	1.20762e-08	-7.14412e-11	3.70605e-07	2.85734e-11	2.16232e-09	7.82538e-09	-1.42882e-13	3.68752e-07	2.85448e-11
2022-04-01 12:41:07	4137820	1.22851e-08	-8.14439e-11	3.70426e-07	2.73802e-11	1.91896e-09	7.96074e-09	-1.62888e-13	3.68574e-07	2.73528e-11
2022-04-01 12:41:16	4146133	1.2568e-08	-8.14439e-11	3.70695e-07	1.85329e-11	1.71676e-09	8.14406e-09	-1.62888e-13	3.68842e-07	1.85144e-11
2022-04-01 12:41:24	4154446	1.27722e-08	-7.27312e-11	3.6962e-07	2.15537e-11	1.56962e-09	8.27639e-09	-1.45462e-13	3.67772e-07	2.15321e-11
2022-04-01 12:41:32	4162759	1.29046e-08	-7.7236e-11	3.70068e-07	1.82857e-11	1.39616e-09	8.36218e-09	-1.54472e-13	3.68218e-07	1.82674e-11
2022-04-01 12:41:41	4171072	1.30262e-08	-7.1216e-11	3.71053e-07	2.01347e-11	1.27974e-09	8.44098e-09	-1.42432e-13	3.69198e-07	2.01146e-11
2022-04-01 12:41:49	4179385	1.25707e-08	-7.07553e-11	3.62812e-07	8.43873e-12	1.18364e-09	8.14581e-09	-1.41511e-13	3.60998e-07	8.43029e-12
2022-04-01 12:41:57	4187698	1.14084e-08	-7.38882e-11	3.70337e-07	-1.69312e-11	9.4035e-10	7.39264e-09	-1.47776e-13	3.68485e-07	-1.69143e-11
2022-04-01 12:42:06	4196522	7.0483e-09	-8.51296e-11	3.19633e-07	-5.03636e-11	7.9025e-10	4.5673e-09	-1.70259e-13	3.18035e-07	-5.03132e-11
2022-04-01 12:42:15	4205365	5.21341e-09	-9.2757e-11	3.1157e-07	-5.75124e-11	6.89672e-10	3.37829e-09	-1.85514e-13	3.10012e-07	-5.74549e-11
2022-04-01 12:42:24	4214208	3.97386e-09	-8.92658e-11	3.09241e-07	-8.22696e-11	6.28398e-10	2.57506e-09	-1.78532e-13	3.07695e-07	-8.21873e-11
2022-04-01 12:42:36	4226302	2.77406e-09	-9.18765e-11	3.10047e-07	-8.21621e-11	5.64681e-10	1.79759e-09	-1.83753e-13	3.08497e-07	-8.20799e-11
2022-04-01 12:42:47	4237355	2.04298e-09	-8.01334e-11	3.18916e-07	-9.26971e-11	5.23378e-10	1.32385e-09	-1.60267e-13	3.17321e-07	-9.26044e-11
2022-04-01 12:42:58	4248409	1.50438e-09	-9.34224e-11	3.30113e-07	-1.00824e-10	4.87811e-10	9.74838e-10	-1.86845e-13	3.28462e-07	-1.00723e-10
2022-04-01 12:43:09	4259462	1.12051e-09	-9.08936e-11	3.38266e-07	-9.50083e-11	4.47337e-10	7.2609e-10	-1.81787e-13	3.36575e-07	-9.49133e-11
2022-04-01 12:43:21	4271556	7.68709e-10	-8.68803e-11	3.47851e-07	-1.06166e-10	4.10181e-10	4.98123e-10	-1.73761e-13	3.46112e-07	-1.0606e-10
2022-04-01 12:43:34	4284819	5.29028e-10	-8.7556e-11	3.52599e-07	-1.0823e-10	3.9705e-10	3.4281e-10	-1.75112e-13	3.50836e-07	-1.08122e-10
2022-04-01 12:43:48	4298082	3.67058e-10	-9.79067e-11	3.53226e-07	-1.02372e-10	3.75159e-10	2.37854e-10	-1.95813e-13	3.5146e-07	-1.0227e-10
2022-04-01 12:44:01	4311345	2.29049e-10	-9.66162e-11	2.94908e-07	-1.17551e-10	4.93792e-10	1.48424e-10	-1.93232e-13	2.93433e-07	-1.17433e-10
2022-04-01 12:44:14	4324608	1.13939e-10	-8.82215e-11	1.94843e-07	-1.16551e-10	6.20957e-10	7.38325e-11	-1.76443e-13	1.93869e-07	-1.16434e-10
2022-04-01 12:44:27	4337872	3.70121e-11	-9.30436e-11	1.24073e-07	-1.12412e-10	6.90164e-10	2.39838e-11	-1.86087e-13	1.23453e-07	-1.123e-10
2022-04-01 12:44:41	4351135	-3.23574e-12	-8.35222e-11	7.91019e-08	-1.20421e-10	7.07633e-10	-2.09676e-12	-1.67044e-13	7.87064e-08	-1.20301e-10
2022-04-01 12:44:54	4364398	-4.26236e-11	-9.03408e-11	4.98687e-08	-1.16906e-10	6.93404e-10	-2.76201e-11	-1.80682e-13	4.96194e-08	-1.16789e-10
2022-04-01 12:45:08	4378172	-5.75231e-11	-7.72974e-11	3.29223e-08	-1.19593e-10	6.72634e-10	-3.7275e-11	-1.54595e-13	3.27577e-08	-1.19473e-10
2022-04-01 12:45:21	4391685	-6.71873e-11	-7.98263e-11	2.27938e-08	-1.28118e-10	6.47916e-10	-4.35374e-11	-1.59653e-13	2.26798e-08	-1.2799e-10
2022-04-01 12:45:35	4405198	-6.79721e-11	-8.07887e-11	1.65129e-08	-1.24732e-10	6.24497e-10	-4.40459e-11	-1.61577e-13	1.64303e-08	-1.24607e-10
2022-04-01 12:45:48	4418711	-8.09581e-11	-8.32868e-11	1.2784e-08	-1.22463e-10	5.97952e-10	-5.24608e-11	-1.66574e-13	1.27201e-08	-1.22341e-10
2022-04-01 12:46:02	4432225	-8.11193e-11	-8.96855e-11	1.04128e-08	-1.24506e-10	5.70018e-10	-5.25653e-11	-1.79371e-13	1.03607e-08	-1.24381e-10
2022-04-01 12:46:15	4445738	-8.08721e-11	-8.71874e-11	8.96383e-09	-1.23764e-10	5.48924e-10	-5.24051e-11	-1.74375e-13	8.91901e-09	-1.2364e-10
2022-04-01 12:46:29	4459251	-8.12268e-11	-8.57234e-11	8.03391e-09	-1.26237e-10	5.28906e-10	-5.2635e-11	-1.71447e-13	7.99374e-09	-1.26111e-10
2022-04-01 12:46:42	4472765	-8.48388e-11	-7.6847e-11	7.38372e-09	-1.20399e-10	5.07967e-10	-5.49755e-11	-1.53694e-13	7.3468e-09	-1.20279e-10
2022-04-01 12:46:57	4487318	-9.26648e-11	-8.78631e-11	7.01596e-09	-1.19249e-10	4.86482e-10	-6.00468e-11	-1.75726e-13	6.98088e-09	-1.1913e-10
2022-04-01 12:47:11	4501362	-8.79133e-11	-7.82906e-11	6.76739e-09	-1.22184e-10	4.74757e-10	-5.69678e-11	-1.56581e-13	6.73355e-09	-1.22062e-10
2022-04-01 12:47:25	4515405	-8.40541e-11	-7.49939e-11	6.63119e-09	-1.25484e-10	4.59561e-10	-5.44671e-11	-1.49988e-13	6.59803e-09	-1.25359e-10
2022-04-01 12:47:39	4529448	-8.66448e-11	-8.22527e-11	6.50324e-09	-1.17529e-10	4.50777e-10	-5.61458e-11	-1.64505e-13	6.47072e-09	-1.17411e-10
2022-04-01 12:47:53	4543492	-8.51828e-11	-8.42389e-11	6.43151e-09	-1.12186e-10	4.38514e-10	-5.51985e-11	-1.68478e-13	6.39935e-09	-1.12074e-10
2022-04-01 12:48:07	4557535	-1.03017e-10	-8.3082e-11	6.35862e-09	-1.21711e-10	4.23265e-10	-6.6755e-11	-1.66164e-13	6.32683e-09	-1.21589e-10
2022-04-01 12:48:21	4571578	-9.93083e-11	-8.49658e-11	6.29977e-09	-1.21109e-10	4.11179e-10	-6.43518e-11	-1.69932e-13	6.26827e-09	-1.20988e-10
2022-04-01 12:48:35	4585622	-9.18801e-11	-8.05941e-11	6.27581e-09	-1.20657e-10	4.00275e-10	-5.95383e-11	-1.61188e-13	6.24443e-09	-1.20536e-10
2022-04-01 12:48:49	4599665	-9.46213e-11	-8.66346e-11	6.24689e-09	-1.23678e-10	3.88704e-10	-6.13146e-11	-1.73269e-13	6.21566e-09	-1.23554e-10
2022-04-01 12:49:03	4613708	-9.37398e-11	-7.95703e-11	6.21799e-09	-1.21517e-10	3.85264e-10	-6.07434e-11	-1.59141e-13	6.1869e-09	-1.21395e-10
2022-04-01 12:49:17	4627752	-1.09499e-10	-8.84365e-11	6.18891e-09	-1.26258e-10	3.71726e-10	-7.09554e-11	-1.76873e-13	6.15797e-09	-1.26132e-10
2022-04-01 12:49:31	4641795	-9.74163e-11	-8.66039e-11	6.159e-09	-1.19733e-10	3.63964e-10	-6.31258e-11	-1.73208e-13	6.1282e-09	-1.19613e-10
2022-04-01 12:49:45	4655838	-8.96441e-11	-8.04815e-11	6.15559e-09	-1.21593e-10	3.59179e-10	-5.80894e-11	-1.60963e-13	6.12481e-09	-1.21471e-10
2022-04-01 12:49:59	4669882	-9.21273e-11	-8.91634e-11	6.14086e-09	-1.22678e-10	3.54749e-10	-5.96985e-11	-1.78327e-13	6.11016e-09	-1.22555e-10
2022-04-01 12:50:13	4683925	-1.04317e-10	-8.16282e-11	6.15052e-09	-1.24549e-10	3.50741e-10	-6.75974e-11	-1.63256e-13	6.11977e-09	-1.24424e-10
2022-04-01 12:50:27	4697968	-9.8717e-11	-7.79527e-11	6.11792e-09	-1.16755e-10	3.50419e-10	-6.39686e-11	-1.55905e-13	6.08733e-09	-1.16638e-10
2022-04-01 12:50:42	4712012	-1.04328e-10	-8.16998e-11	6.11167e-09	-1.12767e-10	3.46134e-10	-6.76045e-11	-1.634e-13	6.08111e-09	-1.12654e-10
2022-04-01 12:50:56	4726055	-9.69433e-11	-8.0891e-11	6.08906e-09	-1.25215e-10	3.40682e-10	-6.28193e-11	-1.61782e-13	6.05861e-09	-1.2509e-10
2022-04-01 12:51:10	4740098	-9.9706e-11	-8.21708e-11	6.08638e-09	-1.26376e-10	3.34731e-10	-6.46095e-11	-1.64342e-13	6.05595e-09	-1.2625e-10
2022-04-01 12:51:24	4754142	-1.01017e-10	-8.76174e-11	6.06554e-09	-1.20829e-10	3.35092e-10	-6.5459e-11	-1.75235e-13	6.03521e-09	-1.20708e-10
2022-04-01 12:51:38	4768185	-1.04285e-10	-8.11982e-11	6.06809e-09	-1.28333e-10	3.23114e-10	-6.75767e-11	-1.62396e-13	6.03775e-09	-1.28205e-10
2022-04-01 12:51:52	4782228	-1.02759e-10	-7.72974e-11	6.056e-09	-1.28763e-10	3.19166e-10	-6.65878e-11	-1.54595e-13	6.02572e-09	-1.28634e-10
2022-04-01 12:52:06	4796272	-1.0206e-10	-7.13901e-11	6.04725e-09	-1.24377e-10	3.26722e-10	-6.61349e-11	-1.4278e-13	6.01701e-09	-1.24253e-10
2022-04-01 12:52:20	4810315	-9.90395e-11	-7.65091e-11	6.01548e-09	-1.12401e-10	3.20687e-10	-6.41776e-11	-1.53018e-13	5.9854e-09	-1.12289e-10
2022-04-01 12:52:34	4824359	-1.12283e-10	-8.73512e-11	6.04665e-09	-1.3087e-10	3.21271e-10	-7.27594e-11	-1.74702e-13	6.01642e-09	-1.30739e-10
2022-04-01 12:52:48	4838402	-9.35248e-11	-7.76046e-11	6.00755e-09	-1.24775e-10	3.14491e-10	-6.06041e-11	-1.55209e-13	5.97751e-09	-1.2465e-10
2022-04-01 12:53:02	4852445	-9.19338e-11	-8.31331e-11	6.01183e-09	-1.2786e-10	3.11389e-10	-5.95731e-11	-1.66266e-13	5.98177e-09	-1.27732e-10
2022-04-01 12:53:16	4866489	-1.03662e-10	-7.97546e-11	6.01696e-09	-1.17217e-10	3.03948e-10	-6.7173e-11	-1.59509e-13	5.98688e-09	-1.171e-10
2022-04-01 12:53:30	4880532	-1.03705e-10	-8.21912e-11	5.98667e-09	-1.21765e-10	2.98949e-10	-6.72008e-11	-1.64382e-13	5.95674e-09	-1.21643e-10
2022-04-01 12:53:44	4894575	-1.03543e-10	-8.42798e-11	5.99402e-09	-1.33342e-10	2.99394e-10	-6.70959e-11	-1.6856e-13	5.96405e-09	-1.33209e-10
2022-04-01 12:53:58	4908618	-1.05908e-10	-9.94219e-11	5.98773e-09	-1.194e-10	2.94089e-10	-6.86284e-11	-1.98844e-13	5.95779e-09	-1.19281e-10
2022-04-01 12:54:12	4922662	-1.06156e-10	-8.89484e-11	5.96282e-09	-1.37535e-10	2.87032e-10	-6.87891e-11	-1.77897e-13	5.93301e-09	-1.37397e-10
2022-04-01 12:54:26	4936705	-1.06166e-10	-9.68105e-11	5.98296e-09	-1.3101e-10	2.88222e-10	-6.87956e-11	-1.93621e-13	5.95305e-09	-1.30879e-10
2022-04-01 12:54:40	4950748	-1.07596e-10	-8.60612e-11	5.97744e-09	-1.26129e-10	2.90257e-10	-6.97222e-11	-1.72122e-13	5.94755e-09	-1.26003e-10
2022-04-01 12:54:54	4964792	-1.05822e-10	-9.33814e-11	5.96413e-09	-1.27914e-10	2.91439e-10	-6.85727e-11	-1.86763e-13	5.93431e-09	-1.27786e-10
2022-04-01 12:55:08	4978835	-9.80828e-11	-8.58258e-11	5.97097e-09	-1.24828e-10	2.84137e-10	-6.35577e-11	-1.71652e-13	5.94112e-09	-1.24703e-10
2022-04-01 12:55:22	4992878	-1.07779e-10	-8.3297e-11	5.94518e-09	-1.20711e-10	2.82616e-10	-6.98408e-11	-1.66594e-13	5.91545e-09	-1.2059e-10
2022-04-01 12:55:36	5006922	-9.80398e-11	-7.9857e-11	5.95602e-09	-1.26118e-10	2.89074e-10	-6.35298e-11	-1.59714e-13	5.92624e-09	-1.25992e-10
2022-04-01 12:55:50	5020965	-9.75131e-11	-7.8393e-11	5.97734e-09	-1.26301e-10	2.87561e-10	-6.31885e-11	-1.56786e-13	5.94745e-09	-1.26175e-10
2022-04-01 12:56:05	5035008	-1.0177e-10	-7.51065e-11	5.9498e-09	-1.15723e-10	2.91301e-10	-6.5947e-11	-1.50213e-13	5.92005e-09	-1.15607e-10
2022-04-01 12:56:19	5049052	-1.07897e-10	-7.89868e-11	5.96256e-09	-1.25409e-10	2.79422e-10	-6.99173e-11	-1.57974e-13	5.93275e-09	-1.25284e-10
2022-04-01 12:56:33	5063095	-1.04296e-10	-7.83008e-11	5.95258e-09	-1.19195e-10	2.81895e-10	-6.75838e-11	-1.56602e-13	5.92282e-09	-1.19076e-10
2022-04-01 12:56:47	5077139	-1.02554e-10	-9.3617e-11	7.12363e-09	-1.37191e-10	2.69394e-10	-6.6455e-11	-1.87234e-13	7.08801e-09	-1.37054e-10
2022-04-01 12:57:01	5091182	-1.11025e-10	-8.37782e-11	5.40518e-09	-1.12036e-10	2.81342e-10	-7.19442e-11	-1.67556e-13	5.37815e-09	-1.11924e-10
2022-04-01 12:57:15	5105225	-1.02028e-10	-7.91096e-11	5.23223e-09	-1.19013e-10	2.88345e-10	-6.61141e-11	-1.58219e-13	5.20607e-09	-1.18894e-10
2022-04-01 12:57:29	5119268	-1.02963e-10	-7.4185e-11	5.20663e-09	-1.18077e-10	2.74286e-10	-6.672e-11	-1.4837e-13	5.1806e-09	-1.17959e-10
2022-04-01 12:57:43	5133312	-9.79645e-11	-8.29591e-11	5.38333e-09	-1.2241e-10	2.82724e-10	-6.3481e-11	-1.65918e-13	5.35641e-09	-1.22288e-10
2022-04-01 12:57:57	5147355	-9.72551e-11	-7.37346e-11	5.55006e-09	-1.16648e-10	2.77871e-10	-6.30213e-11	-1.47469e-13	5.52231e-09	-1.16531e-10
2022-04-01 12:58:11	5161398	-9.01278e-11	-7.35912e-11	5.65632e-09	-1.18314e-10	2.73594e-10	-5.84028e-11	-1.47182e-13	5.62804e-09	-1.18196e-10
2022-04-01 12:58:25	5175442	-9.75023e-11	-7.56901e-11	6.29606e-09	-1.15659e-10	2.89635e-10	-6.31815e-11	-1.5138e-13	6.26458e-09	-1.15543e-10
2022-04-01 12:58:39	5189485	-9.83838e-11	-8.11674e-11	6.31903e-08	-1.1482e-10	2.99801e-10	-6.37527e-11	-1.62335e-13	6.28743e-08	-1.14705e-10
2022-04-01 12:58:54	5204039	-9.86096e-11	-7.93246e-11	2.01382e-07	-1.03382e-10	2.74784e-10	-6.3899e-11	-1.58649e-13	2.00375e-07	-1.03279e-10
2022-04-01 12:59:07	5217813	-1.09015e-10	-9.06889e-11	2.67316e-07	-1.11993e-10	2.52086e-10	-7.06417e-11	-1.81378e-13	2.65979e-07	-1.11881e-10
2022-04-01 12:59:21	5231076	-1.01651e-10	-8.25496e-11	3.22409e-07	-1.07295e-10	2.3008e-10	-6.58698e-11	-1.65099e-13	3.20797e-07	-1.07188e-10
2022-04-01 12:59:34	5244339	-1.09542e-10	-9.00644e-11	3.57437e-07	-1.1209e-10	2.21871e-10	-7.09832e-11	-1.80129e-13	3.5565e-07	-1.11978e-10
2022-04-01 12:59:47	5257602	-1.13724e-10	-9.13953e-11	3.80549e-07	-1.15422e-10	2.09624e-10	-7.36932e-11	-1.82791e-13	3.78646e-07	-1.15307e-10
2022-04-01 13:00:00	5270865	-1.0737e-10	-9.76505e-11	3.94255e-07	-1.19539e-10	1.98137e-10	-6.95758e-11	-1.95301e-13	3.92284e-07	-1.19419e-10
2022-04-01 13:00:14	5284129	-1.12692e-10	-9.12417e-11	4.03303e-07	-1.13218e-10	1.86166e-10	-7.30244e-11	-1.82483e-13	4.01286e-07	-1.13105e-10
2022-04-01 13:00:27	5297392	-9.90288e-11	-9.25112e-11	4.09842e-07	-1.18282e-10	3.73454e-10	-6.41707e-11	-1.85022e-13	4.07793e-07	-1.18164e-10
2022-04-01 13:00:40	5310655	1.0477e-09	-8.97879e-11	3.90941e-07	-6.91653e-11	2.01099e-09	6.7891e-10	-1.79576e-13	3.88986e-07	-6.90961e-11
2022-04-01 13:00:53	5323918	4.93523e-09	-7.3796e-11	3.53674e-07	-8.64298e-12	3.12561e-09	3.19803e-09	-1.47592e-13	3.51906e-07	-8.63434e-12
2022-04-01 13:01:10	5340432	7.52431e-09	-7.22706e-11	3.62363e-07	2.72512e-11	3.52271e-09	4.87575e-09	-1.44541e-13	3.60551e-07	2.72239e-11
2022-04-01 13:01:21	5351485	9.01494e-09	-7.89458e-11	3.65768e-07	3.03794e-11	3.35716e-09	5.84168e-09	-1.57892e-13	3.63939e-07	3.0349e-11
2022-04-01 13:01:33	5363579	1.03495e-08	-7.40315e-11	3.69709e-07	4.26881e-11	2.97622e-09	6.70648e-09	-1.48063e-13	3.6786e-07	4.26454e-11
2022-04-01 13:01:44	5374102	1.12391e-08	-7.09806e-11	3.70784e-07	4.12369e-11	2.59219e-09	7.28294e-09	-1.41961e-13	3.6893e-07	4.11957e-11
2022-04-01 13:01:54	5384626	1.18303e-08	-8.63991e-11	3.70337e-07	2.67782e-11	2.22089e-09	7.66603e-09	-1.72798e-13	3.68485e-07	2.67514e-11
2022-04-01 13:02:05	5395149	1.21675e-08	-7.48812e-11	3.69172e-07	2.22847e-11	1.91151e-09	7.88454e-09	-1.49762e-13	3.67326e-07	2.22624e-11
2022-04-01 13:02:15	5405672	1.25088e-08	-7.05608e-11	3.6953e-07	2.28974e-11	1.66233e-09	8.1057e-09	-1.41122e-13	3.67682e-07	2.28745e-11
2022-04-01 13:02:26	5416195	1.28347e-08	-6.90558e-11	3.69351e-07	1.81352e-11	1.45386e-09	8.31689e-09	-1.38112e-13	3.67504e-07	1.81171e-11
2022-04-01 13:02:36	5426718	1.2908e-08	-7.77377e-11	3.68276e-07	1.28569e-11	1.28346e-09	8.36438e-09	-1.55475e-13	3.66435e-07	1.2844e-11
2022-04-01 13:02:47	5437241	1.27433e-08	-7.39496e-11	3.70337e-07	1.57594e-11	1.13827e-09	8.25766e-09	-1.47899e-13	3.68485e-07	1.57436e-11
2022-04-01 13:02:57	5447765	1.13956e-08	-8.51603e-11	3.67738e-07	-2.14247e-11	8.73264e-10	7.38435e-09	-1.70321e-13	3.65899e-07	-2.14033e-11
2022-04-01 13:03:08	5458798	6.48843e-09	-8.52115e-11	3.13362e-07	-4.87726e-11	7.34729e-10	4.2045e-09	-1.70423e-13	3.11795e-07	-4.87238e-11
2022-04-01 13:03:19	5469851	4.53521e-09	-8.30206e-11	3.07628e-07	-6.15221e-11	6.38518e-10	2.93882e-09	-1.66041e-13	3.0609e-07	-6.14606e-11
2022-04-01 13:03:30	5480905	3.28745e-09	-7.58641e-11	3.0718e-07	-7.43253e-11	5.84514e-10	2.13027e-09	-1.51728e-13	3.05644e-07	-7.4251e-11
2022-04-01 13:03:41	5491958	2.37488e-09	-8.25189e-11	3.13003e-07	-6.69938e-11	5.34144e-10	1.53892e-09	-1.65038e-13	3.11438e-07	-6.69268e-11
2022-04-01 13:03:53	5503011	1.79898e-09	-8.24574e-11	3.23395e-07	-8.99881e-11	4.91635e-10	1.16574e-09	-1.64915e-13	3.21778e-07	-8.98981e-11
2022-04-01 13:04:04	5514065	1.31742e-09	-8.74025e-11	3.33608e-07	-9.9921e-11	4.59554e-10	8.53688e-10	-1.74805e-13	3.3194e-07	-9.98211e-11
2022-04-01 13:04:15	5525118	9.75367e-10	-9.74971e-11	3.42297e-07	-1.00007e-10	4.2682e-10	6.32038e-10	-1.94994e-13	3.40586e-07	-9.9907e-11
2022-04-01 13:04:27	5537211	6.64521e-10	-8.8242e-11	3.48926e-07	-1.12799e-10	3.99408e-10	4.3061e-10	-1.76484e-13	3.47181e-07	-1.12686e-10
2022-04-01 13:04:40	5550475	4.44436e-10	-7.03663e-11	3.52778e-07	-1.02243e-10	3.77171e-10	2.87995e-10	-1.40733e-13	3.51014e-07	-1.02141e-10
2022-04-01 13:04:53	5563738	3.12125e-10	-8.84263e-11	3.42208e-07	-1.0178e-10	4.13774e-10	2.02257e-10	-1.76853e-13	3.40497e-07	-1.01678e-10
2022-04-01 13:05:07	5577001	1.73698e-10	-8.51398e-11	2.49399e-07	-1.07478e-10	5.60726e-10	1.12556e-10	-1.7028e-13	2.48152e-07	-1.07371e-10
2022-04-01 13:05:20	5590264	8.15816e-11	-8.21298e-11	1.6107e-07	-1.18206e-10	6.59972e-10	5.28649e-11	-1.6426e-13	1.60265e-07	-1.18088e-10
2022-04-01 13:05:33	5603527	1.98767e-11	-7.44512e-11	1.01856e-07	-1.19647e-10	7.03356e-10	1.28801e-11	-1.48902e-13	1.01347e-07	-1.19527e-10
2022-04-01 13:05:46	5616791	-9.02998e-12	-7.5383e-11	6.34601e-08	-1.141e-10	7.00983e-10	-5.85143e-12	-1.50766e-13	6.31428e-08	-1.13986e-10
2022-04-01 13:06:00	5630564	-4.19141e-11	-8.3256e-11	4.12843e-08	-1.15691e-10	6.83645e-10	-2.71603e-11	-1.66512e-13	4.10779e-08	-1.15575e-10
2022-04-01 13:06:14	5644078	-5.95441e-11	-8.2396e-11	2.77914e-08	-1.24603e-10	6.54804e-10	-3.85846e-11	-1.64792e-13	2.76524e-08	-1.24478e-10
2022-04-01 13:06:27	5657591	-8.39466e-11	-7.40315e-11	1.96197e-08	-1.19937e-10	6.34441e-10	-5.43974e-11	-1.48063e-13	1.95216e-08	-1.19817e-10
2022-04-01 13:06:41	5671104	-7.89693e-11	-8.15974e-11	1.46401e-08	-1.21937e-10	6.06583e-10	-5.11721e-11	-1.63195e-13	1.45669e-08	-1.21815e-10
2022-04-01 13:06:54	5684617	-8.05818e-11	-8.33482e-11	1.15461e-08	-1.2371e-10	5.8271e-10	-5.2217e-11	-1.66696e-13	1.14884e-08	-1.23586e-10
2022-04-01 13:07:08	5698131	-9.10631e-11	-7.77991e-11	9.6715e-09	-1.16701e-10	5.53286e-10	-5.90089e-11	-1.55598e-13	9.62314e-09	-1.16584e-10
2022-04-01 13:07:21	5711644	-9.14501e-11	-9.00541e-11	8.47167e-09	-1.2227e-10	5.28868e-10	-5.92597e-11	-1.80108e-13	8.42931e-09	-1.22148e-10
2022-04-01 13:07:35	5725157	-9.76528e-11	-7.61098e-11	7.74894e-09	-1.15809e-10	5.05571e-10	-6.3279e-11	-1.5222e-13	7.7102e-09	-1.15693e-10
2022-04-01 13:07:48	5738671	-9.68896e-11	-7.56287e-11	7.23483e-09	-1.18163e-10	4.88594e-10	-6.27845e-11	-1.51257e-13	7.19866e-09	-1.18045e-10
2022-04-01 13:08:03	5753225	-9.52556e-11	-8.61944e-11	6.90968e-09	-1.20088e-10	4.75556e-10	-6.17256e-11	-1.72389e-13	6.87513e-09	-1.19968e-10
2022-04-01 13:08:17	5767268	-8.97623e-11	-7.52806e-11	6.69383e-09	-1.14885e-10	4.59216e-10	-5.8166e-11	-1.50561e-13	6.66036e-09	-1.1477e-10
2022-04-01 13:08:31	5781311	-1.01555e-10	-9.03408e-11	6.55687e-09	-1.29053e-10	4.47053e-10	-6.58076e-11	-1.80682e-13	6.52409e-09	-1.28924e-10
2022-04-01 13:08:45	5795355	-9.06653e-11	-9.55105e-11	6.46256e-09	-1.26065e-10	4.3347e-10	-5.87511e-11	-1.91021e-13	6.43025e-09	-1.25939e-10
2022-04-01 13:08:59	5809398	-9.97813e-11	-8.12698e-11	6.38883e-09	-1.20238e-10	4.20171e-10	-6.46583e-11	-1.6254e-13	6.35689e-09	-1.20118e-10
2022-04-01 13:09:13	5823441	-1.17443e-10	-8.91531e-11	6.35108e-09	-1.1726e-10	4.13321e-10	-7.61031e-11	-1.78306e-13	6.31932e-09	-1.17143e-10
2022-04-01 13:09:27	5837485	-9.31163e-11	-8.27544e-11	6.28653e-09	-1.24044e-10	3.98309e-10	-6.03394e-11	-1.65509e-13	6.2551e-09	-1.2392e-10
2022-04-01 13:09:41	5851528	-9.56318e-11	-8.36553e-11	6.25038e-09	-1.18572e-10	3.86054e-10	-6.19694e-11	-1.67311e-13	6.21913e-09	-1.18453e-10
2022-04-01 13:09:55	5865571	-1.03371e-10	-8.76993e-11	6.23319e-09	-1.2657e-10	3.83068e-10	-6.69844e-11	-1.75399e-13	6.20202e-09	-1.26443e-10
2022-04-01 13:10:09	5879615	-9.62231e-11	-8.70339e-11	6.21418e-09	-1.22829e-10	3.7512e-10	-6.23526e-11	-1.74068e-13	6.18311e-09	-1.22706e-10
2022-04-01 13:10:23	5893658	-1.01759e-10	-8.18125e-11	6.18684e-09	-1.31837e-10	3.67534e-10	-6.59398e-11	-1.63625e-13	6.15591e-09	-1.31705e-10
2022-04-01 13:10:37	5907701	-9.83623e-11	-8.1792e-11	6.19889e-09	-1.24033e-10	3.62343e-10	-6.37388e-11	-1.63584e-13	6.1679e-09	-1.23909e-10
2022-04-01 13:10:51	5921745	-9.99855e-11	-9.17331e-11	6.14586e-09	-1.2385e-10	3.53152e-10	-6.47906e-11	-1.83466e-13	6.11513e-09	-1.23726e-10
2022-04-01 13:11:05	5935788	-9.74593e-11	-9.20403e-11	6.11463e-09	-1.21034e-10	3.41772e-10	-6.31536e-11	-1.84081e-13	6.08406e-09	-1.20913e-10
2022-04-01 13:11:19	5949831	-9.72228e-11	-9.19379e-11	6.11488e-09	-1.16508e-10	3.41174e-10	-6.30004e-11	-1.83876e-13	6.08431e-09	-1.16391e-10
2022-04-01 13:11:33	5963874	-1.08574e-10	-7.52806e-11	6.1032e-09	-1.20958e-10	3.47884e-10	-7.0356e-11	-1.50561e-13	6.07268e-09	-1.20837e-10
2022-04-01 13:11:47	5977918	-9.79753e-11	-7.59255e-11	6.09998e-09	-1.21894e-10	3.31629e-10	-6.3488e-11	-1.51851e-13	6.06948e-09	-1.21772e-10
2022-04-01 13:12:01	5991961	-1.08478e-10	-7.9345e-11	6.05953e-09	-1.25226e-10	3.27106e-10	-7.02937e-11	-1.5869e-13	6.02923e-09	-1.25101e-10
2022-04-01 13:12:16	6006004	-1.02673e-10	-7.93246e-11	6.06196e-09	-1.24775e-10	3.25978e-10	-6.65321e-11	-1.58649e-13	6.03165e-09	-1.2465e-10
2022-04-01 13:12:30	6020048	-1.03812e-10	-7.94474e-11	6.06033e-09	-1.2356e-10	3.16456e-10	-6.72702e-11	-1.58895e-13	6.03003e-09	-1.23436e-10
2022-04-01 13:12:44	6034091	-1.08123e-10	-8.43515e-11	6.02588e-09	-1.2829e-10	3.16449e-10	-7.00637e-11	-1.68703e-13	5.99575e-09	-1.28162e-10
2022-04-01 13:12:58	6048134	-1.11455e-10	-7.38268e-11	6.03868e-09	-1.14637e-10	3.14636e-10	-7.22228e-11	-1.47654e-13	6.00849e-09	-1.14522e-10
2022-04-01 13:13:12	6062178	-9.70938e-11	-8.19353e-11	6.02213e-09	-1.31375e-10	3.16295e-10	-6.29168e-11	-1.63871e-13	5.99202e-09	-1.31244e-10
2022-04-01 13:13:26	6076221	-1.08316e-10	-7.74408e-11	6.01551e-09	-1.22582e-10	3.11549e-10	-7.01888e-11	-1.54882e-13	5.98543e-09	-1.22459e-10
2022-04-01 13:13:40	6090264	-9.80398e-11	-7.01103e-11	6.02536e-09	-1.20883e-10	3.05369e-10	-6.35298e-11	-1.40221e-13	5.99523e-09	-1.20762e-10
2022-04-01 13:13:54	6104308	-9.47933e-11	-8.3942e-11	6.01533e-09	-1.14928e-10	3.05031e-10	-6.14261e-11	-1.67884e-13	5.98525e-09	-1.14813e-10
2022-04-01 13:14:08	6118351	-1.02135e-10	-8.30717e-11	5.99368e-09	-1.17637e-10	3.09054e-10	-6.61835e-11	-1.66143e-13	5.96371e-09	-1.17519e-10
2022-04-01 13:14:22	6132394	-1.04586e-10	-7.58027e-11	5.98777e-09	-1.22582e-10	2.98066e-10	-6.77717e-11	-1.51605e-13	5.95783e-09	-1.22459e-10
2022-04-01 13:14:36	6146437	-9.12351e-11	-7.95703e-11	6.00648e-09	-1.16637e-10	2.96653e-10	-5.91203e-11	-1.59141e-13	5.97645e-09	-1.1652e-10
2022-04-01 13:14:50	6160481	-1.03318e-10	-8.82522e-11	5.97996e-09	-1.21206e-10	2.95639e-10	-6.69501e-11	-1.76504e-13	5.95006e-09	-1.21085e-10
2022-04-01 13:15:04	6174524	-1.00168e-10	-8.45972e-11	5.97579e-09	-1.16422e-10	2.8469e-10	-6.49089e-11	-1.69194e-13	5.94591e-09	-1.16306e-10
2022-04-01 13:15:18	6188568	-8.97301e-11	-7.8782e-11	5.98919e-09	-1.23915e-10	2.82056e-10	-5.81451e-11	-1.57564e-13	5.95924e-09	-1.23791e-10
2022-04-01 13:15:32	6202611	-9.90611e-11	-7.74817e-11	5.97108e-09	-1.26097e-10	2.84936e-10	-6.41916e-11	-1.54963e-13	5.94122e-09	-1.25971e-10
2022-04-01 13:15:46	6216654	-1.07145e-10	-8.83034e-11	5.93992e-09	-1.14078e-10	2.77503e-10	-6.943e-11	-1.76607e-13	5.91022e-09	-1.13964e-10
2022-04-01 13:16:00	6230698	-9.79645e-11	-8.44231e-11	5.95056e-09	-1.23624e-10	2.82217e-10	-6.3481e-11	-1.68846e-13	5.92081e-09	-1.235e-10
2022-04-01 13:16:14	6244741	-9.40731e-11	-7.65501e-11	5.94765e-09	-1.1726e-10	2.79054e-10	-6.09594e-11	-1.531e-13	5.91791e-09	-1.17143e-10
2022-04-01 13:16:28	6258784	-1.04199e-10	-8.2222e-11	5.94527e-09	-1.20496e-10	2.79937e-10	-6.7521e-11	-1.64444e-13	5.91554e-09	-1.20376e-10
2022-04-01 13:16:42	6272828	-1.10918e-10	-8.08808e-11	5.95098e-09	-1.30967e-10	2.72327e-10	-7.18749e-11	-1.61762e-13	5.92123e-09	-1.30836e-10
2022-04-01 13:16:56	6286871	-1.08736e-10	-8.51808e-11	5.92158e-09	-1.27742e-10	2.68956e-10	-7.04609e-11	-1.70362e-13	5.89197e-09	-1.27614e-10
2022-04-01 13:17:10	6300914	-1.08015e-10	-8.71772e-11	5.9131e-09	-1.3216e-10	2.74016e-10	-6.99937e-11	-1.74354e-13	5.88353e-09	-1.32028e-10
2022-04-01 13:17:24	6314957	-9.95985e-11	-8.50272e-11	5.91804e-09	-1.22958e-10	2.69586e-10	-6.45398e-11	-1.70054e-13	5.88845e-09	-1.22835e-10
2022-04-01 13:17:39	6329001	-9.32561e-11	-9.28287e-11	5.93497e-09	-1.23001e-10	2.68872e-10	-6.043e-11	-1.85657e-13	5.9053e-09	-1.22878e-10
2022-04-01 13:17:53	6343044	-9.50943e-11	-8.32355e-11	6.29785e-09	-1.32138e-10	2.70093e-10	-6.16211e-11	-1.66471e-13	6.26636e-09	-1.32006e-10
2022-04-01 13:18:07	6357087	-1.03038e-10	-8.58053e-11	5.287e-09	-1.2528e-10	2.64188e-10	-6.67686e-11	-1.71611e-13	5.26056e-09	-1.25155e-10
2022-04-01 13:18:21	6371131	-1.10767e-10	-7.9857e-11	5.18704e-09	-1.31558e-10	2.75015e-10	-7.1777e-11	-1.59714e-13	5.1611e-09	-1.31426e-10
2022-04-01 13:18:35	6385174	-1.04468e-10	-6.27184e-11	5.26874e-09	-1.29945e-10	2.68235e-10	-6.76953e-11	-1.25437e-13	5.2424e-09	-1.29815e-10
2022-04-01 13:18:49	6399218	-1.05769e-10	-8.37577e-11	5.44918e-09	-1.25334e-10	2.63451e-10	-6.85383e-11	-1.67515e-13	5.42193e-09	-1.25209e-10
2022-04-01 13:19:03	6413261	-1.07026e-10	-7.57106e-11	5.58083e-09	-1.19679e-10	2.62238e-10	-6.93528e-11	-1.51421e-13	5.55293e-09	-1.19559e-10
2022-04-01 13:19:17	6427304	-1.06596e-10	-8.17612e-11	5.64883e-09	-1.21163e-10	2.63942e-10	-6.90742e-11	-1.63522e-13	5.62059e-09	-1.21042e-10
2022-04-01 13:19:31	6441348	-1.0909e-10	-8.11368e-11	1.76148e-08	-1.20851e-10	2.96861e-10	-7.06903e-11	-1.62274e-13	1.75267e-08	-1.2073e-10
2022-04-01 13:19:45	6455901	-1.05726e-10	-8.46791e-11	1.09202e-07	-1.194e-10	2.91954e-10	-6.85104e-11	-1.69358e-13	1.08656e-07	-1.19281e-10
2022-04-01 13:19:59	6469675	-1.09746e-10	-9.44667e-11	2.30139e-07	-1.07822e-10	2.45606e-10	-7.11154e-11	-1.88933e-13	2.28988e-07	-1.07714e-10
2022-04-01 13:20:12	6482938	-1.20561e-10	-8.64912e-11	3.02163e-07	-1.2155e-10	2.24129e-10	-7.81235e-11	-1.72982e-13	3.00652e-07	-1.21428e-10
2022-04-01 13:20:26	6496201	-1.16454e-10	-9.10677e-11	3.32174e-07	-1.12079e-10	2.13064e-10	-7.54622e-11	-1.82135e-13	3.30513e-07	-1.11967e-10
2022-04-01 13:20:39	6509465	-1.1812e-10	-8.96446e-11	3.56541e-07	-1.30408e-10	1.95557e-10	-7.65418e-11	-1.79289e-13	3.54758e-07	-1.30278e-10
2022-04-01 13:20:52	6522728	-1.17991e-10	-9.94933e-11	3.71859e-07	-1.25441e-10	1.93338e-10	-7.64582e-11	-1.98987e-13	3.7e-07	-1.25316e-10
2022-04-01 13:21:05	6535991	-1.0421e-10	-9.77219e-11	3.93091e-07	-1.13337e-10	1.84784e-10	-6.75281e-11	-1.95444e-13	3.91126e-07	-1.13224e-10
2022-04-01 13:21:19	6549254	-1.12735e-10	-1.0105e-10	4.02945e-07	-1.15659e-10	1.76046e-10	-7.30523e-11	-2.021e-13	4.0093e-07	-1.15543e-10
2022-04-01 13:21:32	6562517	-5.84476e-11	-9.95543e-11	4.05722e-07	-1.06661e-10	8.11386e-10	-3.7874e-11	-1.99109e-13	4.03693e-07	-1.06554e-10
2022-04-01 13:21:45	6575781	2.47185e-09	-9.53267e-11	3.87537e-07	-3.92374e-11	2.46373e-09	1.60176e-09	-1.90653e-13	3.85599e-07	-3.91982e-11
2022-04-01 13:22:02	6592295	5.91555e-09	-7.90891e-11	3.58153e-07	-9.02998e-12	3.33213e-09	3.83328e-09	-1.58178e-13	3.56362e-07	-9.02095e-12
2022-04-01 13:22:13	6603348	7.87697e-09	-8.95115e-11	3.62722e-07	1.99089e-11	3.44108e-09	5.10428e-09	-1.79023e-13	3.60908e-07	1.9889e-11
2022-04-01 13:22:24	6614401	9.35721e-09	-8.36655e-11	3.66574e-07	4.15486e-11	3.21904e-09	6.06347e-09	-1.67331e-13	3.64741e-07	4.15071e-11
2022-04-01 13:22:36	6626495	1.05792e-08	-7.1175e-11	3.68992e-07	4.33869e-11	2.82702e-09	6.85532e-09	-1.4235e-13	3.67147e-07	4.33435e-11
2022-04-01 13:22:47	6637018	1.13466e-08	-8.25598e-11	3.6953e-07	3.11857e-11	2.43923e-09	7.3526e-09	-1.6512e-13	3.67682e-07	3.11545e-11
2022-04-01 13:22:57	6647541	1.18773e-08	-8.33993e-11	3.68187e-07	2.98634e-11	2.09273e-09	7.69649e-09	-1.66799e-13	3.66346e-07	2.98335e-11
2022-04-01 13:23:08	6658065	1.222e-08	-7.94372e-11	3.68008e-07	1.40072e-11	1.80529e-09	7.91856e-09	-1.58874e-13	3.66168e-07	1.39932e-11
2022-04-01 13:23:18	6668587	1.25115e-08	-7.70722e-11	3.66395e-07	8.87948e-12	1.56551e-09	8.10745e-09	-1.54144e-13	3.64563e-07	8.8706e-12
2022-04-01 13:23:29	6679111	1.27668e-08	-8.08501e-11	3.66305e-07	1.25667e-11	1.37396e-09	8.27289e-09	-1.617e-13	3.64473e-07	1.25541e-11
2022-04-01 13:23:39	6689634	1.29577e-08	-7.87512e-11	3.6747e-07	1.50607e-11	1.21979e-09	8.39659e-09	-1.57502e-13	3.65633e-07	1.50456e-11
2022-04-01 13:23:50	6700157	1.22899e-08	-8.43925e-11	3.55913e-07	1.09649e-12	1.11051e-09	7.96386e-09	-1.68785e-13	3.54133e-07	1.09539e-12
2022-04-01 13:24:00	6710680	9.98942e-09	-7.8567e-11	3.39162e-07	-3.83021e-11	8.13443e-10	6.47314e-09	-1.57134e-13	3.37466e-07	-3.82638e-11
2022-04-01 13:24:11	6721714	5.85808e-09	-8.82522e-11	3.1157e-07	-5.74586e-11	6.90394e-10	3.79604e-09	-1.76504e-13	3.10012e-07	-5.74011e-11
2022-04-01 13:24:22	6732767	4.14718e-09	-8.65527e-11	3.07359e-07	-6.70798e-11	6.06038e-10	2.68737e-09	-1.73105e-13	3.05822e-07	-6.70127e-11
2022-04-01 13:24:33	6743820	2.96549e-09	-1.02401e-10	3.06463e-07	-7.91736e-11	5.50537e-10	1.92164e-09	-2.04802e-13	3.04931e-07	-7.90944e-11
2022-04-01 13:24:44	6754873	2.19201e-09	-8.46074e-11	3.15063e-07	-8.15708e-11	5.08934e-10	1.42042e-09	-1.69215e-13	3.13488e-07	-8.14892e-11
2022-04-01 13:24:55	6765926	1.61719e-09	-7.93655e-11	3.25366e-07	-9.56211e-11	4.70143e-10	1.04794e-09	-1.58731e-13	3.23739e-07	-9.55255e-11
2022-04-01 13:25:06	6776980	1.20883e-09	-7.91812e-11	3.34772e-07	-9.15898e-11	4.43483e-10	7.83322e-10	-1.58362e-13	3.33098e-07	-9.14982e-11
2022-04-01 13:25:19	6789074	8.34273e-10	-8.66346e-11	3.44357e-07	-1.06209e-10	4.06264e-10	5.40609e-10	-1.73269e-13	3.42635e-07	-1.06103e-10
2022-04-01 13:25:32	6802337	5.81842e-10	-8.72079e-11	3.50628e-07	-9.9362e-11	3.77478e-10	3.77034e-10	-1.74416e-13	3.48875e-07	-9.92626e-11
2022-04-01 13:25:45	6815600	3.82839e-10	-8.88665e-11	3.53763e-07	-1.15583e-10	3.53981e-10	2.4808e-10	-1.77733e-13	3.51994e-07	-1.15467e-10
2022-04-01 13:25:58	6828863	2.61557e-10	-8.06146e-11	3.13988e-07	-1.16443e-10	4.54248e-10	1.69489e-10	-1.61229e-13	3.12418e-07	-1.16327e-10
2022-04-01 13:26:12	6842126	1.39255e-10	-8.15155e-11	2.12849e-07	-1.14035e-10	5.84599e-10	9.02372e-11	-1.63031e-13	2.11785e-07	-1.13921e-10
2022-04-01 13:26:25	6855390	5.97591e-11	-8.54368e-11	1.35628e-07	-1.04221e-10	6.55449e-10	3.87239e-11	-1.70874e-13	1.3495e-07	-1.04117e-10
2022-04-01 13:26:38	6868653	9.88998e-13	-9.07401e-11	8.61783e-08	-1.23721e-10	6.9054e-10	6.40871e-13	-1.8148e-13	8.57474e-08	-1.23597e-10
2022-04-01 13:26:51	6881916	-1.81674e-11	-8.20991e-11	5.40052e-08	-1.18056e-10	6.78884e-10	-1.17725e-11	-1.64198e-13	5.37352e-08	-1.17938e-10
2022-04-01 13:27:05	6895690	-5.96624e-11	-8.9747e-11	3.55521e-08	-1.11047e-10	6.61369e-10	-3.86612e-11	-1.79494e-13	3.53743e-08	-1.10936e-10
2022-04-01 13:27:19	6909203	-5.90711e-11	-8.3215e-11	2.43363e-08	-1.14121e-10	6.34333e-10	-3.82781e-11	-1.6643e-13	2.42146e-08	-1.14007e-10
2022-04-01 13:27:32	6922717	-6.55963e-11	-9.66267e-11	1.74832e-08	-1.18497e-10	6.10576e-10	-4.25064e-11	-1.93253e-13	1.73958e-08	-1.18379e-10
2022-04-01 13:27:46	6936230	-8.11301e-11	-8.24063e-11	1.33355e-08	-1.20636e-10	5.87133e-10	-5.25723e-11	-1.64813e-13	1.32688e-08	-1.20515e-10
2022-04-01 13:27:59	6949743	-8.10333e-11	-8.30717e-11	1.07045e-08	-1.27247e-10	5.61341e-10	-5.25096e-11	-1.66143e-13	1.0651e-08	-1.2712e-10
2022-04-01 13:28:13	6963256	-8.22266e-11	-8.2263e-11	9.19058e-09	-1.18056e-10	5.35088e-10	-5.32828e-11	-1.64526e-13	9.14463e-09	-1.17938e-10
2022-04-01 13:28:26	6976770	-8.31833e-11	-8.16998e-11	8.15314e-09	-1.17078e-10	5.13012e-10	-5.39028e-11	-1.634e-13	8.11237e-09	-1.16961e-10
2022-04-01 13:28:40	6990283	-8.69028e-11	-6.54008e-11	7.54066e-09	-1.21593e-10	5.01732e-10	-5.6313e-11	-1.30802e-13	7.50296e-09	-1.21471e-10
2022-04-01 13:28:53	7003796	-8.33768e-11	-7.80449e-11	7.10448e-09	-1.16873e-10	4.78074e-10	-5.40282e-11	-1.5609e-13	7.06896e-09	-1.16756e-10
2022-04-01 13:29:08	7018350	-8.66771e-11	-7.30077e-11	6.8205e-09	-1.23495e-10	4.58924e-10	-5.61668e-11	-1.46015e-13	6.7864e-09	-1.23372e-10
2022-04-01 13:29:22	7032394	-8.79993e-11	-7.76865e-11	6.64425e-09	-1.24506e-10	4.48619e-10	-5.70235e-11	-1.55373e-13	6.61103e-09	-1.24381e-10
2022-04-01 13:29:36	7046437	-1.01307e-10	-8.34403e-11	6.52231e-09	-1.22377e-10	4.38315e-10	-6.56469e-11	-1.66881e-13	6.4897e-09	-1.22255e-10
2022-04-01 13:29:50	7060480	-9.50728e-11	-7.81984e-11	6.4345e-09	-1.17766e-10	4.19226e-10	-6.16072e-11	-1.56397e-13	6.40233e-09	-1.17648e-10
2022-04-01 13:30:04	7074524	-8.74618e-11	-8.26622e-11	6.37542e-09	-1.15788e-10	4.09067e-10	-5.66752e-11	-1.65324e-13	6.34354e-09	-1.15672e-10
2022-04-01 13:30:18	7088567	-8.75263e-11	-7.45639e-11	6.32799e-09	-1.26043e-10	4.00651e-10	-5.6717e-11	-1.49128e-13	6.29635e-09	-1.25917e-10
2022-04-01 13:30:32	7102610	-1.05898e-10	-8.12187e-11	6.27992e-09	-1.19797e-10	3.8726e-10	-6.86219e-11	-1.62437e-13	6.24852e-09	-1.19677e-10
2022-04-01 13:30:46	7116653	-9.59651e-11	-8.25393e-11	6.23913e-09	-1.3173e-10	3.73984e-10	-6.21854e-11	-1.65079e-13	6.20793e-09	-1.31598e-10
2022-04-01 13:31:00	7130697	-8.91603e-11	-8.49555e-11	6.23124e-09	-1.13197e-10	3.6652e-10	-5.77759e-11	-1.69911e-13	6.20008e-09	-1.13084e-10
2022-04-01 13:31:14	7144740	-8.46668e-11	-8.63991e-11	6.18042e-09	-1.22969e-10	3.66382e-10	-5.48641e-11	-1.72798e-13	6.14952e-09	-1.22846e-10
2022-04-01 13:31:28	7158784	-9.16113e-11	-7.93246e-11	6.18669e-09	-1.28913e-10	3.57467e-10	-5.93641e-11	-1.58649e-13	6.15576e-09	-1.28784e-10
2022-04-01 13:31:42	7172827	-9.56748e-11	-8.17715e-11	6.14795e-09	-1.31956e-10	3.57721e-10	-6.19973e-11	-1.63543e-13	6.11721e-09	-1.31824e-10
2022-04-01 13:31:56	7186870	-8.57418e-11	-8.08808e-11	6.15463e-09	-1.19346e-10	3.48652e-10	-5.55607e-11	-1.61762e-13	6.12386e-09	-1.19227e-10
2022-04-01 13:32:10	7200913	-1.01942e-10	-7.43079e-11	6.13752e-09	-1.1998e-10	3.41066e-10	-6.60584e-11	-1.48616e-13	6.10683e-09	-1.1986e-10
2022-04-01 13:32:24	7214957	-9.73303e-11	-7.73998e-11	6.12402e-09	-1.23452e-10	3.30201e-10	-6.307e-11	-1.548e-13	6.0934e-09	-1.23329e-10
2022-04-01 13:32:39	7229000	-9.74915e-11	-6.88715e-11	6.10464e-09	-1.19647e-10	3.31145e-10	-6.31745e-11	-1.37743e-13	6.07412e-09	-1.19527e-10
2022-04-01 13:32:53	7243044	-9.72981e-11	-7.31101e-11	6.08572e-09	-1.16379e-10	3.23029e-10	-6.30492e-11	-1.4622e-13	6.05529e-09	-1.16263e-10
2022-04-01 13:33:07	7257087	-1.05833e-10	-8.20684e-11	6.06788e-09	-1.24173e-10	3.19067e-10	-6.85798e-11	-1.64137e-13	6.03754e-09	-1.24049e-10
2022-04-01 13:33:21	7271130	-9.80721e-11	-7.24036e-11	6.06167e-09	-1.18249e-10	3.09116e-10	-6.35507e-11	-1.44807e-13	6.03136e-09	-1.18131e-10
2022-04-01 13:33:35	7285173	-1.00877e-10	-8.58258e-11	6.04711e-09	-1.16325e-10	3.09231e-10	-6.53683e-11	-1.71652e-13	6.01687e-09	-1.16209e-10
2022-04-01 13:33:49	7299217	-9.77388e-11	-7.85465e-11	6.03861e-09	-1.26742e-10	3.06481e-10	-6.33347e-11	-1.57093e-13	6.00842e-09	-1.26615e-10
2022-04-01 13:34:03	7313260	-9.47181e-11	-7.71644e-11	6.03605e-09	-1.24087e-10	3.05437e-10	-6.13773e-11	-1.54329e-13	6.00587e-09	-1.23963e-10
2022-04-01 13:34:17	7327303	-9.60296e-11	-7.78606e-11	6.01781e-09	-1.21292e-10	2.93812e-10	-6.22272e-11	-1.55721e-13	5.98772e-09	-1.21171e-10
2022-04-01 13:34:31	7341347	-9.73195e-11	-6.98031e-11	6.02694e-09	-1.12391e-10	2.93643e-10	-6.3063e-11	-1.39606e-13	5.99681e-09	-1.12279e-10
2022-04-01 13:34:45	7355390	-1.06704e-10	-8.14541e-11	6.04262e-09	-1.17873e-10	2.99202e-10	-6.91442e-11	-1.62908e-13	6.01241e-09	-1.17755e-10
2022-04-01 13:34:59	7369433	-9.40516e-11	-8.1403e-11	6.01563e-09	-1.20055e-10	2.93943e-10	-6.09454e-11	-1.62806e-13	5.98555e-09	-1.19935e-10
2022-04-01 13:35:13	7383476	-9.6137e-11	-7.94372e-11	6.0115e-09	-1.23614e-10	2.91132e-10	-6.22968e-11	-1.58874e-13	5.98144e-09	-1.2349e-10
2022-04-01 13:35:27	7397520	-9.54168e-11	-8.0246e-11	5.99698e-09	-1.12982e-10	2.9481e-10	-6.18301e-11	-1.60492e-13	5.967e-09	-1.12869e-10
2022-04-01 13:35:41	7411563	-1.02554e-10	-7.9601e-11	5.97396e-09	-1.17196e-10	2.82609e-10	-6.6455e-11	-1.59202e-13	5.94409e-09	-1.17079e-10
2022-04-01 13:35:55	7425606	-1.03404e-10	-7.48608e-11	5.98551e-09	-1.18636e-10	2.82401e-10	-6.70058e-11	-1.49722e-13	5.95558e-09	-1.18517e-10
2022-04-01 13:36:09	7439650	-1.02189e-10	-8.02255e-11	5.96998e-09	-1.10778e-10	2.84053e-10	-6.62185e-11	-1.60451e-13	5.94013e-09	-1.10667e-10
2022-04-01 13:36:23	7453693	-9.90288e-11	-7.66115e-11	5.98182e-09	-1.31257e-10	2.86464e-10	-6.41707e-11	-1.53223e-13	5.95191e-09	-1.31126e-10
2022-04-01 13:36:37	7467736	-1.01415e-10	-8.30717e-11	5.97488e-09	-1.26484e-10	2.85059e-10	-6.57169e-11	-1.66143e-13	5.94501e-09	-1.26358e-10
2022-04-01 13:36:51	7481780	-9.78463e-11	-6.80115e-11	5.96343e-09	-1.18153e-10	2.80874e-10	-6.34044e-11	-1.36023e-13	5.93361e-09	-1.18035e-10
2022-04-01 13:37:05	7495823	-1.00125e-10	-7.04891e-11	5.97535e-09	-1.14702e-10	2.77196e-10	-6.4881e-11	-1.40978e-13	5.94547e-09	-1.14587e-10
2022-04-01 13:37:19	7509866	-1.0593e-10	-7.75534e-11	5.94146e-09	-1.25162e-10	2.73111e-10	-6.86426e-11	-1.55107e-13	5.91175e-09	-1.25037e-10
2022-04-01 13:37:33	7523910	-1.08961e-10	-7.84134e-11	5.94588e-09	-1.31676e-10	2.7136e-10	-7.06067e-11	-1.56827e-13	5.91615e-09	-1.31544e-10
2022-04-01 13:37:47	7537953	-1.15723e-10	-8.4802e-11	5.93188e-09	-1.25086e-10	2.70009e-10	-7.49885e-11	-1.69604e-13	5.90222e-09	-1.24961e-10
2022-04-01 13:38:01	7551996	-9.72981e-11	-6.48582e-11	5.95127e-09	-1.25678e-10	2.70754e-10	-6.30492e-11	-1.29716e-13	5.92151e-09	-1.25552e-10
2022-04-01 13:38:16	7566040	-9.91578e-11	-7.2762e-11	5.92532e-09	-1.19002e-10	2.70116e-10	-6.42543e-11	-1.45524e-13	5.89569e-09	-1.18883e-10
2022-04-01 13:38:30	7580083	-1.01049e-10	-7.7881e-11	5.92185e-09	-1.21464e-10	2.67551e-10	-6.54798e-11	-1.55762e-13	5.89224e-09	-1.21343e-10
2022-04-01 13:38:44	7594126	-1.08048e-10	-8.39317e-11	5.9316e-09	-1.3531e-10	2.57546e-10	-7.00151e-11	-1.67863e-13	5.90194e-09	-1.35175e-10
2022-04-01 13:38:58	7608170	-9.91685e-11	-8.16589e-11	5.55933e-09	-1.26613e-10	2.65379e-10	-6.42612e-11	-1.63318e-13	5.53153e-09	-1.26486e-10
2022-04-01 13:39:12	7622213	-1.00447e-10	-8.57336e-11	5.25678e-09	-1.25624e-10	2.61554e-10	-6.50897e-11	-1.71467e-13	5.2305e-09	-1.25498e-10
2022-04-01 13:39:26	7636256	-1.0765e-10	-8.36349e-11	5.18098e-09	-1.31268e-10	2.57516e-10	-6.97572e-11	-1.6727e-13	5.15508e-09	-1.31137e-10
2022-04-01 13:39:40	7650300	-1.10079e-10	-8.20172e-11	5.35173e-09	-1.37288e-10	2.61693e-10	-7.13312e-11	-1.64034e-13	5.32497e-09	-1.37151e-10
2022-04-01 13:39:54	7664343	-9.91793e-11	-7.87512e-11	5.52431e-09	-1.16476e-10	2.5912e-10	-6.42682e-11	-1.57502e-13	5.49669e-09	-1.1636e-10
2022-04-01 13:40:08	7678386	-1.11681e-10	-8.53139e-11	5.59697e-09	-1.28473e-10	2.62261e-10	-7.23693e-11	-1.70628e-13	5.56899e-09	-1.28345e-10
2022-04-01 13:40:22	7692430	-1.00211e-10	-8.37372e-11	5.71806e-09	-1.25581e-10	2.62737e-10	-6.49367e-11	-1.67474e-13	5.68947e-09	-1.25455e-10
2022-04-01 13:40:36	7706473	-1.08983e-10	-9.39549e-11	4.28476e-08	-1.19883e-10	2.81196e-10	-7.0621e-11	-1.8791e-13	4.26334e-08	-1.19763e-10
2022-04-01 13:40:51	7721026	-1.04371e-10	-9.66267e-11	1.82123e-07	-1.20636e-10	2.64741e-10	-6.76324e-11	-1.93253e-13	1.81212e-07	-1.20515e-10
2022-04-01 13:41:04	7734800	-1.0134e-10	-8.35836e-11	2.60418e-07	-1.03597e-10	2.39394e-10	-6.56683e-11	-1.67167e-13	2.59116e-07	-1.03493e-10
2022-04-01 13:41:18	7748064	-9.98888e-11	-9.24703e-11	3.17483e-07	-1.2227e-10	2.20329e-10	-6.47279e-11	-1.84941e-13	3.15896e-07	-1.22148e-10
2022-04-01 13:41:31	7761327	-1.11455e-10	-9.56333e-11	3.53316e-07	-1.24097e-10	2.07951e-10	-7.22228e-11	-1.91267e-13	3.51549e-07	-1.23973e-10
2022-04-01 13:41:44	7774590	-1.02812e-10	-9.06274e-11	3.77055e-07	-1.14014e-10	1.96456e-10	-6.66222e-11	-1.81255e-13	3.7517e-07	-1.139e-10
2022-04-01 13:41:57	7787853	-1.02726e-10	-9.06991e-11	3.93897e-07	-1.19185e-10	1.87264e-10	-6.65664e-11	-1.81398e-13	3.91928e-07	-1.19066e-10
2022-04-01 13:42:11	7801116	-1.12885e-10	-8.26622e-11	3.96137e-07	-1.02425e-10	1.72752e-10	-7.31495e-11	-1.65324e-13	3.94156e-07	-1.02323e-10
2022-04-01 13:42:24	7814380	-1.04726e-10	-9.61352e-11	3.93718e-07	-1.29515e-10	2.25358e-10	-6.78624e-11	-1.9227e-13	3.91749e-07	-1.29385e-10
2022-04-01 13:42:37	7827643	4.44716e-10	-9.21222e-11	3.85208e-07	-8.73866e-11	1.50139e-09	2.88176e-10	-1.84244e-13	3.83282e-07	-8.72992e-11
2022-04-01 13:42:50	7840906	4.1449e-09	-8.40341e-11	3.69262e-07	-3.40989e-11	2.74895e-09	2.6859e-09	-1.68068e-13	3.67416e-07	-3.40648e-11
2022-04-01 13:43:07	7857420	6.97426e-09	-8.9102e-11	3.6102e-07	4.51499e-12	3.36992e-09	4.51932e-09	-1.78204e-13	3.59215e-07	4.51048e-12
2022-04-01 13:43:18	7868473	8.61555e-09	-8.30206e-11	3.63797e-07	2.63374e-11	3.29084e-09	5.58288e-09	-1.66041e-13	3.61978e-07	2.63111e-11
2022-04-01 13:43:29	7879527	9.90292e-09	-7.36731e-11	3.67828e-07	3.38731e-11	2.99924e-09	6.41709e-09	-1.47346e-13	3.65989e-07	3.38392e-11
2022-04-01 13:43:41	7891620	1.10394e-08	-8.23141e-11	3.69799e-07	3.45074e-11	2.59599e-09	7.15353e-09	-1.64628e-13	3.6795e-07	3.44729e-11
2022-04-01 13:43:52	7902144	1.16387e-08	-6.90046e-11	3.68634e-07	4.18711e-11	2.22301e-09	7.54188e-09	-1.38009e-13	3.66791e-07	4.18292e-11
2022-04-01 13:44:02	7912667	1.20271e-08	-7.20965e-11	3.66574e-07	2.59182e-11	1.90674e-09	7.79356e-09	-1.44193e-13	3.64741e-07	2.58923e-11
2022-04-01 13:44:13	7923190	1.23685e-08	-8.15565e-11	3.66216e-07	2.47679e-11	1.65452e-09	8.01479e-09	-1.63113e-13	3.64385e-07	2.47431e-11
2022-04-01 13:44:23	7933713	1.26083e-08	-7.10931e-11	3.66126e-07	1.98229e-11	1.43687e-09	8.17018e-09	-1.42186e-13	3.64295e-07	1.98031e-11
2022-04-01 13:44:34	7944236	1.28098e-08	-7.82087e-11	3.67201e-07	3.39484e-11	1.27076e-09	8.30075e-09	-1.56417e-13	3.65365e-07	3.39145e-11
2022-04-01 13:44:44	7954760	1.292e-08	-8.10958e-11	3.67559e-07	-5.03099e-12	1.0904e-09	8.37216e-09	-1.62192e-13	3.65721e-07	-5.02596e-12
2022-04-01 13:44:55	7965283	1.11907e-08	-7.6765e-11	4.03393e-07	-1.18249e-11	8.90721e-10	7.25157e-09	-1.5353e-13	4.01376e-07	-1.18131e-11
2022-04-01 13:45:06	7976316	7.06135e-09	-8.34096e-11	3.17213e-07	-4.86974e-11	7.14871e-10	4.57575e-09	-1.66819e-13	3.15627e-07	-4.86487e-11
2022-04-01 13:45:17	7987370	4.83391e-09	-8.6737e-11	3.07359e-07	-6.75851e-11	6.29234e-10	3.13237e-09	-1.73474e-13	3.05822e-07	-6.75175e-11
2022-04-01 13:45:28	7998423	3.47299e-09	-8.85491e-11	3.06733e-07	-8.50216e-11	5.62055e-10	2.2505e-09	-1.77098e-13	3.05199e-07	-8.49366e-11
2022-04-01 13:45:39	8009476	2.52335e-09	-7.7881e-11	3.09599e-07	-8.37208e-11	5.11276e-10	1.63513e-09	-1.55762e-13	3.08051e-07	-8.36371e-11
2022-04-01 13:45:50	8020529	1.85614e-09	-8.2396e-11	3.19184e-07	-1.00394e-10	4.78543e-10	1.20278e-09	-1.64792e-13	3.17588e-07	-1.00294e-10
2022-04-01 13:46:01	8031582	1.38929e-09	-8.37577e-11	3.29755e-07	-9.48363e-11	4.47759e-10	9.0026e-10	-1.67515e-13	3.28106e-07	-9.47415e-11
2022-04-01 13:46:12	8042636	1.0272e-09	-8.69417e-11	3.39788e-07	-1.10778e-10	4.10196e-10	6.65626e-10	-1.73883e-13	3.38089e-07	-1.10667e-10
2022-04-01 13:46:24	8054730	7.11079e-10	-8.48634e-11	3.47493e-07	-1.0736e-10	3.84027e-10	4.60779e-10	-1.69727e-13	3.45756e-07	-1.07253e-10
2022-04-01 13:46:37	8067993	4.76202e-10	-8.75663e-11	3.51166e-07	-9.59973e-11	3.59879e-10	3.08579e-10	-1.75133e-13	3.4941e-07	-9.59013e-11
2022-04-01 13:46:51	8081256	3.34302e-10	-8.83955e-11	3.47583e-07	-1.09026e-10	3.71089e-10	2.16628e-10	-1.76791e-13	3.45845e-07	-1.08917e-10
2022-04-01 13:47:04	8094519	2.09861e-10	-9.04227e-11	2.70183e-07	-1.15293e-10	5.04066e-10	1.3599e-10	-1.80845e-13	2.68832e-07	-1.15178e-10
2022-04-01 13:47:17	8107782	9.33313e-11	-8.48122e-11	1.75493e-07	-1.04489e-10	6.10184e-10	6.04787e-11	-1.69624e-13	1.74616e-07	-1.04385e-10
2022-04-01 13:47:31	8121045	2.81219e-11	-8.75253e-11	1.10993e-07	-1.19873e-10	6.70154e-10	1.8223e-11	-1.75051e-13	1.10438e-07	-1.19753e-10
2022-04-01 13:47:44	8134309	-3.71949e-12	-8.14131e-11	6.8947e-08	-1.08768e-10	6.76749e-10	-2.41023e-12	-1.62826e-13	6.86023e-08	-1.08659e-10
2022-04-01 13:47:58	8148082	-4.18066e-11	-8.50477e-11	4.45188e-08	-1.15992e-10	6.57999e-10	-2.70907e-11	-1.70095e-13	4.42962e-08	-1.15876e-10
2022-04-01 13:48:11	8161596	-5.10516e-11	-8.27544e-11	2.97511e-08	-1.10703e-10	6.44315e-10	-3.30814e-11	-1.65509e-13	2.96023e-08	-1.10592e-10
2022-04-01 13:48:25	8175109	-6.90041e-11	-8.4413e-11	2.07564e-08	-1.25086e-10	6.19191e-10	-4.47147e-11	-1.68826e-13	2.06526e-08	-1.24961e-10
2022-04-01 13:48:38	8188622	-7.37233e-11	-8.60817e-11	1.53948e-08	-1.1425e-10	5.96808e-10	-4.77727e-11	-1.72163e-13	1.53178e-08	-1.14136e-10
2022-04-01 13:48:52	8202135	-7.18313e-11	-8.33584e-11	1.19604e-08	-1.2858e-10	5.71676e-10	-4.65467e-11	-1.66717e-13	1.19006e-08	-1.28451e-10
2022-04-01 13:49:05	8215649	-7.51853e-11	-8.08706e-11	9.90342e-09	-1.14508e-10	5.41139e-10	-4.87201e-11	-1.61741e-13	9.8539e-09	-1.14393e-10
2022-04-01 13:49:19	8229162	-8.95903e-11	-7.27927e-11	8.647e-09	-1.18991e-10	5.21711e-10	-5.80545e-11	-1.45585e-13	8.60377e-09	-1.18872e-10
2022-04-01 13:49:32	8242675	-7.14873e-11	-7.75022e-11	7.88162e-09	-1.1582e-10	4.98292e-10	-4.63238e-11	-1.55004e-13	7.84221e-09	-1.15704e-10
2022-04-01 13:49:46	8256189	-8.54193e-11	-8.53549e-11	7.27713e-09	-1.2026e-10	4.8434e-10	-5.53517e-11	-1.7071e-13	7.24074e-09	-1.2014e-10
2022-04-01 13:50:00	8270743	-7.80341e-11	-6.98953e-11	6.94064e-09	-1.15626e-10	4.61297e-10	-5.05661e-11	-1.39791e-13	6.90594e-09	-1.1551e-10
2022-04-01 13:50:14	8284786	-8.85583e-11	-8.15155e-11	6.73365e-09	-1.28688e-10	4.43022e-10	-5.73858e-11	-1.63031e-13	6.69998e-09	-1.28559e-10
2022-04-01 13:50:28	8298829	-8.23663e-11	-8.04098e-11	6.58778e-09	-1.164e-10	4.3059e-10	-5.33734e-11	-1.6082e-13	6.55484e-09	-1.16284e-10
2022-04-01 13:50:42	8312872	-1.00813e-10	-7.87206e-11	6.48409e-09	-1.23538e-10	4.21844e-10	-6.53268e-11	-1.57441e-13	6.45167e-09	-1.23414e-10
2022-04-01 13:50:56	8326916	-9.27078e-11	-8.05839e-11	6.40437e-09	-1.16207e-10	4.08783e-10	-6.00747e-11	-1.61168e-13	6.37235e-09	-1.16091e-10
2022-04-01 13:51:10	8340959	-8.88701e-11	-7.05812e-11	6.37235e-09	-1.24484e-10	3.95084e-10	-5.75878e-11	-1.41162e-13	6.34049e-09	-1.2436e-10
2022-04-01 13:51:25	8355002	-9.49868e-11	-9.04125e-11	6.31614e-09	-1.19711e-10	3.86631e-10	-6.15514e-11	-1.80825e-13	6.28456e-09	-1.19591e-10
2022-04-01 13:51:39	8369046	-1.03328e-10	-8.42696e-11	6.26419e-09	-1.2614e-10	3.70974e-10	-6.69565e-11	-1.68539e-13	6.23287e-09	-1.26014e-10
2022-04-01 13:51:53	8383089	-1.065e-10	-8.97572e-11	6.23073e-09	-1.27838e-10	3.69284e-10	-6.9012e-11	-1.79514e-13	6.19958e-09	-1.2771e-10
2022-04-01 13:52:07	8397132	-9.32023e-11	-7.7963e-11	6.20918e-09	-1.19013e-10	3.58381e-10	-6.03951e-11	-1.55926e-13	6.17813e-09	-1.18894e-10
2022-04-01 13:52:21	8411176	-9.38258e-11	-8.35734e-11	6.18341e-09	-1.23775e-10	3.49758e-10	-6.07991e-11	-1.67147e-13	6.15249e-09	-1.23651e-10
2022-04-01 13:52:35	8425219	-8.86121e-11	-7.16153e-11	6.17464e-09	-1.19045e-10	3.55747e-10	-5.74206e-11	-1.43231e-13	6.14377e-09	-1.18926e-10
2022-04-01 13:52:49	8439262	-9.87493e-11	-8.08603e-11	6.16434e-09	-1.16615e-10	3.41119e-10	-6.39895e-11	-1.61721e-13	6.13352e-09	-1.16498e-10
2022-04-01 13:53:03	8453305	-9.62553e-11	-7.62225e-11	6.13293e-09	-1.08435e-10	3.36151e-10	-6.23734e-11	-1.52445e-13	6.10227e-09	-1.08327e-10
2022-04-01 13:53:17	8467349	-8.91281e-11	-7.56491e-11	6.13e-09	-1.1596e-10	3.24964e-10	-5.7755e-11	-1.51298e-13	6.09935e-09	-1.15844e-10
2022-04-01 13:53:31	8481392	-9.17833e-11	-8.61636e-11	6.10233e-09	-1.2241e-10	3.23996e-10	-5.94756e-11	-1.72327e-13	6.07182e-09	-1.22288e-10
2022-04-01 13:53:45	8495436	-1.02135e-10	-8.04303e-11	6.10256e-09	-1.24302e-10	3.19689e-10	-6.61835e-11	-1.60861e-13	6.07205e-09	-1.24178e-10
2022-04-01 13:53:59	8509479	-8.00336e-11	-8.3297e-11	6.07015e-09	-1.15863e-10	3.08494e-10	-5.18618e-11	-1.66594e-13	6.0398e-09	-1.15747e-10
2022-04-01 13:54:13	8523522	-9.64381e-11	-7.2547e-11	6.05287e-09	-1.2915e-10	3.09569e-10	-6.24919e-11	-1.45094e-13	6.02261e-09	-1.29021e-10
2022-04-01 13:54:27	8537565	-1.05392e-10	-7.99696e-11	6.03463e-09	-1.25194e-10	3.03894e-10	-6.8294e-11	-1.59939e-13	6.00446e-09	-1.25069e-10
2022-04-01 13:54:41	8551609	-9.38581e-11	-7.74101e-11	6.03738e-09	-1.2614e-10	3.04232e-10	-6.082e-11	-1.5482e-13	6.00719e-09	-1.26014e-10
2022-04-01 13:54:55	8565652	-1.04898e-10	-8.03382e-11	6.04792e-09	-1.174e-10	2.92307e-10	-6.79739e-11	-1.60676e-13	6.01768e-09	-1.17283e-10
2022-04-01 13:55:09	8579695	-1.08037e-10	-7.90277e-11	6.02361e-09	-1.26161e-10	2.90595e-10	-7.0008e-11	-1.58055e-13	5.99349e-09	-1.26035e-10
2022-04-01 13:55:23	8593738	-9.11598e-11	-7.7195e-11	6.03575e-09	-1.2184e-10	2.94096e-10	-5.90716e-11	-1.5439e-13	6.00557e-09	-1.21718e-10
2022-04-01 13:55:37	8607782	-1.11541e-10	-7.96727e-11	6.00787e-09	-1.23743e-10	2.92936e-10	-7.22786e-11	-1.59345e-13	5.97783e-09	-1.23619e-10
2022-04-01 13:55:51	8621825	-9.84375e-11	-8.16691e-11	6.01482e-09	-1.23775e-10	2.82264e-10	-6.37875e-11	-1.63338e-13	5.98475e-09	-1.23651e-10
2022-04-01 13:56:05	8635868	-1.04145e-10	-8.5232e-11	5.99729e-09	-1.34052e-10	2.97582e-10	-6.7486e-11	-1.70464e-13	5.9673e-09	-1.33918e-10
2022-04-01 13:56:19	8649912	-1.1195e-10	-8.46893e-11	5.99798e-09	-1.15207e-10	2.83239e-10	-7.25436e-11	-1.69379e-13	5.96799e-09	-1.15092e-10
2022-04-01 13:56:33	8663955	-9.46858e-11	-8.38191e-11	5.98316e-09	-1.3101e-10	2.78762e-10	-6.13564e-11	-1.67638e-13	5.95324e-09	-1.30879e-10
2022-04-01 13:56:47	8677998	-1.00447e-10	-7.28644e-11	5.97107e-09	-1.12627e-10	2.73756e-10	-6.50897e-11	-1.45729e-13	5.94121e-09	-1.12514e-10
2022-04-01 13:57:02	8692042	-9.86096e-11	-8.9276e-11	5.98901e-09	-1.25387e-10	2.72112e-10	-6.3899e-11	-1.78552e-13	5.95906e-09	-1.25262e-10
2022-04-01 13:57:16	8706085	-1.08392e-10	-8.07579e-11	5.96148e-09	-1.20399e-10	2.79653e-10	-7.0238e-11	-1.61516e-13	5.93167e-09	-1.20279e-10
2022-04-01 13:57:30	8720128	-9.99963e-11	-8.45153e-11	5.96539e-09	-1.28053e-10	2.75099e-10	-6.47976e-11	-1.69031e-13	5.93556e-09	-1.27925e-10
2022-04-01 13:57:44	8734172	-1.07456e-10	-8.43925e-11	5.9534e-09	-1.2141e-10	2.70101e-10	-6.96315e-11	-1.68785e-13	5.92363e-09	-1.21289e-10
2022-04-01 13:57:58	8748215	-1.09305e-10	-8.42184e-11	5.98005e-09	-1.30977e-10	2.67382e-10	-7.08296e-11	-1.68437e-13	5.95015e-09	-1.30846e-10
2022-04-01 13:58:12	8762258	-9.66853e-11	-7.35298e-11	5.96339e-09	-1.23388e-10	2.60786e-10	-6.26521e-11	-1.4706e-13	5.93357e-09	-1.23265e-10
2022-04-01 13:58:26	8776302	-1.16099e-10	-8.41468e-11	5.95619e-09	-1.28473e-10	2.6329e-10	-7.52322e-11	-1.68294e-13	5.92641e-09	-1.28345e-10
2022-04-01 13:58:40	8790345	-1.10004e-10	-8.39625e-11	5.95563e-09	-1.2413e-10	2.70324e-10	-7.12826e-11	-1.67925e-13	5.92585e-09	-1.24006e-10
2022-04-01 13:58:54	8804388	-1.03006e-10	-8.27646e-11	5.92768e-09	-1.25817e-10	2.59865e-10	-6.67479e-11	-1.65529e-13	5.89804e-09	-1.25691e-10
2022-04-01 13:59:08	8818432	-1.10585e-10	-8.4331e-11	5.93238e-09	-1.33278e-10	2.53454e-10	-7.16591e-11	-1.68662e-13	5.90272e-09	-1.33145e-10
2022-04-01 13:59:22	8832475	-1.18271e-10	-8.93477e-11	5.9275e-09	-1.19722e-10	2.50958e-10	-7.66396e-11	-1.78695e-13	5.89786e-09	-1.19602e-10
2022-04-01 13:59:36	8846518	-1.11219e-10	-9.2757e-11	5.93934e-09	-1.2442e-10	2.55895e-10	-7.20699e-11	-1.85514e-13	5.90964e-09	-1.24296e-10
2022-04-01 13:59:50	8860561	-1.05382e-10	-7.89765e-11	6.41763e-09	-1.23786e-10	2.56241e-10	-6.82875e-11	-1.57953e-13	6.38554e-09	-1.23662e-10
2022-04-01 14:00:04	8874605	-1.02393e-10	-7.9253e-11	5.34212e-09	-1.27398e-10	2.56379e-10	-6.63507e-11	-1.58506e-13	5.31541e-09	-1.27271e-10
2022-04-01 14:00:18	8888648	-9.9233e-11	-8.30615e-11	5.18898e-09	-1.26882e-10	2.54298e-10	-6.4303e-11	-1.66123e-13	5.16304e-09	-1.26755e-10
2022-04-01 14:00:32	8902691	-1.02791e-10	-8.2785e-11	5.22504e-09	-1.23538e-10	2.55227e-10	-6.66086e-11	-1.6557e-13	5.19891e-09	-1.23414e-10
2022-04-01 14:00:46	8916735	-1.01211e-10	-8.4372e-11	5.41897e-09	-1.29634e-10	2.5396e-10	-6.55847e-11	-1.68744e-13	5.39188e-09	-1.29504e-10
2022-04-01 14:01:00	8930778	-1.02694e-10	-7.41441e-11	5.53682e-09	-1.12788e-10	2.61493e-10	-6.65457e-11	-1.48288e-13	5.50914e-09	-1.12675e-10
2022-04-01 14:01:14	8944821	-1.04242e-10	-7.73589e-11	5.62739e-09	-1.22678e-10	2.52946e-10	-6.75488e-11	-1.54718e-13	5.59925e-09	-1.22555e-10
2022-04-01 14:01:28	8958865	-9.61908e-11	-7.49836e-11	1.05002e-08	-1.23538e-10	2.67175e-10	-6.23316e-11	-1.49967e-13	1.04477e-08	-1.23414e-10
2022-04-01 14:01:43	8973418	-1.10789e-10	-7.98877e-11	8.87767e-08	-1.22506e-10	2.80221e-10	-7.17913e-11	-1.59775e-13	8.83328e-08	-1.22383e-10
2022-04-01 14:01:57	8987192	-1.08521e-10	-8.9143e-11	2.14014e-07	-1.22463e-10	2.46934e-10	-7.03216e-11	-1.78286e-13	2.12944e-07	-1.22341e-10
2022-04-01 14:02:10	9000456	-1.17336e-10	-9.48046e-11	2.80037e-07	-1.18217e-10	2.13771e-10	-7.60337e-11	-1.89609e-13	2.78637e-07	-1.18099e-10
2022-04-01 14:02:23	9013719	-1.14369e-10	-9.96981e-11	3.21872e-07	-1.11617e-10	2.18232e-10	-7.41111e-11	-1.99396e-13	3.20263e-07	-1.11505e-10
2022-04-01 14:02:36	9026982	-1.20238e-10	-8.55187e-11	3.58333e-07	-1.19185e-10	1.92516e-10	-7.79142e-11	-1.71037e-13	3.56541e-07	-1.19066e-10
2022-04-01 14:02:50	9040245	-1.12079e-10	-8.56825e-11	3.82699e-07	-1.14777e-10	1.86144e-10	-7.26272e-11	-1.71365e-13	3.80786e-07	-1.14662e-10
2022-04-01 14:03:03	9053508	-1.18669e-10	-1.00056e-10	3.95509e-07	-1.20432e-10	1.73581e-10	-7.68975e-11	-2.00112e-13	3.93531e-07	-1.20312e-10
2022-04-01 14:03:16	9066772	-1.18368e-10	-9.61248e-11	4.03841e-07	-1.17787e-10	1.66747e-10	-7.67025e-11	-1.9225e-13	4.01822e-07	-1.17669e-10
2022-04-01 14:03:30	9080035	-1.01329e-10	-9.52346e-11	4.09216e-07	-1.18034e-10	5.47089e-10	-6.56612e-11	-1.90469e-13	4.0717e-07	-1.17916e-10
2022-04-01 14:03:43	9093298	1.73089e-09	-9.54695e-11	3.9103e-07	-7.03156e-11	2.20831e-09	1.12162e-09	-1.90939e-13	3.89075e-07	-7.02453e-11
2022-04-01 14:03:59	9109812	5.43271e-09	-8.96855e-11	3.55645e-07	-2.42734e-11	3.13713e-09	3.5204e-09	-1.79371e-13	3.53867e-07	-2.42491e-11
2022-04-01 14:04:10	9120865	7.54228e-09	-9.07606e-11	3.61826e-07	2.37252e-11	3.34589e-09	4.8874e-09	-1.81521e-13	3.60017e-07	2.37015e-11
2022-04-01 14:04:21	9131919	9.07624e-09	-8.26315e-11	3.65409e-07	1.80277e-11	3.19196e-09	5.8814e-09	-1.65263e-13	3.63582e-07	1.80097e-11
2022-04-01 14:04:34	9144013	1.04039e-08	-8.38498e-11	3.69441e-07	2.96269e-11	2.82562e-09	6.74173e-09	-1.677e-13	3.67594e-07	2.95973e-11
2022-04-01 14:04:44	9154536	1.12639e-08	-8.14644e-11	3.69083e-07	2.50367e-11	2.45112e-09	7.29901e-09	-1.62929e-13	3.67238e-07	2.50117e-11
2022-04-01 14:04:55	9165059	1.17839e-08	-8.0205e-11	3.68008e-07	2.49077e-11	2.09663e-09	7.63597e-09	-1.6041e-13	3.66168e-07	2.48828e-11
2022-04-01 14:05:05	9175582	1.20943e-08	-9.17127e-11	3.6738e-07	2.62514e-11	1.80012e-09	7.83711e-09	-1.83425e-13	3.65543e-07	2.62251e-11
2022-04-01 14:05:16	9186105	1.24793e-08	-8.19455e-11	3.66484e-07	1.46307e-11	1.55796e-09	8.08659e-09	-1.63891e-13	3.64652e-07	1.46161e-11
2022-04-01 14:05:26	9196628	1.26399e-08	-7.81472e-11	3.6532e-07	9.06223e-12	1.35899e-09	8.19066e-09	-1.56294e-13	3.63493e-07	9.05317e-12
2022-04-01 14:05:37	9207151	1.28005e-08	-7.26698e-11	3.65499e-07	5.02024e-12	1.19289e-09	8.29472e-09	-1.4534e-13	3.63672e-07	5.01522e-12
2022-04-01 14:05:47	9217675	1.25156e-08	-8.13927e-11	3.68366e-07	-4.64399e-12	1.07523e-09	8.11011e-09	-1.62785e-13	3.66524e-07	-4.63935e-12
2022-04-01 14:05:58	9228198	1.11671e-08	-7.48812e-11	3.6532e-07	-3.18844e-11	8.11393e-10	7.23628e-09	-1.49762e-13	3.63493e-07	-3.18525e-11
2022-04-01 14:06:09	9239231	6.26411e-09	-8.42901e-11	3.13003e-07	-6.30271e-11	6.80128e-10	4.05914e-09	-1.6858e-13	3.11438e-07	-6.29641e-11
2022-04-01 14:06:20	9250285	4.35118e-09	-8.83546e-11	3.0727e-07	-5.55989e-11	5.93437e-10	2.81956e-09	-1.76709e-13	3.05734e-07	-5.55433e-11
2022-04-01 14:06:31	9261338	3.10579e-09	-7.86079e-11	3.05657e-07	-8.42368e-11	5.38113e-10	2.01255e-09	-1.57216e-13	3.04129e-07	-8.41526e-11
2022-04-01 14:06:42	9272391	2.26965e-09	-9.21427e-11	3.11391e-07	-1.00103e-10	4.89216e-10	1.47073e-09	-1.84285e-13	3.09834e-07	-1.00003e-10
2022-04-01 14:06:53	9283444	1.69578e-09	-8.23039e-11	3.22499e-07	-9.30841e-11	4.50409e-10	1.09887e-09	-1.64608e-13	3.20887e-07	-9.2991e-11
2022-04-01 14:07:04	9294498	1.29523e-09	-8.7126e-11	3.32712e-07	-1.05156e-10	4.25346e-10	8.39309e-10	-1.74252e-13	3.31048e-07	-1.05051e-10
2022-04-01 14:07:15	9305551	9.21434e-10	-9.48865e-11	3.41401e-07	-9.94588e-11	4.02226e-10	5.97089e-10	-1.89773e-13	3.39694e-07	-9.93593e-11
2022-04-01 14:07:27	9317645	6.33088e-10	-8.47406e-11	3.48388e-07	-9.78463e-11	3.65821e-10	4.10241e-10	-1.69481e-13	3.46646e-07	-9.77485e-11
2022-04-01 14:07:40	9330908	4.40158e-10	-9.26546e-11	3.51883e-07	-1.1424e-10	3.41289e-10	2.85222e-10	-1.85309e-13	3.50124e-07	-1.14126e-10
2022-04-01 14:07:54	9344171	2.99881e-10	-9.09141e-11	3.39609e-07	-1.13842e-10	3.88949e-10	1.94323e-10	-1.81828e-13	3.37911e-07	-1.13728e-10
2022-04-01 14:08:07	9357435	1.60067e-10	-9.13236e-11	2.46802e-07	-1.18916e-10	5.29966e-10	1.03723e-10	-1.82647e-13	2.45568e-07	-1.18797e-10
2022-04-01 14:08:20	9370698	8.05711e-11	-9.49684e-11	1.58473e-07	-1.20045e-10	6.23506e-10	5.22101e-11	-1.89937e-13	1.57681e-07	-1.19925e-10
2022-04-01 14:08:33	9383961	1.75332e-11	-9.16512e-11	9.96158e-08	-1.17174e-10	6.6107e-10	1.13615e-11	-1.83302e-13	9.91177e-08	-1.17057e-10
2022-04-01 14:08:47	9397224	-2.18332e-11	-9.1252e-11	6.22877e-08	-1.09563e-10	6.65178e-10	-1.41479e-11	-1.82504e-13	6.19763e-08	-1.09453e-10
2022-04-01 14:09:00	9410998	-4.34299e-11	-8.72387e-11	4.04982e-08	-1.18572e-10	6.56501e-10	-2.81426e-11	-1.74477e-13	4.02957e-08	-1.18453e-10
2022-04-01 14:09:14	9424511	-5.67169e-11	-8.27953e-11	2.72595e-08	-1.22506e-10	6.29688e-10	-3.67526e-11	-1.65591e-13	2.71232e-08	-1.22383e-10
2022-04-01 14:09:28	9438025	-6.04364e-11	-8.29693e-11	1.92754e-08	-1.20217e-10	6.15029e-10	-3.91628e-11	-1.65939e-13	1.9179e-08	-1.20097e-10
2022-04-01 14:09:41	9451538	-8.10441e-11	-8.14746e-11	1.442e-08	-1.25968e-10	5.83939e-10	-5.25166e-11	-1.62949e-13	1.43479e-08	-1.25842e-10
2022-04-01 14:09:55	9465051	-8.72146e-11	-8.0676e-11	1.14094e-08	-1.19636e-10	5.60719e-10	-5.65151e-11	-1.61352e-13	1.13524e-08	-1.19516e-10
2022-04-01 14:10:08	9478565	-1.01727e-10	-8.14746e-11	9.59817e-09	-1.24388e-10	5.24637e-10	-6.59191e-11	-1.62949e-13	9.55018e-09	-1.24264e-10
2022-04-01 14:10:22	9492078	-9.71798e-11	-8.67165e-11	8.41067e-09	-1.35041e-10	5.11684e-10	-6.29725e-11	-1.73433e-13	8.36862e-09	-1.34906e-10
2022-04-01 14:10:35	9505591	-8.38176e-11	-9.63505e-11	7.72207e-09	-1.33504e-10	4.89062e-10	-5.43138e-11	-1.92701e-13	7.68346e-09	-1.3337e-10
2022-04-01 14:10:49	9519105	-9.62231e-11	-8.0113e-11	7.19211e-09	-1.20819e-10	4.67647e-10	-6.23526e-11	-1.60226e-13	7.15615e-09	-1.20698e-10
2022-04-01 14:11:03	9533658	-9.40408e-11	-8.79041e-11	6.88943e-09	-1.23882e-10	4.50601e-10	-6.09384e-11	-1.75808e-13	6.85498e-09	-1.23758e-10
2022-04-01 14:11:17	9547701	-9.40086e-11	-8.5273e-11	6.67836e-09	-1.25936e-10	4.38146e-10	-6.09176e-11	-1.70546e-13	6.64497e-09	-1.2581e-10
2022-04-01 14:11:31	9561745	-1.00641e-10	-9.3535e-11	6.56622e-09	-1.30891e-10	4.19004e-10	-6.52154e-11	-1.8707e-13	6.53339e-09	-1.3076e-10
2022-04-01 14:11:45	9575788	-1.06188e-10	-8.86925e-11	6.44412e-09	-1.32633e-10	4.11524e-10	-6.88098e-11	-1.77385e-13	6.4119e-09	-1.325e-10
2022-04-01 14:11:59	9589831	-9.95448e-11	-9.24703e-11	6.39968e-09	-1.22936e-10	3.9649e-10	-6.4505e-11	-1.84941e-13	6.36768e-09	-1.22813e-10
2022-04-01 14:12:13	9603875	-1.00125e-10	-8.59793e-11	6.33132e-09	-1.23237e-10	3.88343e-10	-6.4881e-11	-1.71959e-13	6.29966e-09	-1.23114e-10
2022-04-01 14:12:27	9617918	-1.1037e-10	-8.72182e-11	6.28442e-09	-1.30365e-10	3.78568e-10	-7.15198e-11	-1.74436e-13	6.253e-09	-1.30235e-10
2022-04-01 14:12:41	9631961	-9.77603e-11	-8.8713e-11	6.25893e-09	-1.24441e-10	3.7168e-10	-6.33487e-11	-1.77426e-13	6.22764e-09	-1.24317e-10
2022-04-01 14:12:56	9646005	-1.06586e-10	-9.31358e-11	6.22116e-09	-1.28903e-10	3.69837e-10	-6.90677e-11	-1.86272e-13	6.19005e-09	-1.28774e-10
2022-04-01 14:13:10	9660048	-9.29013e-11	-7.79731e-11	6.19938e-09	-1.3832e-10	3.52223e-10	-6.02e-11	-1.55946e-13	6.16838e-09	-1.38182e-10
2022-04-01 14:13:24	9674091	-1.0421e-10	-8.77301e-11	6.20641e-09	-1.29064e-10	3.48852e-10	-6.75281e-11	-1.7546e-13	6.17538e-09	-1.28935e-10
2022-04-01 14:13:38	9688135	-1.03242e-10	-9.04022e-11	6.18134e-09	-1.32332e-10	3.44921e-10	-6.69008e-11	-1.80804e-13	6.15043e-09	-1.322e-10
2022-04-01 14:13:52	9702178	-1.14293e-10	-7.91198e-11	6.1375e-09	-1.26204e-10	3.44859e-10	-7.40619e-11	-1.5824e-13	6.10681e-09	-1.26078e-10
2022-04-01 14:14:06	9716221	-9.73518e-11	-7.6591e-11	6.13889e-09	-1.24861e-10	3.30178e-10	-6.3084e-11	-1.53182e-13	6.1082e-09	-1.24736e-10
2022-04-01 14:14:20	9730265	-1.1224e-10	-8.25803e-11	6.10317e-09	-1.34063e-10	3.24979e-10	-7.27315e-11	-1.65161e-13	6.07265e-09	-1.33929e-10
2022-04-01 14:14:34	9744308	-1.11799e-10	-8.43208e-11	6.09156e-09	-1.27709e-10	3.22369e-10	-7.24458e-11	-1.68642e-13	6.0611e-09	-1.27581e-10
2022-04-01 14:14:48	9758351	-1.08886e-10	-9.32484e-11	6.10166e-09	-1.25183e-10	3.17869e-10	-7.05581e-11	-1.86497e-13	6.07115e-09	-1.25058e-10
2022-04-01 14:15:02	9772395	-9.7814e-11	-9.39139e-11	6.07314e-09	-1.34106e-10	3.15596e-10	-6.33835e-11	-1.87828e-13	6.04277e-09	-1.33972e-10
2022-04-01 14:15:16	9786438	-1.03533e-10	-7.93144e-11	6.06608e-09	-1.28763e-10	3.04347e-10	-6.70894e-11	-1.58629e-13	6.03575e-09	-1.28634e-10
2022-04-01 14:15:30	9800481	-1.00555e-10	-9.26341e-11	6.05309e-09	-1.25678e-10	3.05299e-10	-6.51596e-11	-1.85268e-13	6.02282e-09	-1.25552e-10
2022-04-01 14:15:44	9814525	-1.11305e-10	-8.30922e-11	6.07506e-09	-1.26613e-10	2.97436e-10	-7.21256e-11	-1.66184e-13	6.04468e-09	-1.26486e-10
2022-04-01 14:15:58	9828568	-1.15132e-10	-8.70236e-11	6.02713e-09	-1.30418e-10	2.95824e-10	-7.46055e-11	-1.74047e-13	5.99699e-09	-1.30288e-10
2022-04-01 14:16:12	9842611	-1.09445e-10	-8.70953e-11	6.00685e-09	-1.22291e-10	2.96093e-10	-7.09204e-11	-1.74191e-13	5.97682e-09	-1.22169e-10
2022-04-01 14:16:26	9856655	-1.02651e-10	-8.53753e-11	6.01887e-09	-1.34568e-10	2.92537e-10	-6.65178e-11	-1.70751e-13	5.98878e-09	-1.34433e-10
2022-04-01 14:16:40	9870698	-1.10402e-10	-8.33687e-11	6.01049e-09	-1.36933e-10	2.82862e-10	-7.15405e-11	-1.66737e-13	5.98044e-09	-1.36796e-10
2022-04-01 14:16:54	9884741	-1.03973e-10	-8.0676e-11	5.99303e-09	-1.24893e-10	2.91094e-10	-6.73745e-11	-1.61352e-13	5.96306e-09	-1.24768e-10
2022-04-01 14:17:08	9898785	-1.11176e-10	-8.40546e-11	5.99848e-09	-1.31762e-10	2.78432e-10	-7.2042e-11	-1.68109e-13	5.96849e-09	-1.3163e-10
2022-04-01 14:17:22	9912828	-1.04995e-10	-9.91248e-11	5.97667e-09	-1.30741e-10	2.89336e-10	-6.80368e-11	-1.9825e-13	5.94679e-09	-1.3061e-10
2022-04-01 14:17:36	9926871	-1.09413e-10	-8.37065e-11	5.97388e-09	-1.30719e-10	2.82501e-10	-7.08996e-11	-1.67413e-13	5.94401e-09	-1.30588e-10
2022-04-01 14:17:50	9940915	-1.01651e-10	-8.92249e-11	5.9932e-09	-1.27258e-10	2.82709e-10	-6.58698e-11	-1.7845e-13	5.96323e-09	-1.27131e-10
2022-04-01 14:18:04	9954958	-1.16723e-10	-9.08425e-11	5.98003e-09	-1.336e-10	2.80251e-10	-7.56365e-11	-1.81685e-13	5.95013e-09	-1.33466e-10
2022-04-01 14:18:19	9969001	-1.21195e-10	-8.75049e-11	5.98343e-09	-1.29537e-10	2.71636e-10	-7.85344e-11	-1.7501e-13	5.95351e-09	-1.29407e-10
2022-04-01 14:18:33	9983045	-1.06844e-10	-8.60203e-11	5.94196e-09	-1.29526e-10	2.75914e-10	-6.92349e-11	-1.72041e-13	5.91225e-09	-1.29396e-10
2022-04-01 14:18:47	9997088	-1.14874e-10	-8.01027e-11	5.92969e-09	-1.26183e-10	2.76866e-10	-7.44384e-11	-1.60205e-13	5.90004e-09	-1.26057e-10
2022-04-01 14:19:01	10011131	-1.02673e-10	-9.17639e-11	5.9551e-09	-1.21485e-10	2.78662e-10	-6.65321e-11	-1.83528e-13	5.92532e-09	-1.21364e-10
2022-04-01 14:19:15	10025175	-1.09735e-10	-8.9665e-11	5.92924e-09	-1.20862e-10	2.65156e-10	-7.11083e-11	-1.7933e-13	5.89959e-09	-1.20741e-10
2022-04-01 14:19:29	10039218	-9.9577e-11	-8.49146e-11	5.95737e-09	-1.14207e-10	2.71022e-10	-6.45259e-11	-1.69829e-13	5.92758e-09	-1.14093e-10
2022-04-01 14:19:43	10053261	-1.10681e-10	-9.95648e-11	5.95376e-09	-1.23044e-10	2.69325e-10	-7.17213e-11	-1.9913e-13	5.92399e-09	-1.22921e-10
2022-04-01 14:19:57	10067305	-1.01619e-10	-8.32355e-11	5.95008e-09	-1.24495e-10	2.67191e-10	-6.58491e-11	-1.66471e-13	5.92033e-09	-1.24371e-10
2022-04-01 14:20:11	10081348	-1.14272e-10	-9.3873e-11	5.94507e-09	-1.32912e-10	2.63113e-10	-7.40483e-11	-1.87746e-13	5.91534e-09	-1.32779e-10
2022-04-01 14:20:25	10095391	-1.10187e-10	-9.84695e-11	5.92711e-09	-1.35525e-10	2.68549e-10	-7.14012e-11	-1.96939e-13	5.89747e-09	-1.35389e-10
2022-04-01 14:20:39	10109435	-1.15089e-10	-8.73001e-11	5.93474e-09	-1.16884e-10	2.61001e-10	-7.45777e-11	-1.746e-13	5.90507e-09	-1.16767e-10
2022-04-01 14:20:53	10123478	-1.03812e-10	-8.81191e-11	6.25876e-09	-1.27881e-10	2.59673e-10	-6.72702e-11	-1.76238e-13	6.22747e-09	-1.27753e-10
2022-04-01 14:21:07	10137521	-1.0493e-10	-7.21784e-11	5.28093e-09	-1.31483e-10	2.63366e-10	-6.79946e-11	-1.44357e-13	5.25453e-09	-1.31352e-10
2022-04-01 14:21:21	10151565	-1.03436e-10	-7.6335e-11	5.17024e-09	-1.28172e-10	2.68665e-10	-6.70265e-11	-1.5267e-13	5.14439e-09	-1.28044e-10
2022-04-01 14:21:35	10165608	-1.03769e-10	-9.04227e-11	5.2646e-09	-1.21829e-10	2.56878e-10	-6.72423e-11	-1.80845e-13	5.23828e-09	-1.21707e-10
2022-04-01 14:21:49	10179651	-1.09004e-10	-7.81472e-11	5.45977e-09	-1.10563e-10	2.67744e-10	-7.06346e-11	-1.56294e-13	5.43247e-09	-1.10452e-10
2022-04-01 14:22:03	10193695	-9.962e-11	-8.46996e-11	5.55423e-09	-1.31182e-10	2.64157e-10	-6.45538e-11	-1.69399e-13	5.52646e-09	-1.31051e-10
2022-04-01 14:22:17	10207738	-1.05382e-10	-8.02358e-11	5.63468e-09	-1.27086e-10	2.5856e-10	-6.82875e-11	-1.60472e-13	5.60651e-09	-1.26959e-10
2022-04-01 14:22:31	10221781	-9.6137e-11	-8.04406e-11	1.94445e-08	-1.24474e-10	2.80766e-10	-6.22968e-11	-1.60881e-13	1.93473e-08	-1.2435e-10
2022-04-01 14:22:46	10236335	-9.85558e-11	-7.93553e-11	1.13681e-07	-1.21861e-10	2.68273e-10	-6.38642e-11	-1.58711e-13	1.13113e-07	-1.21739e-10
2022-04-01 14:23:00	10250108	-1.08865e-10	-9.848e-11	2.33812e-07	-1.24861e-10	2.30004e-10	-7.05445e-11	-1.9696e-13	2.32643e-07	-1.24736e-10
2022-04-01 14:23:13	10263371	-1.06618e-10	-8.76789e-11	3.04941e-07	-1.22592e-10	2.26402e-10	-6.90885e-11	-1.75358e-13	3.03416e-07	-1.22469e-10
2022-04-01 14:23:26	10276635	-1.16809e-10	-9.38012e-11	3.35399e-07	-1.24334e-10	2.0762e-10	-7.56922e-11	-1.87602e-13	3.33722e-07	-1.2421e-10
2022-04-01 14:23:39	10289898	-1.1797e-10	-1.0624e-10	3.57526e-07	-1.35138e-10	1.97769e-10	-7.64446e-11	-2.1248e-13	3.55738e-07	-1.35003e-10
2022-04-01 14:23:53	10303161	-1.1983e-10	-9.55514e-11	3.72487e-07	-1.24323e-10	1.89238e-10	-7.76498e-11	-1.91103e-13	3.70625e-07	-1.24199e-10
2022-04-01 14:24:06	10316425	-1.13584e-10	-1.09281e-10	3.91658e-07	-1.25323e-10	1.75478e-10	-7.36024e-11	-2.18562e-13	3.897e-07	-1.25198e-10
2022-04-01 14:24:19	10329688	-1.15067e-10	-9.99029e-11	4.02945e-07	-1.28365e-10	1.71639e-10	-7.45634e-11	-1.99806e-13	4.0093e-07	-1.28237e-10
2022-04-01 14:24:32	10342951	-6.28014e-11	-1.03998e-10	4.05453e-07	-9.92438e-11	8.25029e-10	-4.06953e-11	-2.07996e-13	4.03426e-07	-9.91446e-11
2022-04-01 14:24:46	10356214	2.65552e-09	-8.71874e-11	3.88612e-07	-4.58164e-11	2.39114e-09	1.72078e-09	-1.74375e-13	3.86669e-07	-4.57706e-11
2022-04-01 14:25:02	10372728	6.06303e-09	-9.86943e-11	3.59497e-07	-6.55749e-13	3.21744e-09	3.92884e-09	-1.97389e-13	3.577e-07	-6.55093e-13
2022-04-01 14:25:13	10383781	7.98716e-09	-8.8283e-11	3.63259e-07	2.88959e-11	3.31686e-09	5.17568e-09	-1.76566e-13	3.61443e-07	2.8867e-11
2022-04-01 14:25:24	10394835	9.474e-09	-7.5383e-11	3.66932e-07	3.83129e-11	3.09894e-09	6.13915e-09	-1.50766e-13	3.65097e-07	3.82746e-11
2022-04-01 14:25:36	10406928	1.06954e-08	-8.52934e-11	3.6953e-07	3.43354e-11	2.72179e-09	6.93062e-09	-1.70587e-13	3.67682e-07	3.43011e-11
2022-04-01 14:25:47	10417451	1.14587e-08	-7.83725e-11	3.68813e-07	4.34514e-11	2.34963e-09	7.42524e-09	-1.56745e-13	3.66969e-07	4.34079e-11
2022-04-01 14:25:57	10427975	1.19397e-08	-8.17817e-11	3.66663e-07	3.15512e-11	2.0221e-09	7.73693e-09	-1.63563e-13	3.6483e-07	3.15196e-11
2022-04-01 14:26:08	10438498	1.22407e-08	-7.34889e-11	3.65499e-07	2.11667e-11	1.74464e-09	7.93197e-09	-1.46978e-13	3.63672e-07	2.11455e-11
2022-04-01 14:26:19	10449021	1.25014e-08	-7.32841e-11	3.65051e-07	2.53592e-11	1.52188e-09	8.10091e-09	-1.46568e-13	3.63226e-07	2.53338e-11
2022-04-01 14:26:29	10459545	1.27238e-08	-7.24549e-11	3.65499e-07	1.82857e-11	1.32281e-09	8.24502e-09	-1.4491e-13	3.63672e-07	1.82674e-11
2022-04-01 14:26:40	10470068	1.28427e-08	-8.43106e-11	3.6532e-07	1.27817e-11	1.17672e-09	8.32207e-09	-1.68621e-13	3.63493e-07	1.27689e-11
2022-04-01 14:26:50	10480591	1.21723e-08	-8.46279e-11	3.55466e-07	6.53599e-12	1.06149e-09	7.88765e-09	-1.69256e-13	3.53689e-07	6.52945e-12
2022-04-01 14:27:01	10491114	9.57081e-09	-7.92734e-11	3.37997e-07	-3.31529e-11	7.87193e-10	6.20188e-09	-1.58547e-13	3.36307e-07	-3.31197e-11
2022-04-01 14:27:12	10502148	5.65996e-09	-7.45127e-11	3.09778e-07	-5.45024e-11	6.77226e-10	3.66765e-09	-1.49025e-13	3.08229e-07	-5.44479e-11
2022-04-01 14:27:23	10513201	4.01056e-09	-7.67753e-11	3.07001e-07	-7.48951e-11	6.05838e-10	2.59884e-09	-1.53551e-13	3.05466e-07	-7.48202e-11
2022-04-01 14:27:34	10524254	2.88574e-09	-7.4185e-11	3.06553e-07	-8.15278e-11	5.4044e-10	1.86996e-09	-1.4837e-13	3.0502e-07	-8.14463e-11
2022-04-01 14:27:45	10535307	2.12509e-09	-8.55903e-11	3.14078e-07	-8.32048e-11	5.03321e-10	1.37706e-09	-1.71181e-13	3.12508e-07	-8.31216e-11
2022-04-01 14:27:56	10546360	1.59258e-09	-7.67549e-11	3.25008e-07	-9.40086e-11	4.64484e-10	1.03199e-09	-1.5351e-13	3.23383e-07	-9.39146e-11
2022-04-01 14:28:07	10557413	1.17367e-09	-7.65501e-11	3.34413e-07	-9.32668e-11	4.43391e-10	7.60538e-10	-1.531e-13	3.32741e-07	-9.31735e-11
2022-04-01 14:28:19	10569507	8.12257e-10	-8.50272e-11	3.44626e-07	-9.26863e-11	3.96159e-10	5.26343e-10	-1.70054e-13	3.42903e-07	-9.25936e-11
2022-04-01 14:28:32	10582771	5.54333e-10	-8.16077e-11	3.50987e-07	-9.37506e-11	3.82208e-10	3.59208e-10	-1.63215e-13	3.49232e-07	-9.36568e-11
2022-04-01 14:28:46	10596034	3.81151e-10	-9.65752e-11	3.52868e-07	-9.97383e-11	3.67073e-10	2.46986e-10	-1.9315e-13	3.51104e-07	-9.96386e-11
2022-04-01 14:28:59	10609297	2.56387e-10	-8.56415e-11	3.10584e-07	-1.0478e-10	4.66226e-10	1.66139e-10	-1.71283e-13	3.09031e-07	-1.04675e-10
2022-04-01 14:29:12	10622560	1.26978e-10	-9.2757e-11	2.1061e-07	-1.14487e-10	5.93061e-10	8.22817e-11	-1.85514e-13	2.09557e-07	-1.14373e-10
2022-04-01 14:29:25	10635823	5.95549e-11	-7.30487e-11	1.3312e-07	-1.19873e-10	6.55388e-10	3.85916e-11	-1.46097e-13	1.32454e-07	-1.19753e-10
2022-04-01 14:29:39	10649087	4.04199e-12	-7.38984e-11	8.42075e-08	-1.20926e-10	6.84804e-10	2.61921e-12	-1.47797e-13	8.37865e-08	-1.20805e-10
2022-04-01 14:29:52	10662350	-2.06614e-11	-8.33584e-11	5.29817e-08	-1.15745e-10	6.80113e-10	-1.33886e-11	-1.66717e-13	5.27168e-08	-1.15629e-10
2022-04-01 14:30:06	10676124	-5.32124e-11	-8.22527e-11	3.49967e-08	-1.19969e-10	6.58951e-10	-3.44816e-11	-1.64505e-13	3.48217e-08	-1.19849e-10
2022-04-01 14:30:19	10689637	-6.33604e-11	-9.02998e-11	2.39506e-08	-1.28559e-10	6.28251e-10	-4.10575e-11	-1.806e-13	2.38308e-08	-1.2843e-10
2022-04-01 14:30:33	10703150	-7.79696e-11	-7.97239e-11	1.72262e-08	-1.26613e-10	6.16174e-10	-5.05243e-11	-1.59448e-13	1.71401e-08	-1.26486e-10
2022-04-01 14:30:46	10716663	-6.91868e-11	-9.07503e-11	1.31675e-08	-1.27871e-10	5.89275e-10	-4.4833e-11	-1.81501e-13	1.31017e-08	-1.27743e-10
2022-04-01 14:31:00	10730177	-7.84318e-11	-8.68701e-11	1.06043e-08	-1.21775e-10	5.59076e-10	-5.08238e-11	-1.7374e-13	1.05513e-08	-1.21653e-10
2022-04-01 14:31:13	10743690	-8.91281e-11	-8.80474e-11	9.11108e-09	-1.23904e-10	5.37891e-10	-5.7755e-11	-1.76095e-13	9.06552e-09	-1.2378e-10
2022-04-01 14:31:27	10757203	-9.31808e-11	-8.64708e-11	8.11955e-09	-1.30268e-10	5.21013e-10	-6.03812e-11	-1.72942e-13	8.07895e-09	-1.30138e-10
2022-04-01 14:31:40	10770717	-9.97598e-11	-8.62763e-11	7.44712e-09	-1.28526e-10	4.99306e-10	-6.46444e-11	-1.72553e-13	7.40988e-09	-1.28397e-10
2022-04-01 14:31:55	10785271	-9.53738e-11	-8.80372e-11	7.05237e-09	-1.3059e-10	4.75111e-10	-6.18022e-11	-1.76074e-13	7.01711e-09	-1.30459e-10
2022-04-01 14:32:09	10799314	-9.90718e-11	-9.29924e-11	6.7816e-09	-1.34407e-10	4.63554e-10	-6.41985e-11	-1.85985e-13	6.74769e-09	-1.34273e-10
2022-04-01 14:32:23	10813357	-9.22563e-11	-6.60868e-11	6.6371e-09	-1.32095e-10	4.3843e-10	-5.97821e-11	-1.32174e-13	6.60391e-09	-1.31963e-10
2022-04-01 14:32:37	10827401	-1.11477e-10	-9.1815e-11	6.5139e-09	-1.33729e-10	4.24486e-10	-7.22371e-11	-1.8363e-13	6.48133e-09	-1.33595e-10
2022-04-01 14:32:51	10841444	-8.80101e-11	-7.25982e-11	6.43581e-09	-1.26839e-10	4.13214e-10	-5.70305e-11	-1.45196e-13	6.40363e-09	-1.26712e-10
2022-04-01 14:33:05	10855487	-9.41698e-11	-8.49658e-11	6.36726e-09	-1.30064e-10	4.07171e-10	-6.1022e-11	-1.69932e-13	6.33542e-09	-1.29934e-10
2022-04-01 14:33:19	10869531	-9.45138e-11	-8.7986e-11	6.31846e-09	-1.2829e-10	3.96528e-10	-6.12449e-11	-1.75972e-13	6.28687e-09	-1.28162e-10
2022-04-01 14:33:33	10883574	-9.99963e-11	-9.00234e-11	6.2785e-09	-1.17518e-10	3.87506e-10	-6.47976e-11	-1.80047e-13	6.24711e-09	-1.174e-10
2022-04-01 14:33:47	10897617	-1.0092e-10	-7.71746e-11	6.24825e-09	-1.2972e-10	3.82361e-10	-6.53962e-11	-1.54349e-13	6.21701e-09	-1.2959e-10
2022-04-01 14:34:01	10911661	-9.16328e-11	-8.91327e-11	6.20456e-09	-1.19174e-10	3.7436e-10	-5.93781e-11	-1.78265e-13	6.17354e-09	-1.19055e-10
2022-04-01 14:34:15	10925704	-1.04307e-10	-7.95908e-11	6.20422e-09	-1.20582e-10	3.70728e-10	-6.75909e-11	-1.59182e-13	6.1732e-09	-1.20461e-10
2022-04-01 14:34:29	10939747	-1.02296e-10	-9.06479e-11	6.17032e-09	-1.23764e-10	3.55548e-10	-6.62878e-11	-1.81296e-13	6.13947e-09	-1.2364e-10
2022-04-01 14:34:43	10953791	-1.00566e-10	-9.04125e-11	6.13304e-09	-1.30354e-10	3.48652e-10	-6.51668e-11	-1.80825e-13	6.10237e-09	-1.30224e-10
2022-04-01 14:34:57	10967834	-1.07661e-10	-8.85184e-11	6.12759e-09	-1.29687e-10	3.51501e-10	-6.97643e-11	-1.77037e-13	6.09695e-09	-1.29557e-10
2022-04-01 14:35:11	10981877	-1.16723e-10	-9.12725e-11	6.09483e-09	-1.29085e-10	3.4155e-10	-7.56365e-11	-1.82545e-13	6.06436e-09	-1.28956e-10
2022-04-01 14:35:25	10995920	-9.9878e-11	-9.46408e-11	6.0822e-09	-1.24893e-10	3.42287e-10	-6.47209e-11	-1.89282e-13	6.05179e-09	-1.24768e-10
2022-04-01 14:35:39	11009964	-1.14594e-10	-9.0955e-11	6.0848e-09	-1.33127e-10	3.23881e-10	-7.42569e-11	-1.8191e-13	6.05438e-09	-1.32994e-10
2022-04-01 14:35:54	11024007	-1.09649e-10	-9.70257e-11	6.0565e-09	-1.22743e-10	3.23605e-10	-7.10526e-11	-1.94051e-13	6.02622e-09	-1.2262e-10
2022-04-01 14:36:08	11038050	-1.0063e-10	-8.97674e-11	6.07767e-09	-1.25344e-10	3.19328e-10	-6.52082e-11	-1.79535e-13	6.04728e-09	-1.25219e-10
2022-04-01 14:36:22	11052094	-1.03973e-10	-8.7597e-11	6.03283e-09	-1.38341e-10	3.17692e-10	-6.73745e-11	-1.75194e-13	6.00267e-09	-1.38203e-10
2022-04-01 14:36:36	11066137	-1.03425e-10	-8.97879e-11	6.05433e-09	-1.33762e-10	3.10566e-10	-6.70194e-11	-1.79576e-13	6.02406e-09	-1.33628e-10
2022-04-01 14:36:50	11080180	-1.02382e-10	-7.94577e-11	6.04565e-09	-1.32622e-10	3.10037e-10	-6.63435e-11	-1.58915e-13	6.01542e-09	-1.32489e-10
2022-04-01 14:37:04	11094223	-1.14261e-10	-9.19277e-11	6.01614e-09	-1.27494e-10	2.9997e-10	-7.40411e-11	-1.83855e-13	5.98606e-09	-1.27367e-10
2022-04-01 14:37:18	11108267	-1.19873e-10	-8.8713e-11	6.01873e-09	-1.3976e-10	3.14061e-10	-7.76777e-11	-1.77426e-13	5.98864e-09	-1.3962e-10
2022-04-01 14:37:32	11122310	-1.09112e-10	-9.14055e-11	6.00036e-09	-1.38008e-10	2.94526e-10	-7.07046e-11	-1.82811e-13	5.97036e-09	-1.3787e-10
2022-04-01 14:37:46	11136353	-1.1812e-10	-9.38012e-11	6.00191e-09	-1.28043e-10	2.92161e-10	-7.65418e-11	-1.87602e-13	5.9719e-09	-1.27915e-10
2022-04-01 14:38:00	11150397	-1.22033e-10	-8.31639e-11	5.98674e-09	-1.24689e-10	2.94242e-10	-7.90774e-11	-1.66328e-13	5.95681e-09	-1.24564e-10
2022-04-01 14:38:14	11164440	-1.15014e-10	-7.9775e-11	5.97605e-09	-1.29042e-10	2.88974e-10	-7.45291e-11	-1.5955e-13	5.94617e-09	-1.28913e-10
2022-04-01 14:38:28	11178483	-1.03414e-10	-7.95396e-11	5.97682e-09	-1.323e-10	2.92276e-10	-6.70123e-11	-1.59079e-13	5.94694e-09	-1.32168e-10
2022-04-01 14:38:42	11192527	-1.14455e-10	-8.37679e-11	5.96681e-09	-1.21496e-10	2.93259e-10	-7.41668e-11	-1.67536e-13	5.93698e-09	-1.21375e-10
2022-04-01 14:38:56	11206570	-1.06543e-10	-8.65117e-11	5.97635e-09	-1.25807e-10	2.85757e-10	-6.90399e-11	-1.73023e-13	5.94647e-09	-1.25681e-10
2022-04-01 14:39:10	11220613	-1.05468e-10	-7.59563e-11	5.98143e-09	-1.19797e-10	2.88568e-10	-6.83433e-11	-1.51913e-13	5.95152e-09	-1.19677e-10
2022-04-01 14:39:24	11234657	-1.18443e-10	-8.1147e-11	5.96495e-09	-1.20356e-10	2.81265e-10	-7.67511e-11	-1.62294e-13	5.93513e-09	-1.20236e-10
2022-04-01 14:39:38	11248700	-1.12831e-10	-8.91122e-11	5.93743e-09	-1.27043e-10	2.70646e-10	-7.31145e-11	-1.78224e-13	5.90774e-09	-1.26916e-10
2022-04-01 14:39:52	11262743	-1.1969e-10	-9.17946e-11	5.94711e-09	-1.33568e-10	2.71928e-10	-7.75591e-11	-1.83589e-13	5.91737e-09	-1.33434e-10
2022-04-01 14:40:06	11276787	-1.19142e-10	-7.91096e-11	5.94054e-09	-1.19443e-10	2.71836e-10	-7.7204e-11	-1.58219e-13	5.91084e-09	-1.19324e-10
2022-04-01 14:40:20	11290830	-9.84375e-11	-8.16487e-11	5.93728e-09	-1.2485e-10	2.68481e-10	-6.37875e-11	-1.63297e-13	5.90759e-09	-1.24725e-10
2022-04-01 14:40:34	11304873	-1.05392e-10	-8.59077e-11	5.93083e-09	-1.27924e-10	2.68319e-10	-6.8294e-11	-1.71815e-13	5.90118e-09	-1.27796e-10
2022-04-01 14:40:48	11318917	-1.12057e-10	-9.15489e-11	5.93031e-09	-1.18819e-10	2.65739e-10	-7.26129e-11	-1.83098e-13	5.90066e-09	-1.187e-10
2022-04-01 14:41:02	11332960	-1.04339e-10	-8.85184e-11	5.92377e-09	-1.32289e-10	2.63696e-10	-6.76117e-11	-1.77037e-13	5.89415e-09	-1.32157e-10
2022-04-01 14:41:17	11347003	-1.04801e-10	-8.1065e-11	5.91299e-09	-1.32257e-10	2.66415e-10	-6.7911e-11	-1.6213e-13	5.88343e-09	-1.32125e-10
2022-04-01 14:41:31	11361047	-1.12584e-10	-9.3576e-11	5.91825e-09	-1.32181e-10	2.67091e-10	-7.29544e-11	-1.87152e-13	5.88866e-09	-1.32049e-10
2022-04-01 14:41:45	11375090	-1.09746e-10	-9.04022e-11	5.94072e-09	-1.34503e-10	2.60733e-10	-7.11154e-11	-1.80804e-13	5.91102e-09	-1.34368e-10
2022-04-01 14:41:59	11389133	-1.09004e-10	-9.0525e-11	5.45252e-09	-1.32773e-10	2.67644e-10	-7.06346e-11	-1.8105e-13	5.42526e-09	-1.3264e-10
2022-04-01 14:42:13	11403177	-1.09241e-10	-8.79144e-11	5.22858e-09	-1.29193e-10	2.6772e-10	-7.07882e-11	-1.75829e-13	5.20244e-09	-1.29064e-10
2022-04-01 14:42:27	11417220	-1.04715e-10	-8.80884e-11	5.19571e-09	-1.31762e-10	2.65486e-10	-6.78553e-11	-1.76177e-13	5.16973e-09	-1.3163e-10
2022-04-01 14:42:41	11431263	-1.01447e-10	-8.29489e-11	5.36014e-09	-1.43103e-10	2.55995e-10	-6.57377e-11	-1.65898e-13	5.33334e-09	-1.4296e-10
2022-04-01 14:42:55	11445307	-1.09402e-10	-8.64708e-11	5.52865e-09	-1.32052e-10	2.64549e-10	-7.08925e-11	-1.72942e-13	5.50101e-09	-1.3192e-10
2022-04-01 14:43:09	11459350	-9.8674e-11	-8.83034e-11	5.6056e-09	-1.34106e-10	2.62814e-10	-6.39408e-11	-1.76607e-13	5.57757e-09	-1.33972e-10
2022-04-01 14:43:23	11473393	-1.09574e-10	-8.52012e-11	5.76416e-09	-1.26548e-10	2.69594e-10	-7.1004e-11	-1.70402e-13	5.73534e-09	-1.26421e-10
2022-04-01 14:43:37	11487437	-1.08832e-10	-8.06658e-11	4.49712e-08	-1.22173e-10	2.81465e-10	-7.05231e-11	-1.61332e-13	4.47463e-08	-1.22051e-10
2022-04-01 14:43:51	11501991	-1.06274e-10	-9.25215e-11	1.83377e-07	-1.18325e-10	2.59266e-10	-6.88656e-11	-1.85043e-13	1.8246e-07	-1.18207e-10
2022-04-01 14:44:05	11515765	-9.70186e-11	-9.04125e-11	2.57999e-07	-1.11799e-10	2.35394e-10	-6.28681e-11	-1.80825e-13	2.56709e-07	-1.11687e-10
2022-04-01 14:44:19	11529028	-1.09778e-10	-9.81114e-11	3.15512e-07	-1.12692e-10	2.27009e-10	-7.11361e-11	-1.96223e-13	3.13934e-07	-1.12579e-10
2022-04-01 14:44:32	11542291	-1.0006e-10	-9.86029e-11	3.49553e-07	-1.20539e-10	2.19369e-10	-6.48389e-11	-1.97206e-13	3.47805e-07	-1.20418e-10
2022-04-01 14:44:45	11555554	-1.12842e-10	-9.1559e-11	3.74816e-07	-1.08703e-10	2.07951e-10	-7.31216e-11	-1.83118e-13	3.72942e-07	-1.08594e-10
2022-04-01 14:44:58	11568817	-1.06994e-10	-9.63095e-11	3.90762e-07	-1.1095e-10	1.90321e-10	-6.93321e-11	-1.92619e-13	3.88808e-07	-1.10839e-10
2022-04-01 14:45:12	11582081	-1.09123e-10	-9.74562e-11	3.91837e-07	-1.0564e-10	1.83302e-10	-7.07117e-11	-1.94912e-13	3.89878e-07	-1.05534e-10
2022-04-01 14:45:25	11595344	-1.24044e-10	-9.87352e-11	3.90583e-07	-1.16938e-10	2.19914e-10	-8.03805e-11	-1.9747e-13	3.8863e-07	-1.16821e-10
2022-04-01 14:45:38	11608607	4.26742e-10	-9.46612e-11	3.82251e-07	-8.23448e-11	1.41396e-09	2.76529e-10	-1.89322e-13	3.8034e-07	-8.22625e-11
2022-04-01 14:45:51	11621870	4.11049e-09	-8.08091e-11	3.63618e-07	-3.11212e-11	2.62009e-09	2.6636e-09	-1.61618e-13	3.618e-07	-3.10901e-11
2022-04-01 14:46:08	11638384	6.95187e-09	-8.51706e-11	3.59138e-07	5.48249e-12	3.20466e-09	4.50481e-09	-1.70341e-13	3.57342e-07	5.47701e-12
2022-04-01 14:46:19	11649437	8.54535e-09	-8.16793e-11	3.61737e-07	2.01669e-11	3.16073e-09	5.53739e-09	-1.63359e-13	3.59928e-07	2.01467e-11
2022-04-01 14:46:30	11660491	9.82181e-09	-8.15974e-11	3.6532e-07	1.98552e-11	2.89466e-09	6.36453e-09	-1.63195e-13	3.63493e-07	1.98353e-11
2022-04-01 14:46:42	11672585	1.09461e-08	-9.28081e-11	3.65947e-07	3.72594e-11	2.50086e-09	7.09307e-09	-1.85616e-13	3.64117e-07	3.72221e-11
2022-04-01 14:46:53	11683108	1.14594e-08	-8.68803e-11	3.64424e-07	3.50126e-11	2.15759e-09	7.42569e-09	-1.73761e-13	3.62602e-07	3.49776e-11
2022-04-01 14:47:03	11693631	1.18578e-08	-8.54572e-11	3.62812e-07	1.06424e-11	1.84679e-09	7.68385e-09	-1.70914e-13	3.60998e-07	1.06318e-11
2022-04-01 14:47:14	11704154	1.2232e-08	-8.62558e-11	3.62095e-07	1.28677e-11	1.60093e-09	7.92634e-09	-1.72512e-13	3.60285e-07	1.28548e-11
2022-04-01 14:47:24	11714677	1.24249e-08	-8.34403e-11	3.61288e-07	3.40774e-12	1.39923e-09	8.05134e-09	-1.66881e-13	3.59482e-07	3.40433e-12
2022-04-01 14:47:35	11725200	1.26097e-08	-8.20684e-11	3.61916e-07	1.08467e-11	1.23154e-09	8.17109e-09	-1.64137e-13	3.60106e-07	1.08359e-11
2022-04-01 14:47:45	11735723	1.2648e-08	-7.57617e-11	3.62812e-07	-5.43949e-12	1.08335e-09	8.1959e-09	-1.51523e-13	3.60998e-07	-5.43405e-12
2022-04-01 14:47:56	11746246	1.10502e-08	-8.9747e-11	3.68634e-07	-1.68129e-11	7.72014e-10	7.16053e-09	-1.79494e-13	3.66791e-07	-1.67961e-11
2022-04-01 14:48:07	11757280	4.25756e-09	-7.54136e-11	1.78002e-07	-8.98161e-11	5.0981e-10	2.7589e-09	-1.50827e-13	1.77112e-07	-8.97263e-11
2022-04-01 14:48:18	11768333	2.54796e-09	-8.33584e-11	1.39839e-07	-9.31486e-11	4.59454e-10	1.65108e-09	-1.66717e-13	1.3914e-07	-9.30555e-11
2022-04-01 14:48:29	11779386	2.00793e-09	-8.87539e-11	1.33658e-07	-1.06564e-10	4.45218e-10	1.30114e-09	-1.77508e-13	1.3299e-07	-1.06457e-10
2022-04-01 14:48:40	11790440	1.74577e-09	-8.66141e-11	1.34823e-07	-9.93298e-11	4.21791e-10	1.13126e-09	-1.73228e-13	1.34149e-07	-9.92305e-11
2022-04-01 14:48:51	11801493	1.50999e-09	-9.56438e-11	1.34823e-07	-1.0292e-10	4.12093e-10	9.78474e-10	-1.91288e-13	1.34149e-07	-1.02817e-10
2022-04-01 14:49:02	11812546	1.31266e-09	-8.32458e-11	1.38674e-07	-9.46643e-11	3.98356e-10	8.50604e-10	-1.66492e-13	1.37981e-07	-9.45696e-11
2022-04-01 14:49:13	11823600	1.1455e-09	-9.01974e-11	1.38137e-07	-1.0378e-10	3.78399e-10	7.42284e-10	-1.80395e-13	1.37446e-07	-1.03676e-10
2022-04-01 14:49:24	11834653	1.00686e-09	-8.55391e-11	1.38316e-07	-1.13251e-10	3.68601e-10	6.52445e-10	-1.71078e-13	1.37624e-07	-1.13138e-10
2022-04-01 14:49:36	11846746	8.02561e-10	-8.68496e-11	1.36345e-07	-1.07005e-10	3.61767e-10	5.2006e-10	-1.73699e-13	1.35663e-07	-1.06898e-10
2022-04-01 14:49:50	11860010	6.53985e-10	-8.77403e-11	1.36524e-07	-1.17088e-10	3.41588e-10	4.23782e-10	-1.75481e-13	1.35841e-07	-1.16971e-10
2022-04-01 14:50:03	11873273	5.40788e-10	-8.13825e-11	1.36435e-07	-1.16443e-10	3.36597e-10	3.50431e-10	-1.62765e-13	1.35753e-07	-1.16327e-10
2022-04-01 14:50:16	11886536	4.42039e-10	-8.63274e-11	1.34016e-07	-1.07951e-10	3.28442e-10	2.86441e-10	-1.72655e-13	1.33346e-07	-1.07843e-10
2022-04-01 14:50:29	11899799	3.51481e-10	-9.40367e-11	1.35628e-07	-1.29075e-10	3.0953e-10	2.2776e-10	-1.88073e-13	1.3495e-07	-1.28946e-10
2022-04-01 14:50:43	11913063	2.90045e-10	-8.98391e-11	1.3527e-07	-1.32644e-10	3.01798e-10	1.87949e-10	-1.79678e-13	1.34594e-07	-1.32511e-10
2022-04-01 14:50:56	11926326	2.3393e-10	-9.11803e-11	1.37331e-07	-1.30977e-10	3.05529e-10	1.51587e-10	-1.82361e-13	1.36644e-07	-1.30846e-10
2022-04-01 14:51:09	11939589	1.81911e-10	-8.61431e-11	1.34106e-07	-1.26914e-10	2.93182e-10	1.17878e-10	-1.72286e-13	1.33435e-07	-1.26787e-10
2022-04-01 14:51:22	11952852	1.53262e-10	-8.54674e-11	1.37062e-07	-1.194e-10	2.91032e-10	9.93138e-11	-1.70935e-13	1.36377e-07	-1.19281e-10
2022-04-01 14:51:36	11966115	1.2156e-10	-9.60943e-11	1.3751e-07	-1.25957e-10	2.91601e-10	7.87709e-11	-1.92189e-13	1.36822e-07	-1.25831e-10
2022-04-01 14:51:49	11979379	8.91818e-11	-9.76705e-11	1.35449e-07	-1.18303e-10	2.87247e-10	5.77898e-11	-1.95341e-13	1.34772e-07	-1.18185e-10
2022-04-01 14:52:02	11992642	7.34438e-11	-8.72284e-11	1.35539e-07	-1.24291e-10	2.89174e-10	4.75916e-11	-1.74457e-13	1.34861e-07	-1.24167e-10
2022-04-01 14:52:15	12005905	3.81086e-11	-8.84365e-11	1.36166e-07	-1.21861e-10	2.80451e-10	2.46944e-11	-1.76873e-13	1.35485e-07	-1.21739e-10
2022-04-01 14:52:29	12019168	3.55286e-11	-8.70441e-11	1.35002e-07	-1.28741e-10	2.74892e-10	2.30225e-11	-1.74088e-13	1.34327e-07	-1.28612e-10
2022-04-01 14:52:42	12032431	1.04597e-11	-9.09653e-11	1.36345e-07	-1.23635e-10	2.6944e-10	6.77789e-12	-1.81931e-13	1.35663e-07	-1.23511e-10
2022-04-01 14:52:55	12045695	-4.79449e-12	-9.78143e-11	1.3751e-07	-1.27355e-10	2.82548e-10	-3.10683e-12	-1.95629e-13	1.36822e-07	-1.27228e-10
2022-04-01 14:53:08	12058958	-1.32332e-11	-9.38627e-11	1.37689e-07	-1.21926e-10	3.04232e-10	-8.57511e-12	-1.87725e-13	1.37001e-07	-1.21804e-10
2022-04-01 14:53:22	12072221	8.95473e-12	-9.82848e-11	1.35091e-07	-1.28612e-10	3.41442e-10	5.80267e-12	-1.9657e-13	1.34416e-07	-1.28483e-10
2022-04-01 14:53:35	12085485	3.13792e-11	-8.83444e-11	1.35002e-07	-1.24162e-10	3.66904e-10	2.03337e-11	-1.76689e-13	1.34327e-07	-1.24038e-10
2022-04-01 14:53:48	12098748	5.54376e-11	-9.10472e-11	1.34464e-07	-1.15755e-10	3.87874e-10	3.59236e-11	-1.82094e-13	1.33792e-07	-1.15639e-10
2022-04-01 14:54:02	12112011	5.57816e-11	-9.26852e-11	1.34285e-07	-1.30838e-10	4.06464e-10	3.61465e-11	-1.8537e-13	1.33614e-07	-1.30707e-10
2022-04-01 14:54:15	12125275	6.58866e-11	-8.65936e-11	1.36524e-07	-1.1797e-10	4.21207e-10	4.26945e-11	-1.73187e-13	1.35841e-07	-1.17852e-10
2022-04-01 14:54:28	12138538	5.81574e-11	-9.73638e-11	1.34285e-07	-1.26323e-10	4.14196e-10	3.7686e-11	-1.94728e-13	1.33614e-07	-1.26197e-10
2022-04-01 14:54:41	12151801	6.14254e-11	-8.81806e-11	1.35002e-07	-1.30418e-10	4.09659e-10	3.98037e-11	-1.76361e-13	1.34327e-07	-1.30288e-10
2022-04-01 14:54:55	12165064	5.51474e-11	-9.30231e-11	1.34374e-07	-1.21388e-10	4.09919e-10	3.57355e-11	-1.86046e-13	1.33702e-07	-1.21267e-10
2022-04-01 14:55:08	12178327	3.76786e-11	-9.38012e-11	1.33031e-07	-1.28709e-10	4.00176e-10	2.44157e-11	-1.87602e-13	1.32366e-07	-1.2858e-10
2022-04-01 14:55:21	12191591	3.71089e-11	-9.11598e-11	1.33031e-07	-1.26806e-10	4.04998e-10	2.40466e-11	-1.8232e-13	1.32366e-07	-1.26679e-10
2022-04-01 14:55:34	12204854	3.66681e-11	-1.01438e-10	1.34374e-07	-1.23786e-10	4.03569e-10	2.37609e-11	-2.02876e-13	1.33702e-07	-1.23662e-10
2022-04-01 14:55:48	12218117	3.40666e-11	-8.58565e-11	1.35808e-07	-1.19873e-10	3.95077e-10	2.20752e-11	-1.71713e-13	1.35129e-07	-1.19753e-10
2022-04-01 14:56:01	12231380	2.50582e-11	-9.92676e-11	1.36345e-07	-1.22786e-10	3.87882e-10	1.62377e-11	-1.98535e-13	1.35663e-07	-1.22663e-10
2022-04-01 14:56:14	12244644	1.84577e-11	-8.8805e-11	1.36256e-07	-1.38062e-10	3.73876e-10	1.19606e-11	-1.7761e-13	1.35575e-07	-1.37924e-10
2022-04-01 14:56:27	12257907	5.37499e-14	-9.4303e-11	1.36166e-07	-1.30289e-10	3.70275e-10	3.48299e-14	-1.88606e-13	1.35485e-07	-1.30159e-10
2022-04-01 14:56:41	12271170	-6.82623e-12	-9.71076e-11	1.34285e-07	-1.22764e-10	3.51347e-10	-4.4234e-12	-1.94215e-13	1.33614e-07	-1.22641e-10
2022-04-01 14:56:54	12284433	-3.47224e-12	-1.02196e-10	1.33658e-07	-1.28247e-10	3.49965e-10	-2.25001e-12	-2.04392e-13	1.3299e-07	-1.28119e-10
2022-04-01 14:57:07	12297696	-1.46092e-11	-1.00353e-10	1.33568e-07	-1.43437e-10	3.45197e-10	-9.46676e-12	-2.00706e-13	1.329e-07	-1.43294e-10
2022-04-01 14:57:20	12310960	-2.71437e-11	-9.72e-11	1.34823e-07	-1.3288e-10	3.32981e-10	-1.75891e-11	-1.944e-13	1.34149e-07	-1.32747e-10
2022-04-01 14:57:34	12324223	-3.91944e-11	-1.06148e-10	1.34464e-07	-1.33977e-10	3.27536e-10	-2.5398e-11	-2.12296e-13	1.33792e-07	-1.33843e-10
2022-04-01 14:57:47	12337486	-4.80631e-11	-1.02483e-10	1.32045e-07	-1.47747e-10	3.16924e-10	-3.11449e-11	-2.04966e-13	1.31385e-07	-1.47599e-10
2022-04-01 14:58:00	12350750	-4.12261e-11	-1.03936e-10	1.3097e-07	-1.35912e-10	3.1231e-10	-2.67145e-11	-2.07872e-13	1.30315e-07	-1.35776e-10
2022-04-01 14:58:14	12364013	-3.07234e-11	-9.6319e-11	1.3097e-07	-1.29644e-10	3.1532e-10	-1.99088e-11	-1.92638e-13	1.30315e-07	-1.29514e-10
2022-04-01 14:58:27	12377276	-4.48059e-11	-9.82952e-11	1.31777e-07	-1.37266e-10	3.06282e-10	-2.90342e-11	-1.9659e-13	1.31118e-07	-1.37129e-10
2022-04-01 14:58:40	12390540	-5.46099e-11	-8.93068e-11	1.32314e-07	-1.32439e-10	3.02427e-10	-3.53872e-11	-1.78614e-13	1.31652e-07	-1.32307e-10
2022-04-01 14:58:53	12403803	-4.33224e-11	-9.88171e-11	1.32852e-07	-1.34804e-10	2.89074e-10	-2.80729e-11	-1.97634e-13	1.32188e-07	-1.34669e-10
2022-04-01 14:59:07	12417066	-5.30511e-11	-9.2757e-11	1.33927e-07	-1.26591e-10	2.90994e-10	-3.43771e-11	-1.85514e-13	1.33257e-07	-1.26464e-10
2022-04-01 14:59:20	12430329	-5.35994e-11	-8.85491e-11	1.32493e-07	-1.3317e-10	2.88468e-10	-3.47324e-11	-1.77098e-13	1.31831e-07	-1.33037e-10
2022-04-01 14:59:33	12443593	-5.70071e-11	-1.00373e-10	1.32941e-07	-1.35578e-10	2.82716e-10	-3.69406e-11	-2.00746e-13	1.32276e-07	-1.35442e-10
2022-04-01 14:59:46	12456856	-4.86329e-11	-9.5081e-11	1.31956e-07	-1.25409e-10	2.74961e-10	-3.15141e-11	-1.90162e-13	1.31296e-07	-1.25284e-10
2022-04-01 15:00:00	12470119	-6.50374e-11	-8.86106e-11	1.30881e-07	-1.26624e-10	2.70554e-10	-4.21442e-11	-1.77221e-13	1.30227e-07	-1.26497e-10
2022-04-01 15:00:13	12483382	-7.26913e-11	-1.01838e-10	1.30522e-07	-1.32482e-10	2.71091e-10	-4.7104e-11	-2.03676e-13	1.29869e-07	-1.3235e-10
2022-04-01 15:00:26	12496645	-6.61876e-11	-8.51706e-11	1.30433e-07	-1.33955e-10	2.7083e-10	-4.28896e-11	-1.70341e-13	1.29781e-07	-1.33821e-10
2022-04-01 15:00:39	12509909	-6.66283e-11	-1.00384e-10	1.32672e-07	-1.31558e-10	2.64058e-10	-4.31751e-11	-2.00768e-13	1.32009e-07	-1.31426e-10
2022-04-01 15:00:53	12523172	-6.61446e-11	-9.96771e-11	1.32762e-07	-1.26484e-10	2.57055e-10	-4.28617e-11	-1.99354e-13	1.32098e-07	-1.26358e-10
2022-04-01 15:01:06	12536435	-6.44246e-11	-1.02821e-10	1.33478e-07	-1.35256e-10	2.62123e-10	-4.17471e-11	-2.05642e-13	1.32811e-07	-1.35121e-10
2022-04-01 15:01:19	12549698	-7.08101e-11	-1.04387e-10	1.35628e-07	-1.2872e-10	2.50121e-10	-4.58849e-11	-2.08774e-13	1.3495e-07	-1.28591e-10
2022-04-01 15:01:32	12562961	-7.33041e-11	-1.06783e-10	1.34195e-07	-1.33891e-10	2.52371e-10	-4.75011e-11	-2.13566e-13	1.33524e-07	-1.33757e-10
2022-04-01 15:01:46	12576225	-6.74453e-11	-1.06475e-10	1.32135e-07	-1.20238e-10	2.50559e-10	-4.37046e-11	-2.1295e-13	1.31474e-07	-1.20118e-10
2022-04-01 15:01:59	12589488	-6.60908e-11	-9.28798e-11	1.30253e-07	-1.34976e-10	2.55319e-10	-4.28268e-11	-1.8576e-13	1.29602e-07	-1.34841e-10
2022-04-01 15:02:12	12602751	-6.17371e-11	-9.51629e-11	1.27208e-07	-1.29333e-10	2.42419e-10	-4.00056e-11	-1.90326e-13	1.26572e-07	-1.29204e-10
2022-04-01 15:02:26	12616015	-7.83996e-11	-8.77301e-11	1.28462e-07	-1.45393e-10	2.33336e-10	-5.08029e-11	-1.7546e-13	1.2782e-07	-1.45248e-10
2022-04-01 15:02:39	12629278	-8.24523e-11	-9.8039e-11	1.29089e-07	-1.38621e-10	2.33121e-10	-5.34291e-11	-1.96078e-13	1.28444e-07	-1.38482e-10
2022-04-01 15:02:52	12642541	-7.25193e-11	-9.77933e-11	1.31149e-07	-1.3789e-10	2.29013e-10	-4.69925e-11	-1.95587e-13	1.30493e-07	-1.37752e-10
2022-04-01 15:03:05	12655805	-6.90471e-11	-9.4651e-11	1.30522e-07	-1.26957e-10	2.26632e-10	-4.47425e-11	-1.89302e-13	1.29869e-07	-1.2683e-10
2022-04-01 15:03:19	12669068	-7.71096e-11	-9.94219e-11	1.29089e-07	-1.34514e-10	2.34941e-10	-4.9967e-11	-1.98844e-13	1.28444e-07	-1.34379e-10
2022-04-01 15:03:32	12682331	-5.19761e-11	-9.70667e-11	1.30253e-07	-1.33654e-10	2.2654e-10	-3.36805e-11	-1.94133e-13	1.29602e-07	-1.3352e-10
2022-04-01 15:03:45	12695594	-7.99261e-11	-1.03476e-10	1.29357e-07	-1.37868e-10	2.26786e-10	-5.17921e-11	-2.06952e-13	1.2871e-07	-1.3773e-10
2022-04-01 15:03:58	12708858	-8.47528e-11	-9.6719e-11	1.29716e-07	-1.34278e-10	2.27454e-10	-5.49198e-11	-1.93438e-13	1.29067e-07	-1.34144e-10
2022-04-01 15:04:12	12722121	-6.85203e-11	-9.37295e-11	1.31328e-07	-1.20389e-10	2.3329e-10	-4.44012e-11	-1.87459e-13	1.30671e-07	-1.20269e-10
2022-04-01 15:04:25	12735384	-6.63489e-11	-9.93495e-11	1.30522e-07	-1.29354e-10	2.26072e-10	-4.29941e-11	-1.98699e-13	1.29869e-07	-1.29225e-10
2022-04-01 15:04:38	12748647	-7.90768e-11	-1.05779e-10	1.32045e-07	-1.33977e-10	2.26771e-10	-5.12418e-11	-2.11558e-13	1.31385e-07	-1.33843e-10
2022-04-01 15:04:51	12761911	-6.94556e-11	-8.43412e-11	1.32762e-07	-1.30569e-10	2.22002e-10	-4.50072e-11	-1.68682e-13	1.32098e-07	-1.30438e-10
2022-04-01 15:05:05	12775174	-6.64779e-11	-8.29079e-11	1.32224e-07	-1.29666e-10	2.12972e-10	-4.30777e-11	-1.65816e-13	1.31563e-07	-1.29536e-10
2022-04-01 15:05:18	12788437	-6.76711e-11	-9.61552e-11	1.31956e-07	-1.32794e-10	2.1781e-10	-4.38509e-11	-1.9231e-13	1.31296e-07	-1.32661e-10
2022-04-01 15:05:31	12801700	-6.85418e-11	-9.38627e-11	1.32583e-07	-1.34364e-10	2.11629e-10	-4.44151e-11	-1.87725e-13	1.3192e-07	-1.3423e-10
2022-04-01 15:05:44	12814963	-7.13906e-11	-9.64733e-11	1.33837e-07	-1.3273e-10	2.16274e-10	-4.62611e-11	-1.92947e-13	1.33168e-07	-1.32597e-10
2022-04-01 15:05:58	12828227	-7.15518e-11	-9.29924e-11	1.30253e-07	-1.24517e-10	2.12604e-10	-4.63656e-11	-1.85985e-13	1.29602e-07	-1.24392e-10
2022-04-01 15:06:11	12841490	-7.94316e-11	-9.32689e-11	1.29448e-07	-1.36019e-10	2.12066e-10	-5.14717e-11	-1.86538e-13	1.28801e-07	-1.35883e-10
2022-04-01 15:06:24	12854753	-8.33231e-11	-9.46408e-11	1.29985e-07	-1.32009e-10	2.14016e-10	-5.39934e-11	-1.89282e-13	1.29335e-07	-1.31877e-10
2022-04-01 15:06:38	12868016	-8.35381e-11	-7.9816e-11	1.31418e-07	-1.32203e-10	2.08196e-10	-5.41327e-11	-1.59632e-13	1.30761e-07	-1.32071e-10
2022-04-01 15:06:51	12881280	-7.63141e-11	-1.00691e-10	1.32135e-07	-1.29225e-10	2.04541e-10	-4.94515e-11	-2.01382e-13	1.31474e-07	-1.29096e-10
2022-04-01 15:07:04	12894543	-7.04553e-11	-8.99722e-11	1.30433e-07	-1.35439e-10	2.09225e-10	-4.5655e-11	-1.79944e-13	1.29781e-07	-1.35304e-10
2022-04-01 15:07:17	12907806	-7.63248e-11	-9.47533e-11	1.27656e-07	-1.28763e-10	2.06576e-10	-4.94585e-11	-1.89507e-13	1.27018e-07	-1.28634e-10
2022-04-01 15:07:31	12921070	-8.14633e-11	-9.54905e-11	1.27745e-07	-1.35729e-10	2.01546e-10	-5.27882e-11	-1.90981e-13	1.27106e-07	-1.35593e-10
2022-04-01 15:07:44	12934333	-7.81953e-11	-8.73922e-11	1.26402e-07	-1.33848e-10	2.03627e-10	-5.06706e-11	-1.74784e-13	1.2577e-07	-1.33714e-10
2022-04-01 15:07:57	12947596	-7.10788e-11	-9.88686e-11	1.29268e-07	-1.40136e-10	2.09532e-10	-4.60591e-11	-1.97737e-13	1.28622e-07	-1.39996e-10
2022-04-01 15:08:10	12960860	-7.50671e-11	-9.05865e-11	1.28373e-07	-1.28784e-10	2.00641e-10	-4.86435e-11	-1.81173e-13	1.27731e-07	-1.28655e-10
2022-04-01 15:08:24	12974123	-7.53251e-11	-9.2542e-11	1.25953e-07	-1.24076e-10	2.05232e-10	-4.88107e-11	-1.85084e-13	1.25323e-07	-1.23952e-10
2022-04-01 15:08:37	12987386	-8.26781e-11	-9.56229e-11	1.26849e-07	-1.31547e-10	2.09701e-10	-5.35754e-11	-1.91246e-13	1.26215e-07	-1.31415e-10
2022-04-01 15:08:50	13000649	-7.66043e-11	-9.77019e-11	1.27924e-07	-1.31182e-10	2.02023e-10	-4.96396e-11	-1.95404e-13	1.27284e-07	-1.31051e-10
2022-04-01 15:09:03	13013913	-8.14741e-11	-8.74946e-11	1.28014e-07	-1.28043e-10	2.06376e-10	-5.27952e-11	-1.74989e-13	1.27374e-07	-1.27915e-10
2022-04-01 15:09:17	13027176	-7.93778e-11	-9.07708e-11	1.29537e-07	-1.31579e-10	1.94697e-10	-5.14368e-11	-1.81542e-13	1.28889e-07	-1.31447e-10
2022-04-01 15:09:30	13040439	-7.98078e-11	-9.8459e-11	1.32762e-07	-1.31751e-10	1.98989e-10	-5.17155e-11	-1.96918e-13	1.32098e-07	-1.31619e-10
2022-04-01 15:09:43	13053702	-8.38068e-11	-9.81114e-11	1.32493e-07	-1.32697e-10	2.00979e-10	-5.43068e-11	-1.96223e-13	1.31831e-07	-1.32564e-10
2022-04-01 15:09:56	13066965	-8.05603e-11	-1.1007e-10	1.29716e-07	-1.29462e-10	2.00072e-10	-5.22031e-11	-2.2014e-13	1.29067e-07	-1.29333e-10
2022-04-01 15:10:10	13080228	-8.30328e-11	-9.86848e-11	1.29985e-07	-1.3187e-10	1.95058e-10	-5.38053e-11	-1.9737e-13	1.29335e-07	-1.31738e-10
2022-04-01 15:10:23	13093492	-8.06571e-11	-9.09346e-11	1.29806e-07	-1.41985e-10	1.9654e-10	-5.22658e-11	-1.81869e-13	1.29157e-07	-1.41843e-10
2022-04-01 15:10:36	13106755	-8.55053e-11	-8.13006e-11	1.27924e-07	-1.32117e-10	1.93423e-10	-5.54074e-11	-1.62601e-13	1.27284e-07	-1.31985e-10
2022-04-01 15:10:50	13120018	-8.78488e-11	-1.0277e-10	1.31687e-07	-1.20131e-10	1.81459e-10	-5.6926e-11	-2.0554e-13	1.31029e-07	-1.20011e-10
2022-04-01 15:11:03	13133281	-8.16461e-11	-1.01233e-10	1.30343e-07	-1.36567e-10	1.91595e-10	-5.29067e-11	-2.02466e-13	1.29691e-07	-1.3643e-10
2022-04-01 15:11:16	13146545	-8.21298e-11	-1.03149e-10	1.30074e-07	-1.32429e-10	1.92939e-10	-5.32201e-11	-2.06298e-13	1.29424e-07	-1.32297e-10
2022-04-01 15:11:29	13159808	-7.88188e-11	-9.72105e-11	1.30702e-07	-1.2643e-10	1.96018e-10	-5.10746e-11	-1.94421e-13	1.30048e-07	-1.26304e-10
2022-04-01 15:11:43	13173071	-8.21728e-11	-9.81933e-11	1.30164e-07	-1.32181e-10	1.82711e-10	-5.3248e-11	-1.96387e-13	1.29513e-07	-1.32049e-10
2022-04-01 15:11:56	13186335	-9.09878e-11	-9.73743e-11	1.30881e-07	-1.21001e-10	1.89322e-10	-5.89601e-11	-1.94749e-13	1.30227e-07	-1.2088e-10
2022-04-01 15:12:09	13199598	-8.58278e-11	-9.51014e-11	1.32403e-07	-1.28279e-10	1.82258e-10	-5.56164e-11	-1.90203e-13	1.31741e-07	-1.28151e-10
2022-04-01 15:12:22	13212861	-9.60726e-11	-1.04162e-10	1.30433e-07	-1.36557e-10	1.85122e-10	-6.2255e-11	-2.08324e-13	1.29781e-07	-1.3642e-10
2022-04-01 15:12:36	13226125	-8.54408e-11	-1.08923e-10	1.30791e-07	-1.36761e-10	1.86105e-10	-5.53656e-11	-2.17846e-13	1.30137e-07	-1.36624e-10
2022-04-01 15:12:49	13239388	-8.94076e-11	-1.0147e-10	1.30164e-07	-1.39825e-10	1.83517e-10	-5.79361e-11	-2.0294e-13	1.29513e-07	-1.39685e-10
2022-04-01 15:13:02	13252651	-8.46668e-11	-9.79476e-11	1.30164e-07	-1.44565e-10	1.89199e-10	-5.48641e-11	-1.95895e-13	1.29513e-07	-1.4442e-10
2022-04-01 15:13:15	13265914	-9.47826e-11	-9.19687e-11	1.30881e-07	-1.44791e-10	1.79878e-10	-6.14191e-11	-1.83937e-13	1.30227e-07	-1.44646e-10
2022-04-01 15:13:29	13279177	-8.27103e-11	-1.05585e-10	1.30702e-07	-1.40513e-10	1.8761e-10	-5.35963e-11	-2.1117e-13	1.30048e-07	-1.40372e-10
2022-04-01 15:13:42	13292440	-8.76661e-11	-1.08503e-10	1.33927e-07	-1.34837e-10	1.83548e-10	-5.68076e-11	-2.17006e-13	1.33257e-07	-1.34702e-10
2022-04-01 15:13:55	13305704	-8.70856e-11	-9.5859e-11	1.31239e-07	-1.25893e-10	1.86066e-10	-5.64315e-11	-1.91718e-13	1.30583e-07	-1.25767e-10
2022-04-01 15:14:08	13318967	-9.13426e-11	-1.06311e-10	1.31956e-07	-1.38094e-10	1.87418e-10	-5.919e-11	-2.12622e-13	1.31296e-07	-1.37956e-10
2022-04-01 15:14:22	13332230	-9.43741e-11	-1.0233e-10	1.33658e-07	-1.31999e-10	1.72314e-10	-6.11544e-11	-2.0466e-13	1.3299e-07	-1.31867e-10
2022-04-01 15:14:35	13345494	-7.68301e-11	-9.53362e-11	1.32762e-07	-1.3833e-10	1.85583e-10	-4.97859e-11	-1.90672e-13	1.32098e-07	-1.38192e-10
2022-04-01 15:14:48	13358757	-8.42691e-11	-9.26033e-11	1.31956e-07	-1.31053e-10	1.80476e-10	-5.46064e-11	-1.85207e-13	1.31296e-07	-1.30922e-10
2022-04-01 15:15:02	13372020	-8.35488e-11	-1.06066e-10	1.32852e-07	-1.40921e-10	1.82972e-10	-5.41396e-11	-2.12132e-13	1.32188e-07	-1.4078e-10
2022-04-01 15:15:15	13385283	-9.03536e-11	-1.08022e-10	1.35539e-07	-1.42534e-10	1.81429e-10	-5.85491e-11	-2.16044e-13	1.34861e-07	-1.42391e-10
2022-04-01 15:15:28	13398546	-8.17213e-11	-9.99952e-11	1.35181e-07	-1.35836e-10	1.85636e-10	-5.29554e-11	-1.9999e-13	1.34505e-07	-1.357e-10
2022-04-01 15:15:41	13411810	-7.34331e-11	-1.06025e-10	1.35898e-07	-1.39954e-10	1.81728e-10	-4.75846e-11	-2.1205e-13	1.35219e-07	-1.39814e-10
2022-04-01 15:15:55	13425073	-8.14096e-11	-9.96771e-11	1.35181e-07	-1.43512e-10	1.89092e-10	-5.27534e-11	-1.99354e-13	1.34505e-07	-1.43368e-10
2022-04-01 15:16:08	13438336	-9.15576e-11	-1.04387e-10	1.35987e-07	-1.37943e-10	1.75609e-10	-5.93293e-11	-2.08774e-13	1.35307e-07	-1.37805e-10
2022-04-01 15:16:21	13451600	-7.98508e-11	-9.97086e-11	1.32493e-07	-1.41297e-10	1.78503e-10	-5.17433e-11	-1.99417e-13	1.31831e-07	-1.41156e-10
2022-04-01 15:16:34	13464863	-8.64406e-11	-1.02104e-10	1.32403e-07	-1.465e-10	1.73312e-10	-5.60135e-11	-2.04208e-13	1.31741e-07	-1.46354e-10
2022-04-01 15:16:48	13478126	-8.35488e-11	-1.01541e-10	1.35002e-07	-1.28354e-10	1.70433e-10	-5.41396e-11	-2.03082e-13	1.34327e-07	-1.28226e-10
2022-04-01 15:17:01	13491390	-8.85261e-11	-1.041e-10	1.34553e-07	-1.44522e-10	1.79049e-10	-5.73649e-11	-2.082e-13	1.3388e-07	-1.44377e-10
2022-04-01 15:17:14	13504653	-9.28906e-11	-1.12751e-10	1.35987e-07	-1.37073e-10	1.74756e-10	-6.01931e-11	-2.25502e-13	1.35307e-07	-1.36936e-10
2022-04-01 15:17:27	13517916	-9.16006e-11	-9.78143e-11	1.33299e-07	-1.30719e-10	1.6859e-10	-5.93572e-11	-1.95629e-13	1.32633e-07	-1.30588e-10
2022-04-01 15:17:41	13531179	-9.7771e-11	-1.07499e-10	1.30343e-07	-1.34052e-10	1.72506e-10	-6.33556e-11	-2.14998e-13	1.29691e-07	-1.33918e-10
2022-04-01 15:17:54	13544442	-9.26541e-11	-1.01429e-10	1.27477e-07	-1.38459e-10	1.79878e-10	-6.00399e-11	-2.02858e-13	1.2684e-07	-1.38321e-10
2022-04-01 15:18:07	13557706	-8.59031e-11	-1.02175e-10	1.31149e-07	-1.23517e-10	1.83371e-10	-5.56652e-11	-2.0435e-13	1.30493e-07	-1.23393e-10
2022-04-01 15:18:20	13570969	-9.51373e-11	-1.08257e-10	1.29537e-07	-1.36514e-10	1.74456e-10	-6.1649e-11	-2.16514e-13	1.28889e-07	-1.36377e-10

## Sheet: CONC VECTOR
Index	Real time	ms	Ethylene mbar	Carbon monoxide mbar	Argon mbar	Ethylene oxide mbar	Carbon dioxide mbar	Corrected Et	Corrected CO	Corrected Ar	Corrected EtO	Corrected CO2	ć Et	ć CO	ć EtO	ć CO2
1	2022-04-01 11:32:11	1551	-5.83509e-11	1.35142e-11	7.58375e-09	-9.43633e-11	4.36564e-10	-3.78114e-11	2.70284e-14	7.54583e-09	-9.42689e-11	1.51488e-10	-0.0050109	3.5819e-06	-0.0124928	0.0200757
2	2022-04-01 11:32:36	26321	-5.78994e-11	-2.41311e-11	7.76963e-09	-9.60188e-11	3.90086e-10	-3.75188e-11	-4.82622e-14	7.73078e-09	-9.59228e-11	1.3536e-10	-0.00485317	-6.24286e-06	-0.0124079	0.0175092
3	2022-04-01 11:32:49	39834	-5.88239e-11	-2.88509e-11	8.62567e-09	-9.93513e-11	3.77685e-10	-3.81179e-11	-5.77018e-14	8.58254e-09	-9.92519e-11	1.31057e-10	-0.00444133	-6.72316e-06	-0.0115644	0.0152701
4	2022-04-01 11:33:03	53348	-6.45644e-11	-2.60866e-11	6.75338e-09	-9.41161e-11	3.53597e-10	-4.18377e-11	-5.21732e-14	6.71961e-09	-9.4022e-11	1.22698e-10	-0.00622621	-7.76432e-06	-0.0139922	0.0182597
5	2022-04-01 11:33:17	67901	-5.21696e-11	-1.51932e-11	6.4818e-09	-8.15493e-11	3.52983e-10	-3.38059e-11	-3.03864e-14	6.44939e-09	-8.14678e-11	1.22485e-10	-0.00524172	-4.71151e-06	-0.0126319	0.0189917
6	2022-04-01 11:33:31	81945	-5.38359e-11	-3.24751e-11	6.39582e-09	-8.45271e-11	3.42118e-10	-3.48857e-11	-6.49502e-14	6.36384e-09	-8.44426e-11	1.18715e-10	-0.00548186	-1.02061e-05	-0.0132691	0.0186546
7	2022-04-01 11:33:45	95988	-5.58139e-11	-3.53418e-11	6.51807e-09	-9.36968e-11	3.36144e-10	-3.61674e-11	-7.06836e-14	6.48548e-09	-9.36031e-11	1.16642e-10	-0.00557667	-1.08987e-05	-0.0144327	0.0179851
8	2022-04-01 11:34:00	110031	-5.36531e-11	-2.92502e-11	6.56941e-09	-8.68276e-11	3.22753e-10	-3.47672e-11	-5.85004e-14	6.53656e-09	-8.67408e-11	1.11995e-10	-0.00531888	-8.94972e-06	-0.0132701	0.0171337
9	2022-04-01 11:34:14	124075	-6.34894e-11	-3.68775e-11	6.55623e-09	-9.25143e-11	3.25217e-10	-4.11411e-11	-7.3755e-14	6.52345e-09	-9.24218e-11	1.1285e-10	-0.00630665	-1.13061e-05	-0.0141676	0.0172992
10	2022-04-01 11:34:28	138118	-7.41211e-11	-3.51166e-11	1.1321e-08	-8.67523e-11	3.87329e-10	-4.80305e-11	-7.02332e-14	1.12644e-08	-8.66655e-11	1.34403e-10	-0.00426392	-6.23497e-06	-0.00769376	0.0119317
11	2022-04-01 11:34:42	152671	-4.23656e-11	-3.6171e-11	9.82725e-08	-7.85823e-11	4.15171e-10	-2.74529e-11	-7.2342e-14	9.77811e-08	-7.85037e-11	1.44064e-10	-0.000280759	-7.39836e-07	-0.000802851	0.00147333
12	2022-04-01 11:34:56	166445	-4.51391e-11	-4.07475e-11	2.44741e-07	-7.06811e-11	3.55432e-10	-2.92501e-11	-8.1495e-14	2.43517e-07	-7.06104e-11	1.23335e-10	-0.000120115	-3.34658e-07	-0.000289961	0.000506473
13	2022-04-01 11:35:09	179708	-6.50266e-11	-4.5969e-11	3.19633e-07	-8.53978e-11	3.06512e-10	-4.21372e-11	-9.1938e-14	3.18035e-07	-8.53124e-11	1.0636e-10	-0.000132493	-2.89082e-07	-0.000268249	0.000334428
14	2022-04-01 11:35:22	192971	-7.60561e-11	-4.80472e-11	3.78937e-07	-7.88081e-11	2.78117e-10	-4.92844e-11	-9.60944e-14	3.77042e-07	-7.87293e-11	9.65066e-11	-0.000130713	-2.54864e-07	-0.000208808	0.000255957
15	2022-04-01 11:35:36	206235	-6.61876e-11	-5.2767e-11	4.10112e-07	-8.07753e-11	2.55649e-10	-4.28896e-11	-1.05534e-13	4.08061e-07	-8.06945e-11	8.87102e-11	-0.000105106	-2.58623e-07	-0.000197751	0.000217394
16	2022-04-01 11:35:49	219498	-6.29304e-11	-4.08601e-11	4.28834e-07	-8.15171e-11	2.34733e-10	-4.07789e-11	-8.17202e-14	4.2669e-07	-8.14356e-11	8.14524e-11	-9.55704e-05	-1.91521e-07	-0.000190854	0.000190894
17	2022-04-01 11:36:02	232761	-7.74643e-11	-5.40366e-11	4.38599e-07	-8.03776e-11	2.13218e-10	-5.01969e-11	-1.08073e-13	4.36406e-07	-8.02972e-11	7.39866e-11	-0.000115023	-2.47644e-07	-0.000183997	0.000169536
18	2022-04-01 11:36:16	246025	-7.41103e-11	-5.47634e-11	4.28118e-07	-8.37853e-11	2.05079e-10	-4.80235e-11	-1.09527e-13	4.25977e-07	-8.37015e-11	7.11624e-11	-0.000112737	-2.57119e-07	-0.000196493	0.000167057
19	2022-04-01 11:36:29	259288	-5.70286e-11	-5.09753e-11	4.26147e-07	-7.13798e-11	1.05639e-09	-3.69545e-11	-1.01951e-13	4.24016e-07	-7.13084e-11	3.66567e-10	-8.71536e-05	-2.4044e-07	-0.000168174	0.000864512
20	2022-04-01 11:36:42	272551	2.73965e-09	-4.09728e-11	4.22922e-07	-1.40932e-11	4.79027e-09	1.77529e-09	-8.19456e-14	4.20807e-07	-1.40791e-11	1.66222e-09	0.00421878	-1.94734e-07	-3.34574e-05	0.00395008
21	2022-04-01 11:37:00	290106	6.84924e-09	-4.32763e-11	3.96137e-07	4.61389e-11	6.58894e-09	4.43831e-09	-8.65526e-14	3.94156e-07	4.60928e-11	2.28636e-09	0.0112603	-2.1959e-07	0.00011694	0.00580065
22	2022-04-01 11:37:08	298949	8.4267e-09	-3.24137e-11	4.04109e-07	7.11218e-11	7.40921e-09	5.4605e-09	-6.48274e-14	4.02088e-07	7.10507e-11	2.571e-09	0.0135803	-1.61227e-07	0.000176704	0.00639411
23	2022-04-01 11:37:17	307792	9.58119e-09	-3.47991e-11	4.09305e-07	8.93108e-11	7.6785e-09	6.20861e-09	-6.95982e-14	4.07258e-07	8.92215e-11	2.66444e-09	0.0152449	-1.70894e-07	0.000219078	0.00654238
24	2022-04-01 11:37:27	317676	1.07371e-08	-2.72332e-11	4.13695e-07	1.17572e-10	7.55829e-09	6.95764e-09	-5.44664e-14	4.11627e-07	1.17454e-10	2.62273e-09	0.0169028	-1.3232e-07	0.000285342	0.00637162
25	2022-04-01 11:37:35	325989	1.15178e-08	-2.65166e-11	4.17278e-07	1.27462e-10	7.16607e-09	7.46353e-09	-5.30332e-14	4.15192e-07	1.27335e-10	2.48663e-09	0.0179761	-1.27732e-07	0.000306689	0.00598911
26	2022-04-01 11:37:44	334302	1.23106e-08	-1.93704e-11	4.18353e-07	1.23388e-10	6.6285e-09	7.97727e-09	-3.87408e-14	4.16261e-07	1.23265e-10	2.30009e-09	0.0191641	-9.30685e-08	0.000296123	0.00552559
27	2022-04-01 11:37:52	342615	1.28072e-08	-2.40594e-11	4.17995e-07	1.47027e-10	6.02751e-09	8.29907e-09	-4.81188e-14	4.15905e-07	1.4688e-10	2.09155e-09	0.0199542	-1.15697e-07	0.000353157	0.0050289
28	2022-04-01 11:38:00	350928	1.33796e-08	-3.08166e-11	4.17368e-07	1.33987e-10	5.45591e-09	8.66998e-09	-6.16332e-14	4.15281e-07	1.33853e-10	1.8932e-09	0.0208774	-1.48413e-07	0.000322319	0.00455884
29	2022-04-01 11:38:09	359241	1.37169e-08	-2.13156e-11	4.16741e-07	1.29558e-10	4.90029e-09	8.88855e-09	-4.26312e-14	4.14657e-07	1.29428e-10	1.7004e-09	0.0214359	-1.02811e-07	0.000312134	0.00410074
30	2022-04-01 11:38:17	367555	1.40817e-08	-2.3353e-11	4.16113e-07	1.34944e-10	4.43599e-09	9.12494e-09	-4.6706e-14	4.14032e-07	1.34809e-10	1.53929e-09	0.0220392	-1.12808e-07	0.0003256	0.0037178
31	2022-04-01 11:38:25	375868	1.43874e-08	-2.29128e-11	4.15307e-07	1.20668e-10	3.97326e-09	9.32304e-09	-4.58256e-14	4.1323e-07	1.20547e-10	1.37872e-09	0.0225613	-1.10896e-07	0.000291719	0.00333645
32	2022-04-01 11:38:34	384181	1.45131e-08	-2.83288e-11	4.15038e-07	1.21732e-10	3.58439e-09	9.40449e-09	-5.66576e-14	4.12963e-07	1.2161e-10	1.24378e-09	0.0227732	-1.37198e-07	0.000294482	0.00301185
33	2022-04-01 11:38:42	392494	1.45668e-08	-3.31815e-11	4.14949e-07	1.02855e-10	3.21224e-09	9.43929e-09	-6.6363e-14	4.12874e-07	1.02752e-10	1.11465e-09	0.0228624	-1.60734e-07	0.00024887	0.00269973
34	2022-04-01 11:38:50	400807	1.35092e-08	-4.44332e-11	4.11366e-07	9.60726e-11	2.98244e-09	8.75396e-09	-8.88664e-14	4.09309e-07	9.59765e-11	1.03491e-09	0.0213872	-2.17113e-07	0.000234484	0.00252842
35	2022-04-01 11:38:59	409120	1.19056e-08	-3.65909e-11	3.86013e-07	3.60554e-11	2.07861e-09	7.71483e-09	-7.31818e-14	3.84083e-07	3.60193e-11	7.21278e-10	0.0200864	-1.90536e-07	9.37801e-05	0.00187792
36	2022-04-01 11:39:07	417944	7.12157e-09	-3.07142e-11	3.48658e-07	1.81997e-11	1.71601e-09	4.61478e-09	-6.14284e-14	3.46915e-07	1.81815e-11	5.95455e-10	0.0133023	-1.77071e-07	5.24091e-05	0.00171643
37	2022-04-01 11:39:16	426787	5.31611e-09	-4.50066e-11	3.40595e-07	-1.06532e-11	1.47209e-09	3.44484e-09	-9.00132e-14	3.38892e-07	-1.06425e-11	5.10815e-10	0.010165	-2.6561e-07	-3.14039e-05	0.00150731
38	2022-04-01 11:39:25	435630	4.06293e-09	-4.64501e-11	3.38983e-07	-2.34779e-11	1.28386e-09	2.63278e-09	-9.29002e-14	3.37288e-07	-2.34544e-11	4.45499e-10	0.00780573	-2.75433e-07	-6.95382e-05	0.00132083
39	2022-04-01 11:39:34	444473	3.13781e-09	-4.61839e-11	3.38445e-07	-2.70254e-11	1.12917e-09	2.0333e-09	-9.23678e-14	3.36753e-07	-2.69984e-11	3.91822e-10	0.00603796	-2.7429e-07	-8.01727e-05	0.00116353
40	2022-04-01 11:39:43	453316	2.41314e-09	-4.08499e-11	3.43641e-07	-4.09681e-11	1.02449e-09	1.56371e-09	-8.16998e-14	3.41923e-07	-4.09271e-11	3.55498e-10	0.0045733	-2.38942e-07	-0.000119697	0.0010397
41	2022-04-01 11:39:52	462160	1.91908e-09	-5.13849e-11	3.52509e-07	-5.05786e-11	9.49614e-10	1.24356e-09	-1.0277e-13	3.50746e-07	-5.0528e-11	3.29516e-10	0.00354548	-2.93003e-07	-0.000144059	0.000939471
42	2022-04-01 11:40:01	471003	1.49992e-09	-4.70337e-11	3.59587e-07	-5.20299e-11	8.71029e-10	9.71948e-10	-9.40674e-14	3.57789e-07	-5.19779e-11	3.02247e-10	0.00271654	-2.62913e-07	-0.000145275	0.000844763
43	2022-04-01 11:40:09	479846	1.1822e-09	-4.77401e-11	3.65499e-07	-5.59536e-11	8.07321e-10	7.66066e-10	-9.54802e-14	3.63672e-07	-5.58976e-11	2.8014e-10	0.00210648	-2.62545e-07	-0.000153704	0.000770312
44	2022-04-01 11:40:18	488689	9.1707e-10	-5.74151e-11	3.69888e-07	-5.48141e-11	7.27071e-10	5.94261e-10	-1.1483e-13	3.68039e-07	-5.47593e-11	2.52294e-10	0.00161467	-3.12006e-07	-0.000148787	0.000685509
45	2022-04-01 11:40:28	498573	6.69261e-10	-5.5777e-11	3.73562e-07	-6.19414e-11	6.71329e-10	4.33681e-10	-1.11554e-13	3.71694e-07	-6.18795e-11	2.32951e-10	0.00116677	-3.00123e-07	-0.000166479	0.000626728
46	2022-04-01 11:40:39	509626	4.87823e-10	-5.94013e-11	3.74637e-07	-6.35324e-11	6.0947e-10	3.16109e-10	-1.18803e-13	3.72764e-07	-6.34689e-11	2.11486e-10	0.000848015	-3.18707e-07	-0.000170266	0.000567346
47	2022-04-01 11:40:53	523930	3.16834e-10	-5.91863e-11	3.59676e-07	-7.95821e-11	6.26194e-10	2.05308e-10	-1.18373e-13	3.57878e-07	-7.95025e-11	2.17289e-10	0.000573683	-3.30763e-07	-0.00022215	0.000607161
48	2022-04-01 11:41:07	537193	1.87447e-10	-5.50399e-11	2.58895e-07	-7.34331e-11	7.41929e-10	1.21466e-10	-1.1008e-13	2.57601e-07	-7.33597e-11	2.57449e-10	0.000471527	-4.27328e-07	-0.000284781	0.000999413
49	2022-04-01 11:41:20	550456	8.40648e-11	-5.58896e-11	1.66535e-07	-8.33231e-11	8.26421e-10	5.4474e-11	-1.11779e-13	1.65702e-07	-8.32398e-11	2.86768e-10	0.000328746	-6.74578e-07	-0.000502345	0.00173062
50	2022-04-01 11:41:33	563720	3.75174e-11	-4.23447e-11	1.04632e-07	-8.93108e-11	8.45871e-10	2.43113e-11	-8.46894e-14	1.04109e-07	-8.92215e-11	2.93517e-10	0.000233518	-8.1347e-07	-0.000857002	0.00281933
51	2022-04-01 11:41:46	576983	1.02124e-12	-4.8252e-11	6.49663e-08	-8.46668e-11	8.31957e-10	6.61764e-13	-9.6504e-14	6.46415e-08	-8.45821e-11	2.88689e-10	1.02374e-05	-1.49291e-06	-0.00130848	0.004466
52	2022-04-01 11:42:00	590756	-2.34242e-11	-4.82623e-11	4.20049e-08	-9.57608e-11	7.98579e-10	-1.51789e-11	-9.65246e-14	4.17949e-08	-9.5665e-11	2.77107e-10	-0.000363176	-2.30948e-06	-0.00228892	0.00663016
53	2022-04-01 11:42:14	604270	-4.54294e-11	-5.05658e-11	2.82444e-08	-9.05148e-11	7.63429e-10	-2.94383e-11	-1.01132e-13	2.81032e-08	-9.04243e-11	2.6491e-10	-0.00104751	-3.59858e-06	-0.00321758	0.00942633
54	2022-04-01 11:42:27	617783	-3.88934e-11	-5.96777e-11	1.98123e-08	-9.43741e-11	7.25629e-10	-2.52029e-11	-1.19355e-13	1.97132e-08	-9.42797e-11	2.51793e-10	-0.00127848	-6.05458e-06	-0.00478256	0.0127728
55	2022-04-01 11:42:41	631296	-6.53921e-11	-3.81061e-11	1.46798e-08	-9.25466e-11	6.92499e-10	-4.23741e-11	-7.62122e-14	1.46064e-08	-9.24541e-11	2.40297e-10	-0.00290106	-5.21773e-06	-0.00632969	0.0164515
56	2022-04-01 11:42:54	644810	-6.21456e-11	-6.36808e-11	1.15667e-08	-7.57443e-11	6.68241e-10	-4.02703e-11	-1.27362e-13	1.15089e-08	-7.56686e-11	2.3188e-10	-0.00349907	-1.10664e-05	-0.00657481	0.0201479
57	2022-04-01 11:43:08	658323	-7.13798e-11	-4.79347e-11	9.64358e-09	-9.47288e-11	6.29227e-10	-4.62541e-11	-9.58694e-14	9.59536e-09	-9.46341e-11	2.18342e-10	-0.00482047	-9.99122e-06	-0.00986248	0.0227549
58	2022-04-01 11:43:21	671836	-5.51581e-11	-5.7968e-11	8.46333e-09	-8.88486e-11	6.06744e-10	-3.57424e-11	-1.15936e-13	8.42101e-09	-8.87598e-11	2.1054e-10	-0.00424444	-1.37675e-05	-0.0105403	0.0250018
59	2022-04-01 11:43:35	685350	-7.77116e-11	-4.44128e-11	7.66662e-09	-1.02361e-10	5.79239e-10	-5.03571e-11	-8.88256e-14	7.62829e-09	-1.02259e-10	2.00996e-10	-0.00660137	-1.16442e-05	-0.0134052	0.0263488
60	2022-04-01 11:43:48	698863	-7.25193e-11	-4.70132e-11	7.1408e-09	-1.0134e-10	5.64704e-10	-4.69925e-11	-9.40264e-14	7.1051e-09	-1.01239e-10	1.95952e-10	-0.00661392	-1.32337e-05	-0.0142487	0.0275791
61	2022-04-01 11:44:03	713416	-7.26806e-11	-5.19275e-11	6.82534e-09	-1.02823e-10	5.36693e-10	-4.7097e-11	-1.03855e-13	6.79121e-09	-1.0272e-10	1.86232e-10	-0.00693499	-1.52926e-05	-0.0151255	0.0274226
62	2022-04-01 11:44:17	727460	-6.41344e-11	-5.56132e-11	6.61182e-09	-1.06704e-10	5.16006e-10	-4.15591e-11	-1.11226e-13	6.57876e-09	-1.06597e-10	1.79054e-10	-0.00631716	-1.69069e-05	-0.0162032	0.027217
63	2022-04-01 11:44:31	741503	-8.40433e-11	-3.53213e-11	6.4631e-09	-9.84698e-11	5.04542e-10	-5.44601e-11	-7.06426e-14	6.43078e-09	-9.83713e-11	1.75076e-10	-0.00846865	-1.09851e-05	-0.0152969	0.0272247
64	2022-04-01 11:44:45	755546	-7.74643e-11	-5.96982e-11	6.35115e-09	-1.06736e-10	4.9658e-10	-5.01969e-11	-1.19396e-13	6.31939e-09	-1.06629e-10	1.72313e-10	-0.0079433	-1.88936e-05	-0.0168733	0.0272674
65	2022-04-01 11:44:59	769590	-7.93456e-11	-6.39265e-11	6.2709e-09	-1.03844e-10	4.74796e-10	-5.14159e-11	-1.27853e-13	6.23955e-09	-1.0374e-10	1.64754e-10	-0.00824034	-2.04908e-05	-0.0166262	0.0264048
66	2022-04-01 11:45:13	783633	-7.21001e-11	-5.43232e-11	6.21448e-09	-9.72335e-11	4.59823e-10	-4.67209e-11	-1.08646e-13	6.18341e-09	-9.71363e-11	1.59559e-10	-0.00755584	-1.75706e-05	-0.0157092	0.0258043
67	2022-04-01 11:45:27	797676	-8.14526e-11	-5.7067e-11	6.16592e-09	-9.10523e-11	4.45679e-10	-5.27813e-11	-1.14134e-13	6.13509e-09	-9.09612e-11	1.54651e-10	-0.00860318	-1.86035e-05	-0.0148264	0.0252076
68	2022-04-01 11:45:41	811720	-8.07538e-11	-6.33942e-11	6.11164e-09	-1.09897e-10	4.28716e-10	-5.23285e-11	-1.26788e-13	6.08108e-09	-1.09787e-10	1.48764e-10	-0.00860512	-2.08496e-05	-0.0180539	0.0244635
69	2022-04-01 11:45:55	825763	-9.11383e-11	-6.71822e-11	6.07573e-09	-1.07671e-10	4.25231e-10	-5.90576e-11	-1.34364e-13	6.04535e-09	-1.07563e-10	1.47555e-10	-0.0097691	-2.22261e-05	-0.0177927	0.024408
70	2022-04-01 11:46:09	839806	-7.81308e-11	-5.95549e-11	6.05411e-09	-1.08284e-10	4.27089e-10	-5.06288e-11	-1.1911e-13	6.02384e-09	-1.08176e-10	1.482e-10	-0.00840473	-1.97731e-05	-0.0179579	0.0246022
71	2022-04-01 11:46:23	853850	-9.22241e-11	-5.53266e-11	6.03638e-09	-9.46106e-11	4.05336e-10	-5.97612e-11	-1.10653e-13	6.0062e-09	-9.4516e-11	1.40652e-10	-0.00994992	-1.84232e-05	-0.0157364	0.0234177
72	2022-04-01 11:46:37	867893	-9.22993e-11	-6.55134e-11	6.03172e-09	-1.09639e-10	4.03776e-10	-5.98099e-11	-1.31027e-13	6.00156e-09	-1.09529e-10	1.4011e-10	-0.00996573	-2.18321e-05	-0.0182501	0.0233456
73	2022-04-01 11:46:51	881936	-8.65481e-11	-5.63709e-11	6.00834e-09	-1.07467e-10	3.91491e-10	-5.60832e-11	-1.12742e-13	5.9783e-09	-1.0736e-10	1.35847e-10	-0.00938113	-1.88585e-05	-0.0179582	0.0227234
74	2022-04-01 11:47:05	895980	-8.73651e-11	-6.23704e-11	5.95667e-09	-1.04285e-10	3.74069e-10	-5.66126e-11	-1.24741e-13	5.92689e-09	-1.04181e-10	1.29802e-10	-0.00955183	-2.10466e-05	-0.0175776	0.0219005
75	2022-04-01 11:47:20	910023	-8.52688e-11	-6.29642e-11	5.96652e-09	-1.14035e-10	3.67211e-10	-5.52542e-11	-1.25928e-13	5.93669e-09	-1.13921e-10	1.27422e-10	-0.00930724	-2.12119e-05	-0.0191893	0.0214635
76	2022-04-01 11:47:34	924066	-8.51291e-11	-5.01972e-11	5.93842e-09	-1.09015e-10	3.79505e-10	-5.51637e-11	-1.00394e-13	5.90873e-09	-1.08906e-10	1.31688e-10	-0.00933596	-1.69909e-05	-0.0184314	0.0222871
77	2022-04-01 11:47:48	938110	-8.08613e-11	-6.38958e-11	5.95025e-09	-9.92545e-11	3.62059e-10	-5.23981e-11	-1.27792e-13	5.9205e-09	-9.91552e-11	1.25634e-10	-0.00885029	-2.15846e-05	-0.0167478	0.0212203
78	2022-04-01 11:48:02	952153	-9.01493e-11	-6.86974e-11	5.93626e-09	-1.10155e-10	3.73707e-10	-5.84167e-11	-1.37395e-13	5.90658e-09	-1.10045e-10	1.29676e-10	-0.00989012	-2.32613e-05	-0.0186309	0.0219546
79	2022-04-01 11:48:16	966196	-7.86038e-11	-6.41825e-11	5.91988e-09	-1.07478e-10	3.62374e-10	-5.09353e-11	-1.28365e-13	5.89028e-09	-1.07371e-10	1.25744e-10	-0.00864734	-2.17927e-05	-0.0182284	0.0213477
80	2022-04-01 11:48:30	980240	-8.96763e-11	-6.44896e-11	5.90177e-09	-1.03866e-10	3.62397e-10	-5.81102e-11	-1.28979e-13	5.87226e-09	-1.03762e-10	1.25752e-10	-0.00989572	-2.19641e-05	-0.0176699	0.0214145
81	2022-04-01 11:48:44	994283	-8.76768e-11	-6.24215e-11	5.89956e-09	-9.86633e-11	3.51793e-10	-5.68146e-11	-1.24843e-13	5.87006e-09	-9.85646e-11	1.22072e-10	-0.0096787	-2.12677e-05	-0.0167911	0.0207957
82	2022-04-01 11:48:58	1008326	-7.66688e-11	-5.84799e-11	5.89445e-09	-1.04919e-10	3.49459e-10	-4.96814e-11	-1.1696e-13	5.86498e-09	-1.04814e-10	1.21262e-10	-0.00847086	-1.99421e-05	-0.0178712	0.0206757
83	2022-04-01 11:49:12	1022370	-8.14633e-11	-5.57872e-11	5.86146e-09	-1.12326e-10	3.43891e-10	-5.27882e-11	-1.11574e-13	5.83215e-09	-1.12214e-10	1.1933e-10	-0.00905124	-1.91309e-05	-0.0192405	0.0204607
84	2022-04-01 11:49:26	1036413	-7.93778e-11	-6.4633e-11	5.85852e-09	-1.01888e-10	3.36605e-10	-5.14368e-11	-1.29266e-13	5.82923e-09	-1.01786e-10	1.16802e-10	-0.00882395	-2.21755e-05	-0.0174613	0.0200373
85	2022-04-01 11:49:40	1050456	-7.86576e-11	-5.53266e-11	5.84709e-09	-1.0694e-10	3.35169e-10	-5.09701e-11	-1.10653e-13	5.81785e-09	-1.06833e-10	1.16304e-10	-0.00876098	-1.90196e-05	-0.018363	0.0199908
86	2022-04-01 11:49:54	1064500	-8.75801e-11	-5.5859e-11	5.84673e-09	-9.81903e-11	3.29333e-10	-5.67519e-11	-1.11718e-13	5.8175e-09	-9.80921e-11	1.14279e-10	-0.00975538	-1.92038e-05	-0.0168616	0.0196439
87	2022-04-01 11:50:08	1078543	-8.22266e-11	-5.91044e-11	5.82968e-09	-1.0866e-10	3.27129e-10	-5.32828e-11	-1.18209e-13	5.80053e-09	-1.08551e-10	1.13514e-10	-0.00918585	-2.0379e-05	-0.018714	0.0195695
88	2022-04-01 11:50:22	1092586	-8.25491e-11	-6.56465e-11	5.85083e-09	-1.08488e-10	3.38233e-10	-5.34918e-11	-1.31293e-13	5.82158e-09	-1.0838e-10	1.17367e-10	-0.00918855	-2.25528e-05	-0.0186169	0.0201607
89	2022-04-01 11:50:36	1106630	-8.45916e-11	-5.66268e-11	5.84598e-09	-1.1224e-10	3.30254e-10	-5.48154e-11	-1.13254e-13	5.81675e-09	-1.12128e-10	1.14598e-10	-0.00942371	-1.94703e-05	-0.0192767	0.0197014
90	2022-04-01 11:50:50	1120673	-8.80101e-11	-5.33915e-11	5.82809e-09	-1.04124e-10	3.27874e-10	-5.70305e-11	-1.06783e-13	5.79895e-09	-1.0402e-10	1.13772e-10	-0.00983463	-1.84142e-05	-0.0179377	0.0196195
91	2022-04-01 11:51:04	1134716	-7.97971e-11	-6.62198e-11	5.82378e-09	-1.1324e-10	3.18736e-10	-5.17085e-11	-1.3244e-13	5.79466e-09	-1.13127e-10	1.10601e-10	-0.00892348	-2.28555e-05	-0.0195226	0.0190868
92	2022-04-01 11:51:18	1148760	-9.51911e-11	-6.53906e-11	5.81835e-09	-1.0909e-10	3.11281e-10	-6.16838e-11	-1.30781e-13	5.78926e-09	-1.08981e-10	1.08015e-10	-0.0106549	-2.25903e-05	-0.0188247	0.0186577
93	2022-04-01 11:51:32	1162803	-9.14608e-11	-5.90634e-11	5.83398e-09	-1.07478e-10	3.1618e-10	-5.92666e-11	-1.18127e-13	5.80481e-09	-1.07371e-10	1.09714e-10	-0.0102099	-2.03498e-05	-0.0184968	0.0189006
94	2022-04-01 11:51:46	1176846	-9.18908e-11	-6.22065e-11	5.82844e-09	-1.10982e-10	3.11266e-10	-5.95452e-11	-1.24413e-13	5.7993e-09	-1.10871e-10	1.08009e-10	-0.0102677	-2.14531e-05	-0.019118	0.0186245
95	2022-04-01 11:52:00	1190890	-9.74808e-11	-6.23191e-11	5.82194e-09	-1.04887e-10	3.20419e-10	-6.31676e-11	-1.24638e-13	5.79283e-09	-1.04782e-10	1.11185e-10	-0.0109044	-2.15159e-05	-0.0180882	0.0191936
96	2022-04-01 11:52:14	1204933	-8.20116e-11	-7.20658e-11	5.81578e-09	-1.17862e-10	3.17946e-10	-5.31435e-11	-1.44132e-13	5.7867e-09	-1.17744e-10	1.10327e-10	-0.00918373	-2.49074e-05	-0.0203474	0.0190657
97	2022-04-01 11:52:28	1218976	-8.73866e-11	-5.80909e-11	5.82822e-09	-1.1109e-10	3.14383e-10	-5.66265e-11	-1.16182e-13	5.79908e-09	-1.10979e-10	1.09091e-10	-0.00976474	-2.00345e-05	-0.0191373	0.0188118
98	2022-04-01 11:52:43	1233020	-8.45271e-11	-5.92682e-11	5.83055e-09	-9.67391e-11	3.133e-10	-5.47736e-11	-1.18536e-13	5.8014e-09	-9.66424e-11	1.08715e-10	-0.00944144	-2.04324e-05	-0.0166585	0.0187395
99	2022-04-01 11:52:57	1247063	-7.90553e-11	-5.73025e-11	5.81474e-09	-1.08349e-10	3.08301e-10	-5.12278e-11	-1.14605e-13	5.78567e-09	-1.08241e-10	1.0698e-10	-0.00885427	-1.98084e-05	-0.0187084	0.0184906
100	2022-04-01 11:53:11	1261106	-7.96143e-11	-5.99747e-11	5.82911e-09	-9.7857e-11	3.13991e-10	-5.15901e-11	-1.19949e-13	5.79996e-09	-9.77591e-11	1.08955e-10	-0.00889489	-2.06811e-05	-0.0168551	0.0187854
101	2022-04-01 11:53:25	1275150	-7.16486e-11	-5.42515e-11	5.82607e-09	-1.02017e-10	3.20564e-10	-4.64283e-11	-1.08503e-13	5.79694e-09	-1.01915e-10	1.11236e-10	-0.0080091	-1.87173e-05	-0.0175808	0.0191887
102	2022-04-01 11:53:39	1289193	-7.11756e-11	-6.77249e-11	5.81908e-09	-1.07833e-10	3.15926e-10	-4.61218e-11	-1.3545e-13	5.78998e-09	-1.07725e-10	1.09626e-10	-0.00796579	-2.33938e-05	-0.0186054	0.0189338
103	2022-04-01 11:53:53	1303236	-8.42583e-11	-5.64118e-11	6.18556e-09	-1.0392e-10	3.19489e-10	-5.45994e-11	-1.12824e-13	6.15463e-09	-1.03816e-10	1.10863e-10	-0.00887127	-1.83315e-05	-0.016868	0.0180129
104	2022-04-01 11:54:07	1317280	-8.20331e-11	-6.1111e-11	5.17194e-09	-9.46428e-11	3.06159e-10	-5.31574e-11	-1.22222e-13	5.14608e-09	-9.45482e-11	1.06237e-10	-0.0103297	-2.37505e-05	-0.0183728	0.0206443
105	2022-04-01 11:54:21	1331323	-7.71311e-11	-5.54699e-11	5.04861e-09	-1.06328e-10	3.06551e-10	-4.9981e-11	-1.1094e-13	5.02337e-09	-1.06222e-10	1.06373e-10	-0.00994969	-2.20847e-05	-0.0211455	0.0211757
106	2022-04-01 11:54:35	1345366	-7.66151e-11	-7.05096e-11	5.1369e-09	-1.04532e-10	3.0083e-10	-4.96466e-11	-1.41019e-13	5.11122e-09	-1.04427e-10	1.04388e-10	-0.00971326	-2.75901e-05	-0.020431	0.0204233
107	2022-04-01 11:54:49	1359410	-8.62363e-11	-6.50527e-11	5.34398e-09	-1.01157e-10	3.06159e-10	-5.58811e-11	-1.30105e-13	5.31726e-09	-1.01056e-10	1.06237e-10	-0.0105094	-2.44685e-05	-0.0190052	0.0199797
108	2022-04-01 11:55:03	1373453	-8.69996e-11	-5.86232e-11	5.46038e-09	-1.11369e-10	3.08209e-10	-5.63757e-11	-1.17246e-13	5.43308e-09	-1.11258e-10	1.06949e-10	-0.0103764	-2.15801e-05	-0.0204778	0.0196847
109	2022-04-01 11:55:17	1387496	-7.13046e-11	-6.59741e-11	5.53124e-09	-1.05833e-10	3.09822e-10	-4.62054e-11	-1.31948e-13	5.50358e-09	-1.05727e-10	1.07508e-10	-0.00839551	-2.3975e-05	-0.0192106	0.0195342
110	2022-04-01 11:55:31	1401540	-8.24093e-11	-6.71003e-11	1.81433e-08	-1.11273e-10	3.54803e-10	-5.34012e-11	-1.34201e-13	1.80526e-08	-1.11162e-10	1.23117e-10	-0.00295809	-7.43387e-06	-0.00615766	0.00681989
111	2022-04-01 11:55:46	1416093	-9.54168e-11	-6.26774e-11	1.09381e-07	-1.09725e-10	3.33495e-10	-6.18301e-11	-1.25355e-13	1.08834e-07	-1.09615e-10	1.15723e-10	-0.000568113	-1.1518e-06	-0.00100718	0.0010633
112	2022-04-01 11:55:59	1429867	-1.02296e-10	-6.63222e-11	2.29423e-07	-1.13401e-10	2.88974e-10	-6.62878e-11	-1.32644e-13	2.28276e-07	-1.13288e-10	1.00274e-10	-0.000290385	-5.81071e-07	-0.000496275	0.000439267
113	2022-04-01 11:56:13	1443130	-8.89453e-11	-8.38601e-11	3.00999e-07	-9.04826e-11	2.59136e-10	-5.76366e-11	-1.6772e-13	2.99494e-07	-9.03921e-11	8.99202e-11	-0.000192446	-5.60012e-07	-0.000301816	0.00030024
114	2022-04-01 11:56:26	1456393	-9.35893e-11	-7.67344e-11	3.29755e-07	-1.01146e-10	2.43986e-10	-6.06459e-11	-1.53469e-13	3.28106e-07	-1.01045e-10	8.46631e-11	-0.000184836	-4.67741e-07	-0.000307964	0.000258036
115	2022-04-01 11:56:39	1469656	-9.80721e-11	-7.40417e-11	3.51883e-07	-1.15669e-10	2.30034e-10	-6.35507e-11	-1.48083e-13	3.50124e-07	-1.15553e-10	7.98218e-11	-0.000181509	-4.22946e-07	-0.000330036	0.000227982
116	2022-04-01 11:56:52	1482920	-9.25896e-11	-8.61022e-11	3.76787e-07	-9.43418e-11	2.19721e-10	-5.99981e-11	-1.72204e-13	3.74903e-07	-9.42475e-11	7.62432e-11	-0.000160036	-4.5933e-07	-0.000251392	0.000203368
117	2022-04-01 11:57:06	1496183	-1.01307e-10	-8.0543e-11	3.92284e-07	-1.00576e-10	2.13264e-10	-6.56469e-11	-1.61086e-13	3.90323e-07	-1.00475e-10	7.40026e-11	-0.000168186	-4.127e-07	-0.000257416	0.000189593
118	2022-04-01 11:57:19	1509446	-1.00544e-10	-7.73384e-11	4.00526e-07	-9.80291e-11	2.10108e-10	-6.51525e-11	-1.54677e-13	3.98523e-07	-9.79311e-11	7.29075e-11	-0.000163485	-3.88125e-07	-0.000245735	0.000182944
119	2022-04-01 11:57:32	1522710	-7.25623e-12	-7.51782e-11	4.01422e-07	-8.43228e-11	1.05452e-09	-4.70204e-12	-1.50356e-13	3.99415e-07	-8.42385e-11	3.65918e-10	-1.17723e-05	-3.76442e-07	-0.000210905	0.000916136
120	2022-04-01 11:57:45	1535973	2.76157e-09	-6.77965e-11	3.83595e-07	-2.27039e-11	2.96156e-09	1.7895e-09	-1.35593e-13	3.81677e-07	-2.26812e-11	1.02766e-09	0.00468851	-3.55256e-07	-5.94251e-05	0.00269249
121	2022-04-01 11:58:02	1552486	6.11112e-09	-7.47789e-11	3.55824e-07	2.69179e-11	4.09001e-09	3.96001e-09	-1.49558e-13	3.54045e-07	2.6891e-11	1.41923e-09	0.011185	-4.22426e-07	7.59536e-05	0.00400863
122	2022-04-01 11:58:14	1564580	8.16396e-09	-5.92068e-11	3.62453e-07	4.52789e-11	4.19868e-09	5.29025e-09	-1.18414e-13	3.60641e-07	4.52336e-11	1.45694e-09	0.014669	-3.28342e-07	0.000125426	0.00403987
123	2022-04-01 11:58:23	1573423	9.39591e-09	-6.48274e-11	3.6747e-07	5.97591e-11	4.05386e-09	6.08855e-09	-1.29655e-13	3.65633e-07	5.96993e-11	1.40669e-09	0.0166521	-3.54604e-07	0.000163277	0.00384728
124	2022-04-01 11:58:33	1583307	1.04428e-08	-6.07834e-11	3.72218e-07	5.35241e-11	3.71974e-09	6.76693e-09	-1.21567e-13	3.70357e-07	5.34706e-11	1.29075e-09	0.0182714	-3.28242e-07	0.000144376	0.00348515
125	2022-04-01 11:58:41	1591620	1.12612e-08	-7.50553e-11	3.7383e-07	7.21646e-11	3.37277e-09	7.29726e-09	-1.50111e-13	3.71961e-07	7.20924e-11	1.17035e-09	0.0196183	-4.03566e-07	0.000193817	0.00314644
126	2022-04-01 11:58:49	1599933	1.17348e-08	-7.5475e-11	3.73562e-07	6.41344e-11	3.01177e-09	7.60415e-09	-1.5095e-13	3.71694e-07	6.40703e-11	1.04508e-09	0.0204581	-4.06113e-07	0.000172374	0.00281168
127	2022-04-01 11:58:58	1608246	1.21541e-08	-5.82239e-11	3.73113e-07	5.82649e-11	2.69258e-09	7.87586e-09	-1.16448e-13	3.71247e-07	5.82066e-11	9.34325e-10	0.0212146	-3.13666e-07	0.000156787	0.00251672
128	2022-04-01 11:59:06	1616559	1.24873e-08	-5.0832e-11	3.73203e-07	5.89099e-11	2.42553e-09	8.09177e-09	-1.01664e-13	3.71337e-07	5.8851e-11	8.41659e-10	0.0217909	-2.73778e-07	0.000158484	0.00226656
129	2022-04-01 11:59:14	1624872	1.28186e-08	-6.56977e-11	3.74188e-07	4.52144e-11	2.20541e-09	8.30645e-09	-1.31395e-13	3.72317e-07	4.51692e-11	7.65277e-10	0.0223102	-3.52913e-07	0.000121319	0.00205545
130	2022-04-01 11:59:23	1633185	1.29852e-08	-6.52165e-11	3.74547e-07	4.05381e-11	1.98389e-09	8.41441e-09	-1.30433e-13	3.72674e-07	4.04976e-11	6.8841e-10	0.0225785	-3.49992e-07	0.000108667	0.00184722
131	2022-04-01 11:59:31	1641498	1.31666e-08	-6.1193e-11	3.74995e-07	4.12046e-11	1.79761e-09	8.53196e-09	-1.22386e-13	3.7312e-07	4.11634e-11	6.23771e-10	0.0228665	-3.28007e-07	0.000110322	0.00167177
132	2022-04-01 11:59:39	1649811	1.33608e-08	-5.25828e-11	3.75263e-07	3.61736e-11	1.65236e-09	8.6578e-09	-1.05166e-13	3.73387e-07	3.61374e-11	5.73369e-10	0.0231872	-2.81653e-07	9.67828e-05	0.00153559
133	2022-04-01 11:59:48	1658125	1.29529e-08	-6.82572e-11	3.7822e-07	3.07772e-11	1.51505e-09	8.39348e-09	-1.36514e-13	3.76329e-07	3.07464e-11	5.25722e-10	0.0223036	-3.62753e-07	8.17009e-05	0.00139698
134	2022-04-01 11:59:56	1666438	1.15857e-08	-6.62915e-11	3.94076e-07	5.63299e-12	1.21381e-09	7.50753e-09	-1.32583e-13	3.92106e-07	5.62736e-12	4.21192e-10	0.0191467	-3.38131e-07	1.43516e-05	0.00107418
135	2022-04-01 12:00:05	1675261	7.54327e-09	-6.40391e-11	3.25903e-07	-3.02827e-11	1.0156e-09	4.88804e-09	-1.28078e-13	3.24273e-07	-3.02524e-11	3.52413e-10	0.0150738	-3.9497e-07	-9.32929e-05	0.00108678
136	2022-04-01 12:00:14	1684105	5.51799e-09	-6.29436e-11	3.1578e-07	-4.46231e-11	8.89693e-10	3.57566e-09	-1.25887e-13	3.14201e-07	-4.45785e-11	3.08723e-10	0.0113802	-4.00658e-07	-0.000141879	0.000982566
137	2022-04-01 12:00:22	1692948	4.20139e-09	-7.1687e-11	3.12734e-07	-5.06001e-11	8.09257e-10	2.7225e-09	-1.43374e-13	3.1117e-07	-5.05495e-11	2.80812e-10	0.00874923	-4.60757e-07	-0.00016245	0.000902439
138	2022-04-01 12:00:31	1701791	3.22299e-09	-7.5127e-11	3.11391e-07	-6.52524e-11	7.37107e-10	2.0885e-09	-1.50254e-13	3.09834e-07	-6.51871e-11	2.55776e-10	0.0067407	-4.8495e-07	-0.000210394	0.000825526
139	2022-04-01 12:00:40	1710634	2.48898e-09	-6.80934e-11	3.1578e-07	-6.37366e-11	6.88943e-10	1.61286e-09	-1.36187e-13	3.14201e-07	-6.36729e-11	2.39063e-10	0.00513321	-4.33438e-07	-0.00020265	0.000760861
140	2022-04-01 12:00:49	1719477	1.9683e-09	-6.3691e-11	3.23484e-07	-7.76041e-11	6.27606e-10	1.27546e-09	-1.27382e-13	3.21867e-07	-7.75265e-11	2.17779e-10	0.00396269	-3.9576e-07	-0.000240865	0.000676614
141	2022-04-01 12:01:01	1731571	1.42638e-09	-8.12493e-11	3.34503e-07	-8.57526e-11	5.75231e-10	9.24294e-10	-1.62499e-13	3.3283e-07	-8.56668e-11	1.99605e-10	0.00277707	-4.88232e-07	-0.000257389	0.00059972
142	2022-04-01 12:01:12	1742624	1.05124e-09	-7.43898e-11	3.42745e-07	-9.8717e-11	5.25697e-10	6.81204e-10	-1.4878e-13	3.41031e-07	-9.86183e-11	1.82417e-10	0.00199748	-4.36264e-07	-0.000289177	0.000534898
143	2022-04-01 12:01:24	1754718	7.2429e-10	-7.71336e-11	3.49284e-07	-1.02544e-10	4.85361e-10	4.6934e-10	-1.54267e-13	3.47538e-07	-1.02441e-10	1.6842e-10	0.00135047	-4.43886e-07	-0.000294764	0.00048461
144	2022-04-01 12:01:37	1767981	4.91456e-10	-8.10036e-11	3.52599e-07	-8.95258e-11	4.38207e-10	3.18463e-10	-1.62007e-13	3.50836e-07	-8.94363e-11	1.52058e-10	0.000907727	-4.61775e-07	-0.000254923	0.000433416
145	2022-04-01 12:01:51	1781244	3.39204e-10	-8.78325e-11	3.47672e-07	-9.74915e-11	4.4832e-10	2.19804e-10	-1.75665e-13	3.45934e-07	-9.7394e-11	1.55567e-10	0.000635394	-5.078e-07	-0.00028154	0.000449702
146	2022-04-01 12:02:04	1794508	2.06593e-10	-8.03279e-11	2.68302e-07	-9.67821e-11	5.93767e-10	1.33872e-10	-1.60656e-13	2.6696e-07	-9.66853e-11	2.06037e-10	0.000501468	-6.01796e-07	-0.000362171	0.000771789
147	2022-04-01 12:02:17	1807771	1.03135e-10	-7.61815e-11	1.7397e-07	-1.04403e-10	7.13799e-10	6.68315e-11	-1.52363e-13	1.731e-07	-1.04299e-10	2.47688e-10	0.000386086	-8.80201e-07	-0.000602533	0.0014309
148	2022-04-01 12:02:31	1821034	3.89364e-11	-6.16025e-11	1.10187e-07	-1.0307e-10	7.57229e-10	2.52308e-11	-1.23205e-13	1.09636e-07	-1.02967e-10	2.62758e-10	0.000230132	-1.12376e-06	-0.00093917	0.00239664
149	2022-04-01 12:02:44	1834297	-1.00942e-11	-6.84927e-11	6.85624e-08	-1.0779e-10	7.685e-10	-6.54104e-12	-1.36985e-13	6.82196e-08	-1.07682e-10	2.6667e-10	-9.58822e-05	-2.00801e-06	-0.00157846	0.00390899
150	2022-04-01 12:02:58	1848071	-3.68616e-11	-7.21068e-11	4.43212e-08	-1.07338e-10	7.56829e-10	-2.38863e-11	-1.44214e-13	4.40996e-08	-1.07231e-10	2.6262e-10	-0.000541645	-3.27018e-06	-0.00243156	0.00595515
151	2022-04-01 12:03:11	1861584	-5.35994e-11	-7.67139e-11	2.95837e-08	-1.06295e-10	7.1435e-10	-3.47324e-11	-1.53428e-13	2.94358e-08	-1.06189e-10	2.47879e-10	-0.00117994	-5.21229e-06	-0.00360747	0.00842102
152	2022-04-01 12:03:25	1875098	-6.29519e-11	-6.9322e-11	2.06735e-08	-1.08037e-10	6.87661e-10	-4.07928e-11	-1.38644e-13	2.05701e-08	-1.07929e-10	2.38618e-10	-0.00198311	-6.74006e-06	-0.00524688	0.0116002
153	2022-04-01 12:03:38	1888611	-6.30594e-11	-6.94449e-11	1.5252e-08	-1.12896e-10	6.70591e-10	-4.08625e-11	-1.3889e-13	1.51757e-08	-1.12783e-10	2.32695e-10	-0.00269262	-9.15209e-06	-0.0074318	0.0153334
154	2022-04-01 12:03:52	1902124	-7.21001e-11	-6.8595e-11	1.18691e-08	-1.21388e-10	6.48715e-10	-4.67209e-11	-1.3719e-13	1.18098e-08	-1.21267e-10	2.25104e-10	-0.00395612	-1.16167e-05	-0.0102683	0.0190609
155	2022-04-01 12:04:05	1915637	-8.02163e-11	-8.28977e-11	9.79367e-09	-1.16981e-10	6.15928e-10	-5.19802e-11	-1.65795e-13	9.7447e-09	-1.16864e-10	2.13727e-10	-0.0053342	-1.70139e-05	-0.0119926	0.0219326
156	2022-04-01 12:04:19	1929151	-8.90313e-11	-7.56901e-11	8.51033e-09	-1.20507e-10	5.84354e-10	-5.76923e-11	-1.5138e-13	8.46778e-09	-1.20386e-10	2.02771e-10	-0.00681315	-1.78772e-05	-0.014217	0.0239462
157	2022-04-01 12:04:32	1942664	-8.45486e-11	-8.54777e-11	7.75673e-09	-1.18443e-10	5.62047e-10	-5.47875e-11	-1.70955e-13	7.71795e-09	-1.18325e-10	1.9503e-10	-0.00709871	-2.21504e-05	-0.0153311	0.0252697
158	2022-04-01 12:04:46	1956177	-8.71931e-11	-7.36936e-11	7.13306e-09	-1.17938e-10	5.29375e-10	-5.65011e-11	-1.47387e-13	7.09739e-09	-1.1782e-10	1.83693e-10	-0.00796083	-2.07664e-05	-0.0166005	0.0258818
159	2022-04-01 12:05:00	1970731	-7.94423e-11	-8.0973e-11	6.82408e-09	-1.26065e-10	5.16521e-10	-5.14786e-11	-1.61946e-13	6.78996e-09	-1.25939e-10	1.79233e-10	-0.00758158	-2.38508e-05	-0.0185478	0.0263967
160	2022-04-01 12:05:14	1984775	-8.23341e-11	-8.95012e-11	6.61975e-09	-1.19174e-10	4.97324e-10	-5.33525e-11	-1.79002e-13	6.58665e-09	-1.19055e-10	1.72571e-10	-0.00810009	-2.71765e-05	-0.0180752	0.0262002
161	2022-04-01 12:05:28	1998818	-9.10201e-11	-7.73793e-11	6.4753e-09	-1.19916e-10	4.91205e-10	-5.8981e-11	-1.54759e-13	6.44292e-09	-1.19796e-10	1.70448e-10	-0.00915439	-2.40199e-05	-0.0185934	0.0264551
162	2022-04-01 12:05:42	2012861	-8.96118e-11	-8.2007e-11	6.38183e-09	-1.06575e-10	4.72039e-10	-5.80684e-11	-1.64014e-13	6.34992e-09	-1.06468e-10	1.63798e-10	-0.00914475	-2.58293e-05	-0.0167669	0.0257952
163	2022-04-01 12:05:56	2026905	-8.89023e-11	-6.0077e-11	6.31727e-09	-1.10208e-10	4.56052e-10	-5.76087e-11	-1.20154e-13	6.28568e-09	-1.10098e-10	1.5825e-10	-0.00916506	-1.91155e-05	-0.0175156	0.0251763
164	2022-04-01 12:06:10	2040948	-8.27211e-11	-7.43284e-11	6.23872e-09	-1.18325e-10	4.4422e-10	-5.36033e-11	-1.48657e-13	6.20753e-09	-1.18207e-10	1.54144e-10	-0.00863521	-2.39478e-05	-0.0190425	0.0248318
165	2022-04-01 12:06:24	2054991	-8.51183e-11	-6.8933e-11	6.18497e-09	-1.10542e-10	4.42791e-10	-5.51567e-11	-1.37866e-13	6.15405e-09	-1.10431e-10	1.53648e-10	-0.00896267	-2.24025e-05	-0.0179445	0.0249671
166	2022-04-01 12:06:39	2069035	-8.45378e-11	-7.4912e-11	6.15325e-09	-1.05242e-10	4.29922e-10	-5.47805e-11	-1.49824e-13	6.12248e-09	-1.05137e-10	1.49183e-10	-0.00894743	-2.44711e-05	-0.0171722	0.0243664
167	2022-04-01 12:06:53	2083078	-9.38688e-11	-7.48812e-11	6.15477e-09	-1.12724e-10	4.33815e-10	-6.0827e-11	-1.49762e-13	6.124e-09	-1.12611e-10	1.50534e-10	-0.00993256	-2.4455e-05	-0.0183885	0.024581
168	2022-04-01 12:07:07	2097121	-7.53896e-11	-6.98953e-11	6.11581e-09	-1.09004e-10	4.31089e-10	-4.88525e-11	-1.39791e-13	6.08523e-09	-1.08895e-10	1.49588e-10	-0.00802804	-2.29721e-05	-0.017895	0.0245821
169	2022-04-01 12:07:21	2111165	-9.29228e-11	-7.1216e-11	6.10243e-09	-1.0866e-10	4.19925e-10	-6.0214e-11	-1.42432e-13	6.07192e-09	-1.08551e-10	1.45714e-10	-0.0099168	-2.34575e-05	-0.0178776	0.023998
170	2022-04-01 12:07:35	2125208	-1.0034e-10	-6.23498e-11	6.07166e-09	-1.09639e-10	4.12154e-10	-6.50203e-11	-1.247e-13	6.0413e-09	-1.09529e-10	1.43017e-10	-0.0107626	-2.06412e-05	-0.0181301	0.0236733
171	2022-04-01 12:07:49	2139251	-8.92033e-11	-6.79501e-11	6.07233e-09	-1.11251e-10	4.17944e-10	-5.78037e-11	-1.359e-13	6.04197e-09	-1.1114e-10	1.45027e-10	-0.00956704	-2.24927e-05	-0.0183946	0.0240032
172	2022-04-01 12:08:03	2153295	-9.10308e-11	-6.4633e-11	6.03941e-09	-9.79323e-11	4.07486e-10	-5.8988e-11	-1.29266e-13	6.00921e-09	-9.78344e-11	1.41398e-10	-0.00981625	-2.15113e-05	-0.0162807	0.0235301
173	2022-04-01 12:08:17	2167338	-8.32693e-11	-6.19096e-11	6.04535e-09	-1.12724e-10	3.95254e-10	-5.39585e-11	-1.23819e-13	6.01512e-09	-1.12611e-10	1.37153e-10	-0.00897047	-2.05846e-05	-0.0187214	0.0228014
174	2022-04-01 12:08:31	2181381	-9.36753e-11	-7.03765e-11	6.0363e-09	-1.14723e-10	3.95522e-10	-6.07016e-11	-1.40753e-13	6.00612e-09	-1.14608e-10	1.37246e-10	-0.0101066	-2.34349e-05	-0.0190819	0.0228511
175	2022-04-01 12:08:45	2195425	-8.81606e-11	-5.95651e-11	6.02144e-09	-1.1883e-10	3.8951e-10	-5.71281e-11	-1.1913e-13	5.99133e-09	-1.18711e-10	1.3516e-10	-0.00953512	-1.98838e-05	-0.0198138	0.0225592
176	2022-04-01 12:08:59	2209468	-8.01196e-11	-6.86565e-11	6.01448e-09	-1.13627e-10	3.7641e-10	-5.19175e-11	-1.37313e-13	5.98441e-09	-1.13513e-10	1.30614e-10	-0.00867546	-2.29451e-05	-0.0189682	0.0218258
177	2022-04-01 12:09:13	2223511	-9.06223e-11	-6.38753e-11	5.98773e-09	-1.05177e-10	3.74122e-10	-5.87233e-11	-1.27751e-13	5.95779e-09	-1.05072e-10	1.2982e-10	-0.00985655	-2.14426e-05	-0.017636	0.02179
178	2022-04-01 12:09:27	2237555	-9.38688e-11	-6.59434e-11	5.98767e-09	-1.08381e-10	3.7823e-10	-6.0827e-11	-1.31887e-13	5.95773e-09	-1.08273e-10	1.31246e-10	-0.0102098	-2.21371e-05	-0.0181735	0.0220295
179	2022-04-01 12:09:41	2251598	-7.77331e-11	-5.52139e-11	5.98406e-09	-1.07994e-10	3.75896e-10	-5.0371e-11	-1.10428e-13	5.95414e-09	-1.07886e-10	1.30436e-10	-0.00845984	-1.85464e-05	-0.0181195	0.0219068
180	2022-04-01 12:09:55	2265641	-9.55243e-11	-6.67931e-11	5.9773e-09	-1.11842e-10	3.70421e-10	-6.18997e-11	-1.33586e-13	5.94741e-09	-1.1173e-10	1.28536e-10	-0.0104078	-2.24612e-05	-0.0187863	0.0216121
181	2022-04-01 12:10:09	2279685	-9.40193e-11	-6.64349e-11	5.98857e-09	-1.08327e-10	3.70744e-10	-6.09245e-11	-1.3287e-13	5.95863e-09	-1.08219e-10	1.28648e-10	-0.0102246	-2.22987e-05	-0.0181617	0.0215902
182	2022-04-01 12:10:23	2293728	-8.98591e-11	-7.0315e-11	5.96023e-09	-1.09854e-10	3.68601e-10	-5.82287e-11	-1.4063e-13	5.93043e-09	-1.09744e-10	1.27905e-10	-0.00981863	-2.37133e-05	-0.0185053	0.0215675
183	2022-04-01 12:10:37	2307771	-8.94828e-11	-6.49093e-11	5.96702e-09	-1.17819e-10	3.58435e-10	-5.79849e-11	-1.29819e-13	5.93718e-09	-1.17701e-10	1.24377e-10	-0.00976639	-2.18653e-05	-0.0198244	0.0209488
184	2022-04-01 12:10:51	2321815	-9.76206e-11	-6.62506e-11	5.9606e-09	-1.0493e-10	3.46049e-10	-6.32581e-11	-1.32501e-13	5.9308e-09	-1.04825e-10	1.20079e-10	-0.010666	-2.23412e-05	-0.0176747	0.0202467
185	2022-04-01 12:11:05	2335858	-8.91818e-11	-7.06325e-11	5.95718e-09	-1.15401e-10	3.4489e-10	-5.77898e-11	-1.41265e-13	5.92739e-09	-1.15286e-10	1.19677e-10	-0.00974961	-2.38326e-05	-0.0194496	0.0201905
186	2022-04-01 12:11:19	2349901	-9.61478e-11	-7.66934e-11	5.94448e-09	-1.07532e-10	3.47001e-10	-6.23038e-11	-1.53387e-13	5.91476e-09	-1.07424e-10	1.20409e-10	-0.0105336	-2.59329e-05	-0.0181621	0.0203574
187	2022-04-01 12:11:33	2363945	-8.69243e-11	-6.25955e-11	5.94621e-09	-1.07833e-10	3.48399e-10	-5.63269e-11	-1.25191e-13	5.91648e-09	-1.07725e-10	1.20894e-10	-0.00952035	-2.11597e-05	-0.0182076	0.0204335
188	2022-04-01 12:11:47	2377988	-9.40301e-11	-7.6673e-11	5.93245e-09	-1.08682e-10	3.48929e-10	-6.09315e-11	-1.53346e-13	5.90279e-09	-1.08573e-10	1.21078e-10	-0.0103225	-2.59786e-05	-0.0183936	0.0205121
189	2022-04-01 12:12:02	2392031	-9.29873e-11	-7.80141e-11	5.94136e-09	-1.17594e-10	3.45289e-10	-6.02558e-11	-1.56028e-13	5.91165e-09	-1.17476e-10	1.19815e-10	-0.0101927	-2.63933e-05	-0.019872	0.0202676
190	2022-04-01 12:12:16	2406075	-8.81713e-11	-6.35579e-11	5.94393e-09	-1.06758e-10	3.36589e-10	-5.7135e-11	-1.27116e-13	5.91421e-09	-1.06651e-10	1.16796e-10	-0.00966063	-2.14933e-05	-0.018033	0.0197484
191	2022-04-01 12:12:30	2420118	-8.70748e-11	-6.90763e-11	5.94958e-09	-1.03715e-10	3.4456e-10	-5.64245e-11	-1.38153e-13	5.91983e-09	-1.03611e-10	1.19562e-10	-0.00953143	-2.33372e-05	-0.0175024	0.0201969
192	2022-04-01 12:12:44	2434161	-9.33851e-11	-7.86591e-11	5.9479e-09	-1.06639e-10	3.30899e-10	-6.05135e-11	-1.57318e-13	5.91816e-09	-1.06532e-10	1.14822e-10	-0.0102251	-2.65823e-05	-0.0180009	0.0194016
193	2022-04-01 12:12:58	2448205	-9.00418e-11	-6.93322e-11	5.93602e-09	-1.18636e-10	3.32834e-10	-5.83471e-11	-1.38664e-13	5.90634e-09	-1.18517e-10	1.15493e-10	-0.00987872	-2.34772e-05	-0.0200661	0.0195541
194	2022-04-01 12:13:12	2462248	-1.02092e-10	-7.69493e-11	5.91408e-09	-1.13358e-10	3.28673e-10	-6.61556e-11	-1.53899e-13	5.88451e-09	-1.13245e-10	1.1405e-10	-0.0112423	-2.61532e-05	-0.0192445	0.0193813
195	2022-04-01 12:13:26	2476291	-9.27938e-11	-6.51755e-11	5.91041e-09	-1.26925e-10	3.31222e-10	-6.01304e-11	-1.30351e-13	5.88086e-09	-1.26798e-10	1.14934e-10	-0.0102248	-2.21653e-05	-0.0215612	0.0195438
196	2022-04-01 12:13:40	2490335	-1.0321e-10	-6.29334e-11	5.89627e-09	-1.12229e-10	3.19811e-10	-6.68801e-11	-1.25867e-13	5.86679e-09	-1.12117e-10	1.10974e-10	-0.0113998	-2.14541e-05	-0.0191104	0.0189157
197	2022-04-01 12:13:54	2504378	-8.96763e-11	-6.52677e-11	5.89572e-09	-1.22958e-10	3.15496e-10	-5.81102e-11	-1.30535e-13	5.86624e-09	-1.22835e-10	1.09477e-10	-0.00990587	-2.2252e-05	-0.0209393	0.0186622
198	2022-04-01 12:14:08	2518421	-8.26351e-11	-6.54212e-11	5.88428e-09	-1.12358e-10	3.12095e-10	-5.35475e-11	-1.30842e-13	5.85486e-09	-1.12246e-10	1.08297e-10	-0.00914583	-2.23477e-05	-0.0191714	0.0184969
199	2022-04-01 12:14:22	2532465	-9.01063e-11	-6.4981e-11	5.8888e-09	-1.15637e-10	3.04109e-10	-5.83889e-11	-1.29962e-13	5.85936e-09	-1.15521e-10	1.05526e-10	-0.00996507	-2.21803e-05	-0.0197157	0.0180098
200	2022-04-01 12:14:36	2546508	-9.20198e-11	-6.99158e-11	5.88529e-09	-1.151e-10	2.97068e-10	-5.96288e-11	-1.39832e-13	5.85586e-09	-1.14985e-10	1.03083e-10	-0.0101828	-2.38789e-05	-0.0196359	0.0176033
201	2022-04-01 12:14:50	2560551	-9.45998e-11	-7.23115e-11	6.38543e-09	-1.14121e-10	3.01536e-10	-6.13007e-11	-1.44623e-13	6.3535e-09	-1.14007e-10	1.04633e-10	-0.00964833	-2.27627e-05	-0.0179439	0.0164686
202	2022-04-01 12:15:04	2574595	-1.01587e-10	-6.78477e-11	5.2863e-09	-1.16304e-10	2.97375e-10	-6.58284e-11	-1.35695e-13	5.25987e-09	-1.16188e-10	1.03189e-10	-0.0125152	-2.57982e-05	-0.0220895	0.0196182
203	2022-04-01 12:15:18	2588638	-9.93083e-11	-7.23012e-11	5.12647e-09	-1.15691e-10	3.02159e-10	-6.43518e-11	-1.44602e-13	5.10084e-09	-1.15575e-10	1.04849e-10	-0.0126159	-2.83488e-05	-0.0226581	0.0205553
204	2022-04-01 12:15:32	2602681	-9.13748e-11	-6.90353e-11	5.17362e-09	-1.16239e-10	2.96469e-10	-5.92109e-11	-1.38071e-13	5.14775e-09	-1.16123e-10	1.02875e-10	-0.0115023	-2.68215e-05	-0.022558	0.0199844
205	2022-04-01 12:15:46	2616724	-8.70426e-11	-7.62327e-11	5.3735e-09	-1.10993e-10	3.06474e-10	-5.64036e-11	-1.52465e-13	5.34663e-09	-1.10882e-10	1.06346e-10	-0.0105494	-2.85162e-05	-0.0207387	0.0198904
206	2022-04-01 12:16:00	2630768	-9.38151e-11	-7.76353e-11	5.50093e-09	-1.18142e-10	2.98411e-10	-6.07922e-11	-1.55271e-13	5.47343e-09	-1.18024e-10	1.03549e-10	-0.0111068	-2.83681e-05	-0.0215631	0.0189184
207	2022-04-01 12:16:14	2644811	-9.52018e-11	-6.81958e-11	5.57918e-09	-1.29408e-10	2.98696e-10	-6.16908e-11	-1.36392e-13	5.55128e-09	-1.29279e-10	1.03648e-10	-0.0111129	-2.45694e-05	-0.0232881	0.0186709
208	2022-04-01 12:16:28	2658854	-9.39333e-11	-6.96087e-11	1.06693e-08	-1.09348e-10	3.34631e-10	-6.08688e-11	-1.39217e-13	1.0616e-08	-1.09239e-10	1.16117e-10	-0.00573371	-1.3114e-05	-0.01029	0.010938
209	2022-04-01 12:16:43	2673408	-8.64621e-11	-7.51884e-11	8.93142e-08	-1.08628e-10	3.29679e-10	-5.60274e-11	-1.50377e-13	8.88676e-08	-1.08519e-10	1.14399e-10	-0.000630459	-1.69214e-06	-0.00122113	0.00128729
210	2022-04-01 12:16:57	2687181	-1.05242e-10	-7.3755e-11	2.15448e-07	-1.21152e-10	2.94887e-10	-6.81968e-11	-1.4751e-13	2.14371e-07	-1.21031e-10	1.02326e-10	-0.000318126	-6.88107e-07	-0.000564587	0.000477331
211	2022-04-01 12:17:10	2700445	-1.07822e-10	-8.02563e-11	2.80933e-07	-1.16024e-10	2.67836e-10	-6.98687e-11	-1.60513e-13	2.79528e-07	-1.15908e-10	9.29391e-11	-0.000249952	-5.74227e-07	-0.000414656	0.000332485
212	2022-04-01 12:17:23	2713708	-1.21646e-10	-8.73922e-11	3.2223e-07	-1.03425e-10	2.53154e-10	-7.88266e-11	-1.74784e-13	3.20619e-07	-1.03322e-10	8.78444e-11	-0.000245858	-5.45147e-07	-0.000322257	0.000273984
213	2022-04-01 12:17:36	2726971	-1.05091e-10	-8.4935e-11	3.62453e-07	-1.04339e-10	2.37098e-10	-6.8099e-11	-1.6987e-13	3.60641e-07	-1.04235e-10	8.2273e-11	-0.000188828	-4.71023e-07	-0.000289026	0.00022813
214	2022-04-01 12:17:50	2740235	-1.05779e-10	-8.05327e-11	3.8458e-07	-1.0593e-10	2.31884e-10	-6.85448e-11	-1.61065e-13	3.82657e-07	-1.05824e-10	8.04637e-11	-0.000179128	-4.20913e-07	-0.000276551	0.000210276
215	2022-04-01 12:18:03	2753498	-1.08402e-10	-9.39752e-11	3.97391e-07	-1.15024e-10	2.22762e-10	-7.02445e-11	-1.8795e-13	3.95404e-07	-1.14909e-10	7.72984e-11	-0.000177652	-4.75338e-07	-0.000290612	0.000195492
216	2022-04-01 12:18:16	2766761	-1.09424e-10	-8.97265e-11	4.06438e-07	-1.0679e-10	2.02836e-10	-7.09068e-11	-1.79453e-13	4.04406e-07	-1.06683e-10	7.03841e-11	-0.000175336	-4.43745e-07	-0.000263802	0.000174043
217	2022-04-01 12:18:30	2780024	-9.90611e-11	-8.18022e-11	4.02138e-07	-1.13036e-10	6.47433e-10	-6.41916e-11	-1.63604e-13	4.00127e-07	-1.12923e-10	2.24659e-10	-0.000160428	-4.08881e-07	-0.000282218	0.000561469
218	2022-04-01 12:18:43	2793287	1.9046e-09	-7.80858e-11	3.7598e-07	-4.06671e-11	2.53352e-09	1.23418e-09	-1.56172e-13	3.741e-07	-4.06264e-11	8.79131e-10	0.00329907	-4.17459e-07	-0.000108598	0.00234999
219	2022-04-01 12:18:59	2809801	5.54196e-09	-7.92427e-11	3.55017e-07	2.08549e-12	3.53506e-09	3.59119e-09	-1.58485e-13	3.53242e-07	2.0834e-12	1.22667e-09	0.0101664	-4.4866e-07	5.89795e-06	0.00347259
220	2022-04-01 12:19:10	2820854	7.6316e-09	-7.87512e-11	3.63349e-07	3.68294e-11	3.7257e-09	4.94528e-09	-1.57502e-13	3.61532e-07	3.67926e-11	1.29282e-09	0.0136787	-4.35652e-07	0.000101768	0.00357594
221	2022-04-01 12:19:22	2832948	9.31579e-09	-7.30793e-11	3.67828e-07	3.35829e-11	3.53832e-09	6.03663e-09	-1.46159e-13	3.65989e-07	3.35493e-11	1.2278e-09	0.016494	-3.99353e-07	9.16676e-05	0.00335474
222	2022-04-01 12:19:32	2842831	1.03985e-08	-8.54368e-11	3.70874e-07	4.31181e-11	3.23866e-09	6.73823e-09	-1.70874e-13	3.6902e-07	4.3075e-11	1.12382e-09	0.0182598	-4.63047e-07	0.000116728	0.00304541
223	2022-04-01 12:19:41	2851145	1.11369e-08	-7.44308e-11	3.72038e-07	4.86114e-11	2.90029e-09	7.21671e-09	-1.48862e-13	3.70178e-07	4.85628e-11	1.0064e-09	0.0194953	-4.02135e-07	0.000131188	0.0027187
224	2022-04-01 12:19:49	2859458	1.16267e-08	-7.22603e-11	3.72666e-07	4.82244e-11	2.58787e-09	7.5341e-09	-1.44521e-13	3.70803e-07	4.81762e-11	8.97991e-10	0.0203184	-3.89751e-07	0.000129924	0.00242175
225	2022-04-01 12:19:57	2867771	1.20983e-08	-8.06146e-11	3.71233e-07	3.25939e-11	2.30673e-09	7.8397e-09	-1.61229e-13	3.69377e-07	3.25613e-11	8.00435e-10	0.0212241	-4.3649e-07	8.8152e-05	0.00216699
226	2022-04-01 12:20:06	2876084	1.23563e-08	-7.05506e-11	3.71142e-07	4.07639e-11	2.05254e-09	8.00688e-09	-1.41101e-13	3.69286e-07	4.07231e-11	7.12231e-10	0.021682	-3.82092e-07	0.000110275	0.00192867
227	2022-04-01 12:20:14	2884397	1.26903e-08	-6.96393e-11	3.71591e-07	2.86057e-11	1.85521e-09	8.22331e-09	-1.39279e-13	3.69733e-07	2.85771e-11	6.43758e-10	0.0222412	-3.767e-07	7.72912e-05	0.00174114
228	2022-04-01 12:20:22	2892710	1.28421e-08	-8.02665e-11	3.72308e-07	2.92292e-11	1.67186e-09	8.32168e-09	-1.60533e-13	3.70446e-07	2.92e-11	5.80135e-10	0.0224639	-4.3335e-07	7.88237e-05	0.00156604
229	2022-04-01 12:20:31	2901023	1.30625e-08	-8.07477e-11	3.72397e-07	2.06184e-11	1.52186e-09	8.4645e-09	-1.61495e-13	3.70535e-07	2.05978e-11	5.28085e-10	0.022844	-4.35844e-07	5.55893e-05	0.0014252
230	2022-04-01 12:20:39	2909336	1.31478e-08	-7.54649e-11	3.72576e-07	1.61249e-11	1.37834e-09	8.51977e-09	-1.5093e-13	3.70713e-07	1.61088e-11	4.78284e-10	0.0229821	-4.07134e-07	4.34535e-05	0.00129017
231	2022-04-01 12:20:47	2917650	1.27447e-08	-8.51296e-11	3.75622e-07	1.66517e-11	1.23471e-09	8.25857e-09	-1.70259e-13	3.73744e-07	1.6635e-11	4.28444e-10	0.0220969	-4.5555e-07	4.45092e-05	0.00114636
232	2022-04-01 12:20:55	2925963	1.13566e-08	-7.95396e-11	4.04916e-07	-1.14164e-11	1.03257e-09	7.35908e-09	-1.59079e-13	4.02891e-07	-1.1405e-11	3.58302e-10	0.0182657	-3.94844e-07	-2.83078e-05	0.000889326
233	2022-04-01 12:21:04	2934786	7.55358e-09	-8.79041e-11	3.24828e-07	-4.63001e-11	8.47021e-10	4.89472e-09	-1.75808e-13	3.23204e-07	-4.62538e-11	2.93916e-10	0.0151444	-5.43955e-07	-0.00014311	0.000909384
234	2022-04-01 12:21:13	2943630	5.50405e-09	-7.91506e-11	3.13093e-07	-5.87164e-11	7.71543e-10	3.56662e-09	-1.58301e-13	3.11528e-07	-5.86577e-11	2.67725e-10	0.0114488	-5.08145e-07	-0.000188291	0.000859396
235	2022-04-01 12:21:22	2952473	4.17832e-09	-8.43617e-11	3.10137e-07	-7.25946e-11	7.01121e-10	2.70755e-09	-1.68723e-13	3.08586e-07	-7.2522e-11	2.43289e-10	0.00877405	-5.46762e-07	-0.000235014	0.000788398
236	2022-04-01 12:21:31	2961316	3.18528e-09	-7.4011e-11	3.09867e-07	-6.22316e-11	6.46504e-10	2.06406e-09	-1.48022e-13	3.08318e-07	-6.21694e-11	2.24337e-10	0.00669459	-4.80096e-07	-0.000201641	0.000727616
237	2022-04-01 12:21:40	2970159	2.46178e-09	-8.31025e-11	3.1372e-07	-6.89933e-11	5.80169e-10	1.59523e-09	-1.66205e-13	3.12151e-07	-6.89243e-11	2.01319e-10	0.00511045	-5.3245e-07	-0.000220804	0.000644939
238	2022-04-01 12:21:52	2982253	1.80552e-09	-7.34172e-11	3.24649e-07	-8.23018e-11	5.43734e-10	1.16998e-09	-1.46834e-13	3.23026e-07	-8.22195e-11	1.88676e-10	0.00362193	-4.54559e-07	-0.000254529	0.000584089
239	2022-04-01 12:22:03	2993306	1.33796e-09	-7.86182e-11	3.33787e-07	-9.18693e-11	4.99021e-10	8.66998e-10	-1.57236e-13	3.32118e-07	-9.17774e-11	1.7316e-10	0.00261051	-4.73435e-07	-0.00027634	0.000521382
240	2022-04-01 12:22:14	3004360	9.61564e-10	-7.11341e-11	3.42387e-07	-9.62123e-11	4.61581e-10	6.23093e-10	-1.42268e-13	3.40675e-07	-9.61161e-11	1.60169e-10	0.001829	-4.17607e-07	-0.000282134	0.000470151
241	2022-04-01 12:22:26	3016453	6.72389e-10	-7.57515e-11	3.48837e-07	-9.52126e-11	4.35074e-10	4.35708e-10	-1.51503e-13	3.47093e-07	-9.51174e-11	1.50971e-10	0.00125531	-4.36491e-07	-0.00027404	0.000434958
242	2022-04-01 12:22:39	3029716	4.56616e-10	-9.56543e-11	3.52599e-07	-1.0092e-10	4.10234e-10	2.95887e-10	-1.91309e-13	3.50836e-07	-1.00819e-10	1.42351e-10	0.000843377	-5.45294e-07	-0.000287368	0.000405749
243	2022-04-01 12:22:52	3042980	3.16802e-10	-8.31639e-11	3.45163e-07	-8.86873e-11	4.28863e-10	2.05288e-10	-1.66328e-13	3.43437e-07	-8.85986e-11	1.48815e-10	0.000597745	-4.84303e-07	-0.000257976	0.000433312
244	2022-04-01 12:23:06	3056243	1.87028e-10	-8.56006e-11	2.56566e-07	-1.05382e-10	5.77274e-10	1.21194e-10	-1.71201e-13	2.55283e-07	-1.05277e-10	2.00314e-10	0.000474744	-6.70633e-07	-0.000412392	0.000784674
245	2022-04-01 12:23:19	3069506	7.71633e-11	-8.59384e-11	1.65639e-07	-1.04554e-10	6.77218e-10	5.00018e-11	-1.71877e-13	1.64811e-07	-1.04449e-10	2.34995e-10	0.000303389	-1.04287e-06	-0.000633754	0.00142584
246	2022-04-01 12:23:32	3082770	2.36284e-11	-7.82803e-11	1.04991e-07	-1.21141e-10	7.23057e-10	1.53112e-11	-1.56561e-13	1.04466e-07	-1.2102e-10	2.50901e-10	0.000146566	-1.49867e-06	-0.00115846	0.00240174
247	2022-04-01 12:23:46	3096033	-6.57899e-12	-7.34479e-11	6.53716e-08	-1.16777e-10	7.21757e-10	-4.26319e-12	-1.46896e-13	6.50447e-08	-1.1666e-10	2.5045e-10	-6.55424e-05	-2.25838e-06	-0.00179354	0.00385042
248	2022-04-01 12:23:59	3109806	-3.97641e-11	-7.1472e-11	4.25217e-08	-1.15938e-10	7.044e-10	-2.57671e-11	-1.42944e-13	4.23091e-08	-1.15822e-10	2.44427e-10	-0.000609021	-3.37856e-06	-0.00273752	0.00577717
249	2022-04-01 12:24:13	3123320	-6.05116e-11	-7.49017e-11	2.85798e-08	-1.18497e-10	6.78746e-10	-3.92115e-11	-1.49803e-13	2.84369e-08	-1.18379e-10	2.35525e-10	-0.0013789	-5.26792e-06	-0.00416285	0.00828237
250	2022-04-01 12:24:26	3136833	-7.11863e-11	-7.55058e-11	2.00178e-08	-1.09155e-10	6.67074e-10	-4.61287e-11	-1.51012e-13	1.99177e-08	-1.09046e-10	2.31475e-10	-0.00231597	-7.58177e-06	-0.00547482	0.0116216
251	2022-04-01 12:24:40	3150346	-7.66366e-11	-7.51782e-11	1.48937e-08	-1.1611e-10	6.35616e-10	-4.96605e-11	-1.50356e-13	1.48192e-08	-1.15994e-10	2.20559e-10	-0.00335109	-1.0146e-05	-0.00782725	0.0148833
252	2022-04-01 12:24:53	3163860	-9.17403e-11	-8.77403e-11	1.16715e-08	-1.18486e-10	5.98466e-10	-5.94477e-11	-1.75481e-13	1.16131e-08	-1.18368e-10	2.07668e-10	-0.005119	-1.51105e-05	-0.0101925	0.0178821
253	2022-04-01 12:25:07	3177373	-8.30328e-11	-8.7341e-11	9.73258e-09	-1.3159e-10	5.82357e-10	-5.38053e-11	-1.74682e-13	9.68392e-09	-1.31458e-10	2.02078e-10	-0.00555615	-1.80384e-05	-0.0135749	0.0208674
254	2022-04-01 12:25:20	3190886	-9.63091e-11	-8.43617e-11	8.54275e-09	-1.29279e-10	5.61686e-10	-6.24083e-11	-1.68723e-13	8.50004e-09	-1.2915e-10	1.94905e-10	-0.00734212	-1.98497e-05	-0.015194	0.0229299
255	2022-04-01 12:25:34	3204400	-8.50646e-11	-7.22603e-11	7.73102e-09	-1.10466e-10	5.41645e-10	-5.51219e-11	-1.44521e-13	7.69236e-09	-1.10356e-10	1.87951e-10	-0.00716579	-1.87875e-05	-0.0143461	0.0244334
256	2022-04-01 12:25:47	3217913	-8.63761e-11	-7.80858e-11	7.21443e-09	-1.11799e-10	5.14333e-10	-5.59717e-11	-1.56172e-13	7.17836e-09	-1.11687e-10	1.78474e-10	-0.00779729	-2.17559e-05	-0.0155589	0.0248627
257	2022-04-01 12:26:02	3232466	-8.69243e-11	-7.93246e-11	6.89699e-09	-1.17239e-10	4.97739e-10	-5.63269e-11	-1.58649e-13	6.86251e-09	-1.17122e-10	1.72715e-10	-0.00820793	-2.31183e-05	-0.0170669	0.025168
258	2022-04-01 12:26:16	3246510	-8.69781e-11	-7.22706e-11	6.68513e-09	-1.21894e-10	4.80355e-10	-5.63618e-11	-1.44541e-13	6.6517e-09	-1.21772e-10	1.66683e-10	-0.00847329	-2.17299e-05	-0.0183069	0.0250587
259	2022-04-01 12:26:30	3260553	-8.71608e-11	-8.3041e-11	6.55279e-09	-1.22668e-10	4.70265e-10	-5.64802e-11	-1.66082e-13	6.52003e-09	-1.22545e-10	1.63182e-10	-0.00866257	-2.54726e-05	-0.0187952	0.0250278
260	2022-04-01 12:26:44	3274596	-9.35248e-11	-8.15463e-11	6.4606e-09	-1.12638e-10	4.50754e-10	-6.06041e-11	-1.63093e-13	6.4283e-09	-1.12525e-10	1.56412e-10	-0.0094277	-2.5371e-05	-0.0175047	0.0243317
261	2022-04-01 12:26:58	3288640	-1.03694e-10	-8.68496e-11	6.40266e-09	-1.18679e-10	4.48359e-10	-6.71937e-11	-1.73699e-13	6.37065e-09	-1.1856e-10	1.55581e-10	-0.0105474	-2.72656e-05	-0.0186104	0.0244215
262	2022-04-01 12:27:12	3302683	-9.55888e-11	-7.86079e-11	6.33495e-09	-1.13939e-10	4.29953e-10	-6.19415e-11	-1.57216e-13	6.30328e-09	-1.13825e-10	1.49194e-10	-0.00982688	-2.49419e-05	-0.0180581	0.0236692
263	2022-04-01 12:27:26	3316726	-9.90825e-11	-7.91506e-11	6.2966e-09	-1.20905e-10	4.26275e-10	-6.42055e-11	-1.58301e-13	6.26512e-09	-1.20784e-10	1.47917e-10	-0.0102481	-2.52671e-05	-0.0192788	0.0236097
264	2022-04-01 12:27:40	3330770	-1.00619e-10	-7.49939e-11	6.26576e-09	-1.18894e-10	4.09482e-10	-6.52011e-11	-1.49988e-13	6.23443e-09	-1.18775e-10	1.4209e-10	-0.0104582	-2.4058e-05	-0.0190515	0.0227912
265	2022-04-01 12:27:54	3344813	-9.13641e-11	-7.88127e-11	6.21526e-09	-1.24581e-10	3.99691e-10	-5.92039e-11	-1.57625e-13	6.18418e-09	-1.24456e-10	1.38693e-10	-0.00957344	-2.54885e-05	-0.020125	0.022427
266	2022-04-01 12:28:08	3358856	-9.89428e-11	-6.55441e-11	6.1737e-09	-1.18486e-10	3.97703e-10	-6.41149e-11	-1.31088e-13	6.14283e-09	-1.18368e-10	1.38003e-10	-0.0104374	-2.134e-05	-0.0192692	0.0224657
267	2022-04-01 12:28:22	3372900	-9.26541e-11	-7.40212e-11	6.19733e-09	-1.17905e-10	3.86193e-10	-6.00399e-11	-1.48042e-13	6.16634e-09	-1.17787e-10	1.34009e-10	-0.0097367	-2.40081e-05	-0.0191016	0.0217323
268	2022-04-01 12:28:36	3386943	-8.80423e-11	-7.81882e-11	6.16553e-09	-1.19593e-10	3.85126e-10	-5.70514e-11	-1.56376e-13	6.1347e-09	-1.19473e-10	1.33639e-10	-0.00929978	-2.54905e-05	-0.019475	0.0217841
269	2022-04-01 12:28:50	3400986	-9.48686e-11	-7.47072e-11	6.13078e-09	-1.16809e-10	3.7813e-10	-6.14749e-11	-1.49414e-13	6.10013e-09	-1.16692e-10	1.31211e-10	-0.0100776	-2.44937e-05	-0.0191295	0.0215096
270	2022-04-01 12:29:05	3415030	-8.99558e-11	-7.06836e-11	6.11634e-09	-1.10079e-10	3.66489e-10	-5.82914e-11	-1.41367e-13	6.08576e-09	-1.09969e-10	1.27172e-10	-0.00957832	-2.32292e-05	-0.0180699	0.0208966
271	2022-04-01 12:29:19	3429073	-9.81151e-11	-7.37346e-11	6.10532e-09	-1.10026e-10	3.66989e-10	-6.35786e-11	-1.47469e-13	6.07479e-09	-1.09916e-10	1.27345e-10	-0.010466	-2.42756e-05	-0.0180938	0.0209629
272	2022-04-01 12:29:33	3443116	-9.87063e-11	-7.56287e-11	6.09208e-09	-1.19862e-10	3.55071e-10	-6.39617e-11	-1.51257e-13	6.06162e-09	-1.19742e-10	1.2321e-10	-0.0105519	-2.49533e-05	-0.0197541	0.0203262
273	2022-04-01 12:29:47	3457160	-9.42236e-11	-7.0786e-11	6.07698e-09	-1.18679e-10	3.49658e-10	-6.10569e-11	-1.41572e-13	6.0466e-09	-1.1856e-10	1.21331e-10	-0.0100977	-2.34135e-05	-0.0196078	0.0200661
274	2022-04-01 12:30:01	3471203	-9.57393e-11	-7.71234e-11	6.07141e-09	-1.24495e-10	3.44306e-10	-6.20391e-11	-1.54247e-13	6.04105e-09	-1.24371e-10	1.19474e-10	-0.0102696	-2.55331e-05	-0.0205876	0.019777
275	2022-04-01 12:30:15	3485246	-9.21811e-11	-6.44691e-11	6.05566e-09	-1.14584e-10	3.38049e-10	-5.97334e-11	-1.28938e-13	6.02538e-09	-1.14469e-10	1.17303e-10	-0.00991362	-2.13992e-05	-0.0189979	0.0194681
276	2022-04-01 12:30:29	3499290	-9.8803e-11	-7.62225e-11	6.04167e-09	-1.23442e-10	3.40099e-10	-6.40243e-11	-1.52445e-13	6.01146e-09	-1.23319e-10	1.18014e-10	-0.0106504	-2.53591e-05	-0.0205139	0.0196316
277	2022-04-01 12:30:43	3513333	-9.26648e-11	-6.85439e-11	6.03763e-09	-1.1381e-10	3.41434e-10	-6.00468e-11	-1.37088e-13	6.00744e-09	-1.13696e-10	1.18478e-10	-0.0099954	-2.28197e-05	-0.0189259	0.0197218
278	2022-04-01 12:30:57	3527376	-1.05048e-10	-7.8915e-11	6.03783e-09	-1.1983e-10	3.39069e-10	-6.80711e-11	-1.5783e-13	6.00764e-09	-1.1971e-10	1.17657e-10	-0.0113308	-2.62715e-05	-0.0199263	0.0195846
279	2022-04-01 12:31:11	3541420	-9.63413e-11	-7.76455e-11	6.01912e-09	-1.18163e-10	3.26154e-10	-6.24292e-11	-1.55291e-13	5.98902e-09	-1.18045e-10	1.13175e-10	-0.0104239	-2.59293e-05	-0.0197102	0.0188971
280	2022-04-01 12:31:25	3555463	-9.95233e-11	-7.27006e-11	6.01206e-09	-1.19507e-10	3.26738e-10	-6.44911e-11	-1.45401e-13	5.982e-09	-1.19387e-10	1.13378e-10	-0.0107809	-2.43065e-05	-0.0199578	0.0189532
281	2022-04-01 12:31:39	3569506	-1.00684e-10	-6.83596e-11	6.01614e-09	-1.12767e-10	3.26316e-10	-6.52432e-11	-1.36719e-13	5.98606e-09	-1.12654e-10	1.13232e-10	-0.0108992	-2.28396e-05	-0.0188194	0.0189159
282	2022-04-01 12:31:53	3583550	-1.06478e-10	-7.9253e-11	6.01333e-09	-1.22324e-10	3.26807e-10	-6.89977e-11	-1.58506e-13	5.98326e-09	-1.22202e-10	1.13402e-10	-0.0115318	-2.64916e-05	-0.0204239	0.0189532
283	2022-04-01 12:32:07	3597593	-1.01307e-10	-7.81165e-11	5.99733e-09	-1.22711e-10	3.15896e-10	-6.56469e-11	-1.56233e-13	5.96734e-09	-1.22588e-10	1.09616e-10	-0.011001	-2.61813e-05	-0.0205432	0.0183693
284	2022-04-01 12:32:21	3611636	-9.31593e-11	-7.88844e-11	5.99835e-09	-1.16433e-10	3.18729e-10	-6.03672e-11	-1.57769e-13	5.96836e-09	-1.16317e-10	1.10599e-10	-0.0101145	-2.64342e-05	-0.0194889	0.0185309
285	2022-04-01 12:32:35	3625680	-1.00877e-10	-7.00591e-11	5.99927e-09	-1.06736e-10	3.15511e-10	-6.53683e-11	-1.40118e-13	5.96927e-09	-1.06629e-10	1.09482e-10	-0.0109508	-2.34732e-05	-0.017863	0.018341
286	2022-04-01 12:32:49	3639723	-9.46858e-11	-7.84953e-11	5.98713e-09	-1.28913e-10	3.05284e-10	-6.13564e-11	-1.56991e-13	5.95719e-09	-1.28784e-10	1.05934e-10	-0.0102995	-2.63531e-05	-0.0216182	0.0177825
287	2022-04-01 12:33:03	3653766	-1.10305e-10	-7.58846e-11	6.00103e-09	-1.1854e-10	3.04984e-10	-7.14776e-11	-1.51769e-13	5.97102e-09	-1.18421e-10	1.05829e-10	-0.0119707	-2.54176e-05	-0.0198327	0.0177238
288	2022-04-01 12:33:17	3667810	-9.82118e-11	-7.8311e-11	5.95738e-09	-1.18153e-10	3.03464e-10	-6.36412e-11	-1.56622e-13	5.92759e-09	-1.18035e-10	1.05302e-10	-0.0107364	-2.64225e-05	-0.0199128	0.0177647
289	2022-04-01 12:33:31	3681853	-1.03178e-10	-6.08858e-11	5.97544e-09	-1.16164e-10	3.0599e-10	-6.68593e-11	-1.21772e-13	5.94556e-09	-1.16048e-10	1.06179e-10	-0.0112453	-2.04811e-05	-0.0195184	0.0178584
290	2022-04-01 12:33:45	3695896	-8.83971e-11	-6.34044e-11	5.98289e-09	-1.11187e-10	3.08501e-10	-5.72813e-11	-1.26809e-13	5.95298e-09	-1.11076e-10	1.0705e-10	-0.0096223	-2.13018e-05	-0.0186589	0.0179826
291	2022-04-01 12:33:59	3709940	-9.57178e-11	-6.24727e-11	5.96053e-09	-1.21077e-10	2.98028e-10	-6.20251e-11	-1.24945e-13	5.93073e-09	-1.20956e-10	1.03416e-10	-0.0104583	-2.10675e-05	-0.0203948	0.0174373
292	2022-04-01 12:34:13	3723983	-9.8674e-11	-6.8636e-11	5.9525e-09	-1.19808e-10	2.96008e-10	-6.39408e-11	-1.37272e-13	5.92274e-09	-1.19688e-10	1.02715e-10	-0.0107958	-2.31771e-05	-0.0202083	0.0173424
293	2022-04-01 12:34:28	3738026	-9.46643e-11	-7.20965e-11	5.96998e-09	-1.24517e-10	2.96346e-10	-6.13425e-11	-1.44193e-13	5.94013e-09	-1.24392e-10	1.02832e-10	-0.0103268	-2.42744e-05	-0.020941	0.0173114
294	2022-04-01 12:34:42	3752070	-1.07188e-10	-7.1175e-11	5.95857e-09	-1.25602e-10	2.94288e-10	-6.94578e-11	-1.4235e-13	5.92878e-09	-1.25476e-10	1.02118e-10	-0.0117154	-2.401e-05	-0.021164	0.0172241
295	2022-04-01 12:34:56	3766113	-1.02673e-10	-7.32739e-11	5.94598e-09	-1.25183e-10	2.87408e-10	-6.65321e-11	-1.46548e-13	5.91625e-09	-1.25058e-10	9.97306e-11	-0.0112457	-2.47704e-05	-0.021138	0.0168571
296	2022-04-01 12:35:10	3780156	-1.02124e-10	-7.26903e-11	5.9379e-09	-1.18765e-10	2.85565e-10	-6.61764e-11	-1.45381e-13	5.90821e-09	-1.18646e-10	9.90911e-11	-0.0112007	-2.46065e-05	-0.0200816	0.0167718
297	2022-04-01 12:35:24	3794200	-1.01458e-10	-8.17612e-11	5.96263e-09	-1.1339e-10	2.8621e-10	-6.57448e-11	-1.63522e-13	5.93282e-09	-1.13277e-10	9.93149e-11	-0.0110815	-2.75624e-05	-0.0190932	0.0167399
298	2022-04-01 12:35:38	3808243	-9.81365e-11	-7.88741e-11	5.96318e-09	-1.20765e-10	2.91854e-10	-6.35925e-11	-1.57748e-13	5.93336e-09	-1.20644e-10	1.01273e-10	-0.0107178	-2.65866e-05	-0.0203332	0.0170685
299	2022-04-01 12:35:52	3822286	-9.32883e-11	-8.07784e-11	6.31919e-09	-1.17518e-10	2.82824e-10	-6.04508e-11	-1.61557e-13	6.28759e-09	-1.174e-10	9.81399e-11	-0.0096143	-2.56945e-05	-0.0186718	0.0156085
300	2022-04-01 12:36:06	3836330	-9.33528e-11	-8.49863e-11	5.30268e-09	-1.2428e-10	2.88376e-10	-6.04926e-11	-1.69973e-13	5.27617e-09	-1.24156e-10	1.00066e-10	-0.0114653	-3.22152e-05	-0.0235314	0.0189658
301	2022-04-01 12:36:20	3850373	-9.88245e-11	-7.70312e-11	5.19033e-09	-1.21249e-10	2.88798e-10	-6.40383e-11	-1.54062e-13	5.16438e-09	-1.21128e-10	1.00213e-10	-0.0124	-2.98317e-05	-0.0234545	0.0194046
302	2022-04-01 12:36:34	3864416	-8.58601e-11	-7.19634e-11	5.25395e-09	-1.25785e-10	2.80359e-10	-5.56373e-11	-1.43927e-13	5.22768e-09	-1.25659e-10	9.72846e-11	-0.0106428	-2.75317e-05	-0.0240373	0.0186095
303	2022-04-01 12:36:48	3878460	-1.10628e-10	-8.1403e-11	5.46988e-09	-1.12778e-10	2.79944e-10	-7.16869e-11	-1.62806e-13	5.44253e-09	-1.12665e-10	9.71406e-11	-0.0131716	-2.99137e-05	-0.0207009	0.0178484
304	2022-04-01 12:37:02	3892503	-9.98028e-11	-8.12698e-11	5.58987e-09	-1.16572e-10	2.85181e-10	-6.46722e-11	-1.6254e-13	5.56192e-09	-1.16455e-10	9.89578e-11	-0.0116277	-2.92236e-05	-0.020938	0.017792
305	2022-04-01 12:37:16	3906546	-9.38043e-11	-9.66371e-11	5.64868e-09	-1.20765e-10	2.77794e-10	-6.07852e-11	-1.93274e-13	5.62044e-09	-1.20644e-10	9.63945e-11	-0.010815	-3.43878e-05	-0.0214653	0.0171507
306	2022-04-01 12:37:30	3920590	-1.10875e-10	-8.34096e-11	1.50191e-08	-1.16648e-10	3.12609e-10	-7.1847e-11	-1.66819e-13	1.4944e-08	-1.16531e-10	1.08475e-10	-0.00480775	-1.1163e-05	-0.00779787	0.00725879
307	2022-04-01 12:37:45	3935143	-1.00996e-10	-7.73077e-11	1.03199e-07	-1.21743e-10	2.99916e-10	-6.54454e-11	-1.54615e-13	1.02683e-07	-1.21621e-10	1.04071e-10	-0.000637354	-1.50575e-06	-0.00118443	0.00101352
308	2022-04-01 12:37:58	3948917	-1.02382e-10	-7.97341e-11	2.25302e-07	-1.11154e-10	2.64664e-10	-6.63435e-11	-1.59468e-13	2.24175e-07	-1.11043e-10	9.18384e-11	-0.000295945	-7.11354e-07	-0.000495339	0.000409672
309	2022-04-01 12:38:12	3962180	-1.01125e-10	-8.65117e-11	2.97147e-07	-1.22915e-10	2.41029e-10	-6.5529e-11	-1.73023e-13	2.95661e-07	-1.22792e-10	8.36371e-11	-0.000221635	-5.85208e-07	-0.000415313	0.000282881
310	2022-04-01 12:38:25	3975444	-1.01608e-10	-8.46996e-11	3.29038e-07	-1.12713e-10	2.30771e-10	-6.5842e-11	-1.69399e-13	3.27393e-07	-1.126e-10	8.00775e-11	-0.00020111	-5.17419e-07	-0.00034393	0.000244592
311	2022-04-01 12:38:38	3988707	-1.1611e-10	-9.66057e-11	3.53763e-07	-1.04758e-10	2.1824e-10	-7.52393e-11	-1.93211e-13	3.51994e-07	-1.04653e-10	7.57293e-11	-0.000213751	-5.48905e-07	-0.000297315	0.000215144
312	2022-04-01 12:38:51	4001970	-1.19647e-10	-8.70953e-11	3.75891e-07	-1.13853e-10	2.07866e-10	-7.75313e-11	-1.74191e-13	3.74012e-07	-1.13739e-10	7.21295e-11	-0.000207296	-4.65736e-07	-0.000304106	0.000192854
313	2022-04-01 12:39:05	4015233	-1.10617e-10	-9.28593e-11	3.96047e-07	-1.13896e-10	1.91956e-10	-7.16798e-11	-1.85719e-13	3.94067e-07	-1.13782e-10	6.66087e-11	-0.000181898	-4.71287e-07	-0.000288738	0.000169029
314	2022-04-01 12:39:18	4028496	-1.04694e-10	-9.41186e-11	4.03841e-07	-1.17357e-10	1.84078e-10	-6.78417e-11	-1.88237e-13	4.01822e-07	-1.1724e-10	6.38751e-11	-0.000168835	-4.68459e-07	-0.00029177	0.000158964
315	2022-04-01 12:39:31	4041760	-8.30758e-11	-9.99848e-11	4.06438e-07	-1.00877e-10	7.90929e-10	-5.38331e-11	-1.9997e-13	4.04406e-07	-1.00776e-10	2.74452e-10	-0.000133117	-4.94478e-07	-0.000249196	0.000678656
316	2022-04-01 12:39:45	4055023	2.27226e-09	-7.91915e-11	3.88522e-07	-4.43221e-11	2.57526e-09	1.47242e-09	-1.58383e-13	3.86579e-07	-4.42778e-11	8.93615e-10	0.00380885	-4.09704e-07	-0.000114537	0.0023116
317	2022-04-01 12:40:01	4071537	5.79131e-09	-8.12493e-11	3.57257e-07	-4.29999e-14	3.49426e-09	3.75277e-09	-1.62499e-13	3.55471e-07	-4.29569e-14	1.21251e-09	0.0105572	-4.57136e-07	-1.20845e-07	0.00341099
318	2022-04-01 12:40:12	4082590	7.80421e-09	-8.02563e-11	3.63887e-07	3.75066e-11	3.62623e-09	5.05713e-09	-1.60513e-13	3.62068e-07	3.74691e-11	1.2583e-09	0.0139674	-4.43322e-07	0.000103486	0.00347532
319	2022-04-01 12:40:24	4094684	9.44846e-09	-7.39496e-11	3.67559e-07	4.04951e-11	3.3934e-09	6.1226e-09	-1.47899e-13	3.65721e-07	4.04546e-11	1.17751e-09	0.0167412	-4.04404e-07	0.000110616	0.00321969
320	2022-04-01 12:40:34	4104568	1.04361e-08	-8.18739e-11	3.70695e-07	3.92589e-11	3.05949e-09	6.76259e-09	-1.63748e-13	3.68842e-07	3.92196e-11	1.06164e-09	0.0183347	-4.43952e-07	0.000106332	0.00287832
321	2022-04-01 12:40:42	4112880	1.12195e-08	-8.76379e-11	3.71949e-07	2.94119e-11	2.73876e-09	7.27024e-09	-1.75276e-13	3.70089e-07	2.93825e-11	9.5035e-10	0.0196445	-4.73604e-07	7.9393e-05	0.00256789
322	2022-04-01 12:40:51	4121193	1.16153e-08	-8.17715e-11	3.70337e-07	3.04117e-11	2.43336e-09	7.52671e-09	-1.63543e-13	3.68485e-07	3.03813e-11	8.44376e-10	0.0204261	-4.43825e-07	8.24491e-05	0.00229148
323	2022-04-01 12:40:59	4129506	1.20762e-08	-7.14412e-11	3.70605e-07	2.85734e-11	2.16232e-09	7.82538e-09	-1.42882e-13	3.68752e-07	2.85448e-11	7.50325e-10	0.0212212	-3.87476e-07	7.74093e-05	0.00203477
324	2022-04-01 12:41:07	4137820	1.22851e-08	-8.14439e-11	3.70426e-07	2.73802e-11	1.91896e-09	7.96074e-09	-1.62888e-13	3.68574e-07	2.73528e-11	6.65879e-10	0.0215988	-4.41941e-07	7.42126e-05	0.00180664
325	2022-04-01 12:41:16	4146133	1.2568e-08	-8.14439e-11	3.70695e-07	1.85329e-11	1.71676e-09	8.14406e-09	-1.62888e-13	3.68842e-07	1.85144e-11	5.95716e-10	0.0220801	-4.4162e-07	5.0196e-05	0.0016151
326	2022-04-01 12:41:24	4154446	1.27722e-08	-7.27312e-11	3.6962e-07	2.15537e-11	1.56962e-09	8.27639e-09	-1.45462e-13	3.67772e-07	2.15321e-11	5.44658e-10	0.0225041	-3.95523e-07	5.85476e-05	0.00148097
327	2022-04-01 12:41:32	4162759	1.29046e-08	-7.7236e-11	3.70068e-07	1.82857e-11	1.39616e-09	8.36218e-09	-1.54472e-13	3.68218e-07	1.82674e-11	4.84468e-10	0.0227099	-4.19513e-07	4.96104e-05	0.00131571
328	2022-04-01 12:41:41	4171072	1.30262e-08	-7.1216e-11	3.71053e-07	2.01347e-11	1.27974e-09	8.44098e-09	-1.42432e-13	3.69198e-07	2.01146e-11	4.4407e-10	0.022863	-3.85788e-07	5.44818e-05	0.0012028
329	2022-04-01 12:41:49	4179385	1.25707e-08	-7.07553e-11	3.62812e-07	8.43873e-12	1.18364e-09	8.14581e-09	-1.41511e-13	3.60998e-07	8.43029e-12	4.10723e-10	0.0225647	-3.91998e-07	2.33527e-05	0.00113774
330	2022-04-01 12:41:57	4187698	1.14084e-08	-7.38882e-11	3.70337e-07	-1.69312e-11	9.4035e-10	7.39264e-09	-1.47776e-13	3.68485e-07	-1.69143e-11	3.26301e-10	0.0200622	-4.01037e-07	-4.59022e-05	0.000885521
331	2022-04-01 12:42:06	4196522	7.0483e-09	-8.51296e-11	3.19633e-07	-5.03636e-11	7.9025e-10	4.5673e-09	-1.70259e-13	3.18035e-07	-5.03132e-11	2.74217e-10	0.014361	-5.35348e-07	-0.0001582	0.000862222
332	2022-04-01 12:42:15	4205365	5.21341e-09	-9.2757e-11	3.1157e-07	-5.75124e-11	6.89672e-10	3.37829e-09	-1.85514e-13	3.10012e-07	-5.74549e-11	2.39316e-10	0.0108973	-5.98409e-07	-0.000185331	0.000771957
333	2022-04-01 12:42:24	4214208	3.97386e-09	-8.92658e-11	3.09241e-07	-8.22696e-11	6.28398e-10	2.57506e-09	-1.78532e-13	3.07695e-07	-8.21873e-11	2.18054e-10	0.00836888	-5.80223e-07	-0.000267107	0.00070867
334	2022-04-01 12:42:36	4226302	2.77406e-09	-9.18765e-11	3.10047e-07	-8.21621e-11	5.64681e-10	1.79759e-09	-1.83753e-13	3.08497e-07	-8.20799e-11	1.95944e-10	0.00582694	-5.9564e-07	-0.000266064	0.000635158
335	2022-04-01 12:42:47	4237355	2.04298e-09	-8.01334e-11	3.18916e-07	-9.26971e-11	5.23378e-10	1.32385e-09	-1.60267e-13	3.17321e-07	-9.26044e-11	1.81612e-10	0.00417196	-5.05061e-07	-0.000291832	0.000572329
336	2022-04-01 12:42:58	4248409	1.50438e-09	-9.34224e-11	3.30113e-07	-1.00824e-10	4.87811e-10	9.74838e-10	-1.86845e-13	3.28462e-07	-1.00723e-10	1.6927e-10	0.00296788	-5.68847e-07	-0.000306651	0.000515342
337	2022-04-01 12:43:09	4259462	1.12051e-09	-9.08936e-11	3.38266e-07	-9.50083e-11	4.47337e-10	7.2609e-10	-1.81787e-13	3.36575e-07	-9.49133e-11	1.55226e-10	0.00215729	-5.4011e-07	-0.000281998	0.000461193
338	2022-04-01 12:43:21	4271556	7.68709e-10	-8.68803e-11	3.47851e-07	-1.06166e-10	4.10181e-10	4.98123e-10	-1.73761e-13	3.46112e-07	-1.0606e-10	1.42333e-10	0.0014392	-5.02036e-07	-0.000306432	0.000411234
339	2022-04-01 12:43:34	4284819	5.29028e-10	-8.7556e-11	3.52599e-07	-1.0823e-10	3.9705e-10	3.4281e-10	-1.75112e-13	3.50836e-07	-1.08122e-10	1.37776e-10	0.000977124	-4.99128e-07	-0.000308183	0.000392709
340	2022-04-01 12:43:48	4298082	3.67058e-10	-9.79067e-11	3.53226e-07	-1.02372e-10	3.75159e-10	2.37854e-10	-1.95813e-13	3.5146e-07	-1.0227e-10	1.3018e-10	0.000676759	-5.57143e-07	-0.000290985	0.000370398
341	2022-04-01 12:44:01	4311345	2.29049e-10	-9.66162e-11	2.94908e-07	-1.17551e-10	4.93792e-10	1.48424e-10	-1.93232e-13	2.93433e-07	-1.17433e-10	1.71346e-10	0.000505817	-6.58522e-07	-0.000400205	0.000583934
342	2022-04-01 12:44:14	4324608	1.13939e-10	-8.82215e-11	1.94843e-07	-1.16551e-10	6.20957e-10	7.38325e-11	-1.76443e-13	1.93869e-07	-1.16434e-10	2.15472e-10	0.000380837	-9.10116e-07	-0.000600584	0.00111143
343	2022-04-01 12:44:27	4337872	3.70121e-11	-9.30436e-11	1.24073e-07	-1.12412e-10	6.90164e-10	2.39838e-11	-1.86087e-13	1.23453e-07	-1.123e-10	2.39487e-10	0.000194276	-1.50736e-06	-0.000909657	0.00193991
344	2022-04-01 12:44:41	4351135	-3.23574e-12	-8.35222e-11	7.91019e-08	-1.20421e-10	7.07633e-10	-2.09676e-12	-1.67044e-13	7.87064e-08	-1.20301e-10	2.45549e-10	-2.66403e-05	-2.12237e-06	-0.00152847	0.00311981
345	2022-04-01 12:44:54	4364398	-4.26236e-11	-9.03408e-11	4.98687e-08	-1.16906e-10	6.93404e-10	-2.76201e-11	-1.80682e-13	4.96194e-08	-1.16789e-10	2.40611e-10	-0.000556639	-3.64135e-06	-0.0023537	0.00484914
346	2022-04-01 12:45:08	4378172	-5.75231e-11	-7.72974e-11	3.29223e-08	-1.19593e-10	6.72634e-10	-3.7275e-11	-1.54595e-13	3.27577e-08	-1.19473e-10	2.33404e-10	-0.0011379	-4.71934e-06	-0.00364719	0.00712517
347	2022-04-01 12:45:21	4391685	-6.71873e-11	-7.98263e-11	2.27938e-08	-1.28118e-10	6.47916e-10	-4.35374e-11	-1.59653e-13	2.26798e-08	-1.2799e-10	2.24827e-10	-0.00191965	-7.03941e-06	-0.00564333	0.00991307
348	2022-04-01 12:45:35	4405198	-6.79721e-11	-8.07887e-11	1.65129e-08	-1.24732e-10	6.24497e-10	-4.40459e-11	-1.61577e-13	1.64303e-08	-1.24607e-10	2.167e-10	-0.00268077	-9.83409e-06	-0.00758398	0.013189
349	2022-04-01 12:45:48	4418711	-8.09581e-11	-8.32868e-11	1.2784e-08	-1.22463e-10	5.97952e-10	-5.24608e-11	-1.66574e-13	1.27201e-08	-1.22341e-10	2.07489e-10	-0.00412425	-1.30953e-05	-0.00961791	0.016312
350	2022-04-01 12:46:02	4432225	-8.11193e-11	-8.96855e-11	1.04128e-08	-1.24506e-10	5.70018e-10	-5.25653e-11	-1.79371e-13	1.03607e-08	-1.24381e-10	1.97796e-10	-0.00507351	-1.73126e-05	-0.0120051	0.0190909
351	2022-04-01 12:46:15	4445738	-8.08721e-11	-8.71874e-11	8.96383e-09	-1.23764e-10	5.48924e-10	-5.24051e-11	-1.74375e-13	8.91901e-09	-1.2364e-10	1.90477e-10	-0.00587567	-1.95509e-05	-0.0138626	0.0213563
352	2022-04-01 12:46:29	4459251	-8.12268e-11	-8.57234e-11	8.03391e-09	-1.26237e-10	5.28906e-10	-5.2635e-11	-1.71447e-13	7.99374e-09	-1.26111e-10	1.8353e-10	-0.00658452	-2.14476e-05	-0.0157762	0.0229593
353	2022-04-01 12:46:42	4472765	-8.48388e-11	-7.6847e-11	7.38372e-09	-1.20399e-10	5.07967e-10	-5.49755e-11	-1.53694e-13	7.3468e-09	-1.20279e-10	1.76265e-10	-0.00748292	-2.09199e-05	-0.0163716	0.023992
354	2022-04-01 12:46:57	4487318	-9.26648e-11	-8.78631e-11	7.01596e-09	-1.19249e-10	4.86482e-10	-6.00468e-11	-1.75726e-13	6.98088e-09	-1.1913e-10	1.68809e-10	-0.00860161	-2.51725e-05	-0.0170651	0.0241817
355	2022-04-01 12:47:11	4501362	-8.79133e-11	-7.82906e-11	6.76739e-09	-1.22184e-10	4.74757e-10	-5.69678e-11	-1.56581e-13	6.73355e-09	-1.22062e-10	1.64741e-10	-0.00846029	-2.32539e-05	-0.0181274	0.0244656
356	2022-04-01 12:47:25	4515405	-8.40541e-11	-7.49939e-11	6.63119e-09	-1.25484e-10	4.59561e-10	-5.44671e-11	-1.49988e-13	6.59803e-09	-1.25359e-10	1.59468e-10	-0.00825504	-2.27322e-05	-0.0189994	0.024169
357	2022-04-01 12:47:39	4529448	-8.66448e-11	-8.22527e-11	6.50324e-09	-1.17529e-10	4.50777e-10	-5.61458e-11	-1.64505e-13	6.47072e-09	-1.17411e-10	1.5642e-10	-0.0086769	-2.5423e-05	-0.018145	0.0241734
358	2022-04-01 12:47:53	4543492	-8.51828e-11	-8.42389e-11	6.43151e-09	-1.12186e-10	4.38514e-10	-5.51985e-11	-1.68478e-13	6.39935e-09	-1.12074e-10	1.52164e-10	-0.00862563	-2.63273e-05	-0.0175133	0.0237781
359	2022-04-01 12:48:07	4557535	-1.03017e-10	-8.3082e-11	6.35862e-09	-1.21711e-10	4.23265e-10	-6.6755e-11	-1.66164e-13	6.32683e-09	-1.21589e-10	1.46873e-10	-0.0105511	-2.62634e-05	-0.0192181	0.0232143
360	2022-04-01 12:48:21	4571578	-9.93083e-11	-8.49658e-11	6.29977e-09	-1.21109e-10	4.11179e-10	-6.43518e-11	-1.69932e-13	6.26827e-09	-1.20988e-10	1.42679e-10	-0.0102663	-2.71098e-05	-0.0193016	0.0227621
361	2022-04-01 12:48:35	4585622	-9.18801e-11	-8.05941e-11	6.27581e-09	-1.20657e-10	4.00275e-10	-5.95383e-11	-1.61188e-13	6.24443e-09	-1.20536e-10	1.38895e-10	-0.00953462	-2.58131e-05	-0.019303	0.0222431
362	2022-04-01 12:48:49	4599665	-9.46213e-11	-8.66346e-11	6.24689e-09	-1.23678e-10	3.88704e-10	-6.13146e-11	-1.73269e-13	6.21566e-09	-1.23554e-10	1.3488e-10	-0.00986454	-2.78763e-05	-0.0198779	0.0217001
363	2022-04-01 12:49:03	4613708	-9.37398e-11	-7.95703e-11	6.21799e-09	-1.21517e-10	3.85264e-10	-6.07434e-11	-1.59141e-13	6.1869e-09	-1.21395e-10	1.33687e-10	-0.00981807	-2.57222e-05	-0.0196214	0.021608
364	2022-04-01 12:49:17	4627752	-1.09499e-10	-8.84365e-11	6.18891e-09	-1.26258e-10	3.71726e-10	-7.09554e-11	-1.76873e-13	6.15797e-09	-1.26132e-10	1.28989e-10	-0.0115225	-2.87226e-05	-0.0204827	0.0209467
365	2022-04-01 12:49:31	4641795	-9.74163e-11	-8.66039e-11	6.159e-09	-1.19733e-10	3.63964e-10	-6.31258e-11	-1.73208e-13	6.1282e-09	-1.19613e-10	1.26296e-10	-0.0103009	-2.8264e-05	-0.0195185	0.0206089
366	2022-04-01 12:49:45	4655838	-8.96441e-11	-8.04815e-11	6.15559e-09	-1.21593e-10	3.59179e-10	-5.80894e-11	-1.60963e-13	6.12481e-09	-1.21471e-10	1.24635e-10	-0.00948427	-2.62805e-05	-0.0198327	0.0203492
367	2022-04-01 12:49:59	4669882	-9.21273e-11	-8.91634e-11	6.14086e-09	-1.22678e-10	3.54749e-10	-5.96985e-11	-1.78327e-13	6.11016e-09	-1.22555e-10	1.23098e-10	-0.00977037	-2.91853e-05	-0.0200576	0.0201464
368	2022-04-01 12:50:13	4683925	-1.04317e-10	-8.16282e-11	6.15052e-09	-1.24549e-10	3.50741e-10	-6.75974e-11	-1.63256e-13	6.11977e-09	-1.24424e-10	1.21707e-10	-0.0110457	-2.66769e-05	-0.0203316	0.0198875
369	2022-04-01 12:50:27	4697968	-9.8717e-11	-7.79527e-11	6.11792e-09	-1.16755e-10	3.50419e-10	-6.39686e-11	-1.55905e-13	6.08733e-09	-1.16638e-10	1.21595e-10	-0.0105085	-2.56115e-05	-0.0191608	0.0199752
370	2022-04-01 12:50:42	4712012	-1.04328e-10	-8.16998e-11	6.11167e-09	-1.12767e-10	3.46134e-10	-6.76045e-11	-1.634e-13	6.08111e-09	-1.12654e-10	1.20108e-10	-0.0111171	-2.687e-05	-0.0185253	0.0197511
371	2022-04-01 12:50:56	4726055	-9.69433e-11	-8.0891e-11	6.08906e-09	-1.25215e-10	3.40682e-10	-6.28193e-11	-1.61782e-13	6.05861e-09	-1.2509e-10	1.18217e-10	-0.0103686	-2.67028e-05	-0.0206466	0.0195122
372	2022-04-01 12:51:10	4740098	-9.9706e-11	-8.21708e-11	6.08638e-09	-1.26376e-10	3.34731e-10	-6.46095e-11	-1.64342e-13	6.05595e-09	-1.2625e-10	1.16152e-10	-0.0106688	-2.71372e-05	-0.0208472	0.0191798
373	2022-04-01 12:51:24	4754142	-1.01017e-10	-8.76174e-11	6.06554e-09	-1.20829e-10	3.35092e-10	-6.5459e-11	-1.75235e-13	6.03521e-09	-1.20708e-10	1.16277e-10	-0.0108462	-2.90354e-05	-0.0200007	0.0192664
374	2022-04-01 12:51:38	4768185	-1.04285e-10	-8.11982e-11	6.06809e-09	-1.28333e-10	3.23114e-10	-6.75767e-11	-1.62396e-13	6.03775e-09	-1.28205e-10	1.12121e-10	-0.0111924	-2.68968e-05	-0.0212338	0.0185699
375	2022-04-01 12:51:52	4782228	-1.02759e-10	-7.72974e-11	6.056e-09	-1.28763e-10	3.19166e-10	-6.65878e-11	-1.54595e-13	6.02572e-09	-1.28634e-10	1.10751e-10	-0.0110506	-2.56558e-05	-0.0213475	0.0183796
376	2022-04-01 12:52:06	4796272	-1.0206e-10	-7.13901e-11	6.04725e-09	-1.24377e-10	3.26722e-10	-6.61349e-11	-1.4278e-13	6.01701e-09	-1.24253e-10	1.13373e-10	-0.0109913	-2.37294e-05	-0.0206502	0.018842
377	2022-04-01 12:52:20	4810315	-9.90395e-11	-7.65091e-11	6.01548e-09	-1.12401e-10	3.20687e-10	-6.41776e-11	-1.53018e-13	5.9854e-09	-1.12289e-10	1.11278e-10	-0.0107224	-2.55652e-05	-0.0187604	0.0185916
378	2022-04-01 12:52:34	4824359	-1.12283e-10	-8.73512e-11	6.04665e-09	-1.3087e-10	3.21271e-10	-7.27594e-11	-1.74702e-13	6.01642e-09	-1.30739e-10	1.11481e-10	-0.0120935	-2.90376e-05	-0.0217304	0.0185295
379	2022-04-01 12:52:48	4838402	-9.35248e-11	-7.76046e-11	6.00755e-09	-1.24775e-10	3.14491e-10	-6.06041e-11	-1.55209e-13	5.97751e-09	-1.2465e-10	1.09128e-10	-0.0101387	-2.59655e-05	-0.0208532	0.0182565
380	2022-04-01 12:53:02	4852445	-9.19338e-11	-8.31331e-11	6.01183e-09	-1.2786e-10	3.11389e-10	-5.95731e-11	-1.66266e-13	5.98177e-09	-1.27732e-10	1.08052e-10	-0.00995911	-2.77955e-05	-0.0213536	0.0180635
381	2022-04-01 12:53:16	4866489	-1.03662e-10	-7.97546e-11	6.01696e-09	-1.17217e-10	3.03948e-10	-6.7173e-11	-1.59509e-13	5.98688e-09	-1.171e-10	1.0547e-10	-0.01122	-2.66431e-05	-0.0195594	0.0176169
382	2022-04-01 12:53:30	4880532	-1.03705e-10	-8.21912e-11	5.98667e-09	-1.21765e-10	2.98949e-10	-6.72008e-11	-1.64382e-13	5.95674e-09	-1.21643e-10	1.03735e-10	-0.0112815	-2.7596e-05	-0.0204211	0.0174148
383	2022-04-01 12:53:44	4894575	-1.03543e-10	-8.42798e-11	5.99402e-09	-1.33342e-10	2.99394e-10	-6.70959e-11	-1.6856e-13	5.96405e-09	-1.33209e-10	1.0389e-10	-0.0112501	-2.82626e-05	-0.0223353	0.0174193
384	2022-04-01 12:53:58	4908618	-1.05908e-10	-9.94219e-11	5.98773e-09	-1.194e-10	2.94089e-10	-6.86284e-11	-1.98844e-13	5.95779e-09	-1.19281e-10	1.02049e-10	-0.0115191	-3.33754e-05	-0.0200209	0.0171286
385	2022-04-01 12:54:12	4922662	-1.06156e-10	-8.89484e-11	5.96282e-09	-1.37535e-10	2.87032e-10	-6.87891e-11	-1.77897e-13	5.93301e-09	-1.37397e-10	9.96001e-11	-0.0115943	-2.99843e-05	-0.0231582	0.0167875
386	2022-04-01 12:54:26	4936705	-1.06166e-10	-9.68105e-11	5.98296e-09	-1.3101e-10	2.88222e-10	-6.87956e-11	-1.93621e-13	5.95305e-09	-1.30879e-10	1.00013e-10	-0.0115564	-3.25247e-05	-0.0219852	0.0168003
387	2022-04-01 12:54:40	4950748	-1.07596e-10	-8.60612e-11	5.97744e-09	-1.26129e-10	2.90257e-10	-6.97222e-11	-1.72122e-13	5.94755e-09	-1.26003e-10	1.00719e-10	-0.0117228	-2.894e-05	-0.0211857	0.0169346
388	2022-04-01 12:54:54	4964792	-1.05822e-10	-9.33814e-11	5.96413e-09	-1.27914e-10	2.91439e-10	-6.85727e-11	-1.86763e-13	5.93431e-09	-1.27786e-10	1.01129e-10	-0.0115553	-3.14717e-05	-0.0215334	0.0170415
389	2022-04-01 12:55:08	4978835	-9.80828e-11	-8.58258e-11	5.97097e-09	-1.24828e-10	2.84137e-10	-6.35577e-11	-1.71652e-13	5.94112e-09	-1.24703e-10	9.85955e-11	-0.0106979	-2.88922e-05	-0.0209899	0.0165955
390	2022-04-01 12:55:22	4992878	-1.07779e-10	-8.3297e-11	5.94518e-09	-1.20711e-10	2.82616e-10	-6.98408e-11	-1.66594e-13	5.91545e-09	-1.2059e-10	9.80678e-11	-0.0118065	-2.81625e-05	-0.0203856	0.0165782
391	2022-04-01 12:55:36	5006922	-9.80398e-11	-7.9857e-11	5.95602e-09	-1.26118e-10	2.89074e-10	-6.35298e-11	-1.59714e-13	5.92624e-09	-1.25992e-10	1.00309e-10	-0.0107201	-2.69503e-05	-0.02126	0.0169262
392	2022-04-01 12:55:50	5020965	-9.75131e-11	-7.8393e-11	5.97734e-09	-1.26301e-10	2.87561e-10	-6.31885e-11	-1.56786e-13	5.94745e-09	-1.26175e-10	9.97837e-11	-0.0106245	-2.63619e-05	-0.0212149	0.0167775
393	2022-04-01 12:56:05	5035008	-1.0177e-10	-7.51065e-11	5.9498e-09	-1.15723e-10	2.91301e-10	-6.5947e-11	-1.50213e-13	5.92005e-09	-1.15607e-10	1.01081e-10	-0.0111396	-2.53736e-05	-0.0195281	0.0170744
394	2022-04-01 12:56:19	5049052	-1.07897e-10	-7.89868e-11	5.96256e-09	-1.25409e-10	2.79422e-10	-6.99173e-11	-1.57974e-13	5.93275e-09	-1.25284e-10	9.69594e-11	-0.011785	-2.66274e-05	-0.0211173	0.0163431
395	2022-04-01 12:56:33	5063095	-1.04296e-10	-7.83008e-11	5.95258e-09	-1.19195e-10	2.81895e-10	-6.75838e-11	-1.56602e-13	5.92282e-09	-1.19076e-10	9.78176e-11	-0.0114108	-2.64404e-05	-0.0201046	0.0165154
396	2022-04-01 12:56:47	5077139	-1.02554e-10	-9.3617e-11	7.12363e-09	-1.37191e-10	2.69394e-10	-6.6455e-11	-1.87234e-13	7.08801e-09	-1.37054e-10	9.34797e-11	-0.00937569	-2.64156e-05	-0.019336	0.0131884
397	2022-04-01 12:57:01	5091182	-1.11025e-10	-8.37782e-11	5.40518e-09	-1.12036e-10	2.81342e-10	-7.19442e-11	-1.67556e-13	5.37815e-09	-1.11924e-10	9.76257e-11	-0.0133771	-3.1155e-05	-0.0208109	0.0181523
398	2022-04-01 12:57:15	5105225	-1.02028e-10	-7.91096e-11	5.23223e-09	-1.19013e-10	2.88345e-10	-6.61141e-11	-1.58219e-13	5.20607e-09	-1.18894e-10	1.00056e-10	-0.0126994	-3.03913e-05	-0.0228376	0.0192191
399	2022-04-01 12:57:29	5119268	-1.02963e-10	-7.4185e-11	5.20663e-09	-1.18077e-10	2.74286e-10	-6.672e-11	-1.4837e-13	5.1806e-09	-1.17959e-10	9.51772e-11	-0.0128788	-2.86396e-05	-0.0227694	0.0183719
400	2022-04-01 12:57:43	5133312	-9.79645e-11	-8.29591e-11	5.38333e-09	-1.2241e-10	2.82724e-10	-6.3481e-11	-1.65918e-13	5.35641e-09	-1.22288e-10	9.81052e-11	-0.0118514	-3.09756e-05	-0.0228301	0.0183155
401	2022-04-01 12:57:57	5147355	-9.72551e-11	-7.37346e-11	5.55006e-09	-1.16648e-10	2.77871e-10	-6.30213e-11	-1.47469e-13	5.52231e-09	-1.16531e-10	9.64212e-11	-0.0114121	-2.67043e-05	-0.0211019	0.0174603
402	2022-04-01 12:58:11	5161398	-9.01278e-11	-7.35912e-11	5.65632e-09	-1.18314e-10	2.73594e-10	-5.84028e-11	-1.47182e-13	5.62804e-09	-1.18196e-10	9.49371e-11	-0.0103771	-2.61516e-05	-0.0210012	0.0168686
403	2022-04-01 12:58:25	5175442	-9.75023e-11	-7.56901e-11	6.29606e-09	-1.15659e-10	2.89635e-10	-6.31815e-11	-1.5138e-13	6.26458e-09	-1.15543e-10	1.00503e-10	-0.0100855	-2.41645e-05	-0.0184439	0.0160431
404	2022-04-01 12:58:39	5189485	-9.83838e-11	-8.11674e-11	6.31903e-08	-1.1482e-10	2.99801e-10	-6.37527e-11	-1.62335e-13	6.28743e-08	-1.14705e-10	1.04031e-10	-0.00101397	-2.58189e-06	-0.00182436	0.00165458
405	2022-04-01 12:58:54	5204039	-9.86096e-11	-7.93246e-11	2.01382e-07	-1.03382e-10	2.74784e-10	-6.3899e-11	-1.58649e-13	2.00375e-07	-1.03279e-10	9.535e-11	-0.000318897	-7.91761e-07	-0.000515426	0.000475858
406	2022-04-01 12:59:07	5217813	-1.09015e-10	-9.06889e-11	2.67316e-07	-1.11993e-10	2.52086e-10	-7.06417e-11	-1.81378e-13	2.65979e-07	-1.11881e-10	8.74738e-11	-0.000265591	-6.81924e-07	-0.000420638	0.000328874
407	2022-04-01 12:59:21	5231076	-1.01651e-10	-8.25496e-11	3.22409e-07	-1.07295e-10	2.3008e-10	-6.58698e-11	-1.65099e-13	3.20797e-07	-1.07188e-10	7.98378e-11	-0.000205332	-5.14653e-07	-0.000334129	0.000248873
408	2022-04-01 12:59:34	5244339	-1.09542e-10	-9.00644e-11	3.57437e-07	-1.1209e-10	2.21871e-10	-7.09832e-11	-1.80129e-13	3.5565e-07	-1.11978e-10	7.69892e-11	-0.000199587	-5.06478e-07	-0.000314854	0.000216475
409	2022-04-01 12:59:47	5257602	-1.13724e-10	-9.13953e-11	3.80549e-07	-1.15422e-10	2.09624e-10	-7.36932e-11	-1.82791e-13	3.78646e-07	-1.15307e-10	7.27395e-11	-0.000194623	-4.82748e-07	-0.000304523	0.000192104
410	2022-04-01 13:00:00	5270865	-1.0737e-10	-9.76505e-11	3.94255e-07	-1.19539e-10	1.98137e-10	-6.95758e-11	-1.95301e-13	3.92284e-07	-1.19419e-10	6.87535e-11	-0.000177361	-4.97856e-07	-0.000304421	0.000175265
411	2022-04-01 13:00:14	5284129	-1.12692e-10	-9.12417e-11	4.03303e-07	-1.13218e-10	1.86166e-10	-7.30244e-11	-1.82483e-13	4.01286e-07	-1.13105e-10	6.45996e-11	-0.000181976	-4.54746e-07	-0.000281855	0.000160981
412	2022-04-01 13:00:27	5297392	-9.90288e-11	-9.25112e-11	4.09842e-07	-1.18282e-10	3.73454e-10	-6.41707e-11	-1.85022e-13	4.07793e-07	-1.18164e-10	1.29589e-10	-0.000157361	-4.53717e-07	-0.000289764	0.00031778
413	2022-04-01 13:00:40	5310655	1.0477e-09	-8.97879e-11	3.90941e-07	-6.91653e-11	2.01099e-09	6.7891e-10	-1.79576e-13	3.88986e-07	-6.90961e-11	6.97814e-10	0.00174533	-4.61651e-07	-0.000177631	0.00179393
414	2022-04-01 13:00:53	5323918	4.93523e-09	-7.3796e-11	3.53674e-07	-8.64298e-12	3.12561e-09	3.19803e-09	-1.47592e-13	3.51906e-07	-8.63434e-12	1.08459e-09	0.00908775	-4.19408e-07	-2.45359e-05	0.00308204
415	2022-04-01 13:01:10	5340432	7.52431e-09	-7.22706e-11	3.62363e-07	2.72512e-11	3.52271e-09	4.87575e-09	-1.44541e-13	3.60551e-07	2.72239e-11	1.22238e-09	0.0135231	-4.0089e-07	7.55065e-05	0.00339031
416	2022-04-01 13:01:21	5351485	9.01494e-09	-7.89458e-11	3.65768e-07	3.03794e-11	3.35716e-09	5.84168e-09	-1.57892e-13	3.63939e-07	3.0349e-11	1.16493e-09	0.0160513	-4.33841e-07	8.33904e-05	0.0032009
417	2022-04-01 13:01:33	5363579	1.03495e-08	-7.40315e-11	3.69709e-07	4.26881e-11	2.97622e-09	6.70648e-09	-1.48063e-13	3.6786e-07	4.26454e-11	1.03275e-09	0.018231	-4.02498e-07	0.000115928	0.00280745
418	2022-04-01 13:01:44	5374102	1.12391e-08	-7.09806e-11	3.70784e-07	4.12369e-11	2.59219e-09	7.28294e-09	-1.41961e-13	3.6893e-07	4.11957e-11	8.9949e-10	0.0197407	-3.84792e-07	0.000111663	0.0024381
419	2022-04-01 13:01:54	5384626	1.18303e-08	-8.63991e-11	3.70337e-07	2.67782e-11	2.22089e-09	7.66603e-09	-1.72798e-13	3.68485e-07	2.67514e-11	7.70649e-10	0.0208042	-4.68942e-07	7.25983e-05	0.0020914
420	2022-04-01 13:02:05	5395149	1.21675e-08	-7.48812e-11	3.69172e-07	2.22847e-11	1.91151e-09	7.88454e-09	-1.49762e-13	3.67326e-07	2.22624e-11	6.63294e-10	0.0214647	-4.0771e-07	6.06067e-05	0.00180574
421	2022-04-01 13:02:15	5405672	1.25088e-08	-7.05608e-11	3.6953e-07	2.28974e-11	1.66233e-09	8.1057e-09	-1.41122e-13	3.67682e-07	2.28745e-11	5.76829e-10	0.0220454	-3.83814e-07	6.22127e-05	0.00156882
422	2022-04-01 13:02:26	5416195	1.28347e-08	-6.90558e-11	3.69351e-07	1.81352e-11	1.45386e-09	8.31689e-09	-1.38112e-13	3.67504e-07	1.81171e-11	5.04489e-10	0.0226307	-3.7581e-07	4.92976e-05	0.00137274
423	2022-04-01 13:02:36	5426718	1.2908e-08	-7.77377e-11	3.68276e-07	1.28569e-11	1.28346e-09	8.36438e-09	-1.55475e-13	3.66435e-07	1.2844e-11	4.45361e-10	0.0228264	-4.24292e-07	3.50514e-05	0.00121539
424	2022-04-01 13:02:47	5437241	1.27433e-08	-7.39496e-11	3.70337e-07	1.57594e-11	1.13827e-09	8.25766e-09	-1.47899e-13	3.68485e-07	1.57436e-11	3.9498e-10	0.0224097	-4.01371e-07	4.27253e-05	0.0010719
425	2022-04-01 13:02:57	5447765	1.13956e-08	-8.51603e-11	3.67738e-07	-2.14247e-11	8.73264e-10	7.38435e-09	-1.70321e-13	3.65899e-07	-2.14033e-11	3.03023e-10	0.0201814	-4.65485e-07	-5.8495e-05	0.000828158
426	2022-04-01 13:03:08	5458798	6.48843e-09	-8.52115e-11	3.13362e-07	-4.87726e-11	7.34729e-10	4.2045e-09	-1.70423e-13	3.11795e-07	-4.87238e-11	2.54951e-10	0.0134848	-5.46586e-07	-0.000156269	0.000817687
427	2022-04-01 13:03:19	5469851	4.53521e-09	-8.30206e-11	3.07628e-07	-6.15221e-11	6.38518e-10	2.93882e-09	-1.66041e-13	3.0609e-07	-6.14606e-11	2.21566e-10	0.00960115	-5.42459e-07	-0.000200793	0.000723858
428	2022-04-01 13:03:30	5480905	3.28745e-09	-7.58641e-11	3.0718e-07	-7.43253e-11	5.84514e-10	2.13027e-09	-1.51728e-13	3.05644e-07	-7.4251e-11	2.02826e-10	0.00696977	-4.96421e-07	-0.000242933	0.000663603
429	2022-04-01 13:03:41	5491958	2.37488e-09	-8.25189e-11	3.13003e-07	-6.69938e-11	5.34144e-10	1.53892e-09	-1.65038e-13	3.11438e-07	-6.69268e-11	1.85348e-10	0.00494134	-5.29922e-07	-0.000214896	0.000595136
430	2022-04-01 13:03:53	5503011	1.79898e-09	-8.24574e-11	3.23395e-07	-8.99881e-11	4.91635e-10	1.16574e-09	-1.64915e-13	3.21778e-07	-8.98981e-11	1.70597e-10	0.00362281	-5.12511e-07	-0.000279379	0.000530171
431	2022-04-01 13:04:04	5514065	1.31742e-09	-8.74025e-11	3.33608e-07	-9.9921e-11	4.59554e-10	8.53688e-10	-1.74805e-13	3.3194e-07	-9.98211e-11	1.59465e-10	0.00257181	-5.26616e-07	-0.00030072	0.000480404
432	2022-04-01 13:04:15	5525118	9.75367e-10	-9.74971e-11	3.42297e-07	-1.00007e-10	4.2682e-10	6.32038e-10	-1.94994e-13	3.40586e-07	-9.9907e-11	1.48107e-10	0.00185574	-5.72526e-07	-0.000293339	0.000434859
433	2022-04-01 13:04:27	5537211	6.64521e-10	-8.8242e-11	3.48926e-07	-1.12799e-10	3.99408e-10	4.3061e-10	-1.76484e-13	3.47181e-07	-1.12686e-10	1.38595e-10	0.0012403	-5.08334e-07	-0.000324574	0.000399199
434	2022-04-01 13:04:40	5550475	4.44436e-10	-7.03663e-11	3.52778e-07	-1.02243e-10	3.77171e-10	2.87995e-10	-1.40733e-13	3.51014e-07	-1.02141e-10	1.30878e-10	0.000820464	-4.00931e-07	-0.000290988	0.000372858
435	2022-04-01 13:04:53	5563738	3.12125e-10	-8.84263e-11	3.42208e-07	-1.0178e-10	4.13774e-10	2.02257e-10	-1.76853e-13	3.40497e-07	-1.01678e-10	1.4358e-10	0.000594005	-5.19396e-07	-0.000298617	0.000421677
436	2022-04-01 13:05:07	5577001	1.73698e-10	-8.51398e-11	2.49399e-07	-1.07478e-10	5.60726e-10	1.12556e-10	-1.7028e-13	2.48152e-07	-1.07371e-10	1.94572e-10	0.000453578	-6.86191e-07	-0.00043268	0.000784084
437	2022-04-01 13:05:20	5590264	8.15816e-11	-8.21298e-11	1.6107e-07	-1.18206e-10	6.59972e-10	5.28649e-11	-1.6426e-13	1.60265e-07	-1.18088e-10	2.2901e-10	0.00032986	-1.02493e-06	-0.00073683	0.00142895
438	2022-04-01 13:05:33	5603527	1.98767e-11	-7.44512e-11	1.01856e-07	-1.19647e-10	7.03356e-10	1.28801e-11	-1.48902e-13	1.01347e-07	-1.19527e-10	2.44065e-10	0.000127089	-1.46924e-06	-0.00117939	0.00240821
439	2022-04-01 13:05:46	5616791	-9.02998e-12	-7.5383e-11	6.34601e-08	-1.141e-10	7.00983e-10	-5.85143e-12	-1.50766e-13	6.31428e-08	-1.13986e-10	2.43241e-10	-9.26697e-05	-2.3877e-06	-0.00180521	0.00385224
440	2022-04-01 13:06:00	5630564	-4.19141e-11	-8.3256e-11	4.12843e-08	-1.15691e-10	6.83645e-10	-2.71603e-11	-1.66512e-13	4.10779e-08	-1.15575e-10	2.37225e-10	-0.000661191	-4.05357e-06	-0.00281357	0.005775
441	2022-04-01 13:06:14	5644078	-5.95441e-11	-8.2396e-11	2.77914e-08	-1.24603e-10	6.54804e-10	-3.85846e-11	-1.64792e-13	2.76524e-08	-1.24478e-10	2.27217e-10	-0.00139534	-5.9594e-06	-0.00450153	0.00821689
442	2022-04-01 13:06:27	5657591	-8.39466e-11	-7.40315e-11	1.96197e-08	-1.19937e-10	6.34441e-10	-5.43974e-11	-1.48063e-13	1.95216e-08	-1.19817e-10	2.20151e-10	-0.00278652	-7.58457e-06	-0.00613767	0.0112773
443	2022-04-01 13:06:41	5671104	-7.89693e-11	-8.15974e-11	1.46401e-08	-1.21937e-10	6.06583e-10	-5.11721e-11	-1.63195e-13	1.45669e-08	-1.21815e-10	2.10484e-10	-0.0035129	-1.12031e-05	-0.00836246	0.0144495
444	2022-04-01 13:06:54	5684617	-8.05818e-11	-8.33482e-11	1.15461e-08	-1.2371e-10	5.8271e-10	-5.2217e-11	-1.66696e-13	1.14884e-08	-1.23586e-10	2.022e-10	-0.00454521	-1.451e-05	-0.0107575	0.0176004
445	2022-04-01 13:07:08	5698131	-9.10631e-11	-7.77991e-11	9.6715e-09	-1.16701e-10	5.53286e-10	-5.90089e-11	-1.55598e-13	9.62314e-09	-1.16584e-10	1.9199e-10	-0.00613198	-1.61692e-05	-0.012115	0.0199509
446	2022-04-01 13:07:21	5711644	-9.14501e-11	-9.00541e-11	8.47167e-09	-1.2227e-10	5.28868e-10	-5.92597e-11	-1.80108e-13	8.42931e-09	-1.22148e-10	1.83517e-10	-0.00703019	-2.13669e-05	-0.0144908	0.0217713
447	2022-04-01 13:07:35	5725157	-9.76528e-11	-7.61098e-11	7.74894e-09	-1.15809e-10	5.05571e-10	-6.3279e-11	-1.5222e-13	7.7102e-09	-1.15693e-10	1.75433e-10	-0.00820719	-1.97426e-05	-0.0150052	0.0227534
448	2022-04-01 13:07:48	5738671	-9.68896e-11	-7.56287e-11	7.23483e-09	-1.18163e-10	4.88594e-10	-6.27845e-11	-1.51257e-13	7.19866e-09	-1.18045e-10	1.69542e-10	-0.00872169	-2.10119e-05	-0.0163982	0.0235519
449	2022-04-01 13:08:03	5753225	-9.52556e-11	-8.61944e-11	6.90968e-09	-1.20088e-10	4.75556e-10	-6.17256e-11	-1.72389e-13	6.87513e-09	-1.19968e-10	1.65018e-10	-0.0089781	-2.50743e-05	-0.0174495	0.0240021
450	2022-04-01 13:08:17	5767268	-8.97623e-11	-7.52806e-11	6.69383e-09	-1.14885e-10	4.59216e-10	-5.8166e-11	-1.50561e-13	6.66036e-09	-1.1477e-10	1.59348e-10	-0.00873316	-2.26056e-05	-0.0172318	0.0239248
451	2022-04-01 13:08:31	5781311	-1.01555e-10	-9.03408e-11	6.55687e-09	-1.29053e-10	4.47053e-10	-6.58076e-11	-1.80682e-13	6.52409e-09	-1.28924e-10	1.55127e-10	-0.0100869	-2.76945e-05	-0.0197612	0.0237776
452	2022-04-01 13:08:45	5795355	-9.06653e-11	-9.55105e-11	6.46256e-09	-1.26065e-10	4.3347e-10	-5.87511e-11	-1.91021e-13	6.43025e-09	-1.25939e-10	1.50414e-10	-0.00913668	-2.97066e-05	-0.0195854	0.0233916
453	2022-04-01 13:08:59	5809398	-9.97813e-11	-8.12698e-11	6.38883e-09	-1.20238e-10	4.20171e-10	-6.46583e-11	-1.6254e-13	6.35689e-09	-1.20118e-10	1.45799e-10	-0.0101714	-2.55691e-05	-0.0188957	0.0229357
454	2022-04-01 13:09:13	5823441	-1.17443e-10	-8.91531e-11	6.35108e-09	-1.1726e-10	4.13321e-10	-7.61031e-11	-1.78306e-13	6.31932e-09	-1.17143e-10	1.43422e-10	-0.0120429	-2.8216e-05	-0.0185372	0.0226958
455	2022-04-01 13:09:27	5837485	-9.31163e-11	-8.27544e-11	6.28653e-09	-1.24044e-10	3.98309e-10	-6.03394e-11	-1.65509e-13	6.2551e-09	-1.2392e-10	1.38213e-10	-0.00964643	-2.64598e-05	-0.019811	0.0220961
456	2022-04-01 13:09:41	5851528	-9.56318e-11	-8.36553e-11	6.25038e-09	-1.18572e-10	3.86054e-10	-6.19694e-11	-1.67311e-13	6.21913e-09	-1.18453e-10	1.33961e-10	-0.00996432	-2.69026e-05	-0.0190466	0.0215401
457	2022-04-01 13:09:55	5865571	-1.03371e-10	-8.76993e-11	6.23319e-09	-1.2657e-10	3.83068e-10	-6.69844e-11	-1.75399e-13	6.20202e-09	-1.26443e-10	1.32925e-10	-0.0108004	-2.82809e-05	-0.0203874	0.0214325
458	2022-04-01 13:10:09	5879615	-9.62231e-11	-8.70339e-11	6.21418e-09	-1.22829e-10	3.7512e-10	-6.23526e-11	-1.74068e-13	6.18311e-09	-1.22706e-10	1.30167e-10	-0.0100843	-2.81521e-05	-0.0198454	0.021052
459	2022-04-01 13:10:23	5893658	-1.01759e-10	-8.18125e-11	6.18684e-09	-1.31837e-10	3.67534e-10	-6.59398e-11	-1.63625e-13	6.15591e-09	-1.31705e-10	1.27534e-10	-0.0107116	-2.65802e-05	-0.0213949	0.0207174
460	2022-04-01 13:10:37	5907701	-9.83623e-11	-8.1792e-11	6.19889e-09	-1.24033e-10	3.62343e-10	-6.37388e-11	-1.63584e-13	6.1679e-09	-1.23909e-10	1.25733e-10	-0.010334	-2.65218e-05	-0.0200893	0.0203851
461	2022-04-01 13:10:51	5921745	-9.99855e-11	-9.17331e-11	6.14586e-09	-1.2385e-10	3.53152e-10	-6.47906e-11	-1.83466e-13	6.11513e-09	-1.23726e-10	1.22544e-10	-0.0105951	-3.0002e-05	-0.0202328	0.0200394
462	2022-04-01 13:11:05	5935788	-9.74593e-11	-9.20403e-11	6.11463e-09	-1.21034e-10	3.41772e-10	-6.31536e-11	-1.84081e-13	6.08406e-09	-1.20913e-10	1.18595e-10	-0.0103802	-3.02562e-05	-0.0198737	0.0194927
463	2022-04-01 13:11:19	5949831	-9.72228e-11	-9.19379e-11	6.11488e-09	-1.16508e-10	3.41174e-10	-6.30004e-11	-1.83876e-13	6.08431e-09	-1.16391e-10	1.18387e-10	-0.0103546	-3.02213e-05	-0.0191298	0.0194578
464	2022-04-01 13:11:33	5963874	-1.08574e-10	-7.52806e-11	6.1032e-09	-1.20958e-10	3.47884e-10	-7.0356e-11	-1.50561e-13	6.07268e-09	-1.20837e-10	1.20716e-10	-0.0115856	-2.47932e-05	-0.0198985	0.0198785
465	2022-04-01 13:11:47	5977918	-9.79753e-11	-7.59255e-11	6.09998e-09	-1.21894e-10	3.31629e-10	-6.3488e-11	-1.51851e-13	6.06948e-09	-1.21772e-10	1.15075e-10	-0.0104602	-2.50188e-05	-0.020063	0.0189597
466	2022-04-01 13:12:01	5991961	-1.08478e-10	-7.9345e-11	6.05953e-09	-1.25226e-10	3.27106e-10	-7.02937e-11	-1.5869e-13	6.02923e-09	-1.25101e-10	1.13506e-10	-0.0116588	-2.63201e-05	-0.020749	0.0188259
467	2022-04-01 13:12:16	6006004	-1.02673e-10	-7.93246e-11	6.06196e-09	-1.24775e-10	3.25978e-10	-6.65321e-11	-1.58649e-13	6.03165e-09	-1.2465e-10	1.13114e-10	-0.0110305	-2.63028e-05	-0.020666	0.0187535
468	2022-04-01 13:12:30	6020048	-1.03812e-10	-7.94474e-11	6.06033e-09	-1.2356e-10	3.16456e-10	-6.72702e-11	-1.58895e-13	6.03003e-09	-1.23436e-10	1.0981e-10	-0.0111559	-2.63506e-05	-0.0204703	0.0182106
469	2022-04-01 13:12:44	6034091	-1.08123e-10	-8.43515e-11	6.02588e-09	-1.2829e-10	3.16449e-10	-7.00637e-11	-1.68703e-13	5.99575e-09	-1.28162e-10	1.09808e-10	-0.0116856	-2.81371e-05	-0.0213754	0.0183143
470	2022-04-01 13:12:58	6048134	-1.11455e-10	-7.38268e-11	6.03868e-09	-1.14637e-10	3.14636e-10	-7.22228e-11	-1.47654e-13	6.00849e-09	-1.14522e-10	1.09179e-10	-0.0120201	-2.45742e-05	-0.0190601	0.0181707
471	2022-04-01 13:13:12	6062178	-9.70938e-11	-8.19353e-11	6.02213e-09	-1.31375e-10	3.16295e-10	-6.29168e-11	-1.63871e-13	5.99202e-09	-1.31244e-10	1.09754e-10	-0.0105001	-2.73481e-05	-0.0219031	0.0183168
472	2022-04-01 13:13:26	6076221	-1.08316e-10	-7.74408e-11	6.01551e-09	-1.22582e-10	3.11549e-10	-7.01888e-11	-1.54882e-13	5.98543e-09	-1.22459e-10	1.08108e-10	-0.0117266	-2.58764e-05	-0.0204596	0.0180618
473	2022-04-01 13:13:40	6090264	-9.80398e-11	-7.01103e-11	6.02536e-09	-1.20883e-10	3.05369e-10	-6.35298e-11	-1.40221e-13	5.99523e-09	-1.20762e-10	1.05963e-10	-0.0105967	-2.33887e-05	-0.020143	0.0176745
474	2022-04-01 13:13:54	6104308	-9.47933e-11	-8.3942e-11	6.01533e-09	-1.14928e-10	3.05031e-10	-6.14261e-11	-1.67884e-13	5.98525e-09	-1.14813e-10	1.05846e-10	-0.0102629	-2.80496e-05	-0.0191827	0.0176844
475	2022-04-01 13:14:08	6118351	-1.02135e-10	-8.30717e-11	5.99368e-09	-1.17637e-10	3.09054e-10	-6.61835e-11	-1.66143e-13	5.96371e-09	-1.17519e-10	1.07242e-10	-0.0110977	-2.78591e-05	-0.0197057	0.0179824
476	2022-04-01 13:14:22	6132394	-1.04586e-10	-7.58027e-11	5.98777e-09	-1.22582e-10	2.98066e-10	-6.77717e-11	-1.51605e-13	5.95783e-09	-1.22459e-10	1.03429e-10	-0.0113752	-2.54464e-05	-0.0205544	0.0173602
477	2022-04-01 13:14:36	6146437	-9.12351e-11	-7.95703e-11	6.00648e-09	-1.16637e-10	2.96653e-10	-5.91203e-11	-1.59141e-13	5.97645e-09	-1.1652e-10	1.02939e-10	-0.00989222	-2.6628e-05	-0.0194966	0.017224
478	2022-04-01 13:14:50	6160481	-1.03318e-10	-8.82522e-11	5.97996e-09	-1.21206e-10	2.95639e-10	-6.69501e-11	-1.76504e-13	5.95006e-09	-1.21085e-10	1.02587e-10	-0.011252	-2.96643e-05	-0.0203502	0.0172413
479	2022-04-01 13:15:04	6174524	-1.00168e-10	-8.45972e-11	5.97579e-09	-1.16422e-10	2.8469e-10	-6.49089e-11	-1.69194e-13	5.94591e-09	-1.16306e-10	9.87874e-11	-0.0109166	-2.84556e-05	-0.0195606	0.0166143
480	2022-04-01 13:15:18	6188568	-8.97301e-11	-7.8782e-11	5.98919e-09	-1.23915e-10	2.82056e-10	-5.81451e-11	-1.57564e-13	5.95924e-09	-1.23791e-10	9.78734e-11	-0.00975713	-2.64403e-05	-0.020773	0.0164238
481	2022-04-01 13:15:32	6202611	-9.90611e-11	-7.74817e-11	5.97108e-09	-1.26097e-10	2.84936e-10	-6.41916e-11	-1.54963e-13	5.94122e-09	-1.25971e-10	9.88728e-11	-0.0108044	-2.60827e-05	-0.0212029	0.0166418
482	2022-04-01 13:15:46	6216654	-1.07145e-10	-8.83034e-11	5.93992e-09	-1.14078e-10	2.77503e-10	-6.943e-11	-1.76607e-13	5.91022e-09	-1.13964e-10	9.62935e-11	-0.0117474	-2.98816e-05	-0.0192825	0.0162927
483	2022-04-01 13:16:00	6230698	-9.79645e-11	-8.44231e-11	5.95056e-09	-1.23624e-10	2.82217e-10	-6.3481e-11	-1.68846e-13	5.92081e-09	-1.235e-10	9.79293e-11	-0.0107217	-2.85174e-05	-0.0208587	0.0165399
484	2022-04-01 13:16:14	6244741	-9.40731e-11	-7.65501e-11	5.94765e-09	-1.1726e-10	2.79054e-10	-6.09594e-11	-1.531e-13	5.91791e-09	-1.17143e-10	9.68317e-11	-0.0103008	-2.58706e-05	-0.0197946	0.0163625
485	2022-04-01 13:16:28	6258784	-1.04199e-10	-8.2222e-11	5.94527e-09	-1.20496e-10	2.79937e-10	-6.7521e-11	-1.64444e-13	5.91554e-09	-1.20376e-10	9.71381e-11	-0.0114142	-2.77986e-05	-0.020349	0.0164208
486	2022-04-01 13:16:42	6272828	-1.10918e-10	-8.08808e-11	5.95098e-09	-1.30967e-10	2.72327e-10	-7.18749e-11	-1.61762e-13	5.92123e-09	-1.30836e-10	9.44975e-11	-0.0121385	-2.73189e-05	-0.0220961	0.0159591
487	2022-04-01 13:16:56	6286871	-1.08736e-10	-8.51808e-11	5.92158e-09	-1.27742e-10	2.68956e-10	-7.04609e-11	-1.70362e-13	5.89197e-09	-1.27614e-10	9.33277e-11	-0.0119588	-2.89142e-05	-0.021659	0.0158398
488	2022-04-01 13:17:10	6300914	-1.08015e-10	-8.71772e-11	5.9131e-09	-1.3216e-10	2.74016e-10	-6.99937e-11	-1.74354e-13	5.88353e-09	-1.32028e-10	9.50836e-11	-0.0118965	-2.96343e-05	-0.0224402	0.016161
489	2022-04-01 13:17:24	6314957	-9.95985e-11	-8.50272e-11	5.91804e-09	-1.22958e-10	2.69586e-10	-6.45398e-11	-1.70054e-13	5.88845e-09	-1.22835e-10	9.35463e-11	-0.0109604	-2.88793e-05	-0.0208603	0.0158864
490	2022-04-01 13:17:39	6329001	-9.32561e-11	-9.28287e-11	5.93497e-09	-1.23001e-10	2.68872e-10	-6.043e-11	-1.85657e-13	5.9053e-09	-1.22878e-10	9.32986e-11	-0.0102332	-3.14391e-05	-0.0208081	0.0157991
491	2022-04-01 13:17:53	6343044	-9.50943e-11	-8.32355e-11	6.29785e-09	-1.32138e-10	2.70093e-10	-6.16211e-11	-1.66471e-13	6.26636e-09	-1.32006e-10	9.37223e-11	-0.00983364	-2.65658e-05	-0.0210658	0.0149564
492	2022-04-01 13:18:07	6357087	-1.03038e-10	-8.58053e-11	5.287e-09	-1.2528e-10	2.64188e-10	-6.67686e-11	-1.71611e-13	5.26056e-09	-1.25155e-10	9.16732e-11	-0.0126923	-3.26221e-05	-0.0237911	0.0174265
493	2022-04-01 13:18:21	6371131	-1.10767e-10	-7.9857e-11	5.18704e-09	-1.31558e-10	2.75015e-10	-7.1777e-11	-1.59714e-13	5.1611e-09	-1.31426e-10	9.54302e-11	-0.0139073	-3.09457e-05	-0.0254648	0.0184903
494	2022-04-01 13:18:35	6385174	-1.04468e-10	-6.27184e-11	5.26874e-09	-1.29945e-10	2.68235e-10	-6.76953e-11	-1.25437e-13	5.2424e-09	-1.29815e-10	9.30775e-11	-0.012913	-2.39274e-05	-0.0247625	0.0177548
495	2022-04-01 13:18:49	6399218	-1.05769e-10	-8.37577e-11	5.44918e-09	-1.25334e-10	2.63451e-10	-6.85383e-11	-1.67515e-13	5.42193e-09	-1.25209e-10	9.14175e-11	-0.0126409	-3.08959e-05	-0.023093	0.0168607
496	2022-04-01 13:19:03	6413261	-1.07026e-10	-7.57106e-11	5.58083e-09	-1.19679e-10	2.62238e-10	-6.93528e-11	-1.51421e-13	5.55293e-09	-1.19559e-10	9.09966e-11	-0.0124894	-2.72687e-05	-0.0215309	0.0163871
497	2022-04-01 13:19:17	6427304	-1.06596e-10	-8.17612e-11	5.64883e-09	-1.21163e-10	2.63942e-10	-6.90742e-11	-1.63522e-13	5.62059e-09	-1.21042e-10	9.15879e-11	-0.0122895	-2.90935e-05	-0.0215354	0.0162951
498	2022-04-01 13:19:31	6441348	-1.0909e-10	-8.11368e-11	1.76148e-08	-1.20851e-10	2.96861e-10	-7.06903e-11	-1.62274e-13	1.75267e-08	-1.2073e-10	1.03011e-10	-0.00403329	-9.25864e-06	-0.00688835	0.00587735
499	2022-04-01 13:19:45	6455901	-1.05726e-10	-8.46791e-11	1.09202e-07	-1.194e-10	2.91954e-10	-6.85104e-11	-1.69358e-13	1.08656e-07	-1.19281e-10	1.01308e-10	-0.000630526	-1.55866e-06	-0.00109778	0.000932374
500	2022-04-01 13:19:59	6469675	-1.09746e-10	-9.44667e-11	2.30139e-07	-1.07822e-10	2.45606e-10	-7.11154e-11	-1.88933e-13	2.28988e-07	-1.07714e-10	8.52253e-11	-0.000310563	-8.25079e-07	-0.000470392	0.000372182
501	2022-04-01 13:20:12	6482938	-1.20561e-10	-8.64912e-11	3.02163e-07	-1.2155e-10	2.24129e-10	-7.81235e-11	-1.72982e-13	3.00652e-07	-1.21428e-10	7.77728e-11	-0.000259847	-5.75357e-07	-0.000403883	0.00025868
502	2022-04-01 13:20:26	6496201	-1.16454e-10	-9.10677e-11	3.32174e-07	-1.12079e-10	2.13064e-10	-7.54622e-11	-1.82135e-13	3.30513e-07	-1.11967e-10	7.39332e-11	-0.000228318	-5.51069e-07	-0.000338767	0.000223692
503	2022-04-01 13:20:39	6509465	-1.1812e-10	-8.96446e-11	3.56541e-07	-1.30408e-10	1.95557e-10	-7.65418e-11	-1.79289e-13	3.54758e-07	-1.30278e-10	6.78583e-11	-0.000215757	-5.05384e-07	-0.000367229	0.00019128
504	2022-04-01 13:20:52	6522728	-1.17991e-10	-9.94933e-11	3.71859e-07	-1.25441e-10	1.93338e-10	-7.64582e-11	-1.98987e-13	3.7e-07	-1.25316e-10	6.70883e-11	-0.000206644	-5.37802e-07	-0.000338691	0.00018132
505	2022-04-01 13:21:05	6535991	-1.0421e-10	-9.77219e-11	3.93091e-07	-1.13337e-10	1.84784e-10	-6.75281e-11	-1.95444e-13	3.91126e-07	-1.13224e-10	6.412e-11	-0.000172651	-4.99696e-07	-0.000289482	0.000163937
506	2022-04-01 13:21:19	6549254	-1.12735e-10	-1.0105e-10	4.02945e-07	-1.15659e-10	1.76046e-10	-7.30523e-11	-2.021e-13	4.0093e-07	-1.15543e-10	6.1088e-11	-0.000182207	-5.04078e-07	-0.000288188	0.000152366
507	2022-04-01 13:21:32	6562517	-5.84476e-11	-9.95543e-11	4.05722e-07	-1.06661e-10	8.11386e-10	-3.7874e-11	-1.99109e-13	4.03693e-07	-1.06554e-10	2.81551e-10	-9.38188e-05	-4.93217e-07	-0.000263949	0.000697438
508	2022-04-01 13:21:45	6575781	2.47185e-09	-9.53267e-11	3.87537e-07	-3.92374e-11	2.46373e-09	1.60176e-09	-1.90653e-13	3.85599e-07	-3.91982e-11	8.54914e-10	0.00415395	-4.94434e-07	-0.000101655	0.00221711
509	2022-04-01 13:22:02	6592295	5.91555e-09	-7.90891e-11	3.58153e-07	-9.02998e-12	3.33213e-09	3.83328e-09	-1.58178e-13	3.56362e-07	-9.02095e-12	1.15625e-09	0.0107567	-4.43869e-07	-2.5314e-05	0.00324459
510	2022-04-01 13:22:13	6603348	7.87697e-09	-8.95115e-11	3.62722e-07	1.99089e-11	3.44108e-09	5.10428e-09	-1.79023e-13	3.60908e-07	1.9889e-11	1.19405e-09	0.0141429	-4.96034e-07	5.51081e-05	0.00330847
511	2022-04-01 13:22:24	6614401	9.35721e-09	-8.36655e-11	3.66574e-07	4.15486e-11	3.21904e-09	6.06347e-09	-1.67331e-13	3.64741e-07	4.15071e-11	1.11701e-09	0.016624	-4.58766e-07	0.000113799	0.00306246
512	2022-04-01 13:22:36	6626495	1.05792e-08	-7.1175e-11	3.68992e-07	4.33869e-11	2.82702e-09	6.85532e-09	-1.4235e-13	3.67147e-07	4.33435e-11	9.80976e-10	0.0186719	-3.87719e-07	0.000118055	0.00267189
513	2022-04-01 13:22:47	6637018	1.13466e-08	-8.25598e-11	3.6953e-07	3.11857e-11	2.43923e-09	7.3526e-09	-1.6512e-13	3.67682e-07	3.11545e-11	8.46413e-10	0.0199971	-4.49082e-07	8.47321e-05	0.00230202
514	2022-04-01 13:22:57	6647541	1.18773e-08	-8.33993e-11	3.68187e-07	2.98634e-11	2.09273e-09	7.69649e-09	-1.66799e-13	3.66346e-07	2.98335e-11	7.26177e-10	0.0210088	-4.55303e-07	8.14354e-05	0.00198222
515	2022-04-01 13:23:08	6658065	1.222e-08	-7.94372e-11	3.68008e-07	1.40072e-11	1.80529e-09	7.91856e-09	-1.58874e-13	3.66168e-07	1.39932e-11	6.26436e-10	0.0216255	-4.33884e-07	3.82152e-05	0.00171079
516	2022-04-01 13:23:18	6668587	1.25115e-08	-7.70722e-11	3.66395e-07	8.87948e-12	1.56551e-09	8.10745e-09	-1.54144e-13	3.64563e-07	8.8706e-12	5.43232e-10	0.0222388	-4.2282e-07	2.43321e-05	0.00149009
517	2022-04-01 13:23:29	6679111	1.27668e-08	-8.08501e-11	3.66305e-07	1.25667e-11	1.37396e-09	8.27289e-09	-1.617e-13	3.64473e-07	1.25541e-11	4.76764e-10	0.0226982	-4.43654e-07	3.44446e-05	0.00130809
518	2022-04-01 13:23:39	6689634	1.29577e-08	-7.87512e-11	3.6747e-07	1.50607e-11	1.21979e-09	8.39659e-09	-1.57502e-13	3.65633e-07	1.50456e-11	4.23267e-10	0.0229646	-4.30767e-07	4.11496e-05	0.00115763
519	2022-04-01 13:23:50	6700157	1.22899e-08	-8.43925e-11	3.55913e-07	1.09649e-12	1.11051e-09	7.96386e-09	-1.68785e-13	3.54133e-07	1.09539e-12	3.85347e-10	0.0224883	-4.76614e-07	3.09317e-06	0.00108814
520	2022-04-01 13:24:00	6710680	9.98942e-09	-7.8567e-11	3.39162e-07	-3.83021e-11	8.13443e-10	6.47314e-09	-1.57134e-13	3.37466e-07	-3.82638e-11	2.82265e-10	0.0191816	-4.65629e-07	-0.000113386	0.000836424
521	2022-04-01 13:24:11	6721714	5.85808e-09	-8.82522e-11	3.1157e-07	-5.74586e-11	6.90394e-10	3.79604e-09	-1.76504e-13	3.10012e-07	-5.74011e-11	2.39567e-10	0.0122448	-5.69347e-07	-0.000185158	0.000772766
522	2022-04-01 13:24:22	6732767	4.14718e-09	-8.65527e-11	3.07359e-07	-6.70798e-11	6.06038e-10	2.68737e-09	-1.73105e-13	3.05822e-07	-6.70127e-11	2.10295e-10	0.00878737	-5.66033e-07	-0.000219123	0.000687639
523	2022-04-01 13:24:33	6743820	2.96549e-09	-1.02401e-10	3.06463e-07	-7.91736e-11	5.50537e-10	1.92164e-09	-2.04802e-13	3.04931e-07	-7.90944e-11	1.91036e-10	0.00630188	-6.71635e-07	-0.000259385	0.000626491
524	2022-04-01 13:24:44	6754873	2.19201e-09	-8.46074e-11	3.15063e-07	-8.15708e-11	5.08934e-10	1.42042e-09	-1.69215e-13	3.13488e-07	-8.14892e-11	1.766e-10	0.00453103	-5.39781e-07	-0.000259944	0.00056334
525	2022-04-01 13:24:55	6765926	1.61719e-09	-7.93655e-11	3.25366e-07	-9.56211e-11	4.70143e-10	1.04794e-09	-1.58731e-13	3.23739e-07	-9.55255e-11	1.6314e-10	0.00323699	-4.90305e-07	-0.000295069	0.000503923
526	2022-04-01 13:25:06	6776980	1.20883e-09	-7.91812e-11	3.34772e-07	-9.15898e-11	4.43483e-10	7.83322e-10	-1.58362e-13	3.33098e-07	-9.14982e-11	1.53889e-10	0.00235162	-4.75423e-07	-0.000274688	0.000461992
527	2022-04-01 13:25:19	6789074	8.34273e-10	-8.66346e-11	3.44357e-07	-1.06209e-10	4.06264e-10	5.40609e-10	-1.73269e-13	3.42635e-07	-1.06103e-10	1.40974e-10	0.0015778	-5.05696e-07	-0.000309667	0.000411439
528	2022-04-01 13:25:32	6802337	5.81842e-10	-8.72079e-11	3.50628e-07	-9.9362e-11	3.77478e-10	3.77034e-10	-1.74416e-13	3.48875e-07	-9.92626e-11	1.30985e-10	0.00108071	-4.99938e-07	-0.000284522	0.000375449
529	2022-04-01 13:25:45	6815600	3.82839e-10	-8.88665e-11	3.53763e-07	-1.15583e-10	3.53981e-10	2.4808e-10	-1.77733e-13	3.51994e-07	-1.15467e-10	1.22831e-10	0.000704783	-5.04932e-07	-0.000328038	0.000348959
530	2022-04-01 13:25:58	6828863	2.61557e-10	-8.06146e-11	3.13988e-07	-1.16443e-10	4.54248e-10	1.69489e-10	-1.61229e-13	3.12418e-07	-1.16327e-10	1.57624e-10	0.000542507	-5.16069e-07	-0.000372343	0.000504529
531	2022-04-01 13:26:12	6842126	1.39255e-10	-8.15155e-11	2.12849e-07	-1.14035e-10	5.84599e-10	9.02372e-11	-1.63031e-13	2.11785e-07	-1.13921e-10	2.02856e-10	0.00042608	-7.69796e-07	-0.000537909	0.00095784
532	2022-04-01 13:26:25	6855390	5.97591e-11	-8.54368e-11	1.35628e-07	-1.04221e-10	6.55449e-10	3.87239e-11	-1.70874e-13	1.3495e-07	-1.04117e-10	2.27441e-10	0.00028695	-1.2662e-06	-0.000771522	0.00168537
533	2022-04-01 13:26:38	6868653	9.88998e-13	-9.07401e-11	8.61783e-08	-1.23721e-10	6.9054e-10	6.40871e-13	-1.8148e-13	8.57474e-08	-1.23597e-10	2.39617e-10	7.47394e-06	-2.11645e-06	-0.00144141	0.00279446
534	2022-04-01 13:26:51	6881916	-1.81674e-11	-8.20991e-11	5.40052e-08	-1.18056e-10	6.78884e-10	-1.17725e-11	-1.64198e-13	5.37352e-08	-1.17938e-10	2.35573e-10	-0.000219083	-3.05569e-06	-0.0021948	0.00438396
535	2022-04-01 13:27:05	6895690	-5.96624e-11	-8.9747e-11	3.55521e-08	-1.11047e-10	6.61369e-10	-3.86612e-11	-1.79494e-13	3.53743e-08	-1.10936e-10	2.29495e-10	-0.00109292	-5.07413e-06	-0.00313606	0.00648761
536	2022-04-01 13:27:19	6909203	-5.90711e-11	-8.3215e-11	2.43363e-08	-1.14121e-10	6.34333e-10	-3.82781e-11	-1.6643e-13	2.42146e-08	-1.14007e-10	2.20114e-10	-0.00158078	-6.87312e-06	-0.00470818	0.00909011
537	2022-04-01 13:27:32	6922717	-6.55963e-11	-9.66267e-11	1.74832e-08	-1.18497e-10	6.10576e-10	-4.25064e-11	-1.93253e-13	1.73958e-08	-1.18379e-10	2.1187e-10	-0.00244349	-1.11092e-05	-0.00680501	0.0121794
538	2022-04-01 13:27:46	6936230	-8.11301e-11	-8.24063e-11	1.33355e-08	-1.20636e-10	5.87133e-10	-5.25723e-11	-1.64813e-13	1.32688e-08	-1.20515e-10	2.03735e-10	-0.00396209	-1.2421e-05	-0.0090826	0.0153544
539	2022-04-01 13:27:59	6949743	-8.10333e-11	-8.30717e-11	1.07045e-08	-1.27247e-10	5.61341e-10	-5.25096e-11	-1.66143e-13	1.0651e-08	-1.2712e-10	1.94785e-10	-0.00493002	-1.55989e-05	-0.011935	0.018288
540	2022-04-01 13:28:13	6963256	-8.22266e-11	-8.2263e-11	9.19058e-09	-1.18056e-10	5.35088e-10	-5.32828e-11	-1.64526e-13	9.14463e-09	-1.17938e-10	1.85676e-10	-0.00582668	-1.79915e-05	-0.012897	0.0203043
541	2022-04-01 13:28:26	6976770	-8.31833e-11	-8.16998e-11	8.15314e-09	-1.17078e-10	5.13012e-10	-5.39028e-11	-1.634e-13	8.11237e-09	-1.16961e-10	1.78015e-10	-0.00664451	-2.0142e-05	-0.0144176	0.0219437
542	2022-04-01 13:28:40	6990283	-8.69028e-11	-6.54008e-11	7.54066e-09	-1.21593e-10	5.01732e-10	-5.6313e-11	-1.30802e-13	7.50296e-09	-1.21471e-10	1.74101e-10	-0.00750544	-1.74333e-05	-0.0161898	0.0232043
543	2022-04-01 13:28:53	7003796	-8.33768e-11	-7.80449e-11	7.10448e-09	-1.16873e-10	4.78074e-10	-5.40282e-11	-1.5609e-13	7.06896e-09	-1.16756e-10	1.65892e-10	-0.00764302	-2.2081e-05	-0.0165167	0.0234676
544	2022-04-01 13:29:08	7018350	-8.66771e-11	-7.30077e-11	6.8205e-09	-1.23495e-10	4.58924e-10	-5.61668e-11	-1.46015e-13	6.7864e-09	-1.23372e-10	1.59247e-10	-0.00827637	-2.15159e-05	-0.0181792	0.0234656
545	2022-04-01 13:29:22	7032394	-8.79993e-11	-7.76865e-11	6.64425e-09	-1.24506e-10	4.48619e-10	-5.70235e-11	-1.55373e-13	6.61103e-09	-1.24381e-10	1.55671e-10	-0.00862552	-2.35021e-05	-0.0188142	0.0235471
546	2022-04-01 13:29:36	7046437	-1.01307e-10	-8.34403e-11	6.52231e-09	-1.22377e-10	4.38315e-10	-6.56469e-11	-1.66881e-13	6.4897e-09	-1.22255e-10	1.52095e-10	-0.0101156	-2.57147e-05	-0.0188383	0.0234364
547	2022-04-01 13:29:50	7060480	-9.50728e-11	-7.81984e-11	6.4345e-09	-1.17766e-10	4.19226e-10	-6.16072e-11	-1.56397e-13	6.40233e-09	-1.17648e-10	1.45471e-10	-0.00962262	-2.44281e-05	-0.0183759	0.0227216
548	2022-04-01 13:30:04	7074524	-8.74618e-11	-8.26622e-11	6.37542e-09	-1.15788e-10	4.09067e-10	-5.66752e-11	-1.65324e-13	6.34354e-09	-1.15672e-10	1.41946e-10	-0.00893432	-2.60618e-05	-0.0182346	0.0223765
549	2022-04-01 13:30:18	7088567	-8.75263e-11	-7.45639e-11	6.32799e-09	-1.26043e-10	4.00651e-10	-5.6717e-11	-1.49128e-13	6.29635e-09	-1.25917e-10	1.39026e-10	-0.00900792	-2.36848e-05	-0.0199984	0.0220804
550	2022-04-01 13:30:32	7102610	-1.05898e-10	-8.12187e-11	6.27992e-09	-1.19797e-10	3.8726e-10	-6.86219e-11	-1.62437e-13	6.24852e-09	-1.19677e-10	1.34379e-10	-0.0109821	-2.59961e-05	-0.0191529	0.0215058
551	2022-04-01 13:30:46	7116653	-9.59651e-11	-8.25393e-11	6.23913e-09	-1.3173e-10	3.73984e-10	-6.21854e-11	-1.65079e-13	6.20793e-09	-1.31598e-10	1.29772e-10	-0.0100171	-2.65916e-05	-0.0211984	0.0209043
552	2022-04-01 13:31:00	7130697	-8.91603e-11	-8.49555e-11	6.23124e-09	-1.13197e-10	3.6652e-10	-5.77759e-11	-1.69911e-13	6.20008e-09	-1.13084e-10	1.27182e-10	-0.00931856	-2.74046e-05	-0.0182391	0.020513
553	2022-04-01 13:31:14	7144740	-8.46668e-11	-8.63991e-11	6.18042e-09	-1.22969e-10	3.66382e-10	-5.48641e-11	-1.72798e-13	6.14952e-09	-1.22846e-10	1.27135e-10	-0.00892169	-2.80995e-05	-0.0199765	0.0206739
554	2022-04-01 13:31:28	7158784	-9.16113e-11	-7.93246e-11	6.18669e-09	-1.28913e-10	3.57467e-10	-5.93641e-11	-1.58649e-13	6.15576e-09	-1.28784e-10	1.24041e-10	-0.00964368	-2.57725e-05	-0.0209209	0.0201504
555	2022-04-01 13:31:42	7172827	-9.56748e-11	-8.17715e-11	6.14795e-09	-1.31956e-10	3.57721e-10	-6.19973e-11	-1.63543e-13	6.11721e-09	-1.31824e-10	1.24129e-10	-0.0101349	-2.67349e-05	-0.0215497	0.0202918
556	2022-04-01 13:31:56	7186870	-8.57418e-11	-8.08808e-11	6.15463e-09	-1.19346e-10	3.48652e-10	-5.55607e-11	-1.61762e-13	6.12386e-09	-1.19227e-10	1.20982e-10	-0.00907283	-2.6415e-05	-0.0194692	0.0197559
557	2022-04-01 13:32:10	7200913	-1.01942e-10	-7.43079e-11	6.13752e-09	-1.1998e-10	3.41066e-10	-6.60584e-11	-1.48616e-13	6.10683e-09	-1.1986e-10	1.1835e-10	-0.0108171	-2.4336e-05	-0.0196272	0.0193799
558	2022-04-01 13:32:24	7214957	-9.73303e-11	-7.73998e-11	6.12402e-09	-1.23452e-10	3.30201e-10	-6.307e-11	-1.548e-13	6.0934e-09	-1.23329e-10	1.1458e-10	-0.0103505	-2.54045e-05	-0.0202397	0.0188039
559	2022-04-01 13:32:39	7229000	-9.74915e-11	-6.88715e-11	6.10464e-09	-1.19647e-10	3.31145e-10	-6.31745e-11	-1.37743e-13	6.07412e-09	-1.19527e-10	1.14907e-10	-0.0104006	-2.2677e-05	-0.0196781	0.0189175
560	2022-04-01 13:32:53	7243044	-9.72981e-11	-7.31101e-11	6.08572e-09	-1.16379e-10	3.23029e-10	-6.30492e-11	-1.4622e-13	6.05529e-09	-1.16263e-10	1.12091e-10	-0.0104122	-2.41475e-05	-0.0192002	0.0185113
561	2022-04-01 13:33:07	7257087	-1.05833e-10	-8.20684e-11	6.06788e-09	-1.24173e-10	3.19067e-10	-6.85798e-11	-1.64137e-13	6.03754e-09	-1.24049e-10	1.10716e-10	-0.0113589	-2.7186e-05	-0.0205463	0.018338
562	2022-04-01 13:33:21	7271130	-9.80721e-11	-7.24036e-11	6.06167e-09	-1.18249e-10	3.09116e-10	-6.35507e-11	-1.44807e-13	6.03136e-09	-1.18131e-10	1.07263e-10	-0.0105367	-2.4009e-05	-0.0195861	0.0177843
563	2022-04-01 13:33:35	7285173	-1.00877e-10	-8.58258e-11	6.04711e-09	-1.16325e-10	3.09231e-10	-6.53683e-11	-1.71652e-13	6.01687e-09	-1.16209e-10	1.07303e-10	-0.0108642	-2.85284e-05	-0.0193138	0.0178337
564	2022-04-01 13:33:49	7299217	-9.77388e-11	-7.85465e-11	6.03861e-09	-1.26742e-10	3.06481e-10	-6.33347e-11	-1.57093e-13	6.00842e-09	-1.26615e-10	1.06349e-10	-0.010541	-2.61455e-05	-0.021073	0.0177
565	2022-04-01 13:34:03	7313260	-9.47181e-11	-7.71644e-11	6.03605e-09	-1.24087e-10	3.05437e-10	-6.13773e-11	-1.54329e-13	6.00587e-09	-1.23963e-10	1.05987e-10	-0.0102196	-2.56963e-05	-0.0206403	0.0176472
566	2022-04-01 13:34:17	7327303	-9.60296e-11	-7.78606e-11	6.01781e-09	-1.21292e-10	2.93812e-10	-6.22272e-11	-1.55721e-13	5.98772e-09	-1.21171e-10	1.01953e-10	-0.0103925	-2.60068e-05	-0.0202365	0.017027
567	2022-04-01 13:34:31	7341347	-9.73195e-11	-6.98031e-11	6.02694e-09	-1.12391e-10	2.93643e-10	-6.3063e-11	-1.39606e-13	5.99681e-09	-1.12279e-10	1.01894e-10	-0.0105161	-2.32801e-05	-0.0187231	0.0169914
568	2022-04-01 13:34:45	7355390	-1.06704e-10	-8.14541e-11	6.04262e-09	-1.17873e-10	2.99202e-10	-6.91442e-11	-1.62908e-13	6.01241e-09	-1.17755e-10	1.03823e-10	-0.0115003	-2.70953e-05	-0.0195854	0.0172681
569	2022-04-01 13:34:59	7369433	-9.40516e-11	-8.1403e-11	6.01563e-09	-1.20055e-10	2.93943e-10	-6.09454e-11	-1.62806e-13	5.98555e-09	-1.19935e-10	1.01998e-10	-0.0101821	-2.71998e-05	-0.0200374	0.0170407
570	2022-04-01 13:35:13	7383476	-9.6137e-11	-7.94372e-11	6.0115e-09	-1.23614e-10	2.91132e-10	-6.22968e-11	-1.58874e-13	5.98144e-09	-1.2349e-10	1.01023e-10	-0.010415	-2.65612e-05	-0.0206456	0.0168894
571	2022-04-01 13:35:27	7397520	-9.54168e-11	-8.0246e-11	5.99698e-09	-1.12982e-10	2.9481e-10	-6.18301e-11	-1.60492e-13	5.967e-09	-1.12869e-10	1.02299e-10	-0.010362	-2.68966e-05	-0.0189156	0.0171442
572	2022-04-01 13:35:41	7411563	-1.02554e-10	-7.9601e-11	5.97396e-09	-1.17196e-10	2.82609e-10	-6.6455e-11	-1.59202e-13	5.94409e-09	-1.17079e-10	9.80653e-11	-0.01118	-2.67832e-05	-0.0196967	0.016498
573	2022-04-01 13:35:55	7425606	-1.03404e-10	-7.48608e-11	5.98551e-09	-1.18636e-10	2.82401e-10	-6.70058e-11	-1.49722e-13	5.95558e-09	-1.18517e-10	9.79931e-11	-0.0112509	-2.51397e-05	-0.0199002	0.016454
574	2022-04-01 13:36:09	7439650	-1.02189e-10	-8.02255e-11	5.96998e-09	-1.10778e-10	2.84053e-10	-6.62185e-11	-1.60451e-13	5.94013e-09	-1.10667e-10	9.85664e-11	-0.0111476	-2.70114e-05	-0.0186304	0.0165933
575	2022-04-01 13:36:23	7453693	-9.90288e-11	-7.66115e-11	5.98182e-09	-1.31257e-10	2.86464e-10	-6.41707e-11	-1.53223e-13	5.95191e-09	-1.31126e-10	9.9403e-11	-0.0107815	-2.57435e-05	-0.0220309	0.016701
576	2022-04-01 13:36:37	7467736	-1.01415e-10	-8.30717e-11	5.97488e-09	-1.26484e-10	2.85059e-10	-6.57169e-11	-1.66143e-13	5.94501e-09	-1.26358e-10	9.89155e-11	-0.0110541	-2.79467e-05	-0.0212544	0.0166384
577	2022-04-01 13:36:51	7481780	-9.78463e-11	-6.80115e-11	5.96343e-09	-1.18153e-10	2.80874e-10	-6.34044e-11	-1.36023e-13	5.93361e-09	-1.18035e-10	9.74633e-11	-0.0106856	-2.29241e-05	-0.0198926	0.0164256
578	2022-04-01 13:37:05	7495823	-1.00125e-10	-7.04891e-11	5.97535e-09	-1.14702e-10	2.77196e-10	-6.4881e-11	-1.40978e-13	5.94547e-09	-1.14587e-10	9.6187e-11	-0.0109127	-2.37119e-05	-0.019273	0.0161782
579	2022-04-01 13:37:19	7509866	-1.0593e-10	-7.75534e-11	5.94146e-09	-1.25162e-10	2.73111e-10	-6.86426e-11	-1.55107e-13	5.91175e-09	-1.25037e-10	9.47695e-11	-0.0116112	-2.6237e-05	-0.0211506	0.0160307
580	2022-04-01 13:37:33	7523910	-1.08961e-10	-7.84134e-11	5.94588e-09	-1.31676e-10	2.7136e-10	-7.06067e-11	-1.56827e-13	5.91615e-09	-1.31544e-10	9.41619e-11	-0.0119346	-2.65083e-05	-0.0222348	0.0159161
581	2022-04-01 13:37:47	7537953	-1.15723e-10	-8.4802e-11	5.93188e-09	-1.25086e-10	2.70009e-10	-7.49885e-11	-1.69604e-13	5.90222e-09	-1.24961e-10	9.36931e-11	-0.0127051	-2.87356e-05	-0.0211718	0.0158742
582	2022-04-01 13:38:01	7551996	-9.72981e-11	-6.48582e-11	5.95127e-09	-1.25678e-10	2.70754e-10	-6.30492e-11	-1.29716e-13	5.92151e-09	-1.25552e-10	9.39516e-11	-0.0106475	-2.1906e-05	-0.0212027	0.0158662
583	2022-04-01 13:38:16	7566040	-9.91578e-11	-7.2762e-11	5.92532e-09	-1.19002e-10	2.70116e-10	-6.42543e-11	-1.45524e-13	5.89569e-09	-1.18883e-10	9.37303e-11	-0.0108985	-2.46831e-05	-0.0201644	0.0158981
584	2022-04-01 13:38:30	7580083	-1.01049e-10	-7.7881e-11	5.92185e-09	-1.21464e-10	2.67551e-10	-6.54798e-11	-1.55762e-13	5.89224e-09	-1.21343e-10	9.28402e-11	-0.0111129	-2.64351e-05	-0.0205936	0.0157563
585	2022-04-01 13:38:44	7594126	-1.08048e-10	-8.39317e-11	5.9316e-09	-1.3531e-10	2.57546e-10	-7.00151e-11	-1.67863e-13	5.90194e-09	-1.35175e-10	8.93685e-11	-0.0118631	-2.84421e-05	-0.0229034	0.0151422
586	2022-04-01 13:38:58	7608170	-9.91685e-11	-8.16589e-11	5.55933e-09	-1.26613e-10	2.65379e-10	-6.42612e-11	-1.63318e-13	5.53153e-09	-1.26486e-10	9.20865e-11	-0.0116172	-2.95249e-05	-0.0228664	0.0166476
587	2022-04-01 13:39:12	7622213	-1.00447e-10	-8.57336e-11	5.25678e-09	-1.25624e-10	2.61554e-10	-6.50897e-11	-1.71467e-13	5.2305e-09	-1.25498e-10	9.07592e-11	-0.0124443	-3.27822e-05	-0.0239936	0.0173519
588	2022-04-01 13:39:26	7636256	-1.0765e-10	-8.36349e-11	5.18098e-09	-1.31268e-10	2.57516e-10	-6.97572e-11	-1.6727e-13	5.15508e-09	-1.31137e-10	8.93581e-11	-0.0135318	-3.24476e-05	-0.0254384	0.017334
589	2022-04-01 13:39:40	7650300	-1.10079e-10	-8.20172e-11	5.35173e-09	-1.37288e-10	2.61693e-10	-7.13312e-11	-1.64034e-13	5.32497e-09	-1.37151e-10	9.08075e-11	-0.0133956	-3.08047e-05	-0.0257561	0.0170531
590	2022-04-01 13:39:54	7664343	-9.91793e-11	-7.87512e-11	5.52431e-09	-1.16476e-10	2.5912e-10	-6.42682e-11	-1.57502e-13	5.49669e-09	-1.1636e-10	8.99146e-11	-0.0116922	-2.86541e-05	-0.021169	0.016358
591	2022-04-01 13:40:08	7678386	-1.11681e-10	-8.53139e-11	5.59697e-09	-1.28473e-10	2.62261e-10	-7.23693e-11	-1.70628e-13	5.56899e-09	-1.28345e-10	9.10046e-11	-0.0129951	-3.06389e-05	-0.0230463	0.0163413
592	2022-04-01 13:40:22	7692430	-1.00211e-10	-8.37372e-11	5.71806e-09	-1.25581e-10	2.62737e-10	-6.49367e-11	-1.67474e-13	5.68947e-09	-1.25455e-10	9.11697e-11	-0.0114135	-2.94359e-05	-0.0220505	0.0160243
593	2022-04-01 13:40:36	7706473	-1.08983e-10	-9.39549e-11	4.28476e-08	-1.19883e-10	2.81196e-10	-7.0621e-11	-1.8791e-13	4.26334e-08	-1.19763e-10	9.7575e-11	-0.00165647	-4.40758e-06	-0.00280914	0.0022887
594	2022-04-01 13:40:51	7721026	-1.04371e-10	-9.66267e-11	1.82123e-07	-1.20636e-10	2.64741e-10	-6.76324e-11	-1.93253e-13	1.81212e-07	-1.20515e-10	9.18651e-11	-0.000373222	-1.06645e-06	-0.00066505	0.000506947
595	2022-04-01 13:41:04	7734800	-1.0134e-10	-8.35836e-11	2.60418e-07	-1.03597e-10	2.39394e-10	-6.56683e-11	-1.67167e-13	2.59116e-07	-1.03493e-10	8.30697e-11	-0.000253432	-6.45144e-07	-0.00039941	0.000320589
596	2022-04-01 13:41:18	7748064	-9.98888e-11	-9.24703e-11	3.17483e-07	-1.2227e-10	2.20329e-10	-6.47279e-11	-1.84941e-13	3.15896e-07	-1.22148e-10	7.64542e-11	-0.000204903	-5.85449e-07	-0.000386671	0.000242024
597	2022-04-01 13:41:31	7761327	-1.11455e-10	-9.56333e-11	3.53316e-07	-1.24097e-10	2.07951e-10	-7.22228e-11	-1.91267e-13	3.51549e-07	-1.23973e-10	7.2159e-11	-0.000205441	-5.44067e-07	-0.000352647	0.00020526
598	2022-04-01 13:41:44	7774590	-1.02812e-10	-9.06274e-11	3.77055e-07	-1.14014e-10	1.96456e-10	-6.66222e-11	-1.81255e-13	3.7517e-07	-1.139e-10	6.81702e-11	-0.000177579	-4.83127e-07	-0.000303596	0.000181705
599	2022-04-01 13:41:57	7787853	-1.02726e-10	-9.06991e-11	3.93897e-07	-1.19185e-10	1.87264e-10	-6.65664e-11	-1.81398e-13	3.91928e-07	-1.19066e-10	6.49806e-11	-0.000169844	-4.62836e-07	-0.000303795	0.000165798
600	2022-04-01 13:42:11	7801116	-1.12885e-10	-8.26622e-11	3.96137e-07	-1.02425e-10	1.72752e-10	-7.31495e-11	-1.65324e-13	3.94156e-07	-1.02323e-10	5.99449e-11	-0.000185585	-4.19439e-07	-0.000259599	0.000152084
601	2022-04-01 13:42:24	7814380	-1.04726e-10	-9.61352e-11	3.93718e-07	-1.29515e-10	2.25358e-10	-6.78624e-11	-1.9227e-13	3.91749e-07	-1.29385e-10	7.81992e-11	-0.000173229	-4.90799e-07	-0.000330276	0.000199615
602	2022-04-01 13:42:37	7827643	4.44716e-10	-9.21222e-11	3.85208e-07	-8.73866e-11	1.50139e-09	2.88176e-10	-1.84244e-13	3.83282e-07	-8.72992e-11	5.20982e-10	0.000751864	-4.80702e-07	-0.000227768	0.00135927
603	2022-04-01 13:42:50	7840906	4.1449e-09	-8.40341e-11	3.69262e-07	-3.40989e-11	2.74895e-09	2.6859e-09	-1.68068e-13	3.67416e-07	-3.40648e-11	9.53886e-10	0.00731024	-4.57433e-07	-9.27146e-05	0.0025962
604	2022-04-01 13:43:07	7857420	6.97426e-09	-8.9102e-11	3.6102e-07	4.51499e-12	3.36992e-09	4.51932e-09	-1.78204e-13	3.59215e-07	4.51048e-12	1.16936e-09	0.0125811	-4.96093e-07	1.25565e-05	0.00325533
605	2022-04-01 13:43:18	7868473	8.61555e-09	-8.30206e-11	3.63797e-07	2.63374e-11	3.29084e-09	5.58288e-09	-1.66041e-13	3.61978e-07	2.63111e-11	1.14192e-09	0.0154232	-4.58705e-07	7.26869e-05	0.00315467
606	2022-04-01 13:43:29	7879527	9.90292e-09	-7.36731e-11	3.67828e-07	3.38731e-11	2.99924e-09	6.41709e-09	-1.47346e-13	3.65989e-07	3.38392e-11	1.04074e-09	0.0175336	-4.02597e-07	9.24597e-05	0.00284363
607	2022-04-01 13:43:41	7891620	1.10394e-08	-8.23141e-11	3.69799e-07	3.45074e-11	2.59599e-09	7.15353e-09	-1.64628e-13	3.6795e-07	3.44729e-11	9.00809e-10	0.0194416	-4.4742e-07	9.36891e-05	0.00244818
608	2022-04-01 13:43:52	7902144	1.16387e-08	-6.90046e-11	3.68634e-07	4.18711e-11	2.22301e-09	7.54188e-09	-1.38009e-13	3.66791e-07	4.18292e-11	7.71384e-10	0.0205618	-3.76261e-07	0.000114041	0.00210306
609	2022-04-01 13:44:02	7912667	1.20271e-08	-7.20965e-11	3.66574e-07	2.59182e-11	1.90674e-09	7.79356e-09	-1.44193e-13	3.64741e-07	2.58923e-11	6.61639e-10	0.0213674	-3.9533e-07	7.09881e-05	0.001814
610	2022-04-01 13:44:13	7923190	1.23685e-08	-8.15565e-11	3.66216e-07	2.47679e-11	1.65452e-09	8.01479e-09	-1.63113e-13	3.64385e-07	2.47431e-11	5.74118e-10	0.0219954	-4.47639e-07	6.79038e-05	0.00157558
611	2022-04-01 13:44:23	7933713	1.26083e-08	-7.10931e-11	3.66126e-07	1.98229e-11	1.43687e-09	8.17018e-09	-1.42186e-13	3.64295e-07	1.98031e-11	4.98594e-10	0.0224273	-3.90305e-07	5.43599e-05	0.00136865
612	2022-04-01 13:44:34	7944236	1.28098e-08	-7.82087e-11	3.67201e-07	3.39484e-11	1.27076e-09	8.30075e-09	-1.56417e-13	3.65365e-07	3.39145e-11	4.40954e-10	0.0227191	-4.28113e-07	9.28235e-05	0.00120689
613	2022-04-01 13:44:44	7954760	1.292e-08	-8.10958e-11	3.67559e-07	-5.03099e-12	1.0904e-09	8.37216e-09	-1.62192e-13	3.65721e-07	-5.02596e-12	3.78369e-10	0.0228922	-4.43484e-07	-1.37426e-05	0.00103458
614	2022-04-01 13:44:55	7965283	1.11907e-08	-7.6765e-11	4.03393e-07	-1.18249e-11	8.90721e-10	7.25157e-09	-1.5353e-13	4.01376e-07	-1.18131e-11	3.0908e-10	0.0180668	-3.82509e-07	-2.94314e-05	0.000770051
615	2022-04-01 13:45:06	7976316	7.06135e-09	-8.34096e-11	3.17213e-07	-4.86974e-11	7.14871e-10	4.57575e-09	-1.66819e-13	3.15627e-07	-4.86487e-11	2.4806e-10	0.0144974	-5.28533e-07	-0.000154134	0.000785929
616	2022-04-01 13:45:17	7987370	4.83391e-09	-8.6737e-11	3.07359e-07	-6.75851e-11	6.29234e-10	3.13237e-09	-1.73474e-13	3.05822e-07	-6.75175e-11	2.18344e-10	0.0102425	-5.67238e-07	-0.000220774	0.000713958
617	2022-04-01 13:45:28	7998423	3.47299e-09	-8.85491e-11	3.06733e-07	-8.50216e-11	5.62055e-10	2.2505e-09	-1.77098e-13	3.05199e-07	-8.49366e-11	1.95033e-10	0.00737386	-5.80271e-07	-0.000278299	0.000639035
618	2022-04-01 13:45:39	8009476	2.52335e-09	-7.7881e-11	3.09599e-07	-8.37208e-11	5.11276e-10	1.63513e-09	-1.55762e-13	3.08051e-07	-8.36371e-11	1.77413e-10	0.00530799	-5.05637e-07	-0.000271504	0.00057592
619	2022-04-01 13:45:50	8020529	1.85614e-09	-8.2396e-11	3.19184e-07	-1.00394e-10	4.78543e-10	1.20278e-09	-1.64792e-13	3.17588e-07	-1.00294e-10	1.66054e-10	0.00378723	-5.18886e-07	-0.000315798	0.000522861
620	2022-04-01 13:46:01	8031582	1.38929e-09	-8.37577e-11	3.29755e-07	-9.48363e-11	4.47759e-10	9.0026e-10	-1.67515e-13	3.28106e-07	-9.47415e-11	1.55372e-10	0.00274381	-5.10552e-07	-0.000288752	0.000473543
621	2022-04-01 13:46:12	8042636	1.0272e-09	-8.69417e-11	3.39788e-07	-1.10778e-10	4.10196e-10	6.65626e-10	-1.73883e-13	3.38089e-07	-1.10667e-10	1.42338e-10	0.00196879	-5.14312e-07	-0.000327332	0.000421007
622	2022-04-01 13:46:24	8054730	7.11079e-10	-8.48634e-11	3.47493e-07	-1.0736e-10	3.84027e-10	4.60779e-10	-1.69727e-13	3.45756e-07	-1.07253e-10	1.33257e-10	0.00133267	-4.90887e-07	-0.000310198	0.000385409
623	2022-04-01 13:46:37	8067993	4.76202e-10	-8.75663e-11	3.51166e-07	-9.59973e-11	3.59879e-10	3.08579e-10	-1.75133e-13	3.4941e-07	-9.59013e-11	1.24878e-10	0.000883142	-5.01224e-07	-0.000274466	0.000357397
624	2022-04-01 13:46:51	8081256	3.34302e-10	-8.83955e-11	3.47583e-07	-1.09026e-10	3.71089e-10	2.16628e-10	-1.76791e-13	3.45845e-07	-1.08917e-10	1.28768e-10	0.000626372	-5.11186e-07	-0.00031493	0.000372328
625	2022-04-01 13:47:04	8094519	2.09861e-10	-9.04227e-11	2.70183e-07	-1.15293e-10	5.04066e-10	1.3599e-10	-1.80845e-13	2.68832e-07	-1.15178e-10	1.74911e-10	0.000505855	-6.72708e-07	-0.000428437	0.000650633
626	2022-04-01 13:47:17	8107782	9.33313e-11	-8.48122e-11	1.75493e-07	-1.04489e-10	6.10184e-10	6.04787e-11	-1.69624e-13	1.74616e-07	-1.04385e-10	2.11734e-10	0.000346353	-9.71416e-07	-0.000597796	0.00121257
627	2022-04-01 13:47:31	8121045	2.81219e-11	-8.75253e-11	1.10993e-07	-1.19873e-10	6.70154e-10	1.8223e-11	-1.75051e-13	1.10438e-07	-1.19753e-10	2.32543e-10	0.000165006	-1.58506e-06	-0.00108435	0.00210565
628	2022-04-01 13:47:44	8134309	-3.71949e-12	-8.14131e-11	6.8947e-08	-1.08768e-10	6.76749e-10	-2.41023e-12	-1.62826e-13	6.86023e-08	-1.08659e-10	2.34832e-10	-3.51334e-05	-2.37348e-06	-0.0015839	0.00342309
629	2022-04-01 13:47:58	8148082	-4.18066e-11	-8.50477e-11	4.45188e-08	-1.15992e-10	6.57999e-10	-2.70907e-11	-1.70095e-13	4.42962e-08	-1.15876e-10	2.28326e-10	-0.00061158	-3.83995e-06	-0.00261594	0.00515452
630	2022-04-01 13:48:11	8161596	-5.10516e-11	-8.27544e-11	2.97511e-08	-1.10703e-10	6.44315e-10	-3.30814e-11	-1.65509e-13	2.96023e-08	-1.10592e-10	2.23577e-10	-0.00111753	-5.59107e-06	-0.00373593	0.00755269
631	2022-04-01 13:48:25	8175109	-6.90041e-11	-8.4413e-11	2.07564e-08	-1.25086e-10	6.19191e-10	-4.47147e-11	-1.68826e-13	2.06526e-08	-1.24961e-10	2.14859e-10	-0.00216508	-8.17456e-06	-0.00605061	0.0104035
632	2022-04-01 13:48:38	8188622	-7.37233e-11	-8.60817e-11	1.53948e-08	-1.1425e-10	5.96808e-10	-4.77727e-11	-1.72163e-13	1.53178e-08	-1.14136e-10	2.07092e-10	-0.00311876	-1.12394e-05	-0.00745117	0.0135197
633	2022-04-01 13:48:52	8202135	-7.18313e-11	-8.33584e-11	1.19604e-08	-1.2858e-10	5.71676e-10	-4.65467e-11	-1.66717e-13	1.19006e-08	-1.28451e-10	1.98372e-10	-0.00391129	-1.40091e-05	-0.0107937	0.016669
634	2022-04-01 13:49:05	8215649	-7.51853e-11	-8.08706e-11	9.90342e-09	-1.14508e-10	5.41139e-10	-4.87201e-11	-1.61741e-13	9.8539e-09	-1.14393e-10	1.87775e-10	-0.00494424	-1.64139e-05	-0.011609	0.0190559
635	2022-04-01 13:49:19	8229162	-8.95903e-11	-7.27927e-11	8.647e-09	-1.18991e-10	5.21711e-10	-5.80545e-11	-1.45585e-13	8.60377e-09	-1.18872e-10	1.81034e-10	-0.00674757	-1.69211e-05	-0.0138163	0.0210412
636	2022-04-01 13:49:32	8242675	-7.14873e-11	-7.75022e-11	7.88162e-09	-1.1582e-10	4.98292e-10	-4.63238e-11	-1.55004e-13	7.84221e-09	-1.15704e-10	1.72907e-10	-0.00590698	-1.97654e-05	-0.014754	0.0220483
637	2022-04-01 13:49:46	8256189	-8.54193e-11	-8.53549e-11	7.27713e-09	-1.2026e-10	4.8434e-10	-5.53517e-11	-1.7071e-13	7.24074e-09	-1.2014e-10	1.68066e-10	-0.00764448	-2.35763e-05	-0.0165922	0.0232111
638	2022-04-01 13:50:00	8270743	-7.80341e-11	-6.98953e-11	6.94064e-09	-1.15626e-10	4.61297e-10	-5.05661e-11	-1.39791e-13	6.90594e-09	-1.1551e-10	1.6007e-10	-0.00732212	-2.02421e-05	-0.0167262	0.0231786
639	2022-04-01 13:50:14	8284786	-8.85583e-11	-8.15155e-11	6.73365e-09	-1.28688e-10	4.43022e-10	-5.73858e-11	-1.63031e-13	6.69998e-09	-1.28559e-10	1.53729e-10	-0.00856506	-2.43331e-05	-0.019188	0.0229446
640	2022-04-01 13:50:28	8298829	-8.23663e-11	-8.04098e-11	6.58778e-09	-1.164e-10	4.3059e-10	-5.33734e-11	-1.6082e-13	6.55484e-09	-1.16284e-10	1.49415e-10	-0.00814259	-2.45345e-05	-0.0177401	0.0227946
641	2022-04-01 13:50:42	8312872	-1.00813e-10	-7.87206e-11	6.48409e-09	-1.23538e-10	4.21844e-10	-6.53268e-11	-1.57441e-13	6.45167e-09	-1.23414e-10	1.4638e-10	-0.0101256	-2.44032e-05	-0.0191291	0.0226887
642	2022-04-01 13:50:56	8326916	-9.27078e-11	-8.05839e-11	6.40437e-09	-1.16207e-10	4.08783e-10	-6.00747e-11	-1.61168e-13	6.37235e-09	-1.16091e-10	1.41848e-10	-0.0094274	-2.52917e-05	-0.0182179	0.0222599
643	2022-04-01 13:51:10	8340959	-8.88701e-11	-7.05812e-11	6.37235e-09	-1.24484e-10	3.95084e-10	-5.75878e-11	-1.41162e-13	6.34049e-09	-1.2436e-10	1.37094e-10	-0.00908255	-2.22636e-05	-0.0196136	0.021622
644	2022-04-01 13:51:25	8355002	-9.49868e-11	-9.04125e-11	6.31614e-09	-1.19711e-10	3.86631e-10	-6.15514e-11	-1.80825e-13	6.28456e-09	-1.19591e-10	1.34161e-10	-0.00979408	-2.87729e-05	-0.0190294	0.0213477
645	2022-04-01 13:51:39	8369046	-1.03328e-10	-8.42696e-11	6.26419e-09	-1.2614e-10	3.70974e-10	-6.69565e-11	-1.68539e-13	6.23287e-09	-1.26014e-10	1.28728e-10	-0.0107425	-2.70404e-05	-0.0202176	0.0206531
646	2022-04-01 13:51:53	8383089	-1.065e-10	-8.97572e-11	6.23073e-09	-1.27838e-10	3.69284e-10	-6.9012e-11	-1.79514e-13	6.19958e-09	-1.2771e-10	1.28142e-10	-0.0111317	-2.89559e-05	-0.0205998	0.0206694
647	2022-04-01 13:52:07	8397132	-9.32023e-11	-7.7963e-11	6.20918e-09	-1.19013e-10	3.58381e-10	-6.03951e-11	-1.55926e-13	6.17813e-09	-1.18894e-10	1.24358e-10	-0.00977562	-2.52384e-05	-0.0192443	0.0201288
648	2022-04-01 13:52:21	8411176	-9.38258e-11	-8.35734e-11	6.18341e-09	-1.23775e-10	3.49758e-10	-6.07991e-11	-1.67147e-13	6.15249e-09	-1.23651e-10	1.21366e-10	-0.00988203	-2.71673e-05	-0.0200977	0.0197263
649	2022-04-01 13:52:35	8425219	-8.86121e-11	-7.16153e-11	6.17464e-09	-1.19045e-10	3.55747e-10	-5.74206e-11	-1.43231e-13	6.14377e-09	-1.18926e-10	1.23444e-10	-0.00934616	-2.33132e-05	-0.0193572	0.0200926
650	2022-04-01 13:52:49	8439262	-9.87493e-11	-8.08603e-11	6.16434e-09	-1.16615e-10	3.41119e-10	-6.39895e-11	-1.61721e-13	6.13352e-09	-1.16498e-10	1.18368e-10	-0.0104328	-2.63667e-05	-0.0189937	0.0192986
651	2022-04-01 13:53:03	8453305	-9.62553e-11	-7.62225e-11	6.13293e-09	-1.08435e-10	3.36151e-10	-6.23734e-11	-1.52445e-13	6.10227e-09	-1.08327e-10	1.16644e-10	-0.0102214	-2.49817e-05	-0.0177519	0.0191149
652	2022-04-01 13:53:17	8467349	-8.91281e-11	-7.56491e-11	6.13e-09	-1.1596e-10	3.24964e-10	-5.7755e-11	-1.51298e-13	6.09935e-09	-1.15844e-10	1.12763e-10	-0.00946904	-2.48056e-05	-0.0189929	0.0184876
653	2022-04-01 13:53:31	8481392	-9.17833e-11	-8.61636e-11	6.10233e-09	-1.2241e-10	3.23996e-10	-5.94756e-11	-1.72327e-13	6.07182e-09	-1.22288e-10	1.12427e-10	-0.00979535	-2.83815e-05	-0.0201402	0.0185161
654	2022-04-01 13:53:45	8495436	-1.02135e-10	-8.04303e-11	6.10256e-09	-1.24302e-10	3.19689e-10	-6.61835e-11	-1.60861e-13	6.07205e-09	-1.24178e-10	1.10932e-10	-0.0108997	-2.6492e-05	-0.0204507	0.0182693
655	2022-04-01 13:53:59	8509479	-8.00336e-11	-8.3297e-11	6.07015e-09	-1.15863e-10	3.08494e-10	-5.18618e-11	-1.66594e-13	6.0398e-09	-1.15747e-10	1.07047e-10	-0.00858667	-2.75827e-05	-0.0191641	0.0177237
656	2022-04-01 13:54:13	8523522	-9.64381e-11	-7.2547e-11	6.05287e-09	-1.2915e-10	3.09569e-10	-6.24919e-11	-1.45094e-13	6.02261e-09	-1.29021e-10	1.0742e-10	-0.0103762	-2.40916e-05	-0.0214228	0.0178362
657	2022-04-01 13:54:27	8537565	-1.05392e-10	-7.99696e-11	6.03463e-09	-1.25194e-10	3.03894e-10	-6.8294e-11	-1.59939e-13	6.00446e-09	-1.25069e-10	1.05451e-10	-0.0113739	-2.66367e-05	-0.0208293	0.0175622
658	2022-04-01 13:54:41	8551609	-9.38581e-11	-7.74101e-11	6.03738e-09	-1.2614e-10	3.04232e-10	-6.082e-11	-1.5482e-13	6.00719e-09	-1.26014e-10	1.05569e-10	-0.0101245	-2.57725e-05	-0.0209772	0.0175737
659	2022-04-01 13:54:55	8565652	-1.04898e-10	-8.03382e-11	6.04792e-09	-1.174e-10	2.92307e-10	-6.79739e-11	-1.60676e-13	6.01768e-09	-1.17283e-10	1.01431e-10	-0.0112957	-2.67007e-05	-0.0194897	0.0168554
660	2022-04-01 13:55:09	8579695	-1.08037e-10	-7.90277e-11	6.02361e-09	-1.26161e-10	2.90595e-10	-7.0008e-11	-1.58055e-13	5.99349e-09	-1.26035e-10	1.00836e-10	-0.0116807	-2.63712e-05	-0.0210286	0.0168243
661	2022-04-01 13:55:23	8593738	-9.11598e-11	-7.7195e-11	6.03575e-09	-1.2184e-10	2.94096e-10	-5.90716e-11	-1.5439e-13	6.00557e-09	-1.21718e-10	1.02051e-10	-0.00983613	-2.57078e-05	-0.0202675	0.0169928
662	2022-04-01 13:55:37	8607782	-1.11541e-10	-7.96727e-11	6.00787e-09	-1.23743e-10	2.92936e-10	-7.22786e-11	-1.59345e-13	5.97783e-09	-1.23619e-10	1.01649e-10	-0.0120911	-2.66561e-05	-0.0206796	0.0170043
663	2022-04-01 13:55:51	8621825	-9.84375e-11	-8.16691e-11	6.01482e-09	-1.23775e-10	2.82264e-10	-6.37875e-11	-1.63338e-13	5.98475e-09	-1.23651e-10	9.79456e-11	-0.0106583	-2.72924e-05	-0.0206611	0.0163659
664	2022-04-01 13:56:05	8635868	-1.04145e-10	-8.5232e-11	5.99729e-09	-1.34052e-10	2.97582e-10	-6.7486e-11	-1.70464e-13	5.9673e-09	-1.33918e-10	1.03261e-10	-0.0113093	-2.85663e-05	-0.022442	0.0173045
665	2022-04-01 13:56:19	8649912	-1.1195e-10	-8.46893e-11	5.99798e-09	-1.15207e-10	2.83239e-10	-7.25436e-11	-1.69379e-13	5.96799e-09	-1.15092e-10	9.82839e-11	-0.0121554	-2.83812e-05	-0.0192848	0.0164685
666	2022-04-01 13:56:33	8663955	-9.46858e-11	-8.38191e-11	5.98316e-09	-1.3101e-10	2.78762e-10	-6.13564e-11	-1.67638e-13	5.95324e-09	-1.30879e-10	9.67304e-11	-0.0103064	-2.81591e-05	-0.0219845	0.0162484
667	2022-04-01 13:56:47	8677998	-1.00447e-10	-7.28644e-11	5.97107e-09	-1.12627e-10	2.73756e-10	-6.50897e-11	-1.45729e-13	5.94121e-09	-1.12514e-10	9.49933e-11	-0.0109556	-2.45285e-05	-0.0189379	0.0159889
668	2022-04-01 13:57:02	8692042	-9.86096e-11	-8.9276e-11	5.98901e-09	-1.25387e-10	2.72112e-10	-6.3899e-11	-1.78552e-13	5.95906e-09	-1.25262e-10	9.44229e-11	-0.010723	-2.99631e-05	-0.0210203	0.0158452
669	2022-04-01 13:57:16	8706085	-1.08392e-10	-8.07579e-11	5.96148e-09	-1.20399e-10	2.79653e-10	-7.0238e-11	-1.61516e-13	5.93167e-09	-1.20279e-10	9.70396e-11	-0.0118412	-2.72294e-05	-0.0202773	0.0163596
670	2022-04-01 13:57:30	8720128	-9.99963e-11	-8.45153e-11	5.96539e-09	-1.28053e-10	2.75099e-10	-6.47976e-11	-1.69031e-13	5.93556e-09	-1.27925e-10	9.54594e-11	-0.0109168	-2.84776e-05	-0.0215523	0.0160826
671	2022-04-01 13:57:44	8734172	-1.07456e-10	-8.43925e-11	5.9534e-09	-1.2141e-10	2.70101e-10	-6.96315e-11	-1.68785e-13	5.92363e-09	-1.21289e-10	9.3725e-11	-0.0117549	-2.84935e-05	-0.0204754	0.0158222
672	2022-04-01 13:57:58	8748215	-1.09305e-10	-8.42184e-11	5.98005e-09	-1.30977e-10	2.67382e-10	-7.08296e-11	-1.68437e-13	5.95015e-09	-1.30846e-10	9.27816e-11	-0.0119038	-2.8308e-05	-0.0219904	0.0155931
673	2022-04-01 13:58:12	8762258	-9.66853e-11	-7.35298e-11	5.96339e-09	-1.23388e-10	2.60786e-10	-6.26521e-11	-1.4706e-13	5.93357e-09	-1.23265e-10	9.04927e-11	-0.0105589	-2.47843e-05	-0.0207741	0.015251
674	2022-04-01 13:58:26	8776302	-1.16099e-10	-8.41468e-11	5.95619e-09	-1.28473e-10	2.6329e-10	-7.52322e-11	-1.68294e-13	5.92641e-09	-1.28345e-10	9.13616e-11	-0.0126944	-2.83972e-05	-0.0216564	0.015416
675	2022-04-01 13:58:40	8790345	-1.10004e-10	-8.39625e-11	5.95563e-09	-1.2413e-10	2.70324e-10	-7.12826e-11	-1.67925e-13	5.92585e-09	-1.24006e-10	9.38024e-11	-0.0120291	-2.83377e-05	-0.0209263	0.0158294
676	2022-04-01 13:58:54	8804388	-1.03006e-10	-8.27646e-11	5.92768e-09	-1.25817e-10	2.59865e-10	-6.67479e-11	-1.65529e-13	5.89804e-09	-1.25691e-10	9.01732e-11	-0.011317	-2.80651e-05	-0.0213107	0.0152887
677	2022-04-01 13:59:08	8818432	-1.10585e-10	-8.4331e-11	5.93238e-09	-1.33278e-10	2.53454e-10	-7.16591e-11	-1.68662e-13	5.90272e-09	-1.33145e-10	8.79485e-11	-0.01214	-2.85736e-05	-0.0225565	0.0148997
678	2022-04-01 13:59:22	8832475	-1.18271e-10	-8.93477e-11	5.9275e-09	-1.19722e-10	2.50958e-10	-7.66396e-11	-1.78695e-13	5.89786e-09	-1.19602e-10	8.70824e-11	-0.0129945	-3.02983e-05	-0.0202789	0.0147651
679	2022-04-01 13:59:36	8846518	-1.11219e-10	-9.2757e-11	5.93934e-09	-1.2442e-10	2.55895e-10	-7.20699e-11	-1.85514e-13	5.90964e-09	-1.24296e-10	8.87956e-11	-0.0121953	-3.13917e-05	-0.0210327	0.0150255
680	2022-04-01 13:59:50	8860561	-1.05382e-10	-7.89765e-11	6.41763e-09	-1.23786e-10	2.56241e-10	-6.82875e-11	-1.57953e-13	6.38554e-09	-1.23662e-10	8.89156e-11	-0.0106941	-2.4736e-05	-0.019366	0.0139245
681	2022-04-01 14:00:04	8874605	-1.02393e-10	-7.9253e-11	5.34212e-09	-1.27398e-10	2.56379e-10	-6.63507e-11	-1.58506e-13	5.31541e-09	-1.27271e-10	8.89635e-11	-0.0124827	-2.98201e-05	-0.0239437	0.0167369
682	2022-04-01 14:00:18	8888648	-9.9233e-11	-8.30615e-11	5.18898e-09	-1.26882e-10	2.54298e-10	-6.4303e-11	-1.66123e-13	5.16304e-09	-1.26755e-10	8.82414e-11	-0.0124545	-3.21755e-05	-0.0245505	0.017091
683	2022-04-01 14:00:32	8902691	-1.02791e-10	-8.2785e-11	5.22504e-09	-1.23538e-10	2.55227e-10	-6.66086e-11	-1.6557e-13	5.19891e-09	-1.23414e-10	8.85638e-11	-0.012812	-3.1847e-05	-0.0237385	0.017035
684	2022-04-01 14:00:46	8916735	-1.01211e-10	-8.4372e-11	5.41897e-09	-1.29634e-10	2.5396e-10	-6.55847e-11	-1.68744e-13	5.39188e-09	-1.29504e-10	8.81241e-11	-0.0121636	-3.1296e-05	-0.0240184	0.0163439
685	2022-04-01 14:01:00	8930778	-1.02694e-10	-7.41441e-11	5.53682e-09	-1.12788e-10	2.61493e-10	-6.65457e-11	-1.48288e-13	5.50914e-09	-1.12675e-10	9.07381e-11	-0.0120792	-2.69168e-05	-0.0204524	0.0164705
686	2022-04-01 14:01:14	8944821	-1.04242e-10	-7.73589e-11	5.62739e-09	-1.22678e-10	2.52946e-10	-6.75488e-11	-1.54718e-13	5.59925e-09	-1.22555e-10	8.77723e-11	-0.0120639	-2.76319e-05	-0.0218878	0.0156757
687	2022-04-01 14:01:28	8958865	-9.61908e-11	-7.49836e-11	1.05002e-08	-1.23538e-10	2.67175e-10	-6.23316e-11	-1.49967e-13	1.04477e-08	-1.23414e-10	9.27097e-11	-0.00596606	-1.43541e-05	-0.0118126	0.0088737
688	2022-04-01 14:01:43	8973418	-1.10789e-10	-7.98877e-11	8.87767e-08	-1.22506e-10	2.80221e-10	-7.17913e-11	-1.59775e-13	8.83328e-08	-1.22383e-10	9.72367e-11	-0.000812736	-1.80879e-06	-0.00138548	0.0011008
689	2022-04-01 14:01:57	8987192	-1.08521e-10	-8.9143e-11	2.14014e-07	-1.22463e-10	2.46934e-10	-7.03216e-11	-1.78286e-13	2.12944e-07	-1.22341e-10	8.56861e-11	-0.000330235	-8.37244e-07	-0.00057452	0.000402388
690	2022-04-01 14:02:10	9000456	-1.17336e-10	-9.48046e-11	2.80037e-07	-1.18217e-10	2.13771e-10	-7.60337e-11	-1.89609e-13	2.78637e-07	-1.18099e-10	7.41785e-11	-0.000272878	-6.80489e-07	-0.000423845	0.000266219
691	2022-04-01 14:02:23	9013719	-1.14369e-10	-9.96981e-11	3.21872e-07	-1.11617e-10	2.18232e-10	-7.41111e-11	-1.99396e-13	3.20263e-07	-1.11505e-10	7.57265e-11	-0.000231407	-6.22602e-07	-0.000348169	0.000236451
692	2022-04-01 14:02:36	9026982	-1.20238e-10	-8.55187e-11	3.58333e-07	-1.19185e-10	1.92516e-10	-7.79142e-11	-1.71037e-13	3.56541e-07	-1.19066e-10	6.68031e-11	-0.000218528	-4.79713e-07	-0.000333947	0.000187364
693	2022-04-01 14:02:50	9040245	-1.12079e-10	-8.56825e-11	3.82699e-07	-1.14777e-10	1.86144e-10	-7.26272e-11	-1.71365e-13	3.80786e-07	-1.14662e-10	6.4592e-11	-0.00019073	-4.5003e-07	-0.00030112	0.000169628
694	2022-04-01 14:03:03	9053508	-1.18669e-10	-1.00056e-10	3.95509e-07	-1.20432e-10	1.73581e-10	-7.68975e-11	-2.00112e-13	3.93531e-07	-1.20312e-10	6.02326e-11	-0.000195404	-5.08503e-07	-0.000305723	0.000153057
695	2022-04-01 14:03:16	9066772	-1.18368e-10	-9.61248e-11	4.03841e-07	-1.17787e-10	1.66747e-10	-7.67025e-11	-1.9225e-13	4.01822e-07	-1.17669e-10	5.78612e-11	-0.000190887	-4.78445e-07	-0.000292839	0.000143997
696	2022-04-01 14:03:30	9080035	-1.01329e-10	-9.52346e-11	4.09216e-07	-1.18034e-10	5.47089e-10	-6.56612e-11	-1.90469e-13	4.0717e-07	-1.17916e-10	1.8984e-10	-0.000161262	-4.67788e-07	-0.000289599	0.000466242
697	2022-04-01 14:03:43	9093298	1.73089e-09	-9.54695e-11	3.9103e-07	-7.03156e-11	2.20831e-09	1.12162e-09	-1.90939e-13	3.89075e-07	-7.02453e-11	7.66284e-10	0.00288278	-4.90751e-07	-0.000180544	0.0019695
698	2022-04-01 14:03:59	9109812	5.43271e-09	-8.96855e-11	3.55645e-07	-2.42734e-11	3.13713e-09	3.5204e-09	-1.79371e-13	3.53867e-07	-2.42491e-11	1.08858e-09	0.00994837	-5.06889e-07	-6.85261e-05	0.00307625
699	2022-04-01 14:04:10	9120865	7.54228e-09	-9.07606e-11	3.61826e-07	2.37252e-11	3.34589e-09	4.8874e-09	-1.81521e-13	3.60017e-07	2.37015e-11	1.16102e-09	0.0135755	-5.04202e-07	6.58343e-05	0.00322492
700	2022-04-01 14:04:21	9131919	9.07624e-09	-8.26315e-11	3.65409e-07	1.80277e-11	3.19196e-09	5.8814e-09	-1.65263e-13	3.63582e-07	1.80097e-11	1.10761e-09	0.0161763	-4.54541e-07	4.9534e-05	0.00304638
701	2022-04-01 14:04:34	9144013	1.04039e-08	-8.38498e-11	3.69441e-07	2.96269e-11	2.82562e-09	6.74173e-09	-1.677e-13	3.67594e-07	2.95973e-11	9.8049e-10	0.0183402	-4.56209e-07	8.05162e-05	0.00266732
702	2022-04-01 14:04:44	9154536	1.12639e-08	-8.14644e-11	3.69083e-07	2.50367e-11	2.45112e-09	7.29901e-09	-1.62929e-13	3.67238e-07	2.50117e-11	8.50539e-10	0.0198754	-4.4366e-07	6.81076e-05	0.00231604
703	2022-04-01 14:04:55	9165059	1.17839e-08	-8.0205e-11	3.68008e-07	2.49077e-11	2.09663e-09	7.63597e-09	-1.6041e-13	3.66168e-07	2.48828e-11	7.27531e-10	0.0208537	-4.38078e-07	6.79546e-05	0.00198688
704	2022-04-01 14:05:05	9175582	1.20943e-08	-9.17127e-11	3.6738e-07	2.62514e-11	1.80012e-09	7.83711e-09	-1.83425e-13	3.65543e-07	2.62251e-11	6.24642e-10	0.0214396	-5.01789e-07	7.1743e-05	0.0017088
705	2022-04-01 14:05:16	9186105	1.24793e-08	-8.19455e-11	3.66484e-07	1.46307e-11	1.55796e-09	8.08659e-09	-1.63891e-13	3.64652e-07	1.46161e-11	5.40612e-10	0.0221762	-4.49445e-07	4.00823e-05	0.00148254
706	2022-04-01 14:05:26	9196628	1.26399e-08	-7.81472e-11	3.6532e-07	9.06223e-12	1.35899e-09	8.19066e-09	-1.56294e-13	3.63493e-07	9.05317e-12	4.7157e-10	0.0225332	-4.29979e-07	2.4906e-05	0.00129733
707	2022-04-01 14:05:37	9207151	1.28005e-08	-7.26698e-11	3.65499e-07	5.02024e-12	1.19289e-09	8.29472e-09	-1.4534e-13	3.63672e-07	5.01522e-12	4.13933e-10	0.0228083	-3.99645e-07	1.37905e-05	0.00113821
708	2022-04-01 14:05:47	9217675	1.25156e-08	-8.13927e-11	3.68366e-07	-4.64399e-12	1.07523e-09	8.11011e-09	-1.62785e-13	3.66524e-07	-4.63935e-12	3.73105e-10	0.0221271	-4.44133e-07	-1.26577e-05	0.00101795
709	2022-04-01 14:05:58	9228198	1.11671e-08	-7.48812e-11	3.6532e-07	-3.18844e-11	8.11393e-10	7.23628e-09	-1.49762e-13	3.63493e-07	-3.18525e-11	2.81553e-10	0.0199076	-4.12009e-07	-8.76289e-05	0.000774576
710	2022-04-01 14:06:09	9239231	6.26411e-09	-8.42901e-11	3.13003e-07	-6.30271e-11	6.80128e-10	4.05914e-09	-1.6858e-13	3.11438e-07	-6.29641e-11	2.36004e-10	0.0130336	-5.41296e-07	-0.000202172	0.000757789
711	2022-04-01 14:06:20	9250285	4.35118e-09	-8.83546e-11	3.0727e-07	-5.55989e-11	5.93437e-10	2.81956e-09	-1.76709e-13	3.05734e-07	-5.55433e-11	2.05923e-10	0.00922229	-5.77984e-07	-0.000181672	0.000673536
712	2022-04-01 14:06:31	9261338	3.10579e-09	-7.86079e-11	3.05657e-07	-8.42368e-11	5.38113e-10	2.01255e-09	-1.57216e-13	3.04129e-07	-8.41526e-11	1.86725e-10	0.00661743	-5.16938e-07	-0.0002767	0.000613968
713	2022-04-01 14:06:42	9272391	2.26965e-09	-9.21427e-11	3.11391e-07	-1.00103e-10	4.89216e-10	1.47073e-09	-1.84285e-13	3.09834e-07	-1.00003e-10	1.69758e-10	0.00474684	-5.94787e-07	-0.000322763	0.0005479
714	2022-04-01 14:06:53	9283444	1.69578e-09	-8.23039e-11	3.22499e-07	-9.30841e-11	4.50409e-10	1.09887e-09	-1.64608e-13	3.20887e-07	-9.2991e-11	1.56292e-10	0.00342447	-5.12978e-07	-0.000289794	0.000487063
715	2022-04-01 14:07:04	9294498	1.29523e-09	-8.7126e-11	3.32712e-07	-1.05156e-10	4.25346e-10	8.39309e-10	-1.74252e-13	3.31048e-07	-1.05051e-10	1.47595e-10	0.00253531	-5.26364e-07	-0.000317328	0.000445841
716	2022-04-01 14:07:15	9305551	9.21434e-10	-9.48865e-11	3.41401e-07	-9.94588e-11	4.02226e-10	5.97089e-10	-1.89773e-13	3.39694e-07	-9.93593e-11	1.39572e-10	0.00175773	-5.58659e-07	-0.000292497	0.000410877
717	2022-04-01 14:07:27	9317645	6.33088e-10	-8.47406e-11	3.48388e-07	-9.78463e-11	3.65821e-10	4.10241e-10	-1.69481e-13	3.46646e-07	-9.77485e-11	1.2694e-10	0.00118346	-4.88917e-07	-0.000281983	0.000366195
718	2022-04-01 14:07:40	9330908	4.40158e-10	-9.26546e-11	3.51883e-07	-1.1424e-10	3.41289e-10	2.85222e-10	-1.85309e-13	3.50124e-07	-1.14126e-10	1.18427e-10	0.000814633	-5.29268e-07	-0.000325959	0.000338244
719	2022-04-01 14:07:54	9344171	2.99881e-10	-9.09141e-11	3.39609e-07	-1.13842e-10	3.88949e-10	1.94323e-10	-1.81828e-13	3.37911e-07	-1.13728e-10	1.34965e-10	0.000575071	-5.38095e-07	-0.000336563	0.000399411
720	2022-04-01 14:08:07	9357435	1.60067e-10	-9.13236e-11	2.46802e-07	-1.18916e-10	5.29966e-10	1.03723e-10	-1.82647e-13	2.45568e-07	-1.18797e-10	1.83898e-10	0.000422382	-7.43774e-07	-0.000483765	0.000748869
721	2022-04-01 14:08:20	9370698	8.05711e-11	-9.49684e-11	1.58473e-07	-1.20045e-10	6.23506e-10	5.22101e-11	-1.89937e-13	1.57681e-07	-1.19925e-10	2.16357e-10	0.000331113	-1.20457e-06	-0.000760556	0.00137212
722	2022-04-01 14:08:33	9383961	1.75332e-11	-9.16512e-11	9.96158e-08	-1.17174e-10	6.6107e-10	1.13615e-11	-1.83302e-13	9.91177e-08	-1.17057e-10	2.29391e-10	0.000114626	-1.84934e-06	-0.00118099	0.00231433
723	2022-04-01 14:08:47	9397224	-2.18332e-11	-9.1252e-11	6.22877e-08	-1.09563e-10	6.65178e-10	-1.41479e-11	-1.82504e-13	6.19763e-08	-1.09453e-10	2.30817e-10	-0.00022828	-2.94474e-06	-0.00176605	0.00372428
724	2022-04-01 14:09:00	9410998	-4.34299e-11	-8.72387e-11	4.04982e-08	-1.18572e-10	6.56501e-10	-2.81426e-11	-1.74477e-13	4.02957e-08	-1.18453e-10	2.27806e-10	-0.000698401	-4.32993e-06	-0.0029396	0.00565335
725	2022-04-01 14:09:14	9424511	-5.67169e-11	-8.27953e-11	2.72595e-08	-1.22506e-10	6.29688e-10	-3.67526e-11	-1.65591e-13	2.71232e-08	-1.22383e-10	2.18502e-10	-0.00135502	-6.10513e-06	-0.00451213	0.0080559
726	2022-04-01 14:09:28	9438025	-6.04364e-11	-8.29693e-11	1.92754e-08	-1.20217e-10	6.15029e-10	-3.91628e-11	-1.65939e-13	1.9179e-08	-1.20097e-10	2.13415e-10	-0.00204196	-8.65209e-06	-0.00626188	0.0111275
727	2022-04-01 14:09:41	9451538	-8.10441e-11	-8.14746e-11	1.442e-08	-1.25968e-10	5.83939e-10	-5.25166e-11	-1.62949e-13	1.43479e-08	-1.25842e-10	2.02627e-10	-0.00366023	-1.1357e-05	-0.00877076	0.0141224
728	2022-04-01 14:09:55	9465051	-8.72146e-11	-8.0676e-11	1.14094e-08	-1.19636e-10	5.60719e-10	-5.65151e-11	-1.61352e-13	1.13524e-08	-1.19516e-10	1.94569e-10	-0.00497827	-1.42131e-05	-0.0105279	0.0171391
729	2022-04-01 14:10:08	9478565	-1.01727e-10	-8.14746e-11	9.59817e-09	-1.24388e-10	5.24637e-10	-6.59191e-11	-1.62949e-13	9.55018e-09	-1.24264e-10	1.82049e-10	-0.00690239	-1.70624e-05	-0.0130117	0.0190624
730	2022-04-01 14:10:22	9492078	-9.71798e-11	-8.67165e-11	8.41067e-09	-1.35041e-10	5.11684e-10	-6.29725e-11	-1.73433e-13	8.36862e-09	-1.34906e-10	1.77554e-10	-0.00752484	-2.07242e-05	-0.0161205	0.0212167
731	2022-04-01 14:10:35	9505591	-8.38176e-11	-9.63505e-11	7.72207e-09	-1.33504e-10	4.89062e-10	-5.43138e-11	-1.92701e-13	7.68346e-09	-1.3337e-10	1.69705e-10	-0.00706893	-2.508e-05	-0.0173581	0.022087
732	2022-04-01 14:10:49	9519105	-9.62231e-11	-8.0113e-11	7.19211e-09	-1.20819e-10	4.67647e-10	-6.23526e-11	-1.60226e-13	7.15615e-09	-1.20698e-10	1.62274e-10	-0.00871315	-2.239e-05	-0.0168664	0.0226761
733	2022-04-01 14:11:03	9533658	-9.40408e-11	-8.79041e-11	6.88943e-09	-1.23882e-10	4.50601e-10	-6.09384e-11	-1.75808e-13	6.85498e-09	-1.23758e-10	1.56359e-10	-0.00888966	-2.56468e-05	-0.0180537	0.0228095
734	2022-04-01 14:11:17	9547701	-9.40086e-11	-8.5273e-11	6.67836e-09	-1.25936e-10	4.38146e-10	-6.09176e-11	-1.70546e-13	6.64497e-09	-1.2581e-10	1.52037e-10	-0.00916747	-2.56654e-05	-0.0189331	0.02288
735	2022-04-01 14:11:31	9561745	-1.00641e-10	-9.3535e-11	6.56622e-09	-1.30891e-10	4.19004e-10	-6.52154e-11	-1.8707e-13	6.53339e-09	-1.3076e-10	1.45394e-10	-0.00998186	-2.86329e-05	-0.0200141	0.0222541
736	2022-04-01 14:11:45	9575788	-1.06188e-10	-8.86925e-11	6.44412e-09	-1.32633e-10	4.11524e-10	-6.88098e-11	-1.77385e-13	6.4119e-09	-1.325e-10	1.42799e-10	-0.0107316	-2.7665e-05	-0.0206648	0.0222709
737	2022-04-01 14:11:59	9589831	-9.95448e-11	-9.24703e-11	6.39968e-09	-1.22936e-10	3.9649e-10	-6.4505e-11	-1.84941e-13	6.36768e-09	-1.22813e-10	1.37582e-10	-0.0101301	-2.90436e-05	-0.0192869	0.0216063
738	2022-04-01 14:12:13	9603875	-1.00125e-10	-8.59793e-11	6.33132e-09	-1.23237e-10	3.88343e-10	-6.4881e-11	-1.71959e-13	6.29966e-09	-1.23114e-10	1.34755e-10	-0.0102991	-2.72965e-05	-0.0195429	0.0213908
739	2022-04-01 14:12:27	9617918	-1.1037e-10	-8.72182e-11	6.28442e-09	-1.30365e-10	3.78568e-10	-7.15198e-11	-1.74436e-13	6.253e-09	-1.30235e-10	1.31363e-10	-0.0114377	-2.78964e-05	-0.0208276	0.021008
740	2022-04-01 14:12:41	9631961	-9.77603e-11	-8.8713e-11	6.25893e-09	-1.24441e-10	3.7168e-10	-6.33487e-11	-1.77426e-13	6.22764e-09	-1.24317e-10	1.28973e-10	-0.0101722	-2.84901e-05	-0.0199621	0.0207098
741	2022-04-01 14:12:56	9646005	-1.06586e-10	-9.31358e-11	6.22116e-09	-1.28903e-10	3.69837e-10	-6.90677e-11	-1.86272e-13	6.19005e-09	-1.28774e-10	1.28333e-10	-0.0111579	-3.00921e-05	-0.0208034	0.0207322
742	2022-04-01 14:13:10	9660048	-9.29013e-11	-7.79731e-11	6.19938e-09	-1.3832e-10	3.52223e-10	-6.02e-11	-1.55946e-13	6.16838e-09	-1.38182e-10	1.22221e-10	-0.00975945	-2.52815e-05	-0.0224016	0.0198142
743	2022-04-01 14:13:24	9674091	-1.0421e-10	-8.77301e-11	6.20641e-09	-1.29064e-10	3.48852e-10	-6.75281e-11	-1.7546e-13	6.17538e-09	-1.28935e-10	1.21052e-10	-0.0109351	-2.84129e-05	-0.0208789	0.0196023
744	2022-04-01 14:13:38	9688135	-1.03242e-10	-9.04022e-11	6.18134e-09	-1.32332e-10	3.44921e-10	-6.69008e-11	-1.80804e-13	6.15043e-09	-1.322e-10	1.19688e-10	-0.0108774	-2.9397e-05	-0.0214944	0.01946
745	2022-04-01 14:13:52	9702178	-1.14293e-10	-7.91198e-11	6.1375e-09	-1.26204e-10	3.44859e-10	-7.40619e-11	-1.5824e-13	6.10681e-09	-1.26078e-10	1.19666e-10	-0.0121277	-2.5912e-05	-0.0206454	0.0195955
746	2022-04-01 14:14:06	9716221	-9.73518e-11	-7.6591e-11	6.13889e-09	-1.24861e-10	3.30178e-10	-6.3084e-11	-1.53182e-13	6.1082e-09	-1.24736e-10	1.14572e-10	-0.0103278	-2.50781e-05	-0.0204211	0.0187571
747	2022-04-01 14:14:20	9730265	-1.1224e-10	-8.25803e-11	6.10317e-09	-1.34063e-10	3.24979e-10	-7.27315e-11	-1.65161e-13	6.07265e-09	-1.33929e-10	1.12768e-10	-0.0119769	-2.71974e-05	-0.0220544	0.0185698
748	2022-04-01 14:14:34	9744308	-1.11799e-10	-8.43208e-11	6.09156e-09	-1.27709e-10	3.22369e-10	-7.24458e-11	-1.68642e-13	6.0611e-09	-1.27581e-10	1.11862e-10	-0.0119526	-2.78236e-05	-0.0210492	0.0184557
749	2022-04-01 14:14:48	9758351	-1.08886e-10	-9.32484e-11	6.10166e-09	-1.25183e-10	3.17869e-10	-7.05581e-11	-1.86497e-13	6.07115e-09	-1.25058e-10	1.10301e-10	-0.0116219	-3.07185e-05	-0.0205987	0.018168
750	2022-04-01 14:15:02	9772395	-9.7814e-11	-9.39139e-11	6.07314e-09	-1.34106e-10	3.15596e-10	-6.33835e-11	-1.87828e-13	6.04277e-09	-1.33972e-10	1.09512e-10	-0.0104891	-3.1083e-05	-0.0221706	0.0181228
751	2022-04-01 14:15:16	9786438	-1.03533e-10	-7.93144e-11	6.06608e-09	-1.28763e-10	3.04347e-10	-6.70894e-11	-1.58629e-13	6.03575e-09	-1.28634e-10	1.05608e-10	-0.0111153	-2.62815e-05	-0.0213121	0.0174971
752	2022-04-01 14:15:30	9800481	-1.00555e-10	-9.26341e-11	6.05309e-09	-1.25678e-10	3.05299e-10	-6.51596e-11	-1.85268e-13	6.02282e-09	-1.25552e-10	1.05939e-10	-0.0108188	-3.0761e-05	-0.0208461	0.0175895
753	2022-04-01 14:15:44	9814525	-1.11305e-10	-8.30922e-11	6.07506e-09	-1.26613e-10	2.97436e-10	-7.21256e-11	-1.66184e-13	6.04468e-09	-1.26486e-10	1.0321e-10	-0.0119321	-2.74926e-05	-0.0209252	0.0170746
754	2022-04-01 14:15:58	9828568	-1.15132e-10	-8.70236e-11	6.02713e-09	-1.30418e-10	2.95824e-10	-7.46055e-11	-1.74047e-13	5.99699e-09	-1.30288e-10	1.02651e-10	-0.0124405	-2.90224e-05	-0.0217255	0.0171171
755	2022-04-01 14:16:12	9842611	-1.09445e-10	-8.70953e-11	6.00685e-09	-1.22291e-10	2.96093e-10	-7.09204e-11	-1.74191e-13	5.97682e-09	-1.22169e-10	1.02744e-10	-0.0118659	-2.91444e-05	-0.0204404	0.0171905
756	2022-04-01 14:16:26	9856655	-1.02651e-10	-8.53753e-11	6.01887e-09	-1.34568e-10	2.92537e-10	-6.65178e-11	-1.70751e-13	5.98878e-09	-1.34433e-10	1.0151e-10	-0.0111071	-2.85118e-05	-0.0224476	0.0169501
757	2022-04-01 14:16:40	9870698	-1.10402e-10	-8.33687e-11	6.01049e-09	-1.36933e-10	2.82862e-10	-7.15405e-11	-1.66737e-13	5.98044e-09	-1.36796e-10	9.81531e-11	-0.0119624	-2.78805e-05	-0.0228739	0.0164124
758	2022-04-01 14:16:54	9884741	-1.03973e-10	-8.0676e-11	5.99303e-09	-1.24893e-10	2.91094e-10	-6.73745e-11	-1.61352e-13	5.96306e-09	-1.24768e-10	1.0101e-10	-0.0112986	-2.70586e-05	-0.0209235	0.0169392
759	2022-04-01 14:17:08	9898785	-1.11176e-10	-8.40546e-11	5.99848e-09	-1.31762e-10	2.78432e-10	-7.2042e-11	-1.68109e-13	5.96849e-09	-1.3163e-10	9.66159e-11	-0.0120704	-2.81661e-05	-0.0220542	0.0161877
760	2022-04-01 14:17:22	9912828	-1.04995e-10	-9.91248e-11	5.97667e-09	-1.30741e-10	2.89336e-10	-6.80368e-11	-1.9825e-13	5.94679e-09	-1.3061e-10	1.004e-10	-0.0114409	-3.33373e-05	-0.0219632	0.016883
761	2022-04-01 14:17:36	9926871	-1.09413e-10	-8.37065e-11	5.97388e-09	-1.30719e-10	2.82501e-10	-7.08996e-11	-1.67413e-13	5.94401e-09	-1.30588e-10	9.80278e-11	-0.0119279	-2.8165e-05	-0.0219697	0.0164919
762	2022-04-01 14:17:50	9940915	-1.01651e-10	-8.92249e-11	5.9932e-09	-1.27258e-10	2.82709e-10	-6.58698e-11	-1.7845e-13	5.96323e-09	-1.27131e-10	9.81e-11	-0.011046	-2.9925e-05	-0.0213191	0.0164508
763	2022-04-01 14:18:04	9954958	-1.16723e-10	-9.08425e-11	5.98003e-09	-1.336e-10	2.80251e-10	-7.56365e-11	-1.81685e-13	5.95013e-09	-1.33466e-10	9.72471e-11	-0.0127117	-3.05346e-05	-0.0224308	0.0163437
764	2022-04-01 14:18:19	9969001	-1.21195e-10	-8.75049e-11	5.98343e-09	-1.29537e-10	2.71636e-10	-7.85344e-11	-1.7501e-13	5.95351e-09	-1.29407e-10	9.42577e-11	-0.0131913	-2.93961e-05	-0.0217363	0.0158323
765	2022-04-01 14:18:33	9983045	-1.06844e-10	-8.60203e-11	5.94196e-09	-1.29526e-10	2.75914e-10	-6.92349e-11	-1.72041e-13	5.91225e-09	-1.29396e-10	9.57422e-11	-0.0117104	-2.9099e-05	-0.0218862	0.0161939
766	2022-04-01 14:18:47	9997088	-1.14874e-10	-8.01027e-11	5.92969e-09	-1.26183e-10	2.76866e-10	-7.44384e-11	-1.60205e-13	5.90004e-09	-1.26057e-10	9.60725e-11	-0.0126166	-2.71533e-05	-0.0213654	0.0162834
767	2022-04-01 14:19:01	10011131	-1.02673e-10	-9.17639e-11	5.9551e-09	-1.21485e-10	2.78662e-10	-6.65321e-11	-1.83528e-13	5.92532e-09	-1.21364e-10	9.66957e-11	-0.0112284	-3.09735e-05	-0.0204822	0.0163191
768	2022-04-01 14:19:15	10025175	-1.09735e-10	-8.9665e-11	5.92924e-09	-1.20862e-10	2.65156e-10	-7.11083e-11	-1.7933e-13	5.89959e-09	-1.20741e-10	9.20091e-11	-0.0120531	-3.0397e-05	-0.020466	0.0155958
769	2022-04-01 14:19:29	10039218	-9.9577e-11	-8.49146e-11	5.95737e-09	-1.14207e-10	2.71022e-10	-6.45259e-11	-1.69829e-13	5.92758e-09	-1.14093e-10	9.40446e-11	-0.0108857	-2.86507e-05	-0.0192478	0.0158656
770	2022-04-01 14:19:43	10053261	-1.10681e-10	-9.95648e-11	5.95376e-09	-1.23044e-10	2.69325e-10	-7.17213e-11	-1.9913e-13	5.92399e-09	-1.22921e-10	9.34558e-11	-0.0121069	-3.36141e-05	-0.0207497	0.0157758
771	2022-04-01 14:19:57	10067305	-1.01619e-10	-8.32355e-11	5.95008e-09	-1.24495e-10	2.67191e-10	-6.58491e-11	-1.66471e-13	5.92033e-09	-1.24371e-10	9.27153e-11	-0.0111225	-2.81185e-05	-0.0210074	0.0156605
772	2022-04-01 14:20:11	10081348	-1.14272e-10	-9.3873e-11	5.94507e-09	-1.32912e-10	2.63113e-10	-7.40483e-11	-1.87746e-13	5.91534e-09	-1.32779e-10	9.13002e-11	-0.012518	-3.17388e-05	-0.0224466	0.0154345
773	2022-04-01 14:20:25	10095391	-1.10187e-10	-9.84695e-11	5.92711e-09	-1.35525e-10	2.68549e-10	-7.14012e-11	-1.96939e-13	5.89747e-09	-1.35389e-10	9.31865e-11	-0.0121071	-3.33938e-05	-0.0229572	0.0158011
774	2022-04-01 14:20:39	10109435	-1.15089e-10	-8.73001e-11	5.93474e-09	-1.16884e-10	2.61001e-10	-7.45777e-11	-1.746e-13	5.90507e-09	-1.16767e-10	9.05673e-11	-0.0126294	-2.95679e-05	-0.0197741	0.0153372
775	2022-04-01 14:20:53	10123478	-1.03812e-10	-8.81191e-11	6.25876e-09	-1.27881e-10	2.59673e-10	-6.72702e-11	-1.76238e-13	6.22747e-09	-1.27753e-10	9.01065e-11	-0.0108022	-2.83001e-05	-0.0205145	0.0144692
776	2022-04-01 14:21:07	10137521	-1.0493e-10	-7.21784e-11	5.28093e-09	-1.31483e-10	2.63366e-10	-6.79946e-11	-1.44357e-13	5.25453e-09	-1.31352e-10	9.1388e-11	-0.0129402	-2.74729e-05	-0.0249978	0.0173922
777	2022-04-01 14:21:21	10151565	-1.03436e-10	-7.6335e-11	5.17024e-09	-1.28172e-10	2.68665e-10	-6.70265e-11	-1.5267e-13	5.14439e-09	-1.28044e-10	9.32268e-11	-0.0130291	-2.9677e-05	-0.02489	0.018122
778	2022-04-01 14:21:35	10165608	-1.03769e-10	-9.04227e-11	5.2646e-09	-1.21829e-10	2.56878e-10	-6.72423e-11	-1.80845e-13	5.23828e-09	-1.21707e-10	8.91367e-11	-0.0128367	-3.45238e-05	-0.0232342	0.0170164
779	2022-04-01 14:21:49	10179651	-1.09004e-10	-7.81472e-11	5.45977e-09	-1.10563e-10	2.67744e-10	-7.06346e-11	-1.56294e-13	5.43247e-09	-1.10452e-10	9.29072e-11	-0.0130023	-2.87704e-05	-0.0203319	0.0171022
780	2022-04-01 14:22:03	10193695	-9.962e-11	-8.46996e-11	5.55423e-09	-1.31182e-10	2.64157e-10	-6.45538e-11	-1.69399e-13	5.52646e-09	-1.31051e-10	9.16625e-11	-0.0116809	-3.06524e-05	-0.0237133	0.0165861
781	2022-04-01 14:22:17	10207738	-1.05382e-10	-8.02358e-11	5.63468e-09	-1.27086e-10	2.5856e-10	-6.82875e-11	-1.60472e-13	5.60651e-09	-1.26959e-10	8.97203e-11	-0.0121801	-2.86224e-05	-0.0226449	0.0160029
782	2022-04-01 14:22:31	10221781	-9.6137e-11	-8.04406e-11	1.94445e-08	-1.24474e-10	2.80766e-10	-6.22968e-11	-1.60881e-13	1.93473e-08	-1.2435e-10	9.74258e-11	-0.00321992	-8.31544e-06	-0.00642724	0.00503563
783	2022-04-01 14:22:46	10236335	-9.85558e-11	-7.93553e-11	1.13681e-07	-1.21861e-10	2.68273e-10	-6.38642e-11	-1.58711e-13	1.13113e-07	-1.21739e-10	9.30907e-11	-0.000564607	-1.40312e-06	-0.00107627	0.000822992
784	2022-04-01 14:23:00	10250108	-1.08865e-10	-9.848e-11	2.33812e-07	-1.24861e-10	2.30004e-10	-7.05445e-11	-1.9696e-13	2.32643e-07	-1.24736e-10	7.98114e-11	-0.000303231	-8.46619e-07	-0.00053617	0.000343064
785	2022-04-01 14:23:13	10263371	-1.06618e-10	-8.76789e-11	3.04941e-07	-1.22592e-10	2.26402e-10	-6.90885e-11	-1.75358e-13	3.03416e-07	-1.22469e-10	7.85615e-11	-0.000227702	-5.77945e-07	-0.000403635	0.000258923
786	2022-04-01 14:23:26	10276635	-1.16809e-10	-9.38012e-11	3.35399e-07	-1.24334e-10	2.0762e-10	-7.56922e-11	-1.87602e-13	3.33722e-07	-1.2421e-10	7.20441e-11	-0.000226812	-5.62152e-07	-0.000372195	0.000215881
787	2022-04-01 14:23:39	10289898	-1.1797e-10	-1.0624e-10	3.57526e-07	-1.35138e-10	1.97769e-10	-7.64446e-11	-2.1248e-13	3.55738e-07	-1.35003e-10	6.86258e-11	-0.00021489	-5.97293e-07	-0.0003795	0.000192911
788	2022-04-01 14:23:53	10303161	-1.1983e-10	-9.55514e-11	3.72487e-07	-1.24323e-10	1.89238e-10	-7.76498e-11	-1.91103e-13	3.70625e-07	-1.24199e-10	6.56656e-11	-0.000209511	-5.15624e-07	-0.000335106	0.000177175
789	2022-04-01 14:24:06	10316425	-1.13584e-10	-1.09281e-10	3.91658e-07	-1.25323e-10	1.75478e-10	-7.36024e-11	-2.18562e-13	3.897e-07	-1.25198e-10	6.08909e-11	-0.00018887	-5.60847e-07	-0.000321267	0.000156251
790	2022-04-01 14:24:19	10329688	-1.15067e-10	-9.99029e-11	4.02945e-07	-1.28365e-10	1.71639e-10	-7.45634e-11	-1.99806e-13	4.0093e-07	-1.28237e-10	5.95587e-11	-0.000185976	-4.98355e-07	-0.000319848	0.000148551
791	2022-04-01 14:24:32	10342951	-6.28014e-11	-1.03998e-10	4.05453e-07	-9.92438e-11	8.25029e-10	-4.06953e-11	-2.07996e-13	4.03426e-07	-9.91446e-11	2.86285e-10	-0.000100874	-5.15574e-07	-0.000245757	0.000709635
792	2022-04-01 14:24:46	10356214	2.65552e-09	-8.71874e-11	3.88612e-07	-4.58164e-11	2.39114e-09	1.72078e-09	-1.74375e-13	3.86669e-07	-4.57706e-11	8.29726e-10	0.00445026	-4.50967e-07	-0.000118372	0.00214583
793	2022-04-01 14:25:02	10372728	6.06303e-09	-9.86943e-11	3.59497e-07	-6.55749e-13	3.21744e-09	3.92884e-09	-1.97389e-13	3.577e-07	-6.55093e-13	1.11645e-09	0.0109836	-5.51828e-07	-1.83141e-06	0.0031212
794	2022-04-01 14:25:13	10383781	7.98716e-09	-8.8283e-11	3.63259e-07	2.88959e-11	3.31686e-09	5.17568e-09	-1.76566e-13	3.61443e-07	2.8867e-11	1.15095e-09	0.0143195	-4.88503e-07	7.98661e-05	0.00318432
795	2022-04-01 14:25:24	10394835	9.474e-09	-7.5383e-11	3.66932e-07	3.83129e-11	3.09894e-09	6.13915e-09	-1.50766e-13	3.65097e-07	3.82746e-11	1.07533e-09	0.0168151	-4.12947e-07	0.000104834	0.00294533
796	2022-04-01 14:25:36	10406928	1.06954e-08	-8.52934e-11	3.6953e-07	3.43354e-11	2.72179e-09	6.93062e-09	-1.70587e-13	3.67682e-07	3.43011e-11	9.44461e-10	0.0188495	-4.63952e-07	9.32899e-05	0.00256869
797	2022-04-01 14:25:47	10417451	1.14587e-08	-7.83725e-11	3.68813e-07	4.34514e-11	2.34963e-09	7.42524e-09	-1.56745e-13	3.66969e-07	4.34079e-11	8.15322e-10	0.020234	-4.27134e-07	0.000118288	0.00222177
798	2022-04-01 14:25:57	10427975	1.19397e-08	-8.17817e-11	3.66663e-07	3.15512e-11	2.0221e-09	7.73693e-09	-1.63563e-13	3.6483e-07	3.15196e-11	7.01669e-10	0.021207	-4.48328e-07	8.63955e-05	0.00192328
799	2022-04-01 14:26:08	10438498	1.22407e-08	-7.34889e-11	3.65499e-07	2.11667e-11	1.74464e-09	7.93197e-09	-1.46978e-13	3.63672e-07	2.11455e-11	6.0539e-10	0.0218108	-4.0415e-07	5.81446e-05	0.00166466
800	2022-04-01 14:26:19	10449021	1.25014e-08	-7.32841e-11	3.65051e-07	2.53592e-11	1.52188e-09	8.10091e-09	-1.46568e-13	3.63226e-07	2.53338e-11	5.28092e-10	0.0223027	-4.03518e-07	6.97468e-05	0.0014539
801	2022-04-01 14:26:29	10459545	1.27238e-08	-7.24549e-11	3.65499e-07	1.82857e-11	1.32281e-09	8.24502e-09	-1.4491e-13	3.63672e-07	1.82674e-11	4.59015e-10	0.0226716	-3.98463e-07	5.02305e-05	0.00126217
802	2022-04-01 14:26:40	10470068	1.28427e-08	-8.43106e-11	3.6532e-07	1.27817e-11	1.17672e-09	8.32207e-09	-1.68621e-13	3.63493e-07	1.27689e-11	4.08322e-10	0.0228947	-4.63891e-07	3.51283e-05	0.00112333
803	2022-04-01 14:26:50	10480591	1.21723e-08	-8.46279e-11	3.55466e-07	6.53599e-12	1.06149e-09	7.88765e-09	-1.69256e-13	3.53689e-07	6.52945e-12	3.68337e-10	0.0223011	-4.78545e-07	1.8461e-05	0.00104142
804	2022-04-01 14:27:01	10491114	9.57081e-09	-7.92734e-11	3.37997e-07	-3.31529e-11	7.87193e-10	6.20188e-09	-1.58547e-13	3.36307e-07	-3.31197e-11	2.73156e-10	0.0184411	-4.71435e-07	-9.84807e-05	0.000812222
805	2022-04-01 14:27:12	10502148	5.65996e-09	-7.45127e-11	3.09778e-07	-5.45024e-11	6.77226e-10	3.66765e-09	-1.49025e-13	3.08229e-07	-5.44479e-11	2.34997e-10	0.0118991	-4.83489e-07	-0.000176647	0.000762412
806	2022-04-01 14:27:23	10513201	4.01056e-09	-7.67753e-11	3.07001e-07	-7.48951e-11	6.05838e-10	2.59884e-09	-1.53551e-13	3.05466e-07	-7.48202e-11	2.10226e-10	0.0085078	-5.02677e-07	-0.000244938	0.000688213
807	2022-04-01 14:27:34	10524254	2.88574e-09	-7.4185e-11	3.06553e-07	-8.15278e-11	5.4044e-10	1.86996e-09	-1.4837e-13	3.0502e-07	-8.14463e-11	1.87533e-10	0.00613061	-4.86427e-07	-0.000267019	0.00061482
808	2022-04-01 14:27:45	10535307	2.12509e-09	-8.55903e-11	3.14078e-07	-8.32048e-11	5.03321e-10	1.37706e-09	-1.71181e-13	3.12508e-07	-8.31216e-11	1.74652e-10	0.00440648	-5.47765e-07	-0.000265983	0.000558874
809	2022-04-01 14:27:56	10546360	1.59258e-09	-7.67549e-11	3.25008e-07	-9.40086e-11	4.64484e-10	1.03199e-09	-1.5351e-13	3.23383e-07	-9.39146e-11	1.61176e-10	0.00319124	-4.747e-07	-0.000290413	0.000498406
810	2022-04-01 14:28:07	10557413	1.17367e-09	-7.65501e-11	3.34413e-07	-9.32668e-11	4.43391e-10	7.60538e-10	-1.531e-13	3.32741e-07	-9.31735e-11	1.53857e-10	0.00228568	-4.60118e-07	-0.000280018	0.000462392
811	2022-04-01 14:28:19	10569507	8.12257e-10	-8.50272e-11	3.44626e-07	-9.26863e-11	3.96159e-10	5.26343e-10	-1.70054e-13	3.42903e-07	-9.25936e-11	1.37467e-10	0.00153496	-4.95926e-07	-0.000270029	0.000400892
812	2022-04-01 14:28:32	10582771	5.54333e-10	-8.16077e-11	3.50987e-07	-9.37506e-11	3.82208e-10	3.59208e-10	-1.63215e-13	3.49232e-07	-9.36568e-11	1.32626e-10	0.00102856	-4.67355e-07	-0.000268179	0.000379765
813	2022-04-01 14:28:46	10596034	3.81151e-10	-9.65752e-11	3.52868e-07	-9.97383e-11	3.67073e-10	2.46986e-10	-1.9315e-13	3.51104e-07	-9.96386e-11	1.27374e-10	0.000703456	-5.50124e-07	-0.000283787	0.000362783
814	2022-04-01 14:28:59	10609297	2.56387e-10	-8.56415e-11	3.10584e-07	-1.0478e-10	4.66226e-10	1.66139e-10	-1.71283e-13	3.09031e-07	-1.04675e-10	1.6178e-10	0.000537612	-5.54258e-07	-0.000338721	0.000523509
815	2022-04-01 14:29:12	10622560	1.26978e-10	-9.2757e-11	2.1061e-07	-1.14487e-10	5.93061e-10	8.22817e-11	-1.85514e-13	2.09557e-07	-1.14373e-10	2.05792e-10	0.000392646	-8.85268e-07	-0.000545782	0.000982035
816	2022-04-01 14:29:25	10635823	5.95549e-11	-7.30487e-11	1.3312e-07	-1.19873e-10	6.55388e-10	3.85916e-11	-1.46097e-13	1.32454e-07	-1.19753e-10	2.2742e-10	0.000291357	-1.103e-06	-0.000904108	0.00171697
817	2022-04-01 14:29:39	10649087	4.04199e-12	-7.38984e-11	8.42075e-08	-1.20926e-10	6.84804e-10	2.61921e-12	-1.47797e-13	8.37865e-08	-1.20805e-10	2.37627e-10	3.12605e-05	-1.76397e-06	-0.00144182	0.0028361
818	2022-04-01 14:29:52	10662350	-2.06614e-11	-8.33584e-11	5.29817e-08	-1.15745e-10	6.80113e-10	-1.33886e-11	-1.66717e-13	5.27168e-08	-1.15629e-10	2.35999e-10	-0.000253972	-3.1625e-06	-0.0021934	0.00447674
819	2022-04-01 14:30:06	10676124	-5.32124e-11	-8.22527e-11	3.49967e-08	-1.19969e-10	6.58951e-10	-3.44816e-11	-1.64505e-13	3.48217e-08	-1.19849e-10	2.28656e-10	-0.000990234	-4.72422e-06	-0.00344179	0.00656648
820	2022-04-01 14:30:19	10689637	-6.33604e-11	-9.02998e-11	2.39506e-08	-1.28559e-10	6.28251e-10	-4.10575e-11	-1.806e-13	2.38308e-08	-1.2843e-10	2.18003e-10	-0.00172287	-7.5784e-06	-0.00538925	0.00914794
821	2022-04-01 14:30:33	10703150	-7.79696e-11	-7.97239e-11	1.72262e-08	-1.26613e-10	6.16174e-10	-5.05243e-11	-1.59448e-13	1.71401e-08	-1.26486e-10	2.13812e-10	-0.00294773	-9.30263e-06	-0.00737957	0.0124744
822	2022-04-01 14:30:46	10716663	-6.91868e-11	-9.07503e-11	1.31675e-08	-1.27871e-10	5.89275e-10	-4.4833e-11	-1.81501e-13	1.31017e-08	-1.27743e-10	2.04478e-10	-0.00342194	-1.38532e-05	-0.00975015	0.0156071
823	2022-04-01 14:31:00	10730177	-7.84318e-11	-8.68701e-11	1.06043e-08	-1.21775e-10	5.59076e-10	-5.08238e-11	-1.7374e-13	1.05513e-08	-1.21653e-10	1.93999e-10	-0.00481684	-1.64663e-05	-0.0115297	0.0183863
824	2022-04-01 14:31:13	10743690	-8.91281e-11	-8.80474e-11	9.11108e-09	-1.23904e-10	5.37891e-10	-5.7755e-11	-1.76095e-13	9.06552e-09	-1.2378e-10	1.86648e-10	-0.00637084	-1.94247e-05	-0.0136539	0.0205888
825	2022-04-01 14:31:27	10757203	-9.31808e-11	-8.64708e-11	8.11955e-09	-1.30268e-10	5.21013e-10	-6.03812e-11	-1.72942e-13	8.07895e-09	-1.30138e-10	1.80792e-10	-0.00747388	-2.14064e-05	-0.0161082	0.0223781
826	2022-04-01 14:31:40	10770717	-9.97598e-11	-8.62763e-11	7.44712e-09	-1.28526e-10	4.99306e-10	-6.46444e-11	-1.72553e-13	7.40988e-09	-1.28397e-10	1.73259e-10	-0.00872407	-2.32868e-05	-0.0173279	0.0233822
827	2022-04-01 14:31:55	10785271	-9.53738e-11	-8.80372e-11	7.05237e-09	-1.3059e-10	4.75111e-10	-6.18022e-11	-1.76074e-13	7.01711e-09	-1.30459e-10	1.64864e-10	-0.00880736	-2.50922e-05	-0.0185916	0.0234945
828	2022-04-01 14:32:09	10799314	-9.90718e-11	-9.29924e-11	6.7816e-09	-1.34407e-10	4.63554e-10	-6.41985e-11	-1.85985e-13	6.74769e-09	-1.34273e-10	1.60853e-10	-0.00951415	-2.75627e-05	-0.019899	0.0238383
829	2022-04-01 14:32:23	10813357	-9.22563e-11	-6.60868e-11	6.6371e-09	-1.32095e-10	4.3843e-10	-5.97821e-11	-1.32174e-13	6.60391e-09	-1.31963e-10	1.52135e-10	-0.00905252	-2.00144e-05	-0.0199825	0.0230371
830	2022-04-01 14:32:37	10827401	-1.11477e-10	-9.1815e-11	6.5139e-09	-1.33729e-10	4.24486e-10	-7.22371e-11	-1.8363e-13	6.48133e-09	-1.33595e-10	1.47297e-10	-0.0111454	-2.83321e-05	-0.0206123	0.0227263
831	2022-04-01 14:32:51	10841444	-8.80101e-11	-7.25982e-11	6.43581e-09	-1.26839e-10	4.13214e-10	-5.70305e-11	-1.45196e-13	6.40363e-09	-1.26712e-10	1.43385e-10	-0.00890597	-2.26741e-05	-0.0197875	0.0223912
832	2022-04-01 14:33:05	10855487	-9.41698e-11	-8.49658e-11	6.36726e-09	-1.30064e-10	4.07171e-10	-6.1022e-11	-1.69932e-13	6.33542e-09	-1.29934e-10	1.41288e-10	-0.00963188	-2.68225e-05	-0.0205091	0.0223013
833	2022-04-01 14:33:19	10869531	-9.45138e-11	-8.7986e-11	6.31846e-09	-1.2829e-10	3.96528e-10	-6.12449e-11	-1.75972e-13	6.28687e-09	-1.28162e-10	1.37595e-10	-0.00974173	-2.79904e-05	-0.0203856	0.0218861
834	2022-04-01 14:33:33	10883574	-9.99963e-11	-9.00234e-11	6.2785e-09	-1.17518e-10	3.87506e-10	-6.47976e-11	-1.80047e-13	6.24711e-09	-1.174e-10	1.34465e-10	-0.0103724	-2.88208e-05	-0.0187928	0.0215243
835	2022-04-01 14:33:47	10897617	-1.0092e-10	-7.71746e-11	6.24825e-09	-1.2972e-10	3.82361e-10	-6.53962e-11	-1.54349e-13	6.21701e-09	-1.2959e-10	1.32679e-10	-0.0105189	-2.48269e-05	-0.0208445	0.0213413
836	2022-04-01 14:34:01	10911661	-9.16328e-11	-8.91327e-11	6.20456e-09	-1.19174e-10	3.7436e-10	-5.93781e-11	-1.78265e-13	6.17354e-09	-1.19055e-10	1.29903e-10	-0.00961816	-2.88757e-05	-0.0192847	0.0210419
837	2022-04-01 14:34:15	10925704	-1.04307e-10	-7.95908e-11	6.20422e-09	-1.20582e-10	3.70728e-10	-6.75909e-11	-1.59182e-13	6.1732e-09	-1.20461e-10	1.28643e-10	-0.0109491	-2.57859e-05	-0.0195136	0.0208389
838	2022-04-01 14:34:29	10939747	-1.02296e-10	-9.06479e-11	6.17032e-09	-1.23764e-10	3.55548e-10	-6.62878e-11	-1.81296e-13	6.13947e-09	-1.2364e-10	1.23375e-10	-0.010797	-2.95296e-05	-0.0201386	0.0200954
839	2022-04-01 14:34:43	10953791	-1.00566e-10	-9.04125e-11	6.13304e-09	-1.30354e-10	3.48652e-10	-6.51668e-11	-1.80825e-13	6.10237e-09	-1.30224e-10	1.20982e-10	-0.0106789	-2.96319e-05	-0.0213398	0.0198254
840	2022-04-01 14:34:57	10967834	-1.07661e-10	-8.85184e-11	6.12759e-09	-1.29687e-10	3.51501e-10	-6.97643e-11	-1.77037e-13	6.09695e-09	-1.29557e-10	1.21971e-10	-0.0114425	-2.90369e-05	-0.0212495	0.0200052
841	2022-04-01 14:35:11	10981877	-1.16723e-10	-9.12725e-11	6.09483e-09	-1.29085e-10	3.4155e-10	-7.56365e-11	-1.82545e-13	6.06436e-09	-1.28956e-10	1.18518e-10	-0.0124723	-3.01013e-05	-0.0212646	0.0195434
842	2022-04-01 14:35:25	10995920	-9.9878e-11	-9.46408e-11	6.0822e-09	-1.24893e-10	3.42287e-10	-6.47209e-11	-1.89282e-13	6.05179e-09	-1.24768e-10	1.18774e-10	-0.0106945	-3.1277e-05	-0.0206167	0.0196262
843	2022-04-01 14:35:39	11009964	-1.14594e-10	-9.0955e-11	6.0848e-09	-1.33127e-10	3.23881e-10	-7.42569e-11	-1.8191e-13	6.05438e-09	-1.32994e-10	1.12387e-10	-0.012265	-3.0046e-05	-0.0219666	0.0185629
844	2022-04-01 14:35:54	11024007	-1.09649e-10	-9.70257e-11	6.0565e-09	-1.22743e-10	3.23605e-10	-7.10526e-11	-1.94051e-13	6.02622e-09	-1.2262e-10	1.12291e-10	-0.0117906	-3.22012e-05	-0.0203478	0.0186337
845	2022-04-01 14:36:08	11038050	-1.0063e-10	-8.97674e-11	6.07767e-09	-1.25344e-10	3.19328e-10	-6.52082e-11	-1.79535e-13	6.04728e-09	-1.25219e-10	1.10807e-10	-0.0107831	-2.96885e-05	-0.0207066	0.0183234
846	2022-04-01 14:36:22	11052094	-1.03973e-10	-8.7597e-11	6.03283e-09	-1.38341e-10	3.17692e-10	-6.73745e-11	-1.75194e-13	6.00267e-09	-1.38203e-10	1.10239e-10	-0.0112241	-2.9186e-05	-0.0230235	0.018365
847	2022-04-01 14:36:36	11066137	-1.03425e-10	-8.97879e-11	6.05433e-09	-1.33762e-10	3.10566e-10	-6.70194e-11	-1.79576e-13	6.02406e-09	-1.33628e-10	1.07766e-10	-0.0111253	-2.98098e-05	-0.0221824	0.0178893
848	2022-04-01 14:36:50	11080180	-1.02382e-10	-7.94577e-11	6.04565e-09	-1.32622e-10	3.10037e-10	-6.63435e-11	-1.58915e-13	6.01542e-09	-1.32489e-10	1.07583e-10	-0.0110289	-2.6418e-05	-0.022025	0.0178845
849	2022-04-01 14:37:04	11094223	-1.14261e-10	-9.19277e-11	6.01614e-09	-1.27494e-10	2.9997e-10	-7.40411e-11	-1.83855e-13	5.98606e-09	-1.27367e-10	1.0409e-10	-0.0123689	-3.07139e-05	-0.0212772	0.0173887
850	2022-04-01 14:37:18	11108267	-1.19873e-10	-8.8713e-11	6.01873e-09	-1.3976e-10	3.14061e-10	-7.76777e-11	-1.77426e-13	5.98864e-09	-1.3962e-10	1.08979e-10	-0.0129709	-2.96271e-05	-0.0233142	0.0181977
851	2022-04-01 14:37:32	11122310	-1.09112e-10	-9.14055e-11	6.00036e-09	-1.38008e-10	2.94526e-10	-7.07046e-11	-1.82811e-13	5.97036e-09	-1.3787e-10	1.02201e-10	-0.0118426	-3.06198e-05	-0.0230924	0.017118
852	2022-04-01 14:37:46	11136353	-1.1812e-10	-9.38012e-11	6.00191e-09	-1.28043e-10	2.92161e-10	-7.65418e-11	-1.87602e-13	5.9719e-09	-1.27915e-10	1.0138e-10	-0.012817	-3.14142e-05	-0.0214195	0.0169761
853	2022-04-01 14:38:00	11150397	-1.22033e-10	-8.31639e-11	5.98674e-09	-1.24689e-10	2.94242e-10	-7.90774e-11	-1.66328e-13	5.95681e-09	-1.24564e-10	1.02102e-10	-0.0132751	-2.79223e-05	-0.0209113	0.0171404
854	2022-04-01 14:38:14	11164440	-1.15014e-10	-7.9775e-11	5.97605e-09	-1.29042e-10	2.88974e-10	-7.45291e-11	-1.5955e-13	5.94617e-09	-1.28913e-10	1.00274e-10	-0.012534	-2.68324e-05	-0.02168	0.0168636
855	2022-04-01 14:38:28	11178483	-1.03414e-10	-7.95396e-11	5.97682e-09	-1.323e-10	2.92276e-10	-6.70123e-11	-1.59079e-13	5.94694e-09	-1.32168e-10	1.0142e-10	-0.0112684	-2.67498e-05	-0.0222245	0.0170541
856	2022-04-01 14:38:42	11192527	-1.14455e-10	-8.37679e-11	5.96681e-09	-1.21496e-10	2.93259e-10	-7.41668e-11	-1.67536e-13	5.93698e-09	-1.21375e-10	1.01761e-10	-0.0124924	-2.8219e-05	-0.0204438	0.0171402
857	2022-04-01 14:38:56	11206570	-1.06543e-10	-8.65117e-11	5.97635e-09	-1.25807e-10	2.85757e-10	-6.90399e-11	-1.73023e-13	5.94647e-09	-1.25681e-10	9.91577e-11	-0.0116102	-2.90968e-05	-0.0211354	0.0166751
858	2022-04-01 14:39:10	11220613	-1.05468e-10	-7.59563e-11	5.98143e-09	-1.19797e-10	2.88568e-10	-6.83433e-11	-1.51913e-13	5.95152e-09	-1.19677e-10	1.00133e-10	-0.0114833	-2.5525e-05	-0.0201087	0.0168248
859	2022-04-01 14:39:24	11234657	-1.18443e-10	-8.1147e-11	5.96495e-09	-1.20356e-10	2.81265e-10	-7.67511e-11	-1.62294e-13	5.93513e-09	-1.20236e-10	9.7599e-11	-0.0129317	-2.73447e-05	-0.0202583	0.0164443
860	2022-04-01 14:39:38	11248700	-1.12831e-10	-8.91122e-11	5.93743e-09	-1.27043e-10	2.70646e-10	-7.31145e-11	-1.78224e-13	5.90774e-09	-1.26916e-10	9.39142e-11	-0.012376	-3.01679e-05	-0.021483	0.0158968
861	2022-04-01 14:39:52	11262743	-1.1969e-10	-9.17946e-11	5.94711e-09	-1.33568e-10	2.71928e-10	-7.75591e-11	-1.83589e-13	5.91737e-09	-1.33434e-10	9.4359e-11	-0.013107	-3.10254e-05	-0.0225496	0.0159461
862	2022-04-01 14:40:06	11276787	-1.19142e-10	-7.91096e-11	5.94054e-09	-1.19443e-10	2.71836e-10	-7.7204e-11	-1.58219e-13	5.91084e-09	-1.19324e-10	9.43271e-11	-0.0130614	-2.67676e-05	-0.0201873	0.0159583
863	2022-04-01 14:40:20	11290830	-9.84375e-11	-8.16487e-11	5.93728e-09	-1.2485e-10	2.68481e-10	-6.37875e-11	-1.63297e-13	5.90759e-09	-1.24725e-10	9.31629e-11	-0.0107975	-2.76419e-05	-0.0211127	0.01577
864	2022-04-01 14:40:34	11304873	-1.05392e-10	-8.59077e-11	5.93083e-09	-1.27924e-10	2.68319e-10	-6.8294e-11	-1.71815e-13	5.90118e-09	-1.27796e-10	9.31067e-11	-0.011573	-2.91155e-05	-0.021656	0.0157777
865	2022-04-01 14:40:48	11318917	-1.12057e-10	-9.15489e-11	5.93031e-09	-1.18819e-10	2.65739e-10	-7.26129e-11	-1.83098e-13	5.90066e-09	-1.187e-10	9.22114e-11	-0.0123059	-3.10301e-05	-0.0201164	0.0156273
866	2022-04-01 14:41:02	11332960	-1.04339e-10	-8.85184e-11	5.92377e-09	-1.32289e-10	2.63696e-10	-6.76117e-11	-1.77037e-13	5.89415e-09	-1.32157e-10	9.15025e-11	-0.011471	-3.0036e-05	-0.0224217	0.0155243
867	2022-04-01 14:41:17	11347003	-1.04801e-10	-8.1065e-11	5.91299e-09	-1.32257e-10	2.66415e-10	-6.7911e-11	-1.6213e-13	5.88343e-09	-1.32125e-10	9.2446e-11	-0.0115428	-2.75571e-05	-0.0224571	0.015713
868	2022-04-01 14:41:31	11361047	-1.12584e-10	-9.3576e-11	5.91825e-09	-1.32181e-10	2.67091e-10	-7.29544e-11	-1.87152e-13	5.88866e-09	-1.32049e-10	9.26806e-11	-0.012389	-3.17818e-05	-0.0224243	0.0157388
869	2022-04-01 14:41:45	11375090	-1.09746e-10	-9.04022e-11	5.94072e-09	-1.34503e-10	2.60733e-10	-7.11154e-11	-1.80804e-13	5.91102e-09	-1.34368e-10	9.04744e-11	-0.012031	-3.05877e-05	-0.0227319	0.0153061
870	2022-04-01 14:41:59	11389133	-1.09004e-10	-9.0525e-11	5.45252e-09	-1.32773e-10	2.67644e-10	-7.06346e-11	-1.8105e-13	5.42526e-09	-1.3264e-10	9.28725e-11	-0.0130196	-3.33717e-05	-0.0244487	0.0171185
871	2022-04-01 14:42:13	11403177	-1.09241e-10	-8.79144e-11	5.22858e-09	-1.29193e-10	2.6772e-10	-7.07882e-11	-1.75829e-13	5.20244e-09	-1.29064e-10	9.28988e-11	-0.0136067	-3.37974e-05	-0.0248083	0.0178568
872	2022-04-01 14:42:27	11417220	-1.04715e-10	-8.80884e-11	5.19571e-09	-1.31762e-10	2.65486e-10	-6.78553e-11	-1.76177e-13	5.16973e-09	-1.3163e-10	9.21236e-11	-0.0131255	-3.40785e-05	-0.0254617	0.0178198
873	2022-04-01 14:42:41	11431263	-1.01447e-10	-8.29489e-11	5.36014e-09	-1.43103e-10	2.55995e-10	-6.57377e-11	-1.65898e-13	5.33334e-09	-1.4296e-10	8.88303e-11	-0.0123258	-3.11058e-05	-0.026805	0.0166557
874	2022-04-01 14:42:55	11445307	-1.09402e-10	-8.64708e-11	5.52865e-09	-1.32052e-10	2.64549e-10	-7.08925e-11	-1.72942e-13	5.50101e-09	-1.3192e-10	9.17985e-11	-0.0128872	-3.14382e-05	-0.0239811	0.0166876
875	2022-04-01 14:43:09	11459350	-9.8674e-11	-8.83034e-11	5.6056e-09	-1.34106e-10	2.62814e-10	-6.39408e-11	-1.76607e-13	5.57757e-09	-1.33972e-10	9.11965e-11	-0.0114639	-3.16637e-05	-0.0240198	0.0163506
876	2022-04-01 14:43:23	11473393	-1.09574e-10	-8.52012e-11	5.76416e-09	-1.26548e-10	2.69594e-10	-7.1004e-11	-1.70402e-13	5.73534e-09	-1.26421e-10	9.35491e-11	-0.0123801	-2.9711e-05	-0.0220425	0.016311
877	2022-04-01 14:43:37	11487437	-1.08832e-10	-8.06658e-11	4.49712e-08	-1.22173e-10	2.81465e-10	-7.05231e-11	-1.61332e-13	4.47463e-08	-1.22051e-10	9.76684e-11	-0.00157606	-3.60547e-06	-0.00272762	0.00218271
878	2022-04-01 14:43:51	11501991	-1.06274e-10	-9.25215e-11	1.83377e-07	-1.18325e-10	2.59266e-10	-6.88656e-11	-1.85043e-13	1.8246e-07	-1.18207e-10	8.99653e-11	-0.000377428	-1.01416e-06	-0.000647849	0.000493068
879	2022-04-01 14:44:05	11515765	-9.70186e-11	-9.04125e-11	2.57999e-07	-1.11799e-10	2.35394e-10	-6.28681e-11	-1.80825e-13	2.56709e-07	-1.11687e-10	8.16817e-11	-0.0002449	-7.04397e-07	-0.000435073	0.000318188
880	2022-04-01 14:44:19	11529028	-1.09778e-10	-9.81114e-11	3.15512e-07	-1.12692e-10	2.27009e-10	-7.11361e-11	-1.96223e-13	3.13934e-07	-1.12579e-10	7.87721e-11	-0.000226596	-6.25044e-07	-0.000358608	0.000250919
881	2022-04-01 14:44:32	11542291	-1.0006e-10	-9.86029e-11	3.49553e-07	-1.20539e-10	2.19369e-10	-6.48389e-11	-1.97206e-13	3.47805e-07	-1.20418e-10	7.6121e-11	-0.000186423	-5.67001e-07	-0.000346224	0.000218861
882	2022-04-01 14:44:45	11555554	-1.12842e-10	-9.1559e-11	3.74816e-07	-1.08703e-10	2.07951e-10	-7.31216e-11	-1.83118e-13	3.72942e-07	-1.08594e-10	7.2159e-11	-0.000196067	-4.91009e-07	-0.000291183	0.000193486
883	2022-04-01 14:44:58	11568817	-1.06994e-10	-9.63095e-11	3.90762e-07	-1.1095e-10	1.90321e-10	-6.93321e-11	-1.92619e-13	3.88808e-07	-1.10839e-10	6.60414e-11	-0.00017832	-4.95409e-07	-0.000285074	0.000169856
884	2022-04-01 14:45:12	11582081	-1.09123e-10	-9.74562e-11	3.91837e-07	-1.0564e-10	1.83302e-10	-7.07117e-11	-1.94912e-13	3.89878e-07	-1.05534e-10	6.36058e-11	-0.000181369	-4.99932e-07	-0.000270686	0.000163143
885	2022-04-01 14:45:25	11595344	-1.24044e-10	-9.87352e-11	3.90583e-07	-1.16938e-10	2.19914e-10	-8.03805e-11	-1.9747e-13	3.8863e-07	-1.16821e-10	7.63102e-11	-0.00020683	-5.08119e-07	-0.000300597	0.000196357
886	2022-04-01 14:45:38	11608607	4.26742e-10	-9.46612e-11	3.82251e-07	-8.23448e-11	1.41396e-09	2.76529e-10	-1.89322e-13	3.8034e-07	-8.22625e-11	4.90644e-10	0.000727057	-4.97772e-07	-0.000216287	0.00129002
887	2022-04-01 14:45:51	11621870	4.11049e-09	-8.08091e-11	3.63618e-07	-3.11212e-11	2.62009e-09	2.6636e-09	-1.61618e-13	3.618e-07	-3.10901e-11	9.09171e-10	0.00736207	-4.46706e-07	-8.59317e-05	0.00251291
888	2022-04-01 14:46:08	11638384	6.95187e-09	-8.51706e-11	3.59138e-07	5.48249e-12	3.20466e-09	4.50481e-09	-1.70341e-13	3.57342e-07	5.47701e-12	1.11202e-09	0.0126064	-4.76689e-07	1.53271e-05	0.00311191
889	2022-04-01 14:46:19	11649437	8.54535e-09	-8.16793e-11	3.61737e-07	2.01669e-11	3.16073e-09	5.53739e-09	-1.63359e-13	3.59928e-07	2.01467e-11	1.09677e-09	0.0153847	-4.53864e-07	5.59743e-05	0.0030472
890	2022-04-01 14:46:30	11660491	9.82181e-09	-8.15974e-11	3.6532e-07	1.98552e-11	2.89466e-09	6.36453e-09	-1.63195e-13	3.63493e-07	1.98353e-11	1.00445e-09	0.0175093	-4.48962e-07	5.45687e-05	0.00276332
891	2022-04-01 14:46:42	11672585	1.09461e-08	-9.28081e-11	3.65947e-07	3.72594e-11	2.50086e-09	7.09307e-09	-1.85616e-13	3.64117e-07	3.72221e-11	8.67798e-10	0.0194802	-5.0977e-07	0.000102226	0.00238329
892	2022-04-01 14:46:53	11683108	1.14594e-08	-8.68803e-11	3.64424e-07	3.50126e-11	2.15759e-09	7.42569e-09	-1.73761e-13	3.62602e-07	3.49776e-11	7.48684e-10	0.0204789	-4.79205e-07	9.64628e-05	0.00206475
893	2022-04-01 14:47:03	11693631	1.18578e-08	-8.54572e-11	3.62812e-07	1.06424e-11	1.84679e-09	7.68385e-09	-1.70914e-13	3.60998e-07	1.06318e-11	6.40836e-10	0.021285	-4.7345e-07	2.9451e-05	0.00177518
894	2022-04-01 14:47:14	11704154	1.2232e-08	-8.62558e-11	3.62095e-07	1.28677e-11	1.60093e-09	7.92634e-09	-1.72512e-13	3.60285e-07	1.28548e-11	5.55523e-10	0.0220002	-4.7882e-07	3.56797e-05	0.0015419
895	2022-04-01 14:47:24	11714677	1.24249e-08	-8.34403e-11	3.61288e-07	3.40774e-12	1.39923e-09	8.05134e-09	-1.66881e-13	3.59482e-07	3.40433e-12	4.85533e-10	0.0223971	-4.64226e-07	9.47012e-06	0.00135065
896	2022-04-01 14:47:35	11725200	1.26097e-08	-8.20684e-11	3.61916e-07	1.08467e-11	1.23154e-09	8.17109e-09	-1.64137e-13	3.60106e-07	1.08359e-11	4.27344e-10	0.0226908	-4.55801e-07	3.00907e-05	0.00118672
897	2022-04-01 14:47:45	11735723	1.2648e-08	-7.57617e-11	3.62812e-07	-5.43949e-12	1.08335e-09	8.1959e-09	-1.51523e-13	3.60998e-07	-5.43405e-12	3.75922e-10	0.0227035	-4.19735e-07	-1.50529e-05	0.00104134
898	2022-04-01 14:47:56	11746246	1.10502e-08	-8.9747e-11	3.68634e-07	-1.68129e-11	7.72014e-10	7.16053e-09	-1.79494e-13	3.66791e-07	-1.67961e-11	2.67889e-10	0.0195221	-4.89363e-07	-4.5792e-05	0.000730359
899	2022-04-01 14:48:07	11757280	4.25756e-09	-7.54136e-11	1.78002e-07	-8.98161e-11	5.0981e-10	2.7589e-09	-1.50827e-13	1.77112e-07	-8.97263e-11	1.76904e-10	0.0155771	-8.51592e-07	-0.000506608	0.000998826
900	2022-04-01 14:48:18	11768333	2.54796e-09	-8.33584e-11	1.39839e-07	-9.31486e-11	4.59454e-10	1.65108e-09	-1.66717e-13	1.3914e-07	-9.30555e-11	1.59431e-10	0.0118663	-1.1982e-06	-0.000668791	0.00114583
901	2022-04-01 14:48:29	11779386	2.00793e-09	-8.87539e-11	1.33658e-07	-1.06564e-10	4.45218e-10	1.30114e-09	-1.77508e-13	1.3299e-07	-1.06457e-10	1.54491e-10	0.00978375	-1.33475e-06	-0.000800494	0.00116167
902	2022-04-01 14:48:40	11790440	1.74577e-09	-8.66141e-11	1.34823e-07	-9.93298e-11	4.21791e-10	1.13126e-09	-1.73228e-13	1.34149e-07	-9.92305e-11	1.46361e-10	0.00843286	-1.29131e-06	-0.000739704	0.00109104
903	2022-04-01 14:48:51	11801493	1.50999e-09	-9.56438e-11	1.34823e-07	-1.0292e-10	4.12093e-10	9.78474e-10	-1.91288e-13	1.34149e-07	-1.02817e-10	1.42996e-10	0.00729394	-1.42594e-06	-0.00076644	0.00106595
904	2022-04-01 14:49:02	11812546	1.31266e-09	-8.32458e-11	1.38674e-07	-9.46643e-11	3.98356e-10	8.50604e-10	-1.66492e-13	1.37981e-07	-9.45696e-11	1.3823e-10	0.00616466	-1.20663e-06	-0.000685383	0.0010018
905	2022-04-01 14:49:13	11823600	1.1455e-09	-9.01974e-11	1.38137e-07	-1.0378e-10	3.78399e-10	7.42284e-10	-1.80395e-13	1.37446e-07	-1.03676e-10	1.31304e-10	0.00540054	-1.31247e-06	-0.000754303	0.000955314
906	2022-04-01 14:49:24	11834653	1.00686e-09	-8.55391e-11	1.38316e-07	-1.13251e-10	3.68601e-10	6.52445e-10	-1.71078e-13	1.37624e-07	-1.13138e-10	1.27905e-10	0.00474077	-1.24308e-06	-0.000822076	0.000929374
907	2022-04-01 14:49:36	11846746	8.02561e-10	-8.68496e-11	1.36345e-07	-1.07005e-10	3.61767e-10	5.2006e-10	-1.73699e-13	1.35663e-07	-1.06898e-10	1.25533e-10	0.00383346	-1.28037e-06	-0.000787966	0.000925329
908	2022-04-01 14:49:50	11860010	6.53985e-10	-8.77403e-11	1.36524e-07	-1.17088e-10	3.41588e-10	4.23782e-10	-1.75481e-13	1.35841e-07	-1.16971e-10	1.18531e-10	0.00311968	-1.29181e-06	-0.000861085	0.000872569
909	2022-04-01 14:50:03	11873273	5.40788e-10	-8.13825e-11	1.36435e-07	-1.16443e-10	3.36597e-10	3.50431e-10	-1.62765e-13	1.35753e-07	-1.16327e-10	1.16799e-10	0.00258139	-1.19898e-06	-0.0008569	0.000860381
910	2022-04-01 14:50:16	11886536	4.42039e-10	-8.63274e-11	1.34016e-07	-1.07951e-10	3.28442e-10	2.86441e-10	-1.72655e-13	1.33346e-07	-1.07843e-10	1.13969e-10	0.00214811	-1.29479e-06	-0.000808747	0.00085469
911	2022-04-01 14:50:29	11899799	3.51481e-10	-9.40367e-11	1.35628e-07	-1.29075e-10	3.0953e-10	2.2776e-10	-1.88073e-13	1.3495e-07	-1.28946e-10	1.07407e-10	0.00168774	-1.39365e-06	-0.00095551	0.000795902
912	2022-04-01 14:50:43	11913063	2.90045e-10	-8.98391e-11	1.3527e-07	-1.32644e-10	3.01798e-10	1.87949e-10	-1.79678e-13	1.34594e-07	-1.32511e-10	1.04724e-10	0.00139642	-1.33497e-06	-0.000984529	0.000778075
913	2022-04-01 14:50:56	11926326	2.3393e-10	-9.11803e-11	1.37331e-07	-1.30977e-10	3.05529e-10	1.51587e-10	-1.82361e-13	1.36644e-07	-1.30846e-10	1.06019e-10	0.00110935	-1.33456e-06	-0.000957566	0.000775872
914	2022-04-01 14:51:09	11939589	1.81911e-10	-8.61431e-11	1.34106e-07	-1.26914e-10	2.93182e-10	1.17878e-10	-1.72286e-13	1.33435e-07	-1.26787e-10	1.01734e-10	0.000883411	-1.29116e-06	-0.000950175	0.000762422
915	2022-04-01 14:51:22	11952852	1.53262e-10	-8.54674e-11	1.37062e-07	-1.194e-10	2.91032e-10	9.93138e-11	-1.70935e-13	1.36377e-07	-1.19281e-10	1.00988e-10	0.000728231	-1.2534e-06	-0.000874641	0.000740509
916	2022-04-01 14:51:36	11966115	1.2156e-10	-9.60943e-11	1.3751e-07	-1.25957e-10	2.91601e-10	7.87709e-11	-1.92189e-13	1.36822e-07	-1.25831e-10	1.01186e-10	0.000575716	-1.40466e-06	-0.000919667	0.000739539
917	2022-04-01 14:51:49	11979379	8.91818e-11	-9.76705e-11	1.35449e-07	-1.18303e-10	2.87247e-10	5.77898e-11	-1.95341e-13	1.34772e-07	-1.18185e-10	9.96747e-11	0.000428798	-1.44942e-06	-0.000876925	0.000739582
918	2022-04-01 14:52:02	11992642	7.34438e-11	-8.72284e-11	1.35539e-07	-1.24291e-10	2.89174e-10	4.75916e-11	-1.74457e-13	1.34861e-07	-1.24167e-10	1.00343e-10	0.000352893	-1.2936e-06	-0.000920699	0.000744049
919	2022-04-01 14:52:15	12005905	3.81086e-11	-8.84365e-11	1.36166e-07	-1.21861e-10	2.80451e-10	2.46944e-11	-1.76873e-13	1.35485e-07	-1.21739e-10	9.73165e-11	0.000182266	-1.30548e-06	-0.000898542	0.000718282
920	2022-04-01 14:52:29	12019168	3.55286e-11	-8.70441e-11	1.35002e-07	-1.28741e-10	2.74892e-10	2.30225e-11	-1.74088e-13	1.34327e-07	-1.28612e-10	9.53875e-11	0.000171392	-1.296e-06	-0.000957457	0.000710114
921	2022-04-01 14:52:42	12032431	1.04597e-11	-9.09653e-11	1.36345e-07	-1.23635e-10	2.6944e-10	6.77789e-12	-1.81931e-13	1.35663e-07	-1.23511e-10	9.34957e-11	4.99611e-05	-1.34105e-06	-0.000910426	0.000689175
922	2022-04-01 14:52:55	12045695	-4.79449e-12	-9.78143e-11	1.3751e-07	-1.27355e-10	2.82548e-10	-3.10683e-12	-1.95629e-13	1.36822e-07	-1.27228e-10	9.80442e-11	-2.2707e-05	-1.4298e-06	-0.000929874	0.000716579
923	2022-04-01 14:53:08	12058958	-1.32332e-11	-9.38627e-11	1.37689e-07	-1.21926e-10	3.04232e-10	-8.57511e-12	-1.87725e-13	1.37001e-07	-1.21804e-10	1.05569e-10	-6.25918e-05	-1.37025e-06	-0.000889077	0.00077057
924	2022-04-01 14:53:22	12072221	8.95473e-12	-9.82848e-11	1.35091e-07	-1.28612e-10	3.41442e-10	5.80267e-12	-1.9657e-13	1.34416e-07	-1.28483e-10	1.1848e-10	4.31696e-05	-1.4624e-06	-0.000955867	0.000881448
925	2022-04-01 14:53:35	12085485	3.13792e-11	-8.83444e-11	1.35002e-07	-1.24162e-10	3.66904e-10	2.03337e-11	-1.76689e-13	1.34327e-07	-1.24038e-10	1.27316e-10	0.000151375	-1.31536e-06	-0.000923402	0.000947804
926	2022-04-01 14:53:48	12098748	5.54376e-11	-9.10472e-11	1.34464e-07	-1.15755e-10	3.87874e-10	3.59236e-11	-1.82094e-13	1.33792e-07	-1.15639e-10	1.34592e-10	0.000268504	-1.36103e-06	-0.000864323	0.00100598
927	2022-04-01 14:54:02	12112011	5.57816e-11	-9.26852e-11	1.34285e-07	-1.30838e-10	4.06464e-10	3.61465e-11	-1.8537e-13	1.33614e-07	-1.30707e-10	1.41043e-10	0.00027053	-1.38736e-06	-0.000978248	0.0010556
928	2022-04-01 14:54:15	12125275	6.58866e-11	-8.65936e-11	1.36524e-07	-1.1797e-10	4.21207e-10	4.26945e-11	-1.73187e-13	1.35841e-07	-1.17852e-10	1.46159e-10	0.000314297	-1.27492e-06	-0.000867571	0.00107595
929	2022-04-01 14:54:28	12138538	5.81574e-11	-9.73638e-11	1.34285e-07	-1.26323e-10	4.14196e-10	3.7686e-11	-1.94728e-13	1.33614e-07	-1.26197e-10	1.43726e-10	0.000282052	-1.45739e-06	-0.00094449	0.00107568
930	2022-04-01 14:54:41	12151801	6.14254e-11	-8.81806e-11	1.35002e-07	-1.30418e-10	4.09659e-10	3.98037e-11	-1.76361e-13	1.34327e-07	-1.30288e-10	1.42152e-10	0.000296319	-1.31292e-06	-0.000969929	0.00105825
931	2022-04-01 14:54:55	12165064	5.51474e-11	-9.30231e-11	1.34374e-07	-1.21388e-10	4.09919e-10	3.57355e-11	-1.86046e-13	1.33702e-07	-1.21267e-10	1.42242e-10	0.000267277	-1.3915e-06	-0.000906991	0.00106387
932	2022-04-01 14:55:08	12178327	3.76786e-11	-9.38012e-11	1.33031e-07	-1.28709e-10	4.00176e-10	2.44157e-11	-1.87602e-13	1.32366e-07	-1.2858e-10	1.38861e-10	0.000184456	-1.4173e-06	-0.000971401	0.00104907
933	2022-04-01 14:55:21	12191591	3.71089e-11	-9.11598e-11	1.33031e-07	-1.26806e-10	4.04998e-10	2.40466e-11	-1.8232e-13	1.32366e-07	-1.26679e-10	1.40534e-10	0.000181667	-1.37739e-06	-0.000957038	0.00106171
934	2022-04-01 14:55:34	12204854	3.66681e-11	-1.01438e-10	1.34374e-07	-1.23786e-10	4.03569e-10	2.37609e-11	-2.02876e-13	1.33702e-07	-1.23662e-10	1.40038e-10	0.000177715	-1.51737e-06	-0.000924908	0.00104739
935	2022-04-01 14:55:48	12218117	3.40666e-11	-8.58565e-11	1.35808e-07	-1.19873e-10	3.95077e-10	2.20752e-11	-1.71713e-13	1.35129e-07	-1.19753e-10	1.37092e-10	0.000163364	-1.27073e-06	-0.000886214	0.00101453
936	2022-04-01 14:56:01	12231380	2.50582e-11	-9.92676e-11	1.36345e-07	-1.22786e-10	3.87882e-10	1.62377e-11	-1.98535e-13	1.35663e-07	-1.22663e-10	1.34595e-10	0.000119691	-1.46344e-06	-0.000904174	0.000992126
937	2022-04-01 14:56:14	12244644	1.84577e-11	-8.8805e-11	1.36256e-07	-1.38062e-10	3.73876e-10	1.19606e-11	-1.7761e-13	1.35575e-07	-1.37924e-10	1.29735e-10	8.82214e-05	-1.31005e-06	-0.00101733	0.000956926
938	2022-04-01 14:56:27	12257907	5.37499e-14	-9.4303e-11	1.36166e-07	-1.30289e-10	3.70275e-10	3.48299e-14	-1.88606e-13	1.35485e-07	-1.30159e-10	1.28485e-10	2.57076e-07	-1.39208e-06	-0.000960686	0.000948336
939	2022-04-01 14:56:41	12271170	-6.82623e-12	-9.71076e-11	1.34285e-07	-1.22764e-10	3.51347e-10	-4.4234e-12	-1.94215e-13	1.33614e-07	-1.22641e-10	1.21917e-10	-3.31059e-05	-1.45356e-06	-0.00091788	0.000912463
940	2022-04-01 14:56:54	12284433	-3.47224e-12	-1.02196e-10	1.33658e-07	-1.28247e-10	3.49965e-10	-2.25001e-12	-2.04392e-13	1.3299e-07	-1.28119e-10	1.21438e-10	-1.69187e-05	-1.5369e-06	-0.000963373	0.000913137
941	2022-04-01 14:57:07	12297696	-1.46092e-11	-1.00353e-10	1.33568e-07	-1.43437e-10	3.45197e-10	-9.46676e-12	-2.00706e-13	1.329e-07	-1.43294e-10	1.19783e-10	-7.12321e-05	-1.5102e-06	-0.0010782	0.000901303
942	2022-04-01 14:57:20	12310960	-2.71437e-11	-9.72e-11	1.34823e-07	-1.3288e-10	3.32981e-10	-1.75891e-11	-1.944e-13	1.34149e-07	-1.32747e-10	1.15544e-10	-0.000131116	-1.44914e-06	-0.000989551	0.000861315
943	2022-04-01 14:57:34	12324223	-3.91944e-11	-1.06148e-10	1.34464e-07	-1.33977e-10	3.27536e-10	-2.5398e-11	-2.12296e-13	1.33792e-07	-1.33843e-10	1.13655e-10	-0.000189832	-1.58677e-06	-0.00100038	0.000849492
944	2022-04-01 14:57:47	12337486	-4.80631e-11	-1.02483e-10	1.32045e-07	-1.47747e-10	3.16924e-10	-3.11449e-11	-2.04966e-13	1.31385e-07	-1.47599e-10	1.09973e-10	-0.000237051	-1.56004e-06	-0.00112341	0.000837027
945	2022-04-01 14:58:00	12350750	-4.12261e-11	-1.03936e-10	1.3097e-07	-1.35912e-10	3.1231e-10	-2.67145e-11	-2.07872e-13	1.30315e-07	-1.35776e-10	1.08372e-10	-0.000204999	-1.59515e-06	-0.00104191	0.000831611
946	2022-04-01 14:58:14	12364013	-3.07234e-11	-9.6319e-11	1.3097e-07	-1.29644e-10	3.1532e-10	-1.99088e-11	-1.92638e-13	1.30315e-07	-1.29514e-10	1.09416e-10	-0.000152774	-1.47825e-06	-0.000993855	0.000839626
947	2022-04-01 14:58:27	12377276	-4.48059e-11	-9.82952e-11	1.31777e-07	-1.37266e-10	3.06282e-10	-2.90342e-11	-1.9659e-13	1.31118e-07	-1.37129e-10	1.0628e-10	-0.000221436	-1.49934e-06	-0.00104584	0.000810566
948	2022-04-01 14:58:40	12390540	-5.46099e-11	-8.93068e-11	1.32314e-07	-1.32439e-10	3.02427e-10	-3.53872e-11	-1.78614e-13	1.31652e-07	-1.32307e-10	1.04942e-10	-0.000268793	-1.35671e-06	-0.00100497	0.000797115
949	2022-04-01 14:58:53	12403803	-4.33224e-11	-9.88171e-11	1.32852e-07	-1.34804e-10	2.89074e-10	-2.80729e-11	-1.97634e-13	1.32188e-07	-1.34669e-10	1.00309e-10	-0.000212372	-1.4951e-06	-0.00101877	0.000758835
950	2022-04-01 14:59:07	12417066	-5.30511e-11	-9.2757e-11	1.33927e-07	-1.26591e-10	2.90994e-10	-3.43771e-11	-1.85514e-13	1.33257e-07	-1.26464e-10	1.00975e-10	-0.000257975	-1.39215e-06	-0.000949024	0.000757744
951	2022-04-01 14:59:20	12430329	-5.35994e-11	-8.85491e-11	1.32493e-07	-1.3317e-10	2.88468e-10	-3.47324e-11	-1.77098e-13	1.31831e-07	-1.33037e-10	1.00098e-10	-0.000263463	-1.34338e-06	-0.00100915	0.000759296
952	2022-04-01 14:59:33	12443593	-5.70071e-11	-1.00373e-10	1.32941e-07	-1.35578e-10	2.82716e-10	-3.69406e-11	-2.00746e-13	1.32276e-07	-1.35442e-10	9.81025e-11	-0.000279268	-1.51763e-06	-0.00102394	0.000741648
953	2022-04-01 14:59:46	12456856	-4.86329e-11	-9.5081e-11	1.31956e-07	-1.25409e-10	2.74961e-10	-3.15141e-11	-1.90162e-13	1.31296e-07	-1.25284e-10	9.54115e-11	-0.000240023	-1.44834e-06	-0.000954206	0.000726689
954	2022-04-01 15:00:00	12470119	-6.50374e-11	-8.86106e-11	1.30881e-07	-1.26624e-10	2.70554e-10	-4.21442e-11	-1.77221e-13	1.30227e-07	-1.26497e-10	9.38822e-11	-0.000323622	-1.36087e-06	-0.000971364	0.000720914
955	2022-04-01 15:00:13	12483382	-7.26913e-11	-1.01838e-10	1.30522e-07	-1.32482e-10	2.71091e-10	-4.7104e-11	-2.03676e-13	1.29869e-07	-1.3235e-10	9.40686e-11	-0.000362703	-1.56831e-06	-0.0010191	0.000724332
956	2022-04-01 15:00:26	12496645	-6.61876e-11	-8.51706e-11	1.30433e-07	-1.33955e-10	2.7083e-10	-4.28896e-11	-1.70341e-13	1.29781e-07	-1.33821e-10	9.3978e-11	-0.000330477	-1.31253e-06	-0.00103113	0.000724129
957	2022-04-01 15:00:39	12509909	-6.66283e-11	-1.00384e-10	1.32672e-07	-1.31558e-10	2.64058e-10	-4.31751e-11	-2.00768e-13	1.32009e-07	-1.31426e-10	9.16281e-11	-0.000327063	-1.52087e-06	-0.00099559	0.000694107
958	2022-04-01 15:00:53	12523172	-6.61446e-11	-9.96771e-11	1.32762e-07	-1.26484e-10	2.57055e-10	-4.28617e-11	-1.99354e-13	1.32098e-07	-1.26358e-10	8.91981e-11	-0.000324468	-1.50914e-06	-0.000956542	0.000675241
959	2022-04-01 15:01:06	12536435	-6.44246e-11	-1.02821e-10	1.33478e-07	-1.35256e-10	2.62123e-10	-4.17471e-11	-2.05642e-13	1.32811e-07	-1.35121e-10	9.09567e-11	-0.000314336	-1.54839e-06	-0.00101739	0.00068486
960	2022-04-01 15:01:19	12549698	-7.08101e-11	-1.04387e-10	1.35628e-07	-1.2872e-10	2.50121e-10	-4.58849e-11	-2.08774e-13	1.3495e-07	-1.28591e-10	8.6792e-11	-0.000340015	-1.54705e-06	-0.000952882	0.000643142
961	2022-04-01 15:01:32	12562961	-7.33041e-11	-1.06783e-10	1.34195e-07	-1.33891e-10	2.52371e-10	-4.75011e-11	-2.13566e-13	1.33524e-07	-1.33757e-10	8.75727e-11	-0.000355749	-1.59946e-06	-0.00100175	0.000655858
962	2022-04-01 15:01:46	12576225	-6.74453e-11	-1.06475e-10	1.32135e-07	-1.20238e-10	2.50559e-10	-4.37046e-11	-2.1295e-13	1.31474e-07	-1.20118e-10	8.6944e-11	-0.000332419	-1.61971e-06	-0.000913621	0.0006613
963	2022-04-01 15:01:59	12589488	-6.60908e-11	-9.28798e-11	1.30253e-07	-1.34976e-10	2.55319e-10	-4.28268e-11	-1.8576e-13	1.29602e-07	-1.34841e-10	8.85957e-11	-0.00033045	-1.43331e-06	-0.00104043	0.0006836
964	2022-04-01 15:02:12	12602751	-6.17371e-11	-9.51629e-11	1.27208e-07	-1.29333e-10	2.42419e-10	-4.00056e-11	-1.90326e-13	1.26572e-07	-1.29204e-10	8.41194e-11	-0.00031607	-1.5037e-06	-0.00102079	0.000664597
965	2022-04-01 15:02:26	12616015	-7.83996e-11	-8.77301e-11	1.28462e-07	-1.45393e-10	2.33336e-10	-5.08029e-11	-1.7546e-13	1.2782e-07	-1.45248e-10	8.09676e-11	-0.000397458	-1.37272e-06	-0.00113635	0.000633452
966	2022-04-01 15:02:39	12629278	-8.24523e-11	-9.8039e-11	1.29089e-07	-1.38621e-10	2.33121e-10	-5.34291e-11	-1.96078e-13	1.28444e-07	-1.38482e-10	8.0893e-11	-0.000415973	-1.52657e-06	-0.00107816	0.000629794
967	2022-04-01 15:02:52	12642541	-7.25193e-11	-9.77933e-11	1.31149e-07	-1.3789e-10	2.29013e-10	-4.69925e-11	-1.95587e-13	1.30493e-07	-1.37752e-10	7.94675e-11	-0.000360114	-1.49883e-06	-0.00105563	0.000608978
968	2022-04-01 15:03:05	12655805	-6.90471e-11	-9.4651e-11	1.30522e-07	-1.26957e-10	2.26632e-10	-4.47425e-11	-1.89302e-13	1.29869e-07	-1.2683e-10	7.86413e-11	-0.000344519	-1.45763e-06	-0.000976597	0.000605541
969	2022-04-01 15:03:19	12669068	-7.71096e-11	-9.94219e-11	1.29089e-07	-1.34514e-10	2.34941e-10	-4.9967e-11	-1.98844e-13	1.28444e-07	-1.34379e-10	8.15245e-11	-0.000389019	-1.5481e-06	-0.00104621	0.000634711
970	2022-04-01 15:03:32	12682331	-5.19761e-11	-9.70667e-11	1.30253e-07	-1.33654e-10	2.2654e-10	-3.36805e-11	-1.94133e-13	1.29602e-07	-1.3352e-10	7.86094e-11	-0.000259877	-1.49792e-06	-0.00103024	0.000606546
971	2022-04-01 15:03:45	12695594	-7.99261e-11	-1.03476e-10	1.29357e-07	-1.37868e-10	2.26786e-10	-5.17921e-11	-2.06952e-13	1.2871e-07	-1.3773e-10	7.86947e-11	-0.000402393	-1.60789e-06	-0.00107008	0.00061141
972	2022-04-01 15:03:58	12708858	-8.47528e-11	-9.6719e-11	1.29716e-07	-1.34278e-10	2.27454e-10	-5.49198e-11	-1.93438e-13	1.29067e-07	-1.34144e-10	7.89265e-11	-0.000425513	-1.49874e-06	-0.00103933	0.000611514
973	2022-04-01 15:04:12	12722121	-6.85203e-11	-9.37295e-11	1.31328e-07	-1.20389e-10	2.3329e-10	-4.44012e-11	-1.87459e-13	1.30671e-07	-1.20269e-10	8.09516e-11	-0.000339793	-1.43458e-06	-0.00092039	0.000619506
974	2022-04-01 15:04:25	12735384	-6.63489e-11	-9.93495e-11	1.30522e-07	-1.29354e-10	2.26072e-10	-4.29941e-11	-1.98699e-13	1.29869e-07	-1.29225e-10	7.8447e-11	-0.000331056	-1.52999e-06	-0.000995035	0.000604045
975	2022-04-01 15:04:38	12748647	-7.90768e-11	-1.05779e-10	1.32045e-07	-1.33977e-10	2.26771e-10	-5.12418e-11	-2.11558e-13	1.31385e-07	-1.33843e-10	7.86895e-11	-0.000390013	-1.61022e-06	-0.00101871	0.000598924
976	2022-04-01 15:04:51	12761911	-6.94556e-11	-8.43412e-11	1.32762e-07	-1.30569e-10	2.22002e-10	-4.50072e-11	-1.68682e-13	1.32098e-07	-1.30438e-10	7.70347e-11	-0.00034071	-1.27695e-06	-0.000987435	0.000583162
977	2022-04-01 15:05:05	12775174	-6.64779e-11	-8.29079e-11	1.32224e-07	-1.29666e-10	2.12972e-10	-4.30777e-11	-1.65816e-13	1.31563e-07	-1.29536e-10	7.39013e-11	-0.00032743	-1.26035e-06	-0.000984596	0.000561718
978	2022-04-01 15:05:18	12788437	-6.76711e-11	-9.61552e-11	1.31956e-07	-1.32794e-10	2.1781e-10	-4.38509e-11	-1.9231e-13	1.31296e-07	-1.32661e-10	7.55801e-11	-0.000333984	-1.46471e-06	-0.0010104	0.000575645
979	2022-04-01 15:05:31	12801700	-6.85418e-11	-9.38627e-11	1.32583e-07	-1.34364e-10	2.11629e-10	-4.44151e-11	-1.87725e-13	1.3192e-07	-1.3423e-10	7.34353e-11	-0.000336682	-1.42302e-06	-0.00101751	0.000556665
980	2022-04-01 15:05:44	12814963	-7.13906e-11	-9.64733e-11	1.33837e-07	-1.3273e-10	2.16274e-10	-4.62611e-11	-1.92947e-13	1.33168e-07	-1.32597e-10	7.50471e-11	-0.00034739	-1.4489e-06	-0.000995716	0.000563553
981	2022-04-01 15:05:58	12828227	-7.15518e-11	-9.29924e-11	1.30253e-07	-1.24517e-10	2.12604e-10	-4.63656e-11	-1.85985e-13	1.29602e-07	-1.24392e-10	7.37736e-11	-0.000357754	-1.43505e-06	-0.000959806	0.000569233
982	2022-04-01 15:06:11	12841490	-7.94316e-11	-9.32689e-11	1.29448e-07	-1.36019e-10	2.12066e-10	-5.14717e-11	-1.86538e-13	1.28801e-07	-1.35883e-10	7.35869e-11	-0.000399622	-1.44827e-06	-0.00105499	0.000571324
983	2022-04-01 15:06:24	12854753	-8.33231e-11	-9.46408e-11	1.29985e-07	-1.32009e-10	2.14016e-10	-5.39934e-11	-1.89282e-13	1.29335e-07	-1.31877e-10	7.42636e-11	-0.000417469	-1.4635e-06	-0.00101965	0.000574195
984	2022-04-01 15:06:38	12868016	-8.35381e-11	-7.9816e-11	1.31418e-07	-1.32203e-10	2.08196e-10	-5.41327e-11	-1.59632e-13	1.30761e-07	-1.32071e-10	7.2244e-11	-0.000413982	-1.22079e-06	-0.00101002	0.000552489
985	2022-04-01 15:06:51	12881280	-7.63141e-11	-1.00691e-10	1.32135e-07	-1.29225e-10	2.04541e-10	-4.94515e-11	-2.01382e-13	1.31474e-07	-1.29096e-10	7.09757e-11	-0.000376131	-1.53172e-06	-0.000981909	0.000539845
986	2022-04-01 15:07:04	12894543	-7.04553e-11	-8.99722e-11	1.30433e-07	-1.35439e-10	2.09225e-10	-4.5655e-11	-1.79944e-13	1.29781e-07	-1.35304e-10	7.26011e-11	-0.000351786	-1.38653e-06	-0.00104255	0.000559413
987	2022-04-01 15:07:17	12907806	-7.63248e-11	-9.47533e-11	1.27656e-07	-1.28763e-10	2.06576e-10	-4.94585e-11	-1.89507e-13	1.27018e-07	-1.28634e-10	7.16819e-11	-0.000389382	-1.49197e-06	-0.00101273	0.000564345
988	2022-04-01 15:07:31	12921070	-8.14633e-11	-9.54905e-11	1.27745e-07	-1.35729e-10	2.01546e-10	-5.27882e-11	-1.90981e-13	1.27106e-07	-1.35593e-10	6.99365e-11	-0.000415308	-1.50253e-06	-0.00106677	0.00055022
989	2022-04-01 15:07:44	12934333	-7.81953e-11	-8.73922e-11	1.26402e-07	-1.33848e-10	2.03627e-10	-5.06706e-11	-1.74784e-13	1.2577e-07	-1.33714e-10	7.06586e-11	-0.000402883	-1.38971e-06	-0.00106316	0.000561808
990	2022-04-01 15:07:57	12947596	-7.10788e-11	-9.88686e-11	1.29268e-07	-1.40136e-10	2.09532e-10	-4.60591e-11	-1.97737e-13	1.28622e-07	-1.39996e-10	7.27076e-11	-0.000358097	-1.53736e-06	-0.00108843	0.000565283
991	2022-04-01 15:08:10	12960860	-7.50671e-11	-9.05865e-11	1.28373e-07	-1.28784e-10	2.00641e-10	-4.86435e-11	-1.81173e-13	1.27731e-07	-1.28655e-10	6.96224e-11	-0.000380827	-1.41839e-06	-0.00100723	0.00054507
992	2022-04-01 15:08:24	12974123	-7.53251e-11	-9.2542e-11	1.25953e-07	-1.24076e-10	2.05232e-10	-4.88107e-11	-1.85084e-13	1.25323e-07	-1.23952e-10	7.12155e-11	-0.000389478	-1.47685e-06	-0.000989058	0.000568255
993	2022-04-01 15:08:37	12987386	-8.26781e-11	-9.56229e-11	1.26849e-07	-1.31547e-10	2.09701e-10	-5.35754e-11	-1.91246e-13	1.26215e-07	-1.31415e-10	7.27662e-11	-0.000424478	-1.51524e-06	-0.00104121	0.000576527
994	2022-04-01 15:08:50	13000649	-7.66043e-11	-9.77019e-11	1.27924e-07	-1.31182e-10	2.02023e-10	-4.96396e-11	-1.95404e-13	1.27284e-07	-1.31051e-10	7.0102e-11	-0.00038999	-1.53518e-06	-0.00102959	0.000550751
995	2022-04-01 15:09:03	13013913	-8.14741e-11	-8.74946e-11	1.28014e-07	-1.28043e-10	2.06376e-10	-5.27952e-11	-1.74989e-13	1.27374e-07	-1.27915e-10	7.16125e-11	-0.00041449	-1.37382e-06	-0.00100425	0.000562222
996	2022-04-01 15:09:17	13027176	-7.93778e-11	-9.07708e-11	1.29537e-07	-1.31579e-10	1.94697e-10	-5.14368e-11	-1.81542e-13	1.28889e-07	-1.31447e-10	6.75599e-11	-0.000399077	-1.40851e-06	-0.00101985	0.00052417
997	2022-04-01 15:09:30	13040439	-7.98078e-11	-9.8459e-11	1.32762e-07	-1.31751e-10	1.98989e-10	-5.17155e-11	-1.96918e-13	1.32098e-07	-1.31619e-10	6.90492e-11	-0.000391493	-1.49069e-06	-0.000996374	0.000522711
998	2022-04-01 15:09:43	13053702	-8.38068e-11	-9.81114e-11	1.32493e-07	-1.32697e-10	2.00979e-10	-5.43068e-11	-1.96223e-13	1.31831e-07	-1.32564e-10	6.97397e-11	-0.000411944	-1.48845e-06	-0.00100557	0.00052901
999	2022-04-01 15:09:56	13066965	-8.05603e-11	-1.1007e-10	1.29716e-07	-1.29462e-10	2.00072e-10	-5.22031e-11	-2.2014e-13	1.29067e-07	-1.29333e-10	6.9425e-11	-0.000404464	-1.70562e-06	-0.00100205	0.000537897
1000	2022-04-01 15:10:10	13080228	-8.30328e-11	-9.86848e-11	1.29985e-07	-1.3187e-10	1.95058e-10	-5.38053e-11	-1.9737e-13	1.29335e-07	-1.31738e-10	6.76851e-11	-0.000416014	-1.52603e-06	-0.00101858	0.000523332
1001	2022-04-01 15:10:23	13093492	-8.06571e-11	-9.09346e-11	1.29806e-07	-1.41985e-10	1.9654e-10	-5.22658e-11	-1.81869e-13	1.29157e-07	-1.41843e-10	6.81994e-11	-0.000404669	-1.40813e-06	-0.00109822	0.000528035
1002	2022-04-01 15:10:36	13106755	-8.55053e-11	-8.13006e-11	1.27924e-07	-1.32117e-10	1.93423e-10	-5.54074e-11	-1.62601e-13	1.27284e-07	-1.31985e-10	6.71178e-11	-0.000435304	-1.27746e-06	-0.00103693	0.000527306
1003	2022-04-01 15:10:50	13120018	-8.78488e-11	-1.0277e-10	1.31687e-07	-1.20131e-10	1.81459e-10	-5.6926e-11	-2.0554e-13	1.31029e-07	-1.20011e-10	6.29663e-11	-0.000434455	-1.56867e-06	-0.000915914	0.000480554
1004	2022-04-01 15:11:03	13133281	-8.16461e-11	-1.01233e-10	1.30343e-07	-1.36567e-10	1.91595e-10	-5.29067e-11	-2.02466e-13	1.29691e-07	-1.3643e-10	6.64835e-11	-0.000407943	-1.56114e-06	-0.00105196	0.000512629
1005	2022-04-01 15:11:16	13146545	-8.21298e-11	-1.03149e-10	1.30074e-07	-1.32429e-10	1.92939e-10	-5.32201e-11	-2.06298e-13	1.29424e-07	-1.32297e-10	6.69498e-11	-0.000411209	-1.59397e-06	-0.0010222	0.000517292
1006	2022-04-01 15:11:29	13159808	-7.88188e-11	-9.72105e-11	1.30702e-07	-1.2643e-10	1.96018e-10	-5.10746e-11	-1.94421e-13	1.30048e-07	-1.26304e-10	6.80182e-11	-0.000392735	-1.49499e-06	-0.000971204	0.000523022
1007	2022-04-01 15:11:43	13173071	-8.21728e-11	-9.81933e-11	1.30164e-07	-1.32181e-10	1.82711e-10	-5.3248e-11	-1.96387e-13	1.29513e-07	-1.32049e-10	6.34007e-11	-0.000411139	-1.51634e-06	-0.00101958	0.000489531
1008	2022-04-01 15:11:56	13186335	-9.09878e-11	-9.73743e-11	1.30881e-07	-1.21001e-10	1.89322e-10	-5.89601e-11	-1.94749e-13	1.30227e-07	-1.2088e-10	6.56947e-11	-0.00045275	-1.49546e-06	-0.000928228	0.000504465
1009	2022-04-01 15:12:09	13199598	-8.58278e-11	-9.51014e-11	1.32403e-07	-1.28279e-10	1.82258e-10	-5.56164e-11	-1.90203e-13	1.31741e-07	-1.28151e-10	6.32435e-11	-0.000422165	-1.44376e-06	-0.000972748	0.00048006
1010	2022-04-01 15:12:22	13212861	-9.60726e-11	-1.04162e-10	1.30433e-07	-1.36557e-10	1.85122e-10	-6.2255e-11	-2.08324e-13	1.29781e-07	-1.3642e-10	6.42373e-11	-0.000479694	-1.6052e-06	-0.00105116	0.000494968
1011	2022-04-01 15:12:36	13226125	-8.54408e-11	-1.08923e-10	1.30791e-07	-1.36761e-10	1.86105e-10	-5.53656e-11	-2.17846e-13	1.30137e-07	-1.36624e-10	6.45784e-11	-0.000425441	-1.67397e-06	-0.00104985	0.000496234
1012	2022-04-01 15:12:49	13239388	-8.94076e-11	-1.0147e-10	1.30164e-07	-1.39825e-10	1.83517e-10	-5.79361e-11	-2.0294e-13	1.29513e-07	-1.39685e-10	6.36804e-11	-0.000447338	-1.56694e-06	-0.00107854	0.00049169
1013	2022-04-01 15:13:02	13252651	-8.46668e-11	-9.79476e-11	1.30164e-07	-1.44565e-10	1.89199e-10	-5.48641e-11	-1.95895e-13	1.29513e-07	-1.4442e-10	6.56521e-11	-0.000423618	-1.51255e-06	-0.0011151	0.000506914
1014	2022-04-01 15:13:15	13265914	-9.47826e-11	-9.19687e-11	1.30881e-07	-1.44791e-10	1.79878e-10	-6.14191e-11	-1.83937e-13	1.30227e-07	-1.44646e-10	6.24177e-11	-0.000471633	-1.41244e-06	-0.00111073	0.0004793
1015	2022-04-01 15:13:29	13279177	-8.27103e-11	-1.05585e-10	1.30702e-07	-1.40513e-10	1.8761e-10	-5.35963e-11	-2.1117e-13	1.30048e-07	-1.40372e-10	6.51007e-11	-0.000412125	-1.62378e-06	-0.00107939	0.000500588
1016	2022-04-01 15:13:42	13292440	-8.76661e-11	-1.08503e-10	1.33927e-07	-1.34837e-10	1.83548e-10	-5.68076e-11	-2.17006e-13	1.33257e-07	-1.34702e-10	6.36912e-11	-0.0004263	-1.62847e-06	-0.00101084	0.000477956
1017	2022-04-01 15:13:55	13305704	-8.70856e-11	-9.5859e-11	1.31239e-07	-1.25893e-10	1.86066e-10	-5.64315e-11	-1.91718e-13	1.30583e-07	-1.25767e-10	6.45649e-11	-0.000432151	-1.46817e-06	-0.000963121	0.000494436
1018	2022-04-01 15:14:08	13318967	-9.13426e-11	-1.06311e-10	1.31956e-07	-1.38094e-10	1.87418e-10	-5.919e-11	-2.12622e-13	1.31296e-07	-1.37956e-10	6.5034e-11	-0.000450813	-1.61941e-06	-0.00105072	0.000495323
1019	2022-04-01 15:14:22	13332230	-9.43741e-11	-1.0233e-10	1.33658e-07	-1.31999e-10	1.72314e-10	-6.11544e-11	-2.0466e-13	1.3299e-07	-1.31867e-10	5.9793e-11	-0.000459843	-1.53892e-06	-0.000991558	0.000449606
1020	2022-04-01 15:14:35	13345494	-7.68301e-11	-9.53362e-11	1.32762e-07	-1.3833e-10	1.85583e-10	-4.97859e-11	-1.90672e-13	1.32098e-07	-1.38192e-10	6.43973e-11	-0.000376886	-1.44341e-06	-0.00104613	0.000487496
1021	2022-04-01 15:14:48	13358757	-8.42691e-11	-9.26033e-11	1.31956e-07	-1.31053e-10	1.80476e-10	-5.46064e-11	-1.85207e-13	1.31296e-07	-1.30922e-10	6.26252e-11	-0.000415902	-1.4106e-06	-0.000997149	0.000476976
1022	2022-04-01 15:15:02	13372020	-8.35488e-11	-1.06066e-10	1.32852e-07	-1.40921e-10	1.82972e-10	-5.41396e-11	-2.12132e-13	1.32188e-07	-1.4078e-10	6.34913e-11	-0.000409566	-1.60478e-06	-0.001065	0.000480311
1023	2022-04-01 15:15:15	13385283	-9.03536e-11	-1.08022e-10	1.35539e-07	-1.42534e-10	1.81429e-10	-5.85491e-11	-2.16044e-13	1.34861e-07	-1.42391e-10	6.29559e-11	-0.000434143	-1.60197e-06	-0.00105584	0.000466819
1024	2022-04-01 15:15:28	13398546	-8.17213e-11	-9.99952e-11	1.35181e-07	-1.35836e-10	1.85636e-10	-5.29554e-11	-1.9999e-13	1.34505e-07	-1.357e-10	6.44157e-11	-0.000393706	-1.48686e-06	-0.00100888	0.000478909
1025	2022-04-01 15:15:41	13411810	-7.34331e-11	-1.06025e-10	1.35898e-07	-1.39954e-10	1.81728e-10	-4.75846e-11	-2.1205e-13	1.35219e-07	-1.39814e-10	6.30596e-11	-0.000351909	-1.5682e-06	-0.00103399	0.000466353
1026	2022-04-01 15:15:55	13425073	-8.14096e-11	-9.96771e-11	1.35181e-07	-1.43512e-10	1.89092e-10	-5.27534e-11	-1.99354e-13	1.34505e-07	-1.43368e-10	6.56149e-11	-0.000392204	-1.48213e-06	-0.0010659	0.000487825
1027	2022-04-01 15:16:08	13438336	-9.15576e-11	-1.04387e-10	1.35987e-07	-1.37943e-10	1.75609e-10	-5.93293e-11	-2.08774e-13	1.35307e-07	-1.37805e-10	6.09363e-11	-0.000438479	-1.54296e-06	-0.00101846	0.000450356
1028	2022-04-01 15:16:21	13451600	-7.98508e-11	-9.97086e-11	1.32493e-07	-1.41297e-10	1.78503e-10	-5.17433e-11	-1.99417e-13	1.31831e-07	-1.41156e-10	6.19405e-11	-0.000392499	-1.51268e-06	-0.00107074	0.00046985
1029	2022-04-01 15:16:34	13464863	-8.64406e-11	-1.02104e-10	1.32403e-07	-1.465e-10	1.73312e-10	-5.60135e-11	-2.04208e-13	1.31741e-07	-1.46354e-10	6.01393e-11	-0.000425179	-1.55007e-06	-0.00111092	0.000456496
1030	2022-04-01 15:16:48	13478126	-8.35488e-11	-1.01541e-10	1.35002e-07	-1.28354e-10	1.70433e-10	-5.41396e-11	-2.03082e-13	1.34327e-07	-1.28226e-10	5.91403e-11	-0.000403044	-1.51185e-06	-0.000954578	0.000440271
1031	2022-04-01 15:17:01	13491390	-8.85261e-11	-1.041e-10	1.34553e-07	-1.44522e-10	1.79049e-10	-5.73649e-11	-2.082e-13	1.3388e-07	-1.44377e-10	6.213e-11	-0.000428479	-1.55512e-06	-0.00107841	0.000464072
1032	2022-04-01 15:17:14	13504653	-9.28906e-11	-1.12751e-10	1.35987e-07	-1.37073e-10	1.74756e-10	-6.01931e-11	-2.25502e-13	1.35307e-07	-1.36936e-10	6.06403e-11	-0.000444863	-1.66659e-06	-0.00101204	0.000448168
1033	2022-04-01 15:17:27	13517916	-9.16006e-11	-9.78143e-11	1.33299e-07	-1.30719e-10	1.6859e-10	-5.93572e-11	-1.95629e-13	1.32633e-07	-1.30588e-10	5.85007e-11	-0.000447531	-1.47497e-06	-0.000984587	0.000441074
1034	2022-04-01 15:17:41	13531179	-9.7771e-11	-1.07499e-10	1.30343e-07	-1.34052e-10	1.72506e-10	-6.33556e-11	-2.14998e-13	1.29691e-07	-1.33918e-10	5.98596e-11	-0.000488511	-1.65777e-06	-0.00103259	0.000461554
1035	2022-04-01 15:17:54	13544442	-9.26541e-11	-1.01429e-10	1.27477e-07	-1.38459e-10	1.79878e-10	-6.00399e-11	-2.02858e-13	1.2684e-07	-1.38321e-10	6.24177e-11	-0.000473353	-1.59933e-06	-0.00109052	0.000492099
1036	2022-04-01 15:18:07	13557706	-8.59031e-11	-1.02175e-10	1.31149e-07	-1.23517e-10	1.83371e-10	-5.56652e-11	-2.0435e-13	1.30493e-07	-1.23393e-10	6.36297e-11	-0.000426575	-1.56598e-06	-0.000945593	0.000487609
1037	2022-04-01 15:18:20	13570969	-9.51373e-11	-1.08257e-10	1.29537e-07	-1.36514e-10	1.74456e-10	-6.1649e-11	-2.16514e-13	1.28889e-07	-1.36377e-10	6.05362e-11	-0.000478309	-1.67984e-06	-0.0010581	0.000469676

## Sheet: INTERGRATION
Index	Real time	ms	Ethylene mbar	Carbon monoxide mbar	Argon mbar	Ethylene oxide mbar	Carbon dioxide mbar	Corrected Et	Corrected CO	Corrected Ar	Corrected EtO	Corrected CO2	ć Et	ć CO	ć EtO	ć CO2		Time (min)	Initial (time)	6.42996e+07	ć Et integral	ć CO Integral	ć EtO Integral	ć CO2 Intergral
1	2022-04-01 11:32:11	1551	-5.83509e-11	1.35142e-11	7.58375e-09	-9.43633e-11	4.36564e-10	-3.78114e-11	2.70284e-14	7.54583e-09	-9.42689e-11	1.51488e-10	-0.0050109	3.5819e-06	-0.0124928	0.0200757		0	0		0	0	0	0
2	2022-04-01 11:32:36	26321	-5.78994e-11	-2.41311e-11	7.76963e-09	-9.60188e-11	3.90086e-10	-3.75188e-11	-4.82622e-14	7.73078e-09	-9.59228e-11	1.3536e-10	-0.00485317	-6.24286e-06	-0.0124079	0.0175092		0.416667	0.416667		-0.00205501	-5.54367e-07	-0.00518766	0.00783018
3	2022-04-01 11:32:49	39834	-5.88239e-11	-2.88509e-11	8.62567e-09	-9.93513e-11	3.77685e-10	-3.81179e-11	-5.77018e-14	8.58254e-09	-9.92519e-11	1.31057e-10	-0.00444133	-6.72316e-06	-0.0115644	0.0152701		0.633333	0.633333		-0.00306192	-1.95902e-06	-0.00778466	0.0113813
4	2022-04-01 11:33:03	53348	-6.45644e-11	-2.60866e-11	6.75338e-09	-9.41161e-11	3.53597e-10	-4.18377e-11	-5.21732e-14	6.71961e-09	-9.4022e-11	1.22698e-10	-0.00622621	-7.76432e-06	-0.0139922	0.0182597		0.866667	0.866667		-0.00430646	-3.64923e-06	-0.0107663	0.0152931
5	2022-04-01 11:33:17	67901	-5.21696e-11	-1.51932e-11	6.4818e-09	-8.15493e-11	3.52983e-10	-3.38059e-11	-3.03864e-14	6.44939e-09	-8.14678e-11	1.22485e-10	-0.00524172	-4.71151e-06	-0.0126319	0.0189917		1.1	1.1		-0.00564439	-5.10474e-06	-0.0138724	0.0196391
6	2022-04-01 11:33:31	81945	-5.38359e-11	-3.24751e-11	6.39582e-09	-8.45271e-11	3.42118e-10	-3.48857e-11	-6.49502e-14	6.36384e-09	-8.44426e-11	1.18715e-10	-0.00548186	-1.02061e-05	-0.0132691	0.0186546		1.33333	1.33333		-0.00689547	-6.84513e-06	-0.0168942	0.0240312
7	2022-04-01 11:33:45	95988	-5.58139e-11	-3.53418e-11	6.51807e-09	-9.36968e-11	3.36144e-10	-3.61674e-11	-7.06836e-14	6.48548e-09	-9.36031e-11	1.16642e-10	-0.00557667	-1.08987e-05	-0.0144327	0.0179851		1.56667	1.56667		-0.00818564	-9.30737e-06	-0.0201261	0.0283058
8	2022-04-01 11:34:00	110031	-5.36531e-11	-2.92502e-11	6.56941e-09	-8.68276e-11	3.22753e-10	-3.47672e-11	-5.85004e-14	6.53656e-09	-8.67408e-11	1.11995e-10	-0.00531888	-8.94972e-06	-0.0132701	0.0171337		1.81667	1.81667		-0.00954758	-1.17884e-05	-0.0235889	0.0326956
9	2022-04-01 11:34:14	124075	-6.34894e-11	-3.68775e-11	6.55623e-09	-9.25143e-11	3.25217e-10	-4.11411e-11	-7.3755e-14	6.52345e-09	-9.24218e-11	1.1285e-10	-0.00630665	-1.13061e-05	-0.0141676	0.0172992		2.05	2.05		-0.0109039	-1.41516e-05	-0.02679	0.0367128
10	2022-04-01 11:34:28	138118	-7.41211e-11	-3.51166e-11	1.1321e-08	-8.67523e-11	3.87329e-10	-4.80305e-11	-7.02332e-14	1.12644e-08	-8.66655e-11	1.34403e-10	-0.00426392	-6.23497e-06	-0.00769376	0.0119317		2.28333	2.28333		-0.0121371	-1.61981e-05	-0.0293405	0.0401231
11	2022-04-01 11:34:42	152671	-4.23656e-11	-3.6171e-11	9.82725e-08	-7.85823e-11	4.15171e-10	-2.74529e-11	-7.2342e-14	9.77811e-08	-7.85037e-11	1.44064e-10	-0.000280759	-7.39836e-07	-0.000802851	0.00147333		2.51667	2.51667		-0.0126673	-1.70118e-05	-0.0303317	0.041687
12	2022-04-01 11:34:56	166445	-4.51391e-11	-4.07475e-11	2.44741e-07	-7.06811e-11	3.55432e-10	-2.92501e-11	-8.1495e-14	2.43517e-07	-7.06104e-11	1.23335e-10	-0.000120115	-3.34658e-07	-0.000289961	0.000506473		2.75	2.75		-0.0127141	-1.71372e-05	-0.0304592	0.041918
13	2022-04-01 11:35:09	179708	-6.50266e-11	-4.5969e-11	3.19633e-07	-8.53978e-11	3.06512e-10	-4.21372e-11	-9.1938e-14	3.18035e-07	-8.53124e-11	1.0636e-10	-0.000132493	-2.89082e-07	-0.000268249	0.000334428		2.96667	2.96667		-0.0127415	-1.72047e-05	-0.0305197	0.0420091
14	2022-04-01 11:35:22	192971	-7.60561e-11	-4.80472e-11	3.78937e-07	-7.88081e-11	2.78117e-10	-4.92844e-11	-9.60944e-14	3.77042e-07	-7.87293e-11	9.65066e-11	-0.000130713	-2.54864e-07	-0.000208808	0.000255957		3.18333	3.18333		-0.01277	-1.72637e-05	-0.0305714	0.042073
15	2022-04-01 11:35:36	206235	-6.61876e-11	-5.2767e-11	4.10112e-07	-8.07753e-11	2.55649e-10	-4.28896e-11	-1.05534e-13	4.08061e-07	-8.06945e-11	8.87102e-11	-0.000105106	-2.58623e-07	-0.000197751	0.000217394		3.41667	3.41667		-0.0127975	-1.73236e-05	-0.0306188	0.0421283
16	2022-04-01 11:35:49	219498	-6.29304e-11	-4.08601e-11	4.28834e-07	-8.15171e-11	2.34733e-10	-4.07789e-11	-8.17202e-14	4.2669e-07	-8.14356e-11	8.14524e-11	-9.55704e-05	-1.91521e-07	-0.000190854	0.000190894		3.63333	3.63333		-0.0128192	-1.73723e-05	-0.0306609	0.0421725
17	2022-04-01 11:36:02	232761	-7.74643e-11	-5.40366e-11	4.38599e-07	-8.03776e-11	2.13218e-10	-5.01969e-11	-1.08073e-13	4.36406e-07	-8.02972e-11	7.39866e-11	-0.000115023	-2.47644e-07	-0.000183997	0.000169536		3.85	3.85		-0.0128421	-1.74199e-05	-0.0307015	0.0422115
18	2022-04-01 11:36:16	246025	-7.41103e-11	-5.47634e-11	4.28118e-07	-8.37853e-11	2.05079e-10	-4.80235e-11	-1.09527e-13	4.25977e-07	-8.37015e-11	7.11624e-11	-0.000112737	-2.57119e-07	-0.000196493	0.000167057		4.08333	4.08333		-0.0128686	-1.74788e-05	-0.0307459	0.0422508
19	2022-04-01 11:36:29	259288	-5.70286e-11	-5.09753e-11	4.26147e-07	-7.13798e-11	1.05639e-09	-3.69545e-11	-1.01951e-13	4.24016e-07	-7.13084e-11	3.66567e-10	-8.71536e-05	-2.4044e-07	-0.000168174	0.000864512		4.3	4.3		-0.0128903	-1.75327e-05	-0.0307854	0.0423626
20	2022-04-01 11:36:42	272551	2.73965e-09	-4.09728e-11	4.22922e-07	-1.40932e-11	4.79027e-09	1.77529e-09	-8.19456e-14	4.20807e-07	-1.40791e-11	1.66222e-09	0.00421878	-1.94734e-07	-3.34574e-05	0.00395008		4.51667	4.51667		-0.0124427	-1.75798e-05	-0.0308073	0.0428841
21	2022-04-01 11:37:00	290106	6.84924e-09	-4.32763e-11	3.96137e-07	4.61389e-11	6.58894e-09	4.43831e-09	-8.65526e-14	3.94156e-07	4.60928e-11	2.28636e-09	0.0112603	-2.1959e-07	0.00011694	0.00580065		4.81667	4.81667		-0.0101208	-1.7642e-05	-0.0307947	0.0443467
22	2022-04-01 11:37:08	298949	8.4267e-09	-3.24137e-11	4.04109e-07	7.11218e-11	7.40921e-09	5.4605e-09	-6.48274e-14	4.02088e-07	7.10507e-11	2.571e-09	0.0135803	-1.61227e-07	0.000176704	0.00639411		4.95	4.95		-0.00846479	-1.76674e-05	-0.0307752	0.0451597
23	2022-04-01 11:37:17	307792	9.58119e-09	-3.47991e-11	4.09305e-07	8.93108e-11	7.6785e-09	6.20861e-09	-6.95982e-14	4.07258e-07	8.92215e-11	2.66444e-09	0.0152449	-1.70894e-07	0.000219078	0.00654238		5.1	5.1		-0.0063029	-1.76923e-05	-0.0307455	0.04613
24	2022-04-01 11:37:27	317676	1.07371e-08	-2.72332e-11	4.13695e-07	1.17572e-10	7.55829e-09	6.95764e-09	-5.44664e-14	4.11627e-07	1.17454e-10	2.62273e-09	0.0169028	-1.3232e-07	0.000285342	0.00637162		5.26667	5.26667		-0.00362392	-1.77176e-05	-0.0307034	0.0472061
25	2022-04-01 11:37:35	325989	1.15178e-08	-2.65166e-11	4.17278e-07	1.27462e-10	7.16607e-09	7.46353e-09	-5.30332e-14	4.15192e-07	1.27335e-10	2.48663e-09	0.0179761	-1.27732e-07	0.000306689	0.00598911		5.4	5.4		-0.00129866	-1.77349e-05	-0.030664	0.0480302
26	2022-04-01 11:37:44	334302	1.23106e-08	-1.93704e-11	4.18353e-07	1.23388e-10	6.6285e-09	7.97727e-09	-3.87408e-14	4.16261e-07	1.23265e-10	2.30009e-09	0.0191641	-9.30685e-08	0.000296123	0.00552559		5.55	5.55		0.00148686	-1.77514e-05	-0.0306188	0.0488938
27	2022-04-01 11:37:52	342615	1.28072e-08	-2.40594e-11	4.17995e-07	1.47027e-10	6.02751e-09	8.29907e-09	-4.81188e-14	4.15905e-07	1.4688e-10	2.09155e-09	0.0199542	-1.15697e-07	0.000353157	0.0050289		5.68333	5.68333		0.00409474	-1.77654e-05	-0.0305755	0.0495974
28	2022-04-01 11:38:00	350928	1.33796e-08	-3.08166e-11	4.17368e-07	1.33987e-10	5.45591e-09	8.66998e-09	-6.16332e-14	4.15281e-07	1.33853e-10	1.8932e-09	0.0208774	-1.48413e-07	0.000322319	0.00455884		5.81667	5.81667		0.00681685	-1.7783e-05	-0.0305305	0.0502366
29	2022-04-01 11:38:09	359241	1.37169e-08	-2.13156e-11	4.16741e-07	1.29558e-10	4.90029e-09	8.88855e-09	-4.26312e-14	4.14657e-07	1.29428e-10	1.7004e-09	0.0214359	-1.02811e-07	0.000312134	0.00410074		5.96667	5.96667		0.00999035	-1.78018e-05	-0.0304829	0.0508861
30	2022-04-01 11:38:17	367555	1.40817e-08	-2.3353e-11	4.16113e-07	1.34944e-10	4.43599e-09	9.12494e-09	-4.6706e-14	4.14032e-07	1.34809e-10	1.53929e-09	0.0220392	-1.12808e-07	0.0003256	0.0037178		6.1	6.1		0.0128887	-1.78162e-05	-0.0304404	0.0514073
31	2022-04-01 11:38:25	375868	1.43874e-08	-2.29128e-11	4.15307e-07	1.20668e-10	3.97326e-09	9.32304e-09	-4.58256e-14	4.1323e-07	1.20547e-10	1.37872e-09	0.0225613	-1.10896e-07	0.000291719	0.00333645		6.23333	6.23333		0.0158621	-1.78311e-05	-0.0303992	0.0518776
32	2022-04-01 11:38:34	384181	1.45131e-08	-2.83288e-11	4.15038e-07	1.21732e-10	3.58439e-09	9.40449e-09	-5.66576e-14	4.12963e-07	1.2161e-10	1.24378e-09	0.0227732	-1.37198e-07	0.000294482	0.00301185		6.38333	6.38333		0.0192621	-1.78497e-05	-0.0303552	0.0523537
33	2022-04-01 11:38:42	392494	1.45668e-08	-3.31815e-11	4.14949e-07	1.02855e-10	3.21224e-09	9.43929e-09	-6.6363e-14	4.12874e-07	1.02752e-10	1.11465e-09	0.0228624	-1.60734e-07	0.00024887	0.00269973		6.51667	6.51667		0.0223045	-1.78696e-05	-0.030319	0.0527345
34	2022-04-01 11:38:50	400807	1.35092e-08	-4.44332e-11	4.11366e-07	9.60726e-11	2.98244e-09	8.75396e-09	-8.88664e-14	4.09309e-07	9.59765e-11	1.03491e-09	0.0213872	-2.17113e-07	0.000234484	0.00252842		6.65	6.65		0.0252545	-1.78948e-05	-0.0302868	0.053083
35	2022-04-01 11:38:59	409120	1.19056e-08	-3.65909e-11	3.86013e-07	3.60554e-11	2.07861e-09	7.71483e-09	-7.31818e-14	3.84083e-07	3.60193e-11	7.21278e-10	0.0200864	-1.90536e-07	9.37801e-05	0.00187792		6.8	6.8		0.028365	-1.79253e-05	-0.0302622	0.0534135
36	2022-04-01 11:39:07	417944	7.12157e-09	-3.07142e-11	3.48658e-07	1.81997e-11	1.71601e-09	4.61478e-09	-6.14284e-14	3.46915e-07	1.81815e-11	5.95455e-10	0.0133023	-1.77071e-07	5.24091e-05	0.00171643		6.93333	6.93333		0.0305909	-1.79498e-05	-0.0302524	0.0536531
37	2022-04-01 11:39:16	426787	5.31611e-09	-4.50066e-11	3.40595e-07	-1.06532e-11	1.47209e-09	3.44484e-09	-9.00132e-14	3.38892e-07	-1.06425e-11	5.10815e-10	0.010165	-2.6561e-07	-3.14039e-05	0.00150731		7.08333	7.08333		0.032351	-1.7983e-05	-0.0302508	0.0538949
38	2022-04-01 11:39:25	435630	4.06293e-09	-4.64501e-11	3.38983e-07	-2.34779e-11	1.28386e-09	2.63278e-09	-9.29002e-14	3.37288e-07	-2.34544e-11	4.45499e-10	0.00780573	-2.75433e-07	-6.95382e-05	0.00132083		7.23333	7.23333		0.0336988	-1.80236e-05	-0.0302584	0.054107
39	2022-04-01 11:39:34	444473	3.13781e-09	-4.61839e-11	3.38445e-07	-2.70254e-11	1.12917e-09	2.0333e-09	-9.23678e-14	3.36753e-07	-2.69984e-11	3.91822e-10	0.00603796	-2.7429e-07	-8.01727e-05	0.00116353		7.38333	7.38333		0.034737	-1.80649e-05	-0.0302696	0.0542933
40	2022-04-01 11:39:43	453316	2.41314e-09	-4.08499e-11	3.43641e-07	-4.09681e-11	1.02449e-09	1.56371e-09	-8.16998e-14	3.41923e-07	-4.09271e-11	3.55498e-10	0.0045733	-2.38942e-07	-0.000119697	0.0010397		7.53333	7.53333		0.0355329	-1.81033e-05	-0.0302846	0.0544586
41	2022-04-01 11:39:52	462160	1.91908e-09	-5.13849e-11	3.52509e-07	-5.05786e-11	9.49614e-10	1.24356e-09	-1.0277e-13	3.50746e-07	-5.0528e-11	3.29516e-10	0.00354548	-2.93003e-07	-0.000144059	0.000939471		7.68333	7.68333		0.0361418	-1.81432e-05	-0.0303044	0.054607
42	2022-04-01 11:40:01	471003	1.49992e-09	-4.70337e-11	3.59587e-07	-5.20299e-11	8.71029e-10	9.71948e-10	-9.40674e-14	3.57789e-07	-5.19779e-11	3.02247e-10	0.00271654	-2.62913e-07	-0.000145275	0.000844763		7.83333	7.83333		0.0366115	-1.81849e-05	-0.0303261	0.0547408
43	2022-04-01 11:40:09	479846	1.1822e-09	-4.77401e-11	3.65499e-07	-5.59536e-11	8.07321e-10	7.66066e-10	-9.54802e-14	3.63672e-07	-5.58976e-11	2.8014e-10	0.00210648	-2.62545e-07	-0.000153704	0.000770312		7.96667	7.96667		0.036933	-1.822e-05	-0.030346	0.0548485
44	2022-04-01 11:40:18	488689	9.1707e-10	-5.74151e-11	3.69888e-07	-5.48141e-11	7.27071e-10	5.94261e-10	-1.1483e-13	3.68039e-07	-5.47593e-11	2.52294e-10	0.00161467	-3.12006e-07	-0.000148787	0.000685509		8.11667	8.11667		0.0372121	-1.82631e-05	-0.0303687	0.0549577
45	2022-04-01 11:40:28	498573	6.69261e-10	-5.5777e-11	3.73562e-07	-6.19414e-11	6.71329e-10	4.33681e-10	-1.11554e-13	3.71694e-07	-6.18795e-11	2.32951e-10	0.00116677	-3.00123e-07	-0.000166479	0.000626728		8.28333	8.28333		0.0374439	-1.83141e-05	-0.030395	0.0550671
46	2022-04-01 11:40:39	509626	4.87823e-10	-5.94013e-11	3.74637e-07	-6.35324e-11	6.0947e-10	3.16109e-10	-1.18803e-13	3.72764e-07	-6.34689e-11	2.11486e-10	0.000848015	-3.18707e-07	-0.000170266	0.000567346		8.46667	8.46667		0.0376285	-1.83708e-05	-0.0304259	0.0551765
47	2022-04-01 11:40:53	523930	3.16834e-10	-5.91863e-11	3.59676e-07	-7.95821e-11	6.26194e-10	2.05308e-10	-1.18373e-13	3.57878e-07	-7.95025e-11	2.17289e-10	0.000573683	-3.30763e-07	-0.00022215	0.000607161		8.7	8.7		0.0377944	-1.84466e-05	-0.0304717	0.0553135
48	2022-04-01 11:41:07	537193	1.87447e-10	-5.50399e-11	2.58895e-07	-7.34331e-11	7.41929e-10	1.21466e-10	-1.1008e-13	2.57601e-07	-7.33597e-11	2.57449e-10	0.000471527	-4.27328e-07	-0.000284781	0.000999413		8.93333	8.93333		0.0379164	-1.8535e-05	-0.0305308	0.055501
49	2022-04-01 11:41:20	550456	8.40648e-11	-5.58896e-11	1.66535e-07	-8.33231e-11	8.26421e-10	5.4474e-11	-1.11779e-13	1.65702e-07	-8.32398e-11	2.86768e-10	0.000328746	-6.74578e-07	-0.000502345	0.00173062		9.15	9.15		0.0380031	-1.86544e-05	-0.0306161	0.0557967
50	2022-04-01 11:41:33	563720	3.75174e-11	-4.23447e-11	1.04632e-07	-8.93108e-11	8.45871e-10	2.43113e-11	-8.46894e-14	1.04109e-07	-8.92215e-11	2.93517e-10	0.000233518	-8.1347e-07	-0.000857002	0.00281933		9.36667	9.36667		0.038064	-1.88156e-05	-0.0307633	0.0562896
51	2022-04-01 11:41:46	576983	1.02124e-12	-4.8252e-11	6.49663e-08	-8.46668e-11	8.31957e-10	6.61764e-13	-9.6504e-14	6.46415e-08	-8.45821e-11	2.88689e-10	1.02374e-05	-1.49291e-06	-0.00130848	0.004466		9.58333	9.58333		0.0380904	-1.90654e-05	-0.0309979	0.0570789
52	2022-04-01 11:42:00	590756	-2.34242e-11	-4.82623e-11	4.20049e-08	-9.57608e-11	7.98579e-10	-1.51789e-11	-9.65246e-14	4.17949e-08	-9.5665e-11	2.77107e-10	-0.000363176	-2.30948e-06	-0.00228892	0.00663016		9.81667	9.81667		0.0380492	-1.95091e-05	-0.0314176	0.0583734
53	2022-04-01 11:42:14	604270	-4.54294e-11	-5.05658e-11	2.82444e-08	-9.05148e-11	7.63429e-10	-2.94383e-11	-1.01132e-13	2.81032e-08	-9.04243e-11	2.6491e-10	-0.00104751	-3.59858e-06	-0.00321758	0.00942633		10.05	10.05		0.0378846	-2.01983e-05	-0.03206	0.0602467
54	2022-04-01 11:42:27	617783	-3.88934e-11	-5.96777e-11	1.98123e-08	-9.43741e-11	7.25629e-10	-2.52029e-11	-1.19355e-13	1.97132e-08	-9.42797e-11	2.51793e-10	-0.00127848	-6.05458e-06	-0.00478256	0.0127728		10.2667	10.2667		0.0376326	-2.12441e-05	-0.0329267	0.0626516
55	2022-04-01 11:42:41	631296	-6.53921e-11	-3.81061e-11	1.46798e-08	-9.25466e-11	6.92499e-10	-4.23741e-11	-7.62122e-14	1.46064e-08	-9.24541e-11	2.40297e-10	-0.00290106	-5.21773e-06	-0.00632969	0.0164515		10.5	10.5		0.037145	-2.25592e-05	-0.0342232	0.0660611
56	2022-04-01 11:42:54	644810	-6.21456e-11	-6.36808e-11	1.15667e-08	-7.57443e-11	6.68241e-10	-4.02703e-11	-1.27362e-13	1.15089e-08	-7.56686e-11	2.3188e-10	-0.00349907	-1.10664e-05	-0.00657481	0.0201479		10.7167	10.7167		0.0364517	-2.43233e-05	-0.0356211	0.070026
57	2022-04-01 11:43:08	658323	-7.13798e-11	-4.79347e-11	9.64358e-09	-9.47288e-11	6.29227e-10	-4.62541e-11	-9.58694e-14	9.59536e-09	-9.46341e-11	2.18342e-10	-0.00482047	-9.99122e-06	-0.00986248	0.0227549		10.95	10.95		0.0354811	-2.678e-05	-0.0375388	0.0750314
58	2022-04-01 11:43:21	671836	-5.51581e-11	-5.7968e-11	8.46333e-09	-8.88486e-11	6.06744e-10	-3.57424e-11	-1.15936e-13	8.42101e-09	-8.87598e-11	2.1054e-10	-0.00424444	-1.37675e-05	-0.0105403	0.0250018		11.1667	11.1667		0.034499	-2.93539e-05	-0.0397491	0.080205
59	2022-04-01 11:43:35	685350	-7.77116e-11	-4.44128e-11	7.66662e-09	-1.02361e-10	5.79239e-10	-5.03571e-11	-8.88256e-14	7.62829e-09	-1.02259e-10	2.00996e-10	-0.00660137	-1.16442e-05	-0.0134052	0.0263488		11.4	11.4		0.0332337	-3.23186e-05	-0.0425428	0.0861959
60	2022-04-01 11:43:48	698863	-7.25193e-11	-4.70132e-11	7.1408e-09	-1.0134e-10	5.64704e-10	-4.69925e-11	-9.40264e-14	7.1051e-09	-1.01239e-10	1.95952e-10	-0.00661392	-1.32337e-05	-0.0142487	0.0275791		11.6167	11.6167		0.031802	-3.50137e-05	-0.0455386	0.0920381
61	2022-04-01 11:44:03	713416	-7.26806e-11	-5.19275e-11	6.82534e-09	-1.02823e-10	5.36693e-10	-4.7097e-11	-1.03855e-13	6.79121e-09	-1.0272e-10	1.86232e-10	-0.00693499	-1.52926e-05	-0.0151255	0.0274226		11.8667	11.8667		0.0301084	-3.85795e-05	-0.0492104	0.0989133
62	2022-04-01 11:44:17	727460	-6.41344e-11	-5.56132e-11	6.61182e-09	-1.06704e-10	5.16006e-10	-4.15591e-11	-1.11226e-13	6.57876e-09	-1.06597e-10	1.79054e-10	-0.00631716	-1.69069e-05	-0.0162032	0.027217		12.1	12.1		0.0285623	-4.23361e-05	-0.0528654	0.105288
63	2022-04-01 11:44:31	741503	-8.40433e-11	-3.53213e-11	6.4631e-09	-9.84698e-11	5.04542e-10	-5.44601e-11	-7.06426e-14	6.43078e-09	-9.83713e-11	1.75076e-10	-0.00846865	-1.09851e-05	-0.0152969	0.0272247		12.3333	12.3333		0.0268373	-4.55901e-05	-0.0565404	0.111639
64	2022-04-01 11:44:45	755546	-7.74643e-11	-5.96982e-11	6.35115e-09	-1.06736e-10	4.9658e-10	-5.01969e-11	-1.19396e-13	6.31939e-09	-1.06629e-10	1.72313e-10	-0.0079433	-1.88936e-05	-0.0168733	0.0272674		12.5667	12.5667		0.0249226	-4.9076e-05	-0.0602936	0.117997
65	2022-04-01 11:44:59	769590	-7.93456e-11	-6.39265e-11	6.2709e-09	-1.03844e-10	4.74796e-10	-5.14159e-11	-1.27853e-13	6.23955e-09	-1.0374e-10	1.64754e-10	-0.00824034	-2.04908e-05	-0.0166262	0.0264048		12.8	12.8		0.0230345	-5.36708e-05	-0.0642019	0.124259
66	2022-04-01 11:45:13	783633	-7.21001e-11	-5.43232e-11	6.21448e-09	-9.72335e-11	4.59823e-10	-4.67209e-11	-1.08646e-13	6.18341e-09	-9.71363e-11	1.59559e-10	-0.00755584	-1.75706e-05	-0.0157092	0.0258043		13.0333	13.0333		0.0211916	-5.81113e-05	-0.0679744	0.13035
67	2022-04-01 11:45:27	797676	-8.14526e-11	-5.7067e-11	6.16592e-09	-9.10523e-11	4.45679e-10	-5.27813e-11	-1.14134e-13	6.13509e-09	-9.09612e-11	1.54651e-10	-0.00860318	-1.86035e-05	-0.0148264	0.0252076		13.2667	13.2667		0.0193064	-6.23316e-05	-0.0715368	0.136301
68	2022-04-01 11:45:41	811720	-8.07538e-11	-6.33942e-11	6.11164e-09	-1.09897e-10	4.28716e-10	-5.23285e-11	-1.26788e-13	6.08108e-09	-1.09787e-10	1.48764e-10	-0.00860512	-2.08496e-05	-0.0180539	0.0244635		13.5	13.5		0.0172988	-6.69345e-05	-0.0753729	0.142096
69	2022-04-01 11:45:55	825763	-9.11383e-11	-6.71822e-11	6.07573e-09	-1.07671e-10	4.25231e-10	-5.90576e-11	-1.34364e-13	6.04535e-09	-1.07563e-10	1.47555e-10	-0.0097691	-2.22261e-05	-0.0177927	0.024408		13.7333	13.7333		0.0151551	-7.196e-05	-0.079555	0.147798
70	2022-04-01 11:46:09	839806	-7.81308e-11	-5.95549e-11	6.05411e-09	-1.08284e-10	4.27089e-10	-5.06288e-11	-1.1911e-13	6.02384e-09	-1.08176e-10	1.482e-10	-0.00840473	-1.97731e-05	-0.0179579	0.0246022		13.9667	13.9667		0.0130348	-7.68599e-05	-0.0837259	0.153516
71	2022-04-01 11:46:23	853850	-9.22241e-11	-5.53266e-11	6.03638e-09	-9.46106e-11	4.05336e-10	-5.97612e-11	-1.10653e-13	6.0062e-09	-9.4516e-11	1.40652e-10	-0.00994992	-1.84232e-05	-0.0157364	0.0234177		14.2	14.2		0.0108934	-8.13161e-05	-0.0876569	0.159118
72	2022-04-01 11:46:37	867893	-9.22993e-11	-6.55134e-11	6.03172e-09	-1.09639e-10	4.03776e-10	-5.98099e-11	-1.31027e-13	6.00156e-09	-1.09529e-10	1.4011e-10	-0.00996573	-2.18321e-05	-0.0182501	0.0233456		14.4333	14.4333		0.00856995	-8.60126e-05	-0.091622	0.164574
73	2022-04-01 11:46:51	881936	-8.65481e-11	-5.63709e-11	6.00834e-09	-1.07467e-10	3.91491e-10	-5.60832e-11	-1.12742e-13	5.9783e-09	-1.0736e-10	1.35847e-10	-0.00938113	-1.88585e-05	-0.0179582	0.0227234		14.6667	14.6667		0.00631282	-9.07598e-05	-0.0958463	0.169948
74	2022-04-01 11:47:05	895980	-8.73651e-11	-6.23704e-11	5.95667e-09	-1.04285e-10	3.74069e-10	-5.66126e-11	-1.24741e-13	5.92689e-09	-1.04181e-10	1.29802e-10	-0.00955183	-2.10466e-05	-0.0175776	0.0219005		14.9	14.9		0.00410397	-9.54154e-05	-0.0999922	0.175154
75	2022-04-01 11:47:20	910023	-8.52688e-11	-6.29642e-11	5.96652e-09	-1.14035e-10	3.67211e-10	-5.52542e-11	-1.25928e-13	5.93669e-09	-1.13921e-10	1.27422e-10	-0.00930724	-2.12119e-05	-0.0191893	0.0214635		15.15	15.15		0.00174659	-0.000100698	-0.104588	0.180575
76	2022-04-01 11:47:34	924066	-8.51291e-11	-5.01972e-11	5.93842e-09	-1.09015e-10	3.79505e-10	-5.51637e-11	-1.00394e-13	5.90873e-09	-1.08906e-10	1.31688e-10	-0.00933596	-1.69909e-05	-0.0184314	0.0222871		15.3833	15.3833		-0.000428452	-0.000105155	-0.108977	0.185679
77	2022-04-01 11:47:48	938110	-8.08613e-11	-6.38958e-11	5.95025e-09	-9.92545e-11	3.62059e-10	-5.23981e-11	-1.27792e-13	5.9205e-09	-9.91552e-11	1.25634e-10	-0.00885029	-2.15846e-05	-0.0167478	0.0212203		15.6167	15.6167		-0.00255018	-0.000109655	-0.113081	0.190755
78	2022-04-01 11:48:02	952153	-9.01493e-11	-6.86974e-11	5.93626e-09	-1.10155e-10	3.73707e-10	-5.84167e-11	-1.37395e-13	5.90658e-09	-1.10045e-10	1.29676e-10	-0.00989012	-2.32613e-05	-0.0186309	0.0219546		15.85	15.85		-0.00473656	-0.000114887	-0.117209	0.195792
79	2022-04-01 11:48:16	966196	-7.86038e-11	-6.41825e-11	5.91988e-09	-1.07478e-10	3.62374e-10	-5.09353e-11	-1.28365e-13	5.89028e-09	-1.07371e-10	1.25744e-10	-0.00864734	-2.17927e-05	-0.0182284	0.0213477		16.0833	16.0833		-0.00689926	-0.000120144	-0.121509	0.200844
80	2022-04-01 11:48:30	980240	-8.96763e-11	-6.44896e-11	5.90177e-09	-1.03866e-10	3.62397e-10	-5.81102e-11	-1.28979e-13	5.87226e-09	-1.03762e-10	1.25752e-10	-0.00989572	-2.19641e-05	-0.0176699	0.0214145		16.3167	16.3167		-0.00906262	-0.000125248	-0.125697	0.205833
81	2022-04-01 11:48:44	994283	-8.76768e-11	-6.24215e-11	5.89956e-09	-9.86633e-11	3.51793e-10	-5.68146e-11	-1.24843e-13	5.87006e-09	-9.85646e-11	1.22072e-10	-0.0096787	-2.12677e-05	-0.0167911	0.0207957		16.55	16.55		-0.0113463	-0.000130292	-0.129718	0.210757
82	2022-04-01 11:48:58	1008326	-7.66688e-11	-5.84799e-11	5.89445e-09	-1.04919e-10	3.49459e-10	-4.96814e-11	-1.1696e-13	5.86498e-09	-1.04814e-10	1.21262e-10	-0.00847086	-1.99421e-05	-0.0178712	0.0206757		16.7833	16.7833		-0.0134638	-0.0001351	-0.133762	0.215596
83	2022-04-01 11:49:12	1022370	-8.14633e-11	-5.57872e-11	5.86146e-09	-1.12326e-10	3.43891e-10	-5.27882e-11	-1.11574e-13	5.83215e-09	-1.12214e-10	1.1933e-10	-0.00905124	-1.91309e-05	-0.0192405	0.0204607		17.0167	17.0167		-0.015508	-0.000139659	-0.138091	0.220395
84	2022-04-01 11:49:26	1036413	-7.93778e-11	-6.4633e-11	5.85852e-09	-1.01888e-10	3.36605e-10	-5.14368e-11	-1.29266e-13	5.82923e-09	-1.01786e-10	1.16802e-10	-0.00882395	-2.21755e-05	-0.0174613	0.0200373		17.25	17.25		-0.0175934	-0.000144478	-0.142373	0.22512
85	2022-04-01 11:49:40	1050456	-7.86576e-11	-5.53266e-11	5.84709e-09	-1.0694e-10	3.35169e-10	-5.09701e-11	-1.10653e-13	5.81785e-09	-1.06833e-10	1.16304e-10	-0.00876098	-1.90196e-05	-0.018363	0.0199908		17.4833	17.4833		-0.019645	-0.000149284	-0.146553	0.22979
86	2022-04-01 11:49:54	1064500	-8.75801e-11	-5.5859e-11	5.84673e-09	-9.81903e-11	3.29333e-10	-5.67519e-11	-1.11718e-13	5.8175e-09	-9.80921e-11	1.14279e-10	-0.00975538	-1.92038e-05	-0.0168616	0.0196439		17.7167	17.7167		-0.0218053	-0.000153743	-0.150662	0.234414
87	2022-04-01 11:50:08	1078543	-8.22266e-11	-5.91044e-11	5.82968e-09	-1.0866e-10	3.27129e-10	-5.32828e-11	-1.18209e-13	5.80053e-09	-1.08551e-10	1.13514e-10	-0.00918585	-2.0379e-05	-0.018714	0.0195695		17.95	17.95		-0.0240151	-0.000158361	-0.154813	0.238989
88	2022-04-01 11:50:22	1092586	-8.25491e-11	-6.56465e-11	5.85083e-09	-1.08488e-10	3.38233e-10	-5.34918e-11	-1.31293e-13	5.82158e-09	-1.0838e-10	1.17367e-10	-0.00918855	-2.25528e-05	-0.0186169	0.0201607		18.1833	18.1833		-0.0261587	-0.00016337	-0.159168	0.243624
89	2022-04-01 11:50:36	1106630	-8.45916e-11	-5.66268e-11	5.84598e-09	-1.1224e-10	3.30254e-10	-5.48154e-11	-1.13254e-13	5.81675e-09	-1.12128e-10	1.14598e-10	-0.00942371	-1.94703e-05	-0.0192767	0.0197014		18.4167	18.4167		-0.0283302	-0.000168272	-0.163589	0.248275
90	2022-04-01 11:50:50	1120673	-8.80101e-11	-5.33915e-11	5.82809e-09	-1.04124e-10	3.27874e-10	-5.70305e-11	-1.06783e-13	5.79895e-09	-1.0402e-10	1.13772e-10	-0.00983463	-1.84142e-05	-0.0179377	0.0196195		18.65	18.65		-0.030577	-0.000172692	-0.167931	0.252862
91	2022-04-01 11:51:04	1134716	-7.97971e-11	-6.62198e-11	5.82378e-09	-1.1324e-10	3.18736e-10	-5.17085e-11	-1.3244e-13	5.79466e-09	-1.13127e-10	1.10601e-10	-0.00892348	-2.28555e-05	-0.0195226	0.0190868		18.8833	18.8833		-0.0327654	-0.000177507	-0.172301	0.257378
92	2022-04-01 11:51:18	1148760	-9.51911e-11	-6.53906e-11	5.81835e-09	-1.0909e-10	3.11281e-10	-6.16838e-11	-1.30781e-13	5.78926e-09	-1.08981e-10	1.08015e-10	-0.0106549	-2.25903e-05	-0.0188247	0.0186577		19.1167	19.1167		-0.0350496	-0.000182809	-0.176775	0.261781
93	2022-04-01 11:51:32	1162803	-9.14608e-11	-5.90634e-11	5.83398e-09	-1.07478e-10	3.1618e-10	-5.92666e-11	-1.18127e-13	5.80481e-09	-1.07371e-10	1.09714e-10	-0.0102099	-2.03498e-05	-0.0184968	0.0189006		19.35	19.35		-0.0374838	-0.000187819	-0.181129	0.266163
94	2022-04-01 11:51:46	1176846	-9.18908e-11	-6.22065e-11	5.82844e-09	-1.10982e-10	3.11266e-10	-5.95452e-11	-1.24413e-13	5.7993e-09	-1.10871e-10	1.08009e-10	-0.0102677	-2.14531e-05	-0.019118	0.0186245		19.5833	19.5833		-0.0398728	-0.000192696	-0.185517	0.270541
95	2022-04-01 11:52:00	1190890	-9.74808e-11	-6.23191e-11	5.82194e-09	-1.04887e-10	3.20419e-10	-6.31676e-11	-1.24638e-13	5.79283e-09	-1.04782e-10	1.11185e-10	-0.0109044	-2.15159e-05	-0.0180882	0.0191936		19.8167	19.8167		-0.0423429	-0.000197709	-0.189858	0.274953
96	2022-04-01 11:52:14	1204933	-8.20116e-11	-7.20658e-11	5.81578e-09	-1.17862e-10	3.17946e-10	-5.31435e-11	-1.44132e-13	5.7867e-09	-1.17744e-10	1.10327e-10	-0.00918373	-2.49074e-05	-0.0203474	0.0190657		20.05	20.05		-0.0446865	-0.000203125	-0.194342	0.279417
97	2022-04-01 11:52:28	1218976	-8.73866e-11	-5.80909e-11	5.82822e-09	-1.1109e-10	3.14383e-10	-5.66265e-11	-1.16182e-13	5.79908e-09	-1.10979e-10	1.09091e-10	-0.00976474	-2.00345e-05	-0.0191373	0.0188118		20.2833	20.2833		-0.0468972	-0.000208368	-0.198949	0.283836
98	2022-04-01 11:52:43	1233020	-8.45271e-11	-5.92682e-11	5.83055e-09	-9.67391e-11	3.133e-10	-5.47736e-11	-1.18536e-13	5.8014e-09	-9.66424e-11	1.08715e-10	-0.00944144	-2.04324e-05	-0.0166585	0.0187395		20.5333	20.5333		-0.049298	-0.000213427	-0.203423	0.28853
99	2022-04-01 11:52:57	1247063	-7.90553e-11	-5.73025e-11	5.81474e-09	-1.08349e-10	3.08301e-10	-5.12278e-11	-1.14605e-13	5.78567e-09	-1.08241e-10	1.0698e-10	-0.00885427	-1.98084e-05	-0.0187084	0.0184906		20.7667	20.7667		-0.0514325	-0.000218121	-0.207549	0.292873
100	2022-04-01 11:53:11	1261106	-7.96143e-11	-5.99747e-11	5.82911e-09	-9.7857e-11	3.13991e-10	-5.15901e-11	-1.19949e-13	5.79996e-09	-9.77591e-11	1.08955e-10	-0.00889489	-2.06811e-05	-0.0168551	0.0187854		21	21		-0.0535032	-0.000222845	-0.211698	0.297222
101	2022-04-01 11:53:25	1275150	-7.16486e-11	-5.42515e-11	5.82607e-09	-1.02017e-10	3.20564e-10	-4.64283e-11	-1.08503e-13	5.79694e-09	-1.01915e-10	1.11236e-10	-0.0080091	-1.87173e-05	-0.0175808	0.0191887		21.2333	21.2333		-0.0554753	-0.000227442	-0.215716	0.301652
102	2022-04-01 11:53:39	1289193	-7.11756e-11	-6.77249e-11	5.81908e-09	-1.07833e-10	3.15926e-10	-4.61218e-11	-1.3545e-13	5.78998e-09	-1.07725e-10	1.09626e-10	-0.00796579	-2.33938e-05	-0.0186054	0.0189338		21.4667	21.4667		-0.0573391	-0.000232354	-0.219938	0.3061
103	2022-04-01 11:53:53	1303236	-8.42583e-11	-5.64118e-11	6.18556e-09	-1.0392e-10	3.19489e-10	-5.45994e-11	-1.12824e-13	6.15463e-09	-1.03816e-10	1.10863e-10	-0.00887127	-1.83315e-05	-0.016868	0.0180129		21.7	21.7		-0.0593034	-0.000237222	-0.224076	0.31041
104	2022-04-01 11:54:07	1317280	-8.20331e-11	-6.1111e-11	5.17194e-09	-9.46428e-11	3.06159e-10	-5.31574e-11	-1.22222e-13	5.14608e-09	-9.45482e-11	1.06237e-10	-0.0103297	-2.37505e-05	-0.0183728	0.0206443		21.9333	21.9333		-0.0615435	-0.000242132	-0.228188	0.31492
105	2022-04-01 11:54:21	1331323	-7.71311e-11	-5.54699e-11	5.04861e-09	-1.06328e-10	3.06551e-10	-4.9981e-11	-1.1094e-13	5.02337e-09	-1.06222e-10	1.06373e-10	-0.00994969	-2.20847e-05	-0.0211455	0.0211757		22.1667	22.1667		-0.0639094	-0.000247479	-0.232798	0.319799
106	2022-04-01 11:54:35	1345366	-7.66151e-11	-7.05096e-11	5.1369e-09	-1.04532e-10	3.0083e-10	-4.96466e-11	-1.41019e-13	5.11122e-09	-1.04427e-10	1.04388e-10	-0.00971326	-2.75901e-05	-0.020431	0.0204233		22.4	22.4		-0.0662035	-0.000253275	-0.237649	0.324653
107	2022-04-01 11:54:49	1359410	-8.62363e-11	-6.50527e-11	5.34398e-09	-1.01157e-10	3.06159e-10	-5.58811e-11	-1.30105e-13	5.31726e-09	-1.01056e-10	1.06237e-10	-0.0105094	-2.44685e-05	-0.0190052	0.0199797		22.6333	22.6333		-0.0685628	-0.000259348	-0.24225	0.329366
108	2022-04-01 11:55:03	1373453	-8.69996e-11	-5.86232e-11	5.46038e-09	-1.11369e-10	3.08209e-10	-5.63757e-11	-1.17246e-13	5.43308e-09	-1.11258e-10	1.06949e-10	-0.0103764	-2.15801e-05	-0.0204778	0.0196847		22.8667	22.8667		-0.0709994	-0.000264721	-0.246856	0.333994
109	2022-04-01 11:55:17	1387496	-7.13046e-11	-6.59741e-11	5.53124e-09	-1.05833e-10	3.09822e-10	-4.62054e-11	-1.31948e-13	5.50358e-09	-1.05727e-10	1.07508e-10	-0.00839551	-2.3975e-05	-0.0192106	0.0195342		23.1	23.1		-0.0731895	-0.000270035	-0.251486	0.338569
110	2022-04-01 11:55:31	1401540	-8.24093e-11	-6.71003e-11	1.81433e-08	-1.11273e-10	3.54803e-10	-5.34012e-11	-1.34201e-13	1.80526e-08	-1.11162e-10	1.23117e-10	-0.00295809	-7.43387e-06	-0.00615766	0.00681989		23.3333	23.3333		-0.0745141	-0.0002737	-0.254446	0.341644
111	2022-04-01 11:55:46	1416093	-9.54168e-11	-6.26774e-11	1.09381e-07	-1.09725e-10	3.33495e-10	-6.18301e-11	-1.25355e-13	1.08834e-07	-1.09615e-10	1.15723e-10	-0.000568113	-1.1518e-06	-0.00100718	0.0010633		23.5833	23.5833		-0.0749549	-0.000274773	-0.255342	0.342629
112	2022-04-01 11:55:59	1429867	-1.02296e-10	-6.63222e-11	2.29423e-07	-1.13401e-10	2.88974e-10	-6.62878e-11	-1.32644e-13	2.28276e-07	-1.13288e-10	1.00274e-10	-0.000290385	-5.81071e-07	-0.000496275	0.000439267		23.8	23.8		-0.0750479	-0.000274961	-0.255505	0.342792
113	2022-04-01 11:56:13	1443130	-8.89453e-11	-8.38601e-11	3.00999e-07	-9.04826e-11	2.59136e-10	-5.76366e-11	-1.6772e-13	2.99494e-07	-9.03921e-11	8.99202e-11	-0.000192446	-5.60012e-07	-0.000301816	0.00030024		24.0333	24.0333		-0.0751042	-0.000275094	-0.255598	0.342878
114	2022-04-01 11:56:26	1456393	-9.35893e-11	-7.67344e-11	3.29755e-07	-1.01146e-10	2.43986e-10	-6.06459e-11	-1.53469e-13	3.28106e-07	-1.01045e-10	8.46631e-11	-0.000184836	-4.67741e-07	-0.000307964	0.000258036		24.25	24.25		-0.0751451	-0.000275205	-0.255664	0.342939
115	2022-04-01 11:56:39	1469656	-9.80721e-11	-7.40417e-11	3.51883e-07	-1.15669e-10	2.30034e-10	-6.35507e-11	-1.48083e-13	3.50124e-07	-1.15553e-10	7.98218e-11	-0.000181509	-4.22946e-07	-0.000330036	0.000227982		24.4667	24.4667		-0.0751847	-0.000275302	-0.255733	0.342992
116	2022-04-01 11:56:52	1482920	-9.25896e-11	-8.61022e-11	3.76787e-07	-9.43418e-11	2.19721e-10	-5.99981e-11	-1.72204e-13	3.74903e-07	-9.42475e-11	7.62432e-11	-0.000160036	-4.5933e-07	-0.000251392	0.000203368		24.6833	24.6833		-0.0752217	-0.000275397	-0.255796	0.343038
117	2022-04-01 11:57:06	1496183	-1.01307e-10	-8.0543e-11	3.92284e-07	-1.00576e-10	2.13264e-10	-6.56469e-11	-1.61086e-13	3.90323e-07	-1.00475e-10	7.40026e-11	-0.000168186	-4.127e-07	-0.000257416	0.000189593		24.9167	24.9167		-0.07526	-0.000275499	-0.255855	0.343084
118	2022-04-01 11:57:19	1509446	-1.00544e-10	-7.73384e-11	4.00526e-07	-9.80291e-11	2.10108e-10	-6.51525e-11	-1.54677e-13	3.98523e-07	-9.79311e-11	7.29075e-11	-0.000163485	-3.88125e-07	-0.000245735	0.000182944		25.1333	25.1333		-0.075296	-0.000275586	-0.25591	0.343124
119	2022-04-01 11:57:32	1522710	-7.25623e-12	-7.51782e-11	4.01422e-07	-8.43228e-11	1.05452e-09	-4.70204e-12	-1.50356e-13	3.99415e-07	-8.42385e-11	3.65918e-10	-1.17723e-05	-3.76442e-07	-0.000210905	0.000916136		25.35	25.35		-0.075315	-0.000275669	-0.255959	0.343244
120	2022-04-01 11:57:45	1535973	2.76157e-09	-6.77965e-11	3.83595e-07	-2.27039e-11	2.96156e-09	1.7895e-09	-1.35593e-13	3.81677e-07	-2.26812e-11	1.02766e-09	0.00468851	-3.55256e-07	-5.94251e-05	0.00269249		25.5667	25.5667		-0.0748083	-0.000275748	-0.255988	0.343634
121	2022-04-01 11:58:02	1552486	6.11112e-09	-7.47789e-11	3.55824e-07	2.69179e-11	4.09001e-09	3.96001e-09	-1.49558e-13	3.54045e-07	2.6891e-11	1.41923e-09	0.011185	-4.22426e-07	7.59536e-05	0.00400863		25.85	25.85		-0.0725596	-0.000275858	-0.255986	0.344584
122	2022-04-01 11:58:14	1564580	8.16396e-09	-5.92068e-11	3.62453e-07	4.52789e-11	4.19868e-09	5.29025e-09	-1.18414e-13	3.60641e-07	4.52336e-11	1.45694e-09	0.014669	-3.28342e-07	0.000125426	0.00403987		26.05	26.05		-0.0699742	-0.000275933	-0.255966	0.345389
123	2022-04-01 11:58:23	1573423	9.39591e-09	-6.48274e-11	3.6747e-07	5.97591e-11	4.05386e-09	6.08855e-09	-1.29655e-13	3.65633e-07	5.96993e-11	1.40669e-09	0.0166521	-3.54604e-07	0.000163277	0.00384728		26.2	26.2		-0.0676251	-0.000275984	-0.255944	0.34598
124	2022-04-01 11:58:33	1583307	1.04428e-08	-6.07834e-11	3.72218e-07	5.35241e-11	3.71974e-09	6.76693e-09	-1.21567e-13	3.70357e-07	5.34706e-11	1.29075e-09	0.0182714	-3.28242e-07	0.000144376	0.00348515		26.3667	26.3667		-0.0647148	-0.000276041	-0.255919	0.346591
125	2022-04-01 11:58:41	1591620	1.12612e-08	-7.50553e-11	3.7383e-07	7.21646e-11	3.37277e-09	7.29726e-09	-1.50111e-13	3.71961e-07	7.20924e-11	1.17035e-09	0.0196183	-4.03566e-07	0.000193817	0.00314644		26.5	26.5		-0.0621888	-0.00027609	-0.255896	0.347033
126	2022-04-01 11:58:49	1599933	1.17348e-08	-7.5475e-11	3.73562e-07	6.41344e-11	3.01177e-09	7.60415e-09	-1.5095e-13	3.71694e-07	6.40703e-11	1.04508e-09	0.0204581	-4.06113e-07	0.000172374	0.00281168		26.6333	26.6333		-0.059517	-0.000276144	-0.255872	0.347431
127	2022-04-01 11:58:58	1608246	1.21541e-08	-5.82239e-11	3.73113e-07	5.82649e-11	2.69258e-09	7.87586e-09	-1.16448e-13	3.71247e-07	5.82066e-11	9.34325e-10	0.0212146	-3.13666e-07	0.000156787	0.00251672		26.7833	26.7833		-0.0563916	-0.000276198	-0.255847	0.34783
128	2022-04-01 11:59:06	1616559	1.24873e-08	-5.0832e-11	3.73203e-07	5.89099e-11	2.42553e-09	8.09177e-09	-1.01664e-13	3.71337e-07	5.8851e-11	8.41659e-10	0.0217909	-2.73778e-07	0.000158484	0.00226656		26.9167	26.9167		-0.0535246	-0.000276237	-0.255826	0.348149
129	2022-04-01 11:59:14	1624872	1.28186e-08	-6.56977e-11	3.74188e-07	4.52144e-11	2.20541e-09	8.30645e-09	-1.31395e-13	3.72317e-07	4.51692e-11	7.65277e-10	0.0223102	-3.52913e-07	0.000121319	0.00205545		27.05	27.05		-0.0505845	-0.000276279	-0.255807	0.348437
130	2022-04-01 11:59:23	1633185	1.29852e-08	-6.52165e-11	3.74547e-07	4.05381e-11	1.98389e-09	8.41441e-09	-1.30433e-13	3.72674e-07	4.04976e-11	6.8841e-10	0.0225785	-3.49992e-07	0.000108667	0.00184722		27.2	27.2		-0.0472178	-0.000276332	-0.25579	0.34873
131	2022-04-01 11:59:31	1641498	1.31666e-08	-6.1193e-11	3.74995e-07	4.12046e-11	1.79761e-09	8.53196e-09	-1.22386e-13	3.7312e-07	4.11634e-11	6.23771e-10	0.0228665	-3.28007e-07	0.000110322	0.00167177		27.3333	27.3333		-0.0441882	-0.000276377	-0.255775	0.348964
132	2022-04-01 11:59:39	1649811	1.33608e-08	-5.25828e-11	3.75263e-07	3.61736e-11	1.65236e-09	8.6578e-09	-1.05166e-13	3.73387e-07	3.61374e-11	5.73369e-10	0.0231872	-2.81653e-07	9.67828e-05	0.00153559		27.4667	27.4667		-0.0411179	-0.000276418	-0.255762	0.349178
133	2022-04-01 11:59:48	1658125	1.29529e-08	-6.82572e-11	3.7822e-07	3.07772e-11	1.51505e-09	8.39348e-09	-1.36514e-13	3.76329e-07	3.07464e-11	5.25722e-10	0.0223036	-3.62753e-07	8.17009e-05	0.00139698		27.6167	27.6167		-0.0377061	-0.000276466	-0.255748	0.349398
134	2022-04-01 11:59:56	1666438	1.15857e-08	-6.62915e-11	3.94076e-07	5.63299e-12	1.21381e-09	7.50753e-09	-1.32583e-13	3.92106e-07	5.62736e-12	4.21192e-10	0.0191467	-3.38131e-07	1.43516e-05	0.00107418		27.75	27.75		-0.0349428	-0.000276513	-0.255742	0.349563
135	2022-04-01 12:00:05	1675261	7.54327e-09	-6.40391e-11	3.25903e-07	-3.02827e-11	1.0156e-09	4.88804e-09	-1.28078e-13	3.24273e-07	-3.02524e-11	3.52413e-10	0.0150738	-3.9497e-07	-9.32929e-05	0.00108678		27.9	27.9		-0.0323762	-0.000276568	-0.255748	0.349725
136	2022-04-01 12:00:14	1684105	5.51799e-09	-6.29436e-11	3.1578e-07	-4.46231e-11	8.89693e-10	3.57566e-09	-1.25887e-13	3.14201e-07	-4.45785e-11	3.08723e-10	0.0113802	-4.00658e-07	-0.000141879	0.000982566		28.05	28.05		-0.0303922	-0.000276627	-0.255765	0.34988
137	2022-04-01 12:00:22	1692948	4.20139e-09	-7.1687e-11	3.12734e-07	-5.06001e-11	8.09257e-10	2.7225e-09	-1.43374e-13	3.1117e-07	-5.05495e-11	2.80812e-10	0.00874923	-4.60757e-07	-0.00016245	0.000902439		28.1833	28.1833		-0.0290502	-0.000276685	-0.255786	0.350006
138	2022-04-01 12:00:31	1701791	3.22299e-09	-7.5127e-11	3.11391e-07	-6.52524e-11	7.37107e-10	2.0885e-09	-1.50254e-13	3.09834e-07	-6.51871e-11	2.55776e-10	0.0067407	-4.8495e-07	-0.000210394	0.000825526		28.3333	28.3333		-0.0278885	-0.000276756	-0.255814	0.350136
139	2022-04-01 12:00:40	1710634	2.48898e-09	-6.80934e-11	3.1578e-07	-6.37366e-11	6.88943e-10	1.61286e-09	-1.36187e-13	3.14201e-07	-6.36729e-11	2.39063e-10	0.00513321	-4.33438e-07	-0.00020265	0.000760861		28.4833	28.4833		-0.0269979	-0.000276824	-0.255845	0.350255
140	2022-04-01 12:00:49	1719477	1.9683e-09	-6.3691e-11	3.23484e-07	-7.76041e-11	6.27606e-10	1.27546e-09	-1.27382e-13	3.21867e-07	-7.75265e-11	2.17779e-10	0.00396269	-3.9576e-07	-0.000240865	0.000676614		28.6333	28.6333		-0.0263157	-0.000276887	-0.255878	0.350362
141	2022-04-01 12:01:01	1731571	1.42638e-09	-8.12493e-11	3.34503e-07	-8.57526e-11	5.75231e-10	9.24294e-10	-1.62499e-13	3.3283e-07	-8.56668e-11	1.99605e-10	0.00277707	-4.88232e-07	-0.000257389	0.00059972		28.8333	28.8333		-0.0256418	-0.000276975	-0.255928	0.35049
142	2022-04-01 12:01:12	1742624	1.05124e-09	-7.43898e-11	3.42745e-07	-9.8717e-11	5.25697e-10	6.81204e-10	-1.4878e-13	3.41031e-07	-9.86183e-11	1.82417e-10	0.00199748	-4.36264e-07	-0.000289177	0.000534898		29.0167	29.0167		-0.0252041	-0.00027706	-0.255978	0.350594
143	2022-04-01 12:01:24	1754718	7.2429e-10	-7.71336e-11	3.49284e-07	-1.02544e-10	4.85361e-10	4.6934e-10	-1.54267e-13	3.47538e-07	-1.02441e-10	1.6842e-10	0.00135047	-4.43886e-07	-0.000294764	0.00048461		29.2167	29.2167		-0.0248693	-0.000277148	-0.256036	0.350696
144	2022-04-01 12:01:37	1767981	4.91456e-10	-8.10036e-11	3.52599e-07	-8.95258e-11	4.38207e-10	3.18463e-10	-1.62007e-13	3.50836e-07	-8.94363e-11	1.52058e-10	0.000907727	-4.61775e-07	-0.000254923	0.000433416		29.4333	29.4333		-0.0246247	-0.000277246	-0.256096	0.350795
145	2022-04-01 12:01:51	1781244	3.39204e-10	-8.78325e-11	3.47672e-07	-9.74915e-11	4.4832e-10	2.19804e-10	-1.75665e-13	3.45934e-07	-9.7394e-11	1.55567e-10	0.000635394	-5.078e-07	-0.00028154	0.000449702		29.6667	29.6667		-0.0244446	-0.000277359	-0.256158	0.350898
146	2022-04-01 12:02:04	1794508	2.06593e-10	-8.03279e-11	2.68302e-07	-9.67821e-11	5.93767e-10	1.33872e-10	-1.60656e-13	2.6696e-07	-9.66853e-11	2.06037e-10	0.000501468	-6.01796e-07	-0.000362171	0.000771789		29.8833	29.8833		-0.0243215	-0.000277479	-0.256228	0.351031
147	2022-04-01 12:02:17	1807771	1.03135e-10	-7.61815e-11	1.7397e-07	-1.04403e-10	7.13799e-10	6.68315e-11	-1.52363e-13	1.731e-07	-1.04299e-10	2.47688e-10	0.000386086	-8.80201e-07	-0.000602533	0.0014309		30.1	30.1		-0.0242253	-0.00027764	-0.256333	0.351269
148	2022-04-01 12:02:31	1821034	3.89364e-11	-6.16025e-11	1.10187e-07	-1.0307e-10	7.57229e-10	2.52308e-11	-1.23205e-13	1.09636e-07	-1.02967e-10	2.62758e-10	0.000230132	-1.12376e-06	-0.00093917	0.00239664		30.3333	30.3333		-0.0241534	-0.000277874	-0.256512	0.351716
149	2022-04-01 12:02:44	1834297	-1.00942e-11	-6.84927e-11	6.85624e-08	-1.0779e-10	7.685e-10	-6.54104e-12	-1.36985e-13	6.82196e-08	-1.07682e-10	2.6667e-10	-9.58822e-05	-2.00801e-06	-0.00157846	0.00390899		30.55	30.55		-0.0241389	-0.000278213	-0.256785	0.352399
150	2022-04-01 12:02:58	1848071	-3.68616e-11	-7.21068e-11	4.43212e-08	-1.07338e-10	7.56829e-10	-2.38863e-11	-1.44214e-13	4.40996e-08	-1.07231e-10	2.6262e-10	-0.000541645	-3.27018e-06	-0.00243156	0.00595515		30.7833	30.7833		-0.0242133	-0.000278829	-0.257253	0.35355
[truncated: 887 more rows]

## Sheet: Sheet1
					Et (ć) integral		CO (ć) integral		CO2 (ć) integral		EtO (ć) integral
[truncated: 11 more rows]
